# Supplementary material
Source: PubMed Central journal article supplement (PMC10935607)
Supplement: NIHMS1962202-supplement-Supp_2.pdf [file NIHMS1962202-supplement-Supp_2.pdf]

**Brown Laboratory**  
SureTyper Detailed Report  
FOR INTERNAL USE ONLY

**TEST INFO**

|                                  |                                 |                                         |
|----------------------------------|---------------------------------|-----------------------------------------|
| <b>Sample Date:</b>              | <b>Test Date:</b> 2/1/2023      | <b>Kit Name:</b> LinkSēq HLA ABCDRDQDP+ |
| <b>Sample ID:</b> 20230131       | <b>Kit Exp Date:</b> 2023-10-14 | <b>Kit Lot #:</b> K4238-AR              |
| <b>Patient ID:</b> WB199         | <b>Physician:</b>               | <b>Plate 1 ID:</b> SX322107-QXD         |
| <b>Patient Name:</b> Cord, Blood | <b>Director:</b>                | <b>Plate 2 ID:</b>                      |

**SUMMARY**

This session includes tests for A, B, C, DR, DQA, DQB, DPA and DPB

| TEST     | GENOTYPE        | PHENOTYPE          |
|----------|-----------------|--------------------|
| HLA-A    | A*02 A*02       | A2 A2              |
| HLA-B    | B*44 B*44       | B44 B44            |
| HLA-DRB1 | DRB1*07 DRB1*11 | DR7 DR11           |
| HLA-DQA1 | DQA1*02 DQA1*05 | DQA1*02<br>DQA1*05 |
| HLA-DPA1 | DPA1*01 DPA1*01 | DPA1*01<br>DPA1*01 |

| TEST       | GENOTYPE                     | PHENOTYPE      |
|------------|------------------------------|----------------|
| HLA-C      | C*05 C*05                    | Cw5 Cw5        |
| Bw         | -                            | Bw4 Bw4        |
| HLA-DRB345 | DRB3*02<br>DRB4*01:03:01:02N | DR52 DR53-Null |
| HLA-DQB1   | DQB1*03 DQB1*03              | DQ7 DQ9        |

| EPITYPE      | ALLELES                                                                                                                                                                                                                                                                                                                                                                                                                                                                                                                                                                                                                                                                                                                                                                                                                                                                                                                                                                                                                                                                                                                                                                                                                                                                                                                                                                                | HVR-A | HVR-B | HVR-C | HVR-D | HVR-E | HVR-F |
|--------------|----------------------------------------------------------------------------------------------------------------------------------------------------------------------------------------------------------------------------------------------------------------------------------------------------------------------------------------------------------------------------------------------------------------------------------------------------------------------------------------------------------------------------------------------------------------------------------------------------------------------------------------------------------------------------------------------------------------------------------------------------------------------------------------------------------------------------------------------------------------------------------------------------------------------------------------------------------------------------------------------------------------------------------------------------------------------------------------------------------------------------------------------------------------------------------------------------------------------------------------------------------------------------------------------------------------------------------------------------------------------------------------|-------|-------|-------|-------|-------|-------|
| <b>EDP04</b> | <b>DPB1* 04:01:01:01</b> , 04:01:01:02e, 04:01:01:03e,<br>04:01:01:04e, 04:01:01:05e, 04:01:01:06e, 04:01:01:07e,<br>04:01:01:08e, 04:01:01:09e, 04:01:01:10e, 04:01:01:11e,<br>04:01:01:12e, 04:01:01:13e, 04:01:01:14e, 04:01:01:15e,<br>04:01:01:16e, 04:01:01:17e, 04:01:01:18e, 04:01:01:19e,<br>04:01:01:20e, 04:01:01:21e, 04:01:01:22e, 04:01:01:23e,<br>04:01:01:24Ne, 04:01:01:25e, 04:01:01:26e, 04:01:01:27e,<br>04:01:01:28e, 04:01:01:29e, 04:01:01:30e, 04:01:01:31e,<br>04:01:01:32e, 04:01:01:33e, 04:01:01:34e, 04:01:01:35e,<br>04:01:01:36e, 04:01:01:37e, 04:01:01:38e, 04:01:01:39e,<br>04:01:01:40e, 04:01:01:41e, 04:01:01:42e, 04:01:01:43e,<br>04:01:01:44e, 04:01:01:45e, 04:01:01:46e, 04:01:01:47e,<br>04:01:01:48e, 04:01:01:49e, 04:01:01:50e, 04:01:01:51e,<br>04:01:01:52e, 04:01:01:53e, 04:01:02e, 04:01:03e,<br>04:01:04:01e, 04:01:04:02e, 04:01:05e, 04:01:06e,<br>04:01:07e, 04:01:08e, 04:01:09e, 04:01:10e, 04:01:11e,<br>04:01:12e, 04:01:13e, 04:01:14e, 04:01:15e, 04:01:16e,<br>04:01:17e, 04:01:18e, 04:01:19e, 04:01:20e, 04:01:21e,<br>04:01:22e, 04:01:23e, 04:01:24e, 04:01:25e, 04:01:26e,<br>04:01:27e, 04:01:28e, 04:01:29e, 04:01:30e, 04:01:31e,<br>04:01:32e, 04:01:33e, 04:01:34e, 04:01:35e, 04:01:36e,<br>04:01:37:01e, 04:01:37:02e, 04:01:38e, 04:01:39:01e,<br>04:01:39:02e, 04:01:40e, 04:01:41e, 04:01:42e, 04:01:43e, | LFQG  | EEFA  | AAE   | ILEEK | M     | GGPM  |

04:01:44e, 04:01:45e, 04:01:46e, 04:01:47e, 04:01:48e,  
 04:01:49e, 04:01:50e / DPB1\* 99:01e / DPB1\* 120:01Ne /  
 DPB1\* 121:01e / DPB1\* 128:01e / DPB1\* 134:01e / DPB1\*  
 149:01e / DPB1\* 169:01e / DPB1\* 174:01e / DPB1\*  
 175:01e / DPB1\* 180:01e / DPB1\* 181:01e / DPB1\*  
 192:01e / DPB1\* 193:01e / DPB1\* 194:01e / DPB1\*  
 195:01e / DPB1\* 212:01e / DPB1\* 213:01:01e,  
 213:01:02e / DPB1\* 224:01e / DPB1\* 225:01e / DPB1\*  
 228:01e / DPB1\* 231:01e / DPB1\* 232:01e / DPB1\*  
 240:01e / DPB1\* 253:01e / DPB1\* 255:01e / DPB1\*  
 262:01e / DPB1\* 272:01e / DPB1\* 275:01e / DPB1\*  
 276:01e / DPB1\* 281:01e / DPB1\* 282:01e / DPB1\*  
 283:01e / DPB1\* 298:01e / DPB1\* 320:01e / DPB1\*  
 323:01e / DPB1\* 334:01:01e, 334:01:02e / DPB1\*  
 335:01e / DPB1\* 336:01e / DPB1\* 341:01e / DPB1\*  
 350:01e / DPB1\* 356:01e / DPB1\* 360:01e / DPB1\*  
 372:01e / DPB1\* 376:01e / DPB1\* 378:01e / DPB1\*  
 396:01e / DPB1\* 397:01e / DPB1\* 415:01e / DPB1\*  
 418:01e / DPB1\* 425:01e / DPB1\* 426:01e / DPB1\*  
 428:01e / DPB1\* 434:01e / DPB1\* 453:01e / DPB1\*  
 455:01Ne / DPB1\* 459:01e / DPB1\* 464:01e / DPB1\*  
 465:01e / DPB1\* 468:01e / DPB1\* 475:01e / DPB1\*  
 476:01e / DPB1\* 479:01e / DPB1\* 485:01e / DPB1\*  
 486:01e / DPB1\* 487:01e / DPB1\* 497:01e / DPB1\*  
 500:01e / DPB1\* 520:01e / DPB1\* 521:01e / DPB1\*  
 522:01e / DPB1\* 523:01:01e, 523:01:02e / DPB1\*  
 524:01e / DPB1\* 529:01e / DPB1\* 534:01e / DPB1\*  
 553:01e / DPB1\* 554:01e / DPB1\* 556:01e / DPB1\*  
 559:01e / DPB1\* 569:01e / DPB1\* 575:01e / DPB1\*  
 578:01e / DPB1\* 583:01e / DPB1\* 591:01e / DPB1\*  
 593:01e / DPB1\* 607:01e / DPB1\* 614:01e / DPB1\*  
 615:01e / DPB1\* 618:01e / DPB1\* 625:01e / DPB1\*  
 643:01e / DPB1\* 658:01e / DPB1\* 666:01e / DPB1\*  
 670:01e / DPB1\* 677:01e / DPB1\* 682:01e / DPB1\*  
 683:01e / DPB1\* 694:01e / DPB1\* 699:01e / DPB1\*  
 722:01e / DPB1\* 739:01e / DPB1\* 742:01e / DPB1\*  
 750:01e / DPB1\* 754:01Ne / DPB1\* 755:01e / DPB1\*  
 756:01Ne / DPB1\* 757:01e / DPB1\* 758:01e / DPB1\*  
 761:01e / DPB1\* 765:01e / DPB1\* 767:01e / DPB1\*  
 769:01e / DPB1\* 772:01e / DPB1\* 773:01e / DPB1\*  
 784:01e / DPB1\* 788:01e / DPB1\* 795:01e / DPB1\*  
 803:01e / DPB1\* 804:01e / DPB1\* 806:01:01:01e,  
 806:01:01:02e / DPB1\* 808:01e / DPB1\* 811:01e / DPB1\*  
 812:01e / DPB1\* 813:01e / DPB1\* 814:01e / DPB1\*  
 820:01e / DPB1\* 824:01:01e, 824:01:02e / DPB1\*  
 826:01e / DPB1\* 837:01e / DPB1\* 842:01e / DPB1\*  
 850:01e / DPB1\* 852:01e / DPB1\* 859:01e / DPB1\*  
 878:01Ne / DPB1\* 880:01e / DPB1\* 882:01e / DPB1\*  
 895:01e / DPB1\* 915:01e / DPB1\* 926:01e / DPB1\*  
 932:01e / DPB1\* 939:01e / DPB1\* 957:01e / DPB1\*  
 966:01e / DPB1\* 974:01Ne / DPB1\* 978:01e / DPB1\*  
 988:01e / DPB1\* 989:01e / DPB1\* 992:01e / DPB1\*  
 993:01e / DPB1\* 997:01e / DPB1\* 1001:01e / DPB1\*  
 1002:01e / DPB1\* 1003:01e / DPB1\* 1004:01e / DPB1\*  
 1010:01e / DPB1\* 1011:01e / DPB1\* 1023:01e / DPB1\*  
 1033:01e / DPB1\* 1040:01e / DPB1\* 1042:01e / DPB1\*  
 1048:01e / DPB1\* 1060:01e / DPB1\* 1062:01e / DPB1\*  
 1064:01e / DPB1\* 1066:01e / DPB1\* 1074:01e / DPB1\*  
 1086:01e / DPB1\* 1091:01e / DPB1\* 1100:01e / DPB1\*  
 1108:01e / DPB1\* 1112:01Ne / DPB1\* 1113:01e / DPB1\*  
 1121:01Ne / DPB1\* 1129:01e / DPB1\* 1132:01e / DPB1\*  
 1139:01e / DPB1\* 1146:01e / DPB1\* 1148:01Qe / DPB1\*  
 1152:01e / DPB1\* 1155:01e / DPB1\* 1161:01e / DPB1\*  
 1164:01e / DPB1\* 1167:01e

EDP04

DPB1\* 04:01:01:01, 04:01:01:02e, 04:01:01:03e,

LFQG

EEFA

AAE

ILEEK

M

GGPM

04:01:01:04e, 04:01:01:05e, 04:01:01:06e, 04:01:01:07e,  
04:01:01:08e, 04:01:01:09e, 04:01:01:10e, 04:01:01:11e,  
04:01:01:12e, 04:01:01:13e, 04:01:01:14e, 04:01:01:15e,  
04:01:01:16e, 04:01:01:17e, 04:01:01:18e, 04:01:01:19e,  
04:01:01:20e, 04:01:01:21e, 04:01:01:22e, 04:01:01:23e,  
04:01:01:24Ne, 04:01:01:25e, 04:01:01:26e, 04:01:01:27e,  
04:01:01:28e, 04:01:01:29e, 04:01:01:30e, 04:01:01:31e,  
04:01:01:32e, 04:01:01:33e, 04:01:01:34e, 04:01:01:35e,  
04:01:01:36e, 04:01:01:37e, 04:01:01:38e, 04:01:01:39e,  
04:01:01:40e, 04:01:01:41e, 04:01:01:42e, 04:01:01:43e,  
04:01:01:44e, 04:01:01:45e, 04:01:01:46e, 04:01:01:47e,  
04:01:01:48e, 04:01:01:49e, 04:01:01:50e, 04:01:01:51e,  
04:01:01:52e, 04:01:01:53e, 04:01:02e, 04:01:03e,  
04:01:04:01e, 04:01:04:02e, 04:01:05e, 04:01:06e,  
04:01:07e, 04:01:08e, 04:01:09e, 04:01:10e, 04:01:11e,  
04:01:12e, 04:01:14e, 04:01:15e, 04:01:16e, 04:01:17e,  
04:01:18e, 04:01:19e, 04:01:20e, 04:01:21e, 04:01:22e,  
04:01:23e, 04:01:24e, 04:01:25e, 04:01:26e, 04:01:27e,  
04:01:28e, 04:01:29e, 04:01:30e, 04:01:31e, 04:01:32e,  
04:01:33e, 04:01:34e, 04:01:35e, 04:01:36e, 04:01:37:01e,  
04:01:37:02e, 04:01:38e, 04:01:39:01e, 04:01:39:02e,  
04:01:40e, 04:01:41e, 04:01:42e, 04:01:43e, 04:01:44e,  
04:01:45e, 04:01:46e, 04:01:47e, 04:01:48e, 04:01:49e,  
04:01:50e / DPB1\* 99:01e / DPB1\* 120:01Ne / DPB1\*  
121:01e / DPB1\* 128:01e / DPB1\* 134:01e / DPB1\*  
149:01e / DPB1\* 169:01e / DPB1\* 174:01e / DPB1\*  
175:01e / DPB1\* 180:01e / DPB1\* 181:01e / DPB1\*  
192:01e / DPB1\* 194:01e / DPB1\* 195:01e / DPB1\*  
212:01e / DPB1\* 213:01:01e, 213:01:02e / DPB1\*  
224:01e / DPB1\* 225:01e / DPB1\* 228:01e / DPB1\*  
231:01e / DPB1\* 232:01e / DPB1\* 240:01e / DPB1\*  
253:01e / DPB1\* 255:01e / DPB1\* 262:01e / DPB1\*  
272:01e / DPB1\* 275:01e / DPB1\* 276:01e / DPB1\*  
281:01e / DPB1\* 282:01e / DPB1\* 283:01e / DPB1\*  
298:01e / DPB1\* 320:01e / DPB1\* 323:01e / DPB1\*  
334:01:01e, 334:01:02e / DPB1\* 335:01e / DPB1\*  
336:01e / DPB1\* 341:01e / DPB1\* 350:01e / DPB1\*  
356:01e / DPB1\* 360:01e / DPB1\* 372:01e / DPB1\*  
376:01e / DPB1\* 378:01e / DPB1\* 396:01e / DPB1\*  
397:01e / DPB1\* 415:01e / DPB1\* 418:01e / DPB1\*  
425:01e / DPB1\* 426:01e / DPB1\* 428:01e / DPB1\*  
434:01e / DPB1\* 453:01e / DPB1\* 455:01Ne / DPB1\*  
459:01e / DPB1\* 464:01e / DPB1\* 465:01e / DPB1\*  
468:01e / DPB1\* 475:01e / DPB1\* 476:01e / DPB1\*  
479:01e / DPB1\* 485:01e / DPB1\* 486:01e / DPB1\*  
487:01e / DPB1\* 497:01e / DPB1\* 500:01e / DPB1\*  
520:01e / DPB1\* 521:01e / DPB1\* 522:01e / DPB1\*  
523:01:01e, 523:01:02e / DPB1\* 524:01e / DPB1\*  
529:01e / DPB1\* 534:01e / DPB1\* 553:01e / DPB1\*  
554:01e / DPB1\* 556:01e / DPB1\* 559:01e / DPB1\*  
569:01e / DPB1\* 575:01e / DPB1\* 578:01e / DPB1\*  
583:01e / DPB1\* 591:01e / DPB1\* 593:01e / DPB1\*  
607:01e / DPB1\* 614:01e / DPB1\* 615:01e / DPB1\*  
618:01e / DPB1\* 625:01e / DPB1\* 643:01e / DPB1\*  
658:01e / DPB1\* 666:01e / DPB1\* 670:01e / DPB1\*  
677:01e / DPB1\* 682:01e / DPB1\* 683:01e / DPB1\*  
694:01e / DPB1\* 699:01e / DPB1\* 722:01e / DPB1\*  
739:01e / DPB1\* 742:01e / DPB1\* 750:01e / DPB1\*  
754:01Ne / DPB1\* 755:01e / DPB1\* 756:01Ne / DPB1\*  
757:01e / DPB1\* 758:01e / DPB1\* 761:01e / DPB1\*  
765:01e / DPB1\* 767:01e / DPB1\* 769:01e / DPB1\*  
772:01e / DPB1\* 773:01e / DPB1\* 784:01e / DPB1\*  
788:01e / DPB1\* 795:01e / DPB1\* 803:01e / DPB1\*  
804:01e / DPB1\* 806:01:01:01e, 806:01:01:02e / DPB1\*  
808:01e / DPB1\* 811:01e / DPB1\* 812:01e / DPB1\*  
813:01e / DPB1\* 814:01e / DPB1\* 820:01e / DPB1\*

824:01:01e, 824:01:02e / DPB1\* 826:01e / DPB1\*  
 837:01e / DPB1\* 842:01e / DPB1\* 850:01e / DPB1\*  
 852:01e / DPB1\* 859:01e / DPB1\* 878:01Ne / DPB1\*  
 880:01e / DPB1\* 882:01e / DPB1\* 895:01e / DPB1\*  
 915:01e / DPB1\* 926:01e / DPB1\* 932:01e / DPB1\*  
 939:01e / DPB1\* 957:01e / DPB1\* 966:01e / DPB1\*  
 974:01Ne / DPB1\* 978:01e / DPB1\* 988:01e / DPB1\*  
 989:01e / DPB1\* 992:01e / DPB1\* 993:01e / DPB1\*  
 997:01e / DPB1\* 1001:01e / DPB1\* 1002:01e / DPB1\*  
 1003:01e / DPB1\* 1004:01e / DPB1\* 1010:01e / DPB1\*  
 1011:01e / DPB1\* 1023:01e / DPB1\* 1033:01e / DPB1\*  
 1040:01e / DPB1\* 1042:01e / DPB1\* 1048:01e / DPB1\*  
 1060:01e / DPB1\* 1062:01e / DPB1\* 1064:01e / DPB1\*  
 1066:01e / DPB1\* 1074:01e / DPB1\* 1086:01e / DPB1\*  
 1091:01e / DPB1\* 1100:01e / DPB1\* 1108:01e / DPB1\*  
 1112:01Ne / DPB1\* 1113:01e / DPB1\* 1121:01Ne / DPB1\*  
 1129:01e / DPB1\* 1132:01e / DPB1\* 1139:01e / DPB1\*  
 1146:01e / DPB1\* 1148:01Qe / DPB1\* 1152:01e / DPB1\*  
 1155:01e / DPB1\* 1161:01e / DPB1\* 1164:01e / DPB1\*  
 1167:01e

*This genotype consists of alleles from a single group.  
 This epitope was MANUALLY chosen.*

The C\*05 C\*05 test phenotype was MANUALLY chosen.  
 The EDP\*04 EDP\*04 test phenotype was MANUALLY chosen.

*(Notice: Cannot exclude other combinations. Review all results.)  
 All test results are based on IMGT/HLA database release version 3.43.0 - January 2021*

*For research use only. Not for use in diagnostic procedures.*

### LABORATORY ASSIGNMENTS

|                 |                 |                   |
|-----------------|-----------------|-------------------|
| HLA-A: _____    | HLA-B: _____    | Bw: _____         |
| HLA-C: _____    | HLA-DRB1: _____ | HLA-DRB345: _____ |
| HLA-DQA1: _____ | HLA-DQB1: _____ |                   |
| HLA-DPA1: _____ | HLA-DPB1: _____ |                   |

### REVIEW

|                    |                  |             |
|--------------------|------------------|-------------|
| Analyzed By: _____ | Signature: _____ | Date: _____ |
| Reviewed By: _____ | Signature: _____ | Date: _____ |

## HLA-A

| ALLELE GROUP                   | ALLELES                                                                                                                                                                                                                                                                                                                                                                                                                                                                                                                                                                                                                                                                                                                                                                                                                                                                                                                                                                                                                                                                                                                                                                                                                                                                                                                                                                                                                                                                                                                                                                                                                                                                                                                                                                                                                                                                                                                                                                                                                                                                                                                                                                                                                                                                                                                                                                                                                                                                                                                                                                                                                                                                                                                                                                                                                                                                                                                                                                                                                                                                                                                                                                                                                                                                                                                                                                                                                                                                                                                                                                                                                                                                                                                                                                                                                                                                                                                                                                                                                                                                                                                                                                                                                                                                                                                                                                                                                                                                                                   | P GROUP                                                                                                                                                                                    | ANTIGEN |
|--------------------------------|-----------------------------------------------------------------------------------------------------------------------------------------------------------------------------------------------------------------------------------------------------------------------------------------------------------------------------------------------------------------------------------------------------------------------------------------------------------------------------------------------------------------------------------------------------------------------------------------------------------------------------------------------------------------------------------------------------------------------------------------------------------------------------------------------------------------------------------------------------------------------------------------------------------------------------------------------------------------------------------------------------------------------------------------------------------------------------------------------------------------------------------------------------------------------------------------------------------------------------------------------------------------------------------------------------------------------------------------------------------------------------------------------------------------------------------------------------------------------------------------------------------------------------------------------------------------------------------------------------------------------------------------------------------------------------------------------------------------------------------------------------------------------------------------------------------------------------------------------------------------------------------------------------------------------------------------------------------------------------------------------------------------------------------------------------------------------------------------------------------------------------------------------------------------------------------------------------------------------------------------------------------------------------------------------------------------------------------------------------------------------------------------------------------------------------------------------------------------------------------------------------------------------------------------------------------------------------------------------------------------------------------------------------------------------------------------------------------------------------------------------------------------------------------------------------------------------------------------------------------------------------------------------------------------------------------------------------------------------------------------------------------------------------------------------------------------------------------------------------------------------------------------------------------------------------------------------------------------------------------------------------------------------------------------------------------------------------------------------------------------------------------------------------------------------------------------------------------------------------------------------------------------------------------------------------------------------------------------------------------------------------------------------------------------------------------------------------------------------------------------------------------------------------------------------------------------------------------------------------------------------------------------------------------------------------------------------------------------------------------------------------------------------------------------------------------------------------------------------------------------------------------------------------------------------------------------------------------------------------------------------------------------------------------------------------------------------------------------------------------------------------------------------------------------------------------------------------------------------------------------------------------|--------------------------------------------------------------------------------------------------------------------------------------------------------------------------------------------|---------|
| A*02<br>17 common<br>1333 rare | A* 02:01:01:01, 02:01:01:02Le, 02:01:01:03e, 02:01:01:04e, 02:01:01:05e, 02:01:01:06e, 02:01:01:07e, 02:01:01:08e, 02:01:01:09e, 02:01:01:10e, 02:01:01:11e, 02:01:01:12e, 02:01:01:13e, 02:01:01:14e, 02:01:01:15e, 02:01:01:16e, 02:01:01:17e, 02:01:01:18e, 02:01:01:19e, 02:01:01:20e, 02:01:01:21e, 02:01:01:22e, 02:01:01:23e, 02:01:01:24e, 02:01:01:25e, 02:01:01:26e, 02:01:01:27e, 02:01:01:28e, 02:01:01:29e, 02:01:01:30e, 02:01:01:31e, 02:01:01:32e, 02:01:01:33e, 02:01:01:34e, 02:01:01:35e, 02:01:01:36e, 02:01:01:37e, 02:01:01:38e, 02:01:01:39e, 02:01:01:40e, 02:01:01:41e, 02:01:01:42e, 02:01:01:43e, 02:01:01:44e, 02:01:01:45e, 02:01:01:46e, 02:01:01:47e, 02:01:01:48e, 02:01:01:49e, 02:01:01:50e, 02:01:01:51e, 02:01:01:52e, 02:01:01:53e, 02:01:01:54e, 02:01:01:55e, 02:01:01:56e, 02:01:01:57e, 02:01:01:58e, 02:01:01:59e, 02:01:01:60e, 02:01:01:61e, 02:01:01:62e, 02:01:01:63e, 02:01:01:64e, 02:01:01:65e, 02:01:01:66e, 02:01:01:67e, 02:01:01:68e, 02:01:01:69e, 02:01:01:70e, 02:01:01:71e, 02:01:01:72e, 02:01:01:73e, 02:01:01:74e, 02:01:01:75e, 02:01:01:76e, 02:01:01:77e, 02:01:01:78e, 02:01:01:79e, 02:01:01:80e, 02:01:01:81e, 02:01:01:82e, 02:01:01:83e, 02:01:01:84e, 02:01:01:85e, 02:01:01:86e, 02:01:01:87e, 02:01:01:88e, 02:01:01:89e, 02:01:01:90e, 02:01:01:91e, 02:01:01:92e, 02:01:01:93e, 02:01:01:94e, 02:01:01:95e, 02:01:01:96e, 02:01:01:97e, 02:01:01:98e, 02:01:01:99e, 02:01:01:100e, 02:01:01:101e, 02:01:01:102e, 02:01:01:103e, 02:01:01:104e, 02:01:01:105e, 02:01:01:106e, 02:01:01:107e, 02:01:01:108e, 02:01:01:109e, 02:01:01:110e, 02:01:01:111e, 02:01:01:112e, 02:01:01:113e, 02:01:01:114e, 02:01:01:115e, 02:01:01:116e, 02:01:01:117e, 02:01:01:118e, 02:01:01:119e, 02:01:01:120e, 02:01:01:121e, 02:01:01:122e, 02:01:01:123e, 02:01:01:124e, 02:01:01:125e, 02:01:01:126e, 02:01:01:127e, 02:01:01:128e, 02:01:01:129e, 02:01:01:130e, 02:01:01:131e, 02:01:01:132e, 02:01:01:133e, 02:01:01:134Qe, 02:01:01:135e, 02:01:01:136e, 02:01:01:137e, 02:01:01:138e, 02:01:01:139e, 02:01:01:140e, 02:01:01:141e, 02:01:01:142e, 02:01:01:143e, 02:01:01:144e, 02:01:01:145e, 02:01:01:146e, 02:01:01:147e, 02:01:01:148e, 02:01:01:149e, 02:01:01:150e, 02:01:01:151e, 02:01:01:152e, 02:01:01:153e, 02:01:01:154e, 02:01:01:155e, 02:01:01:156e, 02:01:01:157e, 02:01:01:158e, 02:01:01:159e, 02:01:01:160e, 02:01:01:161e, 02:01:01:162e, 02:01:01:163e, 02:01:01:164e, 02:01:01:165e, 02:01:01:166e, 02:01:01:167e, 02:01:01:168e, 02:01:01:169e, 02:01:02:01e, 02:01:02:02e, 02:01:03e, <b>02:01:04</b> , 02:01:05e, 02:01:06e, 02:01:07e, 02:01:08e, 02:01:10e, 02:01:11e, 02:01:12e, 02:01:13e, 02:01:14Qe, 02:01:15e, 02:01:18e, 02:01:19e, 02:01:21e, 02:01:22e, 02:01:23e, 02:01:24e, 02:01:25e, 02:01:26e, 02:01:27e, 02:01:28e, 02:01:29e, 02:01:30e, 02:01:31e, 02:01:32e, 02:01:33e, 02:01:34e, 02:01:35e, 02:01:36e, 02:01:37e, 02:01:38e, 02:01:39e, 02:01:40e, 02:01:41e, 02:01:42e, 02:01:43e, 02:01:44e, 02:01:45e, 02:01:46e, 02:01:47e, 02:01:48e, 02:01:49e, 02:01:50e, 02:01:51e, 02:01:53e, 02:01:54e, 02:01:55e, 02:01:56e, 02:01:57e, 02:01:58e, 02:01:59e, 02:01:60e, 02:01:61e, 02:01:62e, 02:01:63e, 02:01:64e, 02:01:65e, 02:01:66e, 02:01:67e, 02:01:68e, 02:01:69e, 02:01:70e, 02:01:71e, 02:01:72e, 02:01:73e, 02:01:75e, 02:01:76e, 02:01:77e, 02:01:78e, 02:01:79e, 02:01:80e, 02:01:81e, 02:01:83e, 02:01:84e, 02:01:85e, 02:01:86e, 02:01:87e, 02:01:88e, 02:01:89e, 02:01:90e, 02:01:91e, 02:01:92e, 02:01:93e, 02:01:94e, 02:01:95e, 02:01:96e, 02:01:97e, 02:01:98e, 02:01:99e, 02:01:100e, 02:01:101e, 02:01:102e, 02:01:103e, 02:01:104e, 02:01:105e, 02:01:106e, 02:01:107e, 02:01:108e, 02:01:109e, 02:01:110e, 02:01:111e, 02:01:112e, 02:01:113e, 02:01:114e, 02:01:115e, 02:01:116e, 02:01:117e, 02:01:118e, 02:01:119e, 02:01:120e, 02:01:121e, 02:01:122e, 02:01:123e, 02:01:124e, 02:01:125e, 02:01:126e, 02:01:127e, 02:01:128e, 02:01:129e, 02:01:130e, 02:01:131e, 02:01:132e, 02:01:133e, 02:01:134e, 02:01:135e, 02:01:136e, 02:01:137e, 02:01:138e, 02:01:139e, 02:01:140e, 02:01:141e, 02:01:142e, 02:01:143e, 02:01:144e, 02:01:145e, 02:01:146e, 02:01:147e, 02:01:148e, 02:01:149e, 02:01:150e, 02:01:151e, 02:01:152e, 02:01:153e, 02:01:154e, 02:01:155e, 02:01:156e, 02:01:157e, 02:01:158e, 02:01:159e, 02:01:160e, 02:01:161e, 02:01:162e, 02:01:163e, 02:01:164e, 02:01:166e, 02:01:167e, 02:01:168e, 02:01:169e, 02:01:170e, 02:01:171e, 02:01:172e, | 02:01P<br>02:02P<br>02:04P<br>02:05P<br>02:06P<br>02:07P<br>02:11P<br>02:14P<br>02:16P<br>02:17P<br>02:20P<br>02:22P<br>02:24P<br>02:29P<br>02:42P<br>02:49P<br>02:65P<br>02:74P<br>02:79P | A2      |

|                                                                                                                                                                                                                                                                                                                                                                                                                                                                                                                                                                                                                                                                                                                                                                                                                                                                                                                                                                                                                                                                                                                                                                                                                                                                                                                                                                                                                                                                                                                                                                                                                                                                                                                                                                                                                                                                                                                                                                                                    |                                                                                                                                                                                                                                                                                                                                                    |      |
|----------------------------------------------------------------------------------------------------------------------------------------------------------------------------------------------------------------------------------------------------------------------------------------------------------------------------------------------------------------------------------------------------------------------------------------------------------------------------------------------------------------------------------------------------------------------------------------------------------------------------------------------------------------------------------------------------------------------------------------------------------------------------------------------------------------------------------------------------------------------------------------------------------------------------------------------------------------------------------------------------------------------------------------------------------------------------------------------------------------------------------------------------------------------------------------------------------------------------------------------------------------------------------------------------------------------------------------------------------------------------------------------------------------------------------------------------------------------------------------------------------------------------------------------------------------------------------------------------------------------------------------------------------------------------------------------------------------------------------------------------------------------------------------------------------------------------------------------------------------------------------------------------------------------------------------------------------------------------------------------------|----------------------------------------------------------------------------------------------------------------------------------------------------------------------------------------------------------------------------------------------------------------------------------------------------------------------------------------------------|------|
| 02:01:173e, 02:01:174e, 02:01:175e, 02:01:176e, 02:01:177e, 02:01:178e, 02:01:179e, 02:01:180e, 02:01:181e, 02:01:182e, 02:01:183e, 02:01:184e, 02:01:185e, 02:01:186e, 02:01:187e, 02:01:188e, 02:01:189e, 02:01:190e, 02:01:191e, <b>02:02:01:01</b> , 02:02:01:02e, 02:02:01:03e, 02:02:01:04e, 02:02:01:05e, 02:02:01:06e, 02:02:01:07e, 02:02:01:08e, 02:02:02e, 02:02:03e, 02:02:04e, 02:02:05e, 02:02:06e, <b>02:04</b> , <b>02:05:01:01</b> , 02:05:01:02e, 02:05:01:03e, 02:05:01:04e, 02:05:01:05e, 02:05:01:06e, 02:05:01:07e, 02:05:01:08e, 02:05:01:09e, 02:05:01:10e, 02:05:01:11e, 02:05:01:12e, 02:05:01:13e, 02:05:02e, 02:05:04e, 02:05:06e, 02:05:07e, 02:05:08e, 02:05:09e, 02:05:10e, 02:05:11e, 02:05:12e, <b>02:06:01:01</b> , 02:06:01:02e, 02:06:01:03e, 02:06:01:04e, 02:06:01:05e, 02:06:01:06e, 02:06:01:07e, 02:06:01:08e, 02:06:01:09e, 02:06:01:10e, 02:06:01:11e, 02:06:01:12e, 02:06:02e, 02:06:03e, 02:06:04e, 02:06:05e, 02:06:06e, 02:06:08e, 02:06:09e, 02:06:10e, 02:06:11e, 02:06:13e, 02:06:14e, 02:06:15e, 02:06:16e, 02:06:17e, 02:06:18e, 02:06:19e, 02:06:20e, 02:06:21e, 02:06:22e, 02:06:23e, 02:06:24e, 02:06:25e, 02:06:26e, 02:06:27e, 02:06:28e, 02:06:29e, 02:06:30e, <b>02:07:01:01</b> , 02:07:01:02e, 02:07:02e, 02:07:03e, 02:07:04e, 02:07:05e, 02:07:06e, 02:07:07e, 02:07:08e, 02:07:09e, 02:07:10e, 02:07:11e, 02:07:13e, 02:07:14e, 02:07:16e, 02:07:17e, 02:07:18e, 02:07:19e, <b>02:09:01:01</b> , 02:09:01:02e, 02:09:01:03e, <b>02:11:01:01</b> , 02:11:01:02e, 02:11:01:03e, 02:11:03e, 02:11:04e, 02:11:05e, 02:11:06e, 02:11:07e, 02:11:08e, 02:11:09e, <b>02:14</b> , <b>02:16d</b> , <b>02:17:02:01</b> , 02:17:02:02e, 02:17:03e, 02:17:04e, <b>02:20:01</b> , 02:20:02e, <b>02:22:01:01</b> , 02:22:01:02e, 02:22:02e, <b>02:24:01</b> , 02:24:02e, <b>02:29d</b> , 02:42:01e, <b>02:49:01d</b> , 02:49:02e, 02:65e, 02:66e, <b>02:74:01d</b> , 02:74:02e, 02:79:01e, 02:79:02e, 02:89:01e, 02:89:02e, 02:97:01e, 02:97:02e |                                                                                                                                                                                                                                                                                                                                                    |      |
| <b>A* 02:08</b> , 02:12d, 02:13d, 02:18d, 02:21d, 02:25d, 02:31e, 02:34d, 02:41e, 02:59e, 02:67e, 02:68e, 02:70e, 02:71e, 02:72e, 02:77e, 02:90e, 02:95e, 02:105e                                                                                                                                                                                                                                                                                                                                                                                                                                                                                                                                                                                                                                                                                                                                                                                                                                                                                                                                                                                                                                                                                                                                                                                                                                                                                                                                                                                                                                                                                                                                                                                                                                                                                                                                                                                                                                  | -                                                                                                                                                                                                                                                                                                                                                  |      |
| A* 02:03:05e                                                                                                                                                                                                                                                                                                                                                                                                                                                                                                                                                                                                                                                                                                                                                                                                                                                                                                                                                                                                                                                                                                                                                                                                                                                                                                                                                                                                                                                                                                                                                                                                                                                                                                                                                                                                                                                                                                                                                                                       | 02:03P                                                                                                                                                                                                                                                                                                                                             | A203 |
| A* 02:15Ne, 02:32Ne, 02:43Ne, 02:82Ne, 02:83Ne, 02:88Ne, 02:94Ne, 02:113:01Ne, 02:113:02Ne, 02:125Ne                                                                                                                                                                                                                                                                                                                                                                                                                                                                                                                                                                                                                                                                                                                                                                                                                                                                                                                                                                                                                                                                                                                                                                                                                                                                                                                                                                                                                                                                                                                                                                                                                                                                                                                                                                                                                                                                                               | -                                                                                                                                                                                                                                                                                                                                                  | Null |
| <b>A* 02:30:01</b> , 02:30:02e, 02:40:01e, 02:40:02e, 02:56:01e, <b>02:60:01</b> , 02:60:02e, <b>02:64:01d</b> , 02:64:02e, 02:69e, 02:75e, 02:76:01e, <b>02:86:01d</b> , 02:86:02e, <b>02:93:01d</b> , 02:93:02e, 02:99:01e, 02:99:02e, 02:101:01e, 02:101:02e, 02:104e, 02:126e, <b>02:131:01:01d</b> , 02:131:01:02e, 02:131:01:03e, 02:131:02e, 02:132e, 02:134e, 02:140e, 02:150:01e, 02:150:02e, 02:153:01e, 02:153:02e, 02:157:01e, 02:157:02e, 02:164:01e, 02:164:02e, 02:179e, 02:197:01e, 02:197:02e, 02:211:01e, 02:211:02e, 02:217:01e, 02:217:02e, 02:233:01e, 02:233:02e, 02:241e, 02:243:01e, 02:252e, 02:256e, 02:265e, 02:266e, 02:289:01e, 02:289:02e, 02:291e, 02:294e, 02:324e, 02:327e, 02:329e, 02:357e, 02:397e, 02:411e, 02:419:01e, 02:419:02e, 02:426e, 02:428e, 02:446e, 02:452e, 02:455e, 02:469e, 02:481e, 02:524:01e, 02:524:02e, 02:528:01e, 02:538e, 02:559e, 02:570:02e, 02:591:02e, 02:607e, 02:610:01e, 02:610:02e, 02:614e, 02:619:01e, 02:619:02e, 02:625e, 02:629e, 02:642e, 02:648:01e, 02:648:02e, 02:664e, 02:665e, 02:683e, 02:685e, 02:686e, 02:687e, 02:688:01e, 02:688:02e, 02:689e, 02:690e, 02:692e, 02:704e, 02:716e, 02:717e, 02:718e, 02:719e, 02:720e, 02:722e, 02:724e, 02:726e, 02:737e, 02:739e, 02:740e, 02:742e, 02:744e, 02:751e, 02:753e, 02:755e, 02:759e, 02:761e, 02:762e, 02:763e, 02:765e, 02:767e, 02:768e, 02:776e, 02:779e, 02:780e, 02:786e, 02:794e, 02:795Qe, 02:810e, 02:812e, 02:818e, 02:819e, 02:820e, 02:821e, 02:822e, 02:823e, 02:824e, 02:825e, 02:830e, 02:834e, 02:836e, 02:839e, 02:844e, 02:846e, 02:851e, 02:852e, 02:853e, 02:857e, 02:862e, 02:863e, 02:864:01:01e, 02:864:01:02e, 02:865e, 02:866e, 02:867e, 02:868e, 02:869e, 02:870e, 02:874e, 02:875e, 02:877e, 02:878e, 02:884e, 02:888e, 02:891e, 02:893e, 02:894e, 02:898e, 02:899e, 02:916e, 02:917e, 02:919e, 02:922e, 02:924e, 02:925e, 02:926e, 02:928e, 02:929e, 02:930e, 02:935e, 02:939e, 02:940e, 02:942e, 02:950e, 02:951e                     | 02:01P<br>02:02P<br>02:04P<br>02:05P<br>02:06P<br>02:07P<br>02:11P<br>02:14P<br>02:16P<br>02:22P<br>02:29P<br>02:30P<br>02:40P<br>02:49P<br>02:56P<br>02:60P<br>02:64P<br>02:76P<br>02:86P<br>02:93P<br>02:99P<br>02:101P<br>02:150P<br>02:153P<br>02:157P<br>02:164P<br>02:197P<br>02:211P<br>02:217P<br>02:233P<br>02:243P<br>02:289P<br>02:419P | -    |

02:524P  
02:528P  
02:570P  
02:591P  
02:610P  
02:619P  
02:648P  
02:688P

A\* 02:19d, 02:26e, 02:27d, 02:28e, 02:36d, 02:37e, 02:44d, 02:45d, 02:47e, 02:51e, 02:52e, 02:54e, 02:57e, 02:58d, 02:61e, 02:62e, 02:63d, 02:80e, 02:84d, 02:85d, 02:91e, 02:92e, 02:96d, 02:102e, 02:106e, 02:107e, 02:108e, 02:109e, 02:110e, 02:111e, 02:114e, 02:115e, 02:116e, 02:117e, 02:118e, 02:119d, 02:120e, 02:121e, 02:123d, 02:127e, 02:128e, 02:130e, 02:133e, 02:137d, 02:138e, 02:139e, 02:141e, 02:142e, 02:143e, 02:144e, 02:145e, 02:146e, 02:147e, 02:149e, 02:151e, 02:152e, 02:154e, 02:155e, 02:158e, 02:159e, 02:160e, 02:161e, 02:162e, 02:163e, 02:165e, 02:166e, 02:167e, 02:168e, 02:170e, 02:172e, 02:173e, 02:174e, 02:175e, 02:176e, 02:177e, 02:178e, 02:180e, 02:181e, 02:182e, 02:183e, 02:184e, 02:186e, 02:187e, 02:188e, 02:189e, 02:190e, 02:191e, 02:192e, 02:193e, 02:194e, 02:196e, 02:198e, 02:199e, 02:200e, 02:201e, 02:202e, 02:203e, 02:204e, 02:205e, 02:206e, 02:207e, 02:208e, 02:209e, 02:210e, 02:212e, 02:213e, 02:214e, 02:215e, 02:216e, 02:218e, 02:219e, 02:220e, 02:221e, 02:222Ne, 02:223Ne, 02:224e, 02:225Ne, 02:226Ne, 02:227Ne, 02:228e, 02:229e, 02:231e, 02:232e, 02:234e, 02:235e, 02:236e, 02:238e, 02:239e, 02:240e, 02:246e, 02:247e, 02:248e, 02:249e, 02:250Ne, 02:251e, 02:254e, 02:255e, 02:257e, 02:259e, 02:260e, 02:261e, 02:262e, 02:263e, 02:267e, 02:268e, 02:269e, 02:270e, 02:271e, 02:272e, 02:273e, 02:274e, 02:275e, 02:276e, 02:277e, 02:278e, 02:279e, 02:282e, 02:283e, 02:284Ne, 02:285e, 02:286e, 02:287e, 02:288e, 02:290e, 02:292e, 02:293Qe, 02:295e, 02:296e, 02:297e, 02:298e, 02:299e, 02:300e, 02:301Ne, 02:302e, 02:303e, 02:304e, 02:305Ne, 02:306e, 02:307e, 02:308e, 02:310e, 02:311e, 02:312e, 02:313e, 02:314Ne, 02:316e, 02:317e, 02:318e, 02:319e, 02:320e, 02:321Ne, 02:322e, 02:323e, 02:325e, 02:326e, 02:328e, 02:330e, 02:331e, 02:332e, 02:333e, 02:335e, 02:336e, 02:337e, 02:339e, 02:340e, 02:341e, 02:342e, 02:343e, 02:344e, 02:346e, 02:347e, 02:348e, 02:349e, 02:350Ne, 02:351e, 02:352e, 02:353e, 02:354e, 02:356Ne, 02:358e, 02:359e, 02:360e, 02:361e, 02:362e, 02:363e, 02:364e, 02:365e, 02:366Ne, 02:367e, 02:368e, 02:369e, 02:371e, 02:372e, 02:373Ne, 02:374e, 02:375e, 02:376e, 02:377e, 02:378e, 02:379e, 02:380e, 02:381e, 02:382e, 02:383e, 02:384e, 02:385e, 02:386e, 02:387e, 02:388e, 02:389e, 02:390e, 02:391e, 02:392e, 02:393e, 02:394e, 02:395Ne, 02:396e, 02:399e, 02:400e, 02:401e, 02:402e, 02:403e, 02:404e, 02:405e, 02:406e, 02:407e, 02:408e, 02:409e, 02:410e, 02:413e, 02:414e, 02:415e, 02:416e, 02:417e, 02:418e, 02:420e, 02:421e, 02:422e, 02:423e, 02:424e, 02:425e, 02:429e, 02:430e, 02:432e, 02:433e, 02:434e, 02:435e, 02:436e, 02:437Qe, 02:438e, 02:439Ne, 02:440Qe, 02:441e, 02:442e, 02:443e, 02:444e, 02:445e, 02:448e, 02:449e, 02:450e, 02:451e, 02:456e, 02:457e, 02:458e, 02:459e, 02:460e, 02:461e, 02:462e, 02:464e, 02:465e, 02:467e, 02:468:01Ne, 02:468:02Ne, 02:470e, 02:471e, 02:472e, 02:473e, 02:474e, 02:475e, 02:476Ne, 02:477e, 02:478e, 02:479e, 02:482e, 02:483e, 02:484e, 02:485e, 02:486e, 02:487e, 02:488e, 02:489e, 02:490Ne, 02:491e, 02:492e, 02:493e, 02:494e, 02:495e, 02:496e, 02:497e, 02:498e, 02:499e, 02:500Qe, 02:501Ne, 02:502e, 02:503e, 02:506Ne, 02:507e, 02:508e, 02:509e, 02:510e, 02:511e, 02:512e, 02:513e, 02:514Ne, 02:515e, 02:516Ne, 02:517e, 02:518e, 02:519e, 02:520e, 02:521e, 02:522e, 02:523e, 02:525Ne, 02:526e, 02:527e, 02:530e, 02:531e, 02:532e, 02:533e, 02:534e, 02:535e, 02:536e, 02:537e, 02:539e, 02:540Ne, 02:541e, 02:542e, 02:543e, 02:545e, 02:546e, 02:547e, 02:548e, 02:549e, 02:550e, 02:551e, 02:552e, 02:553e, 02:554e, 02:555e, 02:556e, 02:558e, 02:560e, 02:561e, 02:562e, 02:563e, 02:564e, 02:565e, 02:566e, 02:567e, 02:569e, 02:572e, 02:573e, 02:574e, 02:575e, 02:576e, 02:577e, 02:578e, 02:579e, 02:581Qe, 02:582e, 02:583e, 02:584e, 02:585e, 02:586e, 02:587e, 02:588e, 02:589e, 02:590e, 02:592e, 02:593e, 02:594e, 02:595e, 02:596e, 02:597e, 02:598e, 02:599e, 02:600e, 02:602e, 02:603e, 02:605Qe, 02:606e, 02:608Ne, 02:609e, 02:611e, 02:613e, 02:615e, 02:616e, 02:617e, 02:618Qe, 02:620e, 02:621e, 02:622Ne, 02:623e, 02:624e, 02:626e, 02:627e, 02:631e, 02:632e, 02:635e, 02:636e, 02:637e, 02:638e, 02:639e, 02:640e, 02:643Ne, 02:645e, 02:646e, 02:647e, 02:649e, 02:650e, 02:651e, 02:652e, 02:653e, 02:654e, 02:655e, 02:656e, 02:657e, 02:658e, 02:659e, 02:660e, 02:661e, 02:662e, 02:663e, 02:667e, 02:668e, 02:669e, 02:670e, 02:671e, 02:672Qe, 02:673e, 02:674e, 02:675Ne, 02:676e, 02:677e, 02:678e, 02:679e, 02:680e,

-

02:681e, 02:682e, 02:691Ne, 02:693e, 02:694e, 02:695e, 02:696Ne, 02:697e, 02:698e, 02:699e, 02:700e, 02:701e, 02:702e, 02:703e, 02:705e, 02:706e, 02:707e, 02:708e, 02:709e, 02:710Ne, 02:712e, 02:713e, 02:714e, 02:715Ne, 02:721e, 02:723e, 02:725e, 02:727e, 02:728Qe, 02:729e, 02:730e, 02:731e, 02:732e, 02:733e, 02:734e, 02:735e, 02:736e, 02:738e, 02:743e, 02:745e, 02:746e, 02:747e, 02:748Ne, 02:749e, 02:750e, 02:752e, 02:754e, 02:756e, 02:757e, 02:758e, 02:760Ne, 02:764e, 02:766e, 02:769e, 02:770e, 02:771e, 02:772e, 02:773Ne, 02:777e, 02:778e, 02:781e, 02:782e, 02:783e, 02:784e, 02:785e, 02:787e, 02:788Ne, 02:789Ne, 02:790e, 02:791Ne, 02:792Ne, 02:793Ne, 02:796Ne, 02:797Ne, 02:798e, 02:799e, 02:800e, 02:801e, 02:802e, 02:803Ne, 02:805Qe, 02:806Ne, 02:807Ne, 02:808e, 02:811e, 02:813e, 02:814e, 02:816e, 02:817e, 02:826Qe, 02:827Qe, 02:828e, 02:831Ne, 02:832Ne, 02:835e, 02:837e, 02:838e, 02:840e, 02:841e, 02:842e, 02:843e, 02:845e, 02:847e, 02:848e, 02:855e, 02:856e, 02:858Ne, 02:859e, 02:861e, 02:871Ne, 02:872e, 02:873e, 02:876e, 02:879Ne, 02:880Ne, 02:881e, 02:882e, 02:883e, 02:885e, 02:886e, 02:887Ne, 02:889e, 02:892e, 02:895Ne, 02:896Ne, 02:897e, 02:900e, 02:901e, 02:902e, 02:903e, 02:904e, 02:905e, 02:906e, 02:908e, 02:909e, 02:910e, 02:911e, 02:912e, 02:913e, 02:915Ne, 02:918e, 02:920e, 02:921e, 02:923e, 02:931e, 02:932e, 02:933e, 02:934e, 02:936Ne, 02:937e, 02:938e, 02:941e, 02:943e, 02:944e, 02:945Ne, 02:946Ne, 02:947e, 02:948e, 02:953e, 02:954e

**A\*02**

17 common  
1319 rare

**A\* 02:01:01:01**, 02:01:01:02Le, 02:01:01:03e, 02:01:01:04e, 02:01:01:05e, 02:01:01:06e, 02:01:01:07e, 02:01:01:08e, 02:01:01:09e, 02:01:01:10e, 02:01:01:11e, 02:01:01:12e, 02:01:01:13e, 02:01:01:14e, 02:01:01:15e, 02:01:01:16e, 02:01:01:17e, 02:01:01:18e, 02:01:01:19e, 02:01:01:20e, 02:01:01:21e, 02:01:01:22e, 02:01:01:23e, 02:01:01:24e, 02:01:01:25e, 02:01:01:26e, 02:01:01:27e, 02:01:01:28e, 02:01:01:29e, 02:01:01:30e, 02:01:01:31e, 02:01:01:32e, 02:01:01:33e, 02:01:01:34e, 02:01:01:35e, 02:01:01:36e, 02:01:01:37e, 02:01:01:38e, 02:01:01:39e, 02:01:01:40e, 02:01:01:41e, 02:01:01:42e, 02:01:01:43e, 02:01:01:44e, 02:01:01:45e, 02:01:01:46e, 02:01:01:47e, 02:01:01:48e, 02:01:01:49e, 02:01:01:50e, 02:01:01:51e, 02:01:01:52e, 02:01:01:53e, 02:01:01:54e, 02:01:01:55e, 02:01:01:56e, 02:01:01:57e, 02:01:01:58e, 02:01:01:59e, 02:01:01:60e, 02:01:01:61e, 02:01:01:62e, 02:01:01:63e, 02:01:01:64e, 02:01:01:65e, 02:01:01:66e, 02:01:01:67e, 02:01:01:68e, 02:01:01:69e, 02:01:01:70e, 02:01:01:71e, 02:01:01:72e, 02:01:01:73e, 02:01:01:74e, 02:01:01:75e, 02:01:01:76e, 02:01:01:77e, 02:01:01:78e, 02:01:01:79e, 02:01:01:80e, 02:01:01:81e, 02:01:01:82e, 02:01:01:83e, 02:01:01:84e, 02:01:01:85e, 02:01:01:86e, 02:01:01:87e, 02:01:01:88e, 02:01:01:89e, 02:01:01:90e, 02:01:01:91e, 02:01:01:92e, 02:01:01:93e, 02:01:01:94e, 02:01:01:95e, 02:01:01:96e, 02:01:01:97e, 02:01:01:98e, 02:01:01:99e, 02:01:01:100e, 02:01:01:101e, 02:01:01:102e, 02:01:01:103e, 02:01:01:104e, 02:01:01:105e, 02:01:01:106e, 02:01:01:107e, 02:01:01:108e, 02:01:01:109e, 02:01:01:110e, 02:01:01:111e, 02:01:01:112e, 02:01:01:113e, 02:01:01:114e, 02:01:01:115e, 02:01:01:116e, 02:01:01:117e, 02:01:01:118e, 02:01:01:119e, 02:01:01:120e, 02:01:01:121e, 02:01:01:122e, 02:01:01:123e, 02:01:01:124e, 02:01:01:125e, 02:01:01:126e, 02:01:01:127e, 02:01:01:128e, 02:01:01:129e, 02:01:01:130e, 02:01:01:131e, 02:01:01:132e, 02:01:01:133e, 02:01:01:134Qe, 02:01:01:135e, 02:01:01:136e, 02:01:01:137e, 02:01:01:138e, 02:01:01:139e, 02:01:01:140e, 02:01:01:141e, 02:01:01:142e, 02:01:01:143e, 02:01:01:144e, 02:01:01:145e, 02:01:01:146e, 02:01:01:147e, 02:01:01:148e, 02:01:01:149e, 02:01:01:150e, 02:01:01:151e, 02:01:01:152e, 02:01:01:153e, 02:01:01:154e, 02:01:01:155e, 02:01:01:156e, 02:01:01:157e, 02:01:01:158e, 02:01:01:159e, 02:01:01:160e, 02:01:01:161e, 02:01:01:162e, 02:01:01:163e, 02:01:01:164e, 02:01:01:165e, 02:01:01:166e, 02:01:01:167e, 02:01:01:168e, 02:01:01:169e, 02:01:02:01e, 02:01:02:02e, 02:01:03e, **02:01:04**, 02:01:05e, 02:01:06e, 02:01:07e, 02:01:08e, 02:01:09e, 02:01:10e, 02:01:11e, 02:01:12e, 02:01:13e, 02:01:14Qe, 02:01:15e, 02:01:17e, 02:01:18e, 02:01:19e, 02:01:21e, 02:01:22e, 02:01:23e, 02:01:24e, 02:01:25e, 02:01:26e, 02:01:27e, 02:01:28e, 02:01:29e, 02:01:30e, 02:01:31e, 02:01:32e, 02:01:33e, 02:01:34e, 02:01:35e, 02:01:37e, 02:01:38e, 02:01:39e, 02:01:40e, 02:01:41e, 02:01:42e, 02:01:43e, 02:01:44e, 02:01:45e, 02:01:46e, 02:01:47e, 02:01:48e, 02:01:49e, 02:01:50e, 02:01:51e, 02:01:52e, 02:01:53e, 02:01:54e, 02:01:55e, 02:01:56e, 02:01:57e, 02:01:58e, 02:01:59e, 02:01:60e, 02:01:61e, 02:01:62e, 02:01:63e, 02:01:64e, 02:01:65e, 02:01:66e, 02:01:67e, 02:01:68e, 02:01:69e, 02:01:70e, 02:01:71e, 02:01:72e, 02:01:73e, 02:01:74e, 02:01:75e, 02:01:76e, 02:01:77e, 02:01:78e, 02:01:79e, 02:01:80e, 02:01:81e,

02:01P  
02:02P  
02:04P  
02:05P  
02:06P  
02:07P  
02:11P  
02:14P  
02:16P  
02:17P  
02:20P  
02:22P  
02:24P  
02:29P  
02:42P  
02:49P  
02:74P  
02:79P

**A2**



02:01:83e, 02:01:84e, 02:01:85e, 02:01:86e, 02:01:87e, 02:01:88e, 02:01:89e, 02:01:90e, 02:01:91e, 02:01:92e, 02:01:93e, 02:01:94e, 02:01:95e, 02:01:96e, 02:01:97e, 02:01:98e, 02:01:99e, 02:01:100e, 02:01:101e, 02:01:102e, 02:01:103e, 02:01:104e, 02:01:105e, 02:01:106e, 02:01:107e, 02:01:108e, 02:01:109e, 02:01:110e, 02:01:111e, 02:01:112e, 02:01:113e, 02:01:114e, 02:01:115e, 02:01:116e, 02:01:117e, 02:01:118e, 02:01:119e, 02:01:120e, 02:01:121e, 02:01:122e, 02:01:123e, 02:01:124e, 02:01:125e, 02:01:126e, 02:01:127e, 02:01:128e, 02:01:129e, 02:01:130e, 02:01:131e, 02:01:132e, 02:01:133e, 02:01:134e, 02:01:135e, 02:01:136e, 02:01:137e, 02:01:138e, 02:01:139e, 02:01:140e, 02:01:141e, 02:01:142e, 02:01:143e, 02:01:144e, 02:01:145e, 02:01:146e, 02:01:147e, 02:01:148e, 02:01:149e, 02:01:150e, 02:01:151e, 02:01:152e, 02:01:153e, 02:01:154e, 02:01:155e, 02:01:156e, 02:01:157e, 02:01:158e, 02:01:159e, 02:01:160e, 02:01:161e, 02:01:162e, 02:01:163e, 02:01:164e, 02:01:166e, 02:01:167e, 02:01:168e, 02:01:169e, 02:01:170e, 02:01:171e, 02:01:172e, 02:01:173e, 02:01:174e, 02:01:175e, 02:01:176e, 02:01:177e, 02:01:178e, 02:01:179e, 02:01:180e, 02:01:181e, 02:01:182e, 02:01:183e, 02:01:184e, 02:01:185e, 02:01:186e, 02:01:187e, 02:01:188e, 02:01:189e, 02:01:190e, 02:01:191e, **02:02:01:01**, 02:02:01:02e, 02:02:01:03e, 02:02:01:04e, 02:02:01:05e, 02:02:01:06e, 02:02:01:07e, 02:02:01:08e, 02:02:02e, 02:02:03e, 02:02:04e, 02:02:05e, 02:02:06e, **02:04**, **02:05:01:01**, 02:05:01:02e, 02:05:01:03e, 02:05:01:04e, 02:05:01:05e, 02:05:01:06e, 02:05:01:07e, 02:05:01:08e, 02:05:01:09e, 02:05:01:10e, 02:05:01:11e, 02:05:01:12e, 02:05:01:13e, 02:05:02e, 02:05:03e, 02:05:04e, 02:05:05e, 02:05:06e, 02:05:07e, 02:05:08e, 02:05:09e, 02:05:11e, 02:05:12e, **02:06:01:01**, 02:06:01:02e, 02:06:01:03e, 02:06:01:04e, 02:06:01:05e, 02:06:01:06e, 02:06:01:07e, 02:06:01:08e, 02:06:01:09e, 02:06:01:10e, 02:06:01:11e, 02:06:01:12e, 02:06:02e, 02:06:03e, 02:06:04e, 02:06:05e, 02:06:06e, 02:06:07e, 02:06:08e, 02:06:09e, 02:06:10e, 02:06:11e, 02:06:12e, 02:06:13e, 02:06:14e, 02:06:15e, 02:06:16e, 02:06:17e, 02:06:18e, 02:06:19e, 02:06:20e, 02:06:21e, 02:06:22e, 02:06:23e, 02:06:24e, 02:06:25e, 02:06:26e, 02:06:27e, 02:06:28e, 02:06:29e, 02:06:30e, **02:07:01:01**, 02:07:01:02e, 02:07:02e, 02:07:03e, 02:07:04e, 02:07:05e, 02:07:06e, 02:07:07e, 02:07:08e, 02:07:09e, 02:07:10e, 02:07:11e, 02:07:12e, 02:07:13e, 02:07:14e, 02:07:15e, 02:07:16e, 02:07:17e, 02:07:18e, 02:07:19e, **02:09:01:01**, 02:09:01:02e, 02:09:01:03e, **02:11:01:01**, 02:11:01:02e, 02:11:01:03e, 02:11:02e, 02:11:03e, 02:11:04e, 02:11:05e, 02:11:06e, 02:11:07e, 02:11:08e, 02:11:09e, **02:14**, **02:16d**, **02:17:02:01**, 02:17:02:02e, 02:17:03e, 02:17:04e, **02:20:01**, 02:20:02e, **02:22:01:01**, 02:22:01:02e, 02:22:02e, **02:24:01**, 02:24:02e, **02:29d**, 02:42:01e, 02:42:02e, **02:49:01d**, 02:49:02e, 02:66e, **02:74:01d**, 02:74:02e, 02:79:01e, 02:89:01e, 02:89:02e, 02:97:01e, 02:97:02e

|                                                                                                                                                                                                                                                                                                                                                                                                                                                                                                                                                                                                                                                                                                                                                                                                                                                                                                                                                                                                                                                                                                                                                                                                                                                                                                                                                                                                                                                                                                  |                                                                                                                                                                                                          |      |
|--------------------------------------------------------------------------------------------------------------------------------------------------------------------------------------------------------------------------------------------------------------------------------------------------------------------------------------------------------------------------------------------------------------------------------------------------------------------------------------------------------------------------------------------------------------------------------------------------------------------------------------------------------------------------------------------------------------------------------------------------------------------------------------------------------------------------------------------------------------------------------------------------------------------------------------------------------------------------------------------------------------------------------------------------------------------------------------------------------------------------------------------------------------------------------------------------------------------------------------------------------------------------------------------------------------------------------------------------------------------------------------------------------------------------------------------------------------------------------------------------|----------------------------------------------------------------------------------------------------------------------------------------------------------------------------------------------------------|------|
| <p><b>A* 02:08</b>, 02:12d, 02:13d, 02:18d, 02:21d, 02:25d, 02:31e, 02:34d, 02:41e, 02:59e, 02:67e, 02:68e, 02:70e, 02:71e, 02:72e, 02:77e, 02:90e, 02:105e</p>                                                                                                                                                                                                                                                                                                                                                                                                                                                                                                                                                                                                                                                                                                                                                                                                                                                                                                                                                                                                                                                                                                                                                                                                                                                                                                                                  | -                                                                                                                                                                                                        |      |
| <p>A* 02:03:05e</p>                                                                                                                                                                                                                                                                                                                                                                                                                                                                                                                                                                                                                                                                                                                                                                                                                                                                                                                                                                                                                                                                                                                                                                                                                                                                                                                                                                                                                                                                              | 02:03P                                                                                                                                                                                                   | A203 |
| <p>A* 02:15Ne, 02:32Ne, 02:43Ne, 02:82Ne, 02:83Ne, 02:88Ne, 02:94Ne, 02:113:01Ne, 02:113:02Ne, 02:125Ne</p>                                                                                                                                                                                                                                                                                                                                                                                                                                                                                                                                                                                                                                                                                                                                                                                                                                                                                                                                                                                                                                                                                                                                                                                                                                                                                                                                                                                      | -                                                                                                                                                                                                        | Null |
| <p><b>A* 02:30:01</b>, 02:30:02e, 02:40:01e, 02:40:02e, 02:56:01e, 02:56:02e, <b>02:60:01</b>, 02:60:02e, <b>02:64:01d</b>, 02:69e, 02:75e, 02:76:01e, 02:76:02e, <b>02:86:01d</b>, 02:99:01e, 02:99:02e, 02:101:01e, 02:101:02e, 02:104e, 02:126e, <b>02:131:01:01d</b>, 02:131:01:02e, 02:131:01:03e, 02:131:02e, 02:132e, 02:134e, 02:140e, 02:150:01e, 02:150:02e, 02:153:01e, 02:153:02e, 02:157:01e, 02:157:02e, 02:164:01e, 02:164:02e, 02:179e, 02:197:01e, 02:197:02e, 02:211:01e, 02:211:02e, 02:217:01e, 02:217:02e, 02:233:01e, 02:233:02e, 02:241e, 02:243:01e, 02:243:02e, 02:243:03e, 02:252e, 02:256e, 02:265e, 02:266e, 02:289:01e, 02:289:02e, 02:291e, 02:294e, 02:324e, 02:327e, 02:329e, 02:357e, 02:397e, 02:411e, 02:419:01e, 02:419:02e, 02:426e, 02:428e, 02:446e, 02:452e, 02:455e, 02:469e, 02:481e, 02:524:01e, 02:528:01e, 02:528:02e, 02:538e, 02:559e, 02:570:01e, 02:570:02e, 02:591:01e, 02:591:02e, 02:607e, 02:610:01e, 02:610:02e, 02:614e, 02:619:02e, 02:625e, 02:629e, 02:642e, 02:648:01e, 02:648:02e, 02:664e, 02:665e, 02:683e, 02:685e, 02:686e, 02:687e, 02:688:01e, 02:688:02e, 02:689e, 02:690e, 02:692e, 02:704e, 02:716e, 02:717e, 02:718e, 02:719e, 02:720e, 02:722e, 02:724e, 02:726e, 02:737e, 02:739e, 02:740e, 02:742e, 02:744e, 02:751e, 02:753e, 02:755e, 02:759e, 02:761e, 02:762e, 02:763e, 02:765e, 02:767e, 02:768e, 02:776e, 02:779e, 02:780e, 02:786e, 02:794e, 02:795Qe, 02:810e, 02:812e, 02:818e, 02:819e, 02:820e, 02:821e,</p> | <p>02:01P<br/>02:02P<br/>02:04P<br/>02:05P<br/>02:06P<br/>02:07P<br/>02:11P<br/>02:14P<br/>02:16P<br/>02:22P<br/>02:29P<br/>02:30P<br/>02:40P<br/>02:49P<br/>02:56P<br/>02:60P<br/>02:64P<br/>02:76P</p> | -    |

02:822e, 02:823e, 02:824e, 02:825e, 02:830e, 02:834e, 02:836e, 02:839e, 02:844e, 02:846e, 02:851e, 02:852e, 02:853e, 02:857e, 02:862e, 02:863e, 02:864:01:01e, 02:864:01:02e, 02:865e, 02:866e, 02:867e, 02:868e, 02:869e, 02:870e, 02:874e, 02:875e, 02:877e, 02:878e, 02:884e, 02:888e, 02:891e, 02:893e, 02:894e, 02:898e, 02:899e, 02:916e, 02:917e, 02:919e, 02:922e, 02:924e, 02:925e, 02:926e, 02:928e, 02:929e, 02:930e, 02:935e, 02:939e, 02:940e, 02:942e, 02:950e, 02:951e

02:86P  
02:99P  
02:101P  
02:150P  
02:153P  
02:157P  
02:164P  
02:197P  
02:211P  
02:217P  
02:233P  
02:243P  
02:289P  
02:419P  
02:524P  
02:528P  
02:570P  
02:591P  
02:610P  
02:619P  
02:648P  
02:688P

A\* 02:26e, 02:27d, 02:28e, 02:36d, 02:37e, 02:44d, 02:45d, 02:47e, 02:51e, 02:54e, 02:57e, 02:58d, 02:61e, 02:62e, 02:63d, 02:80e, 02:84d, 02:85d, 02:91e, 02:92e, 02:96d, 02:102e, 02:103e, 02:106e, 02:107e, 02:108e, 02:109e, 02:111e, 02:115e, 02:116e, 02:118e, 02:119d, 02:120e, 02:121e, 02:123d, 02:127e, 02:128e, 02:130e, 02:133e, 02:137d, 02:138e, 02:139e, 02:141e, 02:142e, 02:143e, 02:144e, 02:145e, 02:146e, 02:147e, 02:149e, 02:151e, 02:154e, 02:155e, 02:158e, 02:159e, 02:160e, 02:161e, 02:162e, 02:163e, 02:165e, 02:166e, 02:167e, 02:168e, 02:169e, 02:170e, 02:172e, 02:173e, 02:174e, 02:175e, 02:176e, 02:177e, 02:178e, 02:180e, 02:181e, 02:182e, 02:183e, 02:184e, 02:185e, 02:186e, 02:187e, 02:188e, 02:189e, 02:190e, 02:191e, 02:192e, 02:193e, 02:194e, 02:195e, 02:196e, 02:198e, 02:199e, 02:200e, 02:201e, 02:202e, 02:203e, 02:204e, 02:205e, 02:206e, 02:207e, 02:208e, 02:209e, 02:210e, 02:212e, 02:213e, 02:214e, 02:215e, 02:216e, 02:218e, 02:219e, 02:220e, 02:221e, 02:222Ne, 02:223Ne, 02:224e, 02:225Ne, 02:226Ne, 02:227Ne, 02:228e, 02:229e, 02:231e, 02:232e, 02:234e, 02:235e, 02:236e, 02:238e, 02:239e, 02:240e, 02:246e, 02:247e, 02:248e, 02:249e, 02:250Ne, 02:251e, 02:254e, 02:255e, 02:257e, 02:259e, 02:260e, 02:261e, 02:262e, 02:263e, 02:267e, 02:268e, 02:269e, 02:270e, 02:271e, 02:272e, 02:273e, 02:274e, 02:275e, 02:276e, 02:277e, 02:278e, 02:283e, 02:284Ne, 02:285e, 02:286e, 02:287e, 02:288e, 02:290e, 02:292e, 02:293Qe, 02:295e, 02:296e, 02:297e, 02:298e, 02:299e, 02:301Ne, 02:302e, 02:303e, 02:305Ne, 02:306e, 02:307e, 02:308e, 02:310e, 02:311e, 02:312e, 02:313e, 02:314Ne, 02:316e, 02:317e, 02:318e, 02:319e, 02:320e, 02:321Ne, 02:322e, 02:323e, 02:325e, 02:326e, 02:328e, 02:330e, 02:331e, 02:332e, 02:333e, 02:335e, 02:336e, 02:337e, 02:340e, 02:341e, 02:342e, 02:343e, 02:344e, 02:346e, 02:347e, 02:348e, 02:349e, 02:350Ne, 02:351e, 02:352e, 02:353e, 02:354e, 02:356Ne, 02:358e, 02:359e, 02:360e, 02:361e, 02:362e, 02:363e, 02:364e, 02:365e, 02:366Ne, 02:367e, 02:368e, 02:369e, 02:371e, 02:372e, 02:373Ne, 02:374e, 02:375e, 02:376e, 02:377e, 02:378e, 02:379e, 02:380e, 02:381e, 02:382e, 02:383e, 02:384e, 02:385e, 02:386e, 02:387e, 02:388e, 02:389e, 02:390e, 02:391e, 02:392e, 02:393e, 02:394e, 02:395Ne, 02:396e, 02:399e, 02:400e, 02:401e, 02:402e, 02:403e, 02:404e, 02:405e, 02:406e, 02:407e, 02:408e, 02:410e, 02:413e, 02:414e, 02:415e, 02:416e, 02:417e, 02:418e, 02:420e, 02:421e, 02:422e, 02:423e, 02:424e, 02:425e, 02:429e, 02:430e, 02:432e, 02:433e, 02:434e, 02:435e, 02:436e, 02:437Qe, 02:438e, 02:439Ne, 02:440Qe, 02:441e, 02:442e, 02:443e, 02:444e, 02:445e, 02:448e, 02:449e, 02:450e, 02:451e, 02:456e, 02:457e, 02:458e, 02:459e, 02:460e, 02:461e, 02:462e, 02:464e, 02:465e, 02:467e, 02:468:01Ne, 02:468:02Ne, 02:470e, 02:471e, 02:472e, 02:473e, 02:474e, 02:475e, 02:476Ne, 02:477e, 02:478e, 02:479e, 02:482e, 02:483e, 02:484e, 02:485e, 02:486e, 02:487e, 02:488e, 02:489e, 02:490Ne, 02:491e, 02:492e, 02:493e, 02:494e, 02:495e, 02:496e, 02:497e, 02:498e, 02:499e, 02:500Qe, 02:501Ne, 02:502e, 02:503e, 02:504e, 02:506Ne, 02:507e, 02:508e, 02:509e, 02:510e, 02:511e, 02:512e, 02:513e, 02:514Ne, 02:515e, 02:516Ne, 02:517e, 02:518e, 02:519e, 02:520e, 02:521e, 02:522e, 02:523e, 02:525Ne, 02:526e, 02:530e, 02:531e, 02:532e, 02:533e, 02:534e, 02:535e, 02:536e, 02:537e, 02:539e, 02:540Ne, 02:541e, 02:542e,

-

02:543e, 02:545e, 02:546e, 02:547e, 02:548e, 02:549e, 02:550e, 02:551e, 02:552e, 02:553e, 02:554e, 02:555e, 02:556e, 02:558e, 02:560e, 02:561e, 02:562e, 02:563e, 02:564e, 02:565e, 02:566e, 02:567e, 02:569e, 02:572e, 02:573e, 02:574e, 02:575e, 02:576e, 02:577e, 02:578e, 02:579e, 02:581Qe, 02:583e, 02:584e, 02:585e, 02:586e, 02:587e, 02:588e, 02:589e, 02:590e, 02:592e, 02:593e, 02:595e, 02:596e, 02:597e, 02:598e, 02:599e, 02:600e, 02:601e, 02:602e, 02:603e, 02:605Qe, 02:606e, 02:608Ne, 02:609e, 02:611e, 02:613e, 02:615e, 02:616e, 02:617e, 02:618Qe, 02:620e, 02:621e, 02:622Ne, 02:623e, 02:624e, 02:626e, 02:627e, 02:632e, 02:635e, 02:636e, 02:637e, 02:638e, 02:639e, 02:640e, 02:643Ne, 02:645e, 02:646e, 02:647e, 02:649e, 02:650e, 02:652e, 02:653e, 02:654e, 02:655e, 02:656e, 02:657e, 02:658e, 02:659e, 02:660e, 02:661e, 02:662e, 02:663e, 02:667e, 02:668e, 02:669e, 02:670e, 02:671e, 02:672Qe, 02:673e, 02:674e, 02:675Ne, 02:676e, 02:677e, 02:678e, 02:679e, 02:680e, 02:682e, 02:691Ne, 02:693e, 02:694e, 02:695e, 02:696Ne, 02:697e, 02:698e, 02:699e, 02:700e, 02:701e, 02:702e, 02:703e, 02:705e, 02:706e, 02:707e, 02:708e, 02:709e, 02:710Ne, 02:712e, 02:713e, 02:714e, 02:715Ne, 02:721e, 02:725e, 02:727e, 02:728Qe, 02:729e, 02:730e, 02:731e, 02:732e, 02:733e, 02:734e, 02:735e, 02:736e, 02:738e, 02:745e, 02:746e, 02:747e, 02:748Ne, 02:749e, 02:750e, 02:752e, 02:754e, 02:756e, 02:757e, 02:758e, 02:760Ne, 02:764e, 02:766e, 02:769e, 02:770e, 02:771e, 02:772e, 02:773Ne, 02:777e, 02:778e, 02:781e, 02:782e, 02:783e, 02:785e, 02:787e, 02:788Ne, 02:789Ne, 02:791Ne, 02:792Ne, 02:793Ne, 02:796Ne, 02:797Ne, 02:798e, 02:799e, 02:800e, 02:801e, 02:802e, 02:803Ne, 02:805Qe, 02:806Ne, 02:807Ne, 02:808e, 02:811e, 02:813e, 02:814e, 02:816e, 02:817e, 02:826Qe, 02:827Qe, 02:828e, 02:831Ne, 02:832Ne, 02:835e, 02:837e, 02:840e, 02:841e, 02:842e, 02:843e, 02:845e, 02:847e, 02:848e, 02:855e, 02:858Ne, 02:859e, 02:861e, 02:871Ne, 02:872e, 02:873e, 02:876e, 02:879Ne, 02:880Ne, 02:881e, 02:882e, 02:883e, 02:885e, 02:886e, 02:889e, 02:892e, 02:895Ne, 02:896Ne, 02:897e, 02:900e, 02:902e, 02:903e, 02:904e, 02:905e, 02:906e, 02:908e, 02:909e, 02:910e, 02:911e, 02:912e, 02:913e, 02:915Ne, 02:918e, 02:920e, 02:921e, 02:923e, 02:931e, 02:933e, 02:934e, 02:936Ne, 02:937e, 02:938e, 02:941e, 02:943e, 02:944e, 02:945Ne, 02:946Ne, 02:947e, 02:953e, 02:954e

*This genotype consists of alleles from a single group.*

*For your information, the following alleles may not be detected by any assay in this test:*

*A\*02:829e / A\*03:36Ne, A\*03:41e, A\*03:107e, A\*03:330Ne, A\*03:398e / A\*11:372e / A\*23:51e / A\*24:392e / A\*25:01:09e, A\*25:01:17e, A\*25:43e / A\*26:01:59e, A\*26:204e / A\*29:01:07e / A\*31:89e  
A\*03:01:23e?, A\*03:01:69e?, A\*03:01:83e?, A\*03:01:94e?, A\*03:32e?, A\*03:57e?, A\*03:109e?, A\*03:111e?, A\*03:128e?, A\*03:142e?, A\*03:173e?, A\*03:178Ne?, A\*03:199e?, A\*03:203e?, A\*03:211e?, A\*03:216e?, A\*03:252e?, A\*03:259e?, A\*03:267e?, A\*03:382e? / A\*11:35e? / A\*23:22e?, A\*23:28e?, A\*23:37:01e?, A\*23:37:02e?, A\*23:61e?, A\*23:100e? / A\*24:24e? / A\*26:01:65e?, A\*26:60Ne?, A\*26:85e?, A\*26:125e?, A\*26:131e?, A\*26:143e?, A\*26:144e?, A\*26:189e? / A\*29:02:06e?, A\*29:02:12e?, A\*29:02:25e?, A\*29:38e?, A\*29:41e?, A\*29:52e?, A\*29:54e?, A\*29:117e? / A\*31:61e?, A\*31:74e?, A\*31:90e?, A\*31:101e?*

## HLA-B

| ALLELE GROUP                        | ALLELES                                                                                                                                                                                                                                                                                                                                                                                                                                                                                                                                                                                                                                                                                                                                                                                                                                                                                                                                                                                                                                                                                                                                                                                                                                                                                                                                                                                                                                                                                                                                                                                                                                                                                                                                                                                                                                                                                                                                                                                                                                                                                                                                                                                                                                                                                                                                                                                                                                                                                                                                                                                                                                                                                                                                                                                                                                                                                                                          | P GROUP                                                                                                                                               | ANTIGEN    |
|-------------------------------------|----------------------------------------------------------------------------------------------------------------------------------------------------------------------------------------------------------------------------------------------------------------------------------------------------------------------------------------------------------------------------------------------------------------------------------------------------------------------------------------------------------------------------------------------------------------------------------------------------------------------------------------------------------------------------------------------------------------------------------------------------------------------------------------------------------------------------------------------------------------------------------------------------------------------------------------------------------------------------------------------------------------------------------------------------------------------------------------------------------------------------------------------------------------------------------------------------------------------------------------------------------------------------------------------------------------------------------------------------------------------------------------------------------------------------------------------------------------------------------------------------------------------------------------------------------------------------------------------------------------------------------------------------------------------------------------------------------------------------------------------------------------------------------------------------------------------------------------------------------------------------------------------------------------------------------------------------------------------------------------------------------------------------------------------------------------------------------------------------------------------------------------------------------------------------------------------------------------------------------------------------------------------------------------------------------------------------------------------------------------------------------------------------------------------------------------------------------------------------------------------------------------------------------------------------------------------------------------------------------------------------------------------------------------------------------------------------------------------------------------------------------------------------------------------------------------------------------------------------------------------------------------------------------------------------------|-------------------------------------------------------------------------------------------------------------------------------------------------------|------------|
| <b>B*44</b><br>6 common<br>569 rare | <b>B* 44:02:01:01</b> , 44:02:01:03e, 44:02:01:04e, 44:02:01:05e, 44:02:01:06e, 44:02:01:07e, 44:02:01:08e, 44:02:01:09e, 44:02:01:10e, 44:02:01:11e, 44:02:01:12e, 44:02:01:13Qe, 44:02:01:14e, 44:02:01:15e, 44:02:01:16e, 44:02:01:17e, 44:02:01:18e, 44:02:01:19e, 44:02:01:20e, 44:02:01:21e, 44:02:01:22e, 44:02:01:23e, 44:02:01:24e, 44:02:01:25e, 44:02:01:26e, 44:02:01:27e, 44:02:01:28e, 44:02:01:29e, 44:02:01:30e, 44:02:01:31e, 44:02:01:32e, 44:02:01:33e, 44:02:01:34e, 44:02:01:35e, 44:02:01:36e, 44:02:01:37e, 44:02:01:38e, 44:02:01:39e, 44:02:01:40e, 44:02:01:41e, 44:02:01:42e, 44:02:01:43e, 44:02:01:44e, 44:02:01:45e, 44:02:01:46e, 44:02:01:47e, 44:02:01:48e, 44:02:01:49e, 44:02:02e, 44:02:03e, 44:02:04e, 44:02:05e, 44:02:06e, 44:02:07e, 44:02:08e, 44:02:09e, 44:02:10e, 44:02:11e, 44:02:12e, 44:02:13e, 44:02:14e, 44:02:15e, 44:02:16e, 44:02:17e, 44:02:18e, 44:02:19e, 44:02:20e, 44:02:21e, 44:02:22e, 44:02:23e, 44:02:24e, 44:02:25e, 44:02:26e, 44:02:27e, 44:02:28e, 44:02:29e, 44:02:30e, 44:02:31e, 44:02:32e, 44:02:33e, 44:02:34e, 44:02:35e, 44:02:36e, 44:02:37e, 44:02:38e, 44:02:39e, 44:02:40e, 44:02:41e, 44:02:42e, 44:02:43e, 44:02:44e, 44:02:45e, 44:02:46e, 44:02:47e, 44:02:48e, 44:02:49e, 44:02:50e, 44:02:51e, 44:02:52e, 44:02:53e, 44:02:54e, 44:02:55e, 44:02:56e, 44:02:57e, 44:02:58e, 44:02:59e, 44:02:60e, 44:02:61e, 44:02:62e, 44:02:63e, 44:02:64e, 44:02:65e, 44:02:66e, 44:02:67e, 44:02:68e, 44:02:69e, 44:02:70e, <b>44:03:01:01</b> , 44:03:01:02e, 44:03:01:03e, 44:03:01:04e, 44:03:01:05e, 44:03:01:06e, 44:03:01:07e, 44:03:01:08e, 44:03:01:09e, 44:03:01:10e, 44:03:01:11e, 44:03:01:12e, 44:03:01:13e, 44:03:01:14e, 44:03:01:15e, 44:03:01:16e, 44:03:01:17e, 44:03:01:18e, 44:03:01:19e, 44:03:01:20e, 44:03:01:21e, 44:03:01:22e, 44:03:01:23e, 44:03:01:24e, 44:03:01:25e, 44:03:01:26e, 44:03:01:27e, 44:03:01:28e, 44:03:01:29e, 44:03:01:30e, 44:03:01:31e, 44:03:01:32e, 44:03:01:33e, 44:03:01:34e, 44:03:01:35e, 44:03:01:36e, 44:03:01:37e, 44:03:01:38e, <b>44:03:02:01</b> , 44:03:02:02e, 44:03:02:03e, 44:03:03e, 44:03:04e, 44:03:05e, 44:03:06e, 44:03:07e, 44:03:08e, 44:03:09e, 44:03:10e, 44:03:11e, 44:03:12e, 44:03:13e, 44:03:14e, 44:03:15e, 44:03:16e, 44:03:17e, 44:03:18e, 44:03:19e, 44:03:20e, 44:03:21e, 44:03:22e, 44:03:23e, 44:03:24e, 44:03:25e, 44:03:26e, 44:03:27e, 44:03:28e, 44:03:29e, 44:03:30e, 44:03:31e, 44:03:32e, 44:03:33e, 44:03:34e, 44:03:35e, 44:03:36e, 44:03:37e, 44:03:38e, 44:03:39e, 44:03:41e, 44:03:42e, 44:03:43e, 44:03:44e, 44:03:45e, 44:03:46e, 44:03:47e, 44:03:48e, 44:03:49e, 44:03:50e, 44:03:51e, 44:03:52e, 44:03:53e, 44:03:54e, 44:03:55e, 44:03:56e, 44:03:57e, 44:03:58e, <b>44:05:01:01</b> , 44:05:01:02e, 44:05:01:03e, 44:05:01:04e, 44:05:02e, 44:05:03e, 44:05:04e, <b>44:27:01:01</b> , 44:27:01:02e, 44:27:02e, 44:27:03e, 44:29d, 44:53:01e, 44:53:02e | 44:02P<br>44:03P<br>44:05P<br>44:29P<br>44:53P                                                                                                        | <b>B44</b> |
|                                     | <b>B* 44:04</b> , 44:07d, 44:12d, 44:13e, 44:14e, 44:32e                                                                                                                                                                                                                                                                                                                                                                                                                                                                                                                                                                                                                                                                                                                                                                                                                                                                                                                                                                                                                                                                                                                                                                                                                                                                                                                                                                                                                                                                                                                                                                                                                                                                                                                                                                                                                                                                                                                                                                                                                                                                                                                                                                                                                                                                                                                                                                                                                                                                                                                                                                                                                                                                                                                                                                                                                                                                         | -                                                                                                                                                     |            |
|                                     | <b>B* 44:19Ne</b> , 44:23:01:01Nd, 44:23:01:02Ne, 44:52Ne                                                                                                                                                                                                                                                                                                                                                                                                                                                                                                                                                                                                                                                                                                                                                                                                                                                                                                                                                                                                                                                                                                                                                                                                                                                                                                                                                                                                                                                                                                                                                                                                                                                                                                                                                                                                                                                                                                                                                                                                                                                                                                                                                                                                                                                                                                                                                                                                                                                                                                                                                                                                                                                                                                                                                                                                                                                                        | -                                                                                                                                                     | Null       |
|                                     | <b>B* 44:02:01:02Se</b>                                                                                                                                                                                                                                                                                                                                                                                                                                                                                                                                                                                                                                                                                                                                                                                                                                                                                                                                                                                                                                                                                                                                                                                                                                                                                                                                                                                                                                                                                                                                                                                                                                                                                                                                                                                                                                                                                                                                                                                                                                                                                                                                                                                                                                                                                                                                                                                                                                                                                                                                                                                                                                                                                                                                                                                                                                                                                                          | 44:02P                                                                                                                                                | Soluble    |
|                                     | <b>B* 44:28:01e</b> , 44:28:02e, 44:34:01e, 44:34:02e, 44:41:01e, 44:41:02e, 44:50:02e, 44:59:01e, 44:59:02e, 44:66e, 44:69:01e, 44:69:02e, 44:84:02e, 44:118e, 44:126:01e, 44:126:02e, 44:128:01e, 44:128:02e, 44:163:01e, 44:163:02e, 44:173e, 44:186:01e, 44:186:02e, 44:187e, 44:192:01e, 44:192:02e, 44:192:03e, 44:192:04e, 44:203:01e, 44:203:02e, 44:204:01e, 44:204:02e, 44:243e, 44:262e, 44:266:01e, 44:266:02e, 44:270:01e, 44:270:02e, 44:278e, 44:279e, 44:280e, 44:281:01e, 44:281:02e, 44:285e, 44:292e, 44:298e, 44:301e, 44:302e, 44:311e, 44:313e, 44:315e, 44:321e, 44:324e, 44:325e, 44:336e, 44:338e, 44:343e, 44:344e, 44:346e, 44:437e, 44:457e, 44:461e, 44:462e, 44:464:01:01e, 44:464:01:02e, 44:465e, 44:467e, 44:468e, 44:469e, 44:470e, 44:471e, 44:472e, 44:473e, 44:474e, 44:476e, 44:477e, 44:478e, 44:479e, 44:484e, 44:485e, 44:487e, 44:488e, 44:490e, 44:492e, 44:498e, 44:501e, 44:502e, 44:503e                                                                                                                                                                                                                                                                                                                                                                                                                                                                                                                                                                                                                                                                                                                                                                                                                                                                                                                                                                                                                                                                                                                                                                                                                                                                                                                                                                                                                                                                                                                                                                                                                                                                                                                                                                                                                                                                                                                                                                                           | 44:02P<br>44:03P<br>44:05P<br>44:28P<br>44:29P<br>44:34P<br>44:41P<br>44:50P<br>44:53P<br>44:59P<br>44:69P<br>44:84P<br>44:126P<br>44:128P<br>44:163P | -          |

|                                         |                                                                                                                                                                                                                                                                                                                                                                                                                                                                                                                                                                                                                                                                                                                                                                                                                                                                                                                                                                                                                                                                                                                                                                                                                                                                                                                                                                                                                                                                                                                                                                                                                                                                                                                                                                                                                                                                                                                                                                                                                                                                                                                                                                                                                                                                                                                  |                                                     |            |
|-----------------------------------------|------------------------------------------------------------------------------------------------------------------------------------------------------------------------------------------------------------------------------------------------------------------------------------------------------------------------------------------------------------------------------------------------------------------------------------------------------------------------------------------------------------------------------------------------------------------------------------------------------------------------------------------------------------------------------------------------------------------------------------------------------------------------------------------------------------------------------------------------------------------------------------------------------------------------------------------------------------------------------------------------------------------------------------------------------------------------------------------------------------------------------------------------------------------------------------------------------------------------------------------------------------------------------------------------------------------------------------------------------------------------------------------------------------------------------------------------------------------------------------------------------------------------------------------------------------------------------------------------------------------------------------------------------------------------------------------------------------------------------------------------------------------------------------------------------------------------------------------------------------------------------------------------------------------------------------------------------------------------------------------------------------------------------------------------------------------------------------------------------------------------------------------------------------------------------------------------------------------------------------------------------------------------------------------------------------------|-----------------------------------------------------|------------|
|                                         |                                                                                                                                                                                                                                                                                                                                                                                                                                                                                                                                                                                                                                                                                                                                                                                                                                                                                                                                                                                                                                                                                                                                                                                                                                                                                                                                                                                                                                                                                                                                                                                                                                                                                                                                                                                                                                                                                                                                                                                                                                                                                                                                                                                                                                                                                                                  | 44:186P<br>44:192P<br>44:203P<br>44:204P<br>44:266P |            |
|                                         | B* 44:11e, 44:21d, 44:22d, 44:24d, 44:26e, 44:30e, 44:33e, 44:35e, 44:36e, 44:38e, 44:39e, 44:45e, 44:48e, 44:49e, 44:51e, 44:56Ne, 44:58Ne, 44:61Ne, 44:63e, 44:65e, 44:67e, 44:68e, 44:70e, 44:71e, 44:72e, 44:73e, 44:74e, 44:76e, 44:77e, 44:78e, 44:80e, 44:81e, 44:82e, 44:85e, 44:86e, 44:87e, 44:88e, 44:89e, 44:92e, 44:93e, 44:94e, 44:96e, 44:97e, 44:98e, 44:99e, 44:100e, 44:101e, 44:102e, 44:104e, 44:105e, 44:107e, 44:108Ne, 44:111e, 44:112e, 44:113e, 44:114e, 44:115e, 44:116e, 44:119e, 44:120e, 44:121e, 44:122e, 44:123e, 44:124e, 44:125e, 44:127e, 44:133e, 44:134e, 44:136e, 44:137e, 44:138Qe, 44:139e, 44:141e, 44:142e, 44:143e, 44:144e, 44:145e, 44:147e, 44:148e, 44:149Ne, 44:151e, 44:152e, 44:153e, 44:154e, 44:155e, 44:157e, 44:159e, 44:160Qe, 44:161e, 44:162e, 44:164e, 44:165e, 44:167e, 44:168e, 44:169e, 44:170e, 44:171Ne, 44:172e, 44:174e, 44:175e, 44:177e, 44:178e, 44:179e, 44:180e, 44:181e, 44:182e, 44:183e, 44:185e, 44:188e, 44:189e, 44:191e, 44:193e, 44:195Ne, 44:196e, 44:197e, 44:198Ne, 44:199e, 44:200e, 44:201e, 44:202e, 44:206e, 44:207e, 44:208e, 44:209e, 44:214e, 44:215e, 44:216e, 44:217Ne, 44:218e, 44:219e, 44:220e, 44:222e, 44:223e, 44:227e, 44:228e, 44:229e, 44:231e, 44:233e, 44:234e, 44:235e, 44:236e, 44:237Ne, 44:238e, 44:239e, 44:240e, 44:241e, 44:242e, 44:244e, 44:245e, 44:247e, 44:248e, 44:249e, 44:250e, 44:252e, 44:253e, 44:255e, 44:257e, 44:259e, 44:260e, 44:261e, 44:264e, 44:265e, 44:267Ne, 44:271e, 44:272e, 44:273e, 44:274e, 44:282e, 44:283e, 44:284e, 44:286e, 44:287e, 44:288e, 44:289e, 44:291e, 44:293e, 44:294e, 44:295e, 44:296e, 44:297e, 44:300e, 44:303Ne, 44:304e, 44:305e, 44:306Ne, 44:307e, 44:308e, 44:309Ne, 44:310Ne, 44:312e, 44:314Ne, 44:316e, 44:317e, 44:318e, 44:319e, 44:320e, 44:322e, 44:323e, 44:326e, 44:327e, 44:328Ne, 44:329e, 44:330e, 44:331e, 44:332e, 44:333Ne, 44:334Ne, 44:335e, 44:337e, 44:341Ne, 44:342e, 44:345Ne, 44:439e, 44:440e, 44:441e, 44:442e, 44:443e, 44:444e, 44:446e, 44:447e, 44:448Ne, 44:449Ne, 44:450e, 44:451e, 44:452e, 44:453e, 44:454e, 44:455e, 44:456e, 44:458e, 44:460e, 44:463e, 44:466Ne, 44:475e, 44:480Qe, 44:481e, 44:482e, 44:483e, 44:486e, 44:489e, 44:491e, 44:493e, 44:494e, 44:495e, 44:496e, 44:497e, 44:499e, 44:500e, 44:504e | -                                                   |            |
| <b>B*44</b><br><br>5 common<br>535 rare | <b>B* 44:02:01:01</b> , 44:02:01:03e, 44:02:01:04e, 44:02:01:05e, 44:02:01:06e, 44:02:01:07e, 44:02:01:08e, 44:02:01:09e, 44:02:01:10e, 44:02:01:11e, 44:02:01:12e, 44:02:01:13Qe, 44:02:01:14e, 44:02:01:15e, 44:02:01:16e, 44:02:01:17e, 44:02:01:18e, 44:02:01:19e, 44:02:01:20e, 44:02:01:21e, 44:02:01:22e, 44:02:01:23e, 44:02:01:24e, 44:02:01:25e, 44:02:01:26e, 44:02:01:27e, 44:02:01:28e, 44:02:01:29e, 44:02:01:30e, 44:02:01:31e, 44:02:01:32e, 44:02:01:33e, 44:02:01:34e, 44:02:01:35e, 44:02:01:36e, 44:02:01:37e, 44:02:01:38e, 44:02:01:39e, 44:02:01:40e, 44:02:01:41e, 44:02:01:42e, 44:02:01:43e, 44:02:01:44e, 44:02:01:45e, 44:02:01:46e, 44:02:01:47e, 44:02:01:48e, 44:02:01:49e, 44:02:02e, 44:02:03e, 44:02:05e, 44:02:06e, 44:02:07e, 44:02:08e, 44:02:10e, 44:02:11e, 44:02:12e, 44:02:13e, 44:02:14e, 44:02:15e, 44:02:16e, 44:02:17e, 44:02:18e, 44:02:19e, 44:02:20e, 44:02:21e, 44:02:22e, 44:02:23e, 44:02:24e, 44:02:25e, 44:02:26e, 44:02:27e, 44:02:28e, 44:02:29e, 44:02:30e, 44:02:31e, 44:02:32e, 44:02:33e, 44:02:34e, 44:02:35e, 44:02:36e, 44:02:37e, 44:02:38e, 44:02:39e, 44:02:40e, 44:02:41e, 44:02:42e, 44:02:43e, 44:02:44e, 44:02:45e, 44:02:46e, 44:02:47e, 44:02:48e, 44:02:49e, 44:02:50e, 44:02:51e, 44:02:52e, 44:02:53e, 44:02:54e, 44:02:55e, 44:02:56e, 44:02:57e, 44:02:58e, 44:02:59e, 44:02:60e, 44:02:61e, 44:02:62e, 44:02:63e, 44:02:64e, 44:02:65e, 44:02:66e, 44:02:67e, 44:02:68e, 44:02:69e, 44:02:70e, <b>44:03:01:01</b> , 44:03:01:02e, 44:03:01:03e, 44:03:01:04e, 44:03:01:05e, 44:03:01:06e, 44:03:01:07e, 44:03:01:08e, 44:03:01:09e, 44:03:01:10e, 44:03:01:11e, 44:03:01:12e, 44:03:01:13e, 44:03:01:14e, 44:03:01:15e, 44:03:01:16e, 44:03:01:17e, 44:03:01:18e, 44:03:01:19e, 44:03:01:20e, 44:03:01:21e, 44:03:01:22e, 44:03:01:23e, 44:03:01:24e, 44:03:01:25e, 44:03:01:26e, 44:03:01:27e, 44:03:01:28e, 44:03:01:29e, 44:03:01:30e, 44:03:01:31e, 44:03:01:32e, 44:03:01:33e, 44:03:01:34e, 44:03:01:35e, 44:03:01:36e, 44:03:01:37e, 44:03:01:38e, <b>44:03:02:01</b> , 44:03:02:02e, 44:03:02:03e, 44:03:03e, 44:03:04e, 44:03:05e, 44:03:06e, 44:03:07e, 44:03:08e, 44:03:09e, 44:03:10e, 44:03:11e, 44:03:12e, 44:03:13e, 44:03:15e, 44:03:16e, 44:03:17e,                                                                | 44:02P<br>44:03P<br>44:29P<br>44:53P                | <b>B44</b> |

|                                                                                                                                                                                                                                                                                                                                                                                                                                                                                                                                                                                                                                                                                                                                                                                                                                                                                                                                                                                                                                                                                                                                                                                                                                                                                                                                                                                                                                                                                                                                                                                                                                                                                                                                                                                                                                                                                                                                                                                                                                                                                                                                  |                                                                                                                                                                                                    |         |
|----------------------------------------------------------------------------------------------------------------------------------------------------------------------------------------------------------------------------------------------------------------------------------------------------------------------------------------------------------------------------------------------------------------------------------------------------------------------------------------------------------------------------------------------------------------------------------------------------------------------------------------------------------------------------------------------------------------------------------------------------------------------------------------------------------------------------------------------------------------------------------------------------------------------------------------------------------------------------------------------------------------------------------------------------------------------------------------------------------------------------------------------------------------------------------------------------------------------------------------------------------------------------------------------------------------------------------------------------------------------------------------------------------------------------------------------------------------------------------------------------------------------------------------------------------------------------------------------------------------------------------------------------------------------------------------------------------------------------------------------------------------------------------------------------------------------------------------------------------------------------------------------------------------------------------------------------------------------------------------------------------------------------------------------------------------------------------------------------------------------------------|----------------------------------------------------------------------------------------------------------------------------------------------------------------------------------------------------|---------|
| 44:03:18e, 44:03:19e, 44:03:20e, 44:03:21e, 44:03:22e, 44:03:23e, 44:03:24e, 44:03:25e, 44:03:26e, 44:03:27e, 44:03:28e, 44:03:29e, 44:03:30e, 44:03:31e, 44:03:32e, 44:03:33e, 44:03:34e, 44:03:35e, 44:03:36e, 44:03:37e, 44:03:38e, 44:03:39e, 44:03:41e, 44:03:42e, 44:03:43e, 44:03:44e, 44:03:45e, 44:03:46e, 44:03:47e, 44:03:48e, 44:03:49e, 44:03:50e, 44:03:51e, 44:03:52e, 44:03:53e, 44:03:54e, 44:03:55e, 44:03:56e, 44:03:57e, 44:03:58e, <b>44:27:01:01</b> , 44:27:01:02e, 44:27:02e, 44:27:03e, 44:29d, 44:53:01e                                                                                                                                                                                                                                                                                                                                                                                                                                                                                                                                                                                                                                                                                                                                                                                                                                                                                                                                                                                                                                                                                                                                                                                                                                                                                                                                                                                                                                                                                                                                                                                               |                                                                                                                                                                                                    |         |
| <b>B* 44:04</b> , 44:07d, 44:12d, 44:13e, 44:14e, 44:32e                                                                                                                                                                                                                                                                                                                                                                                                                                                                                                                                                                                                                                                                                                                                                                                                                                                                                                                                                                                                                                                                                                                                                                                                                                                                                                                                                                                                                                                                                                                                                                                                                                                                                                                                                                                                                                                                                                                                                                                                                                                                         | -                                                                                                                                                                                                  |         |
| B* 44:19Ne, 44:23:01:01Nd, 44:23:01:02Ne                                                                                                                                                                                                                                                                                                                                                                                                                                                                                                                                                                                                                                                                                                                                                                                                                                                                                                                                                                                                                                                                                                                                                                                                                                                                                                                                                                                                                                                                                                                                                                                                                                                                                                                                                                                                                                                                                                                                                                                                                                                                                         | -                                                                                                                                                                                                  | Null    |
| B* 44:02:01:02Se                                                                                                                                                                                                                                                                                                                                                                                                                                                                                                                                                                                                                                                                                                                                                                                                                                                                                                                                                                                                                                                                                                                                                                                                                                                                                                                                                                                                                                                                                                                                                                                                                                                                                                                                                                                                                                                                                                                                                                                                                                                                                                                 | 44:02P                                                                                                                                                                                             | Soluble |
| B* 44:28:01e, 44:28:02e, 44:34:01e, 44:34:02e, 44:41:01e, 44:41:02e, 44:50:02e, 44:59:01e, 44:59:02e, 44:66e, 44:69:01e, 44:69:02e, 44:84:02e, 44:118e, 44:126:01e, 44:126:02e, 44:128:01e, 44:128:02e, 44:163:01e, 44:163:02e, 44:173e, 44:186:01e, 44:186:02e, 44:187e, 44:192:01e, 44:192:03e, 44:203:01e, 44:203:02e, 44:204:01e, 44:204:02e, 44:243e, 44:262e, 44:266:01e, 44:266:02e, 44:270:01e, 44:270:02e, 44:278e, 44:279e, 44:280e, 44:281:01e, 44:281:02e, 44:285e, 44:292e, 44:298e, 44:301e, 44:302e, 44:311e, 44:313e, 44:315e, 44:321e, 44:324e, 44:325e, 44:336e, 44:338e, 44:343e, 44:344e, 44:346e, 44:437e, 44:457e, 44:461e, 44:462e, 44:464:01:01e, 44:464:01:02e, 44:467e, 44:468e, 44:469e, 44:470e, 44:471e, 44:472e, 44:473e, 44:474e, 44:476e, 44:477e, 44:478e, 44:479e, 44:484e, 44:485e, 44:487e, 44:488e, 44:490e, 44:492e, 44:498e, 44:501e, 44:502e, 44:503e                                                                                                                                                                                                                                                                                                                                                                                                                                                                                                                                                                                                                                                                                                                                                                                                                                                                                                                                                                                                                                                                                                                                                                                                                                    | 44:02P<br>44:03P<br>44:28P<br>44:29P<br>44:34P<br>44:41P<br>44:50P<br>44:53P<br>44:59P<br>44:69P<br>44:84P<br>44:126P<br>44:128P<br>44:163P<br>44:186P<br>44:192P<br>44:203P<br>44:204P<br>44:266P | -       |
| B* 44:11e, 44:21d, 44:22d, 44:24d, 44:26e, 44:30e, 44:33e, 44:35e, 44:36e, 44:38e, 44:39e, 44:45e, 44:48e, 44:49e, 44:51e, 44:56Ne, 44:61Ne, 44:63e, 44:65e, 44:67e, 44:68e, 44:71e, 44:72e, 44:73e, 44:74e, 44:76e, 44:80e, 44:81e, 44:85e, 44:86e, 44:87e, 44:88e, 44:89e, 44:92e, 44:93e, 44:94e, 44:96e, 44:97e, 44:98e, 44:99e, 44:100e, 44:101e, 44:102e, 44:104e, 44:105e, 44:108Ne, 44:111e, 44:112e, 44:113e, 44:114e, 44:115e, 44:116e, 44:119e, 44:120e, 44:121e, 44:122e, 44:124e, 44:125e, 44:127e, 44:133e, 44:137e, 44:138Qe, 44:141e, 44:142e, 44:143e, 44:145e, 44:147e, 44:148e, 44:149Ne, 44:151e, 44:152e, 44:153e, 44:154e, 44:155e, 44:157e, 44:159e, 44:160Qe, 44:161e, 44:162e, 44:164e, 44:165e, 44:167e, 44:168e, 44:170e, 44:171Ne, 44:172e, 44:174e, 44:175e, 44:177e, 44:178e, 44:179e, 44:180e, 44:181e, 44:183e, 44:185e, 44:188e, 44:189e, 44:191e, 44:193e, 44:195Ne, 44:196e, 44:197e, 44:198Ne, 44:199e, 44:200e, 44:201e, 44:202e, 44:206e, 44:207e, 44:208e, 44:209e, 44:214e, 44:215e, 44:216e, 44:217Ne, 44:218e, 44:219e, 44:220e, 44:222e, 44:223e, 44:227e, 44:228e, 44:229e, 44:231e, 44:233e, 44:234e, 44:235e, 44:237Ne, 44:238e, 44:239e, 44:240e, 44:241e, 44:242e, 44:244e, 44:245e, 44:247e, 44:248e, 44:249e, 44:252e, 44:253e, 44:255e, 44:257e, 44:259e, 44:260e, 44:261e, 44:265e, 44:267Ne, 44:271e, 44:272e, 44:273e, 44:274e, 44:282e, 44:283e, 44:284e, 44:286e, 44:287e, 44:289e, 44:291e, 44:293e, 44:294e, 44:295e, 44:296e, 44:297e, 44:300e, 44:303Ne, 44:304e, 44:305e, 44:306Ne, 44:307e, 44:309Ne, 44:310Ne, 44:312e, 44:314Ne, 44:316e, 44:317e, 44:318e, 44:319e, 44:320e, 44:322e, 44:323e, 44:326e, 44:327e, 44:328Ne, 44:329e, 44:331e, 44:332e, 44:333Ne, 44:334Ne, 44:335e, 44:337e, 44:341Ne, 44:342e, 44:345Ne, 44:439e, 44:440e, 44:441e, 44:442e, 44:443e, 44:444e, 44:446e, 44:447e, 44:448Ne, 44:449Ne, 44:450e, 44:451e, 44:452e, 44:453e, 44:454e, 44:455e, 44:456e, 44:458e, 44:460e, 44:463e, 44:466Ne, 44:475e, 44:480Qe, 44:481e, 44:482e, 44:483e, 44:486e, 44:489e, 44:491e, 44:493e, 44:494e, 44:495e, 44:496e, 44:497e, 44:499e, 44:500e | -                                                                                                                                                                                                  |         |

*This genotype consists of alleles from a single group.*

*Cannot exclude the following RARE alleles from another locus:*

*A\*02:285e, A\*02:403e, A\*02:799e, C\*05:01:06e, C\*05:152e, C\*05:164e, C\*05:216:01:01e, C\*05:216:01:02e, C\*05:217e*

## Bw

|                                        | ALLELES                                                                                                                                                                                                                                                                                                                                                                                                                                                                                                                                                                                                                                                                                                                                                                                                                                                                                                                                                                                                                                                                                                                                                                                                                                                                                                                                                                                                                                                                                                                                                                                                                                                                                                                                                                                                                                                                                                                                                                                                                                                                                                                                                                                                                                                                                                                                                                                                                                                                                                                                                                                                                                                                                                                                                                                                                                                                                                                                                                                                                                                                                                                                                                                                                                                                                                                                                                                                                                                                                                                                                                                                                                                                                                                                                                                                                                                                                                                                                                                                                                                                                                                                                                                                                                                                                                                                                                                                                                                                                                                                                                                                                                                                                                                                                                                                                                                                                                                                                                                                                                                                                                                                                                                                                                                                                                                                                                                                                                                                                                                                                                                                                                                   | ANTIGEN |
|----------------------------------------|-----------------------------------------------------------------------------------------------------------------------------------------------------------------------------------------------------------------------------------------------------------------------------------------------------------------------------------------------------------------------------------------------------------------------------------------------------------------------------------------------------------------------------------------------------------------------------------------------------------------------------------------------------------------------------------------------------------------------------------------------------------------------------------------------------------------------------------------------------------------------------------------------------------------------------------------------------------------------------------------------------------------------------------------------------------------------------------------------------------------------------------------------------------------------------------------------------------------------------------------------------------------------------------------------------------------------------------------------------------------------------------------------------------------------------------------------------------------------------------------------------------------------------------------------------------------------------------------------------------------------------------------------------------------------------------------------------------------------------------------------------------------------------------------------------------------------------------------------------------------------------------------------------------------------------------------------------------------------------------------------------------------------------------------------------------------------------------------------------------------------------------------------------------------------------------------------------------------------------------------------------------------------------------------------------------------------------------------------------------------------------------------------------------------------------------------------------------------------------------------------------------------------------------------------------------------------------------------------------------------------------------------------------------------------------------------------------------------------------------------------------------------------------------------------------------------------------------------------------------------------------------------------------------------------------------------------------------------------------------------------------------------------------------------------------------------------------------------------------------------------------------------------------------------------------------------------------------------------------------------------------------------------------------------------------------------------------------------------------------------------------------------------------------------------------------------------------------------------------------------------------------------------------------------------------------------------------------------------------------------------------------------------------------------------------------------------------------------------------------------------------------------------------------------------------------------------------------------------------------------------------------------------------------------------------------------------------------------------------------------------------------------------------------------------------------------------------------------------------------------------------------------------------------------------------------------------------------------------------------------------------------------------------------------------------------------------------------------------------------------------------------------------------------------------------------------------------------------------------------------------------------------------------------------------------------------------------------------------------------------------------------------------------------------------------------------------------------------------------------------------------------------------------------------------------------------------------------------------------------------------------------------------------------------------------------------------------------------------------------------------------------------------------------------------------------------------------------------------------------------------------------------------------------------------------------------------------------------------------------------------------------------------------------------------------------------------------------------------------------------------------------------------------------------------------------------------------------------------------------------------------------------------------------------------------------------------------------------------------------------------------------------------------------|---------|
| <b>Bw4</b><br><br>6 common<br>568 rare | <p><b>B* 44:02:01:01</b>, 44:02:01:02Se, 44:02:01:03e, 44:02:01:04e, 44:02:01:05e, 44:02:01:06e, 44:02:01:07e, 44:02:01:08e, 44:02:01:09e, 44:02:01:10e, 44:02:01:11e, 44:02:01:12e, 44:02:01:13Qe, 44:02:01:14e, 44:02:01:15e, 44:02:01:16e, 44:02:01:17e, 44:02:01:18e, 44:02:01:19e, 44:02:01:20e, 44:02:01:21e, 44:02:01:22e, 44:02:01:23e, 44:02:01:24e, 44:02:01:25e, 44:02:01:26e, 44:02:01:27e, 44:02:01:28e, 44:02:01:29e, 44:02:01:30e, 44:02:01:31e, 44:02:01:32e, 44:02:01:33e, 44:02:01:34e, 44:02:01:35e, 44:02:01:36e, 44:02:01:37e, 44:02:01:38e, 44:02:01:39e, 44:02:01:40e, 44:02:01:41e, 44:02:01:42e, 44:02:01:43e, 44:02:01:44e, 44:02:01:45e, 44:02:01:46e, 44:02:01:47e, 44:02:01:48e, 44:02:01:49e, 44:02:02e, 44:02:03e, 44:02:04e, 44:02:05e, 44:02:06e, 44:02:07e, 44:02:08e, 44:02:09e, 44:02:10e, 44:02:11e, 44:02:12e, 44:02:13e, 44:02:14e, 44:02:15e, 44:02:16e, 44:02:17e, 44:02:18e, 44:02:19e, 44:02:20e, 44:02:21e, 44:02:22e, 44:02:23e, 44:02:24e, 44:02:25e, 44:02:26e, 44:02:27e, 44:02:28e, 44:02:29e, 44:02:30e, 44:02:31e, 44:02:32e, 44:02:33e, 44:02:34e, 44:02:35e, 44:02:36e, 44:02:37e, 44:02:38e, 44:02:39e, 44:02:40e, 44:02:41e, 44:02:42e, 44:02:43e, 44:02:44e, 44:02:45e, 44:02:46e, 44:02:47e, 44:02:48e, 44:02:49e, 44:02:50e, 44:02:51e, 44:02:52e, 44:02:53e, 44:02:54e, 44:02:55e, 44:02:56e, 44:02:57e, 44:02:58e, 44:02:59e, 44:02:60e, 44:02:61e, 44:02:62e, 44:02:63e, 44:02:64e, 44:02:65e, 44:02:66e, 44:02:67e, 44:02:68e, 44:02:69e, 44:02:70e, <b>44:03:01:01</b>, 44:03:01:02e, 44:03:01:03e, 44:03:01:04e, 44:03:01:05e, 44:03:01:06e, 44:03:01:07e, 44:03:01:08e, 44:03:01:09e, 44:03:01:10e, 44:03:01:11e, 44:03:01:12e, 44:03:01:13e, 44:03:01:14e, 44:03:01:15e, 44:03:01:16e, 44:03:01:17e, 44:03:01:18e, 44:03:01:19e, 44:03:01:20e, 44:03:01:21e, 44:03:01:22e, 44:03:01:23e, 44:03:01:24e, 44:03:01:25e, 44:03:01:26e, 44:03:01:27e, 44:03:01:28e, 44:03:01:29e, 44:03:01:30e, 44:03:01:31e, 44:03:01:32e, 44:03:01:33e, 44:03:01:34e, 44:03:01:35e, 44:03:01:36e, 44:03:01:37e, 44:03:01:38e, <b>44:03:02:01</b>, 44:03:02:02e, 44:03:02:03e, 44:03:03e, 44:03:04e, 44:03:05e, 44:03:06e, 44:03:07e, 44:03:08e, 44:03:09e, 44:03:10e, 44:03:11e, 44:03:12e, 44:03:13e, 44:03:14e, 44:03:15e, 44:03:16e, 44:03:17e, 44:03:18e, 44:03:19e, 44:03:20e, 44:03:21e, 44:03:22e, 44:03:23e, 44:03:24e, 44:03:25e, 44:03:26e, 44:03:27e, 44:03:28e, 44:03:29e, 44:03:30e, 44:03:31e, 44:03:32e, 44:03:33e, 44:03:34e, 44:03:35e, 44:03:36e, 44:03:37e, 44:03:38e, 44:03:39e, 44:03:41e, 44:03:42e, 44:03:43e, 44:03:44e, 44:03:45e, 44:03:46e, 44:03:47e, 44:03:48e, 44:03:49e, 44:03:50e, 44:03:51e, 44:03:52e, 44:03:53e, 44:03:54e, 44:03:55e, 44:03:56e, 44:03:57e, 44:03:58e, <b>44:04</b>, <b>44:05:01:01</b>, 44:05:01:02e, 44:05:01:03e, 44:05:01:04e, 44:05:02e, 44:05:03e, 44:05:04e, <i>44:07d</i>, 44:11e, <i>44:12d</i>, 44:13e, 44:14e, 44:19Ne, <i>44:21d</i>, <i>44:22d</i>, <i>44:23:01:01Nd</i>, <i>44:23:01:02Ne</i>, <i>44:24d</i>, 44:26e, <b>44:27:01:01</b>, 44:27:01:02e, 44:27:02e, 44:27:03e, 44:28:01e, 44:28:02e, <i>44:29d</i>, 44:30e, 44:32e, 44:33e, 44:34:01e, 44:34:02e, 44:35e, 44:36e, 44:38e, 44:39e, 44:41:01e, 44:41:02e, 44:45e, 44:48e, 44:49e, 44:50:02e, 44:51e, 44:52Ne, 44:53:01e, 44:53:02e, 44:56Ne, 44:58Ne, 44:59:01e, 44:59:02e, 44:61Ne, 44:63e, 44:65e, 44:66e, 44:67e, 44:68e, 44:69:01e, 44:69:02e, 44:70e, 44:71e, 44:72e, 44:73e, 44:74e, 44:76e, 44:77e, 44:78e, 44:80e, 44:81e, 44:82e, 44:84:02e, 44:85e, 44:86e, 44:87e, 44:88e, 44:89e, 44:92e, 44:93e, 44:94e, 44:96e, 44:97e, 44:98e, 44:99e, 44:100e, 44:101e, 44:102e, 44:104e, 44:105e, 44:107e, 44:108Ne, 44:111e, 44:112e, 44:113e, 44:114e, 44:115e, 44:116e, 44:118e, 44:119e, 44:120e, 44:121e, 44:122e, 44:123e, 44:124e, 44:125e, 44:126:01e, 44:126:02e, 44:127e, 44:128:01e, 44:128:02e, 44:133e, 44:134e, 44:136e, 44:137e, 44:138Qe, 44:139e, 44:141e, 44:142e, 44:143e, 44:144e, 44:145e, 44:147e, 44:148e, 44:149Ne, 44:151e, 44:152e, 44:153e, 44:154e, 44:155e, 44:157e, 44:159e, 44:160Qe, 44:161e, 44:162e, 44:163:01e, 44:163:02e, 44:164e, 44:165e, 44:167e, 44:168e, 44:169e, 44:170e, 44:171Ne, 44:172e, 44:173e, 44:174e, 44:175e, 44:177e, 44:178e, 44:179e, 44:180e, 44:181e, 44:182e, 44:183e, 44:185e, 44:186:01e, 44:186:02e, 44:187e, 44:188e, 44:189e, 44:191e, 44:192:01e, 44:192:02e, 44:192:03e, 44:192:04e, 44:193e, 44:195Ne, 44:196e, 44:197e, 44:198Ne, 44:199e, 44:200e, 44:201e, 44:202e, 44:203:01e, 44:203:02e, 44:204:01e, 44:204:02e, 44:206e, 44:207e, 44:208e, 44:209e, 44:214e, 44:215e, 44:216e, 44:217Ne, 44:218e, 44:219e, 44:220e, 44:222e, 44:223e, 44:227e, 44:228e, 44:229e, 44:231e, 44:233e, 44:234e, 44:235e, 44:236e, 44:237Ne, 44:238e, 44:239e, 44:240e, 44:241e, 44:242e, 44:243e, 44:244e, 44:245e, 44:247e, 44:248e, 44:249e, 44:250e, 44:252e, 44:253e, 44:255e, 44:257e, 44:259e, 44:260e, 44:261e, 44:262e, 44:264e, 44:265e, 44:266:01e, 44:266:02e, 44:267Ne, 44:270:01e, 44:270:02e, 44:271e, 44:272e, 44:273e, 44:274e, 44:278e, 44:279e, 44:280e, 44:281:01e, 44:281:02e, 44:282e, 44:283e, 44:284e, 44:285e, 44:286e, 44:287e, 44:288e, 44:289e, 44:291e, 44:292e, 44:293e, 44:294e, 44:295e, 44:296e, 44:297e, 44:298e, 44:300e, 44:301e, 44:302e, 44:303Ne, 44:304e, 44:305e, 44:306Ne, 44:307e, 44:308e, 44:309Ne, 44:310Ne, 44:311e, 44:312e, 44:313e, 44:314Ne, 44:315e, 44:316e, 44:317e, 44:318e, 44:319e, 44:320e, 44:321e, 44:322e, 44:323e, 44:324e, 44:325e, 44:326e, 44:327e, 44:328Ne, 44:329e, 44:330e, 44:331e, 44:332e, 44:333Ne, 44:334Ne, 44:335e, 44:336e, 44:337e,</p> | Bw4     |

44:338e, 44:341Ne, 44:342e, 44:343e, 44:344e, 44:346e, 44:437e, 44:439e, 44:440e, 44:441e, 44:442e, 44:443e, 44:444e, 44:446e, 44:447e, 44:448Ne, 44:449Ne, 44:450e, 44:451e, 44:452e, 44:453e, 44:454e, 44:455e, 44:456e, 44:457e, 44:458e, 44:460e, 44:461e, 44:462e, 44:463e, 44:464:01:01e, 44:464:01:02e, 44:465e, 44:466Ne, 44:467e, 44:468e, 44:469e, 44:470e, 44:471e, 44:472e, 44:473e, 44:474e, 44:475e, 44:476e, 44:477e, 44:478e, 44:479e, 44:480Qe, 44:481e, 44:482e, 44:483e, 44:484e, 44:485e, 44:486e, 44:487e, 44:488e, 44:489e, 44:490e, 44:491e, 44:492e, 44:493e, 44:494e, 44:495e, 44:496e, 44:497e, 44:498e, 44:499e, 44:500e, 44:501e, 44:502e, 44:503e, 44:504e

*Notice: The Bw4 Bw6 test detects HLA-B locus alleles only.*



HLA-C

More than one genotype can explain the reaction pattern.

Possibilities to consider:

| ALLELE GROUP                                                                                                                                                                                                                                                                                                                                                                                                                                                                                                                                                                                                                                                                                                                                                                                                                                                                                                                                                                                                                                                                                                                                                                                                                                                                                                                                                                                                                                                                                         | ALLELES                                                                                                                                                                                                                                                                                                                                                                                                                                                                                                                                                                                                                                                                                                                                                                                                                                                                                                                                                                                                                                                                                                                                                                                                                                                                                                                                                                                                                         | P GROUP                                                                                                                                                 | ANTIGEN |
|------------------------------------------------------------------------------------------------------------------------------------------------------------------------------------------------------------------------------------------------------------------------------------------------------------------------------------------------------------------------------------------------------------------------------------------------------------------------------------------------------------------------------------------------------------------------------------------------------------------------------------------------------------------------------------------------------------------------------------------------------------------------------------------------------------------------------------------------------------------------------------------------------------------------------------------------------------------------------------------------------------------------------------------------------------------------------------------------------------------------------------------------------------------------------------------------------------------------------------------------------------------------------------------------------------------------------------------------------------------------------------------------------------------------------------------------------------------------------------------------------|---------------------------------------------------------------------------------------------------------------------------------------------------------------------------------------------------------------------------------------------------------------------------------------------------------------------------------------------------------------------------------------------------------------------------------------------------------------------------------------------------------------------------------------------------------------------------------------------------------------------------------------------------------------------------------------------------------------------------------------------------------------------------------------------------------------------------------------------------------------------------------------------------------------------------------------------------------------------------------------------------------------------------------------------------------------------------------------------------------------------------------------------------------------------------------------------------------------------------------------------------------------------------------------------------------------------------------------------------------------------------------------------------------------------------------|---------------------------------------------------------------------------------------------------------------------------------------------------------|---------|
| <b>C*05</b><br>1 common<br>349 rare                                                                                                                                                                                                                                                                                                                                                                                                                                                                                                                                                                                                                                                                                                                                                                                                                                                                                                                                                                                                                                                                                                                                                                                                                                                                                                                                                                                                                                                                  | <b>C* 05:01:01:01</b> , <i>05:01:01:02d</i> , 05:01:01:03e, 05:01:01:04e, 05:01:01:05e, 05:01:01:06e, 05:01:01:07e, 05:01:01:08e, 05:01:01:09e, 05:01:01:10e, 05:01:01:11e, 05:01:01:12e, 05:01:01:13e, 05:01:01:14e, 05:01:01:15e, 05:01:01:16e, 05:01:01:17e, 05:01:01:18e, 05:01:01:19e, 05:01:01:20e, 05:01:01:21e, 05:01:01:22e, 05:01:01:23e, 05:01:01:24e, 05:01:01:25e, 05:01:01:26e, 05:01:01:27e, 05:01:01:28e, 05:01:01:29e, 05:01:01:30e, 05:01:01:31e, 05:01:01:32e, 05:01:01:33e, 05:01:01:34e, 05:01:01:35e, 05:01:01:36e, 05:01:01:37e, 05:01:01:38e, 05:01:01:39e, 05:01:01:40e, 05:01:01:41e, 05:01:01:42e, 05:01:01:43e, 05:01:01:44e, 05:01:01:45e, 05:01:01:46e, 05:01:01:47e, 05:01:01:48e, 05:01:01:49e, 05:01:01:50e, 05:01:01:51e, 05:01:01:52e, 05:01:01:53Qe, 05:01:02e, 05:01:03e, 05:01:04e, 05:01:05e, 05:01:06e, 05:01:07e, 05:01:08e, 05:01:09e, 05:01:10e, 05:01:11e, 05:01:12e, 05:01:13e, 05:01:14e, 05:01:15e, 05:01:16e, 05:01:17e, 05:01:18e, 05:01:19e, 05:01:20e, 05:01:21e, 05:01:22e, 05:01:23e, 05:01:24e, 05:01:25e, 05:01:26e, 05:01:27e, 05:01:28e, 05:01:29e, 05:01:30e, 05:01:31e, 05:01:32e, 05:01:33e, 05:01:34e, 05:01:35e, 05:01:36e, 05:01:37e, 05:01:38e, 05:01:39e, 05:01:40e, 05:01:41e, 05:01:42e, 05:01:43e, 05:01:44e, 05:01:45e, 05:01:46e, 05:01:47e, 05:01:48e, 05:01:49e, 05:01:50e, 05:01:51e, 05:01:52e, 05:01:53e, 05:01:54e, 05:01:55e, 05:01:56e, 05:01:57e | 05:01P                                                                                                                                                  | Cw5     |
|                                                                                                                                                                                                                                                                                                                                                                                                                                                                                                                                                                                                                                                                                                                                                                                                                                                                                                                                                                                                                                                                                                                                                                                                                                                                                                                                                                                                                                                                                                      | <i>C* 05:07Nd</i>                                                                                                                                                                                                                                                                                                                                                                                                                                                                                                                                                                                                                                                                                                                                                                                                                                                                                                                                                                                                                                                                                                                                                                                                                                                                                                                                                                                                               | -                                                                                                                                                       | Null    |
|                                                                                                                                                                                                                                                                                                                                                                                                                                                                                                                                                                                                                                                                                                                                                                                                                                                                                                                                                                                                                                                                                                                                                                                                                                                                                                                                                                                                                                                                                                      | <b>C* 05:03e</b> , <i>05:04:01d</i> , 05:04:02e, <i>05:05:01d</i> , 05:05:02e, <i>05:09:01d</i> , 05:09:02e, 05:09:03e, 05:18:01e, 05:18:02e, 05:18:03e, 05:18:04e, 05:18:05e, 05:18:06e, 05:22:01e, 05:22:02e, 05:29:01e, 05:29:02e, 05:37e, 05:44:01e, 05:44:02e, 05:53e, 05:58:02e, 05:58:04e, 05:64:01e, 05:64:02e, 05:93e, 05:103:01e, 05:103:02e, 05:106:01e, 05:106:02e, 05:108e, 05:145e, 05:158e, 05:161e, 05:171:01:01e, 05:171:01:02e, 05:172e, 05:178:01:01e, 05:178:01:02e, 05:179e, 05:187e, 05:192e, 05:199e, 05:204e, 05:212e, 05:216:01:01e, 05:216:01:02e, 05:221e, 05:222e, 05:224e, 05:225e, 05:226e, 05:231e, 05:232e, 05:242e, 05:243e, 05:246e                                                                                                                                                                                                                                                                                                                                                                                                                                                                                                                                                                                                                                                                                                                                                           | 05:01P<br>05:04P<br>05:05P<br>05:09P<br>05:18P<br>05:22P<br>05:29P<br>05:44P<br>05:58P<br>05:64P<br>05:103P<br>05:106P<br>05:171P<br>05:178P<br>05:216P | -       |
| <b>C* 05:06e</b> , <i>05:08d</i> , <i>05:10d</i> , 05:11e, 05:12e, 05:13e, <i>05:14d</i> , 05:15e, 05:19e, 05:21e, 05:23e, 05:24e, 05:25e, 05:26e, 05:27e, 05:28e, 05:30e, 05:31e, 05:32e, 05:33e, 05:34e, 05:35e, 05:38e, 05:39e, 05:40e, 05:41e, 05:42e, 05:45e, 05:47e, 05:48Ne, 05:49e, 05:50e, 05:51Qe, 05:52e, 05:54e, 05:55e, 05:56e, 05:57e, 05:59e, 05:60e, 05:61e, 05:62e, 05:63e, 05:65e, 05:66e, 05:67e, 05:69e, 05:70e, 05:71e, 05:72e, 05:73e, 05:74e, 05:75e, 05:77e, 05:80e, 05:81e, 05:82e, 05:83e, 05:84e, 05:86e, 05:87e, 05:88e, 05:89e, 05:90e, 05:91Ne, 05:92Ne, 05:94e, 05:95e, 05:96e, 05:97e, 05:98e, 05:99Ne, 05:100e, 05:101e, 05:102e, 05:104e, 05:109e, 05:110e, 05:111e, 05:112e, 05:113Ne, 05:114e, 05:116e, 05:117e, 05:118e, 05:119e, 05:120e, 05:121e, 05:122e, 05:123e, 05:124e, 05:125e, 05:126e, 05:127e, 05:128Ne, 05:129e, 05:130e, 05:131e, 05:133e, 05:135e, 05:136e, 05:137e, 05:138e, 05:139e, 05:140e, 05:141e, 05:142e, 05:144e, 05:146e, 05:147e, 05:149e, 05:150e, 05:151e, 05:152e, 05:153Ne, 05:154Ne, 05:155e, 05:156e, 05:157e, 05:159e, 05:160e, 05:162e, 05:163e, 05:164e, 05:165e, 05:166e, 05:167e, 05:168e, 05:169Ne, 05:170e, 05:173e, 05:174e, 05:175Ne, 05:176e, 05:177e, 05:180Ne, 05:181e, 05:182e, 05:183e, 05:184e, 05:185e, 05:186e, 05:188e, 05:189e, 05:190e, 05:191e, 05:193e, 05:194e, 05:195e, 05:196e, 05:197e, 05:198e, 05:202Qe, 05:203e, 05:205e, 05:207e, 05:208Ne, 05:209e, 05:210e, 05:211e, 05:213Ne, 05:214e, 05:215e, | -                                                                                                                                                                                                                                                                                                                                                                                                                                                                                                                                                                                                                                                                                                                                                                                                                                                                                                                                                                                                                                                                                                                                                                                                                                                                                                                                                                                                                               | -                                                                                                                                                       |         |

|                                                                                                      |                                                                                                                                                                                                                                                                                                                                                                                                                                                                                                                                                                                                                                                                                                                                                                                                                                                                                                                                                                                                                                                                                                                                                                                                                                                                                                                                                                                                                                                                                                                                                                                                                      |                                                                                                                                    |      |
|------------------------------------------------------------------------------------------------------|----------------------------------------------------------------------------------------------------------------------------------------------------------------------------------------------------------------------------------------------------------------------------------------------------------------------------------------------------------------------------------------------------------------------------------------------------------------------------------------------------------------------------------------------------------------------------------------------------------------------------------------------------------------------------------------------------------------------------------------------------------------------------------------------------------------------------------------------------------------------------------------------------------------------------------------------------------------------------------------------------------------------------------------------------------------------------------------------------------------------------------------------------------------------------------------------------------------------------------------------------------------------------------------------------------------------------------------------------------------------------------------------------------------------------------------------------------------------------------------------------------------------------------------------------------------------------------------------------------------------|------------------------------------------------------------------------------------------------------------------------------------|------|
|                                                                                                      | 05:217e, 05:218e, 05:219e, 05:220e, 05:223e, 05:227e, 05:228e, 05:229e, 05:230e, 05:233e, 05:234e, 05:235e, 05:236e, 05:237e, 05:238e, 05:239Ne, 05:240e, 05:244Ne, 05:245e                                                                                                                                                                                                                                                                                                                                                                                                                                                                                                                                                                                                                                                                                                                                                                                                                                                                                                                                                                                                                                                                                                                                                                                                                                                                                                                                                                                                                                          |                                                                                                                                    |      |
| <b>C*05</b><br>1 common<br>331 rare                                                                  | <b>C* 05:01:01:01</b> , 05:01:01:02d, 05:01:01:03e, 05:01:01:04e, 05:01:01:05e, 05:01:01:06e, 05:01:01:07e, 05:01:01:08e, 05:01:01:09e, 05:01:01:10e, 05:01:01:11e, 05:01:01:12e, 05:01:01:13e, 05:01:01:14e, 05:01:01:15e, 05:01:01:16e, 05:01:01:17e, 05:01:01:18e, 05:01:01:19e, 05:01:01:20e, 05:01:01:21e, 05:01:01:22e, 05:01:01:23e, 05:01:01:24e, 05:01:01:25e, 05:01:01:26e, 05:01:01:27e, 05:01:01:28e, 05:01:01:29e, 05:01:01:30e, 05:01:01:31e, 05:01:01:32e, 05:01:01:33e, 05:01:01:34e, 05:01:01:35e, 05:01:01:36e, 05:01:01:37e, 05:01:01:38e, 05:01:01:39e, 05:01:01:40e, 05:01:01:41e, 05:01:01:42e, 05:01:01:43e, 05:01:01:44e, 05:01:01:45e, 05:01:01:46e, 05:01:01:47e, 05:01:01:48e, 05:01:01:49e, 05:01:01:50e, 05:01:01:51e, 05:01:01:52e, 05:01:01:53Qe, 05:01:03e, 05:01:04e, 05:01:05e, 05:01:06e, 05:01:07e, 05:01:08e, 05:01:09e, 05:01:10e, 05:01:11e, 05:01:12e, 05:01:13e, 05:01:14e, 05:01:15e, 05:01:16e, 05:01:17e, 05:01:19e, 05:01:21e, 05:01:22e, 05:01:23e, 05:01:24e, 05:01:25e, 05:01:26e, 05:01:27e, 05:01:28e, 05:01:29e, 05:01:30e, 05:01:31e, 05:01:32e, 05:01:33e, 05:01:34e, 05:01:35e, 05:01:36e, 05:01:37e, 05:01:38e, 05:01:39e, 05:01:40e, 05:01:41e, 05:01:42e, 05:01:43e, 05:01:44e, 05:01:45e, 05:01:46e, 05:01:47e, 05:01:48e, 05:01:49e, 05:01:50e, 05:01:51e, 05:01:52e, 05:01:53e, 05:01:54e, 05:01:55e, 05:01:56e, 05:01:57e                                                                                                                                                                                                                               | 05:01P                                                                                                                             | Cw5  |
|                                                                                                      | <i>C* 05:07Nd</i>                                                                                                                                                                                                                                                                                                                                                                                                                                                                                                                                                                                                                                                                                                                                                                                                                                                                                                                                                                                                                                                                                                                                                                                                                                                                                                                                                                                                                                                                                                                                                                                                    | -                                                                                                                                  | Null |
|                                                                                                      | <b>C* 05:03e</b> , 05:04:01d, 05:05:01d, 05:05:02e, 05:18:01e, 05:18:03e, 05:22:01e, 05:22:02e, 05:29:01e, 05:29:02e, 05:37e, 05:44:01e, 05:44:02e, 05:53e, 05:58:02e, 05:58:04e, 05:64:01e, 05:64:02e, 05:93e, 05:106:01e, 05:108e, 05:145e, 05:158e, 05:161e, 05:171:01:01e, 05:171:01:02e, 05:172e, 05:178:01:01e, 05:178:01:02e, 05:179e, 05:187e, 05:192e, 05:199e, 05:204e, 05:212e, 05:216:01:01e, 05:216:01:02e, 05:221e, 05:222e, 05:224e, 05:225e, 05:226e, 05:231e, 05:232e, 05:242e, 05:243e, 05:246e                                                                                                                                                                                                                                                                                                                                                                                                                                                                                                                                                                                                                                                                                                                                                                                                                                                                                                                                                                                                                                                                                                    | 05:01P<br>05:04P<br>05:05P<br>05:18P<br>05:22P<br>05:29P<br>05:44P<br>05:58P<br>05:64P<br>05:106P<br>05:171P<br>05:178P<br>05:216P | -    |
|                                                                                                      | <b>C* 05:06e</b> , 05:08d, 05:10d, 05:11e, 05:12e, 05:13e, 05:14d, 05:15e, 05:19e, 05:20e, 05:21e, 05:23e, 05:24e, 05:25e, 05:26e, 05:27e, 05:28e, 05:30e, 05:31e, 05:32e, 05:33e, 05:34e, 05:35e, 05:38e, 05:39e, 05:40e, 05:41e, 05:42e, 05:45e, 05:47e, 05:48Ne, 05:49e, 05:50e, 05:51Qe, 05:54e, 05:55e, 05:56e, 05:57e, 05:59e, 05:60e, 05:61e, 05:62e, 05:63e, 05:65e, 05:66e, 05:67e, 05:69e, 05:70e, 05:71e, 05:72e, 05:73e, 05:74e, 05:75e, 05:77e, 05:80e, 05:81e, 05:82e, 05:83e, 05:84e, 05:86e, 05:87e, 05:88e, 05:89e, 05:90e, 05:91Ne, 05:92Ne, 05:94e, 05:95e, 05:96e, 05:97e, 05:98e, 05:99Ne, 05:100e, 05:101e, 05:102e, 05:104e, 05:109e, 05:110e, 05:111e, 05:112e, 05:113Ne, 05:114e, 05:116e, 05:117e, 05:118e, 05:119e, 05:120e, 05:121e, 05:122e, 05:123e, 05:124e, 05:125e, 05:126e, 05:127e, 05:128Ne, 05:129e, 05:130e, 05:131e, 05:135e, 05:136e, 05:137e, 05:138e, 05:139e, 05:140e, 05:141e, 05:142e, 05:144e, 05:146e, 05:149e, 05:150e, 05:151e, 05:152e, 05:153Ne, 05:154Ne, 05:155e, 05:156e, 05:157e, 05:159e, 05:160e, 05:162e, 05:163e, 05:164e, 05:165e, 05:166e, 05:167e, 05:168e, 05:169Ne, 05:170e, 05:173e, 05:174e, 05:175Ne, 05:176e, 05:177e, 05:180Ne, 05:181e, 05:182e, 05:183e, 05:184e, 05:185e, 05:186e, 05:188e, 05:189e, 05:190e, 05:191e, 05:193e, 05:194e, 05:195e, 05:196e, 05:197e, 05:198e, 05:202Qe, 05:203e, 05:205e, 05:208Ne, 05:209e, 05:210e, 05:211e, 05:213Ne, 05:214e, 05:217e, 05:218e, 05:219e, 05:220e, 05:223e, 05:227e, 05:228e, 05:229e, 05:230e, 05:233e, 05:234e, 05:235e, 05:236e, 05:237e, 05:238e, 05:239Ne, 05:240e, 05:244Ne, 05:245e | -                                                                                                                                  |      |
| <i>This genotype consists of alleles from a single group.<br/>This genotype was MANUALLY chosen.</i> |                                                                                                                                                                                                                                                                                                                                                                                                                                                                                                                                                                                                                                                                                                                                                                                                                                                                                                                                                                                                                                                                                                                                                                                                                                                                                                                                                                                                                                                                                                                                                                                                                      |                                                                                                                                    |      |

OR

| ALLELE GROUP                                                                                                                                                                                                                                                                                                                                                                                                                                                                                                                                                                                                                                                                                                                                                                                                                                                                                                                                                                                                                                                                                                                                                                                                                                                                                                                                                                                                                                                                                                                                                                                                           | ALLELES                                                                                                                                                                                                                                                                                                                                                                                                                                                                                                                                                                                                                                                                                                                                                                                                                                                                                                                                                                                                                                                                                                                                                                                                                                                                                                                                                                                                      | P GROUP                                                                                                                 | ANTIGEN |
|------------------------------------------------------------------------------------------------------------------------------------------------------------------------------------------------------------------------------------------------------------------------------------------------------------------------------------------------------------------------------------------------------------------------------------------------------------------------------------------------------------------------------------------------------------------------------------------------------------------------------------------------------------------------------------------------------------------------------------------------------------------------------------------------------------------------------------------------------------------------------------------------------------------------------------------------------------------------------------------------------------------------------------------------------------------------------------------------------------------------------------------------------------------------------------------------------------------------------------------------------------------------------------------------------------------------------------------------------------------------------------------------------------------------------------------------------------------------------------------------------------------------------------------------------------------------------------------------------------------------|--------------------------------------------------------------------------------------------------------------------------------------------------------------------------------------------------------------------------------------------------------------------------------------------------------------------------------------------------------------------------------------------------------------------------------------------------------------------------------------------------------------------------------------------------------------------------------------------------------------------------------------------------------------------------------------------------------------------------------------------------------------------------------------------------------------------------------------------------------------------------------------------------------------------------------------------------------------------------------------------------------------------------------------------------------------------------------------------------------------------------------------------------------------------------------------------------------------------------------------------------------------------------------------------------------------------------------------------------------------------------------------------------------------|-------------------------------------------------------------------------------------------------------------------------|---------|
| <b>C*05</b><br>1 common<br>333 rare                                                                                                                                                                                                                                                                                                                                                                                                                                                                                                                                                                                                                                                                                                                                                                                                                                                                                                                                                                                                                                                                                                                                                                                                                                                                                                                                                                                                                                                                                                                                                                                    | <b>C* 05:01:01:01</b> , 05:01:01:02d, 05:01:01:03e, 05:01:01:04e, 05:01:01:05e, 05:01:01:06e, 05:01:01:07e, 05:01:01:08e, 05:01:01:09e, 05:01:01:10e, 05:01:01:11e, 05:01:01:12e, 05:01:01:13e, 05:01:01:14e, 05:01:01:15e, 05:01:01:16e, 05:01:01:17e, 05:01:01:18e, 05:01:01:19e, 05:01:01:20e, 05:01:01:21e, 05:01:01:22e, 05:01:01:23e, 05:01:01:24e, 05:01:01:25e, 05:01:01:26e, 05:01:01:27e, 05:01:01:28e, 05:01:01:29e, 05:01:01:30e, 05:01:01:31e, 05:01:01:32e, 05:01:01:33e, 05:01:01:34e, 05:01:01:35e, 05:01:01:36e, 05:01:01:37e, 05:01:01:38e, 05:01:01:39e, 05:01:01:40e, 05:01:01:41e, 05:01:01:42e, 05:01:01:43e, 05:01:01:44e, 05:01:01:45e, 05:01:01:46e, 05:01:01:47e, 05:01:01:48e, 05:01:01:49e, 05:01:01:50e, 05:01:01:51e, 05:01:01:52e, 05:01:01:53Qe, 05:01:02e, 05:01:03e, 05:01:04e, 05:01:05e, 05:01:06e, 05:01:07e, 05:01:08e, 05:01:09e, 05:01:10e, 05:01:11e, 05:01:13e, 05:01:14e, 05:01:15e, 05:01:16e, 05:01:17e, 05:01:18e, 05:01:19e, 05:01:20e, 05:01:21e, 05:01:22e, 05:01:23e, 05:01:24e, 05:01:25e, 05:01:26e, 05:01:27e, 05:01:28e, 05:01:29e, 05:01:30e, 05:01:31e, 05:01:32e, 05:01:33e, 05:01:34e, 05:01:35e, 05:01:36e, 05:01:37e, 05:01:38e, 05:01:39e, 05:01:40e, 05:01:41e, 05:01:42e, 05:01:43e, 05:01:44e, 05:01:45e, 05:01:46e, 05:01:47e, 05:01:48e, 05:01:49e, 05:01:50e, 05:01:51e, 05:01:52e, 05:01:53e, 05:01:54e, 05:01:55e, 05:01:56e, 05:01:57e | 05:01P                                                                                                                  | Cw5     |
|                                                                                                                                                                                                                                                                                                                                                                                                                                                                                                                                                                                                                                                                                                                                                                                                                                                                                                                                                                                                                                                                                                                                                                                                                                                                                                                                                                                                                                                                                                                                                                                                                        | <b>C* 05:07Nd</b>                                                                                                                                                                                                                                                                                                                                                                                                                                                                                                                                                                                                                                                                                                                                                                                                                                                                                                                                                                                                                                                                                                                                                                                                                                                                                                                                                                                            | -                                                                                                                       | Null    |
|                                                                                                                                                                                                                                                                                                                                                                                                                                                                                                                                                                                                                                                                                                                                                                                                                                                                                                                                                                                                                                                                                                                                                                                                                                                                                                                                                                                                                                                                                                                                                                                                                        | <b>C* 05:03e</b> , 05:04:01d, 05:04:02e, 05:05:01d, 05:05:02e, 05:09:01d, 05:09:02e, 05:09:03e, 05:22:01e, 05:22:02e, 05:29:01e, 05:37e, 05:44:01e, 05:44:02e, 05:53e, 05:58:02e, 05:58:04e, 05:64:01e, 05:64:02e, 05:93e, 05:108e, 05:145e, 05:158e, 05:161e, 05:171:01:01e, 05:171:01:02e, 05:172e, 05:178:01:01e, 05:178:01:02e, 05:179e, 05:187e, 05:192e, 05:199e, 05:204e, 05:212e, 05:216:01:01e, 05:216:01:02e, 05:221e, 05:222e, 05:224e, 05:225e, 05:226e, 05:231e, 05:232e, 05:242e, 05:243e, 05:246e                                                                                                                                                                                                                                                                                                                                                                                                                                                                                                                                                                                                                                                                                                                                                                                                                                                                                             | 05:01P<br>05:04P<br>05:05P<br>05:09P<br>05:22P<br>05:29P<br>05:44P<br>05:58P<br>05:64P<br>05:171P<br>05:178P<br>05:216P | -       |
| <b>C* 05:06e</b> , 05:08d, 05:10d, 05:11e, 05:13e, 05:14d, 05:15e, 05:19e, 05:21e, 05:23e, 05:24e, 05:25e, 05:26e, 05:27e, 05:28e, 05:30e, 05:31e, 05:32e, 05:33e, 05:34e, 05:35e, 05:38e, 05:39e, 05:40e, 05:41e, 05:42e, 05:45e, 05:47e, 05:48Ne, 05:49e, 05:50e, 05:51Qe, 05:52e, 05:54e, 05:55e, 05:56e, 05:57e, 05:59e, 05:60e, 05:61e, 05:62e, 05:63e, 05:65e, 05:66e, 05:67e, 05:69e, 05:70e, 05:71e, 05:72e, 05:73e, 05:74e, 05:75e, 05:77e, 05:80e, 05:81e, 05:82e, 05:83e, 05:84e, 05:86e, 05:87e, 05:88e, 05:89e, 05:90e, 05:91Ne, 05:92Ne, 05:94e, 05:95e, 05:96e, 05:98e, 05:99Ne, 05:100e, 05:101e, 05:102e, 05:104e, 05:109e, 05:110e, 05:111e, 05:112e, 05:113Ne, 05:114e, 05:116e, 05:117e, 05:118e, 05:119e, 05:120e, 05:121e, 05:122e, 05:123e, 05:124e, 05:125e, 05:126e, 05:127e, 05:128Ne, 05:129e, 05:130e, 05:131e, 05:133e, 05:135e, 05:136e, 05:137e, 05:138e, 05:139e, 05:140e, 05:141e, 05:142e, 05:144e, 05:146e, 05:147e, 05:149e, 05:150e, 05:152e, 05:153Ne, 05:154Ne, 05:155e, 05:156e, 05:157e, 05:159e, 05:160e, 05:162e, 05:163e, 05:164e, 05:165e, 05:166e, 05:167e, 05:168e, 05:169Ne, 05:170e, 05:173e, 05:174e, 05:175Ne, 05:176e, 05:177e, 05:180Ne, 05:181e, 05:182e, 05:183e, 05:184e, 05:185e, 05:186e, 05:188e, 05:189e, 05:190e, 05:191e, 05:193e, 05:194e, 05:195e, 05:196e, 05:197e, 05:198e, 05:202Qe, 05:203e, 05:205e, 05:207e, 05:208Ne, 05:209e, 05:210e, 05:211e, 05:213Ne, 05:214e, 05:215e, 05:217e, 05:218e, 05:219e, 05:220e, 05:223e, 05:227e, 05:229e, 05:230e, 05:233e, 05:234e, 05:235e, 05:236e, 05:237e, 05:238e, 05:239Ne, 05:240e, 05:244Ne, 05:245e | -                                                                                                                                                                                                                                                                                                                                                                                                                                                                                                                                                                                                                                                                                                                                                                                                                                                                                                                                                                                                                                                                                                                                                                                                                                                                                                                                                                                                            |                                                                                                                         |         |
| <b>C*08</b><br>6 rare                                                                                                                                                                                                                                                                                                                                                                                                                                                                                                                                                                                                                                                                                                                                                                                                                                                                                                                                                                                                                                                                                                                                                                                                                                                                                                                                                                                                                                                                                                                                                                                                  | <b>C* 08:02:18e</b> , 08:02:21e                                                                                                                                                                                                                                                                                                                                                                                                                                                                                                                                                                                                                                                                                                                                                                                                                                                                                                                                                                                                                                                                                                                                                                                                                                                                                                                                                                              | 08:02P                                                                                                                  | Cw8     |
|                                                                                                                                                                                                                                                                                                                                                                                                                                                                                                                                                                                                                                                                                                                                                                                                                                                                                                                                                                                                                                                                                                                                                                                                                                                                                                                                                                                                                                                                                                                                                                                                                        | <b>C* 08:13d</b> , 08:18e, 08:94e, 08:146e                                                                                                                                                                                                                                                                                                                                                                                                                                                                                                                                                                                                                                                                                                                                                                                                                                                                                                                                                                                                                                                                                                                                                                                                                                                                                                                                                                   | -                                                                                                                       | -       |
| <i>One side of this genotype requires a RARE allele, which makes this call less likely.</i>                                                                                                                                                                                                                                                                                                                                                                                                                                                                                                                                                                                                                                                                                                                                                                                                                                                                                                                                                                                                                                                                                                                                                                                                                                                                                                                                                                                                                                                                                                                            |                                                                                                                                                                                                                                                                                                                                                                                                                                                                                                                                                                                                                                                                                                                                                                                                                                                                                                                                                                                                                                                                                                                                                                                                                                                                                                                                                                                                              |                                                                                                                         |         |

OR

| ALLELE GROUP                                                                                                                                                                                                                                                                                                                                                                                                                                                                                                                                                                                                                                                                                                                                                                                                                                                                                                                                                                                                                                                                                                                                                                                                                                                                                                                        | ALLELES                                                                                                                                                                                                                                                                                                                                                                                                                                                                                                                                                                                                                                                                                                                                                                                                                                                                                                                                                                                                                                                                                                                                                                                                                                                                                                                                                                                        | P GROUP                                                                                                       | ANTIGEN |
|-------------------------------------------------------------------------------------------------------------------------------------------------------------------------------------------------------------------------------------------------------------------------------------------------------------------------------------------------------------------------------------------------------------------------------------------------------------------------------------------------------------------------------------------------------------------------------------------------------------------------------------------------------------------------------------------------------------------------------------------------------------------------------------------------------------------------------------------------------------------------------------------------------------------------------------------------------------------------------------------------------------------------------------------------------------------------------------------------------------------------------------------------------------------------------------------------------------------------------------------------------------------------------------------------------------------------------------|------------------------------------------------------------------------------------------------------------------------------------------------------------------------------------------------------------------------------------------------------------------------------------------------------------------------------------------------------------------------------------------------------------------------------------------------------------------------------------------------------------------------------------------------------------------------------------------------------------------------------------------------------------------------------------------------------------------------------------------------------------------------------------------------------------------------------------------------------------------------------------------------------------------------------------------------------------------------------------------------------------------------------------------------------------------------------------------------------------------------------------------------------------------------------------------------------------------------------------------------------------------------------------------------------------------------------------------------------------------------------------------------|---------------------------------------------------------------------------------------------------------------|---------|
| <b>C*04</b><br><br>36 rare                                                                                                                                                                                                                                                                                                                                                                                                                                                                                                                                                                                                                                                                                                                                                                                                                                                                                                                                                                                                                                                                                                                                                                                                                                                                                                          | C* 04:01:21e, 04:01:28e, 04:01:39e, 04:01:46e, 04:01:61e, 04:01:63e, 04:01:65e, 04:01:91e                                                                                                                                                                                                                                                                                                                                                                                                                                                                                                                                                                                                                                                                                                                                                                                                                                                                                                                                                                                                                                                                                                                                                                                                                                                                                                      | 04:01P                                                                                                        | Cw4     |
|                                                                                                                                                                                                                                                                                                                                                                                                                                                                                                                                                                                                                                                                                                                                                                                                                                                                                                                                                                                                                                                                                                                                                                                                                                                                                                                                     | C* 04:103:01e, 04:103:02e, 04:304:01e, 04:304:02e, 04:355e, 04:427e                                                                                                                                                                                                                                                                                                                                                                                                                                                                                                                                                                                                                                                                                                                                                                                                                                                                                                                                                                                                                                                                                                                                                                                                                                                                                                                            | 04:103P<br>04:304P<br>04:355P                                                                                 | -       |
|                                                                                                                                                                                                                                                                                                                                                                                                                                                                                                                                                                                                                                                                                                                                                                                                                                                                                                                                                                                                                                                                                                                                                                                                                                                                                                                                     | C* 04:56e, 04:71e, 04:90e, 04:131e, 04:134e, 04:140e, 04:190e, 04:196e, 04:198e, 04:206e, 04:213e, 04:217Ne, 04:219e, 04:243e, 04:248e, 04:271e, 04:288e, 04:311e, 04:316e, 04:317e, 04:415e, 04:436Ne                                                                                                                                                                                                                                                                                                                                                                                                                                                                                                                                                                                                                                                                                                                                                                                                                                                                                                                                                                                                                                                                                                                                                                                         | -                                                                                                             | -       |
| <b>C*05</b><br><br>1 common<br>323 rare                                                                                                                                                                                                                                                                                                                                                                                                                                                                                                                                                                                                                                                                                                                                                                                                                                                                                                                                                                                                                                                                                                                                                                                                                                                                                             | <b>C* 05:01:01:01</b> , <i>05:01:01:02d</i> , 05:01:01:03e, 05:01:01:04e, 05:01:01:05e, 05:01:01:06e, 05:01:01:07e, 05:01:01:08e, 05:01:01:09e, 05:01:01:10e, 05:01:01:11e, 05:01:01:12e, 05:01:01:13e, 05:01:01:14e, 05:01:01:15e, 05:01:01:16e, 05:01:01:17e, 05:01:01:18e, 05:01:01:19e, 05:01:01:20e, 05:01:01:21e, 05:01:01:22e, 05:01:01:23e, 05:01:01:24e, 05:01:01:25e, 05:01:01:26e, 05:01:01:27e, 05:01:01:28e, 05:01:01:29e, 05:01:01:30e, 05:01:01:31e, 05:01:01:32e, 05:01:01:33e, 05:01:01:34e, 05:01:01:35e, 05:01:01:36e, 05:01:01:37e, 05:01:01:38e, 05:01:01:39e, 05:01:01:40e, 05:01:01:41e, 05:01:01:42e, 05:01:01:43e, 05:01:01:44e, 05:01:01:45e, 05:01:01:46e, 05:01:01:47e, 05:01:01:48e, 05:01:01:49e, 05:01:01:50e, 05:01:01:51e, 05:01:01:52e, 05:01:01:53Qe, 05:01:03e, 05:01:04e, 05:01:05e, 05:01:06e, 05:01:07e, 05:01:08e, 05:01:09e, 05:01:10e, 05:01:11e, 05:01:12e, 05:01:13e, 05:01:14e, 05:01:15e, 05:01:16e, 05:01:17e, 05:01:19e, 05:01:21e, 05:01:22e, 05:01:23e, 05:01:24e, 05:01:25e, 05:01:26e, 05:01:27e, 05:01:28e, 05:01:29e, 05:01:30e, 05:01:31e, 05:01:32e, 05:01:33e, 05:01:34e, 05:01:35e, 05:01:36e, 05:01:37e, 05:01:38e, 05:01:39e, 05:01:40e, 05:01:41e, 05:01:42e, 05:01:43e, 05:01:44e, 05:01:45e, 05:01:46e, 05:01:47e, 05:01:48e, 05:01:49e, 05:01:50e, 05:01:51e, 05:01:52e, 05:01:53e, 05:01:54e, 05:01:55e, 05:01:56e, 05:01:57e | 05:01P                                                                                                        | Cw5     |
|                                                                                                                                                                                                                                                                                                                                                                                                                                                                                                                                                                                                                                                                                                                                                                                                                                                                                                                                                                                                                                                                                                                                                                                                                                                                                                                                     | <i>C* 05:07Nd</i>                                                                                                                                                                                                                                                                                                                                                                                                                                                                                                                                                                                                                                                                                                                                                                                                                                                                                                                                                                                                                                                                                                                                                                                                                                                                                                                                                                              | -                                                                                                             | Null    |
|                                                                                                                                                                                                                                                                                                                                                                                                                                                                                                                                                                                                                                                                                                                                                                                                                                                                                                                                                                                                                                                                                                                                                                                                                                                                                                                                     | C* 05:03e, <i>05:04:01d</i> , <i>05:05:01d</i> , 05:05:02e, 05:22:01e, 05:22:02e, 05:29:01e, 05:29:02e, 05:37e, 05:44:01e, 05:44:02e, 05:53e, 05:58:02e, 05:58:04e, 05:64:01e, 05:64:02e, 05:93e, 05:108e, 05:145e, 05:158e, 05:161e, 05:171:01:01e, 05:171:01:02e, 05:172e, 05:178:01:01e, 05:178:01:02e, 05:179e, 05:187e, 05:192e, 05:199e, 05:204e, 05:212e, 05:216:01:01e, 05:216:01:02e, 05:221e, 05:222e, 05:224e, 05:225e, 05:226e, 05:231e, 05:232e, 05:242e, 05:243e, 05:246e                                                                                                                                                                                                                                                                                                                                                                                                                                                                                                                                                                                                                                                                                                                                                                                                                                                                                                        | 05:01P<br>05:04P<br>05:05P<br>05:22P<br>05:29P<br>05:44P<br>05:58P<br>05:64P<br>05:171P<br>05:178P<br>05:216P | -       |
| C* 05:06e, <i>05:08d</i> , <i>05:10d</i> , 05:11e, 05:13e, <i>05:14d</i> , 05:15e, 05:19e, 05:21e, 05:23e, 05:24e, 05:25e, 05:26e, 05:27e, 05:28e, 05:30e, 05:31e, 05:32e, 05:33e, 05:34e, 05:35e, 05:38e, 05:39e, 05:40e, 05:41e, 05:42e, 05:45e, 05:47e, 05:48Ne, 05:49e, 05:50e, 05:51Qe, 05:54e, 05:55e, 05:56e, 05:57e, 05:59e, 05:60e, 05:61e, 05:62e, 05:63e, 05:65e, 05:66e, 05:67e, 05:69e, 05:70e, 05:71e, 05:72e, 05:73e, 05:74e, 05:75e, 05:77e, 05:80e, 05:81e, 05:82e, 05:83e, 05:84e, 05:86e, 05:87e, 05:88e, 05:89e, 05:90e, 05:91Ne, 05:92Ne, 05:94e, 05:95e, 05:96e, 05:98e, 05:99Ne, 05:100e, 05:101e, 05:102e, 05:104e, 05:109e, 05:110e, 05:111e, 05:112e, 05:113Ne, 05:114e, 05:116e, 05:117e, 05:118e, 05:119e, 05:120e, 05:121e, 05:122e, 05:123e, 05:124e, 05:125e, 05:126e, 05:127e, 05:128Ne, 05:129e, 05:130e, 05:131e, 05:135e, 05:136e, 05:137e, 05:138e, 05:139e, 05:140e, 05:141e, 05:142e, 05:144e, 05:146e, 05:149e, 05:150e, 05:152e, 05:153Ne, 05:154Ne, 05:155e, 05:156e, 05:157e, 05:159e, 05:160e, 05:162e, 05:163e, 05:164e, 05:165e, 05:166e, 05:167e, 05:168e, 05:169Ne, 05:170e, 05:173e, 05:174e, 05:175Ne, 05:176e, 05:177e, 05:180Ne, 05:181e, 05:182e, 05:183e, 05:184e, 05:185e, 05:186e, 05:188e, 05:189e, 05:190e, 05:191e, 05:193e, 05:194e, 05:195e, 05:196e, 05:197e, 05:198e, | -                                                                                                                                                                                                                                                                                                                                                                                                                                                                                                                                                                                                                                                                                                                                                                                                                                                                                                                                                                                                                                                                                                                                                                                                                                                                                                                                                                                              | -                                                                                                             |         |

05:202Qe, 05:203e, 05:205e, 05:208Ne, 05:209e, 05:210e, 05:211e, 05:213Ne,  
 05:214e, 05:217e, 05:218e, 05:219e, 05:220e, 05:223e, 05:227e, 05:229e, 05:230e,  
 05:233e, 05:234e, 05:235e, 05:236e, 05:237e, 05:238e, 05:239Ne, 05:240e,  
 05:244Ne, 05:245e

One side of this genotype requires a RARE allele, which makes this call less likely.

OR

| ALLELE GROUP                        | ALLELES                                                                                                                                                                                                                                                                                                                                                                                                                                                                                                                                                                                                                                                                                                                                                                                                                                                                                                                                                                                                                                                                                                                                                                                                                                                                                                                                                                                                                                                                                                                                                                                                                                | P GROUP                                                                                                       | ANTIGEN |
|-------------------------------------|----------------------------------------------------------------------------------------------------------------------------------------------------------------------------------------------------------------------------------------------------------------------------------------------------------------------------------------------------------------------------------------------------------------------------------------------------------------------------------------------------------------------------------------------------------------------------------------------------------------------------------------------------------------------------------------------------------------------------------------------------------------------------------------------------------------------------------------------------------------------------------------------------------------------------------------------------------------------------------------------------------------------------------------------------------------------------------------------------------------------------------------------------------------------------------------------------------------------------------------------------------------------------------------------------------------------------------------------------------------------------------------------------------------------------------------------------------------------------------------------------------------------------------------------------------------------------------------------------------------------------------------|---------------------------------------------------------------------------------------------------------------|---------|
| <b>C*05</b><br>1 common<br>323 rare | <b>C* 05:01:01:01</b> , <i>05:01:01:02d</i> , 05:01:01:03e, 05:01:01:04e, 05:01:01:05e,<br>05:01:01:06e, 05:01:01:07e, 05:01:01:08e, 05:01:01:09e, 05:01:01:10e,<br>05:01:01:11e, 05:01:01:12e, 05:01:01:13e, 05:01:01:14e, 05:01:01:15e,<br>05:01:01:16e, 05:01:01:17e, 05:01:01:18e, 05:01:01:19e, 05:01:01:20e,<br>05:01:01:21e, 05:01:01:22e, 05:01:01:23e, 05:01:01:24e, 05:01:01:25e,<br>05:01:01:26e, 05:01:01:27e, 05:01:01:28e, 05:01:01:29e, 05:01:01:30e,<br>05:01:01:31e, 05:01:01:32e, 05:01:01:33e, 05:01:01:34e, 05:01:01:35e,<br>05:01:01:36e, 05:01:01:37e, 05:01:01:38e, 05:01:01:39e, 05:01:01:40e,<br>05:01:01:41e, 05:01:01:42e, 05:01:01:43e, 05:01:01:44e, 05:01:01:45e,<br>05:01:01:46e, 05:01:01:47e, 05:01:01:48e, 05:01:01:49e, 05:01:01:50e,<br>05:01:01:51e, 05:01:01:52e, 05:01:01:53Qe, 05:01:03e, 05:01:04e, 05:01:05e,<br>05:01:06e, 05:01:07e, 05:01:08e, 05:01:09e, 05:01:10e, 05:01:11e, 05:01:12e,<br>05:01:13e, 05:01:14e, 05:01:15e, 05:01:16e, 05:01:17e, 05:01:19e, 05:01:21e,<br>05:01:22e, 05:01:23e, 05:01:24e, 05:01:25e, 05:01:26e, 05:01:27e, 05:01:28e,<br>05:01:29e, 05:01:30e, 05:01:31e, 05:01:32e, 05:01:33e, 05:01:34e, 05:01:35e,<br>05:01:36e, 05:01:37e, 05:01:38e, 05:01:39e, 05:01:40e, 05:01:41e, 05:01:42e,<br>05:01:43e, 05:01:44e, 05:01:45e, 05:01:46e, 05:01:47e, 05:01:48e, 05:01:49e,<br>05:01:50e, 05:01:51e, 05:01:52e, 05:01:53e, 05:01:54e, 05:01:55e, 05:01:56e,<br>05:01:57e                                                                                                                                                                                   | 05:01P                                                                                                        | Cw5     |
|                                     | <i>C* 05:07Nd</i>                                                                                                                                                                                                                                                                                                                                                                                                                                                                                                                                                                                                                                                                                                                                                                                                                                                                                                                                                                                                                                                                                                                                                                                                                                                                                                                                                                                                                                                                                                                                                                                                                      | -                                                                                                             | Null    |
|                                     | <b>C* 05:03e</b> , <i>05:04:01d</i> , <i>05:05:01d</i> , 05:05:02e, 05:22:01e, 05:22:02e, 05:29:01e,<br>05:29:02e, 05:37e, 05:44:01e, 05:44:02e, 05:53e, 05:58:02e, 05:58:04e, 05:64:01e,<br>05:64:02e, 05:93e, 05:108e, 05:145e, 05:158e, 05:161e, 05:171:01:01e,<br>05:171:01:02e, 05:172e, 05:178:01:01e, 05:178:01:02e, 05:179e, 05:187e, 05:192e,<br>05:199e, 05:204e, 05:212e, 05:216:01:01e, 05:216:01:02e, 05:221e, 05:222e,<br>05:224e, 05:225e, 05:226e, 05:231e, 05:232e, 05:242e, 05:243e, 05:246e                                                                                                                                                                                                                                                                                                                                                                                                                                                                                                                                                                                                                                                                                                                                                                                                                                                                                                                                                                                                                                                                                                                         | 05:01P<br>05:04P<br>05:05P<br>05:22P<br>05:29P<br>05:44P<br>05:58P<br>05:64P<br>05:171P<br>05:178P<br>05:216P | -       |
|                                     | <b>C* 05:06e</b> , <i>05:08d</i> , <i>05:10d</i> , 05:11e, 05:13e, <i>05:14d</i> , 05:15e, 05:19e, 05:21e, 05:23e,<br>05:24e, 05:25e, 05:26e, 05:27e, 05:28e, 05:30e, 05:31e, 05:32e, 05:33e, 05:34e,<br>05:35e, 05:38e, 05:39e, 05:40e, 05:41e, 05:42e, 05:45e, 05:47e, 05:48Ne, 05:49e,<br>05:50e, 05:51Qe, 05:54e, 05:55e, 05:56e, 05:57e, 05:59e, 05:60e, 05:61e, 05:62e,<br>05:63e, 05:65e, 05:66e, 05:67e, 05:69e, 05:70e, 05:71e, 05:72e, 05:73e, 05:74e,<br>05:75e, 05:77e, 05:80e, 05:81e, 05:82e, 05:83e, 05:84e, 05:86e, 05:87e, 05:88e,<br>05:89e, 05:90e, 05:91Ne, 05:92Ne, 05:94e, 05:95e, 05:96e, 05:98e, 05:99Ne,<br>05:100e, 05:101e, 05:102e, 05:104e, 05:109e, 05:110e, 05:111e, 05:112e, 05:113Ne,<br>05:114e, 05:116e, 05:117e, 05:118e, 05:119e, 05:120e, 05:121e, 05:122e, 05:123e,<br>05:124e, 05:125e, 05:126e, 05:127e, 05:128Ne, 05:129e, 05:130e, 05:131e,<br>05:135e, 05:136e, 05:137e, 05:138e, 05:139e, 05:140e, 05:141e, 05:142e, 05:144e,<br>05:146e, 05:149e, 05:150e, 05:152e, 05:153Ne, 05:154Ne, 05:155e, 05:156e,<br>05:157e, 05:159e, 05:160e, 05:162e, 05:163e, 05:164e, 05:165e, 05:166e, 05:167e,<br>05:168e, 05:169Ne, 05:170e, 05:173e, 05:174e, 05:175Ne, 05:176e, 05:177e,<br>05:180Ne, 05:181e, 05:182e, 05:183e, 05:184e, 05:185e, 05:186e, 05:188e,<br>05:189e, 05:190e, 05:191e, 05:193e, 05:194e, 05:195e, 05:196e, 05:197e, 05:198e,<br>05:202Qe, 05:203e, 05:205e, 05:208Ne, 05:209e, 05:210e, 05:211e, 05:213Ne,<br>05:214e, 05:217e, 05:218e, 05:219e, 05:220e, 05:223e, 05:227e, 05:229e, 05:230e,<br>05:233e, 05:234e, 05:235e, 05:236e, 05:237e, 05:238e, 05:239Ne, 05:240e, | -                                                                                                             |         |

|                                                                                             |                     |   |   |
|---------------------------------------------------------------------------------------------|---------------------|---|---|
|                                                                                             | 05:244Ne, 05:245e   |   |   |
| <b>C*16</b><br>2 rare                                                                       | C* 16:140e, 16:153e | - | - |
| <i>One side of this genotype requires a RARE allele, which makes this call less likely.</i> |                     |   |   |

OR

| ALLELE GROUP                        | ALLELES                                                                                                                                                                                                                                                                                                                                                                                                                                                                                                                                                                                                                                                                                                                                                                                                                                                                                                                                                                                                                                                                                                                                                                                                                                                                                                                                                                                                              | P GROUP                                                                                                                 | ANTIGEN |
|-------------------------------------|----------------------------------------------------------------------------------------------------------------------------------------------------------------------------------------------------------------------------------------------------------------------------------------------------------------------------------------------------------------------------------------------------------------------------------------------------------------------------------------------------------------------------------------------------------------------------------------------------------------------------------------------------------------------------------------------------------------------------------------------------------------------------------------------------------------------------------------------------------------------------------------------------------------------------------------------------------------------------------------------------------------------------------------------------------------------------------------------------------------------------------------------------------------------------------------------------------------------------------------------------------------------------------------------------------------------------------------------------------------------------------------------------------------------|-------------------------------------------------------------------------------------------------------------------------|---------|
| <b>C*05</b><br>1 common<br>333 rare | <b>C* 05:01:01:01</b> , <i>05:01:01:02d</i> , 05:01:01:03e, 05:01:01:04e, 05:01:01:05e, 05:01:01:06e, 05:01:01:07e, 05:01:01:08e, 05:01:01:09e, 05:01:01:10e, 05:01:01:11e, 05:01:01:12e, 05:01:01:13e, 05:01:01:14e, 05:01:01:15e, 05:01:01:16e, 05:01:01:17e, 05:01:01:18e, 05:01:01:19e, 05:01:01:20e, 05:01:01:21e, 05:01:01:22e, 05:01:01:23e, 05:01:01:24e, 05:01:01:25e, 05:01:01:26e, 05:01:01:27e, 05:01:01:28e, 05:01:01:29e, 05:01:01:30e, 05:01:01:31e, 05:01:01:32e, 05:01:01:33e, 05:01:01:34e, 05:01:01:35e, 05:01:01:36e, 05:01:01:37e, 05:01:01:38e, 05:01:01:39e, 05:01:01:40e, 05:01:01:41e, 05:01:01:42e, 05:01:01:43e, 05:01:01:44e, 05:01:01:45e, 05:01:01:46e, 05:01:01:47e, 05:01:01:48e, 05:01:01:49e, 05:01:01:50e, 05:01:01:51e, 05:01:01:52e, 05:01:01:53Qe, 05:01:02e, 05:01:03e, 05:01:04e, 05:01:05e, 05:01:06e, 05:01:07e, 05:01:08e, 05:01:09e, 05:01:10e, 05:01:11e, 05:01:13e, 05:01:14e, 05:01:15e, 05:01:16e, 05:01:17e, 05:01:18e, 05:01:19e, 05:01:20e, 05:01:21e, 05:01:22e, 05:01:23e, 05:01:24e, 05:01:25e, 05:01:26e, 05:01:27e, 05:01:28e, 05:01:29e, 05:01:30e, 05:01:31e, 05:01:32e, 05:01:33e, 05:01:34e, 05:01:35e, 05:01:36e, 05:01:37e, 05:01:38e, 05:01:39e, 05:01:40e, 05:01:41e, 05:01:42e, 05:01:43e, 05:01:44e, 05:01:45e, 05:01:46e, 05:01:47e, 05:01:48e, 05:01:49e, 05:01:50e, 05:01:51e, 05:01:52e, 05:01:53e, 05:01:54e, 05:01:55e, 05:01:56e, 05:01:57e | 05:01P                                                                                                                  | Cw5     |
|                                     | <i>C* 05:07Nd</i>                                                                                                                                                                                                                                                                                                                                                                                                                                                                                                                                                                                                                                                                                                                                                                                                                                                                                                                                                                                                                                                                                                                                                                                                                                                                                                                                                                                                    | -                                                                                                                       | Null    |
|                                     | <b>C* 05:03e</b> , <i>05:04:01d</i> , 05:04:02e, <i>05:05:01d</i> , 05:05:02e, <i>05:09:01d</i> , 05:09:02e, 05:09:03e, 05:22:01e, 05:22:02e, 05:29:01e, 05:37e, 05:44:01e, 05:44:02e, 05:53e, 05:58:02e, 05:58:04e, 05:64:01e, 05:64:02e, 05:93e, 05:108e, 05:145e, 05:158e, 05:161e, 05:171:01:01e, 05:171:01:02e, 05:172e, 05:178:01:01e, 05:178:01:02e, 05:179e, 05:187e, 05:192e, 05:199e, 05:204e, 05:212e, 05:216:01:01e, 05:216:01:02e, 05:221e, 05:222e, 05:224e, 05:225e, 05:226e, 05:231e, 05:232e, 05:242e, 05:243e, 05:246e                                                                                                                                                                                                                                                                                                                                                                                                                                                                                                                                                                                                                                                                                                                                                                                                                                                                             | 05:01P<br>05:04P<br>05:05P<br>05:09P<br>05:22P<br>05:29P<br>05:44P<br>05:58P<br>05:64P<br>05:171P<br>05:178P<br>05:216P | -       |
|                                     | <b>C* 05:06e</b> , <i>05:08d</i> , <i>05:10d</i> , 05:11e, 05:13e, <i>05:14d</i> , 05:15e, 05:19e, 05:21e, 05:23e, 05:24e, 05:25e, 05:26e, 05:27e, 05:28e, 05:30e, 05:31e, 05:32e, 05:33e, 05:34e, 05:35e, 05:38e, 05:39e, 05:40e, 05:41e, 05:42e, 05:45e, 05:47e, 05:48Ne, 05:49e, 05:50e, 05:51Qe, 05:52e, 05:54e, 05:55e, 05:56e, 05:57e, 05:59e, 05:60e, 05:61e, 05:62e, 05:63e, 05:65e, 05:66e, 05:67e, 05:69e, 05:70e, 05:71e, 05:72e, 05:73e, 05:74e, 05:75e, 05:77e, 05:80e, 05:81e, 05:82e, 05:83e, 05:84e, 05:86e, 05:87e, 05:88e, 05:89e, 05:90e, 05:91Ne, 05:92Ne, 05:94e, 05:95e, 05:96e, 05:98e, 05:99Ne, 05:100e, 05:101e, 05:102e, 05:104e, 05:109e, 05:110e, 05:111e, 05:112e, 05:113Ne, 05:114e, 05:116e, 05:117e, 05:118e, 05:119e, 05:120e, 05:121e, 05:122e, 05:123e, 05:124e, 05:125e, 05:126e, 05:127e, 05:128Ne, 05:129e, 05:130e, 05:131e, 05:133e, 05:135e, 05:136e, 05:137e, 05:138e, 05:139e, 05:140e, 05:141e, 05:142e, 05:144e, 05:146e, 05:147e, 05:149e, 05:150e, 05:152e, 05:153Ne, 05:154Ne, 05:155e, 05:156e, 05:157e, 05:159e, 05:160e, 05:162e, 05:163e, 05:164e, 05:165e, 05:166e, 05:167e, 05:168e, 05:169Ne, 05:170e, 05:173e, 05:174e, 05:175Ne, 05:176e, 05:177e, 05:180Ne, 05:181e, 05:182e, 05:183e, 05:184e, 05:185e, 05:186e, 05:188e, 05:189e, 05:190e, 05:191e, 05:193e, 05:194e, 05:195e, 05:196e, 05:197e, 05:198e, 05:202Qe, 05:203e, 05:205e, 05:207e,           | -                                                                                                                       |         |

|                                                                                             |                                                                                                                                                                                                                                     |   |   |
|---------------------------------------------------------------------------------------------|-------------------------------------------------------------------------------------------------------------------------------------------------------------------------------------------------------------------------------------|---|---|
|                                                                                             | 05:208Ne, 05:209e, 05:210e, 05:211e, 05:213Ne, 05:214e, 05:215e, 05:217e, 05:218e, 05:219e, 05:220e, 05:223e, 05:227e, 05:229e, 05:230e, 05:233e, 05:234e, 05:235e, 05:236e, 05:237e, 05:238e, 05:239Ne, 05:240e, 05:244Ne, 05:245e |   |   |
| <b>C*07</b>                                                                                 | C* 07:41e                                                                                                                                                                                                                           | - | - |
| 1 rare                                                                                      |                                                                                                                                                                                                                                     |   |   |
| <i>One side of this genotype requires a RARE allele, which makes this call less likely.</i> |                                                                                                                                                                                                                                     |   |   |

OR

| ALLELE GROUP                        | ALLELES                                                                                                                                                                                                                                                                                                                                                                                                                                                                                                                                                                                                                                                                                                                                                                                                                                                                                                                                                                                                                                                                                                                                                                                                                                                                                                                                                                                | P GROUP                                                                                                       | ANTIGEN |
|-------------------------------------|----------------------------------------------------------------------------------------------------------------------------------------------------------------------------------------------------------------------------------------------------------------------------------------------------------------------------------------------------------------------------------------------------------------------------------------------------------------------------------------------------------------------------------------------------------------------------------------------------------------------------------------------------------------------------------------------------------------------------------------------------------------------------------------------------------------------------------------------------------------------------------------------------------------------------------------------------------------------------------------------------------------------------------------------------------------------------------------------------------------------------------------------------------------------------------------------------------------------------------------------------------------------------------------------------------------------------------------------------------------------------------------|---------------------------------------------------------------------------------------------------------------|---------|
| <b>C*05</b><br>1 common<br>323 rare | <b>C* 05:01:01:01</b> , 05:01:01:02d, 05:01:01:03e, 05:01:01:04e, 05:01:01:05e, 05:01:01:06e, 05:01:01:07e, 05:01:01:08e, 05:01:01:09e, 05:01:01:10e, 05:01:01:11e, 05:01:01:12e, 05:01:01:13e, 05:01:01:14e, 05:01:01:15e, 05:01:01:16e, 05:01:01:17e, 05:01:01:18e, 05:01:01:19e, 05:01:01:20e, 05:01:01:21e, 05:01:01:22e, 05:01:01:23e, 05:01:01:24e, 05:01:01:25e, 05:01:01:26e, 05:01:01:27e, 05:01:01:28e, 05:01:01:29e, 05:01:01:30e, 05:01:01:31e, 05:01:01:32e, 05:01:01:33e, 05:01:01:34e, 05:01:01:35e, 05:01:01:36e, 05:01:01:37e, 05:01:01:38e, 05:01:01:39e, 05:01:01:40e, 05:01:01:41e, 05:01:01:42e, 05:01:01:43e, 05:01:01:44e, 05:01:01:45e, 05:01:01:46e, 05:01:01:47e, 05:01:01:48e, 05:01:01:49e, 05:01:01:50e, 05:01:01:51e, 05:01:01:52e, 05:01:01:53Qe, 05:01:03e, 05:01:04e, 05:01:05e, 05:01:06e, 05:01:07e, 05:01:08e, 05:01:09e, 05:01:10e, 05:01:11e, 05:01:12e, 05:01:13e, 05:01:14e, 05:01:15e, 05:01:16e, 05:01:17e, 05:01:19e, 05:01:21e, 05:01:22e, 05:01:23e, 05:01:24e, 05:01:25e, 05:01:26e, 05:01:27e, 05:01:28e, 05:01:29e, 05:01:30e, 05:01:31e, 05:01:32e, 05:01:33e, 05:01:34e, 05:01:35e, 05:01:36e, 05:01:37e, 05:01:38e, 05:01:39e, 05:01:40e, 05:01:41e, 05:01:42e, 05:01:43e, 05:01:44e, 05:01:45e, 05:01:46e, 05:01:47e, 05:01:48e, 05:01:49e, 05:01:50e, 05:01:51e, 05:01:52e, 05:01:53e, 05:01:54e, 05:01:55e, 05:01:56e, 05:01:57e | 05:01P                                                                                                        | Cw5     |
|                                     | <b>C* 05:07Nd</b>                                                                                                                                                                                                                                                                                                                                                                                                                                                                                                                                                                                                                                                                                                                                                                                                                                                                                                                                                                                                                                                                                                                                                                                                                                                                                                                                                                      | -                                                                                                             | Null    |
|                                     | <b>C* 05:03e</b> , 05:04:01d, 05:05:01d, 05:05:02e, 05:22:01e, 05:22:02e, 05:29:01e, 05:29:02e, 05:37e, 05:44:01e, 05:44:02e, 05:53e, 05:58:02e, 05:58:04e, 05:64:01e, 05:64:02e, 05:93e, 05:108e, 05:145e, 05:158e, 05:161e, 05:171:01:01e, 05:171:01:02e, 05:172e, 05:178:01:01e, 05:178:01:02e, 05:179e, 05:187e, 05:192e, 05:199e, 05:204e, 05:212e, 05:216:01:01e, 05:216:01:02e, 05:221e, 05:222e, 05:224e, 05:225e, 05:226e, 05:231e, 05:232e, 05:242e, 05:243e, 05:246e                                                                                                                                                                                                                                                                                                                                                                                                                                                                                                                                                                                                                                                                                                                                                                                                                                                                                                        | 05:01P<br>05:04P<br>05:05P<br>05:22P<br>05:29P<br>05:44P<br>05:58P<br>05:64P<br>05:171P<br>05:178P<br>05:216P | -       |
|                                     | <b>C* 05:06e</b> , 05:08d, 05:10d, 05:11e, 05:13e, 05:14d, 05:15e, 05:19e, 05:21e, 05:23e, 05:24e, 05:25e, 05:26e, 05:27e, 05:28e, 05:30e, 05:31e, 05:32e, 05:33e, 05:34e, 05:35e, 05:38e, 05:39e, 05:40e, 05:41e, 05:42e, 05:45e, 05:47e, 05:48Ne, 05:49e, 05:50e, 05:51Qe, 05:54e, 05:55e, 05:56e, 05:57e, 05:59e, 05:60e, 05:61e, 05:62e, 05:63e, 05:65e, 05:66e, 05:67e, 05:69e, 05:70e, 05:71e, 05:72e, 05:73e, 05:74e, 05:75e, 05:77e, 05:80e, 05:81e, 05:82e, 05:83e, 05:84e, 05:86e, 05:87e, 05:88e, 05:89e, 05:90e, 05:91Ne, 05:92Ne, 05:94e, 05:95e, 05:96e, 05:98e, 05:99Ne, 05:100e, 05:101e, 05:102e, 05:104e, 05:109e, 05:110e, 05:111e, 05:112e, 05:113Ne, 05:114e, 05:116e, 05:117e, 05:118e, 05:119e, 05:120e, 05:121e, 05:122e, 05:123e, 05:124e, 05:125e, 05:126e, 05:127e, 05:128Ne, 05:129e, 05:130e, 05:131e, 05:135e, 05:136e, 05:137e, 05:138e, 05:139e, 05:140e, 05:141e, 05:142e, 05:144e, 05:146e, 05:149e, 05:150e, 05:152e, 05:153Ne, 05:154Ne, 05:155e, 05:156e, 05:157e, 05:159e, 05:160e, 05:162e, 05:163e, 05:164e, 05:165e, 05:166e, 05:167e, 05:168e, 05:169Ne, 05:170e, 05:173e, 05:174e, 05:175Ne, 05:176e, 05:177e, 05:180Ne, 05:181e, 05:182e, 05:183e, 05:184e, 05:185e, 05:186e, 05:188e, 05:189e, 05:190e, 05:191e, 05:193e, 05:194e, 05:195e, 05:196e, 05:197e, 05:198e,                                                                    | -                                                                                                             |         |

|                                                                                             |                                                                                                                                                                                                                                                        |   |   |
|---------------------------------------------------------------------------------------------|--------------------------------------------------------------------------------------------------------------------------------------------------------------------------------------------------------------------------------------------------------|---|---|
|                                                                                             | 05:202Qe, 05:203e, 05:205e, 05:208Ne, 05:209e, 05:210e, 05:211e, 05:213Ne, 05:214e, 05:217e, 05:218e, 05:219e, 05:220e, 05:223e, 05:227e, 05:229e, 05:230e, 05:233e, 05:234e, 05:235e, 05:236e, 05:237e, 05:238e, 05:239Ne, 05:240e, 05:244Ne, 05:245e |   |   |
| <b>C*12</b>                                                                                 | C* 12:21e                                                                                                                                                                                                                                              | - | - |
| 1 rare                                                                                      |                                                                                                                                                                                                                                                        |   |   |
| <i>One side of this genotype requires a RARE allele, which makes this call less likely.</i> |                                                                                                                                                                                                                                                        |   |   |

*Notice: One or more genotypes consists of alleles from a single group.*

*For your information, the following alleles may not be detected by any assay in this test:*

*C\*02:02:13e, C\*02:02:29e / C\*04:01:23e, C\*04:07:02e, C\*04:166:02e / C\*07:30e, C\*07:95e, C\*07:140:01e, C\*07:140:02e, C\*07:165e, C\*07:241e, C\*07:265e, C\*07:304e, C\*07:307e, C\*07:342:01e, C\*07:342:02e, C\*07:347Ne, C\*07:487e, C\*07:512e, C\*07:599e, C\*07:671e, C\*07:755e, C\*07:815e, C\*07:850e / C\*14:09e, C\*14:28:01e, C\*14:28:02e, C\*14:92e / C\*16:40e, C\*16:43e, C\*16:110e, C\*16:113e / C\*18:09e*

*C\*03:437e? / C\*07:01:45e?, C\*07:01:76e?, C\*07:02:48e?, C\*07:02:88e?, C\*07:02:121e?, C\*07:37:01:02e?, C\*07:53e?, C\*07:136e?, C\*07:137:01e?, C\*07:176e?, C\*07:216e?, C\*07:264Ne?, C\*07:331e?, C\*07:358e?, C\*07:405:01e?, C\*07:405:02e?, C\*07:430e?, C\*07:468e?, C\*07:495e?, C\*07:509e?, C\*07:523e?, C\*07:525e?, C\*07:527e?, C\*07:625e?, C\*07:645e?, C\*07:652e?, C\*07:678e?, C\*07:705e?, C\*07:812e? / C\*16:22e?*

*Cannot exclude the following RARE alleles from another locus:*

*A\*02:01:37e, A\*02:05:06e, A\*02:736e, B\*44:247e, B\*44:295e, B\*44:482e*



## HLA-DR

| ALLELE GROUP                           | ALLELES                                                                                                                                                                                                                                                                                                                                                                                                                                                                                                                                                                                                                                                                                                                                                                                                                                                                                                                           | P GROUP                                                                                                                                                                                                    | ANTIGEN     |
|----------------------------------------|-----------------------------------------------------------------------------------------------------------------------------------------------------------------------------------------------------------------------------------------------------------------------------------------------------------------------------------------------------------------------------------------------------------------------------------------------------------------------------------------------------------------------------------------------------------------------------------------------------------------------------------------------------------------------------------------------------------------------------------------------------------------------------------------------------------------------------------------------------------------------------------------------------------------------------------|------------------------------------------------------------------------------------------------------------------------------------------------------------------------------------------------------------|-------------|
| <b>DRB1*07</b><br>1 common<br>145 rare | <b>DRB1* 07:01:01:01</b> , 07:01:01:02e, 07:01:01:03e, 07:01:01:04e, 07:01:01:05e, 07:01:02e, 07:01:03e, 07:01:04e, 07:01:05e, 07:01:06e, 07:01:07e, 07:01:08e, 07:01:09e, 07:01:10e, 07:01:11e, 07:01:12e, 07:01:13e, 07:01:14e, 07:01:15e, 07:01:16e, 07:01:17e, 07:01:18e, 07:01:19e, 07:01:20e, 07:01:21e, 07:01:22e, 07:01:23e, 07:01:24e, 07:01:25e                                                                                                                                                                                                                                                                                                                                                                                                                                                                                                                                                                         | 07:01P                                                                                                                                                                                                     | <b>DR7</b>  |
|                                        | DRB1* 07:03d, 07:04e, 07:09e                                                                                                                                                                                                                                                                                                                                                                                                                                                                                                                                                                                                                                                                                                                                                                                                                                                                                                      | -                                                                                                                                                                                                          |             |
|                                        | DRB1* 07:10Ne                                                                                                                                                                                                                                                                                                                                                                                                                                                                                                                                                                                                                                                                                                                                                                                                                                                                                                                     | -                                                                                                                                                                                                          | Null        |
|                                        | DRB1* 07:34:01e, 07:34:02e, 07:72e, 07:79e, 07:81e, 07:85e, 07:92e, 07:93e, 07:95e, 07:96e, 07:100e, 07:102e, 07:103e, 07:104e, 07:105e, 07:106e, 07:107e, 07:108e, 07:109e, 07:110e, 07:111e, 07:113e, 07:116e, 07:117e, 07:119e                                                                                                                                                                                                                                                                                                                                                                                                                                                                                                                                                                                                                                                                                                 | 07:01P                                                                                                                                                                                                     | -           |
|                                        | DRB1* 07:05d, 07:06e, 07:07d, 07:08e, 07:11d, 07:12e, 07:13d, 07:14e, 07:15e, 07:16e, 07:17e, 07:18e, 07:19e, 07:20e, 07:21e, 07:22e, 07:23e, 07:24e, 07:25e, 07:26Ne, 07:27e, 07:28e, 07:29e, 07:30e, 07:31e, 07:32e, 07:33e, 07:35e, 07:36e, 07:37e, 07:38e, 07:39e, 07:40e, 07:41e, 07:42e, 07:43e, 07:44e, 07:45e, 07:46e, 07:47e, 07:48e, 07:49e, 07:51e, 07:52e, 07:53e, 07:54e, 07:55e, 07:56e, 07:57e, 07:58Ne, 07:59e, 07:60e, 07:61e, 07:62e, 07:63e, 07:64e, 07:65e, 07:66e, 07:67e, 07:68Ne, 07:69e, 07:70e, 07:71e, 07:73e, 07:74e, 07:75e, 07:76e, 07:77e, 07:78e, 07:80e, 07:82e, 07:83e, 07:84e, 07:86e, 07:87Ne, 07:88e, 07:89e, 07:90e, 07:91e, 07:94e, 07:97e, 07:98e, 07:99e, 07:101Ne, 07:112e, 07:115e, 07:118Ne, 07:120e                                                                                                                                                                                   | -                                                                                                                                                                                                          |             |
| <b>DRB1*11</b><br>8 common<br>247 rare | <b>DRB1* 11:01:01:01</b> , 11:01:01:02e, 11:01:01:03e, 11:01:01:04e, <b>11:01:02:01</b> , 11:01:02:02e, 11:01:04e, 11:01:05e, 11:01:06e, 11:01:07e, 11:01:08e, 11:01:09e, 11:01:13e, 11:01:14e, 11:01:15e, 11:01:16e, 11:01:17e, 11:01:18e, 11:01:19e, 11:01:20e, 11:01:21e, 11:01:22e, 11:01:23e, 11:01:24e, 11:01:25e, 11:01:26e, 11:01:27e, 11:01:28e, 11:01:29e, 11:01:30e, 11:01:31e, 11:01:32e, 11:01:33e, 11:01:34e, 11:01:35e, 11:01:36e, 11:01:37e, 11:01:38e, 11:01:39e, 11:01:40e, 11:01:41e, 11:01:42e, <b>11:04:01:01</b> , 11:04:01:02e, <b>11:04:02</b> , 11:04:03e, 11:04:05e, 11:04:06e, 11:04:08e, 11:04:09e, 11:04:10e, 11:04:11e, 11:04:12e, 11:04:13e, 11:04:14e, 11:04:15e, 11:04:16e, 11:04:17e, 11:04:18e, 11:04:19e, 11:04:20e, 11:04:21e, 11:04:22e, <b>11:06:01</b> , 11:06:02e, 11:06:03e, <i>11:08:01d</i> , 11:08:02e, <b>11:19:01</b> , 11:19:03e, <i>11:29:01d</i> , <i>11:37:01d</i> , 11:37:02e | 11:01P<br>11:04P<br>11:06P<br>11:08P<br>11:19P<br>11:29P<br>11:37P                                                                                                                                         | <b>DR11</b> |
|                                        | <b>DRB1* 11:12:01</b> , 11:12:03e, <b>11:15:01:01</b> , 11:15:01:02e, 11:15:02e, <i>11:24:01d</i> , 11:24:02e, <i>11:28:01:01d</i> , 11:28:01:02e, 11:28:03e, <i>11:42:01d</i> , <i>11:43:01:01d</i> , 11:43:01:02e, 11:49:01e, 11:49:02e, 11:54:01e, 11:54:02e, 11:58:02e, <i>11:66:01d</i> , 11:66:02e, 11:74:01e, 11:74:02e, 11:97e, 11:101:01e, 11:101:02e, 11:102:01e, 11:102:02e, 11:117:01e, 11:117:02e, 11:129e, 11:147:01e, 11:147:02e, 11:165:01e, 11:194:01e, 11:194:02e, 11:198e, 11:224e, 11:230e, 11:234e, 11:236e, 11:238e, 11:239e, 11:240e, 11:243e, 11:244e, 11:245e, 11:252e, 11:253e, 11:255e, 11:257e, 11:258e, 11:262e, 11:265e, 11:269e, 11:271e, 11:274e, 11:277e                                                                                                                                                                                                                                         | 11:01P<br>11:04P<br>11:06P<br>11:12P<br>11:15P<br>11:24P<br>11:28P<br>11:42P<br>11:43P<br>11:49P<br>11:54P<br>11:58P<br>11:66P<br>11:74P<br>11:101P<br>11:102P<br>11:117P<br>11:147P<br>11:165P<br>11:194P | -           |
|                                        | DRB1* 11:18d, 11:32d, 11:33e, 11:35e, 11:38e, 11:39d, 11:44e, 11:47d, 11:50e, 11:51e, 11:56d, 11:57e, 11:60e, 11:61e, 11:73e, 11:75e, 11:77e, 11:78e, 11:81e, 11:88e, 11:90e, 11:91e, 11:93e, 11:94e, 11:95e, 11:99e, 11:100e, 11:104e, 11:106e,                                                                                                                                                                                                                                                                                                                                                                                                                                                                                                                                                                                                                                                                                  | -                                                                                                                                                                                                          |             |

11:108e, 11:109e, 11:110e, 11:111e, 11:112e, 11:114e, 11:116e, 11:120e, 11:121e,  
11:123e, 11:126e, 11:128e, 11:130e, 11:132e, 11:133e, 11:134e, 11:137e, 11:140e,  
11:141e, 11:143e, 11:144e, 11:145e, 11:146e, 11:150e, 11:152e, 11:154e, 11:155e,  
11:156e, 11:157e, 11:158e, 11:160e, 11:162e, 11:163e, 11:164e, 11:166e, 11:167e,  
11:169Ne, 11:170e, 11:172e, 11:174e, 11:175e, 11:177e, 11:178e, 11:179e, 11:180e,  
11:181e, 11:183e, 11:184e, 11:185e, 11:186e, 11:187e, 11:188e, 11:191e, 11:192e,  
11:196e, 11:197e, 11:199e, 11:200e, 11:201e, 11:203e, 11:204e, 11:205e, 11:206e,  
11:207e, 11:208e, 11:210e, 11:211e, 11:212e, 11:214e, 11:215e, 11:216e, 11:217Ne,  
11:219e, 11:220e, 11:221e, 11:222e, 11:223e, 11:225e, 11:226e, 11:227e, 11:228e,  
11:232e, 11:235e, 11:246Ne, 11:247e, 11:248Qe, 11:249e, 11:250Ne, 11:254e,  
11:259e, 11:263e, 11:268e, 11:273e, 11:275e, 11:278e, 11:279e

## HLA-DRB345

| GROUP                               | ALLELES                                                                                                                                                                                                                                                                                                                                                                                                                                                                                                                                                                                                                                                                                                                                                                                                                                                                                                                                                                                                                                                                                                                               | ANTIGEN     |
|-------------------------------------|---------------------------------------------------------------------------------------------------------------------------------------------------------------------------------------------------------------------------------------------------------------------------------------------------------------------------------------------------------------------------------------------------------------------------------------------------------------------------------------------------------------------------------------------------------------------------------------------------------------------------------------------------------------------------------------------------------------------------------------------------------------------------------------------------------------------------------------------------------------------------------------------------------------------------------------------------------------------------------------------------------------------------------------------------------------------------------------------------------------------------------------|-------------|
| <b>DRB3</b><br>2 common<br>170 rare | DRB3* 02:04e, 02:05:01e, 02:05:02e, 02:06d, 02:12e, 02:13e, 02:14e, 02:15e, 02:16e, 02:17d, 02:18e, 02:19e, 02:21e, 02:22:01e, 02:22:02e, 02:23e, 02:24e, 02:25e, 02:26e, 02:28e, 02:29Ne, 02:30e, 02:31:01e, 02:31:02e, 02:32e, 02:33e, 02:34e, 02:35e, 02:36e, 02:39e, 02:40e, 02:41e, 02:43e, 02:45e, 02:46e, 02:47e, 02:48e, 02:49e, 02:51e, 02:52e, 02:53e, 02:54e, 02:55Ne, 02:56e, 02:57e, 02:59e, 02:60e, 02:61Qe, 02:62e, 02:63e, 02:64e, 02:65e, 02:66e, 02:67Ne, 02:68e, 02:69e, 02:71e, 02:72e, 02:73e, 02:74e, 02:75e, 02:76e, 02:77e, 02:78e, 02:79e, 02:80Ne, 02:82e, 02:84e, 02:85e, 02:86e, 02:87e, 02:88e, 02:89e, 02:90e, 02:91e, 02:92e, 02:93e, 02:94e, 02:95Ne, 02:96e, 02:97e, 02:98e, 02:99e, 02:101e, 02:102e, 02:103e, 02:105e, 02:107e, 02:108e, 02:109Ne, 02:110e, 02:113e, 02:114e, 02:116e, 02:117e, 02:118e, 02:120e, 02:121Ne, 02:122e, 02:123e, 02:124e, 02:125Ne, 02:126e, 02:127e, 02:128e, 02:129e, 02:130e, 02:132e, 02:133e, 02:134e, 02:135e, 02:136e, 02:137Ne, 02:138e, 02:139e, 02:140e, 02:141e, 02:142e, 02:143e, 02:144e, 02:145Ne, 02:147e, 02:148e, 02:149e, 02:150e, 02:151e, 02:152e | -           |
|                                     | <b>DRB3* 02:01, 02:02:01:01</b> , 02:02:01:02e, 02:02:01:03e, 02:02:01:04e, 02:02:01:05e, 02:02:01:06e, 02:02:01:07e, 02:02:01:08e, 02:02:01:09e, 02:02:01:10e, 02:02:01:11e, 02:02:01:12e, 02:02:01:13e, 02:02:01:14e, 02:02:02d, 02:02:03e, 02:02:04e, 02:02:05e, 02:02:06e, 02:02:07e, 02:02:08e, 02:02:09e, 02:02:10e, 02:02:11e, 02:02:12e, 02:02:13e, 02:02:14e, 02:02:15e, 02:02:16e, 02:02:17e, 02:02:18e, 02:02:19e, 02:02:20e, 02:02:21e, 02:02:22e, 02:02:23e, 02:02:24e, 02:02:25e, 02:02:26e, 02:02:27e, 02:02:28e, 02:07e, 02:08e, 02:11d                                                                                                                                                                                                                                                                                                                                                                                                                                                                                                                                                                               | <b>DR52</b> |
| <b>DRB4</b><br>1 common<br>2 rare   | DRB4* 01:03:01:13Ne                                                                                                                                                                                                                                                                                                                                                                                                                                                                                                                                                                                                                                                                                                                                                                                                                                                                                                                                                                                                                                                                                                                   | DR53        |
|                                     | DRB4* 01:14Ne                                                                                                                                                                                                                                                                                                                                                                                                                                                                                                                                                                                                                                                                                                                                                                                                                                                                                                                                                                                                                                                                                                                         | -           |
|                                     | <b>DRB4* 01:03:01:02N</b>                                                                                                                                                                                                                                                                                                                                                                                                                                                                                                                                                                                                                                                                                                                                                                                                                                                                                                                                                                                                                                                                                                             | Null        |

Cannot exclude the following RARE alleles from another locus:  
 DRB1\*01:78e, DRB1\*03:87e, DRB1\*04:183e, DRB1\*04:196e, DRB1\*14:141e

HLA-DQA1

| ALLELE GROUP                   | ALLELES                                                                                                                                                                                                                                                                                                                                                                                                                                                                                                                                                                                                                                                                                                                                           | P GROUP          | ANTIGEN |
|--------------------------------|---------------------------------------------------------------------------------------------------------------------------------------------------------------------------------------------------------------------------------------------------------------------------------------------------------------------------------------------------------------------------------------------------------------------------------------------------------------------------------------------------------------------------------------------------------------------------------------------------------------------------------------------------------------------------------------------------------------------------------------------------|------------------|---------|
| DQA1*02<br>1 common<br>18 rare | DQA1* 02:01:01:01, 02:01:01:02e, 02:01:02e, 02:01:03e, 02:01:04e, 02:03e, 02:05e, 02:09e, 02:13e, 02:14e                                                                                                                                                                                                                                                                                                                                                                                                                                                                                                                                                                                                                                          | 02:01P           | -       |
|                                | DQA1* 02:02Ne, 02:04e, 02:07e, 02:08e, 02:10e, 02:11e, 02:12e, 02:15e, 02:16e                                                                                                                                                                                                                                                                                                                                                                                                                                                                                                                                                                                                                                                                     | -                |         |
| DQA1*05<br>4 common<br>66 rare | DQA1* 05:01:01:01, 05:01:01:02e, 05:01:01:03e, 05:01:01:04e, 05:01:02e, 05:01:04e, 05:01:05e, 05:01:06e, 05:03:01:01, 05:03:01:02e, 05:03:02e, 05:05:01:01, 05:05:01:02e, 05:05:01:03e, 05:05:01:04e, 05:05:01:05e, 05:05:01:06e, 05:05:01:07e, 05:05:01:08e, 05:05:01:09e, 05:05:01:10e, 05:05:01:11e, 05:05:01:12e, 05:05:01:13e, 05:05:01:14e, 05:05:01:15e, 05:05:01:16e, 05:05:01:17e, 05:05:01:18e, 05:05:01:19e, 05:05:01:20e, 05:05:01:21e, 05:05:01:22e, 05:05:01:23e, 05:05:01:24e, 05:05:01:25e, 05:05:01:26e, 05:05:02e, 05:05:03e, 05:05:04e, 05:05:05e, 05:05:06e, 05:06:01:01e, 05:06:01:02e, 05:06:01:03e, 05:07e, 05:08, 05:09d, 05:11e, 05:13e, 05:14e, 05:19e, 05:20e, 05:21e, 05:23e, 05:24e, 05:25e, 05:27e, 05:28e, 05:29Qe | 05:01P<br>05:23P | -       |
|                                | DQA1* 05:02d, 05:04e, 05:12e, 05:15Ne, 05:16e, 05:17Ne, 05:18e, 05:22e, 05:26e, 05:30e                                                                                                                                                                                                                                                                                                                                                                                                                                                                                                                                                                                                                                                            | -                |         |

## HLA-DQB1

| ALLELE GROUP                    | ALLELES                                                                                                                                                                                                                                                                                                                                                                                                                                                                                                                                                                                                                                                                                                                                                                                                                                                                                                                                                                                                                                                                                                                                                                                                                                                                                          | P GROUP                              | ANTIGEN |
|---------------------------------|--------------------------------------------------------------------------------------------------------------------------------------------------------------------------------------------------------------------------------------------------------------------------------------------------------------------------------------------------------------------------------------------------------------------------------------------------------------------------------------------------------------------------------------------------------------------------------------------------------------------------------------------------------------------------------------------------------------------------------------------------------------------------------------------------------------------------------------------------------------------------------------------------------------------------------------------------------------------------------------------------------------------------------------------------------------------------------------------------------------------------------------------------------------------------------------------------------------------------------------------------------------------------------------------------|--------------------------------------|---------|
| DQB1*03<br>3 common<br>291 rare | DQB1* 03:01:01:01, 03:01:01:02e, 03:01:01:03e, 03:01:01:04e, 03:01:01:05e, 03:01:01:06e, 03:01:01:07e, 03:01:01:08e, 03:01:01:09e, 03:01:01:10e, 03:01:01:11e, 03:01:01:12e, 03:01:01:14e, 03:01:01:15e, 03:01:01:16e, 03:01:01:17e, 03:01:01:18e, 03:01:01:19e, 03:01:01:20e, 03:01:01:21Qe, 03:01:01:22e, 03:01:01:23e, 03:01:01:24e, 03:01:01:25e, 03:01:01:26e, 03:01:02e, 03:01:03d, 03:01:04:01d, 03:01:04:02e, 03:01:05e, 03:01:06e, 03:01:07e, 03:01:08e, 03:01:09e, 03:01:10e, 03:01:11e, 03:01:12e, 03:01:13e, 03:01:14e, 03:01:15e, 03:01:16e, 03:01:17e, 03:01:18e, 03:01:19e, 03:01:20e, 03:01:21e, 03:01:22e, 03:01:23e, 03:01:24e, 03:01:25e, 03:01:26e, 03:01:27e, 03:01:28e, 03:01:29e, 03:01:30e, 03:01:31e, 03:01:32e, 03:01:33e, 03:01:34e, 03:01:35e, 03:01:36e, 03:01:37e, 03:01:38e, 03:01:39e, 03:01:40e, 03:01:41e, 03:01:42e, 03:01:43e, 03:01:44e, 03:01:45e, 03:01:46e, 03:01:47e, 03:01:48e, 03:01:49e                                                                                                                                                                                                                                                                                                                                                              | 03:01P                               | DQ7     |
|                                 | DQB1* 03:09, 03:19:01:01, 03:19:01:02Qe, 03:19:02e, 03:19:03e, 03:19:04e, 03:21e, 03:22:01:01e, 03:22:01:02e, 03:22:02e, 03:24e, 03:29e, 03:35e, 03:42e, 03:49:01:01e, 03:49:01:02e, 03:50e, 03:51e, 03:94e, 03:113e, 03:115e, 03:116e, 03:164e, 03:165e, 03:169e, 03:182e, 03:191e, 03:196e, 03:198:01e, 03:198:02e, 03:206e, 03:241e, 03:243e, 03:246e, 03:253e, 03:264e, 03:266e, 03:281e, 03:284e, 03:285e, 03:286e, 03:288e, 03:290e, 03:292e, 03:293e, 03:294e, 03:297e, 03:302e, 03:309e, 03:312e, 03:317:01e, 03:317:02e, 03:326e, 03:328e, 03:329e, 03:330e, 03:331e, 03:342e, 03:347e, 03:350e, 03:360e, 03:370e, 03:373e, 03:377e, 03:378e, 03:381e, 03:382e, 03:394e, 03:396e, 03:401e, 03:404e, 03:419e, 03:420e, 03:426e, 03:428e, 03:431e, 03:432e, 03:434e, 03:439e, 03:448e                                                                                                                                                                                                                                                                                                                                                                                                                                                                                                     | 03:01P<br>03:113P                    | -       |
|                                 | DQB1* 03:13d, 03:27e, 03:28e, 03:36e, 03:44e, 03:46e, 03:47e, 03:48e, 03:52e, 03:53e, 03:54e, 03:55e, 03:56e, 03:57e, 03:58e, 03:59e, 03:60e, 03:69e, 03:71e, 03:73e, 03:74e, 03:75e, 03:76e, 03:77e, 03:78e, 03:82e, 03:83e, 03:84Ne, 03:92e, 03:93e, 03:101e, 03:102e, 03:103e, 03:108e, 03:109e, 03:114e, 03:118Ne, 03:119e, 03:120e, 03:121e, 03:122e, 03:127e, 03:128e, 03:129e, 03:130e, 03:131e, 03:133e, 03:134e, 03:135e, 03:139e, 03:140e, 03:142e, 03:143e, 03:144e, 03:147e, 03:148e, 03:150e, 03:151e, 03:152e, 03:154e, 03:157e, 03:158e, 03:159e, 03:160e, 03:162e, 03:163e, 03:166e, 03:167e, 03:170e, 03:171e, 03:173e, 03:186e, 03:187e, 03:188e, 03:192e, 03:193e, 03:194e, 03:197Qe, 03:201e, 03:202e, 03:207e, 03:208e, 03:216e, 03:218e, 03:219e, 03:231e, 03:232e, 03:235e, 03:236e, 03:242e, 03:252e, 03:254e, 03:255e, 03:256e, 03:257e, 03:260e, 03:267e, 03:268e, 03:271e, 03:275e, 03:276Ne, 03:291e, 03:303Ne, 03:305e, 03:306e, 03:307e, 03:311e, 03:314e, 03:335e, 03:338Ne, 03:340Ne, 03:341e, 03:353e, 03:358Ne, 03:361e, 03:366e, 03:372e, 03:376Ne, 03:380e, 03:385Ne, 03:387e, 03:389e, 03:390e, 03:391e, 03:399Ne, 03:400Ne, 03:407Ne, 03:408e, 03:417e, 03:418e, 03:421e, 03:423e, 03:424e, 03:425e, 03:427Ne, 03:430e, 03:435e, 03:436e, 03:438e, 03:449e | -                                    | -       |
| DQB1*03<br>1 common<br>136 rare | DQB1* 03:02:18e, 03:02:32e, 03:10:01e                                                                                                                                                                                                                                                                                                                                                                                                                                                                                                                                                                                                                                                                                                                                                                                                                                                                                                                                                                                                                                                                                                                                                                                                                                                            | 03:02P<br>03:10P                     | DQ8     |
|                                 | DQB1* 03:03:02:01, 03:03:02:02e, 03:03:02:03e, 03:03:02:04e, 03:03:02:05e, 03:03:03:01e, 03:03:03:02e, 03:03:04e, 03:03:05e, 03:03:06e, 03:03:07e, 03:03:08e, 03:03:09e, 03:03:10e, 03:03:11e, 03:03:12e, 03:03:13e, 03:03:14e, 03:03:15e, 03:03:16e, 03:03:17e, 03:03:18e, 03:03:19e, 03:03:20e, 03:03:21e, 03:03:22e, 03:03:23e, 03:03:24e, 03:03:25e, 03:03:26e, 03:03:27e                                                                                                                                                                                                                                                                                                                                                                                                                                                                                                                                                                                                                                                                                                                                                                                                                                                                                                                    | 03:03P                               | DQ9     |
|                                 | DQB1* 03:23:03e, 03:31e, 03:33e, 03:38:01e, 03:39e, 03:43e, 03:79e, 03:87e, 03:88e, 03:89e, 03:91Qe, 03:96e, 03:97e, 03:98e, 03:117e, 03:195e, 03:222e, 03:248e, 03:249e, 03:316e, 03:319e, 03:365e, 03:384e, 03:393e, 03:395e, 03:397e, 03:398e, 03:402e, 03:405e, 03:406e, 03:414e, 03:445e                                                                                                                                                                                                                                                                                                                                                                                                                                                                                                                                                                                                                                                                                                                                                                                                                                                                                                                                                                                                    | 03:03P<br>03:10P<br>03:23P<br>03:38P | -       |
|                                 | DQB1* 03:08e, 03:12e, 03:15e, 03:20e, 03:26e, 03:30e, 03:34e, 03:40e, 03:41e, 03:65e, 03:86e, 03:90Ne, 03:95Ne, 03:99Qe, 03:104e, 03:105e, 03:107e, 03:110e, 03:111e, 03:112e, 03:123e, 03:124e, 03:125e, 03:126e, 03:136e, 03:137e, 03:141e, 03:145e, 03:149e, 03:153e, 03:155e, 03:156e, 03:161e, 03:168e, 03:176e, 03:177e, 03:180e, 03:200e, 03:205e, 03:209e, 03:212e, 03:214e, 03:217e, 03:221e, 03:227e,                                                                                                                                                                                                                                                                                                                                                                                                                                                                                                                                                                                                                                                                                                                                                                                                                                                                                  | -                                    | -       |

03:228e, 03:230e, 03:234e, 03:238e, 03:239e, 03:258e, 03:261e, 03:270e, 03:272e,  
03:280e, 03:282Ne, 03:283e, 03:304e, 03:313e, 03:332e, 03:333e, 03:336e,  
03:337e, 03:351e, 03:356Ne, 03:359e, 03:363e, 03:374e, 03:375Ne, 03:411Ne,  
03:450e

*This genotype consists of alleles from a single group.*

*For your information, the following alleles may not be detected by any assay in this test:*

*DQB1\*05:51e, DQB1\*05:82e, DQB1\*05:119e, DQB1\*05:122e, DQB1\*05:125e, DQB1\*05:207e, DQB1\*05:273Ne  
DQB1\*02:01:06e?, DQB1\*02:01:17e?, DQB1\*02:01:20e?, DQB1\*02:01:22e?, DQB1\*02:01:23e?, DQB1\*02:01:29e?,  
DQB1\*02:02:10e?, DQB1\*02:11e?, DQB1\*02:13e?, DQB1\*02:14:01:01e?, DQB1\*02:14:01:02e?, DQB1\*02:14:02e?, DQB1\*02:24e?,  
DQB1\*02:25e?, DQB1\*02:28e?, DQB1\*02:30e?, DQB1\*02:33e?, DQB1\*02:36e?, DQB1\*02:41e?, DQB1\*02:49e?, DQB1\*02:58Ne?,  
DQB1\*02:60e?, DQB1\*02:67Ne?, DQB1\*02:68e?, DQB1\*02:69e?, DQB1\*02:70e?, DQB1\*02:72e?, DQB1\*02:88e?, DQB1\*02:101e?,  
DQB1\*02:123e?, DQB1\*02:140e?, DQB1\*02:153e?, DQB1\*02:161e?, DQB1\*02:164e? / DQB1\*04:02:02e?, DQB1\*04:02:19e?,  
DQB1\*04:18e?, DQB1\*04:19e?, DQB1\*04:22e?, DQB1\*04:24e?, DQB1\*04:31e?, DQB1\*04:33e?, DQB1\*04:38e?, DQB1\*04:49e?,  
DQB1\*04:61e?, DQB1\*04:67e? / DQB1\*05:01:18e?, DQB1\*05:02:05e?, DQB1\*05:02:17e?, DQB1\*05:03:02e?, DQB1\*05:03:15e?,  
DQB1\*05:03:24e?, DQB1\*05:13e?, DQB1\*05:25e?, DQB1\*05:30e?, DQB1\*05:38e?, DQB1\*05:39e?, DQB1\*05:62e?, DQB1\*05:75e?,  
DQB1\*05:79e?, DQB1\*05:93e?, DQB1\*05:94e?, DQB1\*05:110Ne?, DQB1\*05:111e?, DQB1\*05:112e?, DQB1\*05:117e?,  
DQB1\*05:118e?, DQB1\*05:120e?, DQB1\*05:121e?, DQB1\*05:156e?, DQB1\*05:157e?, DQB1\*05:169e?, DQB1\*05:179e?,  
DQB1\*05:205e?, DQB1\*05:208Ne?, DQB1\*05:233e?, DQB1\*05:235Ne?, DQB1\*05:236Ne?, DQB1\*05:244e?, DQB1\*05:258e?,  
DQB1\*05:261e? / DQB1\*06:01:14e?, DQB1\*06:01:20e?, DQB1\*06:05:02e?, DQB1\*06:43e?*

## HLA-DPA1

| ALLELE GROUP                                                  | ALLELES                                                                                                                                                                                                                                                                                                                                                                                                                                                                                                                                                                                                                                                                                                                                                                                                                                                                                                                                                                                                                                                                         | P GROUP                    | ANTIGEN |
|---------------------------------------------------------------|---------------------------------------------------------------------------------------------------------------------------------------------------------------------------------------------------------------------------------------------------------------------------------------------------------------------------------------------------------------------------------------------------------------------------------------------------------------------------------------------------------------------------------------------------------------------------------------------------------------------------------------------------------------------------------------------------------------------------------------------------------------------------------------------------------------------------------------------------------------------------------------------------------------------------------------------------------------------------------------------------------------------------------------------------------------------------------|----------------------------|---------|
| <b>DPA1*01</b><br>2 common<br>109 rare                        | <b>DPA1* 01:03:01:01</b> , 01:03:01:02e, 01:03:01:03e, 01:03:01:04e, 01:03:01:05e, 01:03:01:06e, 01:03:01:07e, 01:03:01:08e, 01:03:01:09e, 01:03:01:10e, 01:03:01:11e, 01:03:01:12e, 01:03:01:13e, 01:03:01:14e, 01:03:01:15e, 01:03:01:16e, 01:03:01:17e, 01:03:01:18Qe, 01:03:01:19e, 01:03:01:20e, 01:03:01:21e, 01:03:01:22e, 01:03:01:23e, 01:03:01:24e, 01:03:01:25e, 01:03:01:26e, 01:03:01:27e, 01:03:01:28e, 01:03:01:29e, 01:03:01:30e, 01:03:01:31e, 01:03:01:32e, 01:03:01:33e, 01:03:01:34e, 01:03:01:35e, 01:03:01:36e, 01:03:01:37e, 01:03:01:38e, 01:03:01:39e, 01:03:02e, 01:03:03e, 01:03:04e, 01:03:05e, 01:03:06e, 01:03:07e, 01:03:08e, 01:03:09e, 01:03:10e, 01:03:11e, 01:03:12e, 01:03:13e, 01:03:14e, 01:03:15e, 01:03:16e, 01:03:17e, 01:03:18e, 01:03:19e, 01:03:20e, 01:03:21e, 01:03:22e, 01:03:23e, 01:03:24e, 01:03:25e, 01:03:26e, 01:03:27e, <b>01:04:01</b> , 01:04:02e, 01:06:01e, 01:06:02e, 01:14e, 01:17e, 01:18e, 01:19e, 01:25e, 01:28e, 01:30e, 01:33e, 01:34e, 01:36e, 01:37e, 01:38e, 01:43e, 01:44e, 01:45e, 01:46e, 01:48e, 01:49e | 01:03P<br>01:04P<br>01:06P | -       |
|                                                               | DPA1* 01:05e, 01:07e, 01:09e, 01:10e, 01:12e, 01:15e, 01:16e, 01:20e, 01:21Qe, 01:22e, 01:23e, 01:24e, 01:26e, 01:27e, 01:29Ne, 01:31e, 01:32Ne, 01:35Ne, 01:39e, 01:40e, 01:41e, 01:42e, 01:47e, 01:50e                                                                                                                                                                                                                                                                                                                                                                                                                                                                                                                                                                                                                                                                                                                                                                                                                                                                        | -                          | -       |
| <b>DPA1*01</b><br>2 common<br>109 rare                        | <b>DPA1* 01:03:01:01</b> , 01:03:01:02e, 01:03:01:03e, 01:03:01:04e, 01:03:01:05e, 01:03:01:06e, 01:03:01:07e, 01:03:01:08e, 01:03:01:09e, 01:03:01:10e, 01:03:01:11e, 01:03:01:12e, 01:03:01:13e, 01:03:01:14e, 01:03:01:15e, 01:03:01:16e, 01:03:01:17e, 01:03:01:18Qe, 01:03:01:19e, 01:03:01:20e, 01:03:01:21e, 01:03:01:22e, 01:03:01:23e, 01:03:01:24e, 01:03:01:25e, 01:03:01:26e, 01:03:01:27e, 01:03:01:28e, 01:03:01:29e, 01:03:01:30e, 01:03:01:31e, 01:03:01:32e, 01:03:01:33e, 01:03:01:34e, 01:03:01:35e, 01:03:01:36e, 01:03:01:37e, 01:03:01:38e, 01:03:01:39e, 01:03:02e, 01:03:03e, 01:03:04e, 01:03:05e, 01:03:06e, 01:03:07e, 01:03:08e, 01:03:09e, 01:03:10e, 01:03:11e, 01:03:12e, 01:03:13e, 01:03:14e, 01:03:15e, 01:03:16e, 01:03:17e, 01:03:18e, 01:03:19e, 01:03:20e, 01:03:21e, 01:03:22e, 01:03:23e, 01:03:24e, 01:03:25e, 01:03:26e, 01:03:27e, <b>01:04:01</b> , 01:04:02e, 01:06:01e, 01:06:02e, 01:14e, 01:17e, 01:18e, 01:19e, 01:25e, 01:28e, 01:30e, 01:33e, 01:34e, 01:36e, 01:37e, 01:38e, 01:43e, 01:44e, 01:45e, 01:46e, 01:48e, 01:49e | 01:03P<br>01:04P<br>01:06P | -       |
|                                                               | DPA1* 01:05e, 01:07e, 01:09e, 01:10e, 01:12e, 01:15e, 01:16e, 01:20e, 01:21Qe, 01:22e, 01:23e, 01:24e, 01:26e, 01:27e, 01:29Ne, 01:31e, 01:32Ne, 01:35Ne, 01:39e, 01:40e, 01:41e, 01:42e, 01:47e, 01:50e                                                                                                                                                                                                                                                                                                                                                                                                                                                                                                                                                                                                                                                                                                                                                                                                                                                                        | -                          | -       |
| <i>This genotype consists of alleles from a single group.</i> |                                                                                                                                                                                                                                                                                                                                                                                                                                                                                                                                                                                                                                                                                                                                                                                                                                                                                                                                                                                                                                                                                 |                            |         |

*For your information, the following alleles may not be detected by any assay in this test:  
 DPA1\*01:01:01:01e, DPA1\*01:01:01:02e, DPA1\*01:01:01:03e, DPA1\*01:01:02e / DPA1\*02:01e  
 DPA1\*01:03:14e?, DPA1\*01:03:17e?, DPA1\*01:13e?, DPA1\*01:20e?, DPA1\*01:23e?, DPA1\*01:26e?, DPA1\*01:39e?*

HLA-DPB1

More than one genotype can explain the reaction pattern.

Possibilities to consider:

| EPITYPE                                          | ALLELES                                                                                                                                                                                                                                                                                                                                                                                                                                                                                                                                                                                                                                                                                                                                                                                                                                                                                                                                                                                                                                                                                                                                                                                                                                                                                                                                                                                                                                                                                                                                                                                                                                                                                                                                                                                                                                                                                                                                                                                                                                                                                                                                                                                                                                                                                                                                         | P GROUP                                           | HVR-A | HVR-B | HVR-C | HVR-D | HVR-E | HVR-F |
|--------------------------------------------------|-------------------------------------------------------------------------------------------------------------------------------------------------------------------------------------------------------------------------------------------------------------------------------------------------------------------------------------------------------------------------------------------------------------------------------------------------------------------------------------------------------------------------------------------------------------------------------------------------------------------------------------------------------------------------------------------------------------------------------------------------------------------------------------------------------------------------------------------------------------------------------------------------------------------------------------------------------------------------------------------------------------------------------------------------------------------------------------------------------------------------------------------------------------------------------------------------------------------------------------------------------------------------------------------------------------------------------------------------------------------------------------------------------------------------------------------------------------------------------------------------------------------------------------------------------------------------------------------------------------------------------------------------------------------------------------------------------------------------------------------------------------------------------------------------------------------------------------------------------------------------------------------------------------------------------------------------------------------------------------------------------------------------------------------------------------------------------------------------------------------------------------------------------------------------------------------------------------------------------------------------------------------------------------------------------------------------------------------------|---------------------------------------------------|-------|-------|-------|-------|-------|-------|
| <p><b>EDP04</b></p> <p>1 common<br/>291 rare</p> | <p><b>DPB1* 04:01:01:01</b>, 04:01:01:02e, 04:01:01:03e, 04:01:01:04e, 04:01:01:05e, 04:01:01:06e, 04:01:01:07e, 04:01:01:08e, 04:01:01:09e, 04:01:01:10e, 04:01:01:11e, 04:01:01:12e, 04:01:01:13e, 04:01:01:14e, 04:01:01:15e, 04:01:01:16e, 04:01:01:17e, 04:01:01:18e, 04:01:01:19e, 04:01:01:20e, 04:01:01:21e, 04:01:01:22e, 04:01:01:23e, 04:01:01:25e, 04:01:01:26e, 04:01:01:27e, 04:01:01:28e, 04:01:01:29e, 04:01:01:30e, 04:01:01:31e, 04:01:01:32e, 04:01:01:33e, 04:01:01:34e, 04:01:01:35e, 04:01:01:36e, 04:01:01:37e, 04:01:01:38e, 04:01:01:39e, 04:01:01:40e, 04:01:01:41e, 04:01:01:42e, 04:01:01:43e, 04:01:01:44e, 04:01:01:45e, 04:01:01:46e, 04:01:01:47e, 04:01:01:48e, 04:01:01:49e, 04:01:01:50e, 04:01:01:51e, 04:01:01:52e, 04:01:01:53e, 04:01:02e, 04:01:03e, 04:01:04:01e, 04:01:04:02e, 04:01:05e, 04:01:06e, 04:01:07e, 04:01:08e, 04:01:09e, 04:01:10e, 04:01:11e, 04:01:12e, 04:01:13e, 04:01:14e, 04:01:15e, 04:01:16e, 04:01:17e, 04:01:18e, 04:01:19e, 04:01:20e, 04:01:21e, 04:01:22e, 04:01:23e, 04:01:24e, 04:01:25e, 04:01:26e, 04:01:27e, 04:01:28e, 04:01:29e, 04:01:30e, 04:01:31e, 04:01:32e, 04:01:33e, 04:01:34e, 04:01:35e, 04:01:36e, 04:01:37:01e, 04:01:37:02e, 04:01:38e, 04:01:39:01e, 04:01:39:02e, 04:01:40e, 04:01:41e, 04:01:42e, 04:01:43e, 04:01:44e, 04:01:45e, 04:01:46e, 04:01:47e, 04:01:48e, 04:01:49e, 04:01:50e / DPB1* 213:01:01e, 213:01:02e / DPB1* 334:01:01e, 334:01:02e / DPB1* 350:01e / DPB1* 415:01e / DPB1* 459:01e / DPB1* 464:01e / DPB1* 523:01:01e, 523:01:02e / DPB1* 534:01e / DPB1* 615:01e / DPB1* 618:01e / DPB1* 670:01e / DPB1* 677:01e / DPB1* 699:01e / DPB1* 755:01e / DPB1* 757:01e / DPB1* 765:01e / DPB1* 767:01e / DPB1* 784:01e / DPB1* 804:01e / DPB1* 806:01:01:01e, 806:01:01:02e / DPB1* 813:01e / DPB1* 820:01e / DPB1* 824:01:01e, 824:01:02e / DPB1* 826:01e / DPB1* 850:01e / DPB1* 859:01e / DPB1* 880:01e / DPB1* 882:01e / DPB1* 926:01e / DPB1* 932:01e / DPB1* 939:01e / DPB1* 978:01e / DPB1* 988:01e / DPB1* 989:01e / DPB1* 992:01e / DPB1* 997:01e / DPB1* 1001:01e / DPB1* 1002:01e / DPB1* 1003:01e / DPB1* 1004:01e / DPB1* 1010:01e / DPB1* 1011:01e / DPB1* 1023:01e / DPB1* 1033:01e / DPB1* 1074:01e / DPB1* 1086:01e / DPB1* 1091:01e / DPB1* 1100:01e / DPB1* 1129:01e / DPB1* 1132:01e / DPB1* 1146:01e / DPB1*</p> | <p>04:01P<br/>213:01P<br/>334:01P<br/>523:01P</p> | LFQG  | EEFA  | AAE   | ILEEK | M     | GGPM  |



1148:01Qe / DPB1\* 1152:01e / DPB1\*  
 1155:01e / DPB1\* 1161:01e / DPB1\*  
 1164:01e

DPB1\* 04:01:01:24Ne / DPB1\* 99:01e /  
 DPB1\* 120:01Ne / DPB1\* 121:01e / DPB1\*  
 128:01e / DPB1\* 134:01e / DPB1\* 149:01e /  
 DPB1\* 169:01e / DPB1\* 174:01e / DPB1\*  
 175:01e / DPB1\* 180:01e / DPB1\* 181:01e /  
 DPB1\* 192:01e / DPB1\* 193:01e / DPB1\*  
 194:01e / DPB1\* 195:01e / DPB1\* 212:01e /  
 DPB1\* 224:01e / DPB1\* 225:01e / DPB1\*  
 228:01e / DPB1\* 231:01e / DPB1\* 232:01e /  
 DPB1\* 240:01e / DPB1\* 253:01e / DPB1\*  
 255:01e / DPB1\* 262:01e / DPB1\* 272:01e /  
 DPB1\* 275:01e / DPB1\* 276:01e / DPB1\*  
 281:01e / DPB1\* 282:01e / DPB1\* 283:01e /  
 DPB1\* 298:01e / DPB1\* 320:01e / DPB1\*  
 323:01e / DPB1\* 335:01e / DPB1\* 336:01e /  
 DPB1\* 341:01e / DPB1\* 356:01e / DPB1\*  
 360:01e / DPB1\* 372:01e / DPB1\* 376:01e /  
 DPB1\* 378:01e / DPB1\* 396:01e / DPB1\*  
 397:01e / DPB1\* 418:01e / DPB1\* 425:01e /  
 DPB1\* 426:01e / DPB1\* 428:01e / DPB1\*  
 434:01e / DPB1\* 453:01e / DPB1\* 455:01Ne /  
 DPB1\* 465:01e / DPB1\* 468:01e / DPB1\*  
 475:01e / DPB1\* 476:01e / DPB1\* 479:01e /  
 DPB1\* 485:01e / DPB1\* 486:01e / DPB1\*  
 487:01e / DPB1\* 497:01e / DPB1\* 500:01e /  
 DPB1\* 520:01e / DPB1\* 521:01e / DPB1\*  
 522:01e / DPB1\* 524:01e / DPB1\* 529:01e /  
 DPB1\* 553:01e / DPB1\* 554:01e / DPB1\*  
 556:01e / DPB1\* 559:01e / DPB1\* 569:01e /  
 DPB1\* 575:01e / DPB1\* 578:01e / DPB1\*  
 583:01e / DPB1\* 591:01e / DPB1\* 593:01e /  
 DPB1\* 607:01e / DPB1\* 614:01e / DPB1\*  
 625:01e / DPB1\* 643:01e / DPB1\* 658:01e /  
 DPB1\* 666:01e / DPB1\* 682:01e / DPB1\*  
 683:01e / DPB1\* 694:01e / DPB1\* 722:01e /  
 DPB1\* 739:01e / DPB1\* 742:01e / DPB1\*  
 750:01e / DPB1\* 754:01Ne / DPB1\*  
 756:01Ne / DPB1\* 758:01e / DPB1\* 761:01e /  
 DPB1\* 769:01e / DPB1\* 772:01e / DPB1\*  
 773:01e / DPB1\* 788:01e / DPB1\* 795:01e /  
 DPB1\* 803:01e / DPB1\* 808:01e / DPB1\*  
 811:01e / DPB1\* 812:01e / DPB1\* 814:01e /  
 DPB1\* 837:01e / DPB1\* 842:01e / DPB1\*  
 852:01e / DPB1\* 878:01Ne / DPB1\* 895:01e /  
 DPB1\* 915:01e / DPB1\* 957:01e / DPB1\*  
 966:01e / DPB1\* 974:01Ne / DPB1\* 993:01e /  
 DPB1\* 1040:01e / DPB1\* 1042:01e / DPB1\*  
 1048:01e / DPB1\* 1060:01e / DPB1\*  
 1062:01e / DPB1\* 1064:01e / DPB1\*  
 1066:01e / DPB1\* 1108:01e / DPB1\*  
 1112:01Ne / DPB1\* 1113:01e / DPB1\*  
 1121:01Ne / DPB1\* 1139:01e / DPB1\*  
 1167:01e

-

**EDP04**

1 common  
 289 rare

**DPB1\* 04:01:01:01**, 04:01:01:02e,  
 04:01:01:03e, 04:01:01:04e, 04:01:01:05e,  
 04:01:01:06e, 04:01:01:07e, 04:01:01:08e,  
 04:01:01:09e, 04:01:01:10e, 04:01:01:11e,  
 04:01:01:12e, 04:01:01:13e, 04:01:01:14e,  
 04:01:01:15e, 04:01:01:16e, 04:01:01:17e,  
 04:01:01:18e, 04:01:01:19e, 04:01:01:20e,  
 04:01:01:21e, 04:01:01:22e, 04:01:01:23e,

04:01P  
 213:01P  
 334:01P  
 523:01P

LFQG

EEFA

AAE

ILEEK

M

GGPM

04:01:01:25e, 04:01:01:26e, 04:01:01:27e,  
04:01:01:28e, 04:01:01:29e, 04:01:01:30e,  
04:01:01:31e, 04:01:01:32e, 04:01:01:33e,  
04:01:01:34e, 04:01:01:35e, 04:01:01:36e,  
04:01:01:37e, 04:01:01:38e, 04:01:01:39e,  
04:01:01:40e, 04:01:01:41e, 04:01:01:42e,  
04:01:01:43e, 04:01:01:44e, 04:01:01:45e,  
04:01:01:46e, 04:01:01:47e, 04:01:01:48e,  
04:01:01:49e, 04:01:01:50e, 04:01:01:51e,  
04:01:01:52e, 04:01:01:53e, 04:01:02e,  
04:01:03e, 04:01:04:01e, 04:01:04:02e,  
04:01:05e, 04:01:06e, 04:01:07e, 04:01:08e,  
04:01:09e, 04:01:10e, 04:01:11e, 04:01:12e,  
04:01:14e, 04:01:15e, 04:01:16e, 04:01:17e,  
04:01:18e, 04:01:19e, 04:01:20e, 04:01:21e,  
04:01:22e, 04:01:23e, 04:01:24e, 04:01:25e,  
04:01:26e, 04:01:27e, 04:01:28e, 04:01:29e,  
04:01:30e, 04:01:31e, 04:01:32e, 04:01:33e,  
04:01:34e, 04:01:35e, 04:01:36e,  
04:01:37:01e, 04:01:37:02e, 04:01:38e,  
04:01:39:01e, 04:01:39:02e, 04:01:40e,  
04:01:41e, 04:01:42e, 04:01:43e, 04:01:44e,  
04:01:45e, 04:01:46e, 04:01:47e, 04:01:48e,  
04:01:49e, 04:01:50e / DPB1\* 213:01:01e,  
213:01:02e / DPB1\* 334:01:01e, 334:01:02e /  
DPB1\* 350:01e / DPB1\* 415:01e / DPB1\*  
459:01e / DPB1\* 464:01e / DPB1\*  
523:01:01e, 523:01:02e / DPB1\* 534:01e /  
DPB1\* 615:01e / DPB1\* 618:01e / DPB1\*  
670:01e / DPB1\* 677:01e / DPB1\* 699:01e /  
DPB1\* 755:01e / DPB1\* 757:01e / DPB1\*  
765:01e / DPB1\* 767:01e / DPB1\* 784:01e /  
DPB1\* 804:01e / DPB1\* 806:01:01:01e,  
806:01:01:02e / DPB1\* 813:01e / DPB1\*  
820:01e / DPB1\* 824:01:01e, 824:01:02e /  
DPB1\* 826:01e / DPB1\* 850:01e / DPB1\*  
859:01e / DPB1\* 880:01e / DPB1\* 882:01e /  
DPB1\* 926:01e / DPB1\* 932:01e / DPB1\*  
939:01e / DPB1\* 978:01e / DPB1\* 988:01e /  
DPB1\* 989:01e / DPB1\* 992:01e / DPB1\*  
997:01e / DPB1\* 1001:01e / DPB1\*  
1002:01e / DPB1\* 1003:01e / DPB1\*  
1004:01e / DPB1\* 1010:01e / DPB1\*  
1011:01e / DPB1\* 1023:01e / DPB1\*  
1033:01e / DPB1\* 1074:01e / DPB1\*  
1086:01e / DPB1\* 1091:01e / DPB1\*  
1100:01e / DPB1\* 1129:01e / DPB1\*  
1132:01e / DPB1\* 1146:01e / DPB1\*  
1148:01Qe / DPB1\* 1152:01e / DPB1\*  
1155:01e / DPB1\* 1161:01e / DPB1\*  
1164:01e

DPB1\* 04:01:01:24Ne / DPB1\* 99:01e /  
DPB1\* 120:01Ne / DPB1\* 121:01e / DPB1\*  
128:01e / DPB1\* 134:01e / DPB1\* 149:01e /  
DPB1\* 169:01e / DPB1\* 174:01e / DPB1\*  
175:01e / DPB1\* 180:01e / DPB1\* 181:01e /  
DPB1\* 192:01e / DPB1\* 194:01e / DPB1\*  
195:01e / DPB1\* 212:01e / DPB1\* 224:01e /  
DPB1\* 225:01e / DPB1\* 228:01e / DPB1\*  
231:01e / DPB1\* 232:01e / DPB1\* 240:01e /  
DPB1\* 253:01e / DPB1\* 255:01e / DPB1\*  
262:01e / DPB1\* 272:01e / DPB1\* 275:01e /  
DPB1\* 276:01e / DPB1\* 281:01e / DPB1\*  
282:01e / DPB1\* 283:01e / DPB1\* 298:01e /  
DPB1\* 320:01e / DPB1\* 323:01e / DPB1\*

-

335:01e / DPB1\* 336:01e / DPB1\* 341:01e /  
 DPB1\* 356:01e / DPB1\* 360:01e / DPB1\*  
 372:01e / DPB1\* 376:01e / DPB1\* 378:01e /  
 DPB1\* 396:01e / DPB1\* 397:01e / DPB1\*  
 418:01e / DPB1\* 425:01e / DPB1\* 426:01e /  
 DPB1\* 428:01e / DPB1\* 434:01e / DPB1\*  
 453:01e / DPB1\* 455:01Ne / DPB1\* 465:01e /  
 DPB1\* 468:01e / DPB1\* 475:01e / DPB1\*  
 476:01e / DPB1\* 479:01e / DPB1\* 485:01e /  
 DPB1\* 486:01e / DPB1\* 487:01e / DPB1\*  
 497:01e / DPB1\* 500:01e / DPB1\* 520:01e /  
 DPB1\* 521:01e / DPB1\* 522:01e / DPB1\*  
 524:01e / DPB1\* 529:01e / DPB1\* 553:01e /  
 DPB1\* 554:01e / DPB1\* 556:01e / DPB1\*  
 559:01e / DPB1\* 569:01e / DPB1\* 575:01e /  
 DPB1\* 578:01e / DPB1\* 583:01e / DPB1\*  
 591:01e / DPB1\* 593:01e / DPB1\* 607:01e /  
 DPB1\* 614:01e / DPB1\* 625:01e / DPB1\*  
 643:01e / DPB1\* 658:01e / DPB1\* 666:01e /  
 DPB1\* 682:01e / DPB1\* 683:01e / DPB1\*  
 694:01e / DPB1\* 722:01e / DPB1\* 739:01e /  
 DPB1\* 742:01e / DPB1\* 750:01e / DPB1\*  
 754:01Ne / DPB1\* 756:01Ne / DPB1\*  
 758:01e / DPB1\* 761:01e / DPB1\* 769:01e /  
 DPB1\* 772:01e / DPB1\* 773:01e / DPB1\*  
 788:01e / DPB1\* 795:01e / DPB1\* 803:01e /  
 DPB1\* 808:01e / DPB1\* 811:01e / DPB1\*  
 812:01e / DPB1\* 814:01e / DPB1\* 837:01e /  
 DPB1\* 842:01e / DPB1\* 852:01e / DPB1\*  
 878:01Ne / DPB1\* 895:01e / DPB1\* 915:01e /  
 DPB1\* 957:01e / DPB1\* 966:01e / DPB1\*  
 974:01Ne / DPB1\* 993:01e / DPB1\*  
 1040:01e / DPB1\* 1042:01e / DPB1\*  
 1048:01e / DPB1\* 1060:01e / DPB1\*  
 1062:01e / DPB1\* 1064:01e / DPB1\*  
 1066:01e / DPB1\* 1108:01e / DPB1\*  
 1112:01Ne / DPB1\* 1113:01e / DPB1\*  
 1121:01Ne / DPB1\* 1139:01e / DPB1\*  
 1167:01e

*This genotype consists of alleles from a single group.  
 This epitope was MANUALLY chosen.*

OR

| EPITYPE                           | ALLELES                                                                                                                                                                                                                                                                                                                                                                                                                                                                                                                                                                                                                                                                                                                                                                          | P GROUP                                 | HVR-A | HVR-B | HVR-C | HVR-D | HVR-E | HVR-F |
|-----------------------------------|----------------------------------------------------------------------------------------------------------------------------------------------------------------------------------------------------------------------------------------------------------------------------------------------------------------------------------------------------------------------------------------------------------------------------------------------------------------------------------------------------------------------------------------------------------------------------------------------------------------------------------------------------------------------------------------------------------------------------------------------------------------------------------|-----------------------------------------|-------|-------|-------|-------|-------|-------|
| EDP04<br><br>1 common<br>291 rare | DPB1* 04:01:01:01, 04:01:01:02e,<br>04:01:01:03e, 04:01:01:04e, 04:01:01:05e,<br>04:01:01:06e, 04:01:01:07e, 04:01:01:08e,<br>04:01:01:09e, 04:01:01:10e, 04:01:01:11e,<br>04:01:01:12e, 04:01:01:13e, 04:01:01:14e,<br>04:01:01:15e, 04:01:01:16e, 04:01:01:17e,<br>04:01:01:18e, 04:01:01:19e, 04:01:01:20e,<br>04:01:01:21e, 04:01:01:22e, 04:01:01:23e,<br>04:01:01:25e, 04:01:01:26e, 04:01:01:27e,<br>04:01:01:28e, 04:01:01:29e, 04:01:01:30e,<br>04:01:01:31e, 04:01:01:32e, 04:01:01:33e,<br>04:01:01:34e, 04:01:01:35e, 04:01:01:36e,<br>04:01:01:37e, 04:01:01:38e, 04:01:01:39e,<br>04:01:01:40e, 04:01:01:41e, 04:01:01:42e,<br>04:01:01:43e, 04:01:01:44e, 04:01:01:45e,<br>04:01:01:46e, 04:01:01:47e, 04:01:01:48e,<br>04:01:01:49e, 04:01:01:50e, 04:01:01:51e, | 04:01P<br>213:01P<br>334:01P<br>523:01P | LFQG  | EEFA  | AAE   | ILEEK | M     | GGPM  |

04:01:01:52e, 04:01:01:53e, 04:01:02e,  
04:01:03e, 04:01:04:01e, 04:01:04:02e,  
04:01:05e, 04:01:06e, 04:01:07e, 04:01:08e,  
04:01:09e, 04:01:10e, 04:01:11e, 04:01:12e,  
04:01:13e, 04:01:14e, 04:01:15e, 04:01:16e,  
04:01:17e, 04:01:18e, 04:01:19e, 04:01:20e,  
04:01:21e, 04:01:22e, 04:01:23e, 04:01:24e,  
04:01:25e, 04:01:26e, 04:01:27e, 04:01:28e,  
04:01:29e, 04:01:30e, 04:01:31e, 04:01:32e,  
04:01:33e, 04:01:34e, 04:01:35e, 04:01:36e,  
04:01:37:01e, 04:01:37:02e, 04:01:38e,  
04:01:39:01e, 04:01:39:02e, 04:01:40e,  
04:01:41e, 04:01:42e, 04:01:43e, 04:01:44e,  
04:01:45e, 04:01:46e, 04:01:47e, 04:01:48e,  
04:01:49e, 04:01:50e / DPB1\* 213:01:01e,  
213:01:02e / DPB1\* 334:01:01e, 334:01:02e /  
DPB1\* 350:01e / DPB1\* 415:01e / DPB1\*  
459:01e / DPB1\* 464:01e / DPB1\*  
523:01:01e, 523:01:02e / DPB1\* 534:01e /  
DPB1\* 615:01e / DPB1\* 618:01e / DPB1\*  
670:01e / DPB1\* 677:01e / DPB1\* 699:01e /  
DPB1\* 755:01e / DPB1\* 757:01e / DPB1\*  
765:01e / DPB1\* 767:01e / DPB1\* 784:01e /  
DPB1\* 804:01e / DPB1\* 806:01:01:01e,  
806:01:01:02e / DPB1\* 813:01e / DPB1\*  
820:01e / DPB1\* 824:01:01e, 824:01:02e /  
DPB1\* 826:01e / DPB1\* 850:01e / DPB1\*  
859:01e / DPB1\* 880:01e / DPB1\* 882:01e /  
DPB1\* 926:01e / DPB1\* 932:01e / DPB1\*  
939:01e / DPB1\* 978:01e / DPB1\* 988:01e /  
DPB1\* 989:01e / DPB1\* 992:01e / DPB1\*  
997:01e / DPB1\* 1001:01e / DPB1\*  
1002:01e / DPB1\* 1003:01e / DPB1\*  
1004:01e / DPB1\* 1010:01e / DPB1\*  
1011:01e / DPB1\* 1023:01e / DPB1\*  
1033:01e / DPB1\* 1074:01e / DPB1\*  
1086:01e / DPB1\* 1091:01e / DPB1\*  
1100:01e / DPB1\* 1129:01e / DPB1\*  
1132:01e / DPB1\* 1146:01e / DPB1\*  
1148:01Qe / DPB1\* 1152:01e / DPB1\*  
1155:01e / DPB1\* 1161:01e / DPB1\*  
1164:01e

DPB1\* 04:01:01:24Ne / DPB1\* 99:01e /  
DPB1\* 120:01Ne / DPB1\* 121:01e / DPB1\*  
128:01e / DPB1\* 134:01e / DPB1\* 149:01e /  
DPB1\* 169:01e / DPB1\* 174:01e / DPB1\*  
175:01e / DPB1\* 180:01e / DPB1\* 181:01e /  
DPB1\* 192:01e / DPB1\* 193:01e / DPB1\*  
194:01e / DPB1\* 195:01e / DPB1\* 212:01e /  
DPB1\* 224:01e / DPB1\* 225:01e / DPB1\*  
228:01e / DPB1\* 231:01e / DPB1\* 232:01e /  
DPB1\* 240:01e / DPB1\* 253:01e / DPB1\*  
255:01e / DPB1\* 262:01e / DPB1\* 272:01e /  
DPB1\* 275:01e / DPB1\* 276:01e / DPB1\*  
281:01e / DPB1\* 282:01e / DPB1\* 283:01e /  
DPB1\* 298:01e / DPB1\* 320:01e / DPB1\*  
323:01e / DPB1\* 335:01e / DPB1\* 336:01e /  
DPB1\* 341:01e / DPB1\* 356:01e / DPB1\*  
360:01e / DPB1\* 372:01e / DPB1\* 376:01e /  
DPB1\* 378:01e / DPB1\* 396:01e / DPB1\*  
397:01e / DPB1\* 418:01e / DPB1\* 425:01e /  
DPB1\* 426:01e / DPB1\* 428:01e / DPB1\*  
434:01e / DPB1\* 453:01e / DPB1\* 455:01Ne /  
DPB1\* 465:01e / DPB1\* 468:01e / DPB1\*  
475:01e / DPB1\* 476:01e / DPB1\* 479:01e /

-

DPB1\* 485:01e / DPB1\* 486:01e / DPB1\* 487:01e / DPB1\* 497:01e / DPB1\* 500:01e / DPB1\* 520:01e / DPB1\* 521:01e / DPB1\* 522:01e / DPB1\* 524:01e / DPB1\* 529:01e / DPB1\* 553:01e / DPB1\* 554:01e / DPB1\* 556:01e / DPB1\* 559:01e / DPB1\* 569:01e / DPB1\* 575:01e / DPB1\* 578:01e / DPB1\* 583:01e / DPB1\* 591:01e / DPB1\* 593:01e / DPB1\* 607:01e / DPB1\* 614:01e / DPB1\* 625:01e / DPB1\* 643:01e / DPB1\* 658:01e / DPB1\* 666:01e / DPB1\* 682:01e / DPB1\* 683:01e / DPB1\* 694:01e / DPB1\* 722:01e / DPB1\* 739:01e / DPB1\* 742:01e / DPB1\* 750:01e / DPB1\* 754:01Ne / DPB1\* 756:01Ne / DPB1\* 758:01e / DPB1\* 761:01e / DPB1\* 769:01e / DPB1\* 772:01e / DPB1\* 773:01e / DPB1\* 788:01e / DPB1\* 795:01e / DPB1\* 803:01e / DPB1\* 808:01e / DPB1\* 811:01e / DPB1\* 812:01e / DPB1\* 814:01e / DPB1\* 837:01e / DPB1\* 842:01e / DPB1\* 852:01e / DPB1\* 878:01Ne / DPB1\* 895:01e / DPB1\* 915:01e / DPB1\* 957:01e / DPB1\* 966:01e / DPB1\* 974:01Ne / DPB1\* 993:01e / DPB1\* 1040:01e / DPB1\* 1042:01e / DPB1\* 1048:01e / DPB1\* 1060:01e / DPB1\* 1062:01e / DPB1\* 1064:01e / DPB1\* 1066:01e / DPB1\* 1108:01e / DPB1\* 1112:01Ne / DPB1\* 1113:01e / DPB1\* 1121:01Ne / DPB1\* 1139:01e / DPB1\* 1167:01e

**EDP218**

DPB1\* 696:01Ne / DPB1\* 838:01Ne / DPB1\* 868:01Ne / DPB1\* 1079:01Ne

4 rare

-

LFQG

-

-

-

-

-

*One side of this epitope requires a RARE allele, review results to confirm assignment.*

OR

| EPITYPE                              | ALLELES                                                                                                                                                                                                                                                                                                                                                                                                                                                                                                                                                                                                                                                                                                                                                                                                                                                                                                                                                                                        | P GROUP                                 | HVR-A | HVR-B | HVR-C | HVR-D | HVR-E | HVR-F |
|--------------------------------------|------------------------------------------------------------------------------------------------------------------------------------------------------------------------------------------------------------------------------------------------------------------------------------------------------------------------------------------------------------------------------------------------------------------------------------------------------------------------------------------------------------------------------------------------------------------------------------------------------------------------------------------------------------------------------------------------------------------------------------------------------------------------------------------------------------------------------------------------------------------------------------------------------------------------------------------------------------------------------------------------|-----------------------------------------|-------|-------|-------|-------|-------|-------|
| <b>EDP04</b><br>1 common<br>291 rare | DPB1* 04:01:01:01, 04:01:01:02e, 04:01:01:03e, 04:01:01:04e, 04:01:01:05e, 04:01:01:06e, 04:01:01:07e, 04:01:01:08e, 04:01:01:09e, 04:01:01:10e, 04:01:01:11e, 04:01:01:12e, 04:01:01:13e, 04:01:01:14e, 04:01:01:15e, 04:01:01:16e, 04:01:01:17e, 04:01:01:18e, 04:01:01:19e, 04:01:01:20e, 04:01:01:21e, 04:01:01:22e, 04:01:01:23e, 04:01:01:25e, 04:01:01:26e, 04:01:01:27e, 04:01:01:28e, 04:01:01:29e, 04:01:01:30e, 04:01:01:31e, 04:01:01:32e, 04:01:01:33e, 04:01:01:34e, 04:01:01:35e, 04:01:01:36e, 04:01:01:37e, 04:01:01:38e, 04:01:01:39e, 04:01:01:40e, 04:01:01:41e, 04:01:01:42e, 04:01:01:43e, 04:01:01:44e, 04:01:01:45e, 04:01:01:46e, 04:01:01:47e, 04:01:01:48e, 04:01:01:49e, 04:01:01:50e, 04:01:01:51e, 04:01:01:52e, 04:01:01:53e, 04:01:02e, 04:01:03e, 04:01:04:01e, 04:01:04:02e, 04:01:05e, 04:01:06e, 04:01:07e, 04:01:08e, 04:01:09e, 04:01:10e, 04:01:11e, 04:01:12e, 04:01:13e, 04:01:14e, 04:01:15e, 04:01:16e, 04:01:17e, 04:01:18e, 04:01:19e, 04:01:20e, | 04:01P<br>213:01P<br>334:01P<br>523:01P | LFQG  | EEFA  | AAE   | ILEEK | M     | GGPM  |

04:01:21e, 04:01:22e, 04:01:23e, 04:01:24e,  
04:01:25e, 04:01:26e, 04:01:27e, 04:01:28e,  
04:01:29e, 04:01:30e, 04:01:31e, 04:01:32e,  
04:01:33e, 04:01:34e, 04:01:35e, 04:01:36e,  
04:01:37:01e, 04:01:37:02e, 04:01:38e,  
04:01:39:01e, 04:01:39:02e, 04:01:40e,  
04:01:41e, 04:01:42e, 04:01:43e, 04:01:44e,  
04:01:45e, 04:01:46e, 04:01:47e, 04:01:48e,  
04:01:49e, 04:01:50e / DPB1\* 213:01:01e,  
213:01:02e / DPB1\* 334:01:01e, 334:01:02e /  
DPB1\* 350:01e / DPB1\* 415:01e / DPB1\*  
459:01e / DPB1\* 464:01e / DPB1\*  
523:01:01e, 523:01:02e / DPB1\* 534:01e /  
DPB1\* 615:01e / DPB1\* 618:01e / DPB1\*  
670:01e / DPB1\* 677:01e / DPB1\* 699:01e /  
DPB1\* 755:01e / DPB1\* 757:01e / DPB1\*  
765:01e / DPB1\* 767:01e / DPB1\* 784:01e /  
DPB1\* 804:01e / DPB1\* 806:01:01:01e,  
806:01:01:02e / DPB1\* 813:01e / DPB1\*  
820:01e / DPB1\* 824:01:01e, 824:01:02e /  
DPB1\* 826:01e / DPB1\* 850:01e / DPB1\*  
859:01e / DPB1\* 880:01e / DPB1\* 882:01e /  
DPB1\* 926:01e / DPB1\* 932:01e / DPB1\*  
939:01e / DPB1\* 978:01e / DPB1\* 988:01e /  
DPB1\* 989:01e / DPB1\* 992:01e / DPB1\*  
997:01e / DPB1\* 1001:01e / DPB1\*  
1002:01e / DPB1\* 1003:01e / DPB1\*  
1004:01e / DPB1\* 1010:01e / DPB1\*  
1011:01e / DPB1\* 1023:01e / DPB1\*  
1033:01e / DPB1\* 1074:01e / DPB1\*  
1086:01e / DPB1\* 1091:01e / DPB1\*  
1100:01e / DPB1\* 1129:01e / DPB1\*  
1132:01e / DPB1\* 1146:01e / DPB1\*  
1148:01Qe / DPB1\* 1152:01e / DPB1\*  
1155:01e / DPB1\* 1161:01e / DPB1\*  
1164:01e

DPB1\* 04:01:01:24Ne / DPB1\* 99:01e /  
DPB1\* 120:01Ne / DPB1\* 121:01e / DPB1\*  
128:01e / DPB1\* 134:01e / DPB1\* 149:01e /  
DPB1\* 169:01e / DPB1\* 174:01e / DPB1\*  
175:01e / DPB1\* 180:01e / DPB1\* 181:01e /  
DPB1\* 192:01e / DPB1\* 193:01e / DPB1\*  
194:01e / DPB1\* 195:01e / DPB1\* 212:01e /  
DPB1\* 224:01e / DPB1\* 225:01e / DPB1\*  
228:01e / DPB1\* 231:01e / DPB1\* 232:01e /  
DPB1\* 240:01e / DPB1\* 253:01e / DPB1\*  
255:01e / DPB1\* 262:01e / DPB1\* 272:01e /  
DPB1\* 275:01e / DPB1\* 276:01e / DPB1\*  
281:01e / DPB1\* 282:01e / DPB1\* 283:01e /  
DPB1\* 298:01e / DPB1\* 320:01e / DPB1\*  
323:01e / DPB1\* 335:01e / DPB1\* 336:01e /  
DPB1\* 341:01e / DPB1\* 356:01e / DPB1\*  
360:01e / DPB1\* 372:01e / DPB1\* 376:01e /  
DPB1\* 378:01e / DPB1\* 396:01e / DPB1\*  
397:01e / DPB1\* 418:01e / DPB1\* 425:01e /  
DPB1\* 426:01e / DPB1\* 428:01e / DPB1\*  
434:01e / DPB1\* 453:01e / DPB1\* 455:01Ne /  
DPB1\* 465:01e / DPB1\* 468:01e / DPB1\*  
475:01e / DPB1\* 476:01e / DPB1\* 479:01e /  
DPB1\* 485:01e / DPB1\* 486:01e / DPB1\*  
487:01e / DPB1\* 497:01e / DPB1\* 500:01e /  
DPB1\* 520:01e / DPB1\* 521:01e / DPB1\*  
522:01e / DPB1\* 524:01e / DPB1\* 529:01e /  
DPB1\* 553:01e / DPB1\* 554:01e / DPB1\*  
556:01e / DPB1\* 559:01e / DPB1\* 569:01e /

-

DPB1\* 575:01e / DPB1\* 578:01e / DPB1\* 583:01e / DPB1\* 591:01e / DPB1\* 593:01e / DPB1\* 607:01e / DPB1\* 614:01e / DPB1\* 625:01e / DPB1\* 643:01e / DPB1\* 658:01e / DPB1\* 666:01e / DPB1\* 682:01e / DPB1\* 683:01e / DPB1\* 694:01e / DPB1\* 722:01e / DPB1\* 739:01e / DPB1\* 742:01e / DPB1\* 750:01e / DPB1\* 754:01Ne / DPB1\* 756:01Ne / DPB1\* 758:01e / DPB1\* 761:01e / DPB1\* 769:01e / DPB1\* 772:01e / DPB1\* 773:01e / DPB1\* 788:01e / DPB1\* 795:01e / DPB1\* 803:01e / DPB1\* 808:01e / DPB1\* 811:01e / DPB1\* 812:01e / DPB1\* 814:01e / DPB1\* 837:01e / DPB1\* 842:01e / DPB1\* 852:01e / DPB1\* 878:01Ne / DPB1\* 895:01e / DPB1\* 915:01e / DPB1\* 957:01e / DPB1\* 966:01e / DPB1\* 974:01Ne / DPB1\* 993:01e / DPB1\* 1040:01e / DPB1\* 1042:01e / DPB1\* 1048:01e / DPB1\* 1060:01e / DPB1\* 1062:01e / DPB1\* 1064:01e / DPB1\* 1066:01e / DPB1\* 1108:01e / DPB1\* 1112:01Ne / DPB1\* 1113:01e / DPB1\* 1121:01Ne / DPB1\* 1139:01e / DPB1\* 1167:01e

**EDP216**

DPB1\* 216:01Ne / DPB1\* 357:01Ne / DPB1\* 1044:01Ne

3 rare

|   |      |      |     |       |   |   |
|---|------|------|-----|-------|---|---|
| - | LFQG | EEFA | AAE | ILEEK | M | - |
|---|------|------|-----|-------|---|---|

*One side of this epitype requires a RARE allele, review results to confirm assignment.*

OR

| EPITYPE                              | ALLELES                                                                                                                                                                                                                                                                                                                                                                                                                                                                                                                                                                                                                                                                                                                                                                                                                                                                                                                                                                                                                                                                                                                                                                                                                                                      | P GROUP                                 | HVR-A | HVR-B | HVR-C | HVR-D | HVR-E | HVR-F |
|--------------------------------------|--------------------------------------------------------------------------------------------------------------------------------------------------------------------------------------------------------------------------------------------------------------------------------------------------------------------------------------------------------------------------------------------------------------------------------------------------------------------------------------------------------------------------------------------------------------------------------------------------------------------------------------------------------------------------------------------------------------------------------------------------------------------------------------------------------------------------------------------------------------------------------------------------------------------------------------------------------------------------------------------------------------------------------------------------------------------------------------------------------------------------------------------------------------------------------------------------------------------------------------------------------------|-----------------------------------------|-------|-------|-------|-------|-------|-------|
| <b>EDP04</b><br>1 common<br>291 rare | DPB1* 04:01:01:01, 04:01:01:02e, 04:01:01:03e, 04:01:01:04e, 04:01:01:05e, 04:01:01:06e, 04:01:01:07e, 04:01:01:08e, 04:01:01:09e, 04:01:01:10e, 04:01:01:11e, 04:01:01:12e, 04:01:01:13e, 04:01:01:14e, 04:01:01:15e, 04:01:01:16e, 04:01:01:17e, 04:01:01:18e, 04:01:01:19e, 04:01:01:20e, 04:01:01:21e, 04:01:01:22e, 04:01:01:23e, 04:01:01:25e, 04:01:01:26e, 04:01:01:27e, 04:01:01:28e, 04:01:01:29e, 04:01:01:30e, 04:01:01:31e, 04:01:01:32e, 04:01:01:33e, 04:01:01:34e, 04:01:01:35e, 04:01:01:36e, 04:01:01:37e, 04:01:01:38e, 04:01:01:39e, 04:01:01:40e, 04:01:01:41e, 04:01:01:42e, 04:01:01:43e, 04:01:01:44e, 04:01:01:45e, 04:01:01:46e, 04:01:01:47e, 04:01:01:48e, 04:01:01:49e, 04:01:01:50e, 04:01:01:51e, 04:01:01:52e, 04:01:01:53e, 04:01:02e, 04:01:03e, 04:01:04:01e, 04:01:04:02e, 04:01:05e, 04:01:06e, 04:01:07e, 04:01:08e, 04:01:09e, 04:01:10e, 04:01:11e, 04:01:12e, 04:01:13e, 04:01:14e, 04:01:15e, 04:01:16e, 04:01:17e, 04:01:18e, 04:01:19e, 04:01:20e, 04:01:21e, 04:01:22e, 04:01:23e, 04:01:24e, 04:01:25e, 04:01:26e, 04:01:27e, 04:01:28e, 04:01:29e, 04:01:30e, 04:01:31e, 04:01:32e, 04:01:33e, 04:01:34e, 04:01:35e, 04:01:36e, 04:01:37:01e, 04:01:37:02e, 04:01:38e, 04:01:39:01e, 04:01:39:02e, 04:01:40e, | 04:01P<br>213:01P<br>334:01P<br>523:01P | LFQG  | EEFA  | AAE   | ILEEK | M     | GGPM  |

04:01:41e, 04:01:42e, 04:01:43e, 04:01:44e,  
04:01:45e, 04:01:46e, 04:01:47e, 04:01:48e,  
04:01:49e, 04:01:50e / DPB1\* 213:01:01e,  
213:01:02e / DPB1\* 334:01:01e, 334:01:02e /  
DPB1\* 350:01e / DPB1\* 415:01e / DPB1\*  
459:01e / DPB1\* 464:01e / DPB1\*  
523:01:01e, 523:01:02e / DPB1\* 534:01e /  
DPB1\* 615:01e / DPB1\* 618:01e / DPB1\*  
670:01e / DPB1\* 677:01e / DPB1\* 699:01e /  
DPB1\* 755:01e / DPB1\* 757:01e / DPB1\*  
765:01e / DPB1\* 767:01e / DPB1\* 784:01e /  
DPB1\* 804:01e / DPB1\* 806:01:01:01e,  
806:01:01:02e / DPB1\* 813:01e / DPB1\*  
820:01e / DPB1\* 824:01:01e, 824:01:02e /  
DPB1\* 826:01e / DPB1\* 850:01e / DPB1\*  
859:01e / DPB1\* 880:01e / DPB1\* 882:01e /  
DPB1\* 926:01e / DPB1\* 932:01e / DPB1\*  
939:01e / DPB1\* 978:01e / DPB1\* 988:01e /  
DPB1\* 989:01e / DPB1\* 992:01e / DPB1\*  
997:01e / DPB1\* 1001:01e / DPB1\*  
1002:01e / DPB1\* 1003:01e / DPB1\*  
1004:01e / DPB1\* 1010:01e / DPB1\*  
1011:01e / DPB1\* 1023:01e / DPB1\*  
1033:01e / DPB1\* 1074:01e / DPB1\*  
1086:01e / DPB1\* 1091:01e / DPB1\*  
1100:01e / DPB1\* 1129:01e / DPB1\*  
1132:01e / DPB1\* 1146:01e / DPB1\*  
1148:01Qe / DPB1\* 1152:01e / DPB1\*  
1155:01e / DPB1\* 1161:01e / DPB1\*  
1164:01e

DPB1\* 04:01:01:24Ne / DPB1\* 99:01e /  
DPB1\* 120:01Ne / DPB1\* 121:01e / DPB1\*  
128:01e / DPB1\* 134:01e / DPB1\* 149:01e /  
DPB1\* 169:01e / DPB1\* 174:01e / DPB1\*  
175:01e / DPB1\* 180:01e / DPB1\* 181:01e /  
DPB1\* 192:01e / DPB1\* 193:01e / DPB1\*  
194:01e / DPB1\* 195:01e / DPB1\* 212:01e /  
DPB1\* 224:01e / DPB1\* 225:01e / DPB1\*  
228:01e / DPB1\* 231:01e / DPB1\* 232:01e /  
DPB1\* 240:01e / DPB1\* 253:01e / DPB1\*  
255:01e / DPB1\* 262:01e / DPB1\* 272:01e /  
DPB1\* 275:01e / DPB1\* 276:01e / DPB1\*  
281:01e / DPB1\* 282:01e / DPB1\* 283:01e /  
DPB1\* 298:01e / DPB1\* 320:01e / DPB1\*  
323:01e / DPB1\* 335:01e / DPB1\* 336:01e /  
DPB1\* 341:01e / DPB1\* 356:01e / DPB1\*  
360:01e / DPB1\* 372:01e / DPB1\* 376:01e /  
DPB1\* 378:01e / DPB1\* 396:01e / DPB1\*  
397:01e / DPB1\* 418:01e / DPB1\* 425:01e /  
DPB1\* 426:01e / DPB1\* 428:01e / DPB1\*  
434:01e / DPB1\* 453:01e / DPB1\* 455:01Ne /  
DPB1\* 465:01e / DPB1\* 468:01e / DPB1\*  
475:01e / DPB1\* 476:01e / DPB1\* 479:01e /  
DPB1\* 485:01e / DPB1\* 486:01e / DPB1\*  
487:01e / DPB1\* 497:01e / DPB1\* 500:01e /  
DPB1\* 520:01e / DPB1\* 521:01e / DPB1\*  
522:01e / DPB1\* 524:01e / DPB1\* 529:01e /  
DPB1\* 553:01e / DPB1\* 554:01e / DPB1\*  
556:01e / DPB1\* 559:01e / DPB1\* 569:01e /  
DPB1\* 575:01e / DPB1\* 578:01e / DPB1\*  
583:01e / DPB1\* 591:01e / DPB1\* 593:01e /  
DPB1\* 607:01e / DPB1\* 614:01e / DPB1\*  
625:01e / DPB1\* 643:01e / DPB1\* 658:01e /  
DPB1\* 666:01e / DPB1\* 682:01e / DPB1\*  
683:01e / DPB1\* 694:01e / DPB1\* 722:01e /

-



|                                                                                               |                                                                                                                                                                                                                                                                                                                                                                                                                                                                                                                                                                                                                                                                                  |   |      |      |     |   |   |   |  |
|-----------------------------------------------------------------------------------------------|----------------------------------------------------------------------------------------------------------------------------------------------------------------------------------------------------------------------------------------------------------------------------------------------------------------------------------------------------------------------------------------------------------------------------------------------------------------------------------------------------------------------------------------------------------------------------------------------------------------------------------------------------------------------------------|---|------|------|-----|---|---|---|--|
|                                                                                               | DPB1* 739:01e / DPB1* 742:01e / DPB1* 750:01e / DPB1* 754:01Ne / DPB1* 756:01Ne / DPB1* 758:01e / DPB1* 761:01e / DPB1* 769:01e / DPB1* 772:01e / DPB1* 773:01e / DPB1* 788:01e / DPB1* 795:01e / DPB1* 803:01e / DPB1* 808:01e / DPB1* 811:01e / DPB1* 812:01e / DPB1* 814:01e / DPB1* 837:01e / DPB1* 842:01e / DPB1* 852:01e / DPB1* 878:01Ne / DPB1* 895:01e / DPB1* 915:01e / DPB1* 957:01e / DPB1* 966:01e / DPB1* 974:01Ne / DPB1* 993:01e / DPB1* 1040:01e / DPB1* 1042:01e / DPB1* 1048:01e / DPB1* 1060:01e / DPB1* 1062:01e / DPB1* 1064:01e / DPB1* 1066:01e / DPB1* 1108:01e / DPB1* 1112:01Ne / DPB1* 1113:01e / DPB1* 1121:01Ne / DPB1* 1139:01e / DPB1* 1167:01e |   |      |      |     |   |   |   |  |
| <b>EDP743</b><br>3 rare                                                                       | DPB1* 743:01Ne / DPB1* 748:01Ne / DPB1* 844:01Ne                                                                                                                                                                                                                                                                                                                                                                                                                                                                                                                                                                                                                                 | - | LFQG | EEFA | AAE | - | - | - |  |
| <i>One side of this epitope requires a RARE allele, review results to confirm assignment.</i> |                                                                                                                                                                                                                                                                                                                                                                                                                                                                                                                                                                                                                                                                                  |   |      |      |     |   |   |   |  |

OR

| EPITYPE                              | ALLELES                                                                                                                                                                                                                                                                                                                                                                                                                                                                                                                                                                                                                                                                                                                                                                                                                                                                                                                                                                                                                                                                                                                                                                                                                                                                                                                                                                                                                                                                                                         | P GROUP                                 | HVR-A | HVR-B | HVR-C | HVR-D | HVR-E | HVR-F |
|--------------------------------------|-----------------------------------------------------------------------------------------------------------------------------------------------------------------------------------------------------------------------------------------------------------------------------------------------------------------------------------------------------------------------------------------------------------------------------------------------------------------------------------------------------------------------------------------------------------------------------------------------------------------------------------------------------------------------------------------------------------------------------------------------------------------------------------------------------------------------------------------------------------------------------------------------------------------------------------------------------------------------------------------------------------------------------------------------------------------------------------------------------------------------------------------------------------------------------------------------------------------------------------------------------------------------------------------------------------------------------------------------------------------------------------------------------------------------------------------------------------------------------------------------------------------|-----------------------------------------|-------|-------|-------|-------|-------|-------|
| <b>EDP04</b><br>1 common<br>291 rare | DPB1* 04:01:01:01, 04:01:01:02e, 04:01:01:03e, 04:01:01:04e, 04:01:01:05e, 04:01:01:06e, 04:01:01:07e, 04:01:01:08e, 04:01:01:09e, 04:01:01:10e, 04:01:01:11e, 04:01:01:12e, 04:01:01:13e, 04:01:01:14e, 04:01:01:15e, 04:01:01:16e, 04:01:01:17e, 04:01:01:18e, 04:01:01:19e, 04:01:01:20e, 04:01:01:21e, 04:01:01:22e, 04:01:01:23e, 04:01:01:25e, 04:01:01:26e, 04:01:01:27e, 04:01:01:28e, 04:01:01:29e, 04:01:01:30e, 04:01:01:31e, 04:01:01:32e, 04:01:01:33e, 04:01:01:34e, 04:01:01:35e, 04:01:01:36e, 04:01:01:37e, 04:01:01:38e, 04:01:01:39e, 04:01:01:40e, 04:01:01:41e, 04:01:01:42e, 04:01:01:43e, 04:01:01:44e, 04:01:01:45e, 04:01:01:46e, 04:01:01:47e, 04:01:01:48e, 04:01:01:49e, 04:01:01:50e, 04:01:01:51e, 04:01:01:52e, 04:01:01:53e, 04:01:02e, 04:01:03e, 04:01:04:01e, 04:01:04:02e, 04:01:05e, 04:01:06e, 04:01:07e, 04:01:08e, 04:01:09e, 04:01:10e, 04:01:11e, 04:01:12e, 04:01:13e, 04:01:14e, 04:01:15e, 04:01:16e, 04:01:17e, 04:01:18e, 04:01:19e, 04:01:20e, 04:01:21e, 04:01:22e, 04:01:23e, 04:01:24e, 04:01:25e, 04:01:26e, 04:01:27e, 04:01:28e, 04:01:29e, 04:01:30e, 04:01:31e, 04:01:32e, 04:01:33e, 04:01:34e, 04:01:35e, 04:01:36e, 04:01:37:01e, 04:01:37:02e, 04:01:38e, 04:01:39:01e, 04:01:39:02e, 04:01:40e, 04:01:41e, 04:01:42e, 04:01:43e, 04:01:44e, 04:01:45e, 04:01:46e, 04:01:47e, 04:01:48e, 04:01:49e, 04:01:50e / DPB1* 213:01:01e, 213:01:02e / DPB1* 334:01:01e, 334:01:02e / DPB1* 350:01e / DPB1* 415:01e / DPB1* 459:01e / DPB1* 464:01e / DPB1* | 04:01P<br>213:01P<br>334:01P<br>523:01P | LFQG  | EEFA  | AAE   | ILEEK | M     | GGPM  |

523:01:01e, 523:01:02e / DPB1\* 534:01e /  
DPB1\* 615:01e / DPB1\* 618:01e / DPB1\*  
670:01e / DPB1\* 677:01e / DPB1\* 699:01e /  
DPB1\* 755:01e / DPB1\* 757:01e / DPB1\*  
765:01e / DPB1\* 767:01e / DPB1\* 784:01e /  
DPB1\* 804:01e / DPB1\* 806:01:01:01e,  
806:01:01:02e / DPB1\* 813:01e / DPB1\*  
820:01e / DPB1\* 824:01:01e, 824:01:02e /  
DPB1\* 826:01e / DPB1\* 850:01e / DPB1\*  
859:01e / DPB1\* 880:01e / DPB1\* 882:01e /  
DPB1\* 926:01e / DPB1\* 932:01e / DPB1\*  
939:01e / DPB1\* 978:01e / DPB1\* 988:01e /  
DPB1\* 989:01e / DPB1\* 992:01e / DPB1\*  
997:01e / DPB1\* 1001:01e / DPB1\*  
1002:01e / DPB1\* 1003:01e / DPB1\*  
1004:01e / DPB1\* 1010:01e / DPB1\*  
1011:01e / DPB1\* 1023:01e / DPB1\*  
1033:01e / DPB1\* 1074:01e / DPB1\*  
1086:01e / DPB1\* 1091:01e / DPB1\*  
1100:01e / DPB1\* 1129:01e / DPB1\*  
1132:01e / DPB1\* 1146:01e / DPB1\*  
1148:01Qe / DPB1\* 1152:01e / DPB1\*  
1155:01e / DPB1\* 1161:01e / DPB1\*  
1164:01e

DPB1\* 04:01:01:24Ne / DPB1\* 99:01e /  
DPB1\* 120:01Ne / DPB1\* 121:01e / DPB1\*  
128:01e / DPB1\* 134:01e / DPB1\* 149:01e /  
DPB1\* 169:01e / DPB1\* 174:01e / DPB1\*  
175:01e / DPB1\* 180:01e / DPB1\* 181:01e /  
DPB1\* 192:01e / DPB1\* 193:01e / DPB1\*  
194:01e / DPB1\* 195:01e / DPB1\* 212:01e /  
DPB1\* 224:01e / DPB1\* 225:01e / DPB1\*  
228:01e / DPB1\* 231:01e / DPB1\* 232:01e /  
DPB1\* 240:01e / DPB1\* 253:01e / DPB1\*  
255:01e / DPB1\* 262:01e / DPB1\* 272:01e /  
DPB1\* 275:01e / DPB1\* 276:01e / DPB1\*  
281:01e / DPB1\* 282:01e / DPB1\* 283:01e /  
DPB1\* 298:01e / DPB1\* 320:01e / DPB1\*  
323:01e / DPB1\* 335:01e / DPB1\* 336:01e /  
DPB1\* 341:01e / DPB1\* 356:01e / DPB1\*  
360:01e / DPB1\* 372:01e / DPB1\* 376:01e /  
DPB1\* 378:01e / DPB1\* 396:01e / DPB1\*  
397:01e / DPB1\* 418:01e / DPB1\* 425:01e /  
DPB1\* 426:01e / DPB1\* 428:01e / DPB1\*  
434:01e / DPB1\* 453:01e / DPB1\* 455:01Ne /  
DPB1\* 465:01e / DPB1\* 468:01e / DPB1\*  
475:01e / DPB1\* 476:01e / DPB1\* 479:01e /  
DPB1\* 485:01e / DPB1\* 486:01e / DPB1\*  
487:01e / DPB1\* 497:01e / DPB1\* 500:01e /  
DPB1\* 520:01e / DPB1\* 521:01e / DPB1\*  
522:01e / DPB1\* 524:01e / DPB1\* 529:01e /  
DPB1\* 553:01e / DPB1\* 554:01e / DPB1\*  
556:01e / DPB1\* 559:01e / DPB1\* 569:01e /  
DPB1\* 575:01e / DPB1\* 578:01e / DPB1\*  
583:01e / DPB1\* 591:01e / DPB1\* 593:01e /  
DPB1\* 607:01e / DPB1\* 614:01e / DPB1\*  
625:01e / DPB1\* 643:01e / DPB1\* 658:01e /  
DPB1\* 666:01e / DPB1\* 682:01e / DPB1\*  
683:01e / DPB1\* 694:01e / DPB1\* 722:01e /  
DPB1\* 739:01e / DPB1\* 742:01e / DPB1\*  
750:01e / DPB1\* 754:01Ne / DPB1\*  
756:01Ne / DPB1\* 758:01e / DPB1\* 761:01e /  
DPB1\* 769:01e / DPB1\* 772:01e / DPB1\*  
773:01e / DPB1\* 788:01e / DPB1\* 795:01e /  
DPB1\* 803:01e / DPB1\* 808:01e / DPB1\*

-

811:01e / DPB1\* 812:01e / DPB1\* 814:01e /  
 DPB1\* 837:01e / DPB1\* 842:01e / DPB1\*  
 852:01e / DPB1\* 878:01Ne / DPB1\* 895:01e /  
 DPB1\* 915:01e / DPB1\* 957:01e / DPB1\*  
 966:01e / DPB1\* 974:01Ne / DPB1\* 993:01e /  
 DPB1\* 1040:01e / DPB1\* 1042:01e / DPB1\*  
 1048:01e / DPB1\* 1060:01e / DPB1\*  
 1062:01e / DPB1\* 1064:01e / DPB1\*  
 1066:01e / DPB1\* 1108:01e / DPB1\*  
 1112:01Ne / DPB1\* 1113:01e / DPB1\*  
 1121:01Ne / DPB1\* 1139:01e / DPB1\*  
 1167:01e

**EDP227**  
 3 rare

DPB1\* 227:01:01e, 227:01:02e, 227:01:03e

227:01P

LFQG

EELA

AAE

ILEEK

M

GGPM

*One side of this epitope requires a RARE allele, review results to confirm assignment.*

OR

| EPITYPE                              | ALLELES                                                                                                                                                                                                                                                                                                                                                                                                                                                                                                                                                                                                                                                                                                                                                                                                                                                                                                                                                                                                                                                                                                                                                                                                                                                                                                                                                                                                                                                                                                                                                                                                                                                                                                                                                                                                                                                                                                                                                                                                                                                                                                                                                                                                                                                                                                                                                                                      | P GROUP                                                                            | HVR-A | HVR-B | HVR-C | HVR-D | HVR-E | HVR-F |
|--------------------------------------|----------------------------------------------------------------------------------------------------------------------------------------------------------------------------------------------------------------------------------------------------------------------------------------------------------------------------------------------------------------------------------------------------------------------------------------------------------------------------------------------------------------------------------------------------------------------------------------------------------------------------------------------------------------------------------------------------------------------------------------------------------------------------------------------------------------------------------------------------------------------------------------------------------------------------------------------------------------------------------------------------------------------------------------------------------------------------------------------------------------------------------------------------------------------------------------------------------------------------------------------------------------------------------------------------------------------------------------------------------------------------------------------------------------------------------------------------------------------------------------------------------------------------------------------------------------------------------------------------------------------------------------------------------------------------------------------------------------------------------------------------------------------------------------------------------------------------------------------------------------------------------------------------------------------------------------------------------------------------------------------------------------------------------------------------------------------------------------------------------------------------------------------------------------------------------------------------------------------------------------------------------------------------------------------------------------------------------------------------------------------------------------------|------------------------------------------------------------------------------------|-------|-------|-------|-------|-------|-------|
| <b>EDP04</b><br>1 common<br>291 rare | <p>DPB1* 04:01:01:01, 04:01:01:02e,<br/>           04:01:01:03e, 04:01:01:04e, 04:01:01:05e,<br/>           04:01:01:06e, 04:01:01:07e, 04:01:01:08e,<br/>           04:01:01:09e, 04:01:01:10e, 04:01:01:11e,<br/>           04:01:01:12e, 04:01:01:13e, 04:01:01:14e,<br/>           04:01:01:15e, 04:01:01:16e, 04:01:01:17e,<br/>           04:01:01:18e, 04:01:01:19e, 04:01:01:20e,<br/>           04:01:01:21e, 04:01:01:22e, 04:01:01:23e,<br/>           04:01:01:25e, 04:01:01:26e, 04:01:01:27e,<br/>           04:01:01:28e, 04:01:01:29e, 04:01:01:30e,<br/>           04:01:01:31e, 04:01:01:32e, 04:01:01:33e,<br/>           04:01:01:34e, 04:01:01:35e, 04:01:01:36e,<br/>           04:01:01:37e, 04:01:01:38e, 04:01:01:39e,<br/>           04:01:01:40e, 04:01:01:41e, 04:01:01:42e,<br/>           04:01:01:43e, 04:01:01:44e, 04:01:01:45e,<br/>           04:01:01:46e, 04:01:01:47e, 04:01:01:48e,<br/>           04:01:01:49e, 04:01:01:50e, 04:01:01:51e,<br/>           04:01:01:52e, 04:01:01:53e, 04:01:02e,<br/>           04:01:03e, 04:01:04:01e, 04:01:04:02e,<br/>           04:01:05e, 04:01:06e, 04:01:07e, 04:01:08e,<br/>           04:01:09e, 04:01:10e, 04:01:11e, 04:01:12e,<br/>           04:01:13e, 04:01:14e, 04:01:15e, 04:01:16e,<br/>           04:01:17e, 04:01:18e, 04:01:19e, 04:01:20e,<br/>           04:01:21e, 04:01:22e, 04:01:23e, 04:01:24e,<br/>           04:01:25e, 04:01:26e, 04:01:27e, 04:01:28e,<br/>           04:01:29e, 04:01:30e, 04:01:31e, 04:01:32e,<br/>           04:01:33e, 04:01:34e, 04:01:35e, 04:01:36e,<br/>           04:01:37:01e, 04:01:37:02e, 04:01:38e,<br/>           04:01:39:01e, 04:01:39:02e, 04:01:40e,<br/>           04:01:41e, 04:01:42e, 04:01:43e, 04:01:44e,<br/>           04:01:45e, 04:01:46e, 04:01:47e, 04:01:48e,<br/>           04:01:49e, 04:01:50e / DPB1* 213:01:01e,<br/>           213:01:02e / DPB1* 334:01:01e, 334:01:02e /<br/>           DPB1* 350:01e / DPB1* 415:01e / DPB1*<br/>           459:01e / DPB1* 464:01e / DPB1*<br/>           523:01:01e, 523:01:02e / DPB1* 534:01e /<br/>           DPB1* 615:01e / DPB1* 618:01e / DPB1*<br/>           670:01e / DPB1* 677:01e / DPB1* 699:01e /<br/>           DPB1* 755:01e / DPB1* 757:01e / DPB1*<br/>           765:01e / DPB1* 767:01e / DPB1* 784:01e /<br/>           DPB1* 804:01e / DPB1* 806:01:01:01e,</p> | <p>04:01P<br/>           213:01P<br/>           334:01P<br/>           523:01P</p> | LFQG  | EEFA  | AAE   | ILEEK | M     | GGPM  |

806:01:01:02e / DPB1\* 813:01e / DPB1\*  
820:01e / DPB1\* 824:01:01e, 824:01:02e /  
DPB1\* 826:01e / DPB1\* 850:01e / DPB1\*  
859:01e / DPB1\* 880:01e / DPB1\* 882:01e /  
DPB1\* 926:01e / DPB1\* 932:01e / DPB1\*  
939:01e / DPB1\* 978:01e / DPB1\* 988:01e /  
DPB1\* 989:01e / DPB1\* 992:01e / DPB1\*  
997:01e / DPB1\* 1001:01e / DPB1\*  
1002:01e / DPB1\* 1003:01e / DPB1\*  
1004:01e / DPB1\* 1010:01e / DPB1\*  
1011:01e / DPB1\* 1023:01e / DPB1\*  
1033:01e / DPB1\* 1074:01e / DPB1\*  
1086:01e / DPB1\* 1091:01e / DPB1\*  
1100:01e / DPB1\* 1129:01e / DPB1\*  
1132:01e / DPB1\* 1146:01e / DPB1\*  
1148:01Qe / DPB1\* 1152:01e / DPB1\*  
1155:01e / DPB1\* 1161:01e / DPB1\*  
1164:01e

DPB1\* 04:01:01:24Ne / DPB1\* 99:01e /  
DPB1\* 120:01Ne / DPB1\* 121:01e / DPB1\*  
128:01e / DPB1\* 134:01e / DPB1\* 149:01e /  
DPB1\* 169:01e / DPB1\* 174:01e / DPB1\*  
175:01e / DPB1\* 180:01e / DPB1\* 181:01e /  
DPB1\* 192:01e / DPB1\* 193:01e / DPB1\*  
194:01e / DPB1\* 195:01e / DPB1\* 212:01e /  
DPB1\* 224:01e / DPB1\* 225:01e / DPB1\*  
228:01e / DPB1\* 231:01e / DPB1\* 232:01e /  
DPB1\* 240:01e / DPB1\* 253:01e / DPB1\*  
255:01e / DPB1\* 262:01e / DPB1\* 272:01e /  
DPB1\* 275:01e / DPB1\* 276:01e / DPB1\*  
281:01e / DPB1\* 282:01e / DPB1\* 283:01e /  
DPB1\* 298:01e / DPB1\* 320:01e / DPB1\*  
323:01e / DPB1\* 335:01e / DPB1\* 336:01e /  
DPB1\* 341:01e / DPB1\* 356:01e / DPB1\*  
360:01e / DPB1\* 372:01e / DPB1\* 376:01e /  
DPB1\* 378:01e / DPB1\* 396:01e / DPB1\*  
397:01e / DPB1\* 418:01e / DPB1\* 425:01e /  
DPB1\* 426:01e / DPB1\* 428:01e / DPB1\*  
434:01e / DPB1\* 453:01e / DPB1\* 455:01Ne /  
DPB1\* 465:01e / DPB1\* 468:01e / DPB1\*  
475:01e / DPB1\* 476:01e / DPB1\* 479:01e /  
DPB1\* 485:01e / DPB1\* 486:01e / DPB1\*  
487:01e / DPB1\* 497:01e / DPB1\* 500:01e /  
DPB1\* 520:01e / DPB1\* 521:01e / DPB1\*  
522:01e / DPB1\* 524:01e / DPB1\* 529:01e /  
DPB1\* 553:01e / DPB1\* 554:01e / DPB1\*  
556:01e / DPB1\* 559:01e / DPB1\* 569:01e /  
DPB1\* 575:01e / DPB1\* 578:01e / DPB1\*  
583:01e / DPB1\* 591:01e / DPB1\* 593:01e /  
DPB1\* 607:01e / DPB1\* 614:01e / DPB1\*  
625:01e / DPB1\* 643:01e / DPB1\* 658:01e /  
DPB1\* 666:01e / DPB1\* 682:01e / DPB1\*  
683:01e / DPB1\* 694:01e / DPB1\* 722:01e /  
DPB1\* 739:01e / DPB1\* 742:01e / DPB1\*  
750:01e / DPB1\* 754:01Ne / DPB1\*  
756:01Ne / DPB1\* 758:01e / DPB1\* 761:01e /  
DPB1\* 769:01e / DPB1\* 772:01e / DPB1\*  
773:01e / DPB1\* 788:01e / DPB1\* 795:01e /  
DPB1\* 803:01e / DPB1\* 808:01e / DPB1\*  
811:01e / DPB1\* 812:01e / DPB1\* 814:01e /  
DPB1\* 837:01e / DPB1\* 842:01e / DPB1\*  
852:01e / DPB1\* 878:01Ne / DPB1\* 895:01e /  
DPB1\* 915:01e / DPB1\* 957:01e / DPB1\*  
966:01e / DPB1\* 974:01Ne / DPB1\* 993:01e /  
DPB1\* 1040:01e / DPB1\* 1042:01e / DPB1\*

-

|                                                                                               |                                                                                                                                                                                                     |   |      |      |     |       |   |      |  |
|-----------------------------------------------------------------------------------------------|-----------------------------------------------------------------------------------------------------------------------------------------------------------------------------------------------------|---|------|------|-----|-------|---|------|--|
|                                                                                               | 1048:01e / DPB1* 1060:01e / DPB1*<br>1062:01e / DPB1* 1064:01e / DPB1*<br>1066:01e / DPB1* 1108:01e / DPB1*<br>1112:01Ne / DPB1* 1113:01e / DPB1*<br>1121:01Ne / DPB1* 1139:01e / DPB1*<br>1167:01e |   |      |      |     |       |   |      |  |
| <b>EDP1016</b>                                                                                | DPB1* 1016:01e / DPB1* 1138:01e                                                                                                                                                                     | - | LLQG | EEFA | AAE | ILEEK | M | GGPM |  |
| 2 rare                                                                                        |                                                                                                                                                                                                     |   |      |      |     |       |   |      |  |
| <i>One side of this epitope requires a RARE allele, review results to confirm assignment.</i> |                                                                                                                                                                                                     |   |      |      |     |       |   |      |  |

**OR**

| EPITYPE                                  | ALLELES                                                                                                                                                                                                                                                                                                                                                                                                                                                                                                                                                                                                                                                                                                                                                                                                                                                                                                                                                                                                                                                                                                                                                                                                                                                                                                                                                                                                                                                                                                                                                                                                                                                                                                                                                                                                                                                                                                                                                                                                                                                                                                                                                        | P GROUP                                 | HVR-A | HVR-B | HVR-C | HVR-D | HVR-E | HVR-F |
|------------------------------------------|----------------------------------------------------------------------------------------------------------------------------------------------------------------------------------------------------------------------------------------------------------------------------------------------------------------------------------------------------------------------------------------------------------------------------------------------------------------------------------------------------------------------------------------------------------------------------------------------------------------------------------------------------------------------------------------------------------------------------------------------------------------------------------------------------------------------------------------------------------------------------------------------------------------------------------------------------------------------------------------------------------------------------------------------------------------------------------------------------------------------------------------------------------------------------------------------------------------------------------------------------------------------------------------------------------------------------------------------------------------------------------------------------------------------------------------------------------------------------------------------------------------------------------------------------------------------------------------------------------------------------------------------------------------------------------------------------------------------------------------------------------------------------------------------------------------------------------------------------------------------------------------------------------------------------------------------------------------------------------------------------------------------------------------------------------------------------------------------------------------------------------------------------------------|-----------------------------------------|-------|-------|-------|-------|-------|-------|
| <b>EDP04</b><br><br>1 common<br>291 rare | <b>DPB1* 04:01:01:01</b> , 04:01:01:02e,<br>04:01:01:03e, 04:01:01:04e, 04:01:01:05e,<br>04:01:01:06e, 04:01:01:07e, 04:01:01:08e,<br>04:01:01:09e, 04:01:01:10e, 04:01:01:11e,<br>04:01:01:12e, 04:01:01:13e, 04:01:01:14e,<br>04:01:01:15e, 04:01:01:16e, 04:01:01:17e,<br>04:01:01:18e, 04:01:01:19e, 04:01:01:20e,<br>04:01:01:21e, 04:01:01:22e, 04:01:01:23e,<br>04:01:01:25e, 04:01:01:26e, 04:01:01:27e,<br>04:01:01:28e, 04:01:01:29e, 04:01:01:30e,<br>04:01:01:31e, 04:01:01:32e, 04:01:01:33e,<br>04:01:01:34e, 04:01:01:35e, 04:01:01:36e,<br>04:01:01:37e, 04:01:01:38e, 04:01:01:39e,<br>04:01:01:40e, 04:01:01:41e, 04:01:01:42e,<br>04:01:01:43e, 04:01:01:44e, 04:01:01:45e,<br>04:01:01:46e, 04:01:01:47e, 04:01:01:48e,<br>04:01:01:49e, 04:01:01:50e, 04:01:01:51e,<br>04:01:01:52e, 04:01:01:53e, 04:01:02e,<br>04:01:03e, 04:01:04:01e, 04:01:04:02e,<br>04:01:05e, 04:01:06e, 04:01:07e, 04:01:08e,<br>04:01:09e, 04:01:10e, 04:01:11e, 04:01:12e,<br>04:01:13e, 04:01:14e, 04:01:15e, 04:01:16e,<br>04:01:17e, 04:01:18e, 04:01:19e, 04:01:20e,<br>04:01:21e, 04:01:22e, 04:01:23e, 04:01:24e,<br>04:01:25e, 04:01:26e, 04:01:27e, 04:01:28e,<br>04:01:29e, 04:01:30e, 04:01:31e, 04:01:32e,<br>04:01:33e, 04:01:34e, 04:01:35e, 04:01:36e,<br>04:01:37:01e, 04:01:37:02e, 04:01:38e,<br>04:01:39:01e, 04:01:39:02e, 04:01:40e,<br>04:01:41e, 04:01:42e, 04:01:43e, 04:01:44e,<br>04:01:45e, 04:01:46e, 04:01:47e, 04:01:48e,<br>04:01:49e, 04:01:50e / DPB1* 213:01:01e,<br>213:01:02e / DPB1* 334:01:01e, 334:01:02e /<br>DPB1* 350:01e / DPB1* 415:01e / DPB1*<br>459:01e / DPB1* 464:01e / DPB1*<br>523:01:01e, 523:01:02e / DPB1* 534:01e /<br>DPB1* 615:01e / DPB1* 618:01e / DPB1*<br>670:01e / DPB1* 677:01e / DPB1* 699:01e /<br>DPB1* 755:01e / DPB1* 757:01e / DPB1*<br>765:01e / DPB1* 767:01e / DPB1* 784:01e /<br>DPB1* 804:01e / DPB1* 806:01:01:01e,<br>806:01:01:02e / DPB1* 813:01e / DPB1*<br>820:01e / DPB1* 824:01:01e, 824:01:02e /<br>DPB1* 826:01e / DPB1* 850:01e / DPB1*<br>859:01e / DPB1* 880:01e / DPB1* 882:01e /<br>DPB1* 926:01e / DPB1* 932:01e / DPB1*<br>939:01e / DPB1* 978:01e / DPB1* 988:01e / | 04:01P<br>213:01P<br>334:01P<br>523:01P | LFQG  | EEFA  | AAE   | ILEEK | M     | GGPM  |

DPB1\* 989:01e / DPB1\* 992:01e / DPB1\*  
997:01e / DPB1\* 1001:01e / DPB1\*  
1002:01e / DPB1\* 1003:01e / DPB1\*  
1004:01e / DPB1\* 1010:01e / DPB1\*  
1011:01e / DPB1\* 1023:01e / DPB1\*  
1033:01e / DPB1\* 1074:01e / DPB1\*  
1086:01e / DPB1\* 1091:01e / DPB1\*  
1100:01e / DPB1\* 1129:01e / DPB1\*  
1132:01e / DPB1\* 1146:01e / DPB1\*  
1148:01e / DPB1\* 1152:01e / DPB1\*  
1155:01e / DPB1\* 1161:01e / DPB1\*  
1164:01e

DPB1\* 04:01:01:24Ne / DPB1\* 99:01e /  
DPB1\* 120:01Ne / DPB1\* 121:01e / DPB1\*  
128:01e / DPB1\* 134:01e / DPB1\* 149:01e /  
DPB1\* 169:01e / DPB1\* 174:01e / DPB1\*  
175:01e / DPB1\* 180:01e / DPB1\* 181:01e /  
DPB1\* 192:01e / DPB1\* 193:01e / DPB1\*  
194:01e / DPB1\* 195:01e / DPB1\* 212:01e /  
DPB1\* 224:01e / DPB1\* 225:01e / DPB1\*  
228:01e / DPB1\* 231:01e / DPB1\* 232:01e /  
DPB1\* 240:01e / DPB1\* 253:01e / DPB1\*  
255:01e / DPB1\* 262:01e / DPB1\* 272:01e /  
DPB1\* 275:01e / DPB1\* 276:01e / DPB1\*  
281:01e / DPB1\* 282:01e / DPB1\* 283:01e /  
DPB1\* 298:01e / DPB1\* 320:01e / DPB1\*  
323:01e / DPB1\* 335:01e / DPB1\* 336:01e /  
DPB1\* 341:01e / DPB1\* 356:01e / DPB1\*  
360:01e / DPB1\* 372:01e / DPB1\* 376:01e /  
DPB1\* 378:01e / DPB1\* 396:01e / DPB1\*  
397:01e / DPB1\* 418:01e / DPB1\* 425:01e /  
DPB1\* 426:01e / DPB1\* 428:01e / DPB1\*  
434:01e / DPB1\* 453:01e / DPB1\* 455:01Ne /  
DPB1\* 465:01e / DPB1\* 468:01e / DPB1\*  
475:01e / DPB1\* 476:01e / DPB1\* 479:01e /  
DPB1\* 485:01e / DPB1\* 486:01e / DPB1\*  
487:01e / DPB1\* 497:01e / DPB1\* 500:01e /  
DPB1\* 520:01e / DPB1\* 521:01e / DPB1\*  
522:01e / DPB1\* 524:01e / DPB1\* 529:01e /  
DPB1\* 553:01e / DPB1\* 554:01e / DPB1\*  
556:01e / DPB1\* 559:01e / DPB1\* 569:01e /  
DPB1\* 575:01e / DPB1\* 578:01e / DPB1\*  
583:01e / DPB1\* 591:01e / DPB1\* 593:01e /  
DPB1\* 607:01e / DPB1\* 614:01e / DPB1\*  
625:01e / DPB1\* 643:01e / DPB1\* 658:01e /  
DPB1\* 666:01e / DPB1\* 682:01e / DPB1\*  
683:01e / DPB1\* 694:01e / DPB1\* 722:01e /  
DPB1\* 739:01e / DPB1\* 742:01e / DPB1\*  
750:01e / DPB1\* 754:01Ne / DPB1\*  
756:01Ne / DPB1\* 758:01e / DPB1\* 761:01e /  
DPB1\* 769:01e / DPB1\* 772:01e / DPB1\*  
773:01e / DPB1\* 788:01e / DPB1\* 795:01e /  
DPB1\* 803:01e / DPB1\* 808:01e / DPB1\*  
811:01e / DPB1\* 812:01e / DPB1\* 814:01e /  
DPB1\* 837:01e / DPB1\* 842:01e / DPB1\*  
852:01e / DPB1\* 878:01Ne / DPB1\* 895:01e /  
DPB1\* 915:01e / DPB1\* 957:01e / DPB1\*  
966:01e / DPB1\* 974:01Ne / DPB1\* 993:01e /  
DPB1\* 1040:01e / DPB1\* 1042:01e / DPB1\*  
1048:01e / DPB1\* 1060:01e / DPB1\*  
1062:01e / DPB1\* 1064:01e / DPB1\*  
1066:01e / DPB1\* 1108:01e / DPB1\*  
1112:01Ne / DPB1\* 1113:01e / DPB1\*  
1121:01Ne / DPB1\* 1139:01e / DPB1\*  
1167:01e

-

|                                                                                               |                              |         |      |      |     |       |   |             |
|-----------------------------------------------------------------------------------------------|------------------------------|---------|------|------|-----|-------|---|-------------|
| <b>EDP279</b>                                                                                 | DPB1* 279:01:01e, 279:01:02e | 279:01P | LFQG | EEFA | AAE | ILEEK | M | <b>GRPM</b> |
| 2 rare                                                                                        |                              |         |      |      |     |       |   |             |
| <i>One side of this epitope requires a RARE allele, review results to confirm assignment.</i> |                              |         |      |      |     |       |   |             |

OR

| EPITYPE                                  | ALLELES                                                                                                                                                                                                                                                                                                                                                                                                                                                                                                                                                                                                                                                                                                                                                                                                                                                                                                                                                                                                                                                                                                                                                                                                                                                                                                                                                                                                                                                                                                                                                                                                                                                                                                                                                                                                                                                                                                                                                                                                                                                                                                                                                                                                                                                                                                                                                                                                                              | P GROUP                                 | HVR-A | HVR-B | HVR-C | HVR-D | HVR-E | HVR-F |
|------------------------------------------|--------------------------------------------------------------------------------------------------------------------------------------------------------------------------------------------------------------------------------------------------------------------------------------------------------------------------------------------------------------------------------------------------------------------------------------------------------------------------------------------------------------------------------------------------------------------------------------------------------------------------------------------------------------------------------------------------------------------------------------------------------------------------------------------------------------------------------------------------------------------------------------------------------------------------------------------------------------------------------------------------------------------------------------------------------------------------------------------------------------------------------------------------------------------------------------------------------------------------------------------------------------------------------------------------------------------------------------------------------------------------------------------------------------------------------------------------------------------------------------------------------------------------------------------------------------------------------------------------------------------------------------------------------------------------------------------------------------------------------------------------------------------------------------------------------------------------------------------------------------------------------------------------------------------------------------------------------------------------------------------------------------------------------------------------------------------------------------------------------------------------------------------------------------------------------------------------------------------------------------------------------------------------------------------------------------------------------------------------------------------------------------------------------------------------------------|-----------------------------------------|-------|-------|-------|-------|-------|-------|
| <b>EDP04</b><br><br>1 common<br>291 rare | <b>DPB1* 04:01:01:01</b> , 04:01:01:02e,<br>04:01:01:03e, 04:01:01:04e, 04:01:01:05e,<br>04:01:01:06e, 04:01:01:07e, 04:01:01:08e,<br>04:01:01:09e, 04:01:01:10e, 04:01:01:11e,<br>04:01:01:12e, 04:01:01:13e, 04:01:01:14e,<br>04:01:01:15e, 04:01:01:16e, 04:01:01:17e,<br>04:01:01:18e, 04:01:01:19e, 04:01:01:20e,<br>04:01:01:21e, 04:01:01:22e, 04:01:01:23e,<br>04:01:01:25e, 04:01:01:26e, 04:01:01:27e,<br>04:01:01:28e, 04:01:01:29e, 04:01:01:30e,<br>04:01:01:31e, 04:01:01:32e, 04:01:01:33e,<br>04:01:01:34e, 04:01:01:35e, 04:01:01:36e,<br>04:01:01:37e, 04:01:01:38e, 04:01:01:39e,<br>04:01:01:40e, 04:01:01:41e, 04:01:01:42e,<br>04:01:01:43e, 04:01:01:44e, 04:01:01:45e,<br>04:01:01:46e, 04:01:01:47e, 04:01:01:48e,<br>04:01:01:49e, 04:01:01:50e, 04:01:01:51e,<br>04:01:01:52e, 04:01:01:53e, 04:01:02e,<br>04:01:03e, 04:01:04:01e, 04:01:04:02e,<br>04:01:05e, 04:01:06e, 04:01:07e, 04:01:08e,<br>04:01:09e, 04:01:10e, 04:01:11e, 04:01:12e,<br>04:01:13e, 04:01:14e, 04:01:15e, 04:01:16e,<br>04:01:17e, 04:01:18e, 04:01:19e, 04:01:20e,<br>04:01:21e, 04:01:22e, 04:01:23e, 04:01:24e,<br>04:01:25e, 04:01:26e, 04:01:27e, 04:01:28e,<br>04:01:29e, 04:01:30e, 04:01:31e, 04:01:32e,<br>04:01:33e, 04:01:34e, 04:01:35e, 04:01:36e,<br>04:01:37:01e, 04:01:37:02e, 04:01:38e,<br>04:01:39:01e, 04:01:39:02e, 04:01:40e,<br>04:01:41e, 04:01:42e, 04:01:43e, 04:01:44e,<br>04:01:45e, 04:01:46e, 04:01:47e, 04:01:48e,<br>04:01:49e, 04:01:50e / DPB1* 213:01:01e,<br>213:01:02e / DPB1* 334:01:01e, 334:01:02e /<br>DPB1* 350:01e / DPB1* 415:01e / DPB1*<br>459:01e / DPB1* 464:01e / DPB1*<br>523:01:01e, 523:01:02e / DPB1* 534:01e /<br>DPB1* 615:01e / DPB1* 618:01e / DPB1*<br>670:01e / DPB1* 677:01e / DPB1* 699:01e /<br>DPB1* 755:01e / DPB1* 757:01e / DPB1*<br>765:01e / DPB1* 767:01e / DPB1* 784:01e /<br>DPB1* 804:01e / DPB1* 806:01:01:01e,<br>806:01:01:02e / DPB1* 813:01e / DPB1*<br>820:01e / DPB1* 824:01:01e, 824:01:02e /<br>DPB1* 826:01e / DPB1* 850:01e / DPB1*<br>859:01e / DPB1* 880:01e / DPB1* 882:01e /<br>DPB1* 926:01e / DPB1* 932:01e / DPB1*<br>939:01e / DPB1* 978:01e / DPB1* 988:01e /<br>DPB1* 989:01e / DPB1* 992:01e / DPB1*<br>997:01e / DPB1* 1001:01e / DPB1*<br>1002:01e / DPB1* 1003:01e / DPB1*<br>1004:01e / DPB1* 1010:01e / DPB1*<br>1011:01e / DPB1* 1023:01e / DPB1*<br>1033:01e / DPB1* 1074:01e / DPB1*<br>1086:01e / DPB1* 1091:01e / DPB1* | 04:01P<br>213:01P<br>334:01P<br>523:01P | LFQG  | EEFA  | AAE   | ILEEK | M     | GGPM  |

1100:01e / DPB1\* 1129:01e / DPB1\*  
 1132:01e / DPB1\* 1146:01e / DPB1\*  
 1148:01e / DPB1\* 1152:01e / DPB1\*  
 1155:01e / DPB1\* 1161:01e / DPB1\*  
 1164:01e

DPB1\* 04:01:01:24Ne / DPB1\* 99:01e /  
 DPB1\* 120:01Ne / DPB1\* 121:01e / DPB1\*  
 128:01e / DPB1\* 134:01e / DPB1\* 149:01e /  
 DPB1\* 169:01e / DPB1\* 174:01e / DPB1\*  
 175:01e / DPB1\* 180:01e / DPB1\* 181:01e /  
 DPB1\* 192:01e / DPB1\* 193:01e / DPB1\*  
 194:01e / DPB1\* 195:01e / DPB1\* 212:01e /  
 DPB1\* 224:01e / DPB1\* 225:01e / DPB1\*  
 228:01e / DPB1\* 231:01e / DPB1\* 232:01e /  
 DPB1\* 240:01e / DPB1\* 253:01e / DPB1\*  
 255:01e / DPB1\* 262:01e / DPB1\* 272:01e /  
 DPB1\* 275:01e / DPB1\* 276:01e / DPB1\*  
 281:01e / DPB1\* 282:01e / DPB1\* 283:01e /  
 DPB1\* 298:01e / DPB1\* 320:01e / DPB1\*  
 323:01e / DPB1\* 335:01e / DPB1\* 336:01e /  
 DPB1\* 341:01e / DPB1\* 356:01e / DPB1\*  
 360:01e / DPB1\* 372:01e / DPB1\* 376:01e /  
 DPB1\* 378:01e / DPB1\* 396:01e / DPB1\*  
 397:01e / DPB1\* 418:01e / DPB1\* 425:01e /  
 DPB1\* 426:01e / DPB1\* 428:01e / DPB1\*  
 434:01e / DPB1\* 453:01e / DPB1\* 455:01Ne /  
 DPB1\* 465:01e / DPB1\* 468:01e / DPB1\*  
 475:01e / DPB1\* 476:01e / DPB1\* 479:01e /  
 DPB1\* 485:01e / DPB1\* 486:01e / DPB1\*  
 487:01e / DPB1\* 497:01e / DPB1\* 500:01e /  
 DPB1\* 520:01e / DPB1\* 521:01e / DPB1\*  
 522:01e / DPB1\* 524:01e / DPB1\* 529:01e /  
 DPB1\* 553:01e / DPB1\* 554:01e / DPB1\*  
 556:01e / DPB1\* 559:01e / DPB1\* 569:01e /  
 DPB1\* 575:01e / DPB1\* 578:01e / DPB1\*  
 583:01e / DPB1\* 591:01e / DPB1\* 593:01e /  
 DPB1\* 607:01e / DPB1\* 614:01e / DPB1\*  
 625:01e / DPB1\* 643:01e / DPB1\* 658:01e /  
 DPB1\* 666:01e / DPB1\* 682:01e / DPB1\*  
 683:01e / DPB1\* 694:01e / DPB1\* 722:01e /  
 DPB1\* 739:01e / DPB1\* 742:01e / DPB1\*  
 750:01e / DPB1\* 754:01Ne / DPB1\*  
 756:01Ne / DPB1\* 758:01e / DPB1\* 761:01e /  
 DPB1\* 769:01e / DPB1\* 772:01e / DPB1\*  
 773:01e / DPB1\* 788:01e / DPB1\* 795:01e /  
 DPB1\* 803:01e / DPB1\* 808:01e / DPB1\*  
 811:01e / DPB1\* 812:01e / DPB1\* 814:01e /  
 DPB1\* 837:01e / DPB1\* 842:01e / DPB1\*  
 852:01e / DPB1\* 878:01Ne / DPB1\* 895:01e /  
 DPB1\* 915:01e / DPB1\* 957:01e / DPB1\*  
 966:01e / DPB1\* 974:01Ne / DPB1\* 993:01e /  
 DPB1\* 1040:01e / DPB1\* 1042:01e / DPB1\*  
 1048:01e / DPB1\* 1060:01e / DPB1\*  
 1062:01e / DPB1\* 1064:01e / DPB1\*  
 1066:01e / DPB1\* 1108:01e / DPB1\*  
 1112:01Ne / DPB1\* 1113:01e / DPB1\*  
 1121:01Ne / DPB1\* 1139:01e / DPB1\*  
 1167:01e

-

**EDP679**

DPB1\* 679:01e

-

PFQG

EEFA

AAE

ILEEK

M

GGPM

1 rare

*One side of this epitope requires a RARE allele, review results to confirm assignment.*



OR

| EPITYPE                       | ALLELES                                                                                                                                                                                                                                                                                                                                                                                                                                                                                                                                                                                                                                                                                                                                                                                                                                                                                                                                                                                                                                                                                                                                                                                                                                                                                                                                                                                                                                                                                                                                                                                                                                                                                                                                                                                                                                                                                                                                                                                                                                                                                                                                                                                                                                                                                                                                                                                                                                                                                                                                                                                               | P GROUP                                 | HVR-A | HVR-B | HVR-C | HVR-D | HVR-E | HVR-F |
|-------------------------------|-------------------------------------------------------------------------------------------------------------------------------------------------------------------------------------------------------------------------------------------------------------------------------------------------------------------------------------------------------------------------------------------------------------------------------------------------------------------------------------------------------------------------------------------------------------------------------------------------------------------------------------------------------------------------------------------------------------------------------------------------------------------------------------------------------------------------------------------------------------------------------------------------------------------------------------------------------------------------------------------------------------------------------------------------------------------------------------------------------------------------------------------------------------------------------------------------------------------------------------------------------------------------------------------------------------------------------------------------------------------------------------------------------------------------------------------------------------------------------------------------------------------------------------------------------------------------------------------------------------------------------------------------------------------------------------------------------------------------------------------------------------------------------------------------------------------------------------------------------------------------------------------------------------------------------------------------------------------------------------------------------------------------------------------------------------------------------------------------------------------------------------------------------------------------------------------------------------------------------------------------------------------------------------------------------------------------------------------------------------------------------------------------------------------------------------------------------------------------------------------------------------------------------------------------------------------------------------------------------|-----------------------------------------|-------|-------|-------|-------|-------|-------|
| EDP04<br>1 common<br>291 rare | <b>DPB1* 04:01:01:01</b> , 04:01:01:02e,<br>04:01:01:03e, 04:01:01:04e, 04:01:01:05e,<br>04:01:01:06e, 04:01:01:07e, 04:01:01:08e,<br>04:01:01:09e, 04:01:01:10e, 04:01:01:11e,<br>04:01:01:12e, 04:01:01:13e, 04:01:01:14e,<br>04:01:01:15e, 04:01:01:16e, 04:01:01:17e,<br>04:01:01:18e, 04:01:01:19e, 04:01:01:20e,<br>04:01:01:21e, 04:01:01:22e, 04:01:01:23e,<br>04:01:01:25e, 04:01:01:26e, 04:01:01:27e,<br>04:01:01:28e, 04:01:01:29e, 04:01:01:30e,<br>04:01:01:31e, 04:01:01:32e, 04:01:01:33e,<br>04:01:01:34e, 04:01:01:35e, 04:01:01:36e,<br>04:01:01:37e, 04:01:01:38e, 04:01:01:39e,<br>04:01:01:40e, 04:01:01:41e, 04:01:01:42e,<br>04:01:01:43e, 04:01:01:44e, 04:01:01:45e,<br>04:01:01:46e, 04:01:01:47e, 04:01:01:48e,<br>04:01:01:49e, 04:01:01:50e, 04:01:01:51e,<br>04:01:01:52e, 04:01:01:53e, 04:01:02e,<br>04:01:03e, 04:01:04:01e, 04:01:04:02e,<br>04:01:05e, 04:01:06e, 04:01:07e, 04:01:08e,<br>04:01:09e, 04:01:10e, 04:01:11e, 04:01:12e,<br>04:01:13e, 04:01:14e, 04:01:15e, 04:01:16e,<br>04:01:17e, 04:01:18e, 04:01:19e, 04:01:20e,<br>04:01:21e, 04:01:22e, 04:01:23e, 04:01:24e,<br>04:01:25e, 04:01:26e, 04:01:27e, 04:01:28e,<br>04:01:29e, 04:01:30e, 04:01:31e, 04:01:32e,<br>04:01:33e, 04:01:34e, 04:01:35e, 04:01:36e,<br>04:01:37:01e, 04:01:37:02e, 04:01:38e,<br>04:01:39:01e, 04:01:39:02e, 04:01:40e,<br>04:01:41e, 04:01:42e, 04:01:43e, 04:01:44e,<br>04:01:45e, 04:01:46e, 04:01:47e, 04:01:48e,<br>04:01:49e, 04:01:50e / DPB1* 213:01:01e,<br>213:01:02e / DPB1* 334:01:01e, 334:01:02e /<br>DPB1* 350:01e / DPB1* 415:01e / DPB1*<br>459:01e / DPB1* 464:01e / DPB1*<br>523:01:01e, 523:01:02e / DPB1* 534:01e /<br>DPB1* 615:01e / DPB1* 618:01e / DPB1*<br>670:01e / DPB1* 677:01e / DPB1* 699:01e /<br>DPB1* 755:01e / DPB1* 757:01e / DPB1*<br>765:01e / DPB1* 767:01e / DPB1* 784:01e /<br>DPB1* 804:01e / DPB1* 806:01:01:01e,<br>806:01:01:02e / DPB1* 813:01e / DPB1*<br>820:01e / DPB1* 824:01:01e, 824:01:02e /<br>DPB1* 826:01e / DPB1* 850:01e / DPB1*<br>859:01e / DPB1* 880:01e / DPB1* 882:01e /<br>DPB1* 926:01e / DPB1* 932:01e / DPB1*<br>939:01e / DPB1* 978:01e / DPB1* 988:01e /<br>DPB1* 989:01e / DPB1* 992:01e / DPB1*<br>997:01e / DPB1* 1001:01e / DPB1*<br>1002:01e / DPB1* 1003:01e / DPB1*<br>1004:01e / DPB1* 1010:01e / DPB1*<br>1011:01e / DPB1* 1023:01e / DPB1*<br>1033:01e / DPB1* 1074:01e / DPB1*<br>1086:01e / DPB1* 1091:01e / DPB1*<br>1100:01e / DPB1* 1129:01e / DPB1*<br>1132:01e / DPB1* 1146:01e / DPB1*<br>1148:01Qe / DPB1* 1152:01e / DPB1*<br>1155:01e / DPB1* 1161:01e / DPB1*<br>1164:01e | 04:01P<br>213:01P<br>334:01P<br>523:01P | LFQG  | EEFA  | AAE   | ILEEK | M     | GGPM  |

DPB1\* 04:01:01:24Ne / DPB1\* 99:01e /  
 DPB1\* 120:01Ne / DPB1\* 121:01e / DPB1\*  
 128:01e / DPB1\* 134:01e / DPB1\* 149:01e /  
 DPB1\* 169:01e / DPB1\* 174:01e / DPB1\*  
 175:01e / DPB1\* 180:01e / DPB1\* 181:01e /  
 DPB1\* 192:01e / DPB1\* 193:01e / DPB1\*  
 194:01e / DPB1\* 195:01e / DPB1\* 212:01e /  
 DPB1\* 224:01e / DPB1\* 225:01e / DPB1\*  
 228:01e / DPB1\* 231:01e / DPB1\* 232:01e /  
 DPB1\* 240:01e / DPB1\* 253:01e / DPB1\*  
 255:01e / DPB1\* 262:01e / DPB1\* 272:01e /  
 DPB1\* 275:01e / DPB1\* 276:01e / DPB1\*  
 281:01e / DPB1\* 282:01e / DPB1\* 283:01e /  
 DPB1\* 298:01e / DPB1\* 320:01e / DPB1\*  
 323:01e / DPB1\* 335:01e / DPB1\* 336:01e /  
 DPB1\* 341:01e / DPB1\* 356:01e / DPB1\*  
 360:01e / DPB1\* 372:01e / DPB1\* 376:01e /  
 DPB1\* 378:01e / DPB1\* 396:01e / DPB1\*  
 397:01e / DPB1\* 418:01e / DPB1\* 425:01e /  
 DPB1\* 426:01e / DPB1\* 428:01e / DPB1\*  
 434:01e / DPB1\* 453:01e / DPB1\* 455:01Ne /  
 DPB1\* 465:01e / DPB1\* 468:01e / DPB1\*  
 475:01e / DPB1\* 476:01e / DPB1\* 479:01e /  
 DPB1\* 485:01e / DPB1\* 486:01e / DPB1\*  
 487:01e / DPB1\* 497:01e / DPB1\* 500:01e /  
 DPB1\* 520:01e / DPB1\* 521:01e / DPB1\*  
 522:01e / DPB1\* 524:01e / DPB1\* 529:01e /  
 DPB1\* 553:01e / DPB1\* 554:01e / DPB1\*  
 556:01e / DPB1\* 559:01e / DPB1\* 569:01e /  
 DPB1\* 575:01e / DPB1\* 578:01e / DPB1\*  
 583:01e / DPB1\* 591:01e / DPB1\* 593:01e /  
 DPB1\* 607:01e / DPB1\* 614:01e / DPB1\*  
 625:01e / DPB1\* 643:01e / DPB1\* 658:01e /  
 DPB1\* 666:01e / DPB1\* 682:01e / DPB1\*  
 683:01e / DPB1\* 694:01e / DPB1\* 722:01e /  
 DPB1\* 739:01e / DPB1\* 742:01e / DPB1\*  
 750:01e / DPB1\* 754:01Ne / DPB1\*  
 756:01Ne / DPB1\* 758:01e / DPB1\* 761:01e /  
 DPB1\* 769:01e / DPB1\* 772:01e / DPB1\*  
 773:01e / DPB1\* 788:01e / DPB1\* 795:01e /  
 DPB1\* 803:01e / DPB1\* 808:01e / DPB1\*  
 811:01e / DPB1\* 812:01e / DPB1\* 814:01e /  
 DPB1\* 837:01e / DPB1\* 842:01e / DPB1\*  
 852:01e / DPB1\* 878:01Ne / DPB1\* 895:01e /  
 DPB1\* 915:01e / DPB1\* 957:01e / DPB1\*  
 966:01e / DPB1\* 974:01Ne / DPB1\* 993:01e /  
 DPB1\* 1040:01e / DPB1\* 1042:01e / DPB1\*  
 1048:01e / DPB1\* 1060:01e / DPB1\*  
 1062:01e / DPB1\* 1064:01e / DPB1\*  
 1066:01e / DPB1\* 1108:01e / DPB1\*  
 1112:01Ne / DPB1\* 1113:01e / DPB1\*  
 1121:01Ne / DPB1\* 1139:01e / DPB1\*  
 1167:01e

-

**EDP592**

DPB1\* 592:01e

-

LFQG

EEFA

AAE

ILEEK

M

GGPR

1 rare

*One side of this epitope requires a RARE allele, review results to confirm assignment.*

OR

| EPITYPE | ALLELES | P GROUP | HVR-A | HVR-B | HVR-C | HVR-D | HVR-E | HVR-F |
|---------|---------|---------|-------|-------|-------|-------|-------|-------|
|---------|---------|---------|-------|-------|-------|-------|-------|-------|

|                                                  |                                                                                                                                                                                                                                                                                                                                                                                                                                                                                                                                                                                                                                                                                                                                                                                                                                                                                                                                                                                                                                                                                                                                                                                                                                                                                                                                                                                                                                                                                                                                                                                                                                                                                                                                                                                                                                                                                                                                                                                                                                                                                                                                                                                                                                                                                                                                                                                                                                                                                                                                                                                                                                                                                                                                                                                                                                                                                                                                              |                                                            |             |             |            |              |          |             |
|--------------------------------------------------|----------------------------------------------------------------------------------------------------------------------------------------------------------------------------------------------------------------------------------------------------------------------------------------------------------------------------------------------------------------------------------------------------------------------------------------------------------------------------------------------------------------------------------------------------------------------------------------------------------------------------------------------------------------------------------------------------------------------------------------------------------------------------------------------------------------------------------------------------------------------------------------------------------------------------------------------------------------------------------------------------------------------------------------------------------------------------------------------------------------------------------------------------------------------------------------------------------------------------------------------------------------------------------------------------------------------------------------------------------------------------------------------------------------------------------------------------------------------------------------------------------------------------------------------------------------------------------------------------------------------------------------------------------------------------------------------------------------------------------------------------------------------------------------------------------------------------------------------------------------------------------------------------------------------------------------------------------------------------------------------------------------------------------------------------------------------------------------------------------------------------------------------------------------------------------------------------------------------------------------------------------------------------------------------------------------------------------------------------------------------------------------------------------------------------------------------------------------------------------------------------------------------------------------------------------------------------------------------------------------------------------------------------------------------------------------------------------------------------------------------------------------------------------------------------------------------------------------------------------------------------------------------------------------------------------------------|------------------------------------------------------------|-------------|-------------|------------|--------------|----------|-------------|
| <p><b>EDP04</b></p> <p>1 common<br/>291 rare</p> | <p><b>DPB1* 04:01:01:01</b>, 04:01:01:02e,<br/>04:01:01:03e, 04:01:01:04e, 04:01:01:05e,<br/>04:01:01:06e, 04:01:01:07e, 04:01:01:08e,<br/>04:01:01:09e, 04:01:01:10e, 04:01:01:11e,<br/>04:01:01:12e, 04:01:01:13e, 04:01:01:14e,<br/>04:01:01:15e, 04:01:01:16e, 04:01:01:17e,<br/>04:01:01:18e, 04:01:01:19e, 04:01:01:20e,<br/>04:01:01:21e, 04:01:01:22e, 04:01:01:23e,<br/>04:01:01:25e, 04:01:01:26e, 04:01:01:27e,<br/>04:01:01:28e, 04:01:01:29e, 04:01:01:30e,<br/>04:01:01:31e, 04:01:01:32e, 04:01:01:33e,<br/>04:01:01:34e, 04:01:01:35e, 04:01:01:36e,<br/>04:01:01:37e, 04:01:01:38e, 04:01:01:39e,<br/>04:01:01:40e, 04:01:01:41e, 04:01:01:42e,<br/>04:01:01:43e, 04:01:01:44e, 04:01:01:45e,<br/>04:01:01:46e, 04:01:01:47e, 04:01:01:48e,<br/>04:01:01:49e, 04:01:01:50e, 04:01:01:51e,<br/>04:01:01:52e, 04:01:01:53e, 04:01:02e,<br/>04:01:03e, 04:01:04:01e, 04:01:04:02e,<br/>04:01:05e, 04:01:06e, 04:01:07e, 04:01:08e,<br/>04:01:09e, 04:01:10e, 04:01:11e, 04:01:12e,<br/>04:01:13e, 04:01:14e, 04:01:15e, 04:01:16e,<br/>04:01:17e, 04:01:18e, 04:01:19e, 04:01:20e,<br/>04:01:21e, 04:01:22e, 04:01:23e, 04:01:24e,<br/>04:01:25e, 04:01:26e, 04:01:27e, 04:01:28e,<br/>04:01:29e, 04:01:30e, 04:01:31e, 04:01:32e,<br/>04:01:33e, 04:01:34e, 04:01:35e, 04:01:36e,<br/>04:01:37:01e, 04:01:37:02e, 04:01:38e,<br/>04:01:39:01e, 04:01:39:02e, 04:01:40e,<br/>04:01:41e, 04:01:42e, 04:01:43e, 04:01:44e,<br/>04:01:45e, 04:01:46e, 04:01:47e, 04:01:48e,<br/>04:01:49e, 04:01:50e / DPB1* 213:01:01e,<br/>213:01:02e / DPB1* 334:01:01e, 334:01:02e /<br/>DPB1* 350:01e / DPB1* 415:01e / DPB1*<br/>459:01e / DPB1* 464:01e / DPB1*<br/>523:01:01e, 523:01:02e / DPB1* 534:01e /<br/>DPB1* 615:01e / DPB1* 618:01e / DPB1*<br/>670:01e / DPB1* 677:01e / DPB1* 699:01e /<br/>DPB1* 755:01e / DPB1* 757:01e / DPB1*<br/>765:01e / DPB1* 767:01e / DPB1* 784:01e /<br/>DPB1* 804:01e / DPB1* 806:01:01:01e,<br/>806:01:01:02e / DPB1* 813:01e / DPB1*<br/>820:01e / DPB1* 824:01:01e, 824:01:02e /<br/>DPB1* 826:01e / DPB1* 850:01e / DPB1*<br/>859:01e / DPB1* 880:01e / DPB1* 882:01e /<br/>DPB1* 926:01e / DPB1* 932:01e / DPB1*<br/>939:01e / DPB1* 978:01e / DPB1* 988:01e /<br/>DPB1* 989:01e / DPB1* 992:01e / DPB1*<br/>997:01e / DPB1* 1001:01e / DPB1*<br/>1002:01e / DPB1* 1003:01e / DPB1*<br/>1004:01e / DPB1* 1010:01e / DPB1*<br/>1011:01e / DPB1* 1023:01e / DPB1*<br/>1033:01e / DPB1* 1074:01e / DPB1*<br/>1086:01e / DPB1* 1091:01e / DPB1*<br/>1100:01e / DPB1* 1129:01e / DPB1*<br/>1132:01e / DPB1* 1146:01e / DPB1*<br/>1148:01Qe / DPB1* 1152:01e / DPB1*<br/>1155:01e / DPB1* 1161:01e / DPB1*<br/>1164:01e</p> <p>DPB1* 04:01:01:24Ne / DPB1* 99:01e /<br/>DPB1* 120:01Ne / DPB1* 121:01e / DPB1*<br/>128:01e / DPB1* 134:01e / DPB1* 149:01e /<br/>DPB1* 169:01e / DPB1* 174:01e / DPB1*<br/>175:01e / DPB1* 180:01e / DPB1* 181:01e /<br/>DPB1* 192:01e / DPB1* 193:01e / DPB1*</p> | <p>04:01P<br/>213:01P<br/>334:01P<br/>523:01P</p> <p>-</p> | <p>LFQG</p> | <p>EEFA</p> | <p>AAE</p> | <p>ILEEK</p> | <p>M</p> | <p>GGPM</p> |
|--------------------------------------------------|----------------------------------------------------------------------------------------------------------------------------------------------------------------------------------------------------------------------------------------------------------------------------------------------------------------------------------------------------------------------------------------------------------------------------------------------------------------------------------------------------------------------------------------------------------------------------------------------------------------------------------------------------------------------------------------------------------------------------------------------------------------------------------------------------------------------------------------------------------------------------------------------------------------------------------------------------------------------------------------------------------------------------------------------------------------------------------------------------------------------------------------------------------------------------------------------------------------------------------------------------------------------------------------------------------------------------------------------------------------------------------------------------------------------------------------------------------------------------------------------------------------------------------------------------------------------------------------------------------------------------------------------------------------------------------------------------------------------------------------------------------------------------------------------------------------------------------------------------------------------------------------------------------------------------------------------------------------------------------------------------------------------------------------------------------------------------------------------------------------------------------------------------------------------------------------------------------------------------------------------------------------------------------------------------------------------------------------------------------------------------------------------------------------------------------------------------------------------------------------------------------------------------------------------------------------------------------------------------------------------------------------------------------------------------------------------------------------------------------------------------------------------------------------------------------------------------------------------------------------------------------------------------------------------------------------------|------------------------------------------------------------|-------------|-------------|------------|--------------|----------|-------------|

194:01e / DPB1\* 195:01e / DPB1\* 212:01e /  
 DPB1\* 224:01e / DPB1\* 225:01e / DPB1\*  
 228:01e / DPB1\* 231:01e / DPB1\* 232:01e /  
 DPB1\* 240:01e / DPB1\* 253:01e / DPB1\*  
 255:01e / DPB1\* 262:01e / DPB1\* 272:01e /  
 DPB1\* 275:01e / DPB1\* 276:01e / DPB1\*  
 281:01e / DPB1\* 282:01e / DPB1\* 283:01e /  
 DPB1\* 298:01e / DPB1\* 320:01e / DPB1\*  
 323:01e / DPB1\* 335:01e / DPB1\* 336:01e /  
 DPB1\* 341:01e / DPB1\* 356:01e / DPB1\*  
 360:01e / DPB1\* 372:01e / DPB1\* 376:01e /  
 DPB1\* 378:01e / DPB1\* 396:01e / DPB1\*  
 397:01e / DPB1\* 418:01e / DPB1\* 425:01e /  
 DPB1\* 426:01e / DPB1\* 428:01e / DPB1\*  
 434:01e / DPB1\* 453:01e / DPB1\* 455:01Ne /  
 DPB1\* 465:01e / DPB1\* 468:01e / DPB1\*  
 475:01e / DPB1\* 476:01e / DPB1\* 479:01e /  
 DPB1\* 485:01e / DPB1\* 486:01e / DPB1\*  
 487:01e / DPB1\* 497:01e / DPB1\* 500:01e /  
 DPB1\* 520:01e / DPB1\* 521:01e / DPB1\*  
 522:01e / DPB1\* 524:01e / DPB1\* 529:01e /  
 DPB1\* 553:01e / DPB1\* 554:01e / DPB1\*  
 556:01e / DPB1\* 559:01e / DPB1\* 569:01e /  
 DPB1\* 575:01e / DPB1\* 578:01e / DPB1\*  
 583:01e / DPB1\* 591:01e / DPB1\* 593:01e /  
 DPB1\* 607:01e / DPB1\* 614:01e / DPB1\*  
 625:01e / DPB1\* 643:01e / DPB1\* 658:01e /  
 DPB1\* 666:01e / DPB1\* 682:01e / DPB1\*  
 683:01e / DPB1\* 694:01e / DPB1\* 722:01e /  
 DPB1\* 739:01e / DPB1\* 742:01e / DPB1\*  
 750:01e / DPB1\* 754:01Ne / DPB1\*  
 756:01Ne / DPB1\* 758:01e / DPB1\* 761:01e /  
 DPB1\* 769:01e / DPB1\* 772:01e / DPB1\*  
 773:01e / DPB1\* 788:01e / DPB1\* 795:01e /  
 DPB1\* 803:01e / DPB1\* 808:01e / DPB1\*  
 811:01e / DPB1\* 812:01e / DPB1\* 814:01e /  
 DPB1\* 837:01e / DPB1\* 842:01e / DPB1\*  
 852:01e / DPB1\* 878:01Ne / DPB1\* 895:01e /  
 DPB1\* 915:01e / DPB1\* 957:01e / DPB1\*  
 966:01e / DPB1\* 974:01Ne / DPB1\* 993:01e /  
 DPB1\* 1040:01e / DPB1\* 1042:01e / DPB1\*  
 1048:01e / DPB1\* 1060:01e / DPB1\*  
 1062:01e / DPB1\* 1064:01e / DPB1\*  
 1066:01e / DPB1\* 1108:01e / DPB1\*  
 1112:01Ne / DPB1\* 1113:01e / DPB1\*  
 1121:01Ne / DPB1\* 1139:01e / DPB1\*  
 1167:01e

**EDP972**

DPB1\* 972:01e

-

LFQG

GEFV

AAE

ILEEK

M

GGPM

1 rare

*One side of this epitope requires a RARE allele, review results to confirm assignment.*

OR

| EPITYPE                              | ALLELES                                                                                                                                                                                                                                                           | P GROUP                                 | HVR-A | HVR-B | HVR-C | HVR-D | HVR-E | HVR-F |
|--------------------------------------|-------------------------------------------------------------------------------------------------------------------------------------------------------------------------------------------------------------------------------------------------------------------|-----------------------------------------|-------|-------|-------|-------|-------|-------|
| <b>EDP04</b><br>1 common<br>291 rare | DPB1* 04:01:01:01, 04:01:01:02e,<br>04:01:01:03e, 04:01:01:04e, 04:01:01:05e,<br>04:01:01:06e, 04:01:01:07e, 04:01:01:08e,<br>04:01:01:09e, 04:01:01:10e, 04:01:01:11e,<br>04:01:01:12e, 04:01:01:13e, 04:01:01:14e,<br>04:01:01:15e, 04:01:01:16e, 04:01:01:17e, | 04:01P<br>213:01P<br>334:01P<br>523:01P | LFQG  | EEFA  | AAE   | ILEEK | M     | GGPM  |

04:01:01:18e, 04:01:01:19e, 04:01:01:20e,  
04:01:01:21e, 04:01:01:22e, 04:01:01:23e,  
04:01:01:25e, 04:01:01:26e, 04:01:01:27e,  
04:01:01:28e, 04:01:01:29e, 04:01:01:30e,  
04:01:01:31e, 04:01:01:32e, 04:01:01:33e,  
04:01:01:34e, 04:01:01:35e, 04:01:01:36e,  
04:01:01:37e, 04:01:01:38e, 04:01:01:39e,  
04:01:01:40e, 04:01:01:41e, 04:01:01:42e,  
04:01:01:43e, 04:01:01:44e, 04:01:01:45e,  
04:01:01:46e, 04:01:01:47e, 04:01:01:48e,  
04:01:01:49e, 04:01:01:50e, 04:01:01:51e,  
04:01:01:52e, 04:01:01:53e, 04:01:02e,  
04:01:03e, 04:01:04:01e, 04:01:04:02e,  
04:01:05e, 04:01:06e, 04:01:07e, 04:01:08e,  
04:01:09e, 04:01:10e, 04:01:11e, 04:01:12e,  
04:01:13e, 04:01:14e, 04:01:15e, 04:01:16e,  
04:01:17e, 04:01:18e, 04:01:19e, 04:01:20e,  
04:01:21e, 04:01:22e, 04:01:23e, 04:01:24e,  
04:01:25e, 04:01:26e, 04:01:27e, 04:01:28e,  
04:01:29e, 04:01:30e, 04:01:31e, 04:01:32e,  
04:01:33e, 04:01:34e, 04:01:35e, 04:01:36e,  
04:01:37:01e, 04:01:37:02e, 04:01:38e,  
04:01:39:01e, 04:01:39:02e, 04:01:40e,  
04:01:41e, 04:01:42e, 04:01:43e, 04:01:44e,  
04:01:45e, 04:01:46e, 04:01:47e, 04:01:48e,  
04:01:49e, 04:01:50e / DPB1\* 213:01:01e,  
213:01:02e / DPB1\* 334:01:01e, 334:01:02e /  
DPB1\* 350:01e / DPB1\* 415:01e / DPB1\*  
459:01e / DPB1\* 464:01e / DPB1\*  
523:01:01e, 523:01:02e / DPB1\* 534:01e /  
DPB1\* 615:01e / DPB1\* 618:01e / DPB1\*  
670:01e / DPB1\* 677:01e / DPB1\* 699:01e /  
DPB1\* 755:01e / DPB1\* 757:01e / DPB1\*  
765:01e / DPB1\* 767:01e / DPB1\* 784:01e /  
DPB1\* 804:01e / DPB1\* 806:01:01:01e,  
806:01:01:02e / DPB1\* 813:01e / DPB1\*  
820:01e / DPB1\* 824:01:01e, 824:01:02e /  
DPB1\* 826:01e / DPB1\* 850:01e / DPB1\*  
859:01e / DPB1\* 880:01e / DPB1\* 882:01e /  
DPB1\* 926:01e / DPB1\* 932:01e / DPB1\*  
939:01e / DPB1\* 978:01e / DPB1\* 988:01e /  
DPB1\* 989:01e / DPB1\* 992:01e / DPB1\*  
997:01e / DPB1\* 1001:01e / DPB1\*  
1002:01e / DPB1\* 1003:01e / DPB1\*  
1004:01e / DPB1\* 1010:01e / DPB1\*  
1011:01e / DPB1\* 1023:01e / DPB1\*  
1033:01e / DPB1\* 1074:01e / DPB1\*  
1086:01e / DPB1\* 1091:01e / DPB1\*  
1100:01e / DPB1\* 1129:01e / DPB1\*  
1132:01e / DPB1\* 1146:01e / DPB1\*  
1148:01Qe / DPB1\* 1152:01e / DPB1\*  
1155:01e / DPB1\* 1161:01e / DPB1\*  
1164:01e

DPB1\* 04:01:01:24Ne / DPB1\* 99:01e /  
DPB1\* 120:01Ne / DPB1\* 121:01e / DPB1\*  
128:01e / DPB1\* 134:01e / DPB1\* 149:01e /  
DPB1\* 169:01e / DPB1\* 174:01e / DPB1\*  
175:01e / DPB1\* 180:01e / DPB1\* 181:01e /  
DPB1\* 192:01e / DPB1\* 193:01e / DPB1\*  
194:01e / DPB1\* 195:01e / DPB1\* 212:01e /  
DPB1\* 224:01e / DPB1\* 225:01e / DPB1\*  
228:01e / DPB1\* 231:01e / DPB1\* 232:01e /  
DPB1\* 240:01e / DPB1\* 253:01e / DPB1\*  
255:01e / DPB1\* 262:01e / DPB1\* 272:01e /  
DPB1\* 275:01e / DPB1\* 276:01e / DPB1\*

-

281:01e / DPB1\* 282:01e / DPB1\* 283:01e /  
 DPB1\* 298:01e / DPB1\* 320:01e / DPB1\*  
 323:01e / DPB1\* 335:01e / DPB1\* 336:01e /  
 DPB1\* 341:01e / DPB1\* 356:01e / DPB1\*  
 360:01e / DPB1\* 372:01e / DPB1\* 376:01e /  
 DPB1\* 378:01e / DPB1\* 396:01e / DPB1\*  
 397:01e / DPB1\* 418:01e / DPB1\* 425:01e /  
 DPB1\* 426:01e / DPB1\* 428:01e / DPB1\*  
 434:01e / DPB1\* 453:01e / DPB1\* 455:01Ne /  
 DPB1\* 465:01e / DPB1\* 468:01e / DPB1\*  
 475:01e / DPB1\* 476:01e / DPB1\* 479:01e /  
 DPB1\* 485:01e / DPB1\* 486:01e / DPB1\*  
 487:01e / DPB1\* 497:01e / DPB1\* 500:01e /  
 DPB1\* 520:01e / DPB1\* 521:01e / DPB1\*  
 522:01e / DPB1\* 524:01e / DPB1\* 529:01e /  
 DPB1\* 553:01e / DPB1\* 554:01e / DPB1\*  
 556:01e / DPB1\* 559:01e / DPB1\* 569:01e /  
 DPB1\* 575:01e / DPB1\* 578:01e / DPB1\*  
 583:01e / DPB1\* 591:01e / DPB1\* 593:01e /  
 DPB1\* 607:01e / DPB1\* 614:01e / DPB1\*  
 625:01e / DPB1\* 643:01e / DPB1\* 658:01e /  
 DPB1\* 666:01e / DPB1\* 682:01e / DPB1\*  
 683:01e / DPB1\* 694:01e / DPB1\* 722:01e /  
 DPB1\* 739:01e / DPB1\* 742:01e / DPB1\*  
 750:01e / DPB1\* 754:01Ne / DPB1\*  
 756:01Ne / DPB1\* 758:01e / DPB1\* 761:01e /  
 DPB1\* 769:01e / DPB1\* 772:01e / DPB1\*  
 773:01e / DPB1\* 788:01e / DPB1\* 795:01e /  
 DPB1\* 803:01e / DPB1\* 808:01e / DPB1\*  
 811:01e / DPB1\* 812:01e / DPB1\* 814:01e /  
 DPB1\* 837:01e / DPB1\* 842:01e / DPB1\*  
 852:01e / DPB1\* 878:01Ne / DPB1\* 895:01e /  
 DPB1\* 915:01e / DPB1\* 957:01e / DPB1\*  
 966:01e / DPB1\* 974:01Ne / DPB1\* 993:01e /  
 DPB1\* 1040:01e / DPB1\* 1042:01e / DPB1\*  
 1048:01e / DPB1\* 1060:01e / DPB1\*  
 1062:01e / DPB1\* 1064:01e / DPB1\*  
 1066:01e / DPB1\* 1108:01e / DPB1\*  
 1112:01Ne / DPB1\* 1113:01e / DPB1\*  
 1121:01Ne / DPB1\* 1139:01e / DPB1\*  
 1167:01e

**EDP1135**

DPB1\* 1135:01Ne

-

LFQG

EEFA

AAE

ILGGE

D

GRAH

1 rare

*One side of this epitope requires a RARE allele, review results to confirm assignment.*

OR

| EPITYPE                              | ALLELES                                                                                                                                                                                                                                                                                                                                                                                                                                                                                                                                         | P GROUP                                 | HVR-A | HVR-B | HVR-C | HVR-D | HVR-E | HVR-F |
|--------------------------------------|-------------------------------------------------------------------------------------------------------------------------------------------------------------------------------------------------------------------------------------------------------------------------------------------------------------------------------------------------------------------------------------------------------------------------------------------------------------------------------------------------------------------------------------------------|-----------------------------------------|-------|-------|-------|-------|-------|-------|
| <b>EDP04</b><br>1 common<br>291 rare | DPB1* 04:01:01:01, 04:01:01:02e,<br>04:01:01:03e, 04:01:01:04e, 04:01:01:05e,<br>04:01:01:06e, 04:01:01:07e, 04:01:01:08e,<br>04:01:01:09e, 04:01:01:10e, 04:01:01:11e,<br>04:01:01:12e, 04:01:01:13e, 04:01:01:14e,<br>04:01:01:15e, 04:01:01:16e, 04:01:01:17e,<br>04:01:01:18e, 04:01:01:19e, 04:01:01:20e,<br>04:01:01:21e, 04:01:01:22e, 04:01:01:23e,<br>04:01:01:25e, 04:01:01:26e, 04:01:01:27e,<br>04:01:01:28e, 04:01:01:29e, 04:01:01:30e,<br>04:01:01:31e, 04:01:01:32e, 04:01:01:33e,<br>04:01:01:34e, 04:01:01:35e, 04:01:01:36e, | 04:01P<br>213:01P<br>334:01P<br>523:01P | LFQG  | EEFA  | AAE   | ILEEK | M     | GGPM  |

04:01:01:37e, 04:01:01:38e, 04:01:01:39e,  
04:01:01:40e, 04:01:01:41e, 04:01:01:42e,  
04:01:01:43e, 04:01:01:44e, 04:01:01:45e,  
04:01:01:46e, 04:01:01:47e, 04:01:01:48e,  
04:01:01:49e, 04:01:01:50e, 04:01:01:51e,  
04:01:01:52e, 04:01:01:53e, 04:01:02e,  
04:01:03e, 04:01:04:01e, 04:01:04:02e,  
04:01:05e, 04:01:06e, 04:01:07e, 04:01:08e,  
04:01:09e, 04:01:10e, 04:01:11e, 04:01:12e,  
04:01:13e, 04:01:14e, 04:01:15e, 04:01:16e,  
04:01:17e, 04:01:18e, 04:01:19e, 04:01:20e,  
04:01:21e, 04:01:22e, 04:01:23e, 04:01:24e,  
04:01:25e, 04:01:26e, 04:01:27e, 04:01:28e,  
04:01:29e, 04:01:30e, 04:01:31e, 04:01:32e,  
04:01:33e, 04:01:34e, 04:01:35e, 04:01:36e,  
04:01:37:01e, 04:01:37:02e, 04:01:38e,  
04:01:39:01e, 04:01:39:02e, 04:01:40e,  
04:01:41e, 04:01:42e, 04:01:43e, 04:01:44e,  
04:01:45e, 04:01:46e, 04:01:47e, 04:01:48e,  
04:01:49e, 04:01:50e / DPB1\* 213:01:01e,  
213:01:02e / DPB1\* 334:01:01e, 334:01:02e /  
DPB1\* 350:01e / DPB1\* 415:01e / DPB1\*  
459:01e / DPB1\* 464:01e / DPB1\*  
523:01:01e, 523:01:02e / DPB1\* 534:01e /  
DPB1\* 615:01e / DPB1\* 618:01e / DPB1\*  
670:01e / DPB1\* 677:01e / DPB1\* 699:01e /  
DPB1\* 755:01e / DPB1\* 757:01e / DPB1\*  
765:01e / DPB1\* 767:01e / DPB1\* 784:01e /  
DPB1\* 804:01e / DPB1\* 806:01:01:01e,  
806:01:01:02e / DPB1\* 813:01e / DPB1\*  
820:01e / DPB1\* 824:01:01e, 824:01:02e /  
DPB1\* 826:01e / DPB1\* 850:01e / DPB1\*  
859:01e / DPB1\* 880:01e / DPB1\* 882:01e /  
DPB1\* 926:01e / DPB1\* 932:01e / DPB1\*  
939:01e / DPB1\* 978:01e / DPB1\* 988:01e /  
DPB1\* 989:01e / DPB1\* 992:01e / DPB1\*  
997:01e / DPB1\* 1001:01e / DPB1\*  
1002:01e / DPB1\* 1003:01e / DPB1\*  
1004:01e / DPB1\* 1010:01e / DPB1\*  
1011:01e / DPB1\* 1023:01e / DPB1\*  
1033:01e / DPB1\* 1074:01e / DPB1\*  
1086:01e / DPB1\* 1091:01e / DPB1\*  
1100:01e / DPB1\* 1129:01e / DPB1\*  
1132:01e / DPB1\* 1146:01e / DPB1\*  
1148:01Qe / DPB1\* 1152:01e / DPB1\*  
1155:01e / DPB1\* 1161:01e / DPB1\*  
1164:01e

DPB1\* 04:01:01:24Ne / DPB1\* 99:01e /  
DPB1\* 120:01Ne / DPB1\* 121:01e / DPB1\*  
128:01e / DPB1\* 134:01e / DPB1\* 149:01e /  
DPB1\* 169:01e / DPB1\* 174:01e / DPB1\*  
175:01e / DPB1\* 180:01e / DPB1\* 181:01e /  
DPB1\* 192:01e / DPB1\* 193:01e / DPB1\*  
194:01e / DPB1\* 195:01e / DPB1\* 212:01e /  
DPB1\* 224:01e / DPB1\* 225:01e / DPB1\*  
228:01e / DPB1\* 231:01e / DPB1\* 232:01e /  
DPB1\* 240:01e / DPB1\* 253:01e / DPB1\*  
255:01e / DPB1\* 262:01e / DPB1\* 272:01e /  
DPB1\* 275:01e / DPB1\* 276:01e / DPB1\*  
281:01e / DPB1\* 282:01e / DPB1\* 283:01e /  
DPB1\* 298:01e / DPB1\* 320:01e / DPB1\*  
323:01e / DPB1\* 335:01e / DPB1\* 336:01e /  
DPB1\* 341:01e / DPB1\* 356:01e / DPB1\*  
360:01e / DPB1\* 372:01e / DPB1\* 376:01e /  
DPB1\* 378:01e / DPB1\* 396:01e / DPB1\*

-

397:01e / DPB1\* 418:01e / DPB1\* 425:01e /  
 DPB1\* 426:01e / DPB1\* 428:01e / DPB1\*  
 434:01e / DPB1\* 453:01e / DPB1\* 455:01Ne /  
 DPB1\* 465:01e / DPB1\* 468:01e / DPB1\*  
 475:01e / DPB1\* 476:01e / DPB1\* 479:01e /  
 DPB1\* 485:01e / DPB1\* 486:01e / DPB1\*  
 487:01e / DPB1\* 497:01e / DPB1\* 500:01e /  
 DPB1\* 520:01e / DPB1\* 521:01e / DPB1\*  
 522:01e / DPB1\* 524:01e / DPB1\* 529:01e /  
 DPB1\* 553:01e / DPB1\* 554:01e / DPB1\*  
 556:01e / DPB1\* 559:01e / DPB1\* 569:01e /  
 DPB1\* 575:01e / DPB1\* 578:01e / DPB1\*  
 583:01e / DPB1\* 591:01e / DPB1\* 593:01e /  
 DPB1\* 607:01e / DPB1\* 614:01e / DPB1\*  
 625:01e / DPB1\* 643:01e / DPB1\* 658:01e /  
 DPB1\* 666:01e / DPB1\* 682:01e / DPB1\*  
 683:01e / DPB1\* 694:01e / DPB1\* 722:01e /  
 DPB1\* 739:01e / DPB1\* 742:01e / DPB1\*  
 750:01e / DPB1\* 754:01Ne / DPB1\*  
 756:01Ne / DPB1\* 758:01e / DPB1\* 761:01e /  
 DPB1\* 769:01e / DPB1\* 772:01e / DPB1\*  
 773:01e / DPB1\* 788:01e / DPB1\* 795:01e /  
 DPB1\* 803:01e / DPB1\* 808:01e / DPB1\*  
 811:01e / DPB1\* 812:01e / DPB1\* 814:01e /  
 DPB1\* 837:01e / DPB1\* 842:01e / DPB1\*  
 852:01e / DPB1\* 878:01Ne / DPB1\* 895:01e /  
 DPB1\* 915:01e / DPB1\* 957:01e / DPB1\*  
 966:01e / DPB1\* 974:01Ne / DPB1\* 993:01e /  
 DPB1\* 1040:01e / DPB1\* 1042:01e / DPB1\*  
 1048:01e / DPB1\* 1060:01e / DPB1\*  
 1062:01e / DPB1\* 1064:01e / DPB1\*  
 1066:01e / DPB1\* 1108:01e / DPB1\*  
 1112:01Ne / DPB1\* 1113:01e / DPB1\*  
 1121:01Ne / DPB1\* 1139:01e / DPB1\*  
 1167:01e

EDP687

DPB1\* 687:01e

-

LFQL

EEFA

AAE

ILEEK

M

GGPM

1 rare

*One side of this epitope requires a RARE allele, review results to confirm assignment.*

OR

| EPITYPE                       | ALLELES                                                                                                                                                                                                                                                                                                                                                                                                                                                                                                                                                                                                                                                                                                                                                                                                                    | P GROUP                                 | HVR-A | HVR-B | HVR-C | HVR-D | HVR-E | HVR-F |
|-------------------------------|----------------------------------------------------------------------------------------------------------------------------------------------------------------------------------------------------------------------------------------------------------------------------------------------------------------------------------------------------------------------------------------------------------------------------------------------------------------------------------------------------------------------------------------------------------------------------------------------------------------------------------------------------------------------------------------------------------------------------------------------------------------------------------------------------------------------------|-----------------------------------------|-------|-------|-------|-------|-------|-------|
| EDP04<br>1 common<br>291 rare | DPB1* 04:01:01:01, 04:01:01:02e,<br>04:01:01:03e, 04:01:01:04e, 04:01:01:05e,<br>04:01:01:06e, 04:01:01:07e, 04:01:01:08e,<br>04:01:01:09e, 04:01:01:10e, 04:01:01:11e,<br>04:01:01:12e, 04:01:01:13e, 04:01:01:14e,<br>04:01:01:15e, 04:01:01:16e, 04:01:01:17e,<br>04:01:01:18e, 04:01:01:19e, 04:01:01:20e,<br>04:01:01:21e, 04:01:01:22e, 04:01:01:23e,<br>04:01:01:25e, 04:01:01:26e, 04:01:01:27e,<br>04:01:01:28e, 04:01:01:29e, 04:01:01:30e,<br>04:01:01:31e, 04:01:01:32e, 04:01:01:33e,<br>04:01:01:34e, 04:01:01:35e, 04:01:01:36e,<br>04:01:01:37e, 04:01:01:38e, 04:01:01:39e,<br>04:01:01:40e, 04:01:01:41e, 04:01:01:42e,<br>04:01:01:43e, 04:01:01:44e, 04:01:01:45e,<br>04:01:01:46e, 04:01:01:47e, 04:01:01:48e,<br>04:01:01:49e, 04:01:01:50e, 04:01:01:51e,<br>04:01:01:52e, 04:01:01:53e, 04:01:02e, | 04:01P<br>213:01P<br>334:01P<br>523:01P | LFQG  | EEFA  | AAE   | ILEEK | M     | GGPM  |



04:01:03e, 04:01:04:01e, 04:01:04:02e,  
04:01:05e, 04:01:06e, 04:01:07e, 04:01:08e,  
04:01:09e, 04:01:10e, 04:01:11e, 04:01:12e,  
04:01:13e, 04:01:14e, 04:01:15e, 04:01:16e,  
04:01:17e, 04:01:18e, 04:01:19e, 04:01:20e,  
04:01:21e, 04:01:22e, 04:01:23e, 04:01:24e,  
04:01:25e, 04:01:26e, 04:01:27e, 04:01:28e,  
04:01:29e, 04:01:30e, 04:01:31e, 04:01:32e,  
04:01:33e, 04:01:34e, 04:01:35e, 04:01:36e,  
04:01:37:01e, 04:01:37:02e, 04:01:38e,  
04:01:39:01e, 04:01:39:02e, 04:01:40e,  
04:01:41e, 04:01:42e, 04:01:43e, 04:01:44e,  
04:01:45e, 04:01:46e, 04:01:47e, 04:01:48e,  
04:01:49e, 04:01:50e / DPB1\* 213:01:01e,  
213:01:02e / DPB1\* 334:01:01e, 334:01:02e /  
DPB1\* 350:01e / DPB1\* 415:01e / DPB1\*  
459:01e / DPB1\* 464:01e / DPB1\*  
523:01:01e, 523:01:02e / DPB1\* 534:01e /  
DPB1\* 615:01e / DPB1\* 618:01e / DPB1\*  
670:01e / DPB1\* 677:01e / DPB1\* 699:01e /  
DPB1\* 755:01e / DPB1\* 757:01e / DPB1\*  
765:01e / DPB1\* 767:01e / DPB1\* 784:01e /  
DPB1\* 804:01e / DPB1\* 806:01:01:01e,  
806:01:01:02e / DPB1\* 813:01e / DPB1\*  
820:01e / DPB1\* 824:01:01e, 824:01:02e /  
DPB1\* 826:01e / DPB1\* 850:01e / DPB1\*  
859:01e / DPB1\* 880:01e / DPB1\* 882:01e /  
DPB1\* 926:01e / DPB1\* 932:01e / DPB1\*  
939:01e / DPB1\* 978:01e / DPB1\* 988:01e /  
DPB1\* 989:01e / DPB1\* 992:01e / DPB1\*  
997:01e / DPB1\* 1001:01e / DPB1\*  
1002:01e / DPB1\* 1003:01e / DPB1\*  
1004:01e / DPB1\* 1010:01e / DPB1\*  
1011:01e / DPB1\* 1023:01e / DPB1\*  
1033:01e / DPB1\* 1074:01e / DPB1\*  
1086:01e / DPB1\* 1091:01e / DPB1\*  
1100:01e / DPB1\* 1129:01e / DPB1\*  
1132:01e / DPB1\* 1146:01e / DPB1\*  
1148:01Qe / DPB1\* 1152:01e / DPB1\*  
1155:01e / DPB1\* 1161:01e / DPB1\*  
1164:01e

DPB1\* 04:01:01:24Ne / DPB1\* 99:01e /  
DPB1\* 120:01Ne / DPB1\* 121:01e / DPB1\*  
128:01e / DPB1\* 134:01e / DPB1\* 149:01e /  
DPB1\* 169:01e / DPB1\* 174:01e / DPB1\*  
175:01e / DPB1\* 180:01e / DPB1\* 181:01e /  
DPB1\* 192:01e / DPB1\* 193:01e / DPB1\*  
194:01e / DPB1\* 195:01e / DPB1\* 212:01e /  
DPB1\* 224:01e / DPB1\* 225:01e / DPB1\*  
228:01e / DPB1\* 231:01e / DPB1\* 232:01e /  
DPB1\* 240:01e / DPB1\* 253:01e / DPB1\*  
255:01e / DPB1\* 262:01e / DPB1\* 272:01e /  
DPB1\* 275:01e / DPB1\* 276:01e / DPB1\*  
281:01e / DPB1\* 282:01e / DPB1\* 283:01e /  
DPB1\* 298:01e / DPB1\* 320:01e / DPB1\*  
323:01e / DPB1\* 335:01e / DPB1\* 336:01e /  
DPB1\* 341:01e / DPB1\* 356:01e / DPB1\*  
360:01e / DPB1\* 372:01e / DPB1\* 376:01e /  
DPB1\* 378:01e / DPB1\* 396:01e / DPB1\*  
397:01e / DPB1\* 418:01e / DPB1\* 425:01e /  
DPB1\* 426:01e / DPB1\* 428:01e / DPB1\*  
434:01e / DPB1\* 453:01e / DPB1\* 455:01Ne /  
DPB1\* 465:01e / DPB1\* 468:01e / DPB1\*  
475:01e / DPB1\* 476:01e / DPB1\* 479:01e /  
DPB1\* 485:01e / DPB1\* 486:01e / DPB1\*

-

487:01e / DPB1\* 497:01e / DPB1\* 500:01e /  
 DPB1\* 520:01e / DPB1\* 521:01e / DPB1\*  
 522:01e / DPB1\* 524:01e / DPB1\* 529:01e /  
 DPB1\* 553:01e / DPB1\* 554:01e / DPB1\*  
 556:01e / DPB1\* 559:01e / DPB1\* 569:01e /  
 DPB1\* 575:01e / DPB1\* 578:01e / DPB1\*  
 583:01e / DPB1\* 591:01e / DPB1\* 593:01e /  
 DPB1\* 607:01e / DPB1\* 614:01e / DPB1\*  
 625:01e / DPB1\* 643:01e / DPB1\* 658:01e /  
 DPB1\* 666:01e / DPB1\* 682:01e / DPB1\*  
 683:01e / DPB1\* 694:01e / DPB1\* 722:01e /  
 DPB1\* 739:01e / DPB1\* 742:01e / DPB1\*  
 750:01e / DPB1\* 754:01Ne / DPB1\*  
 756:01Ne / DPB1\* 758:01e / DPB1\* 761:01e /  
 DPB1\* 769:01e / DPB1\* 772:01e / DPB1\*  
 773:01e / DPB1\* 788:01e / DPB1\* 795:01e /  
 DPB1\* 803:01e / DPB1\* 808:01e / DPB1\*  
 811:01e / DPB1\* 812:01e / DPB1\* 814:01e /  
 DPB1\* 837:01e / DPB1\* 842:01e / DPB1\*  
 852:01e / DPB1\* 878:01Ne / DPB1\* 895:01e /  
 DPB1\* 915:01e / DPB1\* 957:01e / DPB1\*  
 966:01e / DPB1\* 974:01Ne / DPB1\* 993:01e /  
 DPB1\* 1040:01e / DPB1\* 1042:01e / DPB1\*  
 1048:01e / DPB1\* 1060:01e / DPB1\*  
 1062:01e / DPB1\* 1064:01e / DPB1\*  
 1066:01e / DPB1\* 1108:01e / DPB1\*  
 1112:01Ne / DPB1\* 1113:01e / DPB1\*  
 1121:01Ne / DPB1\* 1139:01e / DPB1\*  
 1167:01e

**EDP427**

DPB1\* 427:01e

-

LFQG

EEFA

ATE

ILEEK

M

GGPM

1 rare

*One side of this epitope requires a RARE allele, review results to confirm assignment.*

OR

| EPITYPE                                  | ALLELES                                                                                                                                                                                                                                                                                                                                                                                                                                                                                                                                                                                                                                                                                                                                                                                                                                                                                                                                                                                                                                                                                                         | P GROUP                                 | HVR-A | HVR-B | HVR-C | HVR-D | HVR-E | HVR-F |
|------------------------------------------|-----------------------------------------------------------------------------------------------------------------------------------------------------------------------------------------------------------------------------------------------------------------------------------------------------------------------------------------------------------------------------------------------------------------------------------------------------------------------------------------------------------------------------------------------------------------------------------------------------------------------------------------------------------------------------------------------------------------------------------------------------------------------------------------------------------------------------------------------------------------------------------------------------------------------------------------------------------------------------------------------------------------------------------------------------------------------------------------------------------------|-----------------------------------------|-------|-------|-------|-------|-------|-------|
| <b>EDP04</b><br><br>1 common<br>291 rare | DPB1* 04:01:01:01, 04:01:01:02e,<br>04:01:01:03e, 04:01:01:04e, 04:01:01:05e,<br>04:01:01:06e, 04:01:01:07e, 04:01:01:08e,<br>04:01:01:09e, 04:01:01:10e, 04:01:01:11e,<br>04:01:01:12e, 04:01:01:13e, 04:01:01:14e,<br>04:01:01:15e, 04:01:01:16e, 04:01:01:17e,<br>04:01:01:18e, 04:01:01:19e, 04:01:01:20e,<br>04:01:01:21e, 04:01:01:22e, 04:01:01:23e,<br>04:01:01:25e, 04:01:01:26e, 04:01:01:27e,<br>04:01:01:28e, 04:01:01:29e, 04:01:01:30e,<br>04:01:01:31e, 04:01:01:32e, 04:01:01:33e,<br>04:01:01:34e, 04:01:01:35e, 04:01:01:36e,<br>04:01:01:37e, 04:01:01:38e, 04:01:01:39e,<br>04:01:01:40e, 04:01:01:41e, 04:01:01:42e,<br>04:01:01:43e, 04:01:01:44e, 04:01:01:45e,<br>04:01:01:46e, 04:01:01:47e, 04:01:01:48e,<br>04:01:01:49e, 04:01:01:50e, 04:01:01:51e,<br>04:01:01:52e, 04:01:01:53e, 04:01:02e,<br>04:01:03e, 04:01:04:01e, 04:01:04:02e,<br>04:01:05e, 04:01:06e, 04:01:07e, 04:01:08e,<br>04:01:09e, 04:01:10e, 04:01:11e, 04:01:12e,<br>04:01:13e, 04:01:14e, 04:01:15e, 04:01:16e,<br>04:01:17e, 04:01:18e, 04:01:19e, 04:01:20e,<br>04:01:21e, 04:01:22e, 04:01:23e, 04:01:24e, | 04:01P<br>213:01P<br>334:01P<br>523:01P | LFQG  | EEFA  | AAE   | ILEEK | M     | GGPM  |

04:01:25e, 04:01:26e, 04:01:27e, 04:01:28e,  
04:01:29e, 04:01:30e, 04:01:31e, 04:01:32e,  
04:01:33e, 04:01:34e, 04:01:35e, 04:01:36e,  
04:01:37:01e, 04:01:37:02e, 04:01:38e,  
04:01:39:01e, 04:01:39:02e, 04:01:40e,  
04:01:41e, 04:01:42e, 04:01:43e, 04:01:44e,  
04:01:45e, 04:01:46e, 04:01:47e, 04:01:48e,  
04:01:49e, 04:01:50e / DPB1\* 213:01:01e,  
213:01:02e / DPB1\* 334:01:01e, 334:01:02e /  
DPB1\* 350:01e / DPB1\* 415:01e / DPB1\*  
459:01e / DPB1\* 464:01e / DPB1\*  
523:01:01e, 523:01:02e / DPB1\* 534:01e /  
DPB1\* 615:01e / DPB1\* 618:01e / DPB1\*  
670:01e / DPB1\* 677:01e / DPB1\* 699:01e /  
DPB1\* 755:01e / DPB1\* 757:01e / DPB1\*  
765:01e / DPB1\* 767:01e / DPB1\* 784:01e /  
DPB1\* 804:01e / DPB1\* 806:01:01:01e,  
806:01:01:02e / DPB1\* 813:01e / DPB1\*  
820:01e / DPB1\* 824:01:01e, 824:01:02e /  
DPB1\* 826:01e / DPB1\* 850:01e / DPB1\*  
859:01e / DPB1\* 880:01e / DPB1\* 882:01e /  
DPB1\* 926:01e / DPB1\* 932:01e / DPB1\*  
939:01e / DPB1\* 978:01e / DPB1\* 988:01e /  
DPB1\* 989:01e / DPB1\* 992:01e / DPB1\*  
997:01e / DPB1\* 1001:01e / DPB1\*  
1002:01e / DPB1\* 1003:01e / DPB1\*  
1004:01e / DPB1\* 1010:01e / DPB1\*  
1011:01e / DPB1\* 1023:01e / DPB1\*  
1033:01e / DPB1\* 1074:01e / DPB1\*  
1086:01e / DPB1\* 1091:01e / DPB1\*  
1100:01e / DPB1\* 1129:01e / DPB1\*  
1132:01e / DPB1\* 1146:01e / DPB1\*  
1148:01Qe / DPB1\* 1152:01e / DPB1\*  
1155:01e / DPB1\* 1161:01e / DPB1\*  
1164:01e

DPB1\* 04:01:01:24Ne / DPB1\* 99:01e /  
DPB1\* 120:01Ne / DPB1\* 121:01e / DPB1\*  
128:01e / DPB1\* 134:01e / DPB1\* 149:01e /  
DPB1\* 169:01e / DPB1\* 174:01e / DPB1\*  
175:01e / DPB1\* 180:01e / DPB1\* 181:01e /  
DPB1\* 192:01e / DPB1\* 193:01e / DPB1\*  
194:01e / DPB1\* 195:01e / DPB1\* 212:01e /  
DPB1\* 224:01e / DPB1\* 225:01e / DPB1\*  
228:01e / DPB1\* 231:01e / DPB1\* 232:01e /  
DPB1\* 240:01e / DPB1\* 253:01e / DPB1\*  
255:01e / DPB1\* 262:01e / DPB1\* 272:01e /  
DPB1\* 275:01e / DPB1\* 276:01e / DPB1\*  
281:01e / DPB1\* 282:01e / DPB1\* 283:01e /  
DPB1\* 298:01e / DPB1\* 320:01e / DPB1\*  
323:01e / DPB1\* 335:01e / DPB1\* 336:01e /  
DPB1\* 341:01e / DPB1\* 356:01e / DPB1\*  
360:01e / DPB1\* 372:01e / DPB1\* 376:01e /  
DPB1\* 378:01e / DPB1\* 396:01e / DPB1\*  
397:01e / DPB1\* 418:01e / DPB1\* 425:01e /  
DPB1\* 426:01e / DPB1\* 428:01e / DPB1\*  
434:01e / DPB1\* 453:01e / DPB1\* 455:01Ne /  
DPB1\* 465:01e / DPB1\* 468:01e / DPB1\*  
475:01e / DPB1\* 476:01e / DPB1\* 479:01e /  
DPB1\* 485:01e / DPB1\* 486:01e / DPB1\*  
487:01e / DPB1\* 497:01e / DPB1\* 500:01e /  
DPB1\* 520:01e / DPB1\* 521:01e / DPB1\*  
522:01e / DPB1\* 524:01e / DPB1\* 529:01e /  
DPB1\* 553:01e / DPB1\* 554:01e / DPB1\*  
556:01e / DPB1\* 559:01e / DPB1\* 569:01e /  
DPB1\* 575:01e / DPB1\* 578:01e / DPB1\*

-

583:01e / DPB1\* 591:01e / DPB1\* 593:01e /  
 DPB1\* 607:01e / DPB1\* 614:01e / DPB1\*  
 625:01e / DPB1\* 643:01e / DPB1\* 658:01e /  
 DPB1\* 666:01e / DPB1\* 682:01e / DPB1\*  
 683:01e / DPB1\* 694:01e / DPB1\* 722:01e /  
 DPB1\* 739:01e / DPB1\* 742:01e / DPB1\*  
 750:01e / DPB1\* 754:01Ne / DPB1\*  
 756:01Ne / DPB1\* 758:01e / DPB1\* 761:01e /  
 DPB1\* 769:01e / DPB1\* 772:01e / DPB1\*  
 773:01e / DPB1\* 788:01e / DPB1\* 795:01e /  
 DPB1\* 803:01e / DPB1\* 808:01e / DPB1\*  
 811:01e / DPB1\* 812:01e / DPB1\* 814:01e /  
 DPB1\* 837:01e / DPB1\* 842:01e / DPB1\*  
 852:01e / DPB1\* 878:01Ne / DPB1\* 895:01e /  
 DPB1\* 915:01e / DPB1\* 957:01e / DPB1\*  
 966:01e / DPB1\* 974:01Ne / DPB1\* 993:01e /  
 DPB1\* 1040:01e / DPB1\* 1042:01e / DPB1\*  
 1048:01e / DPB1\* 1060:01e / DPB1\*  
 1062:01e / DPB1\* 1064:01e / DPB1\*  
 1066:01e / DPB1\* 1108:01e / DPB1\*  
 1112:01Ne / DPB1\* 1113:01e / DPB1\*  
 1121:01Ne / DPB1\* 1139:01e / DPB1\*  
 1167:01e

**EDP867**

DPB1\* 867:01Ne

-

LFQG

EEFA

CCG

HPGGE

D

GRAH

1 rare

*One side of this epitype requires a RARE allele, review results to confirm assignment.*

OR

| EPITYPE                                  | ALLELES                                                                                                                                                                                                                                                                                                                                                                                                                                                                                                                                                                                                                                                                                                                                                                                                                                                                                                                                                                                                                                                                                                                                                                                                                                                                                                                                                                                                 | P GROUP                                 | HVR-A | HVR-B | HVR-C | HVR-D | HVR-E | HVR-F |
|------------------------------------------|---------------------------------------------------------------------------------------------------------------------------------------------------------------------------------------------------------------------------------------------------------------------------------------------------------------------------------------------------------------------------------------------------------------------------------------------------------------------------------------------------------------------------------------------------------------------------------------------------------------------------------------------------------------------------------------------------------------------------------------------------------------------------------------------------------------------------------------------------------------------------------------------------------------------------------------------------------------------------------------------------------------------------------------------------------------------------------------------------------------------------------------------------------------------------------------------------------------------------------------------------------------------------------------------------------------------------------------------------------------------------------------------------------|-----------------------------------------|-------|-------|-------|-------|-------|-------|
| <b>EDP04</b><br><br>1 common<br>291 rare | <b>DPB1* 04:01:01:01</b> , 04:01:01:02e,<br>04:01:01:03e, 04:01:01:04e, 04:01:01:05e,<br>04:01:01:06e, 04:01:01:07e, 04:01:01:08e,<br>04:01:01:09e, 04:01:01:10e, 04:01:01:11e,<br>04:01:01:12e, 04:01:01:13e, 04:01:01:14e,<br>04:01:01:15e, 04:01:01:16e, 04:01:01:17e,<br>04:01:01:18e, 04:01:01:19e, 04:01:01:20e,<br>04:01:01:21e, 04:01:01:22e, 04:01:01:23e,<br>04:01:01:25e, 04:01:01:26e, 04:01:01:27e,<br>04:01:01:28e, 04:01:01:29e, 04:01:01:30e,<br>04:01:01:31e, 04:01:01:32e, 04:01:01:33e,<br>04:01:01:34e, 04:01:01:35e, 04:01:01:36e,<br>04:01:01:37e, 04:01:01:38e, 04:01:01:39e,<br>04:01:01:40e, 04:01:01:41e, 04:01:01:42e,<br>04:01:01:43e, 04:01:01:44e, 04:01:01:45e,<br>04:01:01:46e, 04:01:01:47e, 04:01:01:48e,<br>04:01:01:49e, 04:01:01:50e, 04:01:01:51e,<br>04:01:01:52e, 04:01:01:53e, 04:01:02e,<br>04:01:03e, 04:01:04:01e, 04:01:04:02e,<br>04:01:05e, 04:01:06e, 04:01:07e, 04:01:08e,<br>04:01:09e, 04:01:10e, 04:01:11e, 04:01:12e,<br>04:01:13e, 04:01:14e, 04:01:15e, 04:01:16e,<br>04:01:17e, 04:01:18e, 04:01:19e, 04:01:20e,<br>04:01:21e, 04:01:22e, 04:01:23e, 04:01:24e,<br>04:01:25e, 04:01:26e, 04:01:27e, 04:01:28e,<br>04:01:29e, 04:01:30e, 04:01:31e, 04:01:32e,<br>04:01:33e, 04:01:34e, 04:01:35e, 04:01:36e,<br>04:01:37:01e, 04:01:37:02e, 04:01:38e,<br>04:01:39:01e, 04:01:39:02e, 04:01:40e,<br>04:01:41e, 04:01:42e, 04:01:43e, 04:01:44e, | 04:01P<br>213:01P<br>334:01P<br>523:01P | LFQG  | EEFA  | AAE   | ILEEK | M     | GGPM  |

04:01:45e, 04:01:46e, 04:01:47e, 04:01:48e,  
04:01:49e, 04:01:50e / DPB1\* 213:01:01e,  
213:01:02e / DPB1\* 334:01:01e, 334:01:02e /  
DPB1\* 350:01e / DPB1\* 415:01e / DPB1\*  
459:01e / DPB1\* 464:01e / DPB1\*  
523:01:01e, 523:01:02e / DPB1\* 534:01e /  
DPB1\* 615:01e / DPB1\* 618:01e / DPB1\*  
670:01e / DPB1\* 677:01e / DPB1\* 699:01e /  
DPB1\* 755:01e / DPB1\* 757:01e / DPB1\*  
765:01e / DPB1\* 767:01e / DPB1\* 784:01e /  
DPB1\* 804:01e / DPB1\* 806:01:01:01e,  
806:01:01:02e / DPB1\* 813:01e / DPB1\*  
820:01e / DPB1\* 824:01:01e, 824:01:02e /  
DPB1\* 826:01e / DPB1\* 850:01e / DPB1\*  
859:01e / DPB1\* 880:01e / DPB1\* 882:01e /  
DPB1\* 926:01e / DPB1\* 932:01e / DPB1\*  
939:01e / DPB1\* 978:01e / DPB1\* 988:01e /  
DPB1\* 989:01e / DPB1\* 992:01e / DPB1\*  
997:01e / DPB1\* 1001:01e / DPB1\*  
1002:01e / DPB1\* 1003:01e / DPB1\*  
1004:01e / DPB1\* 1010:01e / DPB1\*  
1011:01e / DPB1\* 1023:01e / DPB1\*  
1033:01e / DPB1\* 1074:01e / DPB1\*  
1086:01e / DPB1\* 1091:01e / DPB1\*  
1100:01e / DPB1\* 1129:01e / DPB1\*  
1132:01e / DPB1\* 1146:01e / DPB1\*  
1148:01Qe / DPB1\* 1152:01e / DPB1\*  
1155:01e / DPB1\* 1161:01e / DPB1\*  
1164:01e

DPB1\* 04:01:01:24Ne / DPB1\* 99:01e /  
DPB1\* 120:01Ne / DPB1\* 121:01e / DPB1\*  
128:01e / DPB1\* 134:01e / DPB1\* 149:01e /  
DPB1\* 169:01e / DPB1\* 174:01e / DPB1\*  
175:01e / DPB1\* 180:01e / DPB1\* 181:01e /  
DPB1\* 192:01e / DPB1\* 193:01e / DPB1\*  
194:01e / DPB1\* 195:01e / DPB1\* 212:01e /  
DPB1\* 224:01e / DPB1\* 225:01e / DPB1\*  
228:01e / DPB1\* 231:01e / DPB1\* 232:01e /  
DPB1\* 240:01e / DPB1\* 253:01e / DPB1\*  
255:01e / DPB1\* 262:01e / DPB1\* 272:01e /  
DPB1\* 275:01e / DPB1\* 276:01e / DPB1\*  
281:01e / DPB1\* 282:01e / DPB1\* 283:01e /  
DPB1\* 298:01e / DPB1\* 320:01e / DPB1\*  
323:01e / DPB1\* 335:01e / DPB1\* 336:01e /  
DPB1\* 341:01e / DPB1\* 356:01e / DPB1\*  
360:01e / DPB1\* 372:01e / DPB1\* 376:01e /  
DPB1\* 378:01e / DPB1\* 396:01e / DPB1\*  
397:01e / DPB1\* 418:01e / DPB1\* 425:01e /  
DPB1\* 426:01e / DPB1\* 428:01e / DPB1\*  
434:01e / DPB1\* 453:01e / DPB1\* 455:01Ne /  
DPB1\* 465:01e / DPB1\* 468:01e / DPB1\*  
475:01e / DPB1\* 476:01e / DPB1\* 479:01e /  
DPB1\* 485:01e / DPB1\* 486:01e / DPB1\*  
487:01e / DPB1\* 497:01e / DPB1\* 500:01e /  
DPB1\* 520:01e / DPB1\* 521:01e / DPB1\*  
522:01e / DPB1\* 524:01e / DPB1\* 529:01e /  
DPB1\* 553:01e / DPB1\* 554:01e / DPB1\*  
556:01e / DPB1\* 559:01e / DPB1\* 569:01e /  
DPB1\* 575:01e / DPB1\* 578:01e / DPB1\*  
583:01e / DPB1\* 591:01e / DPB1\* 593:01e /  
DPB1\* 607:01e / DPB1\* 614:01e / DPB1\*  
625:01e / DPB1\* 643:01e / DPB1\* 658:01e /  
DPB1\* 666:01e / DPB1\* 682:01e / DPB1\*  
683:01e / DPB1\* 694:01e / DPB1\* 722:01e /  
DPB1\* 739:01e / DPB1\* 742:01e / DPB1\*

-

750:01e / DPB1\* 754:01Ne / DPB1\*  
 756:01Ne / DPB1\* 758:01e / DPB1\* 761:01e /  
 DPB1\* 769:01e / DPB1\* 772:01e / DPB1\*  
 773:01e / DPB1\* 788:01e / DPB1\* 795:01e /  
 DPB1\* 803:01e / DPB1\* 808:01e / DPB1\*  
 811:01e / DPB1\* 812:01e / DPB1\* 814:01e /  
 DPB1\* 837:01e / DPB1\* 842:01e / DPB1\*  
 852:01e / DPB1\* 878:01Ne / DPB1\* 895:01e /  
 DPB1\* 915:01e / DPB1\* 957:01e / DPB1\*  
 966:01e / DPB1\* 974:01Ne / DPB1\* 993:01e /  
 DPB1\* 1040:01e / DPB1\* 1042:01e / DPB1\*  
 1048:01e / DPB1\* 1060:01e / DPB1\*  
 1062:01e / DPB1\* 1064:01e / DPB1\*  
 1066:01e / DPB1\* 1108:01e / DPB1\*  
 1112:01Ne / DPB1\* 1113:01e / DPB1\*  
 1121:01Ne / DPB1\* 1139:01e / DPB1\*  
 1167:01e

**EDP177**

DPB1\* 177:01e

-

LFQG

EEFA

AAE

ILEEK

M

SGPM

1 rare

*One side of this epitype requires a RARE allele, review results to confirm assignment.*

OR

| EPITYPE                              | ALLELES                                                                                                                                                                                                                                                                                                                                                                                                                                                                                                                                                                                                                                                                                                                                                                                                                                                                                                                                                                                                                                                                                                                                                                                                                                                                                                                                                                                                                                                                                                                                                                                                                                                                   | P GROUP                                 | HVR-A | HVR-B | HVR-C | HVR-D | HVR-E | HVR-F |
|--------------------------------------|---------------------------------------------------------------------------------------------------------------------------------------------------------------------------------------------------------------------------------------------------------------------------------------------------------------------------------------------------------------------------------------------------------------------------------------------------------------------------------------------------------------------------------------------------------------------------------------------------------------------------------------------------------------------------------------------------------------------------------------------------------------------------------------------------------------------------------------------------------------------------------------------------------------------------------------------------------------------------------------------------------------------------------------------------------------------------------------------------------------------------------------------------------------------------------------------------------------------------------------------------------------------------------------------------------------------------------------------------------------------------------------------------------------------------------------------------------------------------------------------------------------------------------------------------------------------------------------------------------------------------------------------------------------------------|-----------------------------------------|-------|-------|-------|-------|-------|-------|
| <b>EDP04</b><br>1 common<br>291 rare | <b>DPB1* 04:01:01:01</b> , 04:01:01:02e,<br>04:01:01:03e, 04:01:01:04e, 04:01:01:05e,<br>04:01:01:06e, 04:01:01:07e, 04:01:01:08e,<br>04:01:01:09e, 04:01:01:10e, 04:01:01:11e,<br>04:01:01:12e, 04:01:01:13e, 04:01:01:14e,<br>04:01:01:15e, 04:01:01:16e, 04:01:01:17e,<br>04:01:01:18e, 04:01:01:19e, 04:01:01:20e,<br>04:01:01:21e, 04:01:01:22e, 04:01:01:23e,<br>04:01:01:25e, 04:01:01:26e, 04:01:01:27e,<br>04:01:01:28e, 04:01:01:29e, 04:01:01:30e,<br>04:01:01:31e, 04:01:01:32e, 04:01:01:33e,<br>04:01:01:34e, 04:01:01:35e, 04:01:01:36e,<br>04:01:01:37e, 04:01:01:38e, 04:01:01:39e,<br>04:01:01:40e, 04:01:01:41e, 04:01:01:42e,<br>04:01:01:43e, 04:01:01:44e, 04:01:01:45e,<br>04:01:01:46e, 04:01:01:47e, 04:01:01:48e,<br>04:01:01:49e, 04:01:01:50e, 04:01:01:51e,<br>04:01:01:52e, 04:01:01:53e, 04:01:02e,<br>04:01:03e, 04:01:04:01e, 04:01:04:02e,<br>04:01:05e, 04:01:06e, 04:01:07e, 04:01:08e,<br>04:01:09e, 04:01:10e, 04:01:11e, 04:01:12e,<br>04:01:13e, 04:01:14e, 04:01:15e, 04:01:16e,<br>04:01:17e, 04:01:18e, 04:01:19e, 04:01:20e,<br>04:01:21e, 04:01:22e, 04:01:23e, 04:01:24e,<br>04:01:25e, 04:01:26e, 04:01:27e, 04:01:28e,<br>04:01:29e, 04:01:30e, 04:01:31e, 04:01:32e,<br>04:01:33e, 04:01:34e, 04:01:35e, 04:01:36e,<br>04:01:37:01e, 04:01:37:02e, 04:01:38e,<br>04:01:39:01e, 04:01:39:02e, 04:01:40e,<br>04:01:41e, 04:01:42e, 04:01:43e, 04:01:44e,<br>04:01:45e, 04:01:46e, 04:01:47e, 04:01:48e,<br>04:01:49e, 04:01:50e / DPB1* 213:01:01e,<br>213:01:02e / DPB1* 334:01:01e, 334:01:02e /<br>DPB1* 350:01e / DPB1* 415:01e / DPB1*<br>459:01e / DPB1* 464:01e / DPB1*<br>523:01:01e, 523:01:02e / DPB1* 534:01e / | 04:01P<br>213:01P<br>334:01P<br>523:01P | LFQG  | EEFA  | AAE   | ILEEK | M     | GGPM  |

DPB1\* 615:01e / DPB1\* 618:01e / DPB1\*  
670:01e / DPB1\* 677:01e / DPB1\* 699:01e /  
DPB1\* 755:01e / DPB1\* 757:01e / DPB1\*  
765:01e / DPB1\* 767:01e / DPB1\* 784:01e /  
DPB1\* 804:01e / DPB1\* 806:01:01:01e,  
806:01:01:02e / DPB1\* 813:01e / DPB1\*  
820:01e / DPB1\* 824:01:01e, 824:01:02e /  
DPB1\* 826:01e / DPB1\* 850:01e / DPB1\*  
859:01e / DPB1\* 880:01e / DPB1\* 882:01e /  
DPB1\* 926:01e / DPB1\* 932:01e / DPB1\*  
939:01e / DPB1\* 978:01e / DPB1\* 988:01e /  
DPB1\* 989:01e / DPB1\* 992:01e / DPB1\*  
997:01e / DPB1\* 1001:01e / DPB1\*  
1002:01e / DPB1\* 1003:01e / DPB1\*  
1004:01e / DPB1\* 1010:01e / DPB1\*  
1011:01e / DPB1\* 1023:01e / DPB1\*  
1033:01e / DPB1\* 1074:01e / DPB1\*  
1086:01e / DPB1\* 1091:01e / DPB1\*  
1100:01e / DPB1\* 1129:01e / DPB1\*  
1132:01e / DPB1\* 1146:01e / DPB1\*  
1148:01Qe / DPB1\* 1152:01e / DPB1\*  
1155:01e / DPB1\* 1161:01e / DPB1\*  
1164:01e

DPB1\* 04:01:01:24Ne / DPB1\* 99:01e /  
DPB1\* 120:01Ne / DPB1\* 121:01e / DPB1\*  
128:01e / DPB1\* 134:01e / DPB1\* 149:01e /  
DPB1\* 169:01e / DPB1\* 174:01e / DPB1\*  
175:01e / DPB1\* 180:01e / DPB1\* 181:01e /  
DPB1\* 192:01e / DPB1\* 193:01e / DPB1\*  
194:01e / DPB1\* 195:01e / DPB1\* 212:01e /  
DPB1\* 224:01e / DPB1\* 225:01e / DPB1\*  
228:01e / DPB1\* 231:01e / DPB1\* 232:01e /  
DPB1\* 240:01e / DPB1\* 253:01e / DPB1\*  
255:01e / DPB1\* 262:01e / DPB1\* 272:01e /  
DPB1\* 275:01e / DPB1\* 276:01e / DPB1\*  
281:01e / DPB1\* 282:01e / DPB1\* 283:01e /  
DPB1\* 298:01e / DPB1\* 320:01e / DPB1\*  
323:01e / DPB1\* 335:01e / DPB1\* 336:01e /  
DPB1\* 341:01e / DPB1\* 356:01e / DPB1\*  
360:01e / DPB1\* 372:01e / DPB1\* 376:01e /  
DPB1\* 378:01e / DPB1\* 396:01e / DPB1\*  
397:01e / DPB1\* 418:01e / DPB1\* 425:01e /  
DPB1\* 426:01e / DPB1\* 428:01e / DPB1\*  
434:01e / DPB1\* 453:01e / DPB1\* 455:01Ne /  
DPB1\* 465:01e / DPB1\* 468:01e / DPB1\*  
475:01e / DPB1\* 476:01e / DPB1\* 479:01e /  
DPB1\* 485:01e / DPB1\* 486:01e / DPB1\*  
487:01e / DPB1\* 497:01e / DPB1\* 500:01e /  
DPB1\* 520:01e / DPB1\* 521:01e / DPB1\*  
522:01e / DPB1\* 524:01e / DPB1\* 529:01e /  
DPB1\* 553:01e / DPB1\* 554:01e / DPB1\*  
556:01e / DPB1\* 559:01e / DPB1\* 569:01e /  
DPB1\* 575:01e / DPB1\* 578:01e / DPB1\*  
583:01e / DPB1\* 591:01e / DPB1\* 593:01e /  
DPB1\* 607:01e / DPB1\* 614:01e / DPB1\*  
625:01e / DPB1\* 643:01e / DPB1\* 658:01e /  
DPB1\* 666:01e / DPB1\* 682:01e / DPB1\*  
683:01e / DPB1\* 694:01e / DPB1\* 722:01e /  
DPB1\* 739:01e / DPB1\* 742:01e / DPB1\*  
750:01e / DPB1\* 754:01Ne / DPB1\*  
756:01Ne / DPB1\* 758:01e / DPB1\* 761:01e /  
DPB1\* 769:01e / DPB1\* 772:01e / DPB1\*  
773:01e / DPB1\* 788:01e / DPB1\* 795:01e /  
DPB1\* 803:01e / DPB1\* 808:01e / DPB1\*  
811:01e / DPB1\* 812:01e / DPB1\* 814:01e /

-

DPB1\* 837:01e / DPB1\* 842:01e / DPB1\* 852:01e / DPB1\* 878:01Ne / DPB1\* 895:01e / DPB1\* 915:01e / DPB1\* 957:01e / DPB1\* 966:01e / DPB1\* 974:01Ne / DPB1\* 993:01e / DPB1\* 1040:01e / DPB1\* 1042:01e / DPB1\* 1048:01e / DPB1\* 1060:01e / DPB1\* 1062:01e / DPB1\* 1064:01e / DPB1\* 1066:01e / DPB1\* 1108:01e / DPB1\* 1112:01Ne / DPB1\* 1113:01e / DPB1\* 1121:01Ne / DPB1\* 1139:01e / DPB1\* 1167:01e

EDP747

DPB1\* 747:01e

-

VFQG

EEFA

AAE

ILEEK

M

GGPM

1 rare

One side of this epitope requires a RARE allele, review results to confirm assignment.

OR

| EPITYPE                       | ALLELES                                                                                                                                                                                                                                                                                                                                                                                                                                                                                                                                                                                                                                                                                                                                                                                                                                                                                                                                                                                                                                                                                                                                                                                                                                                                                                                                                                                                                                                                                                                                                                                                                                                                                                                                                                                             | P GROUP                                 | HVR-A | HVR-B | HVR-C | HVR-D | HVR-E | HVR-F |
|-------------------------------|-----------------------------------------------------------------------------------------------------------------------------------------------------------------------------------------------------------------------------------------------------------------------------------------------------------------------------------------------------------------------------------------------------------------------------------------------------------------------------------------------------------------------------------------------------------------------------------------------------------------------------------------------------------------------------------------------------------------------------------------------------------------------------------------------------------------------------------------------------------------------------------------------------------------------------------------------------------------------------------------------------------------------------------------------------------------------------------------------------------------------------------------------------------------------------------------------------------------------------------------------------------------------------------------------------------------------------------------------------------------------------------------------------------------------------------------------------------------------------------------------------------------------------------------------------------------------------------------------------------------------------------------------------------------------------------------------------------------------------------------------------------------------------------------------------|-----------------------------------------|-------|-------|-------|-------|-------|-------|
| EDP04<br>1 common<br>291 rare | DPB1* 04:01:01:01, 04:01:01:02e, 04:01:01:03e, 04:01:01:04e, 04:01:01:05e, 04:01:01:06e, 04:01:01:07e, 04:01:01:08e, 04:01:01:09e, 04:01:01:10e, 04:01:01:11e, 04:01:01:12e, 04:01:01:13e, 04:01:01:14e, 04:01:01:15e, 04:01:01:16e, 04:01:01:17e, 04:01:01:18e, 04:01:01:19e, 04:01:01:20e, 04:01:01:21e, 04:01:01:22e, 04:01:01:23e, 04:01:01:25e, 04:01:01:26e, 04:01:01:27e, 04:01:01:28e, 04:01:01:29e, 04:01:01:30e, 04:01:01:31e, 04:01:01:32e, 04:01:01:33e, 04:01:01:34e, 04:01:01:35e, 04:01:01:36e, 04:01:01:37e, 04:01:01:38e, 04:01:01:39e, 04:01:01:40e, 04:01:01:41e, 04:01:01:42e, 04:01:01:43e, 04:01:01:44e, 04:01:01:45e, 04:01:01:46e, 04:01:01:47e, 04:01:01:48e, 04:01:01:49e, 04:01:01:50e, 04:01:01:51e, 04:01:01:52e, 04:01:01:53e, 04:01:02e, 04:01:03e, 04:01:04:01e, 04:01:04:02e, 04:01:05e, 04:01:06e, 04:01:07e, 04:01:08e, 04:01:09e, 04:01:10e, 04:01:11e, 04:01:12e, 04:01:13e, 04:01:14e, 04:01:15e, 04:01:16e, 04:01:17e, 04:01:18e, 04:01:19e, 04:01:20e, 04:01:21e, 04:01:22e, 04:01:23e, 04:01:24e, 04:01:25e, 04:01:26e, 04:01:27e, 04:01:28e, 04:01:29e, 04:01:30e, 04:01:31e, 04:01:32e, 04:01:33e, 04:01:34e, 04:01:35e, 04:01:36e, 04:01:37:01e, 04:01:37:02e, 04:01:38e, 04:01:39:01e, 04:01:39:02e, 04:01:40e, 04:01:41e, 04:01:42e, 04:01:43e, 04:01:44e, 04:01:45e, 04:01:46e, 04:01:47e, 04:01:48e, 04:01:49e, 04:01:50e / DPB1* 213:01:01e, 213:01:02e / DPB1* 334:01:01e, 334:01:02e / DPB1* 350:01e / DPB1* 415:01e / DPB1* 459:01e / DPB1* 464:01e / DPB1* 523:01:01e, 523:01:02e / DPB1* 534:01e / DPB1* 615:01e / DPB1* 618:01e / DPB1* 670:01e / DPB1* 677:01e / DPB1* 699:01e / DPB1* 755:01e / DPB1* 757:01e / DPB1* 765:01e / DPB1* 767:01e / DPB1* 784:01e / DPB1* 804:01e / DPB1* 806:01:01:01e, 806:01:01:02e / DPB1* 813:01e / DPB1* | 04:01P<br>213:01P<br>334:01P<br>523:01P | LFQG  | EEFA  | AAE   | ILEEK | M     | GGPM  |



820:01e / DPB1\* 824:01:01e, 824:01:02e /  
DPB1\* 826:01e / DPB1\* 850:01e / DPB1\*  
859:01e / DPB1\* 880:01e / DPB1\* 882:01e /  
DPB1\* 926:01e / DPB1\* 932:01e / DPB1\*  
939:01e / DPB1\* 978:01e / DPB1\* 988:01e /  
DPB1\* 989:01e / DPB1\* 992:01e / DPB1\*  
997:01e / DPB1\* 1001:01e / DPB1\*  
1002:01e / DPB1\* 1003:01e / DPB1\*  
1004:01e / DPB1\* 1010:01e / DPB1\*  
1011:01e / DPB1\* 1023:01e / DPB1\*  
1033:01e / DPB1\* 1074:01e / DPB1\*  
1086:01e / DPB1\* 1091:01e / DPB1\*  
1100:01e / DPB1\* 1129:01e / DPB1\*  
1132:01e / DPB1\* 1146:01e / DPB1\*  
1148:01Qe / DPB1\* 1152:01e / DPB1\*  
1155:01e / DPB1\* 1161:01e / DPB1\*  
1164:01e

DPB1\* 04:01:01:24Ne / DPB1\* 99:01e /  
DPB1\* 120:01Ne / DPB1\* 121:01e / DPB1\*  
128:01e / DPB1\* 134:01e / DPB1\* 149:01e /  
DPB1\* 169:01e / DPB1\* 174:01e / DPB1\*  
175:01e / DPB1\* 180:01e / DPB1\* 181:01e /  
DPB1\* 192:01e / DPB1\* 193:01e / DPB1\*  
194:01e / DPB1\* 195:01e / DPB1\* 212:01e /  
DPB1\* 224:01e / DPB1\* 225:01e / DPB1\*  
228:01e / DPB1\* 231:01e / DPB1\* 232:01e /  
DPB1\* 240:01e / DPB1\* 253:01e / DPB1\*  
255:01e / DPB1\* 262:01e / DPB1\* 272:01e /  
DPB1\* 275:01e / DPB1\* 276:01e / DPB1\*  
281:01e / DPB1\* 282:01e / DPB1\* 283:01e /  
DPB1\* 298:01e / DPB1\* 320:01e / DPB1\*  
323:01e / DPB1\* 335:01e / DPB1\* 336:01e /  
DPB1\* 341:01e / DPB1\* 356:01e / DPB1\*  
360:01e / DPB1\* 372:01e / DPB1\* 376:01e /  
DPB1\* 378:01e / DPB1\* 396:01e / DPB1\*  
397:01e / DPB1\* 418:01e / DPB1\* 425:01e /  
DPB1\* 426:01e / DPB1\* 428:01e / DPB1\*  
434:01e / DPB1\* 453:01e / DPB1\* 455:01Ne /  
DPB1\* 465:01e / DPB1\* 468:01e / DPB1\*  
475:01e / DPB1\* 476:01e / DPB1\* 479:01e /  
DPB1\* 485:01e / DPB1\* 486:01e / DPB1\*  
487:01e / DPB1\* 497:01e / DPB1\* 500:01e /  
DPB1\* 520:01e / DPB1\* 521:01e / DPB1\*  
522:01e / DPB1\* 524:01e / DPB1\* 529:01e /  
DPB1\* 553:01e / DPB1\* 554:01e / DPB1\*  
556:01e / DPB1\* 559:01e / DPB1\* 569:01e /  
DPB1\* 575:01e / DPB1\* 578:01e / DPB1\*  
583:01e / DPB1\* 591:01e / DPB1\* 593:01e /  
DPB1\* 607:01e / DPB1\* 614:01e / DPB1\*  
625:01e / DPB1\* 643:01e / DPB1\* 658:01e /  
DPB1\* 666:01e / DPB1\* 682:01e / DPB1\*  
683:01e / DPB1\* 694:01e / DPB1\* 722:01e /  
DPB1\* 739:01e / DPB1\* 742:01e / DPB1\*  
750:01e / DPB1\* 754:01Ne / DPB1\*  
756:01Ne / DPB1\* 758:01e / DPB1\* 761:01e /  
DPB1\* 769:01e / DPB1\* 772:01e / DPB1\*  
773:01e / DPB1\* 788:01e / DPB1\* 795:01e /  
DPB1\* 803:01e / DPB1\* 808:01e / DPB1\*  
811:01e / DPB1\* 812:01e / DPB1\* 814:01e /  
DPB1\* 837:01e / DPB1\* 842:01e / DPB1\*  
852:01e / DPB1\* 878:01Ne / DPB1\* 895:01e /  
DPB1\* 915:01e / DPB1\* 957:01e / DPB1\*  
966:01e / DPB1\* 974:01Ne / DPB1\* 993:01e /  
DPB1\* 1040:01e / DPB1\* 1042:01e / DPB1\*  
1048:01e / DPB1\* 1060:01e / DPB1\*

-

|                                                                                               |                                                                                                                                                                |   |      |      |     |       |   |      |  |
|-----------------------------------------------------------------------------------------------|----------------------------------------------------------------------------------------------------------------------------------------------------------------|---|------|------|-----|-------|---|------|--|
|                                                                                               | 1062:01e / DPB1* 1064:01e / DPB1*<br>1066:01e / DPB1* 1108:01e / DPB1*<br>1112:01Ne / DPB1* 1113:01e / DPB1*<br>1121:01Ne / DPB1* 1139:01e / DPB1*<br>1167:01e |   |      |      |     |       |   |      |  |
| <b>EDP1122</b>                                                                                | DPB1* 1122:01e                                                                                                                                                 | - | LFQG | EECA | AAE | ILEEK | M | GGPM |  |
| 1 rare                                                                                        |                                                                                                                                                                |   |      |      |     |       |   |      |  |
| <i>One side of this epitope requires a RARE allele, review results to confirm assignment.</i> |                                                                                                                                                                |   |      |      |     |       |   |      |  |

OR

| EPITYPE                                  | ALLELES                                                                                                                                                                                                                                                                                                                                                                                                                                                                                                                                                                                                                                                                                                                                                                                                                                                                                                                                                                                                                                                                                                                                                                                                                                                                                                                                                                                                                                                                                                                                                                                                                                                                                                                                                                                                                                                                                                                                                                                                                                                                                                                                                                                                 | P GROUP                                 | HVR-A | HVR-B | HVR-C | HVR-D | HVR-E | HVR-F |
|------------------------------------------|---------------------------------------------------------------------------------------------------------------------------------------------------------------------------------------------------------------------------------------------------------------------------------------------------------------------------------------------------------------------------------------------------------------------------------------------------------------------------------------------------------------------------------------------------------------------------------------------------------------------------------------------------------------------------------------------------------------------------------------------------------------------------------------------------------------------------------------------------------------------------------------------------------------------------------------------------------------------------------------------------------------------------------------------------------------------------------------------------------------------------------------------------------------------------------------------------------------------------------------------------------------------------------------------------------------------------------------------------------------------------------------------------------------------------------------------------------------------------------------------------------------------------------------------------------------------------------------------------------------------------------------------------------------------------------------------------------------------------------------------------------------------------------------------------------------------------------------------------------------------------------------------------------------------------------------------------------------------------------------------------------------------------------------------------------------------------------------------------------------------------------------------------------------------------------------------------------|-----------------------------------------|-------|-------|-------|-------|-------|-------|
| <b>EDP04</b><br><br>1 common<br>291 rare | <b>DPB1* 04:01:01:01</b> , 04:01:01:02e,<br>04:01:01:03e, 04:01:01:04e, 04:01:01:05e,<br>04:01:01:06e, 04:01:01:07e, 04:01:01:08e,<br>04:01:01:09e, 04:01:01:10e, 04:01:01:11e,<br>04:01:01:12e, 04:01:01:13e, 04:01:01:14e,<br>04:01:01:15e, 04:01:01:16e, 04:01:01:17e,<br>04:01:01:18e, 04:01:01:19e, 04:01:01:20e,<br>04:01:01:21e, 04:01:01:22e, 04:01:01:23e,<br>04:01:01:25e, 04:01:01:26e, 04:01:01:27e,<br>04:01:01:28e, 04:01:01:29e, 04:01:01:30e,<br>04:01:01:31e, 04:01:01:32e, 04:01:01:33e,<br>04:01:01:34e, 04:01:01:35e, 04:01:01:36e,<br>04:01:01:37e, 04:01:01:38e, 04:01:01:39e,<br>04:01:01:40e, 04:01:01:41e, 04:01:01:42e,<br>04:01:01:43e, 04:01:01:44e, 04:01:01:45e,<br>04:01:01:46e, 04:01:01:47e, 04:01:01:48e,<br>04:01:01:49e, 04:01:01:50e, 04:01:01:51e,<br>04:01:01:52e, 04:01:01:53e, 04:01:02e,<br>04:01:03e, 04:01:04:01e, 04:01:04:02e,<br>04:01:05e, 04:01:06e, 04:01:07e, 04:01:08e,<br>04:01:09e, 04:01:10e, 04:01:11e, 04:01:12e,<br>04:01:13e, 04:01:14e, 04:01:15e, 04:01:16e,<br>04:01:17e, 04:01:18e, 04:01:19e, 04:01:20e,<br>04:01:21e, 04:01:22e, 04:01:23e, 04:01:24e,<br>04:01:25e, 04:01:26e, 04:01:27e, 04:01:28e,<br>04:01:29e, 04:01:30e, 04:01:31e, 04:01:32e,<br>04:01:33e, 04:01:34e, 04:01:35e, 04:01:36e,<br>04:01:37:01e, 04:01:37:02e, 04:01:38e,<br>04:01:39:01e, 04:01:39:02e, 04:01:40e,<br>04:01:41e, 04:01:42e, 04:01:43e, 04:01:44e,<br>04:01:45e, 04:01:46e, 04:01:47e, 04:01:48e,<br>04:01:49e, 04:01:50e / DPB1* 213:01:01e,<br>213:01:02e / DPB1* 334:01:01e, 334:01:02e /<br>DPB1* 350:01e / DPB1* 415:01e / DPB1*<br>459:01e / DPB1* 464:01e / DPB1*<br>523:01:01e, 523:01:02e / DPB1* 534:01e /<br>DPB1* 615:01e / DPB1* 618:01e / DPB1*<br>670:01e / DPB1* 677:01e / DPB1* 699:01e /<br>DPB1* 755:01e / DPB1* 757:01e / DPB1*<br>765:01e / DPB1* 767:01e / DPB1* 784:01e /<br>DPB1* 804:01e / DPB1* 806:01:01:01e,<br>806:01:01:02e / DPB1* 813:01e / DPB1*<br>820:01e / DPB1* 824:01:01e, 824:01:02e /<br>DPB1* 826:01e / DPB1* 850:01e / DPB1*<br>859:01e / DPB1* 880:01e / DPB1* 882:01e /<br>DPB1* 926:01e / DPB1* 932:01e / DPB1*<br>939:01e / DPB1* 978:01e / DPB1* 988:01e /<br>DPB1* 989:01e / DPB1* 992:01e / DPB1* | 04:01P<br>213:01P<br>334:01P<br>523:01P | LFQG  | EEFA  | AAE   | ILEEK | M     | GGPM  |

997:01e / DPB1\* 1001:01e / DPB1\*  
1002:01e / DPB1\* 1003:01e / DPB1\*  
1004:01e / DPB1\* 1010:01e / DPB1\*  
1011:01e / DPB1\* 1023:01e / DPB1\*  
1033:01e / DPB1\* 1074:01e / DPB1\*  
1086:01e / DPB1\* 1091:01e / DPB1\*  
1100:01e / DPB1\* 1129:01e / DPB1\*  
1132:01e / DPB1\* 1146:01e / DPB1\*  
1148:01Qe / DPB1\* 1152:01e / DPB1\*  
1155:01e / DPB1\* 1161:01e / DPB1\*  
1164:01e

DPB1\* 04:01:01:24Ne / DPB1\* 99:01e /  
DPB1\* 120:01Ne / DPB1\* 121:01e / DPB1\*  
128:01e / DPB1\* 134:01e / DPB1\* 149:01e /  
DPB1\* 169:01e / DPB1\* 174:01e / DPB1\*  
175:01e / DPB1\* 180:01e / DPB1\* 181:01e /  
DPB1\* 192:01e / DPB1\* 193:01e / DPB1\*  
194:01e / DPB1\* 195:01e / DPB1\* 212:01e /  
DPB1\* 224:01e / DPB1\* 225:01e / DPB1\*  
228:01e / DPB1\* 231:01e / DPB1\* 232:01e /  
DPB1\* 240:01e / DPB1\* 253:01e / DPB1\*  
255:01e / DPB1\* 262:01e / DPB1\* 272:01e /  
DPB1\* 275:01e / DPB1\* 276:01e / DPB1\*  
281:01e / DPB1\* 282:01e / DPB1\* 283:01e /  
DPB1\* 298:01e / DPB1\* 320:01e / DPB1\*  
323:01e / DPB1\* 335:01e / DPB1\* 336:01e /  
DPB1\* 341:01e / DPB1\* 356:01e / DPB1\*  
360:01e / DPB1\* 372:01e / DPB1\* 376:01e /  
DPB1\* 378:01e / DPB1\* 396:01e / DPB1\*  
397:01e / DPB1\* 418:01e / DPB1\* 425:01e /  
DPB1\* 426:01e / DPB1\* 428:01e / DPB1\*  
434:01e / DPB1\* 453:01e / DPB1\* 455:01Ne /  
DPB1\* 465:01e / DPB1\* 468:01e / DPB1\*  
475:01e / DPB1\* 476:01e / DPB1\* 479:01e /  
DPB1\* 485:01e / DPB1\* 486:01e / DPB1\*  
487:01e / DPB1\* 497:01e / DPB1\* 500:01e /  
DPB1\* 520:01e / DPB1\* 521:01e / DPB1\*  
522:01e / DPB1\* 524:01e / DPB1\* 529:01e /  
DPB1\* 553:01e / DPB1\* 554:01e / DPB1\*  
556:01e / DPB1\* 559:01e / DPB1\* 569:01e /  
DPB1\* 575:01e / DPB1\* 578:01e / DPB1\*  
583:01e / DPB1\* 591:01e / DPB1\* 593:01e /  
DPB1\* 607:01e / DPB1\* 614:01e / DPB1\*  
625:01e / DPB1\* 643:01e / DPB1\* 658:01e /  
DPB1\* 666:01e / DPB1\* 682:01e / DPB1\*  
683:01e / DPB1\* 694:01e / DPB1\* 722:01e /  
DPB1\* 739:01e / DPB1\* 742:01e / DPB1\*  
750:01e / DPB1\* 754:01Ne / DPB1\*  
756:01Ne / DPB1\* 758:01e / DPB1\* 761:01e /  
DPB1\* 769:01e / DPB1\* 772:01e / DPB1\*  
773:01e / DPB1\* 788:01e / DPB1\* 795:01e /  
DPB1\* 803:01e / DPB1\* 808:01e / DPB1\*  
811:01e / DPB1\* 812:01e / DPB1\* 814:01e /  
DPB1\* 837:01e / DPB1\* 842:01e / DPB1\*  
852:01e / DPB1\* 878:01Ne / DPB1\* 895:01e /  
DPB1\* 915:01e / DPB1\* 957:01e / DPB1\*  
966:01e / DPB1\* 974:01Ne / DPB1\* 993:01e /  
DPB1\* 1040:01e / DPB1\* 1042:01e / DPB1\*  
1048:01e / DPB1\* 1060:01e / DPB1\*  
1062:01e / DPB1\* 1064:01e / DPB1\*  
1066:01e / DPB1\* 1108:01e / DPB1\*  
1112:01Ne / DPB1\* 1113:01e / DPB1\*  
1121:01Ne / DPB1\* 1139:01e / DPB1\*  
1167:01e

-

|                                                                                               |               |   |      |      |     |       |   |             |
|-----------------------------------------------------------------------------------------------|---------------|---|------|------|-----|-------|---|-------------|
| <b>EDP280</b>                                                                                 | DPB1* 280:01e | - | LFQG | EEFA | AAE | ILEEK | M | <b>GAPM</b> |
| 1 rare                                                                                        |               |   |      |      |     |       |   |             |
| <i>One side of this epitype requires a RARE allele, review results to confirm assignment.</i> |               |   |      |      |     |       |   |             |

OR

| EPITYPE                                  | ALLELES                                                                                                                                                                                                                                                                                                                                                                                                                                                                                                                                                                                                                                                                                                                                                                                                                                                                                                                                                                                                                                                                                                                                                                                                                                                                                                                                                                                                                                                                                                                                                                                                                                                                                                                                                                                                                                                                                                                                                                                                                                                                                                                                                                                                                                                                                                                                                                                                                              | P GROUP                                 | HVR-A | HVR-B | HVR-C | HVR-D | HVR-E | HVR-F |
|------------------------------------------|--------------------------------------------------------------------------------------------------------------------------------------------------------------------------------------------------------------------------------------------------------------------------------------------------------------------------------------------------------------------------------------------------------------------------------------------------------------------------------------------------------------------------------------------------------------------------------------------------------------------------------------------------------------------------------------------------------------------------------------------------------------------------------------------------------------------------------------------------------------------------------------------------------------------------------------------------------------------------------------------------------------------------------------------------------------------------------------------------------------------------------------------------------------------------------------------------------------------------------------------------------------------------------------------------------------------------------------------------------------------------------------------------------------------------------------------------------------------------------------------------------------------------------------------------------------------------------------------------------------------------------------------------------------------------------------------------------------------------------------------------------------------------------------------------------------------------------------------------------------------------------------------------------------------------------------------------------------------------------------------------------------------------------------------------------------------------------------------------------------------------------------------------------------------------------------------------------------------------------------------------------------------------------------------------------------------------------------------------------------------------------------------------------------------------------------|-----------------------------------------|-------|-------|-------|-------|-------|-------|
| <b>EDP04</b><br><br>1 common<br>291 rare | <b>DPB1* 04:01:01:01</b> , 04:01:01:02e,<br>04:01:01:03e, 04:01:01:04e, 04:01:01:05e,<br>04:01:01:06e, 04:01:01:07e, 04:01:01:08e,<br>04:01:01:09e, 04:01:01:10e, 04:01:01:11e,<br>04:01:01:12e, 04:01:01:13e, 04:01:01:14e,<br>04:01:01:15e, 04:01:01:16e, 04:01:01:17e,<br>04:01:01:18e, 04:01:01:19e, 04:01:01:20e,<br>04:01:01:21e, 04:01:01:22e, 04:01:01:23e,<br>04:01:01:25e, 04:01:01:26e, 04:01:01:27e,<br>04:01:01:28e, 04:01:01:29e, 04:01:01:30e,<br>04:01:01:31e, 04:01:01:32e, 04:01:01:33e,<br>04:01:01:34e, 04:01:01:35e, 04:01:01:36e,<br>04:01:01:37e, 04:01:01:38e, 04:01:01:39e,<br>04:01:01:40e, 04:01:01:41e, 04:01:01:42e,<br>04:01:01:43e, 04:01:01:44e, 04:01:01:45e,<br>04:01:01:46e, 04:01:01:47e, 04:01:01:48e,<br>04:01:01:49e, 04:01:01:50e, 04:01:01:51e,<br>04:01:01:52e, 04:01:01:53e, 04:01:02e,<br>04:01:03e, 04:01:04:01e, 04:01:04:02e,<br>04:01:05e, 04:01:06e, 04:01:07e, 04:01:08e,<br>04:01:09e, 04:01:10e, 04:01:11e, 04:01:12e,<br>04:01:13e, 04:01:14e, 04:01:15e, 04:01:16e,<br>04:01:17e, 04:01:18e, 04:01:19e, 04:01:20e,<br>04:01:21e, 04:01:22e, 04:01:23e, 04:01:24e,<br>04:01:25e, 04:01:26e, 04:01:27e, 04:01:28e,<br>04:01:29e, 04:01:30e, 04:01:31e, 04:01:32e,<br>04:01:33e, 04:01:34e, 04:01:35e, 04:01:36e,<br>04:01:37:01e, 04:01:37:02e, 04:01:38e,<br>04:01:39:01e, 04:01:39:02e, 04:01:40e,<br>04:01:41e, 04:01:42e, 04:01:43e, 04:01:44e,<br>04:01:45e, 04:01:46e, 04:01:47e, 04:01:48e,<br>04:01:49e, 04:01:50e / DPB1* 213:01:01e,<br>213:01:02e / DPB1* 334:01:01e, 334:01:02e /<br>DPB1* 350:01e / DPB1* 415:01e / DPB1*<br>459:01e / DPB1* 464:01e / DPB1*<br>523:01:01e, 523:01:02e / DPB1* 534:01e /<br>DPB1* 615:01e / DPB1* 618:01e / DPB1*<br>670:01e / DPB1* 677:01e / DPB1* 699:01e /<br>DPB1* 755:01e / DPB1* 757:01e / DPB1*<br>765:01e / DPB1* 767:01e / DPB1* 784:01e /<br>DPB1* 804:01e / DPB1* 806:01:01:01e,<br>806:01:01:02e / DPB1* 813:01e / DPB1*<br>820:01e / DPB1* 824:01:01e, 824:01:02e /<br>DPB1* 826:01e / DPB1* 850:01e / DPB1*<br>859:01e / DPB1* 880:01e / DPB1* 882:01e /<br>DPB1* 926:01e / DPB1* 932:01e / DPB1*<br>939:01e / DPB1* 978:01e / DPB1* 988:01e /<br>DPB1* 989:01e / DPB1* 992:01e / DPB1*<br>997:01e / DPB1* 1001:01e / DPB1*<br>1002:01e / DPB1* 1003:01e / DPB1*<br>1004:01e / DPB1* 1010:01e / DPB1*<br>1011:01e / DPB1* 1023:01e / DPB1*<br>1033:01e / DPB1* 1074:01e / DPB1*<br>1086:01e / DPB1* 1091:01e / DPB1* | 04:01P<br>213:01P<br>334:01P<br>523:01P | LFQG  | EEFA  | AAE   | ILEEK | M     | GGPM  |

1100:01e / DPB1\* 1129:01e / DPB1\*  
 1132:01e / DPB1\* 1146:01e / DPB1\*  
 1148:01e / DPB1\* 1152:01e / DPB1\*  
 1155:01e / DPB1\* 1161:01e / DPB1\*  
 1164:01e

DPB1\* 04:01:01:24Ne / DPB1\* 99:01e /  
 DPB1\* 120:01Ne / DPB1\* 121:01e / DPB1\*  
 128:01e / DPB1\* 134:01e / DPB1\* 149:01e /  
 DPB1\* 169:01e / DPB1\* 174:01e / DPB1\*  
 175:01e / DPB1\* 180:01e / DPB1\* 181:01e /  
 DPB1\* 192:01e / DPB1\* 193:01e / DPB1\*  
 194:01e / DPB1\* 195:01e / DPB1\* 212:01e /  
 DPB1\* 224:01e / DPB1\* 225:01e / DPB1\*  
 228:01e / DPB1\* 231:01e / DPB1\* 232:01e /  
 DPB1\* 240:01e / DPB1\* 253:01e / DPB1\*  
 255:01e / DPB1\* 262:01e / DPB1\* 272:01e /  
 DPB1\* 275:01e / DPB1\* 276:01e / DPB1\*  
 281:01e / DPB1\* 282:01e / DPB1\* 283:01e /  
 DPB1\* 298:01e / DPB1\* 320:01e / DPB1\*  
 323:01e / DPB1\* 335:01e / DPB1\* 336:01e /  
 DPB1\* 341:01e / DPB1\* 356:01e / DPB1\*  
 360:01e / DPB1\* 372:01e / DPB1\* 376:01e /  
 DPB1\* 378:01e / DPB1\* 396:01e / DPB1\*  
 397:01e / DPB1\* 418:01e / DPB1\* 425:01e /  
 DPB1\* 426:01e / DPB1\* 428:01e / DPB1\*  
 434:01e / DPB1\* 453:01e / DPB1\* 455:01Ne /  
 DPB1\* 465:01e / DPB1\* 468:01e / DPB1\*  
 475:01e / DPB1\* 476:01e / DPB1\* 479:01e /  
 DPB1\* 485:01e / DPB1\* 486:01e / DPB1\*  
 487:01e / DPB1\* 497:01e / DPB1\* 500:01e /  
 DPB1\* 520:01e / DPB1\* 521:01e / DPB1\*  
 522:01e / DPB1\* 524:01e / DPB1\* 529:01e /  
 DPB1\* 553:01e / DPB1\* 554:01e / DPB1\*  
 556:01e / DPB1\* 559:01e / DPB1\* 569:01e /  
 DPB1\* 575:01e / DPB1\* 578:01e / DPB1\*  
 583:01e / DPB1\* 591:01e / DPB1\* 593:01e /  
 DPB1\* 607:01e / DPB1\* 614:01e / DPB1\*  
 625:01e / DPB1\* 643:01e / DPB1\* 658:01e /  
 DPB1\* 666:01e / DPB1\* 682:01e / DPB1\*  
 683:01e / DPB1\* 694:01e / DPB1\* 722:01e /  
 DPB1\* 739:01e / DPB1\* 742:01e / DPB1\*  
 750:01e / DPB1\* 754:01Ne / DPB1\*  
 756:01Ne / DPB1\* 758:01e / DPB1\* 761:01e /  
 DPB1\* 769:01e / DPB1\* 772:01e / DPB1\*  
 773:01e / DPB1\* 788:01e / DPB1\* 795:01e /  
 DPB1\* 803:01e / DPB1\* 808:01e / DPB1\*  
 811:01e / DPB1\* 812:01e / DPB1\* 814:01e /  
 DPB1\* 837:01e / DPB1\* 842:01e / DPB1\*  
 852:01e / DPB1\* 878:01Ne / DPB1\* 895:01e /  
 DPB1\* 915:01e / DPB1\* 957:01e / DPB1\*  
 966:01e / DPB1\* 974:01Ne / DPB1\* 993:01e /  
 DPB1\* 1040:01e / DPB1\* 1042:01e / DPB1\*  
 1048:01e / DPB1\* 1060:01e / DPB1\*  
 1062:01e / DPB1\* 1064:01e / DPB1\*  
 1066:01e / DPB1\* 1108:01e / DPB1\*  
 1112:01Ne / DPB1\* 1113:01e / DPB1\*  
 1121:01Ne / DPB1\* 1139:01e / DPB1\*  
 1167:01e

-

**EDP230**

DPB1\* 230:01e

-

LFQG

EEFA

AAE

ILEEK

M

**GWPM**

1 rare

*One side of this epitype requires a RARE allele, review results to confirm assignment.*

OR

| EPITYPE                       | ALLELES                                                                                                                                                                                                                                                                                                                                                                                                                                                                                                                                                                                                                                                                                                                                                                                                                                                                                                                                                                                                                                                                                                                                                                                                                                                                                                                                                                                                                                                                                                                                                                                                                                                                                                                                                                                                                                                                                                                                                                                                                                                                                                                                                                                                                                                                                                                                                                                                                                                                                                                                                                                               | P GROUP                                 | HVR-A | HVR-B | HVR-C | HVR-D | HVR-E | HVR-F |
|-------------------------------|-------------------------------------------------------------------------------------------------------------------------------------------------------------------------------------------------------------------------------------------------------------------------------------------------------------------------------------------------------------------------------------------------------------------------------------------------------------------------------------------------------------------------------------------------------------------------------------------------------------------------------------------------------------------------------------------------------------------------------------------------------------------------------------------------------------------------------------------------------------------------------------------------------------------------------------------------------------------------------------------------------------------------------------------------------------------------------------------------------------------------------------------------------------------------------------------------------------------------------------------------------------------------------------------------------------------------------------------------------------------------------------------------------------------------------------------------------------------------------------------------------------------------------------------------------------------------------------------------------------------------------------------------------------------------------------------------------------------------------------------------------------------------------------------------------------------------------------------------------------------------------------------------------------------------------------------------------------------------------------------------------------------------------------------------------------------------------------------------------------------------------------------------------------------------------------------------------------------------------------------------------------------------------------------------------------------------------------------------------------------------------------------------------------------------------------------------------------------------------------------------------------------------------------------------------------------------------------------------------|-----------------------------------------|-------|-------|-------|-------|-------|-------|
| EDP04<br>1 common<br>291 rare | <b>DPB1* 04:01:01:01</b> , 04:01:01:02e,<br>04:01:01:03e, 04:01:01:04e, 04:01:01:05e,<br>04:01:01:06e, 04:01:01:07e, 04:01:01:08e,<br>04:01:01:09e, 04:01:01:10e, 04:01:01:11e,<br>04:01:01:12e, 04:01:01:13e, 04:01:01:14e,<br>04:01:01:15e, 04:01:01:16e, 04:01:01:17e,<br>04:01:01:18e, 04:01:01:19e, 04:01:01:20e,<br>04:01:01:21e, 04:01:01:22e, 04:01:01:23e,<br>04:01:01:25e, 04:01:01:26e, 04:01:01:27e,<br>04:01:01:28e, 04:01:01:29e, 04:01:01:30e,<br>04:01:01:31e, 04:01:01:32e, 04:01:01:33e,<br>04:01:01:34e, 04:01:01:35e, 04:01:01:36e,<br>04:01:01:37e, 04:01:01:38e, 04:01:01:39e,<br>04:01:01:40e, 04:01:01:41e, 04:01:01:42e,<br>04:01:01:43e, 04:01:01:44e, 04:01:01:45e,<br>04:01:01:46e, 04:01:01:47e, 04:01:01:48e,<br>04:01:01:49e, 04:01:01:50e, 04:01:01:51e,<br>04:01:01:52e, 04:01:01:53e, 04:01:02e,<br>04:01:03e, 04:01:04:01e, 04:01:04:02e,<br>04:01:05e, 04:01:06e, 04:01:07e, 04:01:08e,<br>04:01:09e, 04:01:10e, 04:01:11e, 04:01:12e,<br>04:01:13e, 04:01:14e, 04:01:15e, 04:01:16e,<br>04:01:17e, 04:01:18e, 04:01:19e, 04:01:20e,<br>04:01:21e, 04:01:22e, 04:01:23e, 04:01:24e,<br>04:01:25e, 04:01:26e, 04:01:27e, 04:01:28e,<br>04:01:29e, 04:01:30e, 04:01:31e, 04:01:32e,<br>04:01:33e, 04:01:34e, 04:01:35e, 04:01:36e,<br>04:01:37:01e, 04:01:37:02e, 04:01:38e,<br>04:01:39:01e, 04:01:39:02e, 04:01:40e,<br>04:01:41e, 04:01:42e, 04:01:43e, 04:01:44e,<br>04:01:45e, 04:01:46e, 04:01:47e, 04:01:48e,<br>04:01:49e, 04:01:50e / DPB1* 213:01:01e,<br>213:01:02e / DPB1* 334:01:01e, 334:01:02e /<br>DPB1* 350:01e / DPB1* 415:01e / DPB1*<br>459:01e / DPB1* 464:01e / DPB1*<br>523:01:01e, 523:01:02e / DPB1* 534:01e /<br>DPB1* 615:01e / DPB1* 618:01e / DPB1*<br>670:01e / DPB1* 677:01e / DPB1* 699:01e /<br>DPB1* 755:01e / DPB1* 757:01e / DPB1*<br>765:01e / DPB1* 767:01e / DPB1* 784:01e /<br>DPB1* 804:01e / DPB1* 806:01:01:01e,<br>806:01:01:02e / DPB1* 813:01e / DPB1*<br>820:01e / DPB1* 824:01:01e, 824:01:02e /<br>DPB1* 826:01e / DPB1* 850:01e / DPB1*<br>859:01e / DPB1* 880:01e / DPB1* 882:01e /<br>DPB1* 926:01e / DPB1* 932:01e / DPB1*<br>939:01e / DPB1* 978:01e / DPB1* 988:01e /<br>DPB1* 989:01e / DPB1* 992:01e / DPB1*<br>997:01e / DPB1* 1001:01e / DPB1*<br>1002:01e / DPB1* 1003:01e / DPB1*<br>1004:01e / DPB1* 1010:01e / DPB1*<br>1011:01e / DPB1* 1023:01e / DPB1*<br>1033:01e / DPB1* 1074:01e / DPB1*<br>1086:01e / DPB1* 1091:01e / DPB1*<br>1100:01e / DPB1* 1129:01e / DPB1*<br>1132:01e / DPB1* 1146:01e / DPB1*<br>1148:01Qe / DPB1* 1152:01e / DPB1*<br>1155:01e / DPB1* 1161:01e / DPB1*<br>1164:01e | 04:01P<br>213:01P<br>334:01P<br>523:01P | LFQG  | EEFA  | AAE   | ILEEK | M     | GGPM  |

DPB1\* 04:01:01:24Ne / DPB1\* 99:01e /  
 DPB1\* 120:01Ne / DPB1\* 121:01e / DPB1\*  
 128:01e / DPB1\* 134:01e / DPB1\* 149:01e /  
 DPB1\* 169:01e / DPB1\* 174:01e / DPB1\*  
 175:01e / DPB1\* 180:01e / DPB1\* 181:01e /  
 DPB1\* 192:01e / DPB1\* 193:01e / DPB1\*  
 194:01e / DPB1\* 195:01e / DPB1\* 212:01e /  
 DPB1\* 224:01e / DPB1\* 225:01e / DPB1\*  
 228:01e / DPB1\* 231:01e / DPB1\* 232:01e /  
 DPB1\* 240:01e / DPB1\* 253:01e / DPB1\*  
 255:01e / DPB1\* 262:01e / DPB1\* 272:01e /  
 DPB1\* 275:01e / DPB1\* 276:01e / DPB1\*  
 281:01e / DPB1\* 282:01e / DPB1\* 283:01e /  
 DPB1\* 298:01e / DPB1\* 320:01e / DPB1\*  
 323:01e / DPB1\* 335:01e / DPB1\* 336:01e /  
 DPB1\* 341:01e / DPB1\* 356:01e / DPB1\*  
 360:01e / DPB1\* 372:01e / DPB1\* 376:01e /  
 DPB1\* 378:01e / DPB1\* 396:01e / DPB1\*  
 397:01e / DPB1\* 418:01e / DPB1\* 425:01e /  
 DPB1\* 426:01e / DPB1\* 428:01e / DPB1\*  
 434:01e / DPB1\* 453:01e / DPB1\* 455:01Ne /  
 DPB1\* 465:01e / DPB1\* 468:01e / DPB1\*  
 475:01e / DPB1\* 476:01e / DPB1\* 479:01e /  
 DPB1\* 485:01e / DPB1\* 486:01e / DPB1\*  
 487:01e / DPB1\* 497:01e / DPB1\* 500:01e /  
 DPB1\* 520:01e / DPB1\* 521:01e / DPB1\*  
 522:01e / DPB1\* 524:01e / DPB1\* 529:01e /  
 DPB1\* 553:01e / DPB1\* 554:01e / DPB1\*  
 556:01e / DPB1\* 559:01e / DPB1\* 569:01e /  
 DPB1\* 575:01e / DPB1\* 578:01e / DPB1\*  
 583:01e / DPB1\* 591:01e / DPB1\* 593:01e /  
 DPB1\* 607:01e / DPB1\* 614:01e / DPB1\*  
 625:01e / DPB1\* 643:01e / DPB1\* 658:01e /  
 DPB1\* 666:01e / DPB1\* 682:01e / DPB1\*  
 683:01e / DPB1\* 694:01e / DPB1\* 722:01e /  
 DPB1\* 739:01e / DPB1\* 742:01e / DPB1\*  
 750:01e / DPB1\* 754:01Ne / DPB1\*  
 756:01Ne / DPB1\* 758:01e / DPB1\* 761:01e /  
 DPB1\* 769:01e / DPB1\* 772:01e / DPB1\*  
 773:01e / DPB1\* 788:01e / DPB1\* 795:01e /  
 DPB1\* 803:01e / DPB1\* 808:01e / DPB1\*  
 811:01e / DPB1\* 812:01e / DPB1\* 814:01e /  
 DPB1\* 837:01e / DPB1\* 842:01e / DPB1\*  
 852:01e / DPB1\* 878:01Ne / DPB1\* 895:01e /  
 DPB1\* 915:01e / DPB1\* 957:01e / DPB1\*  
 966:01e / DPB1\* 974:01Ne / DPB1\* 993:01e /  
 DPB1\* 1040:01e / DPB1\* 1042:01e / DPB1\*  
 1048:01e / DPB1\* 1060:01e / DPB1\*  
 1062:01e / DPB1\* 1064:01e / DPB1\*  
 1066:01e / DPB1\* 1108:01e / DPB1\*  
 1112:01Ne / DPB1\* 1113:01e / DPB1\*  
 1121:01Ne / DPB1\* 1139:01e / DPB1\*  
 1167:01e

-

**EDP570**

DPB1\* 911:01Ne

-

-

-

-

-

-

-

1 rare

*One side of this epitope requires a RARE allele, review results to confirm assignment.*

OR

| EPITYPE | ALLELES | P GROUP | HVR-A | HVR-B | HVR-C | HVR-D | HVR-E | HVR-F |
|---------|---------|---------|-------|-------|-------|-------|-------|-------|
|---------|---------|---------|-------|-------|-------|-------|-------|-------|

|                                                  |                                                                                                                                                                                                                                                                                                                                                                                                                                                                                                                                                                                                                                                                                                                                                                                                                                                                                                                                                                                                                                                                                                                                                                                                                                                                                                                                                                                                                                                                                                                                                                                                                                                                                                                                                                                                                                                                                                                                                                                                                                                                                                                                                                                                                                                                                                                                                                                                                                                                                                                                                                                                                                                                                                                                                                                                                                                                                                                                              |                                                            |             |             |            |              |          |             |
|--------------------------------------------------|----------------------------------------------------------------------------------------------------------------------------------------------------------------------------------------------------------------------------------------------------------------------------------------------------------------------------------------------------------------------------------------------------------------------------------------------------------------------------------------------------------------------------------------------------------------------------------------------------------------------------------------------------------------------------------------------------------------------------------------------------------------------------------------------------------------------------------------------------------------------------------------------------------------------------------------------------------------------------------------------------------------------------------------------------------------------------------------------------------------------------------------------------------------------------------------------------------------------------------------------------------------------------------------------------------------------------------------------------------------------------------------------------------------------------------------------------------------------------------------------------------------------------------------------------------------------------------------------------------------------------------------------------------------------------------------------------------------------------------------------------------------------------------------------------------------------------------------------------------------------------------------------------------------------------------------------------------------------------------------------------------------------------------------------------------------------------------------------------------------------------------------------------------------------------------------------------------------------------------------------------------------------------------------------------------------------------------------------------------------------------------------------------------------------------------------------------------------------------------------------------------------------------------------------------------------------------------------------------------------------------------------------------------------------------------------------------------------------------------------------------------------------------------------------------------------------------------------------------------------------------------------------------------------------------------------------|------------------------------------------------------------|-------------|-------------|------------|--------------|----------|-------------|
| <p><b>EDP04</b></p> <p>1 common<br/>291 rare</p> | <p><b>DPB1* 04:01:01:01</b>, 04:01:01:02e,<br/>04:01:01:03e, 04:01:01:04e, 04:01:01:05e,<br/>04:01:01:06e, 04:01:01:07e, 04:01:01:08e,<br/>04:01:01:09e, 04:01:01:10e, 04:01:01:11e,<br/>04:01:01:12e, 04:01:01:13e, 04:01:01:14e,<br/>04:01:01:15e, 04:01:01:16e, 04:01:01:17e,<br/>04:01:01:18e, 04:01:01:19e, 04:01:01:20e,<br/>04:01:01:21e, 04:01:01:22e, 04:01:01:23e,<br/>04:01:01:25e, 04:01:01:26e, 04:01:01:27e,<br/>04:01:01:28e, 04:01:01:29e, 04:01:01:30e,<br/>04:01:01:31e, 04:01:01:32e, 04:01:01:33e,<br/>04:01:01:34e, 04:01:01:35e, 04:01:01:36e,<br/>04:01:01:37e, 04:01:01:38e, 04:01:01:39e,<br/>04:01:01:40e, 04:01:01:41e, 04:01:01:42e,<br/>04:01:01:43e, 04:01:01:44e, 04:01:01:45e,<br/>04:01:01:46e, 04:01:01:47e, 04:01:01:48e,<br/>04:01:01:49e, 04:01:01:50e, 04:01:01:51e,<br/>04:01:01:52e, 04:01:01:53e, 04:01:02e,<br/>04:01:03e, 04:01:04:01e, 04:01:04:02e,<br/>04:01:05e, 04:01:06e, 04:01:07e, 04:01:08e,<br/>04:01:09e, 04:01:10e, 04:01:11e, 04:01:12e,<br/>04:01:13e, 04:01:14e, 04:01:15e, 04:01:16e,<br/>04:01:17e, 04:01:18e, 04:01:19e, 04:01:20e,<br/>04:01:21e, 04:01:22e, 04:01:23e, 04:01:24e,<br/>04:01:25e, 04:01:26e, 04:01:27e, 04:01:28e,<br/>04:01:29e, 04:01:30e, 04:01:31e, 04:01:32e,<br/>04:01:33e, 04:01:34e, 04:01:35e, 04:01:36e,<br/>04:01:37:01e, 04:01:37:02e, 04:01:38e,<br/>04:01:39:01e, 04:01:39:02e, 04:01:40e,<br/>04:01:41e, 04:01:42e, 04:01:43e, 04:01:44e,<br/>04:01:45e, 04:01:46e, 04:01:47e, 04:01:48e,<br/>04:01:49e, 04:01:50e / DPB1* 213:01:01e,<br/>213:01:02e / DPB1* 334:01:01e, 334:01:02e /<br/>DPB1* 350:01e / DPB1* 415:01e / DPB1*<br/>459:01e / DPB1* 464:01e / DPB1*<br/>523:01:01e, 523:01:02e / DPB1* 534:01e /<br/>DPB1* 615:01e / DPB1* 618:01e / DPB1*<br/>670:01e / DPB1* 677:01e / DPB1* 699:01e /<br/>DPB1* 755:01e / DPB1* 757:01e / DPB1*<br/>765:01e / DPB1* 767:01e / DPB1* 784:01e /<br/>DPB1* 804:01e / DPB1* 806:01:01:01e,<br/>806:01:01:02e / DPB1* 813:01e / DPB1*<br/>820:01e / DPB1* 824:01:01e, 824:01:02e /<br/>DPB1* 826:01e / DPB1* 850:01e / DPB1*<br/>859:01e / DPB1* 880:01e / DPB1* 882:01e /<br/>DPB1* 926:01e / DPB1* 932:01e / DPB1*<br/>939:01e / DPB1* 978:01e / DPB1* 988:01e /<br/>DPB1* 989:01e / DPB1* 992:01e / DPB1*<br/>997:01e / DPB1* 1001:01e / DPB1*<br/>1002:01e / DPB1* 1003:01e / DPB1*<br/>1004:01e / DPB1* 1010:01e / DPB1*<br/>1011:01e / DPB1* 1023:01e / DPB1*<br/>1033:01e / DPB1* 1074:01e / DPB1*<br/>1086:01e / DPB1* 1091:01e / DPB1*<br/>1100:01e / DPB1* 1129:01e / DPB1*<br/>1132:01e / DPB1* 1146:01e / DPB1*<br/>1148:01Qe / DPB1* 1152:01e / DPB1*<br/>1155:01e / DPB1* 1161:01e / DPB1*<br/>1164:01e</p> <p>DPB1* 04:01:01:24Ne / DPB1* 99:01e /<br/>DPB1* 120:01Ne / DPB1* 121:01e / DPB1*<br/>128:01e / DPB1* 134:01e / DPB1* 149:01e /<br/>DPB1* 169:01e / DPB1* 174:01e / DPB1*<br/>175:01e / DPB1* 180:01e / DPB1* 181:01e /<br/>DPB1* 192:01e / DPB1* 193:01e / DPB1*</p> | <p>04:01P<br/>213:01P<br/>334:01P<br/>523:01P</p> <p>-</p> | <p>LFQG</p> | <p>EEFA</p> | <p>AAE</p> | <p>ILEEK</p> | <p>M</p> | <p>GGPM</p> |
|--------------------------------------------------|----------------------------------------------------------------------------------------------------------------------------------------------------------------------------------------------------------------------------------------------------------------------------------------------------------------------------------------------------------------------------------------------------------------------------------------------------------------------------------------------------------------------------------------------------------------------------------------------------------------------------------------------------------------------------------------------------------------------------------------------------------------------------------------------------------------------------------------------------------------------------------------------------------------------------------------------------------------------------------------------------------------------------------------------------------------------------------------------------------------------------------------------------------------------------------------------------------------------------------------------------------------------------------------------------------------------------------------------------------------------------------------------------------------------------------------------------------------------------------------------------------------------------------------------------------------------------------------------------------------------------------------------------------------------------------------------------------------------------------------------------------------------------------------------------------------------------------------------------------------------------------------------------------------------------------------------------------------------------------------------------------------------------------------------------------------------------------------------------------------------------------------------------------------------------------------------------------------------------------------------------------------------------------------------------------------------------------------------------------------------------------------------------------------------------------------------------------------------------------------------------------------------------------------------------------------------------------------------------------------------------------------------------------------------------------------------------------------------------------------------------------------------------------------------------------------------------------------------------------------------------------------------------------------------------------------------|------------------------------------------------------------|-------------|-------------|------------|--------------|----------|-------------|



194:01e / DPB1\* 195:01e / DPB1\* 212:01e /  
 DPB1\* 224:01e / DPB1\* 225:01e / DPB1\*  
 228:01e / DPB1\* 231:01e / DPB1\* 232:01e /  
 DPB1\* 240:01e / DPB1\* 253:01e / DPB1\*  
 255:01e / DPB1\* 262:01e / DPB1\* 272:01e /  
 DPB1\* 275:01e / DPB1\* 276:01e / DPB1\*  
 281:01e / DPB1\* 282:01e / DPB1\* 283:01e /  
 DPB1\* 298:01e / DPB1\* 320:01e / DPB1\*  
 323:01e / DPB1\* 335:01e / DPB1\* 336:01e /  
 DPB1\* 341:01e / DPB1\* 356:01e / DPB1\*  
 360:01e / DPB1\* 372:01e / DPB1\* 376:01e /  
 DPB1\* 378:01e / DPB1\* 396:01e / DPB1\*  
 397:01e / DPB1\* 418:01e / DPB1\* 425:01e /  
 DPB1\* 426:01e / DPB1\* 428:01e / DPB1\*  
 434:01e / DPB1\* 453:01e / DPB1\* 455:01Ne /  
 DPB1\* 465:01e / DPB1\* 468:01e / DPB1\*  
 475:01e / DPB1\* 476:01e / DPB1\* 479:01e /  
 DPB1\* 485:01e / DPB1\* 486:01e / DPB1\*  
 487:01e / DPB1\* 497:01e / DPB1\* 500:01e /  
 DPB1\* 520:01e / DPB1\* 521:01e / DPB1\*  
 522:01e / DPB1\* 524:01e / DPB1\* 529:01e /  
 DPB1\* 553:01e / DPB1\* 554:01e / DPB1\*  
 556:01e / DPB1\* 559:01e / DPB1\* 569:01e /  
 DPB1\* 575:01e / DPB1\* 578:01e / DPB1\*  
 583:01e / DPB1\* 591:01e / DPB1\* 593:01e /  
 DPB1\* 607:01e / DPB1\* 614:01e / DPB1\*  
 625:01e / DPB1\* 643:01e / DPB1\* 658:01e /  
 DPB1\* 666:01e / DPB1\* 682:01e / DPB1\*  
 683:01e / DPB1\* 694:01e / DPB1\* 722:01e /  
 DPB1\* 739:01e / DPB1\* 742:01e / DPB1\*  
 750:01e / DPB1\* 754:01Ne / DPB1\*  
 756:01Ne / DPB1\* 758:01e / DPB1\* 761:01e /  
 DPB1\* 769:01e / DPB1\* 772:01e / DPB1\*  
 773:01e / DPB1\* 788:01e / DPB1\* 795:01e /  
 DPB1\* 803:01e / DPB1\* 808:01e / DPB1\*  
 811:01e / DPB1\* 812:01e / DPB1\* 814:01e /  
 DPB1\* 837:01e / DPB1\* 842:01e / DPB1\*  
 852:01e / DPB1\* 878:01Ne / DPB1\* 895:01e /  
 DPB1\* 915:01e / DPB1\* 957:01e / DPB1\*  
 966:01e / DPB1\* 974:01Ne / DPB1\* 993:01e /  
 DPB1\* 1040:01e / DPB1\* 1042:01e / DPB1\*  
 1048:01e / DPB1\* 1060:01e / DPB1\*  
 1062:01e / DPB1\* 1064:01e / DPB1\*  
 1066:01e / DPB1\* 1108:01e / DPB1\*  
 1112:01Ne / DPB1\* 1113:01e / DPB1\*  
 1121:01Ne / DPB1\* 1139:01e / DPB1\*  
 1167:01e

**EDP840**

DPB1\* 840:01e

-

IFQG

EEFA

AAE

ILEEK

M

GGPM

1 rare

*One side of this epitope requires a RARE allele, review results to confirm assignment.*

OR

| EPITYPE                              | ALLELES                                                                                                                                                                                                                                                           | P GROUP                                 | HVR-A | HVR-B | HVR-C | HVR-D | HVR-E | HVR-F |
|--------------------------------------|-------------------------------------------------------------------------------------------------------------------------------------------------------------------------------------------------------------------------------------------------------------------|-----------------------------------------|-------|-------|-------|-------|-------|-------|
| <b>EDP04</b><br>1 common<br>291 rare | DPB1* 04:01:01:01, 04:01:01:02e,<br>04:01:01:03e, 04:01:01:04e, 04:01:01:05e,<br>04:01:01:06e, 04:01:01:07e, 04:01:01:08e,<br>04:01:01:09e, 04:01:01:10e, 04:01:01:11e,<br>04:01:01:12e, 04:01:01:13e, 04:01:01:14e,<br>04:01:01:15e, 04:01:01:16e, 04:01:01:17e, | 04:01P<br>213:01P<br>334:01P<br>523:01P | LFQG  | EEFA  | AAE   | ILEEK | M     | GGPM  |

04:01:01:18e, 04:01:01:19e, 04:01:01:20e,  
04:01:01:21e, 04:01:01:22e, 04:01:01:23e,  
04:01:01:25e, 04:01:01:26e, 04:01:01:27e,  
04:01:01:28e, 04:01:01:29e, 04:01:01:30e,  
04:01:01:31e, 04:01:01:32e, 04:01:01:33e,  
04:01:01:34e, 04:01:01:35e, 04:01:01:36e,  
04:01:01:37e, 04:01:01:38e, 04:01:01:39e,  
04:01:01:40e, 04:01:01:41e, 04:01:01:42e,  
04:01:01:43e, 04:01:01:44e, 04:01:01:45e,  
04:01:01:46e, 04:01:01:47e, 04:01:01:48e,  
04:01:01:49e, 04:01:01:50e, 04:01:01:51e,  
04:01:01:52e, 04:01:01:53e, 04:01:02e,  
04:01:03e, 04:01:04:01e, 04:01:04:02e,  
04:01:05e, 04:01:06e, 04:01:07e, 04:01:08e,  
04:01:09e, 04:01:10e, 04:01:11e, 04:01:12e,  
04:01:13e, 04:01:14e, 04:01:15e, 04:01:16e,  
04:01:17e, 04:01:18e, 04:01:19e, 04:01:20e,  
04:01:21e, 04:01:22e, 04:01:23e, 04:01:24e,  
04:01:25e, 04:01:26e, 04:01:27e, 04:01:28e,  
04:01:29e, 04:01:30e, 04:01:31e, 04:01:32e,  
04:01:33e, 04:01:34e, 04:01:35e, 04:01:36e,  
04:01:37:01e, 04:01:37:02e, 04:01:38e,  
04:01:39:01e, 04:01:39:02e, 04:01:40e,  
04:01:41e, 04:01:42e, 04:01:43e, 04:01:44e,  
04:01:45e, 04:01:46e, 04:01:47e, 04:01:48e,  
04:01:49e, 04:01:50e / DPB1\* 213:01:01e,  
213:01:02e / DPB1\* 334:01:01e, 334:01:02e /  
DPB1\* 350:01e / DPB1\* 415:01e / DPB1\*  
459:01e / DPB1\* 464:01e / DPB1\*  
523:01:01e, 523:01:02e / DPB1\* 534:01e /  
DPB1\* 615:01e / DPB1\* 618:01e / DPB1\*  
670:01e / DPB1\* 677:01e / DPB1\* 699:01e /  
DPB1\* 755:01e / DPB1\* 757:01e / DPB1\*  
765:01e / DPB1\* 767:01e / DPB1\* 784:01e /  
DPB1\* 804:01e / DPB1\* 806:01:01:01e,  
806:01:01:02e / DPB1\* 813:01e / DPB1\*  
820:01e / DPB1\* 824:01:01e, 824:01:02e /  
DPB1\* 826:01e / DPB1\* 850:01e / DPB1\*  
859:01e / DPB1\* 880:01e / DPB1\* 882:01e /  
DPB1\* 926:01e / DPB1\* 932:01e / DPB1\*  
939:01e / DPB1\* 978:01e / DPB1\* 988:01e /  
DPB1\* 989:01e / DPB1\* 992:01e / DPB1\*  
997:01e / DPB1\* 1001:01e / DPB1\*  
1002:01e / DPB1\* 1003:01e / DPB1\*  
1004:01e / DPB1\* 1010:01e / DPB1\*  
1011:01e / DPB1\* 1023:01e / DPB1\*  
1033:01e / DPB1\* 1074:01e / DPB1\*  
1086:01e / DPB1\* 1091:01e / DPB1\*  
1100:01e / DPB1\* 1129:01e / DPB1\*  
1132:01e / DPB1\* 1146:01e / DPB1\*  
1148:01Qe / DPB1\* 1152:01e / DPB1\*  
1155:01e / DPB1\* 1161:01e / DPB1\*  
1164:01e

DPB1\* 04:01:01:24Ne / DPB1\* 99:01e /  
DPB1\* 120:01Ne / DPB1\* 121:01e / DPB1\*  
128:01e / DPB1\* 134:01e / DPB1\* 149:01e /  
DPB1\* 169:01e / DPB1\* 174:01e / DPB1\*  
175:01e / DPB1\* 180:01e / DPB1\* 181:01e /  
DPB1\* 192:01e / DPB1\* 193:01e / DPB1\*  
194:01e / DPB1\* 195:01e / DPB1\* 212:01e /  
DPB1\* 224:01e / DPB1\* 225:01e / DPB1\*  
228:01e / DPB1\* 231:01e / DPB1\* 232:01e /  
DPB1\* 240:01e / DPB1\* 253:01e / DPB1\*  
255:01e / DPB1\* 262:01e / DPB1\* 272:01e /  
DPB1\* 275:01e / DPB1\* 276:01e / DPB1\*

-

281:01e / DPB1\* 282:01e / DPB1\* 283:01e /  
 DPB1\* 298:01e / DPB1\* 320:01e / DPB1\*  
 323:01e / DPB1\* 335:01e / DPB1\* 336:01e /  
 DPB1\* 341:01e / DPB1\* 356:01e / DPB1\*  
 360:01e / DPB1\* 372:01e / DPB1\* 376:01e /  
 DPB1\* 378:01e / DPB1\* 396:01e / DPB1\*  
 397:01e / DPB1\* 418:01e / DPB1\* 425:01e /  
 DPB1\* 426:01e / DPB1\* 428:01e / DPB1\*  
 434:01e / DPB1\* 453:01e / DPB1\* 455:01Ne /  
 DPB1\* 465:01e / DPB1\* 468:01e / DPB1\*  
 475:01e / DPB1\* 476:01e / DPB1\* 479:01e /  
 DPB1\* 485:01e / DPB1\* 486:01e / DPB1\*  
 487:01e / DPB1\* 497:01e / DPB1\* 500:01e /  
 DPB1\* 520:01e / DPB1\* 521:01e / DPB1\*  
 522:01e / DPB1\* 524:01e / DPB1\* 529:01e /  
 DPB1\* 553:01e / DPB1\* 554:01e / DPB1\*  
 556:01e / DPB1\* 559:01e / DPB1\* 569:01e /  
 DPB1\* 575:01e / DPB1\* 578:01e / DPB1\*  
 583:01e / DPB1\* 591:01e / DPB1\* 593:01e /  
 DPB1\* 607:01e / DPB1\* 614:01e / DPB1\*  
 625:01e / DPB1\* 643:01e / DPB1\* 658:01e /  
 DPB1\* 666:01e / DPB1\* 682:01e / DPB1\*  
 683:01e / DPB1\* 694:01e / DPB1\* 722:01e /  
 DPB1\* 739:01e / DPB1\* 742:01e / DPB1\*  
 750:01e / DPB1\* 754:01Ne / DPB1\*  
 756:01Ne / DPB1\* 758:01e / DPB1\* 761:01e /  
 DPB1\* 769:01e / DPB1\* 772:01e / DPB1\*  
 773:01e / DPB1\* 788:01e / DPB1\* 795:01e /  
 DPB1\* 803:01e / DPB1\* 808:01e / DPB1\*  
 811:01e / DPB1\* 812:01e / DPB1\* 814:01e /  
 DPB1\* 837:01e / DPB1\* 842:01e / DPB1\*  
 852:01e / DPB1\* 878:01Ne / DPB1\* 895:01e /  
 DPB1\* 915:01e / DPB1\* 957:01e / DPB1\*  
 966:01e / DPB1\* 974:01Ne / DPB1\* 993:01e /  
 DPB1\* 1040:01e / DPB1\* 1042:01e / DPB1\*  
 1048:01e / DPB1\* 1060:01e / DPB1\*  
 1062:01e / DPB1\* 1064:01e / DPB1\*  
 1066:01e / DPB1\* 1108:01e / DPB1\*  
 1112:01Ne / DPB1\* 1113:01e / DPB1\*  
 1121:01Ne / DPB1\* 1139:01e / DPB1\*  
 1167:01e

**EDP828**

DPB1\* 828:01e

-

LFQG

DEFA

AAE

ILEEK

M

GGPM

1 rare

*One side of this epitope requires a RARE allele, review results to confirm assignment.*

OR

| EPITYPE                              | ALLELES                                                                                                                                                                                                                                                                                                                                                                                                                                                                                                                                         | P GROUP                                 | HVR-A | HVR-B | HVR-C | HVR-D | HVR-E | HVR-F |
|--------------------------------------|-------------------------------------------------------------------------------------------------------------------------------------------------------------------------------------------------------------------------------------------------------------------------------------------------------------------------------------------------------------------------------------------------------------------------------------------------------------------------------------------------------------------------------------------------|-----------------------------------------|-------|-------|-------|-------|-------|-------|
| <b>EDP04</b><br>1 common<br>291 rare | DPB1* 04:01:01:01, 04:01:01:02e,<br>04:01:01:03e, 04:01:01:04e, 04:01:01:05e,<br>04:01:01:06e, 04:01:01:07e, 04:01:01:08e,<br>04:01:01:09e, 04:01:01:10e, 04:01:01:11e,<br>04:01:01:12e, 04:01:01:13e, 04:01:01:14e,<br>04:01:01:15e, 04:01:01:16e, 04:01:01:17e,<br>04:01:01:18e, 04:01:01:19e, 04:01:01:20e,<br>04:01:01:21e, 04:01:01:22e, 04:01:01:23e,<br>04:01:01:25e, 04:01:01:26e, 04:01:01:27e,<br>04:01:01:28e, 04:01:01:29e, 04:01:01:30e,<br>04:01:01:31e, 04:01:01:32e, 04:01:01:33e,<br>04:01:01:34e, 04:01:01:35e, 04:01:01:36e, | 04:01P<br>213:01P<br>334:01P<br>523:01P | LFQG  | EEFA  | AAE   | ILEEK | M     | GGPM  |

04:01:01:37e, 04:01:01:38e, 04:01:01:39e,  
04:01:01:40e, 04:01:01:41e, 04:01:01:42e,  
04:01:01:43e, 04:01:01:44e, 04:01:01:45e,  
04:01:01:46e, 04:01:01:47e, 04:01:01:48e,  
04:01:01:49e, 04:01:01:50e, 04:01:01:51e,  
04:01:01:52e, 04:01:01:53e, 04:01:02e,  
04:01:03e, 04:01:04:01e, 04:01:04:02e,  
04:01:05e, 04:01:06e, 04:01:07e, 04:01:08e,  
04:01:09e, 04:01:10e, 04:01:11e, 04:01:12e,  
04:01:13e, 04:01:14e, 04:01:15e, 04:01:16e,  
04:01:17e, 04:01:18e, 04:01:19e, 04:01:20e,  
04:01:21e, 04:01:22e, 04:01:23e, 04:01:24e,  
04:01:25e, 04:01:26e, 04:01:27e, 04:01:28e,  
04:01:29e, 04:01:30e, 04:01:31e, 04:01:32e,  
04:01:33e, 04:01:34e, 04:01:35e, 04:01:36e,  
04:01:37:01e, 04:01:37:02e, 04:01:38e,  
04:01:39:01e, 04:01:39:02e, 04:01:40e,  
04:01:41e, 04:01:42e, 04:01:43e, 04:01:44e,  
04:01:45e, 04:01:46e, 04:01:47e, 04:01:48e,  
04:01:49e, 04:01:50e / DPB1\* 213:01:01e,  
213:01:02e / DPB1\* 334:01:01e, 334:01:02e /  
DPB1\* 350:01e / DPB1\* 415:01e / DPB1\*  
459:01e / DPB1\* 464:01e / DPB1\*  
523:01:01e, 523:01:02e / DPB1\* 534:01e /  
DPB1\* 615:01e / DPB1\* 618:01e / DPB1\*  
670:01e / DPB1\* 677:01e / DPB1\* 699:01e /  
DPB1\* 755:01e / DPB1\* 757:01e / DPB1\*  
765:01e / DPB1\* 767:01e / DPB1\* 784:01e /  
DPB1\* 804:01e / DPB1\* 806:01:01:01e,  
806:01:01:02e / DPB1\* 813:01e / DPB1\*  
820:01e / DPB1\* 824:01:01e, 824:01:02e /  
DPB1\* 826:01e / DPB1\* 850:01e / DPB1\*  
859:01e / DPB1\* 880:01e / DPB1\* 882:01e /  
DPB1\* 926:01e / DPB1\* 932:01e / DPB1\*  
939:01e / DPB1\* 978:01e / DPB1\* 988:01e /  
DPB1\* 989:01e / DPB1\* 992:01e / DPB1\*  
997:01e / DPB1\* 1001:01e / DPB1\*  
1002:01e / DPB1\* 1003:01e / DPB1\*  
1004:01e / DPB1\* 1010:01e / DPB1\*  
1011:01e / DPB1\* 1023:01e / DPB1\*  
1033:01e / DPB1\* 1074:01e / DPB1\*  
1086:01e / DPB1\* 1091:01e / DPB1\*  
1100:01e / DPB1\* 1129:01e / DPB1\*  
1132:01e / DPB1\* 1146:01e / DPB1\*  
1148:01Qe / DPB1\* 1152:01e / DPB1\*  
1155:01e / DPB1\* 1161:01e / DPB1\*  
1164:01e

DPB1\* 04:01:01:24Ne / DPB1\* 99:01e /  
DPB1\* 120:01Ne / DPB1\* 121:01e / DPB1\*  
128:01e / DPB1\* 134:01e / DPB1\* 149:01e /  
DPB1\* 169:01e / DPB1\* 174:01e / DPB1\*  
175:01e / DPB1\* 180:01e / DPB1\* 181:01e /  
DPB1\* 192:01e / DPB1\* 193:01e / DPB1\*  
194:01e / DPB1\* 195:01e / DPB1\* 212:01e /  
DPB1\* 224:01e / DPB1\* 225:01e / DPB1\*  
228:01e / DPB1\* 231:01e / DPB1\* 232:01e /  
DPB1\* 240:01e / DPB1\* 253:01e / DPB1\*  
255:01e / DPB1\* 262:01e / DPB1\* 272:01e /  
DPB1\* 275:01e / DPB1\* 276:01e / DPB1\*  
281:01e / DPB1\* 282:01e / DPB1\* 283:01e /  
DPB1\* 298:01e / DPB1\* 320:01e / DPB1\*  
323:01e / DPB1\* 335:01e / DPB1\* 336:01e /  
DPB1\* 341:01e / DPB1\* 356:01e / DPB1\*  
360:01e / DPB1\* 372:01e / DPB1\* 376:01e /  
DPB1\* 378:01e / DPB1\* 396:01e / DPB1\*

-

397:01e / DPB1\* 418:01e / DPB1\* 425:01e /  
 DPB1\* 426:01e / DPB1\* 428:01e / DPB1\*  
 434:01e / DPB1\* 453:01e / DPB1\* 455:01Ne /  
 DPB1\* 465:01e / DPB1\* 468:01e / DPB1\*  
 475:01e / DPB1\* 476:01e / DPB1\* 479:01e /  
 DPB1\* 485:01e / DPB1\* 486:01e / DPB1\*  
 487:01e / DPB1\* 497:01e / DPB1\* 500:01e /  
 DPB1\* 520:01e / DPB1\* 521:01e / DPB1\*  
 522:01e / DPB1\* 524:01e / DPB1\* 529:01e /  
 DPB1\* 553:01e / DPB1\* 554:01e / DPB1\*  
 556:01e / DPB1\* 559:01e / DPB1\* 569:01e /  
 DPB1\* 575:01e / DPB1\* 578:01e / DPB1\*  
 583:01e / DPB1\* 591:01e / DPB1\* 593:01e /  
 DPB1\* 607:01e / DPB1\* 614:01e / DPB1\*  
 625:01e / DPB1\* 643:01e / DPB1\* 658:01e /  
 DPB1\* 666:01e / DPB1\* 682:01e / DPB1\*  
 683:01e / DPB1\* 694:01e / DPB1\* 722:01e /  
 DPB1\* 739:01e / DPB1\* 742:01e / DPB1\*  
 750:01e / DPB1\* 754:01Ne / DPB1\*  
 756:01Ne / DPB1\* 758:01e / DPB1\* 761:01e /  
 DPB1\* 769:01e / DPB1\* 772:01e / DPB1\*  
 773:01e / DPB1\* 788:01e / DPB1\* 795:01e /  
 DPB1\* 803:01e / DPB1\* 808:01e / DPB1\*  
 811:01e / DPB1\* 812:01e / DPB1\* 814:01e /  
 DPB1\* 837:01e / DPB1\* 842:01e / DPB1\*  
 852:01e / DPB1\* 878:01Ne / DPB1\* 895:01e /  
 DPB1\* 915:01e / DPB1\* 957:01e / DPB1\*  
 966:01e / DPB1\* 974:01Ne / DPB1\* 993:01e /  
 DPB1\* 1040:01e / DPB1\* 1042:01e / DPB1\*  
 1048:01e / DPB1\* 1060:01e / DPB1\*  
 1062:01e / DPB1\* 1064:01e / DPB1\*  
 1066:01e / DPB1\* 1108:01e / DPB1\*  
 1112:01Ne / DPB1\* 1113:01e / DPB1\*  
 1121:01Ne / DPB1\* 1139:01e / DPB1\*  
 1167:01e

**EDP318**

DPB1\* 318:01e

-

LFQG

EEFT

AAE

ILEEK

M

GGPM

1 rare

*One side of this epitope requires a RARE allele, review results to confirm assignment.*

OR

| EPITYPE                              | ALLELES                                                                                                                                                                                                                                                                                                                                                                                                                                                                                                                                                                                                                                                                                                                                                                                                                    | P GROUP                                 | HVR-A | HVR-B | HVR-C | HVR-D | HVR-E | HVR-F |
|--------------------------------------|----------------------------------------------------------------------------------------------------------------------------------------------------------------------------------------------------------------------------------------------------------------------------------------------------------------------------------------------------------------------------------------------------------------------------------------------------------------------------------------------------------------------------------------------------------------------------------------------------------------------------------------------------------------------------------------------------------------------------------------------------------------------------------------------------------------------------|-----------------------------------------|-------|-------|-------|-------|-------|-------|
| <b>EDP04</b><br>1 common<br>291 rare | DPB1* 04:01:01:01, 04:01:01:02e,<br>04:01:01:03e, 04:01:01:04e, 04:01:01:05e,<br>04:01:01:06e, 04:01:01:07e, 04:01:01:08e,<br>04:01:01:09e, 04:01:01:10e, 04:01:01:11e,<br>04:01:01:12e, 04:01:01:13e, 04:01:01:14e,<br>04:01:01:15e, 04:01:01:16e, 04:01:01:17e,<br>04:01:01:18e, 04:01:01:19e, 04:01:01:20e,<br>04:01:01:21e, 04:01:01:22e, 04:01:01:23e,<br>04:01:01:25e, 04:01:01:26e, 04:01:01:27e,<br>04:01:01:28e, 04:01:01:29e, 04:01:01:30e,<br>04:01:01:31e, 04:01:01:32e, 04:01:01:33e,<br>04:01:01:34e, 04:01:01:35e, 04:01:01:36e,<br>04:01:01:37e, 04:01:01:38e, 04:01:01:39e,<br>04:01:01:40e, 04:01:01:41e, 04:01:01:42e,<br>04:01:01:43e, 04:01:01:44e, 04:01:01:45e,<br>04:01:01:46e, 04:01:01:47e, 04:01:01:48e,<br>04:01:01:49e, 04:01:01:50e, 04:01:01:51e,<br>04:01:01:52e, 04:01:01:53e, 04:01:02e, | 04:01P<br>213:01P<br>334:01P<br>523:01P | LFQG  | EEFA  | AAE   | ILEEK | M     | GGPM  |

04:01:03e, 04:01:04:01e, 04:01:04:02e,  
04:01:05e, 04:01:06e, 04:01:07e, 04:01:08e,  
04:01:09e, 04:01:10e, 04:01:11e, 04:01:12e,  
04:01:13e, 04:01:14e, 04:01:15e, 04:01:16e,  
04:01:17e, 04:01:18e, 04:01:19e, 04:01:20e,  
04:01:21e, 04:01:22e, 04:01:23e, 04:01:24e,  
04:01:25e, 04:01:26e, 04:01:27e, 04:01:28e,  
04:01:29e, 04:01:30e, 04:01:31e, 04:01:32e,  
04:01:33e, 04:01:34e, 04:01:35e, 04:01:36e,  
04:01:37:01e, 04:01:37:02e, 04:01:38e,  
04:01:39:01e, 04:01:39:02e, 04:01:40e,  
04:01:41e, 04:01:42e, 04:01:43e, 04:01:44e,  
04:01:45e, 04:01:46e, 04:01:47e, 04:01:48e,  
04:01:49e, 04:01:50e / DPB1\* 213:01:01e,  
213:01:02e / DPB1\* 334:01:01e, 334:01:02e /  
DPB1\* 350:01e / DPB1\* 415:01e / DPB1\*  
459:01e / DPB1\* 464:01e / DPB1\*  
523:01:01e, 523:01:02e / DPB1\* 534:01e /  
DPB1\* 615:01e / DPB1\* 618:01e / DPB1\*  
670:01e / DPB1\* 677:01e / DPB1\* 699:01e /  
DPB1\* 755:01e / DPB1\* 757:01e / DPB1\*  
765:01e / DPB1\* 767:01e / DPB1\* 784:01e /  
DPB1\* 804:01e / DPB1\* 806:01:01:01e,  
806:01:01:02e / DPB1\* 813:01e / DPB1\*  
820:01e / DPB1\* 824:01:01e, 824:01:02e /  
DPB1\* 826:01e / DPB1\* 850:01e / DPB1\*  
859:01e / DPB1\* 880:01e / DPB1\* 882:01e /  
DPB1\* 926:01e / DPB1\* 932:01e / DPB1\*  
939:01e / DPB1\* 978:01e / DPB1\* 988:01e /  
DPB1\* 989:01e / DPB1\* 992:01e / DPB1\*  
997:01e / DPB1\* 1001:01e / DPB1\*  
1002:01e / DPB1\* 1003:01e / DPB1\*  
1004:01e / DPB1\* 1010:01e / DPB1\*  
1011:01e / DPB1\* 1023:01e / DPB1\*  
1033:01e / DPB1\* 1074:01e / DPB1\*  
1086:01e / DPB1\* 1091:01e / DPB1\*  
1100:01e / DPB1\* 1129:01e / DPB1\*  
1132:01e / DPB1\* 1146:01e / DPB1\*  
1148:01Qe / DPB1\* 1152:01e / DPB1\*  
1155:01e / DPB1\* 1161:01e / DPB1\*  
1164:01e

DPB1\* 04:01:01:24Ne / DPB1\* 99:01e /  
DPB1\* 120:01Ne / DPB1\* 121:01e / DPB1\*  
128:01e / DPB1\* 134:01e / DPB1\* 149:01e /  
DPB1\* 169:01e / DPB1\* 174:01e / DPB1\*  
175:01e / DPB1\* 180:01e / DPB1\* 181:01e /  
DPB1\* 192:01e / DPB1\* 193:01e / DPB1\*  
194:01e / DPB1\* 195:01e / DPB1\* 212:01e /  
DPB1\* 224:01e / DPB1\* 225:01e / DPB1\*  
228:01e / DPB1\* 231:01e / DPB1\* 232:01e /  
DPB1\* 240:01e / DPB1\* 253:01e / DPB1\*  
255:01e / DPB1\* 262:01e / DPB1\* 272:01e /  
DPB1\* 275:01e / DPB1\* 276:01e / DPB1\*  
281:01e / DPB1\* 282:01e / DPB1\* 283:01e /  
DPB1\* 298:01e / DPB1\* 320:01e / DPB1\*  
323:01e / DPB1\* 335:01e / DPB1\* 336:01e /  
DPB1\* 341:01e / DPB1\* 356:01e / DPB1\*  
360:01e / DPB1\* 372:01e / DPB1\* 376:01e /  
DPB1\* 378:01e / DPB1\* 396:01e / DPB1\*  
397:01e / DPB1\* 418:01e / DPB1\* 425:01e /  
DPB1\* 426:01e / DPB1\* 428:01e / DPB1\*  
434:01e / DPB1\* 453:01e / DPB1\* 455:01Ne /  
DPB1\* 465:01e / DPB1\* 468:01e / DPB1\*  
475:01e / DPB1\* 476:01e / DPB1\* 479:01e /  
DPB1\* 485:01e / DPB1\* 486:01e / DPB1\*

-

487:01e / DPB1\* 497:01e / DPB1\* 500:01e /  
 DPB1\* 520:01e / DPB1\* 521:01e / DPB1\*  
 522:01e / DPB1\* 524:01e / DPB1\* 529:01e /  
 DPB1\* 553:01e / DPB1\* 554:01e / DPB1\*  
 556:01e / DPB1\* 559:01e / DPB1\* 569:01e /  
 DPB1\* 575:01e / DPB1\* 578:01e / DPB1\*  
 583:01e / DPB1\* 591:01e / DPB1\* 593:01e /  
 DPB1\* 607:01e / DPB1\* 614:01e / DPB1\*  
 625:01e / DPB1\* 643:01e / DPB1\* 658:01e /  
 DPB1\* 666:01e / DPB1\* 682:01e / DPB1\*  
 683:01e / DPB1\* 694:01e / DPB1\* 722:01e /  
 DPB1\* 739:01e / DPB1\* 742:01e / DPB1\*  
 750:01e / DPB1\* 754:01Ne / DPB1\*  
 756:01Ne / DPB1\* 758:01e / DPB1\* 761:01e /  
 DPB1\* 769:01e / DPB1\* 772:01e / DPB1\*  
 773:01e / DPB1\* 788:01e / DPB1\* 795:01e /  
 DPB1\* 803:01e / DPB1\* 808:01e / DPB1\*  
 811:01e / DPB1\* 812:01e / DPB1\* 814:01e /  
 DPB1\* 837:01e / DPB1\* 842:01e / DPB1\*  
 852:01e / DPB1\* 878:01Ne / DPB1\* 895:01e /  
 DPB1\* 915:01e / DPB1\* 957:01e / DPB1\*  
 966:01e / DPB1\* 974:01Ne / DPB1\* 993:01e /  
 DPB1\* 1040:01e / DPB1\* 1042:01e / DPB1\*  
 1048:01e / DPB1\* 1060:01e / DPB1\*  
 1062:01e / DPB1\* 1064:01e / DPB1\*  
 1066:01e / DPB1\* 1108:01e / DPB1\*  
 1112:01Ne / DPB1\* 1113:01e / DPB1\*  
 1121:01Ne / DPB1\* 1139:01e / DPB1\*  
 1167:01e

**EDP178**

DPB1\* 178:01e

-

LFQG

EEFA

AAE

ILEEK

M

GGPV

1 rare

*One side of this epitope requires a RARE allele, review results to confirm assignment.*

OR

| EPITYPE                              | ALLELES                                                                                                                                                                                                                                                                                                                                                                                                                                                                                                                                                                                                                                                                                                                                                                                                                                                                                                                                                                                                                                                                                                         | P GROUP                                 | HVR-A | HVR-B | HVR-C | HVR-D | HVR-E | HVR-F |
|--------------------------------------|-----------------------------------------------------------------------------------------------------------------------------------------------------------------------------------------------------------------------------------------------------------------------------------------------------------------------------------------------------------------------------------------------------------------------------------------------------------------------------------------------------------------------------------------------------------------------------------------------------------------------------------------------------------------------------------------------------------------------------------------------------------------------------------------------------------------------------------------------------------------------------------------------------------------------------------------------------------------------------------------------------------------------------------------------------------------------------------------------------------------|-----------------------------------------|-------|-------|-------|-------|-------|-------|
| <b>EDP04</b><br>1 common<br>291 rare | DPB1* 04:01:01:01, 04:01:01:02e,<br>04:01:01:03e, 04:01:01:04e, 04:01:01:05e,<br>04:01:01:06e, 04:01:01:07e, 04:01:01:08e,<br>04:01:01:09e, 04:01:01:10e, 04:01:01:11e,<br>04:01:01:12e, 04:01:01:13e, 04:01:01:14e,<br>04:01:01:15e, 04:01:01:16e, 04:01:01:17e,<br>04:01:01:18e, 04:01:01:19e, 04:01:01:20e,<br>04:01:01:21e, 04:01:01:22e, 04:01:01:23e,<br>04:01:01:25e, 04:01:01:26e, 04:01:01:27e,<br>04:01:01:28e, 04:01:01:29e, 04:01:01:30e,<br>04:01:01:31e, 04:01:01:32e, 04:01:01:33e,<br>04:01:01:34e, 04:01:01:35e, 04:01:01:36e,<br>04:01:01:37e, 04:01:01:38e, 04:01:01:39e,<br>04:01:01:40e, 04:01:01:41e, 04:01:01:42e,<br>04:01:01:43e, 04:01:01:44e, 04:01:01:45e,<br>04:01:01:46e, 04:01:01:47e, 04:01:01:48e,<br>04:01:01:49e, 04:01:01:50e, 04:01:01:51e,<br>04:01:01:52e, 04:01:01:53e, 04:01:02e,<br>04:01:03e, 04:01:04:01e, 04:01:04:02e,<br>04:01:05e, 04:01:06e, 04:01:07e, 04:01:08e,<br>04:01:09e, 04:01:10e, 04:01:11e, 04:01:12e,<br>04:01:13e, 04:01:14e, 04:01:15e, 04:01:16e,<br>04:01:17e, 04:01:18e, 04:01:19e, 04:01:20e,<br>04:01:21e, 04:01:22e, 04:01:23e, 04:01:24e, | 04:01P<br>213:01P<br>334:01P<br>523:01P | LFQG  | EEFA  | AAE   | ILEEK | M     | GGPM  |

04:01:25e, 04:01:26e, 04:01:27e, 04:01:28e,  
04:01:29e, 04:01:30e, 04:01:31e, 04:01:32e,  
04:01:33e, 04:01:34e, 04:01:35e, 04:01:36e,  
04:01:37:01e, 04:01:37:02e, 04:01:38e,  
04:01:39:01e, 04:01:39:02e, 04:01:40e,  
04:01:41e, 04:01:42e, 04:01:43e, 04:01:44e,  
04:01:45e, 04:01:46e, 04:01:47e, 04:01:48e,  
04:01:49e, 04:01:50e / DPB1\* 213:01:01e,  
213:01:02e / DPB1\* 334:01:01e, 334:01:02e /  
DPB1\* 350:01e / DPB1\* 415:01e / DPB1\*  
459:01e / DPB1\* 464:01e / DPB1\*  
523:01:01e, 523:01:02e / DPB1\* 534:01e /  
DPB1\* 615:01e / DPB1\* 618:01e / DPB1\*  
670:01e / DPB1\* 677:01e / DPB1\* 699:01e /  
DPB1\* 755:01e / DPB1\* 757:01e / DPB1\*  
765:01e / DPB1\* 767:01e / DPB1\* 784:01e /  
DPB1\* 804:01e / DPB1\* 806:01:01:01e,  
806:01:01:02e / DPB1\* 813:01e / DPB1\*  
820:01e / DPB1\* 824:01:01e, 824:01:02e /  
DPB1\* 826:01e / DPB1\* 850:01e / DPB1\*  
859:01e / DPB1\* 880:01e / DPB1\* 882:01e /  
DPB1\* 926:01e / DPB1\* 932:01e / DPB1\*  
939:01e / DPB1\* 978:01e / DPB1\* 988:01e /  
DPB1\* 989:01e / DPB1\* 992:01e / DPB1\*  
997:01e / DPB1\* 1001:01e / DPB1\*  
1002:01e / DPB1\* 1003:01e / DPB1\*  
1004:01e / DPB1\* 1010:01e / DPB1\*  
1011:01e / DPB1\* 1023:01e / DPB1\*  
1033:01e / DPB1\* 1074:01e / DPB1\*  
1086:01e / DPB1\* 1091:01e / DPB1\*  
1100:01e / DPB1\* 1129:01e / DPB1\*  
1132:01e / DPB1\* 1146:01e / DPB1\*  
1148:01Qe / DPB1\* 1152:01e / DPB1\*  
1155:01e / DPB1\* 1161:01e / DPB1\*  
1164:01e

DPB1\* 04:01:01:24Ne / DPB1\* 99:01e /  
DPB1\* 120:01Ne / DPB1\* 121:01e / DPB1\*  
128:01e / DPB1\* 134:01e / DPB1\* 149:01e /  
DPB1\* 169:01e / DPB1\* 174:01e / DPB1\*  
175:01e / DPB1\* 180:01e / DPB1\* 181:01e /  
DPB1\* 192:01e / DPB1\* 193:01e / DPB1\*  
194:01e / DPB1\* 195:01e / DPB1\* 212:01e /  
DPB1\* 224:01e / DPB1\* 225:01e / DPB1\*  
228:01e / DPB1\* 231:01e / DPB1\* 232:01e /  
DPB1\* 240:01e / DPB1\* 253:01e / DPB1\*  
255:01e / DPB1\* 262:01e / DPB1\* 272:01e /  
DPB1\* 275:01e / DPB1\* 276:01e / DPB1\*  
281:01e / DPB1\* 282:01e / DPB1\* 283:01e /  
DPB1\* 298:01e / DPB1\* 320:01e / DPB1\*  
323:01e / DPB1\* 335:01e / DPB1\* 336:01e /  
DPB1\* 341:01e / DPB1\* 356:01e / DPB1\*  
360:01e / DPB1\* 372:01e / DPB1\* 376:01e /  
DPB1\* 378:01e / DPB1\* 396:01e / DPB1\*  
397:01e / DPB1\* 418:01e / DPB1\* 425:01e /  
DPB1\* 426:01e / DPB1\* 428:01e / DPB1\*  
434:01e / DPB1\* 453:01e / DPB1\* 455:01Ne /  
DPB1\* 465:01e / DPB1\* 468:01e / DPB1\*  
475:01e / DPB1\* 476:01e / DPB1\* 479:01e /  
DPB1\* 485:01e / DPB1\* 486:01e / DPB1\*  
487:01e / DPB1\* 497:01e / DPB1\* 500:01e /  
DPB1\* 520:01e / DPB1\* 521:01e / DPB1\*  
522:01e / DPB1\* 524:01e / DPB1\* 529:01e /  
DPB1\* 553:01e / DPB1\* 554:01e / DPB1\*  
556:01e / DPB1\* 559:01e / DPB1\* 569:01e /  
DPB1\* 575:01e / DPB1\* 578:01e / DPB1\*

-



583:01e / DPB1\* 591:01e / DPB1\* 593:01e /  
 DPB1\* 607:01e / DPB1\* 614:01e / DPB1\*  
 625:01e / DPB1\* 643:01e / DPB1\* 658:01e /  
 DPB1\* 666:01e / DPB1\* 682:01e / DPB1\*  
 683:01e / DPB1\* 694:01e / DPB1\* 722:01e /  
 DPB1\* 739:01e / DPB1\* 742:01e / DPB1\*  
 750:01e / DPB1\* 754:01Ne / DPB1\*  
 756:01Ne / DPB1\* 758:01e / DPB1\* 761:01e /  
 DPB1\* 769:01e / DPB1\* 772:01e / DPB1\*  
 773:01e / DPB1\* 788:01e / DPB1\* 795:01e /  
 DPB1\* 803:01e / DPB1\* 808:01e / DPB1\*  
 811:01e / DPB1\* 812:01e / DPB1\* 814:01e /  
 DPB1\* 837:01e / DPB1\* 842:01e / DPB1\*  
 852:01e / DPB1\* 878:01Ne / DPB1\* 895:01e /  
 DPB1\* 915:01e / DPB1\* 957:01e / DPB1\*  
 966:01e / DPB1\* 974:01Ne / DPB1\* 993:01e /  
 DPB1\* 1040:01e / DPB1\* 1042:01e / DPB1\*  
 1048:01e / DPB1\* 1060:01e / DPB1\*  
 1062:01e / DPB1\* 1064:01e / DPB1\*  
 1066:01e / DPB1\* 1108:01e / DPB1\*  
 1112:01Ne / DPB1\* 1113:01e / DPB1\*  
 1121:01Ne / DPB1\* 1139:01e / DPB1\*  
 1167:01e

**EDP875**

DPB1\* 875:01Ne

- FSRD RSSR - - - -

1 rare

*One side of this epitype requires a RARE allele, review results to confirm assignment.*

OR

| EPITYPE                                  | ALLELES                                                                                                                                                                                                                                                                                                                                                                                                                                                                                                                                                                                                                                                                                                                                                                                                                                                                                                                                                                                                                                                                                                                                                                                                                                                                                                                                                                                                 | P GROUP                                 | HVR-A | HVR-B | HVR-C | HVR-D | HVR-E | HVR-F |
|------------------------------------------|---------------------------------------------------------------------------------------------------------------------------------------------------------------------------------------------------------------------------------------------------------------------------------------------------------------------------------------------------------------------------------------------------------------------------------------------------------------------------------------------------------------------------------------------------------------------------------------------------------------------------------------------------------------------------------------------------------------------------------------------------------------------------------------------------------------------------------------------------------------------------------------------------------------------------------------------------------------------------------------------------------------------------------------------------------------------------------------------------------------------------------------------------------------------------------------------------------------------------------------------------------------------------------------------------------------------------------------------------------------------------------------------------------|-----------------------------------------|-------|-------|-------|-------|-------|-------|
| <b>EDP04</b><br><br>1 common<br>291 rare | <b>DPB1* 04:01:01:01</b> , 04:01:01:02e,<br>04:01:01:03e, 04:01:01:04e, 04:01:01:05e,<br>04:01:01:06e, 04:01:01:07e, 04:01:01:08e,<br>04:01:01:09e, 04:01:01:10e, 04:01:01:11e,<br>04:01:01:12e, 04:01:01:13e, 04:01:01:14e,<br>04:01:01:15e, 04:01:01:16e, 04:01:01:17e,<br>04:01:01:18e, 04:01:01:19e, 04:01:01:20e,<br>04:01:01:21e, 04:01:01:22e, 04:01:01:23e,<br>04:01:01:25e, 04:01:01:26e, 04:01:01:27e,<br>04:01:01:28e, 04:01:01:29e, 04:01:01:30e,<br>04:01:01:31e, 04:01:01:32e, 04:01:01:33e,<br>04:01:01:34e, 04:01:01:35e, 04:01:01:36e,<br>04:01:01:37e, 04:01:01:38e, 04:01:01:39e,<br>04:01:01:40e, 04:01:01:41e, 04:01:01:42e,<br>04:01:01:43e, 04:01:01:44e, 04:01:01:45e,<br>04:01:01:46e, 04:01:01:47e, 04:01:01:48e,<br>04:01:01:49e, 04:01:01:50e, 04:01:01:51e,<br>04:01:01:52e, 04:01:01:53e, 04:01:02e,<br>04:01:03e, 04:01:04:01e, 04:01:04:02e,<br>04:01:05e, 04:01:06e, 04:01:07e, 04:01:08e,<br>04:01:09e, 04:01:10e, 04:01:11e, 04:01:12e,<br>04:01:13e, 04:01:14e, 04:01:15e, 04:01:16e,<br>04:01:17e, 04:01:18e, 04:01:19e, 04:01:20e,<br>04:01:21e, 04:01:22e, 04:01:23e, 04:01:24e,<br>04:01:25e, 04:01:26e, 04:01:27e, 04:01:28e,<br>04:01:29e, 04:01:30e, 04:01:31e, 04:01:32e,<br>04:01:33e, 04:01:34e, 04:01:35e, 04:01:36e,<br>04:01:37:01e, 04:01:37:02e, 04:01:38e,<br>04:01:39:01e, 04:01:39:02e, 04:01:40e,<br>04:01:41e, 04:01:42e, 04:01:43e, 04:01:44e, | 04:01P<br>213:01P<br>334:01P<br>523:01P | LFQG  | EEFA  | AAE   | ILEEK | M     | GGPM  |

04:01:45e, 04:01:46e, 04:01:47e, 04:01:48e,  
04:01:49e, 04:01:50e / DPB1\* 213:01:01e,  
213:01:02e / DPB1\* 334:01:01e, 334:01:02e /  
DPB1\* 350:01e / DPB1\* 415:01e / DPB1\*  
459:01e / DPB1\* 464:01e / DPB1\*  
523:01:01e, 523:01:02e / DPB1\* 534:01e /  
DPB1\* 615:01e / DPB1\* 618:01e / DPB1\*  
670:01e / DPB1\* 677:01e / DPB1\* 699:01e /  
DPB1\* 755:01e / DPB1\* 757:01e / DPB1\*  
765:01e / DPB1\* 767:01e / DPB1\* 784:01e /  
DPB1\* 804:01e / DPB1\* 806:01:01:01e,  
806:01:01:02e / DPB1\* 813:01e / DPB1\*  
820:01e / DPB1\* 824:01:01e, 824:01:02e /  
DPB1\* 826:01e / DPB1\* 850:01e / DPB1\*  
859:01e / DPB1\* 880:01e / DPB1\* 882:01e /  
DPB1\* 926:01e / DPB1\* 932:01e / DPB1\*  
939:01e / DPB1\* 978:01e / DPB1\* 988:01e /  
DPB1\* 989:01e / DPB1\* 992:01e / DPB1\*  
997:01e / DPB1\* 1001:01e / DPB1\*  
1002:01e / DPB1\* 1003:01e / DPB1\*  
1004:01e / DPB1\* 1010:01e / DPB1\*  
1011:01e / DPB1\* 1023:01e / DPB1\*  
1033:01e / DPB1\* 1074:01e / DPB1\*  
1086:01e / DPB1\* 1091:01e / DPB1\*  
1100:01e / DPB1\* 1129:01e / DPB1\*  
1132:01e / DPB1\* 1146:01e / DPB1\*  
1148:01Qe / DPB1\* 1152:01e / DPB1\*  
1155:01e / DPB1\* 1161:01e / DPB1\*  
1164:01e

DPB1\* 04:01:01:24Ne / DPB1\* 99:01e /  
DPB1\* 120:01Ne / DPB1\* 121:01e / DPB1\*  
128:01e / DPB1\* 134:01e / DPB1\* 149:01e /  
DPB1\* 169:01e / DPB1\* 174:01e / DPB1\*  
175:01e / DPB1\* 180:01e / DPB1\* 181:01e /  
DPB1\* 192:01e / DPB1\* 193:01e / DPB1\*  
194:01e / DPB1\* 195:01e / DPB1\* 212:01e /  
DPB1\* 224:01e / DPB1\* 225:01e / DPB1\*  
228:01e / DPB1\* 231:01e / DPB1\* 232:01e /  
DPB1\* 240:01e / DPB1\* 253:01e / DPB1\*  
255:01e / DPB1\* 262:01e / DPB1\* 272:01e /  
DPB1\* 275:01e / DPB1\* 276:01e / DPB1\*  
281:01e / DPB1\* 282:01e / DPB1\* 283:01e /  
DPB1\* 298:01e / DPB1\* 320:01e / DPB1\*  
323:01e / DPB1\* 335:01e / DPB1\* 336:01e /  
DPB1\* 341:01e / DPB1\* 356:01e / DPB1\*  
360:01e / DPB1\* 372:01e / DPB1\* 376:01e /  
DPB1\* 378:01e / DPB1\* 396:01e / DPB1\*  
397:01e / DPB1\* 418:01e / DPB1\* 425:01e /  
DPB1\* 426:01e / DPB1\* 428:01e / DPB1\*  
434:01e / DPB1\* 453:01e / DPB1\* 455:01Ne /  
DPB1\* 465:01e / DPB1\* 468:01e / DPB1\*  
475:01e / DPB1\* 476:01e / DPB1\* 479:01e /  
DPB1\* 485:01e / DPB1\* 486:01e / DPB1\*  
487:01e / DPB1\* 497:01e / DPB1\* 500:01e /  
DPB1\* 520:01e / DPB1\* 521:01e / DPB1\*  
522:01e / DPB1\* 524:01e / DPB1\* 529:01e /  
DPB1\* 553:01e / DPB1\* 554:01e / DPB1\*  
556:01e / DPB1\* 559:01e / DPB1\* 569:01e /  
DPB1\* 575:01e / DPB1\* 578:01e / DPB1\*  
583:01e / DPB1\* 591:01e / DPB1\* 593:01e /  
DPB1\* 607:01e / DPB1\* 614:01e / DPB1\*  
625:01e / DPB1\* 643:01e / DPB1\* 658:01e /  
DPB1\* 666:01e / DPB1\* 682:01e / DPB1\*  
683:01e / DPB1\* 694:01e / DPB1\* 722:01e /  
DPB1\* 739:01e / DPB1\* 742:01e / DPB1\*

-

750:01e / DPB1\* 754:01Ne / DPB1\*  
 756:01Ne / DPB1\* 758:01e / DPB1\* 761:01e /  
 DPB1\* 769:01e / DPB1\* 772:01e / DPB1\*  
 773:01e / DPB1\* 788:01e / DPB1\* 795:01e /  
 DPB1\* 803:01e / DPB1\* 808:01e / DPB1\*  
 811:01e / DPB1\* 812:01e / DPB1\* 814:01e /  
 DPB1\* 837:01e / DPB1\* 842:01e / DPB1\*  
 852:01e / DPB1\* 878:01Ne / DPB1\* 895:01e /  
 DPB1\* 915:01e / DPB1\* 957:01e / DPB1\*  
 966:01e / DPB1\* 974:01Ne / DPB1\* 993:01e /  
 DPB1\* 1040:01e / DPB1\* 1042:01e / DPB1\*  
 1048:01e / DPB1\* 1060:01e / DPB1\*  
 1062:01e / DPB1\* 1064:01e / DPB1\*  
 1066:01e / DPB1\* 1108:01e / DPB1\*  
 1112:01Ne / DPB1\* 1113:01e / DPB1\*  
 1121:01Ne / DPB1\* 1139:01e / DPB1\*  
 1167:01e

**EDP375**

DPB1\* 375:01e

-

LFQG

QEFA

AAE

ILEEK

M

GGPM

1 rare

*One side of this epitype requires a RARE allele, review results to confirm assignment.*

OR

| EPITYPE                                  | ALLELES                                                                                                                                                                                                                                                                                                                                                                                                                                                                                                                                                                                                                                                                                                                                                                                                                                                                                                                                                                                                                                                                                                                                                                                                                                                                                                                                                                                                                                                                                                                                                                                                                                                                   | P GROUP                                 | HVR-A | HVR-B | HVR-C | HVR-D | HVR-E | HVR-F |
|------------------------------------------|---------------------------------------------------------------------------------------------------------------------------------------------------------------------------------------------------------------------------------------------------------------------------------------------------------------------------------------------------------------------------------------------------------------------------------------------------------------------------------------------------------------------------------------------------------------------------------------------------------------------------------------------------------------------------------------------------------------------------------------------------------------------------------------------------------------------------------------------------------------------------------------------------------------------------------------------------------------------------------------------------------------------------------------------------------------------------------------------------------------------------------------------------------------------------------------------------------------------------------------------------------------------------------------------------------------------------------------------------------------------------------------------------------------------------------------------------------------------------------------------------------------------------------------------------------------------------------------------------------------------------------------------------------------------------|-----------------------------------------|-------|-------|-------|-------|-------|-------|
| <b>EDP04</b><br><br>1 common<br>291 rare | <b>DPB1* 04:01:01:01</b> , 04:01:01:02e,<br>04:01:01:03e, 04:01:01:04e, 04:01:01:05e,<br>04:01:01:06e, 04:01:01:07e, 04:01:01:08e,<br>04:01:01:09e, 04:01:01:10e, 04:01:01:11e,<br>04:01:01:12e, 04:01:01:13e, 04:01:01:14e,<br>04:01:01:15e, 04:01:01:16e, 04:01:01:17e,<br>04:01:01:18e, 04:01:01:19e, 04:01:01:20e,<br>04:01:01:21e, 04:01:01:22e, 04:01:01:23e,<br>04:01:01:25e, 04:01:01:26e, 04:01:01:27e,<br>04:01:01:28e, 04:01:01:29e, 04:01:01:30e,<br>04:01:01:31e, 04:01:01:32e, 04:01:01:33e,<br>04:01:01:34e, 04:01:01:35e, 04:01:01:36e,<br>04:01:01:37e, 04:01:01:38e, 04:01:01:39e,<br>04:01:01:40e, 04:01:01:41e, 04:01:01:42e,<br>04:01:01:43e, 04:01:01:44e, 04:01:01:45e,<br>04:01:01:46e, 04:01:01:47e, 04:01:01:48e,<br>04:01:01:49e, 04:01:01:50e, 04:01:01:51e,<br>04:01:01:52e, 04:01:01:53e, 04:01:02e,<br>04:01:03e, 04:01:04:01e, 04:01:04:02e,<br>04:01:05e, 04:01:06e, 04:01:07e, 04:01:08e,<br>04:01:09e, 04:01:10e, 04:01:11e, 04:01:12e,<br>04:01:13e, 04:01:14e, 04:01:15e, 04:01:16e,<br>04:01:17e, 04:01:18e, 04:01:19e, 04:01:20e,<br>04:01:21e, 04:01:22e, 04:01:23e, 04:01:24e,<br>04:01:25e, 04:01:26e, 04:01:27e, 04:01:28e,<br>04:01:29e, 04:01:30e, 04:01:31e, 04:01:32e,<br>04:01:33e, 04:01:34e, 04:01:35e, 04:01:36e,<br>04:01:37:01e, 04:01:37:02e, 04:01:38e,<br>04:01:39:01e, 04:01:39:02e, 04:01:40e,<br>04:01:41e, 04:01:42e, 04:01:43e, 04:01:44e,<br>04:01:45e, 04:01:46e, 04:01:47e, 04:01:48e,<br>04:01:49e, 04:01:50e / DPB1* 213:01:01e,<br>213:01:02e / DPB1* 334:01:01e, 334:01:02e /<br>DPB1* 350:01e / DPB1* 415:01e / DPB1*<br>459:01e / DPB1* 464:01e / DPB1*<br>523:01:01e, 523:01:02e / DPB1* 534:01e / | 04:01P<br>213:01P<br>334:01P<br>523:01P | LFQG  | EEFA  | AAE   | ILEEK | M     | GGPM  |

DPB1\* 615:01e / DPB1\* 618:01e / DPB1\*  
670:01e / DPB1\* 677:01e / DPB1\* 699:01e /  
DPB1\* 755:01e / DPB1\* 757:01e / DPB1\*  
765:01e / DPB1\* 767:01e / DPB1\* 784:01e /  
DPB1\* 804:01e / DPB1\* 806:01:01:01e,  
806:01:01:02e / DPB1\* 813:01e / DPB1\*  
820:01e / DPB1\* 824:01:01e, 824:01:02e /  
DPB1\* 826:01e / DPB1\* 850:01e / DPB1\*  
859:01e / DPB1\* 880:01e / DPB1\* 882:01e /  
DPB1\* 926:01e / DPB1\* 932:01e / DPB1\*  
939:01e / DPB1\* 978:01e / DPB1\* 988:01e /  
DPB1\* 989:01e / DPB1\* 992:01e / DPB1\*  
997:01e / DPB1\* 1001:01e / DPB1\*  
1002:01e / DPB1\* 1003:01e / DPB1\*  
1004:01e / DPB1\* 1010:01e / DPB1\*  
1011:01e / DPB1\* 1023:01e / DPB1\*  
1033:01e / DPB1\* 1074:01e / DPB1\*  
1086:01e / DPB1\* 1091:01e / DPB1\*  
1100:01e / DPB1\* 1129:01e / DPB1\*  
1132:01e / DPB1\* 1146:01e / DPB1\*  
1148:01Qe / DPB1\* 1152:01e / DPB1\*  
1155:01e / DPB1\* 1161:01e / DPB1\*  
1164:01e

DPB1\* 04:01:01:24Ne / DPB1\* 99:01e /  
DPB1\* 120:01Ne / DPB1\* 121:01e / DPB1\*  
128:01e / DPB1\* 134:01e / DPB1\* 149:01e /  
DPB1\* 169:01e / DPB1\* 174:01e / DPB1\*  
175:01e / DPB1\* 180:01e / DPB1\* 181:01e /  
DPB1\* 192:01e / DPB1\* 193:01e / DPB1\*  
194:01e / DPB1\* 195:01e / DPB1\* 212:01e /  
DPB1\* 224:01e / DPB1\* 225:01e / DPB1\*  
228:01e / DPB1\* 231:01e / DPB1\* 232:01e /  
DPB1\* 240:01e / DPB1\* 253:01e / DPB1\*  
255:01e / DPB1\* 262:01e / DPB1\* 272:01e /  
DPB1\* 275:01e / DPB1\* 276:01e / DPB1\*  
281:01e / DPB1\* 282:01e / DPB1\* 283:01e /  
DPB1\* 298:01e / DPB1\* 320:01e / DPB1\*  
323:01e / DPB1\* 335:01e / DPB1\* 336:01e /  
DPB1\* 341:01e / DPB1\* 356:01e / DPB1\*  
360:01e / DPB1\* 372:01e / DPB1\* 376:01e /  
DPB1\* 378:01e / DPB1\* 396:01e / DPB1\*  
397:01e / DPB1\* 418:01e / DPB1\* 425:01e /  
DPB1\* 426:01e / DPB1\* 428:01e / DPB1\*  
434:01e / DPB1\* 453:01e / DPB1\* 455:01Ne /  
DPB1\* 465:01e / DPB1\* 468:01e / DPB1\*  
475:01e / DPB1\* 476:01e / DPB1\* 479:01e /  
DPB1\* 485:01e / DPB1\* 486:01e / DPB1\*  
487:01e / DPB1\* 497:01e / DPB1\* 500:01e /  
DPB1\* 520:01e / DPB1\* 521:01e / DPB1\*  
522:01e / DPB1\* 524:01e / DPB1\* 529:01e /  
DPB1\* 553:01e / DPB1\* 554:01e / DPB1\*  
556:01e / DPB1\* 559:01e / DPB1\* 569:01e /  
DPB1\* 575:01e / DPB1\* 578:01e / DPB1\*  
583:01e / DPB1\* 591:01e / DPB1\* 593:01e /  
DPB1\* 607:01e / DPB1\* 614:01e / DPB1\*  
625:01e / DPB1\* 643:01e / DPB1\* 658:01e /  
DPB1\* 666:01e / DPB1\* 682:01e / DPB1\*  
683:01e / DPB1\* 694:01e / DPB1\* 722:01e /  
DPB1\* 739:01e / DPB1\* 742:01e / DPB1\*  
750:01e / DPB1\* 754:01Ne / DPB1\*  
756:01Ne / DPB1\* 758:01e / DPB1\* 761:01e /  
DPB1\* 769:01e / DPB1\* 772:01e / DPB1\*  
773:01e / DPB1\* 788:01e / DPB1\* 795:01e /  
DPB1\* 803:01e / DPB1\* 808:01e / DPB1\*  
811:01e / DPB1\* 812:01e / DPB1\* 814:01e /

-

DPB1\* 837:01e / DPB1\* 842:01e / DPB1\* 852:01e / DPB1\* 878:01Ne / DPB1\* 895:01e / DPB1\* 915:01e / DPB1\* 957:01e / DPB1\* 966:01e / DPB1\* 974:01Ne / DPB1\* 993:01e / DPB1\* 1040:01e / DPB1\* 1042:01e / DPB1\* 1048:01e / DPB1\* 1060:01e / DPB1\* 1062:01e / DPB1\* 1064:01e / DPB1\* 1066:01e / DPB1\* 1108:01e / DPB1\* 1112:01Ne / DPB1\* 1113:01e / DPB1\* 1121:01Ne / DPB1\* 1139:01e / DPB1\* 1167:01e

EDP686

DPB1\* 686:01e

-

LFQG

EGFA

AAE

ILEEK

M

GGPM

1 rare

*One side of this epitope requires a RARE allele, review results to confirm assignment.*

OR

| EPITYPE                       | ALLELES                                                                                                                                                                                                                                                                                                                                                                                                                                                                                                                                                                                                                                                                                                                                                                                                                                                                                                                                                                                                                                                                                                                                                                                                                                                                                                                                                                                                                                                                                                                                                                                                                                                                                                                                                                                                    | P GROUP                                           | HVR-A | HVR-B | HVR-C | HVR-D | HVR-E | HVR-F |
|-------------------------------|------------------------------------------------------------------------------------------------------------------------------------------------------------------------------------------------------------------------------------------------------------------------------------------------------------------------------------------------------------------------------------------------------------------------------------------------------------------------------------------------------------------------------------------------------------------------------------------------------------------------------------------------------------------------------------------------------------------------------------------------------------------------------------------------------------------------------------------------------------------------------------------------------------------------------------------------------------------------------------------------------------------------------------------------------------------------------------------------------------------------------------------------------------------------------------------------------------------------------------------------------------------------------------------------------------------------------------------------------------------------------------------------------------------------------------------------------------------------------------------------------------------------------------------------------------------------------------------------------------------------------------------------------------------------------------------------------------------------------------------------------------------------------------------------------------|---------------------------------------------------|-------|-------|-------|-------|-------|-------|
| EDP04<br>1 common<br>291 rare | <p>DPB1* 04:01:01:01, 04:01:01:02e, 04:01:01:03e, 04:01:01:04e, 04:01:01:05e, 04:01:01:06e, 04:01:01:07e, 04:01:01:08e, 04:01:01:09e, 04:01:01:10e, 04:01:01:11e, 04:01:01:12e, 04:01:01:13e, 04:01:01:14e, 04:01:01:15e, 04:01:01:16e, 04:01:01:17e, 04:01:01:18e, 04:01:01:19e, 04:01:01:20e, 04:01:01:21e, 04:01:01:22e, 04:01:01:23e, 04:01:01:25e, 04:01:01:26e, 04:01:01:27e, 04:01:01:28e, 04:01:01:29e, 04:01:01:30e, 04:01:01:31e, 04:01:01:32e, 04:01:01:33e, 04:01:01:34e, 04:01:01:35e, 04:01:01:36e, 04:01:01:37e, 04:01:01:38e, 04:01:01:39e, 04:01:01:40e, 04:01:01:41e, 04:01:01:42e, 04:01:01:43e, 04:01:01:44e, 04:01:01:45e, 04:01:01:46e, 04:01:01:47e, 04:01:01:48e, 04:01:01:49e, 04:01:01:50e, 04:01:01:51e, 04:01:01:52e, 04:01:01:53e, 04:01:02e, 04:01:03e, 04:01:04:01e, 04:01:04:02e, 04:01:05e, 04:01:06e, 04:01:07e, 04:01:08e, 04:01:09e, 04:01:10e, 04:01:11e, 04:01:12e, 04:01:13e, 04:01:14e, 04:01:15e, 04:01:16e, 04:01:17e, 04:01:18e, 04:01:19e, 04:01:20e, 04:01:21e, 04:01:22e, 04:01:23e, 04:01:24e, 04:01:25e, 04:01:26e, 04:01:27e, 04:01:28e, 04:01:29e, 04:01:30e, 04:01:31e, 04:01:32e, 04:01:33e, 04:01:34e, 04:01:35e, 04:01:36e, 04:01:37:01e, 04:01:37:02e, 04:01:38e, 04:01:39:01e, 04:01:39:02e, 04:01:40e, 04:01:41e, 04:01:42e, 04:01:43e, 04:01:44e, 04:01:45e, 04:01:46e, 04:01:47e, 04:01:48e, 04:01:49e, 04:01:50e / DPB1* 213:01:01e, 213:01:02e / DPB1* 334:01:01e, 334:01:02e / DPB1* 350:01e / DPB1* 415:01e / DPB1* 459:01e / DPB1* 464:01e / DPB1* 523:01:01e, 523:01:02e / DPB1* 534:01e / DPB1* 615:01e / DPB1* 618:01e / DPB1* 670:01e / DPB1* 677:01e / DPB1* 699:01e / DPB1* 755:01e / DPB1* 757:01e / DPB1* 765:01e / DPB1* 767:01e / DPB1* 784:01e / DPB1* 804:01e / DPB1* 806:01:01:01e, 806:01:01:02e / DPB1* 813:01e / DPB1*</p> | <p>04:01P<br/>213:01P<br/>334:01P<br/>523:01P</p> | LFQG  | EEFA  | AAE   | ILEEK | M     | GGPM  |

820:01e / DPB1\* 824:01:01e, 824:01:02e /  
DPB1\* 826:01e / DPB1\* 850:01e / DPB1\*  
859:01e / DPB1\* 880:01e / DPB1\* 882:01e /  
DPB1\* 926:01e / DPB1\* 932:01e / DPB1\*  
939:01e / DPB1\* 978:01e / DPB1\* 988:01e /  
DPB1\* 989:01e / DPB1\* 992:01e / DPB1\*  
997:01e / DPB1\* 1001:01e / DPB1\*  
1002:01e / DPB1\* 1003:01e / DPB1\*  
1004:01e / DPB1\* 1010:01e / DPB1\*  
1011:01e / DPB1\* 1023:01e / DPB1\*  
1033:01e / DPB1\* 1074:01e / DPB1\*  
1086:01e / DPB1\* 1091:01e / DPB1\*  
1100:01e / DPB1\* 1129:01e / DPB1\*  
1132:01e / DPB1\* 1146:01e / DPB1\*  
1148:01Qe / DPB1\* 1152:01e / DPB1\*  
1155:01e / DPB1\* 1161:01e / DPB1\*  
1164:01e

DPB1\* 04:01:01:24Ne / DPB1\* 99:01e /  
DPB1\* 120:01Ne / DPB1\* 121:01e / DPB1\*  
128:01e / DPB1\* 134:01e / DPB1\* 149:01e /  
DPB1\* 169:01e / DPB1\* 174:01e / DPB1\*  
175:01e / DPB1\* 180:01e / DPB1\* 181:01e /  
DPB1\* 192:01e / DPB1\* 193:01e / DPB1\*  
194:01e / DPB1\* 195:01e / DPB1\* 212:01e /  
DPB1\* 224:01e / DPB1\* 225:01e / DPB1\*  
228:01e / DPB1\* 231:01e / DPB1\* 232:01e /  
DPB1\* 240:01e / DPB1\* 253:01e / DPB1\*  
255:01e / DPB1\* 262:01e / DPB1\* 272:01e /  
DPB1\* 275:01e / DPB1\* 276:01e / DPB1\*  
281:01e / DPB1\* 282:01e / DPB1\* 283:01e /  
DPB1\* 298:01e / DPB1\* 320:01e / DPB1\*  
323:01e / DPB1\* 335:01e / DPB1\* 336:01e /  
DPB1\* 341:01e / DPB1\* 356:01e / DPB1\*  
360:01e / DPB1\* 372:01e / DPB1\* 376:01e /  
DPB1\* 378:01e / DPB1\* 396:01e / DPB1\*  
397:01e / DPB1\* 418:01e / DPB1\* 425:01e /  
DPB1\* 426:01e / DPB1\* 428:01e / DPB1\*  
434:01e / DPB1\* 453:01e / DPB1\* 455:01Ne /  
DPB1\* 465:01e / DPB1\* 468:01e / DPB1\*  
475:01e / DPB1\* 476:01e / DPB1\* 479:01e /  
DPB1\* 485:01e / DPB1\* 486:01e / DPB1\*  
487:01e / DPB1\* 497:01e / DPB1\* 500:01e /  
DPB1\* 520:01e / DPB1\* 521:01e / DPB1\*  
522:01e / DPB1\* 524:01e / DPB1\* 529:01e /  
DPB1\* 553:01e / DPB1\* 554:01e / DPB1\*  
556:01e / DPB1\* 559:01e / DPB1\* 569:01e /  
DPB1\* 575:01e / DPB1\* 578:01e / DPB1\*  
583:01e / DPB1\* 591:01e / DPB1\* 593:01e /  
DPB1\* 607:01e / DPB1\* 614:01e / DPB1\*  
625:01e / DPB1\* 643:01e / DPB1\* 658:01e /  
DPB1\* 666:01e / DPB1\* 682:01e / DPB1\*  
683:01e / DPB1\* 694:01e / DPB1\* 722:01e /  
DPB1\* 739:01e / DPB1\* 742:01e / DPB1\*  
750:01e / DPB1\* 754:01Ne / DPB1\*  
756:01Ne / DPB1\* 758:01e / DPB1\* 761:01e /  
DPB1\* 769:01e / DPB1\* 772:01e / DPB1\*  
773:01e / DPB1\* 788:01e / DPB1\* 795:01e /  
DPB1\* 803:01e / DPB1\* 808:01e / DPB1\*  
811:01e / DPB1\* 812:01e / DPB1\* 814:01e /  
DPB1\* 837:01e / DPB1\* 842:01e / DPB1\*  
852:01e / DPB1\* 878:01Ne / DPB1\* 895:01e /  
DPB1\* 915:01e / DPB1\* 957:01e / DPB1\*  
966:01e / DPB1\* 974:01Ne / DPB1\* 993:01e /  
DPB1\* 1040:01e / DPB1\* 1042:01e / DPB1\*  
1048:01e / DPB1\* 1060:01e / DPB1\*

-

|                                                                                               |                                                                                                                                                                |   |      |      |     |       |   |      |  |
|-----------------------------------------------------------------------------------------------|----------------------------------------------------------------------------------------------------------------------------------------------------------------|---|------|------|-----|-------|---|------|--|
|                                                                                               | 1062:01e / DPB1* 1064:01e / DPB1*<br>1066:01e / DPB1* 1108:01e / DPB1*<br>1112:01Ne / DPB1* 1113:01e / DPB1*<br>1121:01Ne / DPB1* 1139:01e / DPB1*<br>1167:01e |   |      |      |     |       |   |      |  |
| <b>EDP176</b>                                                                                 | DPB1* 176:01e                                                                                                                                                  | - | LFQG | EEFA | AAE | ILKEK | M | GGPM |  |
| 1 rare                                                                                        |                                                                                                                                                                |   |      |      |     |       |   |      |  |
| <i>One side of this epitope requires a RARE allele, review results to confirm assignment.</i> |                                                                                                                                                                |   |      |      |     |       |   |      |  |

OR

| EPITYPE                                  | ALLELES                                                                                                                                                                                                                                                                                                                                                                                                                                                                                                                                                                                                                                                                                                                                                                                                                                                                                                                                                                                                                                                                                                                                                                                                                                                                                                                                                                                                                                                                                                                                                                                                                                                                                                                                                                                                                                                                                                                                                                                                                                                                                                                                                                                                 | P GROUP                                 | HVR-A | HVR-B | HVR-C | HVR-D | HVR-E | HVR-F |
|------------------------------------------|---------------------------------------------------------------------------------------------------------------------------------------------------------------------------------------------------------------------------------------------------------------------------------------------------------------------------------------------------------------------------------------------------------------------------------------------------------------------------------------------------------------------------------------------------------------------------------------------------------------------------------------------------------------------------------------------------------------------------------------------------------------------------------------------------------------------------------------------------------------------------------------------------------------------------------------------------------------------------------------------------------------------------------------------------------------------------------------------------------------------------------------------------------------------------------------------------------------------------------------------------------------------------------------------------------------------------------------------------------------------------------------------------------------------------------------------------------------------------------------------------------------------------------------------------------------------------------------------------------------------------------------------------------------------------------------------------------------------------------------------------------------------------------------------------------------------------------------------------------------------------------------------------------------------------------------------------------------------------------------------------------------------------------------------------------------------------------------------------------------------------------------------------------------------------------------------------------|-----------------------------------------|-------|-------|-------|-------|-------|-------|
| <b>EDP04</b><br><br>1 common<br>291 rare | <b>DPB1* 04:01:01:01</b> , 04:01:01:02e,<br>04:01:01:03e, 04:01:01:04e, 04:01:01:05e,<br>04:01:01:06e, 04:01:01:07e, 04:01:01:08e,<br>04:01:01:09e, 04:01:01:10e, 04:01:01:11e,<br>04:01:01:12e, 04:01:01:13e, 04:01:01:14e,<br>04:01:01:15e, 04:01:01:16e, 04:01:01:17e,<br>04:01:01:18e, 04:01:01:19e, 04:01:01:20e,<br>04:01:01:21e, 04:01:01:22e, 04:01:01:23e,<br>04:01:01:25e, 04:01:01:26e, 04:01:01:27e,<br>04:01:01:28e, 04:01:01:29e, 04:01:01:30e,<br>04:01:01:31e, 04:01:01:32e, 04:01:01:33e,<br>04:01:01:34e, 04:01:01:35e, 04:01:01:36e,<br>04:01:01:37e, 04:01:01:38e, 04:01:01:39e,<br>04:01:01:40e, 04:01:01:41e, 04:01:01:42e,<br>04:01:01:43e, 04:01:01:44e, 04:01:01:45e,<br>04:01:01:46e, 04:01:01:47e, 04:01:01:48e,<br>04:01:01:49e, 04:01:01:50e, 04:01:01:51e,<br>04:01:01:52e, 04:01:01:53e, 04:01:02e,<br>04:01:03e, 04:01:04:01e, 04:01:04:02e,<br>04:01:05e, 04:01:06e, 04:01:07e, 04:01:08e,<br>04:01:09e, 04:01:10e, 04:01:11e, 04:01:12e,<br>04:01:13e, 04:01:14e, 04:01:15e, 04:01:16e,<br>04:01:17e, 04:01:18e, 04:01:19e, 04:01:20e,<br>04:01:21e, 04:01:22e, 04:01:23e, 04:01:24e,<br>04:01:25e, 04:01:26e, 04:01:27e, 04:01:28e,<br>04:01:29e, 04:01:30e, 04:01:31e, 04:01:32e,<br>04:01:33e, 04:01:34e, 04:01:35e, 04:01:36e,<br>04:01:37:01e, 04:01:37:02e, 04:01:38e,<br>04:01:39:01e, 04:01:39:02e, 04:01:40e,<br>04:01:41e, 04:01:42e, 04:01:43e, 04:01:44e,<br>04:01:45e, 04:01:46e, 04:01:47e, 04:01:48e,<br>04:01:49e, 04:01:50e / DPB1* 213:01:01e,<br>213:01:02e / DPB1* 334:01:01e, 334:01:02e /<br>DPB1* 350:01e / DPB1* 415:01e / DPB1*<br>459:01e / DPB1* 464:01e / DPB1*<br>523:01:01e, 523:01:02e / DPB1* 534:01e /<br>DPB1* 615:01e / DPB1* 618:01e / DPB1*<br>670:01e / DPB1* 677:01e / DPB1* 699:01e /<br>DPB1* 755:01e / DPB1* 757:01e / DPB1*<br>765:01e / DPB1* 767:01e / DPB1* 784:01e /<br>DPB1* 804:01e / DPB1* 806:01:01:01e,<br>806:01:01:02e / DPB1* 813:01e / DPB1*<br>820:01e / DPB1* 824:01:01e, 824:01:02e /<br>DPB1* 826:01e / DPB1* 850:01e / DPB1*<br>859:01e / DPB1* 880:01e / DPB1* 882:01e /<br>DPB1* 926:01e / DPB1* 932:01e / DPB1*<br>939:01e / DPB1* 978:01e / DPB1* 988:01e /<br>DPB1* 989:01e / DPB1* 992:01e / DPB1* | 04:01P<br>213:01P<br>334:01P<br>523:01P | LFQG  | EEFA  | AAE   | ILEEK | M     | GGPM  |

997:01e / DPB1\* 1001:01e / DPB1\*  
1002:01e / DPB1\* 1003:01e / DPB1\*  
1004:01e / DPB1\* 1010:01e / DPB1\*  
1011:01e / DPB1\* 1023:01e / DPB1\*  
1033:01e / DPB1\* 1074:01e / DPB1\*  
1086:01e / DPB1\* 1091:01e / DPB1\*  
1100:01e / DPB1\* 1129:01e / DPB1\*  
1132:01e / DPB1\* 1146:01e / DPB1\*  
1148:01Qe / DPB1\* 1152:01e / DPB1\*  
1155:01e / DPB1\* 1161:01e / DPB1\*  
1164:01e

DPB1\* 04:01:01:24Ne / DPB1\* 99:01e /  
DPB1\* 120:01Ne / DPB1\* 121:01e / DPB1\*  
128:01e / DPB1\* 134:01e / DPB1\* 149:01e /  
DPB1\* 169:01e / DPB1\* 174:01e / DPB1\*  
175:01e / DPB1\* 180:01e / DPB1\* 181:01e /  
DPB1\* 192:01e / DPB1\* 193:01e / DPB1\*  
194:01e / DPB1\* 195:01e / DPB1\* 212:01e /  
DPB1\* 224:01e / DPB1\* 225:01e / DPB1\*  
228:01e / DPB1\* 231:01e / DPB1\* 232:01e /  
DPB1\* 240:01e / DPB1\* 253:01e / DPB1\*  
255:01e / DPB1\* 262:01e / DPB1\* 272:01e /  
DPB1\* 275:01e / DPB1\* 276:01e / DPB1\*  
281:01e / DPB1\* 282:01e / DPB1\* 283:01e /  
DPB1\* 298:01e / DPB1\* 320:01e / DPB1\*  
323:01e / DPB1\* 335:01e / DPB1\* 336:01e /  
DPB1\* 341:01e / DPB1\* 356:01e / DPB1\*  
360:01e / DPB1\* 372:01e / DPB1\* 376:01e /  
DPB1\* 378:01e / DPB1\* 396:01e / DPB1\*  
397:01e / DPB1\* 418:01e / DPB1\* 425:01e /  
DPB1\* 426:01e / DPB1\* 428:01e / DPB1\*  
434:01e / DPB1\* 453:01e / DPB1\* 455:01Ne /  
DPB1\* 465:01e / DPB1\* 468:01e / DPB1\*  
475:01e / DPB1\* 476:01e / DPB1\* 479:01e /  
DPB1\* 485:01e / DPB1\* 486:01e / DPB1\*  
487:01e / DPB1\* 497:01e / DPB1\* 500:01e /  
DPB1\* 520:01e / DPB1\* 521:01e / DPB1\*  
522:01e / DPB1\* 524:01e / DPB1\* 529:01e /  
DPB1\* 553:01e / DPB1\* 554:01e / DPB1\*  
556:01e / DPB1\* 559:01e / DPB1\* 569:01e /  
DPB1\* 575:01e / DPB1\* 578:01e / DPB1\*  
583:01e / DPB1\* 591:01e / DPB1\* 593:01e /  
DPB1\* 607:01e / DPB1\* 614:01e / DPB1\*  
625:01e / DPB1\* 643:01e / DPB1\* 658:01e /  
DPB1\* 666:01e / DPB1\* 682:01e / DPB1\*  
683:01e / DPB1\* 694:01e / DPB1\* 722:01e /  
DPB1\* 739:01e / DPB1\* 742:01e / DPB1\*  
750:01e / DPB1\* 754:01Ne / DPB1\*  
756:01Ne / DPB1\* 758:01e / DPB1\* 761:01e /  
DPB1\* 769:01e / DPB1\* 772:01e / DPB1\*  
773:01e / DPB1\* 788:01e / DPB1\* 795:01e /  
DPB1\* 803:01e / DPB1\* 808:01e / DPB1\*  
811:01e / DPB1\* 812:01e / DPB1\* 814:01e /  
DPB1\* 837:01e / DPB1\* 842:01e / DPB1\*  
852:01e / DPB1\* 878:01Ne / DPB1\* 895:01e /  
DPB1\* 915:01e / DPB1\* 957:01e / DPB1\*  
966:01e / DPB1\* 974:01Ne / DPB1\* 993:01e /  
DPB1\* 1040:01e / DPB1\* 1042:01e / DPB1\*  
1048:01e / DPB1\* 1060:01e / DPB1\*  
1062:01e / DPB1\* 1064:01e / DPB1\*  
1066:01e / DPB1\* 1108:01e / DPB1\*  
1112:01Ne / DPB1\* 1113:01e / DPB1\*  
1121:01Ne / DPB1\* 1139:01e / DPB1\*  
1167:01e

-



|                                                                                               |               |   |      |      |     |       |   |      |
|-----------------------------------------------------------------------------------------------|---------------|---|------|------|-----|-------|---|------|
| <b>EDP456</b>                                                                                 | DPB1* 456:01e | - | LFQG | EEFA | AAE | ILEVK | M | GGPM |
| 1 rare                                                                                        |               |   |      |      |     |       |   |      |
| <i>One side of this epitype requires a RARE allele, review results to confirm assignment.</i> |               |   |      |      |     |       |   |      |

OR

| EPITYPE                              | ALLELES                                                                                                                                                                                                                                                                                                                                                                                                                                                                                                                                                                                                                                                                                                                                                                                                                                                                                                                                                                                                                                                                                                                                                                                                                                                                                                                                                                                                                                                                                                                                                                                                                                                                                                                                                                                                                                                                                                                                                                                                                                                                                                                                                                                                                                                                                                                                                                                                                              | P GROUP                                 | HVR-A | HVR-B | HVR-C | HVR-D | HVR-E | HVR-F |
|--------------------------------------|--------------------------------------------------------------------------------------------------------------------------------------------------------------------------------------------------------------------------------------------------------------------------------------------------------------------------------------------------------------------------------------------------------------------------------------------------------------------------------------------------------------------------------------------------------------------------------------------------------------------------------------------------------------------------------------------------------------------------------------------------------------------------------------------------------------------------------------------------------------------------------------------------------------------------------------------------------------------------------------------------------------------------------------------------------------------------------------------------------------------------------------------------------------------------------------------------------------------------------------------------------------------------------------------------------------------------------------------------------------------------------------------------------------------------------------------------------------------------------------------------------------------------------------------------------------------------------------------------------------------------------------------------------------------------------------------------------------------------------------------------------------------------------------------------------------------------------------------------------------------------------------------------------------------------------------------------------------------------------------------------------------------------------------------------------------------------------------------------------------------------------------------------------------------------------------------------------------------------------------------------------------------------------------------------------------------------------------------------------------------------------------------------------------------------------------|-----------------------------------------|-------|-------|-------|-------|-------|-------|
| <b>EDP04</b><br>1 common<br>291 rare | <b>DPB1* 04:01:01:01</b> , 04:01:01:02e,<br>04:01:01:03e, 04:01:01:04e, 04:01:01:05e,<br>04:01:01:06e, 04:01:01:07e, 04:01:01:08e,<br>04:01:01:09e, 04:01:01:10e, 04:01:01:11e,<br>04:01:01:12e, 04:01:01:13e, 04:01:01:14e,<br>04:01:01:15e, 04:01:01:16e, 04:01:01:17e,<br>04:01:01:18e, 04:01:01:19e, 04:01:01:20e,<br>04:01:01:21e, 04:01:01:22e, 04:01:01:23e,<br>04:01:01:25e, 04:01:01:26e, 04:01:01:27e,<br>04:01:01:28e, 04:01:01:29e, 04:01:01:30e,<br>04:01:01:31e, 04:01:01:32e, 04:01:01:33e,<br>04:01:01:34e, 04:01:01:35e, 04:01:01:36e,<br>04:01:01:37e, 04:01:01:38e, 04:01:01:39e,<br>04:01:01:40e, 04:01:01:41e, 04:01:01:42e,<br>04:01:01:43e, 04:01:01:44e, 04:01:01:45e,<br>04:01:01:46e, 04:01:01:47e, 04:01:01:48e,<br>04:01:01:49e, 04:01:01:50e, 04:01:01:51e,<br>04:01:01:52e, 04:01:01:53e, 04:01:02e,<br>04:01:03e, 04:01:04:01e, 04:01:04:02e,<br>04:01:05e, 04:01:06e, 04:01:07e, 04:01:08e,<br>04:01:09e, 04:01:10e, 04:01:11e, 04:01:12e,<br>04:01:13e, 04:01:14e, 04:01:15e, 04:01:16e,<br>04:01:17e, 04:01:18e, 04:01:19e, 04:01:20e,<br>04:01:21e, 04:01:22e, 04:01:23e, 04:01:24e,<br>04:01:25e, 04:01:26e, 04:01:27e, 04:01:28e,<br>04:01:29e, 04:01:30e, 04:01:31e, 04:01:32e,<br>04:01:33e, 04:01:34e, 04:01:35e, 04:01:36e,<br>04:01:37:01e, 04:01:37:02e, 04:01:38e,<br>04:01:39:01e, 04:01:39:02e, 04:01:40e,<br>04:01:41e, 04:01:42e, 04:01:43e, 04:01:44e,<br>04:01:45e, 04:01:46e, 04:01:47e, 04:01:48e,<br>04:01:49e, 04:01:50e / DPB1* 213:01:01e,<br>213:01:02e / DPB1* 334:01:01e, 334:01:02e /<br>DPB1* 350:01e / DPB1* 415:01e / DPB1*<br>459:01e / DPB1* 464:01e / DPB1*<br>523:01:01e, 523:01:02e / DPB1* 534:01e /<br>DPB1* 615:01e / DPB1* 618:01e / DPB1*<br>670:01e / DPB1* 677:01e / DPB1* 699:01e /<br>DPB1* 755:01e / DPB1* 757:01e / DPB1*<br>765:01e / DPB1* 767:01e / DPB1* 784:01e /<br>DPB1* 804:01e / DPB1* 806:01:01:01e,<br>806:01:01:02e / DPB1* 813:01e / DPB1*<br>820:01e / DPB1* 824:01:01e, 824:01:02e /<br>DPB1* 826:01e / DPB1* 850:01e / DPB1*<br>859:01e / DPB1* 880:01e / DPB1* 882:01e /<br>DPB1* 926:01e / DPB1* 932:01e / DPB1*<br>939:01e / DPB1* 978:01e / DPB1* 988:01e /<br>DPB1* 989:01e / DPB1* 992:01e / DPB1*<br>997:01e / DPB1* 1001:01e / DPB1*<br>1002:01e / DPB1* 1003:01e / DPB1*<br>1004:01e / DPB1* 1010:01e / DPB1*<br>1011:01e / DPB1* 1023:01e / DPB1*<br>1033:01e / DPB1* 1074:01e / DPB1*<br>1086:01e / DPB1* 1091:01e / DPB1* | 04:01P<br>213:01P<br>334:01P<br>523:01P | LFQG  | EEFA  | AAE   | ILEEK | M     | GGPM  |

1100:01e / DPB1\* 1129:01e / DPB1\*  
 1132:01e / DPB1\* 1146:01e / DPB1\*  
 1148:01Qe / DPB1\* 1152:01e / DPB1\*  
 1155:01e / DPB1\* 1161:01e / DPB1\*  
 1164:01e

DPB1\* 04:01:01:24Ne / DPB1\* 99:01e /  
 DPB1\* 120:01Ne / DPB1\* 121:01e / DPB1\*  
 128:01e / DPB1\* 134:01e / DPB1\* 149:01e /  
 DPB1\* 169:01e / DPB1\* 174:01e / DPB1\*  
 175:01e / DPB1\* 180:01e / DPB1\* 181:01e /  
 DPB1\* 192:01e / DPB1\* 193:01e / DPB1\*  
 194:01e / DPB1\* 195:01e / DPB1\* 212:01e /  
 DPB1\* 224:01e / DPB1\* 225:01e / DPB1\*  
 228:01e / DPB1\* 231:01e / DPB1\* 232:01e /  
 DPB1\* 240:01e / DPB1\* 253:01e / DPB1\*  
 255:01e / DPB1\* 262:01e / DPB1\* 272:01e /  
 DPB1\* 275:01e / DPB1\* 276:01e / DPB1\*  
 281:01e / DPB1\* 282:01e / DPB1\* 283:01e /  
 DPB1\* 298:01e / DPB1\* 320:01e / DPB1\*  
 323:01e / DPB1\* 335:01e / DPB1\* 336:01e /  
 DPB1\* 341:01e / DPB1\* 356:01e / DPB1\*  
 360:01e / DPB1\* 372:01e / DPB1\* 376:01e /  
 DPB1\* 378:01e / DPB1\* 396:01e / DPB1\*  
 397:01e / DPB1\* 418:01e / DPB1\* 425:01e /  
 DPB1\* 426:01e / DPB1\* 428:01e / DPB1\*  
 434:01e / DPB1\* 453:01e / DPB1\* 455:01Ne /  
 DPB1\* 465:01e / DPB1\* 468:01e / DPB1\*  
 475:01e / DPB1\* 476:01e / DPB1\* 479:01e /  
 DPB1\* 485:01e / DPB1\* 486:01e / DPB1\*  
 487:01e / DPB1\* 497:01e / DPB1\* 500:01e /  
 DPB1\* 520:01e / DPB1\* 521:01e / DPB1\*  
 522:01e / DPB1\* 524:01e / DPB1\* 529:01e /  
 DPB1\* 553:01e / DPB1\* 554:01e / DPB1\*  
 556:01e / DPB1\* 559:01e / DPB1\* 569:01e /  
 DPB1\* 575:01e / DPB1\* 578:01e / DPB1\*  
 583:01e / DPB1\* 591:01e / DPB1\* 593:01e /  
 DPB1\* 607:01e / DPB1\* 614:01e / DPB1\*  
 625:01e / DPB1\* 643:01e / DPB1\* 658:01e /  
 DPB1\* 666:01e / DPB1\* 682:01e / DPB1\*  
 683:01e / DPB1\* 694:01e / DPB1\* 722:01e /  
 DPB1\* 739:01e / DPB1\* 742:01e / DPB1\*  
 750:01e / DPB1\* 754:01Ne / DPB1\*  
 756:01Ne / DPB1\* 758:01e / DPB1\* 761:01e /  
 DPB1\* 769:01e / DPB1\* 772:01e / DPB1\*  
 773:01e / DPB1\* 788:01e / DPB1\* 795:01e /  
 DPB1\* 803:01e / DPB1\* 808:01e / DPB1\*  
 811:01e / DPB1\* 812:01e / DPB1\* 814:01e /  
 DPB1\* 837:01e / DPB1\* 842:01e / DPB1\*  
 852:01e / DPB1\* 878:01Ne / DPB1\* 895:01e /  
 DPB1\* 915:01e / DPB1\* 957:01e / DPB1\*  
 966:01e / DPB1\* 974:01Ne / DPB1\* 993:01e /  
 DPB1\* 1040:01e / DPB1\* 1042:01e / DPB1\*  
 1048:01e / DPB1\* 1060:01e / DPB1\*  
 1062:01e / DPB1\* 1064:01e / DPB1\*  
 1066:01e / DPB1\* 1108:01e / DPB1\*  
 1112:01Ne / DPB1\* 1113:01e / DPB1\*  
 1121:01Ne / DPB1\* 1139:01e / DPB1\*  
 1167:01e

-

**EDP1097**

DPB1\* 1097:01e

-

LFLG

EEFA

AAE

ILEEK

M

GGPM

1 rare

*One side of this epitope requires a RARE allele, review results to confirm assignment.*

OR

| EPITYPE                       | ALLELES                                                                                                                                                                                                                                                                                                                                                                                                                                                                                                                                                                                                                                                                                                                                                                                                                                                                                                                                                                                                                                                                                                                                                                                                                                                                                                                                                                                                                                                                                                                                                                                                                                                                                                                                                                                                                                                                                                                                                                                                                                                                                                                                                                                                                                                                                                                                                                                                                                                                                                                                                                                               | P GROUP                                 | HVR-A | HVR-B | HVR-C | HVR-D | HVR-E | HVR-F |
|-------------------------------|-------------------------------------------------------------------------------------------------------------------------------------------------------------------------------------------------------------------------------------------------------------------------------------------------------------------------------------------------------------------------------------------------------------------------------------------------------------------------------------------------------------------------------------------------------------------------------------------------------------------------------------------------------------------------------------------------------------------------------------------------------------------------------------------------------------------------------------------------------------------------------------------------------------------------------------------------------------------------------------------------------------------------------------------------------------------------------------------------------------------------------------------------------------------------------------------------------------------------------------------------------------------------------------------------------------------------------------------------------------------------------------------------------------------------------------------------------------------------------------------------------------------------------------------------------------------------------------------------------------------------------------------------------------------------------------------------------------------------------------------------------------------------------------------------------------------------------------------------------------------------------------------------------------------------------------------------------------------------------------------------------------------------------------------------------------------------------------------------------------------------------------------------------------------------------------------------------------------------------------------------------------------------------------------------------------------------------------------------------------------------------------------------------------------------------------------------------------------------------------------------------------------------------------------------------------------------------------------------------|-----------------------------------------|-------|-------|-------|-------|-------|-------|
| EDP04<br>1 common<br>291 rare | <b>DPB1* 04:01:01:01</b> , 04:01:01:02e,<br>04:01:01:03e, 04:01:01:04e, 04:01:01:05e,<br>04:01:01:06e, 04:01:01:07e, 04:01:01:08e,<br>04:01:01:09e, 04:01:01:10e, 04:01:01:11e,<br>04:01:01:12e, 04:01:01:13e, 04:01:01:14e,<br>04:01:01:15e, 04:01:01:16e, 04:01:01:17e,<br>04:01:01:18e, 04:01:01:19e, 04:01:01:20e,<br>04:01:01:21e, 04:01:01:22e, 04:01:01:23e,<br>04:01:01:25e, 04:01:01:26e, 04:01:01:27e,<br>04:01:01:28e, 04:01:01:29e, 04:01:01:30e,<br>04:01:01:31e, 04:01:01:32e, 04:01:01:33e,<br>04:01:01:34e, 04:01:01:35e, 04:01:01:36e,<br>04:01:01:37e, 04:01:01:38e, 04:01:01:39e,<br>04:01:01:40e, 04:01:01:41e, 04:01:01:42e,<br>04:01:01:43e, 04:01:01:44e, 04:01:01:45e,<br>04:01:01:46e, 04:01:01:47e, 04:01:01:48e,<br>04:01:01:49e, 04:01:01:50e, 04:01:01:51e,<br>04:01:01:52e, 04:01:01:53e, 04:01:02e,<br>04:01:03e, 04:01:04:01e, 04:01:04:02e,<br>04:01:05e, 04:01:06e, 04:01:07e, 04:01:08e,<br>04:01:09e, 04:01:10e, 04:01:11e, 04:01:12e,<br>04:01:13e, 04:01:14e, 04:01:15e, 04:01:16e,<br>04:01:17e, 04:01:18e, 04:01:19e, 04:01:20e,<br>04:01:21e, 04:01:22e, 04:01:23e, 04:01:24e,<br>04:01:25e, 04:01:26e, 04:01:27e, 04:01:28e,<br>04:01:29e, 04:01:30e, 04:01:31e, 04:01:32e,<br>04:01:33e, 04:01:34e, 04:01:35e, 04:01:36e,<br>04:01:37:01e, 04:01:37:02e, 04:01:38e,<br>04:01:39:01e, 04:01:39:02e, 04:01:40e,<br>04:01:41e, 04:01:42e, 04:01:43e, 04:01:44e,<br>04:01:45e, 04:01:46e, 04:01:47e, 04:01:48e,<br>04:01:49e, 04:01:50e / DPB1* 213:01:01e,<br>213:01:02e / DPB1* 334:01:01e, 334:01:02e /<br>DPB1* 350:01e / DPB1* 415:01e / DPB1*<br>459:01e / DPB1* 464:01e / DPB1*<br>523:01:01e, 523:01:02e / DPB1* 534:01e /<br>DPB1* 615:01e / DPB1* 618:01e / DPB1*<br>670:01e / DPB1* 677:01e / DPB1* 699:01e /<br>DPB1* 755:01e / DPB1* 757:01e / DPB1*<br>765:01e / DPB1* 767:01e / DPB1* 784:01e /<br>DPB1* 804:01e / DPB1* 806:01:01:01e,<br>806:01:01:02e / DPB1* 813:01e / DPB1*<br>820:01e / DPB1* 824:01:01e, 824:01:02e /<br>DPB1* 826:01e / DPB1* 850:01e / DPB1*<br>859:01e / DPB1* 880:01e / DPB1* 882:01e /<br>DPB1* 926:01e / DPB1* 932:01e / DPB1*<br>939:01e / DPB1* 978:01e / DPB1* 988:01e /<br>DPB1* 989:01e / DPB1* 992:01e / DPB1*<br>997:01e / DPB1* 1001:01e / DPB1*<br>1002:01e / DPB1* 1003:01e / DPB1*<br>1004:01e / DPB1* 1010:01e / DPB1*<br>1011:01e / DPB1* 1023:01e / DPB1*<br>1033:01e / DPB1* 1074:01e / DPB1*<br>1086:01e / DPB1* 1091:01e / DPB1*<br>1100:01e / DPB1* 1129:01e / DPB1*<br>1132:01e / DPB1* 1146:01e / DPB1*<br>1148:01Qe / DPB1* 1152:01e / DPB1*<br>1155:01e / DPB1* 1161:01e / DPB1*<br>1164:01e | 04:01P<br>213:01P<br>334:01P<br>523:01P | LFQG  | EEFA  | AAE   | ILEEK | M     | GGPM  |

DPB1\* 04:01:01:24Ne / DPB1\* 99:01e /  
 DPB1\* 120:01Ne / DPB1\* 121:01e / DPB1\*  
 128:01e / DPB1\* 134:01e / DPB1\* 149:01e /  
 DPB1\* 169:01e / DPB1\* 174:01e / DPB1\*  
 175:01e / DPB1\* 180:01e / DPB1\* 181:01e /  
 DPB1\* 192:01e / DPB1\* 193:01e / DPB1\*  
 194:01e / DPB1\* 195:01e / DPB1\* 212:01e /  
 DPB1\* 224:01e / DPB1\* 225:01e / DPB1\*  
 228:01e / DPB1\* 231:01e / DPB1\* 232:01e /  
 DPB1\* 240:01e / DPB1\* 253:01e / DPB1\*  
 255:01e / DPB1\* 262:01e / DPB1\* 272:01e /  
 DPB1\* 275:01e / DPB1\* 276:01e / DPB1\*  
 281:01e / DPB1\* 282:01e / DPB1\* 283:01e /  
 DPB1\* 298:01e / DPB1\* 320:01e / DPB1\*  
 323:01e / DPB1\* 335:01e / DPB1\* 336:01e /  
 DPB1\* 341:01e / DPB1\* 356:01e / DPB1\*  
 360:01e / DPB1\* 372:01e / DPB1\* 376:01e /  
 DPB1\* 378:01e / DPB1\* 396:01e / DPB1\*  
 397:01e / DPB1\* 418:01e / DPB1\* 425:01e /  
 DPB1\* 426:01e / DPB1\* 428:01e / DPB1\*  
 434:01e / DPB1\* 453:01e / DPB1\* 455:01Ne /  
 DPB1\* 465:01e / DPB1\* 468:01e / DPB1\*  
 475:01e / DPB1\* 476:01e / DPB1\* 479:01e /  
 DPB1\* 485:01e / DPB1\* 486:01e / DPB1\*  
 487:01e / DPB1\* 497:01e / DPB1\* 500:01e /  
 DPB1\* 520:01e / DPB1\* 521:01e / DPB1\*  
 522:01e / DPB1\* 524:01e / DPB1\* 529:01e /  
 DPB1\* 553:01e / DPB1\* 554:01e / DPB1\*  
 556:01e / DPB1\* 559:01e / DPB1\* 569:01e /  
 DPB1\* 575:01e / DPB1\* 578:01e / DPB1\*  
 583:01e / DPB1\* 591:01e / DPB1\* 593:01e /  
 DPB1\* 607:01e / DPB1\* 614:01e / DPB1\*  
 625:01e / DPB1\* 643:01e / DPB1\* 658:01e /  
 DPB1\* 666:01e / DPB1\* 682:01e / DPB1\*  
 683:01e / DPB1\* 694:01e / DPB1\* 722:01e /  
 DPB1\* 739:01e / DPB1\* 742:01e / DPB1\*  
 750:01e / DPB1\* 754:01Ne / DPB1\*  
 756:01Ne / DPB1\* 758:01e / DPB1\* 761:01e /  
 DPB1\* 769:01e / DPB1\* 772:01e / DPB1\*  
 773:01e / DPB1\* 788:01e / DPB1\* 795:01e /  
 DPB1\* 803:01e / DPB1\* 808:01e / DPB1\*  
 811:01e / DPB1\* 812:01e / DPB1\* 814:01e /  
 DPB1\* 837:01e / DPB1\* 842:01e / DPB1\*  
 852:01e / DPB1\* 878:01Ne / DPB1\* 895:01e /  
 DPB1\* 915:01e / DPB1\* 957:01e / DPB1\*  
 966:01e / DPB1\* 974:01Ne / DPB1\* 993:01e /  
 DPB1\* 1040:01e / DPB1\* 1042:01e / DPB1\*  
 1048:01e / DPB1\* 1060:01e / DPB1\*  
 1062:01e / DPB1\* 1064:01e / DPB1\*  
 1066:01e / DPB1\* 1108:01e / DPB1\*  
 1112:01Ne / DPB1\* 1113:01e / DPB1\*  
 1121:01Ne / DPB1\* 1139:01e / DPB1\*  
 1167:01e

-

**EDP303**

DPB1\* 303:01e

-

LFQG

EEFA

AAE

**ILEER**

M

GGPM

1 rare

*One side of this epitope requires a RARE allele, review results to confirm assignment.*

OR

| EPITYPE | ALLELES | P GROUP | HVR-A | HVR-B | HVR-C | HVR-D | HVR-E | HVR-F |
|---------|---------|---------|-------|-------|-------|-------|-------|-------|
|---------|---------|---------|-------|-------|-------|-------|-------|-------|

|                                                  |                                                                                                                                                                                                                                                                                                                                                                                                                                                                                                                                                                                                                                                                                                                                                                                                                                                                                                                                                                                                                                                                                                                                                                                                                                                                                                                                                                                                                                                                                                                                                                                                                                                                                                                                                                                                                                                                                                                                                                                                                                                                                                                                                                                                                                                                                                                                                                                                                                                                                                                                                                                                                                                                       |                                                   |             |             |            |              |          |             |
|--------------------------------------------------|-----------------------------------------------------------------------------------------------------------------------------------------------------------------------------------------------------------------------------------------------------------------------------------------------------------------------------------------------------------------------------------------------------------------------------------------------------------------------------------------------------------------------------------------------------------------------------------------------------------------------------------------------------------------------------------------------------------------------------------------------------------------------------------------------------------------------------------------------------------------------------------------------------------------------------------------------------------------------------------------------------------------------------------------------------------------------------------------------------------------------------------------------------------------------------------------------------------------------------------------------------------------------------------------------------------------------------------------------------------------------------------------------------------------------------------------------------------------------------------------------------------------------------------------------------------------------------------------------------------------------------------------------------------------------------------------------------------------------------------------------------------------------------------------------------------------------------------------------------------------------------------------------------------------------------------------------------------------------------------------------------------------------------------------------------------------------------------------------------------------------------------------------------------------------------------------------------------------------------------------------------------------------------------------------------------------------------------------------------------------------------------------------------------------------------------------------------------------------------------------------------------------------------------------------------------------------------------------------------------------------------------------------------------------------|---------------------------------------------------|-------------|-------------|------------|--------------|----------|-------------|
| <p><b>EDP04</b></p> <p>1 common<br/>291 rare</p> | <p><b>DPB1* 04:01:01:01</b>, 04:01:01:02e,<br/>04:01:01:03e, 04:01:01:04e, 04:01:01:05e,<br/>04:01:01:06e, 04:01:01:07e, 04:01:01:08e,<br/>04:01:01:09e, 04:01:01:10e, 04:01:01:11e,<br/>04:01:01:12e, 04:01:01:13e, 04:01:01:14e,<br/>04:01:01:15e, 04:01:01:16e, 04:01:01:17e,<br/>04:01:01:18e, 04:01:01:19e, 04:01:01:20e,<br/>04:01:01:21e, 04:01:01:22e, 04:01:01:23e,<br/>04:01:01:25e, 04:01:01:26e, 04:01:01:27e,<br/>04:01:01:28e, 04:01:01:29e, 04:01:01:30e,<br/>04:01:01:31e, 04:01:01:32e, 04:01:01:33e,<br/>04:01:01:34e, 04:01:01:35e, 04:01:01:36e,<br/>04:01:01:37e, 04:01:01:38e, 04:01:01:39e,<br/>04:01:01:40e, 04:01:01:41e, 04:01:01:42e,<br/>04:01:01:43e, 04:01:01:44e, 04:01:01:45e,<br/>04:01:01:46e, 04:01:01:47e, 04:01:01:48e,<br/>04:01:01:49e, 04:01:01:50e, 04:01:01:51e,<br/>04:01:01:52e, 04:01:01:53e, 04:01:02e,<br/>04:01:03e, 04:01:04:01e, 04:01:04:02e,<br/>04:01:05e, 04:01:06e, 04:01:07e, 04:01:08e,<br/>04:01:09e, 04:01:10e, 04:01:11e, 04:01:12e,<br/>04:01:13e, 04:01:14e, 04:01:15e, 04:01:16e,<br/>04:01:17e, 04:01:18e, 04:01:19e, 04:01:20e,<br/>04:01:21e, 04:01:22e, 04:01:23e, 04:01:24e,<br/>04:01:25e, 04:01:26e, 04:01:27e, 04:01:28e,<br/>04:01:29e, 04:01:30e, 04:01:31e, 04:01:32e,<br/>04:01:33e, 04:01:34e, 04:01:35e, 04:01:36e,<br/>04:01:37:01e, 04:01:37:02e, 04:01:38e,<br/>04:01:39:01e, 04:01:39:02e, 04:01:40e,<br/>04:01:41e, 04:01:42e, 04:01:43e, 04:01:44e,<br/>04:01:45e, 04:01:46e, 04:01:47e, 04:01:48e,<br/>04:01:49e, 04:01:50e / DPB1* 213:01:01e,<br/>213:01:02e / DPB1* 334:01:01e, 334:01:02e /<br/>DPB1* 350:01e / DPB1* 415:01e / DPB1*<br/>459:01e / DPB1* 464:01e / DPB1*<br/>523:01:01e, 523:01:02e / DPB1* 534:01e /<br/>DPB1* 615:01e / DPB1* 618:01e / DPB1*<br/>670:01e / DPB1* 677:01e / DPB1* 699:01e /<br/>DPB1* 755:01e / DPB1* 757:01e / DPB1*<br/>765:01e / DPB1* 767:01e / DPB1* 784:01e /<br/>DPB1* 804:01e / DPB1* 806:01:01:01e,<br/>806:01:01:02e / DPB1* 813:01e / DPB1*<br/>820:01e / DPB1* 824:01:01e, 824:01:02e /<br/>DPB1* 826:01e / DPB1* 850:01e / DPB1*<br/>859:01e / DPB1* 880:01e / DPB1* 882:01e /<br/>DPB1* 926:01e / DPB1* 932:01e / DPB1*<br/>939:01e / DPB1* 978:01e / DPB1* 988:01e /<br/>DPB1* 989:01e / DPB1* 992:01e / DPB1*<br/>997:01e / DPB1* 1001:01e / DPB1*<br/>1002:01e / DPB1* 1003:01e / DPB1*<br/>1004:01e / DPB1* 1010:01e / DPB1*<br/>1011:01e / DPB1* 1023:01e / DPB1*<br/>1033:01e / DPB1* 1074:01e / DPB1*<br/>1086:01e / DPB1* 1091:01e / DPB1*<br/>1100:01e / DPB1* 1129:01e / DPB1*<br/>1132:01e / DPB1* 1146:01e / DPB1*<br/>1148:01Qe / DPB1* 1152:01e / DPB1*<br/>1155:01e / DPB1* 1161:01e / DPB1*<br/>1164:01e</p> | <p>04:01P<br/>213:01P<br/>334:01P<br/>523:01P</p> | <p>LFQG</p> | <p>EEFA</p> | <p>AAE</p> | <p>ILEEK</p> | <p>M</p> | <p>GGPM</p> |
|                                                  | <p>DPB1* 04:01:01:24Ne / DPB1* 99:01e /<br/>DPB1* 120:01Ne / DPB1* 121:01e / DPB1*<br/>128:01e / DPB1* 134:01e / DPB1* 149:01e /<br/>DPB1* 169:01e / DPB1* 174:01e / DPB1*<br/>175:01e / DPB1* 180:01e / DPB1* 181:01e /<br/>DPB1* 192:01e / DPB1* 193:01e / DPB1*</p>                                                                                                                                                                                                                                                                                                                                                                                                                                                                                                                                                                                                                                                                                                                                                                                                                                                                                                                                                                                                                                                                                                                                                                                                                                                                                                                                                                                                                                                                                                                                                                                                                                                                                                                                                                                                                                                                                                                                                                                                                                                                                                                                                                                                                                                                                                                                                                                                | <p>-</p>                                          |             |             |            |              |          |             |

194:01e / DPB1\* 195:01e / DPB1\* 212:01e /  
 DPB1\* 224:01e / DPB1\* 225:01e / DPB1\*  
 228:01e / DPB1\* 231:01e / DPB1\* 232:01e /  
 DPB1\* 240:01e / DPB1\* 253:01e / DPB1\*  
 255:01e / DPB1\* 262:01e / DPB1\* 272:01e /  
 DPB1\* 275:01e / DPB1\* 276:01e / DPB1\*  
 281:01e / DPB1\* 282:01e / DPB1\* 283:01e /  
 DPB1\* 298:01e / DPB1\* 320:01e / DPB1\*  
 323:01e / DPB1\* 335:01e / DPB1\* 336:01e /  
 DPB1\* 341:01e / DPB1\* 356:01e / DPB1\*  
 360:01e / DPB1\* 372:01e / DPB1\* 376:01e /  
 DPB1\* 378:01e / DPB1\* 396:01e / DPB1\*  
 397:01e / DPB1\* 418:01e / DPB1\* 425:01e /  
 DPB1\* 426:01e / DPB1\* 428:01e / DPB1\*  
 434:01e / DPB1\* 453:01e / DPB1\* 455:01Ne /  
 DPB1\* 465:01e / DPB1\* 468:01e / DPB1\*  
 475:01e / DPB1\* 476:01e / DPB1\* 479:01e /  
 DPB1\* 485:01e / DPB1\* 486:01e / DPB1\*  
 487:01e / DPB1\* 497:01e / DPB1\* 500:01e /  
 DPB1\* 520:01e / DPB1\* 521:01e / DPB1\*  
 522:01e / DPB1\* 524:01e / DPB1\* 529:01e /  
 DPB1\* 553:01e / DPB1\* 554:01e / DPB1\*  
 556:01e / DPB1\* 559:01e / DPB1\* 569:01e /  
 DPB1\* 575:01e / DPB1\* 578:01e / DPB1\*  
 583:01e / DPB1\* 591:01e / DPB1\* 593:01e /  
 DPB1\* 607:01e / DPB1\* 614:01e / DPB1\*  
 625:01e / DPB1\* 643:01e / DPB1\* 658:01e /  
 DPB1\* 666:01e / DPB1\* 682:01e / DPB1\*  
 683:01e / DPB1\* 694:01e / DPB1\* 722:01e /  
 DPB1\* 739:01e / DPB1\* 742:01e / DPB1\*  
 750:01e / DPB1\* 754:01Ne / DPB1\*  
 756:01Ne / DPB1\* 758:01e / DPB1\* 761:01e /  
 DPB1\* 769:01e / DPB1\* 772:01e / DPB1\*  
 773:01e / DPB1\* 788:01e / DPB1\* 795:01e /  
 DPB1\* 803:01e / DPB1\* 808:01e / DPB1\*  
 811:01e / DPB1\* 812:01e / DPB1\* 814:01e /  
 DPB1\* 837:01e / DPB1\* 842:01e / DPB1\*  
 852:01e / DPB1\* 878:01Ne / DPB1\* 895:01e /  
 DPB1\* 915:01e / DPB1\* 957:01e / DPB1\*  
 966:01e / DPB1\* 974:01Ne / DPB1\* 993:01e /  
 DPB1\* 1040:01e / DPB1\* 1042:01e / DPB1\*  
 1048:01e / DPB1\* 1060:01e / DPB1\*  
 1062:01e / DPB1\* 1064:01e / DPB1\*  
 1066:01e / DPB1\* 1108:01e / DPB1\*  
 1112:01Ne / DPB1\* 1113:01e / DPB1\*  
 1121:01Ne / DPB1\* 1139:01e / DPB1\*  
 1167:01e

**EDP753**

DPB1\* 753:01e

-

FFQG

EEFA

AAE

ILEEK

M

GGPM

1 rare

*One side of this epitope requires a RARE allele, review results to confirm assignment.*

OR

| EPITYPE                              | ALLELES                                                                                                                                                                                                                                                           | P GROUP                                 | HVR-A | HVR-B | HVR-C | HVR-D | HVR-E | HVR-F |
|--------------------------------------|-------------------------------------------------------------------------------------------------------------------------------------------------------------------------------------------------------------------------------------------------------------------|-----------------------------------------|-------|-------|-------|-------|-------|-------|
| <b>EDP04</b><br>1 common<br>291 rare | DPB1* 04:01:01:01, 04:01:01:02e,<br>04:01:01:03e, 04:01:01:04e, 04:01:01:05e,<br>04:01:01:06e, 04:01:01:07e, 04:01:01:08e,<br>04:01:01:09e, 04:01:01:10e, 04:01:01:11e,<br>04:01:01:12e, 04:01:01:13e, 04:01:01:14e,<br>04:01:01:15e, 04:01:01:16e, 04:01:01:17e, | 04:01P<br>213:01P<br>334:01P<br>523:01P | LFQG  | EEFA  | AAE   | ILEEK | M     | GGPM  |

04:01:01:18e, 04:01:01:19e, 04:01:01:20e,  
04:01:01:21e, 04:01:01:22e, 04:01:01:23e,  
04:01:01:25e, 04:01:01:26e, 04:01:01:27e,  
04:01:01:28e, 04:01:01:29e, 04:01:01:30e,  
04:01:01:31e, 04:01:01:32e, 04:01:01:33e,  
04:01:01:34e, 04:01:01:35e, 04:01:01:36e,  
04:01:01:37e, 04:01:01:38e, 04:01:01:39e,  
04:01:01:40e, 04:01:01:41e, 04:01:01:42e,  
04:01:01:43e, 04:01:01:44e, 04:01:01:45e,  
04:01:01:46e, 04:01:01:47e, 04:01:01:48e,  
04:01:01:49e, 04:01:01:50e, 04:01:01:51e,  
04:01:01:52e, 04:01:01:53e, 04:01:02e,  
04:01:03e, 04:01:04:01e, 04:01:04:02e,  
04:01:05e, 04:01:06e, 04:01:07e, 04:01:08e,  
04:01:09e, 04:01:10e, 04:01:11e, 04:01:12e,  
04:01:13e, 04:01:14e, 04:01:15e, 04:01:16e,  
04:01:17e, 04:01:18e, 04:01:19e, 04:01:20e,  
04:01:21e, 04:01:22e, 04:01:23e, 04:01:24e,  
04:01:25e, 04:01:26e, 04:01:27e, 04:01:28e,  
04:01:29e, 04:01:30e, 04:01:31e, 04:01:32e,  
04:01:33e, 04:01:34e, 04:01:35e, 04:01:36e,  
04:01:37:01e, 04:01:37:02e, 04:01:38e,  
04:01:39:01e, 04:01:39:02e, 04:01:40e,  
04:01:41e, 04:01:42e, 04:01:43e, 04:01:44e,  
04:01:45e, 04:01:46e, 04:01:47e, 04:01:48e,  
04:01:49e, 04:01:50e / DPB1\* 213:01:01e,  
213:01:02e / DPB1\* 334:01:01e, 334:01:02e /  
DPB1\* 350:01e / DPB1\* 415:01e / DPB1\*  
459:01e / DPB1\* 464:01e / DPB1\*  
523:01:01e, 523:01:02e / DPB1\* 534:01e /  
DPB1\* 615:01e / DPB1\* 618:01e / DPB1\*  
670:01e / DPB1\* 677:01e / DPB1\* 699:01e /  
DPB1\* 755:01e / DPB1\* 757:01e / DPB1\*  
765:01e / DPB1\* 767:01e / DPB1\* 784:01e /  
DPB1\* 804:01e / DPB1\* 806:01:01:01e,  
806:01:01:02e / DPB1\* 813:01e / DPB1\*  
820:01e / DPB1\* 824:01:01e, 824:01:02e /  
DPB1\* 826:01e / DPB1\* 850:01e / DPB1\*  
859:01e / DPB1\* 880:01e / DPB1\* 882:01e /  
DPB1\* 926:01e / DPB1\* 932:01e / DPB1\*  
939:01e / DPB1\* 978:01e / DPB1\* 988:01e /  
DPB1\* 989:01e / DPB1\* 992:01e / DPB1\*  
997:01e / DPB1\* 1001:01e / DPB1\*  
1002:01e / DPB1\* 1003:01e / DPB1\*  
1004:01e / DPB1\* 1010:01e / DPB1\*  
1011:01e / DPB1\* 1023:01e / DPB1\*  
1033:01e / DPB1\* 1074:01e / DPB1\*  
1086:01e / DPB1\* 1091:01e / DPB1\*  
1100:01e / DPB1\* 1129:01e / DPB1\*  
1132:01e / DPB1\* 1146:01e / DPB1\*  
1148:01Qe / DPB1\* 1152:01e / DPB1\*  
1155:01e / DPB1\* 1161:01e / DPB1\*  
1164:01e

DPB1\* 04:01:01:24Ne / DPB1\* 99:01e /  
DPB1\* 120:01Ne / DPB1\* 121:01e / DPB1\*  
128:01e / DPB1\* 134:01e / DPB1\* 149:01e /  
DPB1\* 169:01e / DPB1\* 174:01e / DPB1\*  
175:01e / DPB1\* 180:01e / DPB1\* 181:01e /  
DPB1\* 192:01e / DPB1\* 193:01e / DPB1\*  
194:01e / DPB1\* 195:01e / DPB1\* 212:01e /  
DPB1\* 224:01e / DPB1\* 225:01e / DPB1\*  
228:01e / DPB1\* 231:01e / DPB1\* 232:01e /  
DPB1\* 240:01e / DPB1\* 253:01e / DPB1\*  
255:01e / DPB1\* 262:01e / DPB1\* 272:01e /  
DPB1\* 275:01e / DPB1\* 276:01e / DPB1\*

-

281:01e / DPB1\* 282:01e / DPB1\* 283:01e /  
 DPB1\* 298:01e / DPB1\* 320:01e / DPB1\*  
 323:01e / DPB1\* 335:01e / DPB1\* 336:01e /  
 DPB1\* 341:01e / DPB1\* 356:01e / DPB1\*  
 360:01e / DPB1\* 372:01e / DPB1\* 376:01e /  
 DPB1\* 378:01e / DPB1\* 396:01e / DPB1\*  
 397:01e / DPB1\* 418:01e / DPB1\* 425:01e /  
 DPB1\* 426:01e / DPB1\* 428:01e / DPB1\*  
 434:01e / DPB1\* 453:01e / DPB1\* 455:01Ne /  
 DPB1\* 465:01e / DPB1\* 468:01e / DPB1\*  
 475:01e / DPB1\* 476:01e / DPB1\* 479:01e /  
 DPB1\* 485:01e / DPB1\* 486:01e / DPB1\*  
 487:01e / DPB1\* 497:01e / DPB1\* 500:01e /  
 DPB1\* 520:01e / DPB1\* 521:01e / DPB1\*  
 522:01e / DPB1\* 524:01e / DPB1\* 529:01e /  
 DPB1\* 553:01e / DPB1\* 554:01e / DPB1\*  
 556:01e / DPB1\* 559:01e / DPB1\* 569:01e /  
 DPB1\* 575:01e / DPB1\* 578:01e / DPB1\*  
 583:01e / DPB1\* 591:01e / DPB1\* 593:01e /  
 DPB1\* 607:01e / DPB1\* 614:01e / DPB1\*  
 625:01e / DPB1\* 643:01e / DPB1\* 658:01e /  
 DPB1\* 666:01e / DPB1\* 682:01e / DPB1\*  
 683:01e / DPB1\* 694:01e / DPB1\* 722:01e /  
 DPB1\* 739:01e / DPB1\* 742:01e / DPB1\*  
 750:01e / DPB1\* 754:01Ne / DPB1\*  
 756:01Ne / DPB1\* 758:01e / DPB1\* 761:01e /  
 DPB1\* 769:01e / DPB1\* 772:01e / DPB1\*  
 773:01e / DPB1\* 788:01e / DPB1\* 795:01e /  
 DPB1\* 803:01e / DPB1\* 808:01e / DPB1\*  
 811:01e / DPB1\* 812:01e / DPB1\* 814:01e /  
 DPB1\* 837:01e / DPB1\* 842:01e / DPB1\*  
 852:01e / DPB1\* 878:01Ne / DPB1\* 895:01e /  
 DPB1\* 915:01e / DPB1\* 957:01e / DPB1\*  
 966:01e / DPB1\* 974:01Ne / DPB1\* 993:01e /  
 DPB1\* 1040:01e / DPB1\* 1042:01e / DPB1\*  
 1048:01e / DPB1\* 1060:01e / DPB1\*  
 1062:01e / DPB1\* 1064:01e / DPB1\*  
 1066:01e / DPB1\* 1108:01e / DPB1\*  
 1112:01Ne / DPB1\* 1113:01e / DPB1\*  
 1121:01Ne / DPB1\* 1139:01e / DPB1\*  
 1167:01e

EDP934

DPB1\* 934:01Qe

-

LFQG

EFA

AAE

ILEEK

M

GGPM

1 rare

*One side of this epitope requires a RARE allele, review results to confirm assignment.*

OR

| EPITYPE                       | ALLELES                                                                                                                                                                                                                                                                                                                                                                                                                                                                                                                                         | P GROUP                                 | HVR-A | HVR-B | HVR-C | HVR-D | HVR-E | HVR-F |
|-------------------------------|-------------------------------------------------------------------------------------------------------------------------------------------------------------------------------------------------------------------------------------------------------------------------------------------------------------------------------------------------------------------------------------------------------------------------------------------------------------------------------------------------------------------------------------------------|-----------------------------------------|-------|-------|-------|-------|-------|-------|
| EDP04<br>1 common<br>291 rare | DPB1* 04:01:01:01, 04:01:01:02e,<br>04:01:01:03e, 04:01:01:04e, 04:01:01:05e,<br>04:01:01:06e, 04:01:01:07e, 04:01:01:08e,<br>04:01:01:09e, 04:01:01:10e, 04:01:01:11e,<br>04:01:01:12e, 04:01:01:13e, 04:01:01:14e,<br>04:01:01:15e, 04:01:01:16e, 04:01:01:17e,<br>04:01:01:18e, 04:01:01:19e, 04:01:01:20e,<br>04:01:01:21e, 04:01:01:22e, 04:01:01:23e,<br>04:01:01:25e, 04:01:01:26e, 04:01:01:27e,<br>04:01:01:28e, 04:01:01:29e, 04:01:01:30e,<br>04:01:01:31e, 04:01:01:32e, 04:01:01:33e,<br>04:01:01:34e, 04:01:01:35e, 04:01:01:36e, | 04:01P<br>213:01P<br>334:01P<br>523:01P | LFQG  | EEFA  | AAE   | ILEEK | M     | GGPM  |



04:01:01:37e, 04:01:01:38e, 04:01:01:39e,  
04:01:01:40e, 04:01:01:41e, 04:01:01:42e,  
04:01:01:43e, 04:01:01:44e, 04:01:01:45e,  
04:01:01:46e, 04:01:01:47e, 04:01:01:48e,  
04:01:01:49e, 04:01:01:50e, 04:01:01:51e,  
04:01:01:52e, 04:01:01:53e, 04:01:02e,  
04:01:03e, 04:01:04:01e, 04:01:04:02e,  
04:01:05e, 04:01:06e, 04:01:07e, 04:01:08e,  
04:01:09e, 04:01:10e, 04:01:11e, 04:01:12e,  
04:01:13e, 04:01:14e, 04:01:15e, 04:01:16e,  
04:01:17e, 04:01:18e, 04:01:19e, 04:01:20e,  
04:01:21e, 04:01:22e, 04:01:23e, 04:01:24e,  
04:01:25e, 04:01:26e, 04:01:27e, 04:01:28e,  
04:01:29e, 04:01:30e, 04:01:31e, 04:01:32e,  
04:01:33e, 04:01:34e, 04:01:35e, 04:01:36e,  
04:01:37:01e, 04:01:37:02e, 04:01:38e,  
04:01:39:01e, 04:01:39:02e, 04:01:40e,  
04:01:41e, 04:01:42e, 04:01:43e, 04:01:44e,  
04:01:45e, 04:01:46e, 04:01:47e, 04:01:48e,  
04:01:49e, 04:01:50e / DPB1\* 213:01:01e,  
213:01:02e / DPB1\* 334:01:01e, 334:01:02e /  
DPB1\* 350:01e / DPB1\* 415:01e / DPB1\*  
459:01e / DPB1\* 464:01e / DPB1\*  
523:01:01e, 523:01:02e / DPB1\* 534:01e /  
DPB1\* 615:01e / DPB1\* 618:01e / DPB1\*  
670:01e / DPB1\* 677:01e / DPB1\* 699:01e /  
DPB1\* 755:01e / DPB1\* 757:01e / DPB1\*  
765:01e / DPB1\* 767:01e / DPB1\* 784:01e /  
DPB1\* 804:01e / DPB1\* 806:01:01:01e,  
806:01:01:02e / DPB1\* 813:01e / DPB1\*  
820:01e / DPB1\* 824:01:01e, 824:01:02e /  
DPB1\* 826:01e / DPB1\* 850:01e / DPB1\*  
859:01e / DPB1\* 880:01e / DPB1\* 882:01e /  
DPB1\* 926:01e / DPB1\* 932:01e / DPB1\*  
939:01e / DPB1\* 978:01e / DPB1\* 988:01e /  
DPB1\* 989:01e / DPB1\* 992:01e / DPB1\*  
997:01e / DPB1\* 1001:01e / DPB1\*  
1002:01e / DPB1\* 1003:01e / DPB1\*  
1004:01e / DPB1\* 1010:01e / DPB1\*  
1011:01e / DPB1\* 1023:01e / DPB1\*  
1033:01e / DPB1\* 1074:01e / DPB1\*  
1086:01e / DPB1\* 1091:01e / DPB1\*  
1100:01e / DPB1\* 1129:01e / DPB1\*  
1132:01e / DPB1\* 1146:01e / DPB1\*  
1148:01Qe / DPB1\* 1152:01e / DPB1\*  
1155:01e / DPB1\* 1161:01e / DPB1\*  
1164:01e

DPB1\* 04:01:01:24Ne / DPB1\* 99:01e /  
DPB1\* 120:01Ne / DPB1\* 121:01e / DPB1\*  
128:01e / DPB1\* 134:01e / DPB1\* 149:01e /  
DPB1\* 169:01e / DPB1\* 174:01e / DPB1\*  
175:01e / DPB1\* 180:01e / DPB1\* 181:01e /  
DPB1\* 192:01e / DPB1\* 193:01e / DPB1\*  
194:01e / DPB1\* 195:01e / DPB1\* 212:01e /  
DPB1\* 224:01e / DPB1\* 225:01e / DPB1\*  
228:01e / DPB1\* 231:01e / DPB1\* 232:01e /  
DPB1\* 240:01e / DPB1\* 253:01e / DPB1\*  
255:01e / DPB1\* 262:01e / DPB1\* 272:01e /  
DPB1\* 275:01e / DPB1\* 276:01e / DPB1\*  
281:01e / DPB1\* 282:01e / DPB1\* 283:01e /  
DPB1\* 298:01e / DPB1\* 320:01e / DPB1\*  
323:01e / DPB1\* 335:01e / DPB1\* 336:01e /  
DPB1\* 341:01e / DPB1\* 356:01e / DPB1\*  
360:01e / DPB1\* 372:01e / DPB1\* 376:01e /  
DPB1\* 378:01e / DPB1\* 396:01e / DPB1\*

-

397:01e / DPB1\* 418:01e / DPB1\* 425:01e /  
 DPB1\* 426:01e / DPB1\* 428:01e / DPB1\*  
 434:01e / DPB1\* 453:01e / DPB1\* 455:01Ne /  
 DPB1\* 465:01e / DPB1\* 468:01e / DPB1\*  
 475:01e / DPB1\* 476:01e / DPB1\* 479:01e /  
 DPB1\* 485:01e / DPB1\* 486:01e / DPB1\*  
 487:01e / DPB1\* 497:01e / DPB1\* 500:01e /  
 DPB1\* 520:01e / DPB1\* 521:01e / DPB1\*  
 522:01e / DPB1\* 524:01e / DPB1\* 529:01e /  
 DPB1\* 553:01e / DPB1\* 554:01e / DPB1\*  
 556:01e / DPB1\* 559:01e / DPB1\* 569:01e /  
 DPB1\* 575:01e / DPB1\* 578:01e / DPB1\*  
 583:01e / DPB1\* 591:01e / DPB1\* 593:01e /  
 DPB1\* 607:01e / DPB1\* 614:01e / DPB1\*  
 625:01e / DPB1\* 643:01e / DPB1\* 658:01e /  
 DPB1\* 666:01e / DPB1\* 682:01e / DPB1\*  
 683:01e / DPB1\* 694:01e / DPB1\* 722:01e /  
 DPB1\* 739:01e / DPB1\* 742:01e / DPB1\*  
 750:01e / DPB1\* 754:01Ne / DPB1\*  
 756:01Ne / DPB1\* 758:01e / DPB1\* 761:01e /  
 DPB1\* 769:01e / DPB1\* 772:01e / DPB1\*  
 773:01e / DPB1\* 788:01e / DPB1\* 795:01e /  
 DPB1\* 803:01e / DPB1\* 808:01e / DPB1\*  
 811:01e / DPB1\* 812:01e / DPB1\* 814:01e /  
 DPB1\* 837:01e / DPB1\* 842:01e / DPB1\*  
 852:01e / DPB1\* 878:01Ne / DPB1\* 895:01e /  
 DPB1\* 915:01e / DPB1\* 957:01e / DPB1\*  
 966:01e / DPB1\* 974:01Ne / DPB1\* 993:01e /  
 DPB1\* 1040:01e / DPB1\* 1042:01e / DPB1\*  
 1048:01e / DPB1\* 1060:01e / DPB1\*  
 1062:01e / DPB1\* 1064:01e / DPB1\*  
 1066:01e / DPB1\* 1108:01e / DPB1\*  
 1112:01Ne / DPB1\* 1113:01e / DPB1\*  
 1121:01Ne / DPB1\* 1139:01e / DPB1\*  
 1167:01e

EDP874

DPB1\* 874:01Ne

-

LFQG

EEFA

AAE

ILEEK

C

-

1 rare

*One side of this epitope requires a RARE allele, review results to confirm assignment.*

OR

| EPITYPE                       | ALLELES                                                                                                                                                                                                                                                                                                                                                                                                                                                                                                                                                                                                                                                                                                                                                                                                                    | P GROUP                                 | HVR-A | HVR-B | HVR-C | HVR-D | HVR-E | HVR-F |
|-------------------------------|----------------------------------------------------------------------------------------------------------------------------------------------------------------------------------------------------------------------------------------------------------------------------------------------------------------------------------------------------------------------------------------------------------------------------------------------------------------------------------------------------------------------------------------------------------------------------------------------------------------------------------------------------------------------------------------------------------------------------------------------------------------------------------------------------------------------------|-----------------------------------------|-------|-------|-------|-------|-------|-------|
| EDP04<br>1 common<br>291 rare | DPB1* 04:01:01:01, 04:01:01:02e,<br>04:01:01:03e, 04:01:01:04e, 04:01:01:05e,<br>04:01:01:06e, 04:01:01:07e, 04:01:01:08e,<br>04:01:01:09e, 04:01:01:10e, 04:01:01:11e,<br>04:01:01:12e, 04:01:01:13e, 04:01:01:14e,<br>04:01:01:15e, 04:01:01:16e, 04:01:01:17e,<br>04:01:01:18e, 04:01:01:19e, 04:01:01:20e,<br>04:01:01:21e, 04:01:01:22e, 04:01:01:23e,<br>04:01:01:25e, 04:01:01:26e, 04:01:01:27e,<br>04:01:01:28e, 04:01:01:29e, 04:01:01:30e,<br>04:01:01:31e, 04:01:01:32e, 04:01:01:33e,<br>04:01:01:34e, 04:01:01:35e, 04:01:01:36e,<br>04:01:01:37e, 04:01:01:38e, 04:01:01:39e,<br>04:01:01:40e, 04:01:01:41e, 04:01:01:42e,<br>04:01:01:43e, 04:01:01:44e, 04:01:01:45e,<br>04:01:01:46e, 04:01:01:47e, 04:01:01:48e,<br>04:01:01:49e, 04:01:01:50e, 04:01:01:51e,<br>04:01:01:52e, 04:01:01:53e, 04:01:02e, | 04:01P<br>213:01P<br>334:01P<br>523:01P | LFQG  | EEFA  | AAE   | ILEEK | M     | GGPM  |

04:01:03e, 04:01:04:01e, 04:01:04:02e,  
04:01:05e, 04:01:06e, 04:01:07e, 04:01:08e,  
04:01:09e, 04:01:10e, 04:01:11e, 04:01:12e,  
04:01:13e, 04:01:14e, 04:01:15e, 04:01:16e,  
04:01:17e, 04:01:18e, 04:01:19e, 04:01:20e,  
04:01:21e, 04:01:22e, 04:01:23e, 04:01:24e,  
04:01:25e, 04:01:26e, 04:01:27e, 04:01:28e,  
04:01:29e, 04:01:30e, 04:01:31e, 04:01:32e,  
04:01:33e, 04:01:34e, 04:01:35e, 04:01:36e,  
04:01:37:01e, 04:01:37:02e, 04:01:38e,  
04:01:39:01e, 04:01:39:02e, 04:01:40e,  
04:01:41e, 04:01:42e, 04:01:43e, 04:01:44e,  
04:01:45e, 04:01:46e, 04:01:47e, 04:01:48e,  
04:01:49e, 04:01:50e / DPB1\* 213:01:01e,  
213:01:02e / DPB1\* 334:01:01e, 334:01:02e /  
DPB1\* 350:01e / DPB1\* 415:01e / DPB1\*  
459:01e / DPB1\* 464:01e / DPB1\*  
523:01:01e, 523:01:02e / DPB1\* 534:01e /  
DPB1\* 615:01e / DPB1\* 618:01e / DPB1\*  
670:01e / DPB1\* 677:01e / DPB1\* 699:01e /  
DPB1\* 755:01e / DPB1\* 757:01e / DPB1\*  
765:01e / DPB1\* 767:01e / DPB1\* 784:01e /  
DPB1\* 804:01e / DPB1\* 806:01:01:01e,  
806:01:01:02e / DPB1\* 813:01e / DPB1\*  
820:01e / DPB1\* 824:01:01e, 824:01:02e /  
DPB1\* 826:01e / DPB1\* 850:01e / DPB1\*  
859:01e / DPB1\* 880:01e / DPB1\* 882:01e /  
DPB1\* 926:01e / DPB1\* 932:01e / DPB1\*  
939:01e / DPB1\* 978:01e / DPB1\* 988:01e /  
DPB1\* 989:01e / DPB1\* 992:01e / DPB1\*  
997:01e / DPB1\* 1001:01e / DPB1\*  
1002:01e / DPB1\* 1003:01e / DPB1\*  
1004:01e / DPB1\* 1010:01e / DPB1\*  
1011:01e / DPB1\* 1023:01e / DPB1\*  
1033:01e / DPB1\* 1074:01e / DPB1\*  
1086:01e / DPB1\* 1091:01e / DPB1\*  
1100:01e / DPB1\* 1129:01e / DPB1\*  
1132:01e / DPB1\* 1146:01e / DPB1\*  
1148:01Qe / DPB1\* 1152:01e / DPB1\*  
1155:01e / DPB1\* 1161:01e / DPB1\*  
1164:01e

DPB1\* 04:01:01:24Ne / DPB1\* 99:01e /  
DPB1\* 120:01Ne / DPB1\* 121:01e / DPB1\*  
128:01e / DPB1\* 134:01e / DPB1\* 149:01e /  
DPB1\* 169:01e / DPB1\* 174:01e / DPB1\*  
175:01e / DPB1\* 180:01e / DPB1\* 181:01e /  
DPB1\* 192:01e / DPB1\* 193:01e / DPB1\*  
194:01e / DPB1\* 195:01e / DPB1\* 212:01e /  
DPB1\* 224:01e / DPB1\* 225:01e / DPB1\*  
228:01e / DPB1\* 231:01e / DPB1\* 232:01e /  
DPB1\* 240:01e / DPB1\* 253:01e / DPB1\*  
255:01e / DPB1\* 262:01e / DPB1\* 272:01e /  
DPB1\* 275:01e / DPB1\* 276:01e / DPB1\*  
281:01e / DPB1\* 282:01e / DPB1\* 283:01e /  
DPB1\* 298:01e / DPB1\* 320:01e / DPB1\*  
323:01e / DPB1\* 335:01e / DPB1\* 336:01e /  
DPB1\* 341:01e / DPB1\* 356:01e / DPB1\*  
360:01e / DPB1\* 372:01e / DPB1\* 376:01e /  
DPB1\* 378:01e / DPB1\* 396:01e / DPB1\*  
397:01e / DPB1\* 418:01e / DPB1\* 425:01e /  
DPB1\* 426:01e / DPB1\* 428:01e / DPB1\*  
434:01e / DPB1\* 453:01e / DPB1\* 455:01Ne /  
DPB1\* 465:01e / DPB1\* 468:01e / DPB1\*  
475:01e / DPB1\* 476:01e / DPB1\* 479:01e /  
DPB1\* 485:01e / DPB1\* 486:01e / DPB1\*

-

487:01e / DPB1\* 497:01e / DPB1\* 500:01e /  
 DPB1\* 520:01e / DPB1\* 521:01e / DPB1\*  
 522:01e / DPB1\* 524:01e / DPB1\* 529:01e /  
 DPB1\* 553:01e / DPB1\* 554:01e / DPB1\*  
 556:01e / DPB1\* 559:01e / DPB1\* 569:01e /  
 DPB1\* 575:01e / DPB1\* 578:01e / DPB1\*  
 583:01e / DPB1\* 591:01e / DPB1\* 593:01e /  
 DPB1\* 607:01e / DPB1\* 614:01e / DPB1\*  
 625:01e / DPB1\* 643:01e / DPB1\* 658:01e /  
 DPB1\* 666:01e / DPB1\* 682:01e / DPB1\*  
 683:01e / DPB1\* 694:01e / DPB1\* 722:01e /  
 DPB1\* 739:01e / DPB1\* 742:01e / DPB1\*  
 750:01e / DPB1\* 754:01Ne / DPB1\*  
 756:01Ne / DPB1\* 758:01e / DPB1\* 761:01e /  
 DPB1\* 769:01e / DPB1\* 772:01e / DPB1\*  
 773:01e / DPB1\* 788:01e / DPB1\* 795:01e /  
 DPB1\* 803:01e / DPB1\* 808:01e / DPB1\*  
 811:01e / DPB1\* 812:01e / DPB1\* 814:01e /  
 DPB1\* 837:01e / DPB1\* 842:01e / DPB1\*  
 852:01e / DPB1\* 878:01Ne / DPB1\* 895:01e /  
 DPB1\* 915:01e / DPB1\* 957:01e / DPB1\*  
 966:01e / DPB1\* 974:01Ne / DPB1\* 993:01e /  
 DPB1\* 1040:01e / DPB1\* 1042:01e / DPB1\*  
 1048:01e / DPB1\* 1060:01e / DPB1\*  
 1062:01e / DPB1\* 1064:01e / DPB1\*  
 1066:01e / DPB1\* 1108:01e / DPB1\*  
 1112:01Ne / DPB1\* 1113:01e / DPB1\*  
 1121:01Ne / DPB1\* 1139:01e / DPB1\*  
 1167:01e

**EDP254**

DPB1\* 254:01e

-

LFQG

EEFA

**AVE**

ILEEK

M

GGPM

1 rare

*One side of this epitope requires a RARE allele, review results to confirm assignment.*

**OR**

| EPITYPE                              | ALLELES                                                                                                                                                                                                                                                                                                                                                                                                                                                                                                                                                                                                                                                                                                                                                                                                                                                                                                                                                                                                                                                                                                                 | P GROUP                                 | HVR-A | HVR-B | HVR-C | HVR-D | HVR-E | HVR-F |
|--------------------------------------|-------------------------------------------------------------------------------------------------------------------------------------------------------------------------------------------------------------------------------------------------------------------------------------------------------------------------------------------------------------------------------------------------------------------------------------------------------------------------------------------------------------------------------------------------------------------------------------------------------------------------------------------------------------------------------------------------------------------------------------------------------------------------------------------------------------------------------------------------------------------------------------------------------------------------------------------------------------------------------------------------------------------------------------------------------------------------------------------------------------------------|-----------------------------------------|-------|-------|-------|-------|-------|-------|
| <b>EDP04</b><br>1 common<br>291 rare | DPB1* <b>04:01:01:01</b> , 04:01:01:02e,<br>04:01:01:03e, 04:01:01:04e, 04:01:01:05e,<br>04:01:01:06e, 04:01:01:07e, 04:01:01:08e,<br>04:01:01:09e, 04:01:01:10e, 04:01:01:11e,<br>04:01:01:12e, 04:01:01:13e, 04:01:01:14e,<br>04:01:01:15e, 04:01:01:16e, 04:01:01:17e,<br>04:01:01:18e, 04:01:01:19e, 04:01:01:20e,<br>04:01:01:21e, 04:01:01:22e, 04:01:01:23e,<br>04:01:01:25e, 04:01:01:26e, 04:01:01:27e,<br>04:01:01:28e, 04:01:01:29e, 04:01:01:30e,<br>04:01:01:31e, 04:01:01:32e, 04:01:01:33e,<br>04:01:01:34e, 04:01:01:35e, 04:01:01:36e,<br>04:01:01:37e, 04:01:01:38e, 04:01:01:39e,<br>04:01:01:40e, 04:01:01:41e, 04:01:01:42e,<br>04:01:01:43e, 04:01:01:44e, 04:01:01:45e,<br>04:01:01:46e, 04:01:01:47e, 04:01:01:48e,<br>04:01:01:49e, 04:01:01:50e, 04:01:01:51e,<br>04:01:01:52e, 04:01:01:53e, 04:01:02e,<br>04:01:03e, 04:01:04:01e, 04:01:04:02e,<br>04:01:05e, 04:01:06e, 04:01:07e, 04:01:08e,<br>04:01:09e, 04:01:10e, 04:01:11e, 04:01:12e,<br>04:01:13e, 04:01:14e, 04:01:15e, 04:01:16e,<br>04:01:17e, 04:01:18e, 04:01:19e, 04:01:20e,<br>04:01:21e, 04:01:22e, 04:01:23e, 04:01:24e, | 04:01P<br>213:01P<br>334:01P<br>523:01P | LFQG  | EEFA  | AAE   | ILEEK | M     | GGPM  |

04:01:25e, 04:01:26e, 04:01:27e, 04:01:28e,  
04:01:29e, 04:01:30e, 04:01:31e, 04:01:32e,  
04:01:33e, 04:01:34e, 04:01:35e, 04:01:36e,  
04:01:37:01e, 04:01:37:02e, 04:01:38e,  
04:01:39:01e, 04:01:39:02e, 04:01:40e,  
04:01:41e, 04:01:42e, 04:01:43e, 04:01:44e,  
04:01:45e, 04:01:46e, 04:01:47e, 04:01:48e,  
04:01:49e, 04:01:50e / DPB1\* 213:01:01e,  
213:01:02e / DPB1\* 334:01:01e, 334:01:02e /  
DPB1\* 350:01e / DPB1\* 415:01e / DPB1\*  
459:01e / DPB1\* 464:01e / DPB1\*  
523:01:01e, 523:01:02e / DPB1\* 534:01e /  
DPB1\* 615:01e / DPB1\* 618:01e / DPB1\*  
670:01e / DPB1\* 677:01e / DPB1\* 699:01e /  
DPB1\* 755:01e / DPB1\* 757:01e / DPB1\*  
765:01e / DPB1\* 767:01e / DPB1\* 784:01e /  
DPB1\* 804:01e / DPB1\* 806:01:01:01e,  
806:01:01:02e / DPB1\* 813:01e / DPB1\*  
820:01e / DPB1\* 824:01:01e, 824:01:02e /  
DPB1\* 826:01e / DPB1\* 850:01e / DPB1\*  
859:01e / DPB1\* 880:01e / DPB1\* 882:01e /  
DPB1\* 926:01e / DPB1\* 932:01e / DPB1\*  
939:01e / DPB1\* 978:01e / DPB1\* 988:01e /  
DPB1\* 989:01e / DPB1\* 992:01e / DPB1\*  
997:01e / DPB1\* 1001:01e / DPB1\*  
1002:01e / DPB1\* 1003:01e / DPB1\*  
1004:01e / DPB1\* 1010:01e / DPB1\*  
1011:01e / DPB1\* 1023:01e / DPB1\*  
1033:01e / DPB1\* 1074:01e / DPB1\*  
1086:01e / DPB1\* 1091:01e / DPB1\*  
1100:01e / DPB1\* 1129:01e / DPB1\*  
1132:01e / DPB1\* 1146:01e / DPB1\*  
1148:01:01e / DPB1\* 1152:01e / DPB1\*  
1155:01e / DPB1\* 1161:01e / DPB1\*  
1164:01e

DPB1\* 04:01:01:24Ne / DPB1\* 99:01e /  
DPB1\* 120:01Ne / DPB1\* 121:01e / DPB1\*  
128:01e / DPB1\* 134:01e / DPB1\* 149:01e /  
DPB1\* 169:01e / DPB1\* 174:01e / DPB1\*  
175:01e / DPB1\* 180:01e / DPB1\* 181:01e /  
DPB1\* 192:01e / DPB1\* 193:01e / DPB1\*  
194:01e / DPB1\* 195:01e / DPB1\* 212:01e /  
DPB1\* 224:01e / DPB1\* 225:01e / DPB1\*  
228:01e / DPB1\* 231:01e / DPB1\* 232:01e /  
DPB1\* 240:01e / DPB1\* 253:01e / DPB1\*  
255:01e / DPB1\* 262:01e / DPB1\* 272:01e /  
DPB1\* 275:01e / DPB1\* 276:01e / DPB1\*  
281:01e / DPB1\* 282:01e / DPB1\* 283:01e /  
DPB1\* 298:01e / DPB1\* 320:01e / DPB1\*  
323:01e / DPB1\* 335:01e / DPB1\* 336:01e /  
DPB1\* 341:01e / DPB1\* 356:01e / DPB1\*  
360:01e / DPB1\* 372:01e / DPB1\* 376:01e /  
DPB1\* 378:01e / DPB1\* 396:01e / DPB1\*  
397:01e / DPB1\* 418:01e / DPB1\* 425:01e /  
DPB1\* 426:01e / DPB1\* 428:01e / DPB1\*  
434:01e / DPB1\* 453:01e / DPB1\* 455:01Ne /  
DPB1\* 465:01e / DPB1\* 468:01e / DPB1\*  
475:01e / DPB1\* 476:01e / DPB1\* 479:01e /  
DPB1\* 485:01e / DPB1\* 486:01e / DPB1\*  
487:01e / DPB1\* 497:01e / DPB1\* 500:01e /  
DPB1\* 520:01e / DPB1\* 521:01e / DPB1\*  
522:01e / DPB1\* 524:01e / DPB1\* 529:01e /  
DPB1\* 553:01e / DPB1\* 554:01e / DPB1\*  
556:01e / DPB1\* 559:01e / DPB1\* 569:01e /  
DPB1\* 575:01e / DPB1\* 578:01e / DPB1\*

-

583:01e / DPB1\* 591:01e / DPB1\* 593:01e /  
 DPB1\* 607:01e / DPB1\* 614:01e / DPB1\*  
 625:01e / DPB1\* 643:01e / DPB1\* 658:01e /  
 DPB1\* 666:01e / DPB1\* 682:01e / DPB1\*  
 683:01e / DPB1\* 694:01e / DPB1\* 722:01e /  
 DPB1\* 739:01e / DPB1\* 742:01e / DPB1\*  
 750:01e / DPB1\* 754:01Ne / DPB1\*  
 756:01Ne / DPB1\* 758:01e / DPB1\* 761:01e /  
 DPB1\* 769:01e / DPB1\* 772:01e / DPB1\*  
 773:01e / DPB1\* 788:01e / DPB1\* 795:01e /  
 DPB1\* 803:01e / DPB1\* 808:01e / DPB1\*  
 811:01e / DPB1\* 812:01e / DPB1\* 814:01e /  
 DPB1\* 837:01e / DPB1\* 842:01e / DPB1\*  
 852:01e / DPB1\* 878:01Ne / DPB1\* 895:01e /  
 DPB1\* 915:01e / DPB1\* 957:01e / DPB1\*  
 966:01e / DPB1\* 974:01Ne / DPB1\* 993:01e /  
 DPB1\* 1040:01e / DPB1\* 1042:01e / DPB1\*  
 1048:01e / DPB1\* 1060:01e / DPB1\*  
 1062:01e / DPB1\* 1064:01e / DPB1\*  
 1066:01e / DPB1\* 1108:01e / DPB1\*  
 1112:01Ne / DPB1\* 1113:01e / DPB1\*  
 1121:01Ne / DPB1\* 1139:01e / DPB1\*  
 1167:01e

**EDP454**

DPB1\* 454:01e

-

LFQG

EEFA

AAE

ILEEK

M

**GEPM**

1 rare

*One side of this epitype requires a RARE allele, review results to confirm assignment.*

OR

| EPITYPE                                  | ALLELES                                                                                                                                                                                                                                                                                                                                                                                                                                                                                                                                                                                                                                                                                                                                                                                                                                                                                                                                                                                                                                                                                                                                                                                                                                                                                                                                                                                                 | P GROUP                                 | HVR-A | HVR-B | HVR-C | HVR-D | HVR-E | HVR-F |
|------------------------------------------|---------------------------------------------------------------------------------------------------------------------------------------------------------------------------------------------------------------------------------------------------------------------------------------------------------------------------------------------------------------------------------------------------------------------------------------------------------------------------------------------------------------------------------------------------------------------------------------------------------------------------------------------------------------------------------------------------------------------------------------------------------------------------------------------------------------------------------------------------------------------------------------------------------------------------------------------------------------------------------------------------------------------------------------------------------------------------------------------------------------------------------------------------------------------------------------------------------------------------------------------------------------------------------------------------------------------------------------------------------------------------------------------------------|-----------------------------------------|-------|-------|-------|-------|-------|-------|
| <b>EDP04</b><br><br>1 common<br>291 rare | <b>DPB1* 04:01:01:01</b> , 04:01:01:02e,<br>04:01:01:03e, 04:01:01:04e, 04:01:01:05e,<br>04:01:01:06e, 04:01:01:07e, 04:01:01:08e,<br>04:01:01:09e, 04:01:01:10e, 04:01:01:11e,<br>04:01:01:12e, 04:01:01:13e, 04:01:01:14e,<br>04:01:01:15e, 04:01:01:16e, 04:01:01:17e,<br>04:01:01:18e, 04:01:01:19e, 04:01:01:20e,<br>04:01:01:21e, 04:01:01:22e, 04:01:01:23e,<br>04:01:01:25e, 04:01:01:26e, 04:01:01:27e,<br>04:01:01:28e, 04:01:01:29e, 04:01:01:30e,<br>04:01:01:31e, 04:01:01:32e, 04:01:01:33e,<br>04:01:01:34e, 04:01:01:35e, 04:01:01:36e,<br>04:01:01:37e, 04:01:01:38e, 04:01:01:39e,<br>04:01:01:40e, 04:01:01:41e, 04:01:01:42e,<br>04:01:01:43e, 04:01:01:44e, 04:01:01:45e,<br>04:01:01:46e, 04:01:01:47e, 04:01:01:48e,<br>04:01:01:49e, 04:01:01:50e, 04:01:01:51e,<br>04:01:01:52e, 04:01:01:53e, 04:01:02e,<br>04:01:03e, 04:01:04:01e, 04:01:04:02e,<br>04:01:05e, 04:01:06e, 04:01:07e, 04:01:08e,<br>04:01:09e, 04:01:10e, 04:01:11e, 04:01:12e,<br>04:01:13e, 04:01:14e, 04:01:15e, 04:01:16e,<br>04:01:17e, 04:01:18e, 04:01:19e, 04:01:20e,<br>04:01:21e, 04:01:22e, 04:01:23e, 04:01:24e,<br>04:01:25e, 04:01:26e, 04:01:27e, 04:01:28e,<br>04:01:29e, 04:01:30e, 04:01:31e, 04:01:32e,<br>04:01:33e, 04:01:34e, 04:01:35e, 04:01:36e,<br>04:01:37:01e, 04:01:37:02e, 04:01:38e,<br>04:01:39:01e, 04:01:39:02e, 04:01:40e,<br>04:01:41e, 04:01:42e, 04:01:43e, 04:01:44e, | 04:01P<br>213:01P<br>334:01P<br>523:01P | LFQG  | EEFA  | AAE   | ILEEK | M     | GGPM  |

04:01:45e, 04:01:46e, 04:01:47e, 04:01:48e,  
04:01:49e, 04:01:50e / DPB1\* 213:01:01e,  
213:01:02e / DPB1\* 334:01:01e, 334:01:02e /  
DPB1\* 350:01e / DPB1\* 415:01e / DPB1\*  
459:01e / DPB1\* 464:01e / DPB1\*  
523:01:01e, 523:01:02e / DPB1\* 534:01e /  
DPB1\* 615:01e / DPB1\* 618:01e / DPB1\*  
670:01e / DPB1\* 677:01e / DPB1\* 699:01e /  
DPB1\* 755:01e / DPB1\* 757:01e / DPB1\*  
765:01e / DPB1\* 767:01e / DPB1\* 784:01e /  
DPB1\* 804:01e / DPB1\* 806:01:01:01e,  
806:01:01:02e / DPB1\* 813:01e / DPB1\*  
820:01e / DPB1\* 824:01:01e, 824:01:02e /  
DPB1\* 826:01e / DPB1\* 850:01e / DPB1\*  
859:01e / DPB1\* 880:01e / DPB1\* 882:01e /  
DPB1\* 926:01e / DPB1\* 932:01e / DPB1\*  
939:01e / DPB1\* 978:01e / DPB1\* 988:01e /  
DPB1\* 989:01e / DPB1\* 992:01e / DPB1\*  
997:01e / DPB1\* 1001:01e / DPB1\*  
1002:01e / DPB1\* 1003:01e / DPB1\*  
1004:01e / DPB1\* 1010:01e / DPB1\*  
1011:01e / DPB1\* 1023:01e / DPB1\*  
1033:01e / DPB1\* 1074:01e / DPB1\*  
1086:01e / DPB1\* 1091:01e / DPB1\*  
1100:01e / DPB1\* 1129:01e / DPB1\*  
1132:01e / DPB1\* 1146:01e / DPB1\*  
1148:01Qe / DPB1\* 1152:01e / DPB1\*  
1155:01e / DPB1\* 1161:01e / DPB1\*  
1164:01e

DPB1\* 04:01:01:24Ne / DPB1\* 99:01e /  
DPB1\* 120:01Ne / DPB1\* 121:01e / DPB1\*  
128:01e / DPB1\* 134:01e / DPB1\* 149:01e /  
DPB1\* 169:01e / DPB1\* 174:01e / DPB1\*  
175:01e / DPB1\* 180:01e / DPB1\* 181:01e /  
DPB1\* 192:01e / DPB1\* 193:01e / DPB1\*  
194:01e / DPB1\* 195:01e / DPB1\* 212:01e /  
DPB1\* 224:01e / DPB1\* 225:01e / DPB1\*  
228:01e / DPB1\* 231:01e / DPB1\* 232:01e /  
DPB1\* 240:01e / DPB1\* 253:01e / DPB1\*  
255:01e / DPB1\* 262:01e / DPB1\* 272:01e /  
DPB1\* 275:01e / DPB1\* 276:01e / DPB1\*  
281:01e / DPB1\* 282:01e / DPB1\* 283:01e /  
DPB1\* 298:01e / DPB1\* 320:01e / DPB1\*  
323:01e / DPB1\* 335:01e / DPB1\* 336:01e /  
DPB1\* 341:01e / DPB1\* 356:01e / DPB1\*  
360:01e / DPB1\* 372:01e / DPB1\* 376:01e /  
DPB1\* 378:01e / DPB1\* 396:01e / DPB1\*  
397:01e / DPB1\* 418:01e / DPB1\* 425:01e /  
DPB1\* 426:01e / DPB1\* 428:01e / DPB1\*  
434:01e / DPB1\* 453:01e / DPB1\* 455:01Ne /  
DPB1\* 465:01e / DPB1\* 468:01e / DPB1\*  
475:01e / DPB1\* 476:01e / DPB1\* 479:01e /  
DPB1\* 485:01e / DPB1\* 486:01e / DPB1\*  
487:01e / DPB1\* 497:01e / DPB1\* 500:01e /  
DPB1\* 520:01e / DPB1\* 521:01e / DPB1\*  
522:01e / DPB1\* 524:01e / DPB1\* 529:01e /  
DPB1\* 553:01e / DPB1\* 554:01e / DPB1\*  
556:01e / DPB1\* 559:01e / DPB1\* 569:01e /  
DPB1\* 575:01e / DPB1\* 578:01e / DPB1\*  
583:01e / DPB1\* 591:01e / DPB1\* 593:01e /  
DPB1\* 607:01e / DPB1\* 614:01e / DPB1\*  
625:01e / DPB1\* 643:01e / DPB1\* 658:01e /  
DPB1\* 666:01e / DPB1\* 682:01e / DPB1\*  
683:01e / DPB1\* 694:01e / DPB1\* 722:01e /  
DPB1\* 739:01e / DPB1\* 742:01e / DPB1\*

-

750:01e / DPB1\* 754:01Ne / DPB1\*  
 756:01Ne / DPB1\* 758:01e / DPB1\* 761:01e /  
 DPB1\* 769:01e / DPB1\* 772:01e / DPB1\*  
 773:01e / DPB1\* 788:01e / DPB1\* 795:01e /  
 DPB1\* 803:01e / DPB1\* 808:01e / DPB1\*  
 811:01e / DPB1\* 812:01e / DPB1\* 814:01e /  
 DPB1\* 837:01e / DPB1\* 842:01e / DPB1\*  
 852:01e / DPB1\* 878:01Ne / DPB1\* 895:01e /  
 DPB1\* 915:01e / DPB1\* 957:01e / DPB1\*  
 966:01e / DPB1\* 974:01Ne / DPB1\* 993:01e /  
 DPB1\* 1040:01e / DPB1\* 1042:01e / DPB1\*  
 1048:01e / DPB1\* 1060:01e / DPB1\*  
 1062:01e / DPB1\* 1064:01e / DPB1\*  
 1066:01e / DPB1\* 1108:01e / DPB1\*  
 1112:01Ne / DPB1\* 1113:01e / DPB1\*  
 1121:01Ne / DPB1\* 1139:01e / DPB1\*  
 1167:01e

**EDP1046**

DPB1\* 1046:01e

-

LFQG

EEIA

AAE

ILEEK

M

GGPM

1 rare

*One side of this epitype requires a RARE allele, review results to confirm assignment.*

OR

| EPITYPE                              | ALLELES                                                                                                                                                                                                                                                                                                                                                                                                                                                                                                                                                                                                                                                                                                                                                                                                                                                                                                                                                                                                                                                                                                                                                                                                                                                                                                                                                                                                                                                                                                                                                                                                                                                                   | P GROUP                                 | HVR-A | HVR-B | HVR-C | HVR-D | HVR-E | HVR-F |
|--------------------------------------|---------------------------------------------------------------------------------------------------------------------------------------------------------------------------------------------------------------------------------------------------------------------------------------------------------------------------------------------------------------------------------------------------------------------------------------------------------------------------------------------------------------------------------------------------------------------------------------------------------------------------------------------------------------------------------------------------------------------------------------------------------------------------------------------------------------------------------------------------------------------------------------------------------------------------------------------------------------------------------------------------------------------------------------------------------------------------------------------------------------------------------------------------------------------------------------------------------------------------------------------------------------------------------------------------------------------------------------------------------------------------------------------------------------------------------------------------------------------------------------------------------------------------------------------------------------------------------------------------------------------------------------------------------------------------|-----------------------------------------|-------|-------|-------|-------|-------|-------|
| <b>EDP04</b><br>1 common<br>291 rare | <b>DPB1* 04:01:01:01</b> , 04:01:01:02e,<br>04:01:01:03e, 04:01:01:04e, 04:01:01:05e,<br>04:01:01:06e, 04:01:01:07e, 04:01:01:08e,<br>04:01:01:09e, 04:01:01:10e, 04:01:01:11e,<br>04:01:01:12e, 04:01:01:13e, 04:01:01:14e,<br>04:01:01:15e, 04:01:01:16e, 04:01:01:17e,<br>04:01:01:18e, 04:01:01:19e, 04:01:01:20e,<br>04:01:01:21e, 04:01:01:22e, 04:01:01:23e,<br>04:01:01:25e, 04:01:01:26e, 04:01:01:27e,<br>04:01:01:28e, 04:01:01:29e, 04:01:01:30e,<br>04:01:01:31e, 04:01:01:32e, 04:01:01:33e,<br>04:01:01:34e, 04:01:01:35e, 04:01:01:36e,<br>04:01:01:37e, 04:01:01:38e, 04:01:01:39e,<br>04:01:01:40e, 04:01:01:41e, 04:01:01:42e,<br>04:01:01:43e, 04:01:01:44e, 04:01:01:45e,<br>04:01:01:46e, 04:01:01:47e, 04:01:01:48e,<br>04:01:01:49e, 04:01:01:50e, 04:01:01:51e,<br>04:01:01:52e, 04:01:01:53e, 04:01:02e,<br>04:01:03e, 04:01:04:01e, 04:01:04:02e,<br>04:01:05e, 04:01:06e, 04:01:07e, 04:01:08e,<br>04:01:09e, 04:01:10e, 04:01:11e, 04:01:12e,<br>04:01:13e, 04:01:14e, 04:01:15e, 04:01:16e,<br>04:01:17e, 04:01:18e, 04:01:19e, 04:01:20e,<br>04:01:21e, 04:01:22e, 04:01:23e, 04:01:24e,<br>04:01:25e, 04:01:26e, 04:01:27e, 04:01:28e,<br>04:01:29e, 04:01:30e, 04:01:31e, 04:01:32e,<br>04:01:33e, 04:01:34e, 04:01:35e, 04:01:36e,<br>04:01:37:01e, 04:01:37:02e, 04:01:38e,<br>04:01:39:01e, 04:01:39:02e, 04:01:40e,<br>04:01:41e, 04:01:42e, 04:01:43e, 04:01:44e,<br>04:01:45e, 04:01:46e, 04:01:47e, 04:01:48e,<br>04:01:49e, 04:01:50e / DPB1* 213:01:01e,<br>213:01:02e / DPB1* 334:01:01e, 334:01:02e /<br>DPB1* 350:01e / DPB1* 415:01e / DPB1*<br>459:01e / DPB1* 464:01e / DPB1*<br>523:01:01e, 523:01:02e / DPB1* 534:01e / | 04:01P<br>213:01P<br>334:01P<br>523:01P | LFQG  | EEFA  | AAE   | ILEEK | M     | GGPM  |



DPB1\* 615:01e / DPB1\* 618:01e / DPB1\*  
670:01e / DPB1\* 677:01e / DPB1\* 699:01e /  
DPB1\* 755:01e / DPB1\* 757:01e / DPB1\*  
765:01e / DPB1\* 767:01e / DPB1\* 784:01e /  
DPB1\* 804:01e / DPB1\* 806:01:01:01e,  
806:01:01:02e / DPB1\* 813:01e / DPB1\*  
820:01e / DPB1\* 824:01:01e, 824:01:02e /  
DPB1\* 826:01e / DPB1\* 850:01e / DPB1\*  
859:01e / DPB1\* 880:01e / DPB1\* 882:01e /  
DPB1\* 926:01e / DPB1\* 932:01e / DPB1\*  
939:01e / DPB1\* 978:01e / DPB1\* 988:01e /  
DPB1\* 989:01e / DPB1\* 992:01e / DPB1\*  
997:01e / DPB1\* 1001:01e / DPB1\*  
1002:01e / DPB1\* 1003:01e / DPB1\*  
1004:01e / DPB1\* 1010:01e / DPB1\*  
1011:01e / DPB1\* 1023:01e / DPB1\*  
1033:01e / DPB1\* 1074:01e / DPB1\*  
1086:01e / DPB1\* 1091:01e / DPB1\*  
1100:01e / DPB1\* 1129:01e / DPB1\*  
1132:01e / DPB1\* 1146:01e / DPB1\*  
1148:01Qe / DPB1\* 1152:01e / DPB1\*  
1155:01e / DPB1\* 1161:01e / DPB1\*  
1164:01e

DPB1\* 04:01:01:24Ne / DPB1\* 99:01e /  
DPB1\* 120:01Ne / DPB1\* 121:01e / DPB1\*  
128:01e / DPB1\* 134:01e / DPB1\* 149:01e /  
DPB1\* 169:01e / DPB1\* 174:01e / DPB1\*  
175:01e / DPB1\* 180:01e / DPB1\* 181:01e /  
DPB1\* 192:01e / DPB1\* 193:01e / DPB1\*  
194:01e / DPB1\* 195:01e / DPB1\* 212:01e /  
DPB1\* 224:01e / DPB1\* 225:01e / DPB1\*  
228:01e / DPB1\* 231:01e / DPB1\* 232:01e /  
DPB1\* 240:01e / DPB1\* 253:01e / DPB1\*  
255:01e / DPB1\* 262:01e / DPB1\* 272:01e /  
DPB1\* 275:01e / DPB1\* 276:01e / DPB1\*  
281:01e / DPB1\* 282:01e / DPB1\* 283:01e /  
DPB1\* 298:01e / DPB1\* 320:01e / DPB1\*  
323:01e / DPB1\* 335:01e / DPB1\* 336:01e /  
DPB1\* 341:01e / DPB1\* 356:01e / DPB1\*  
360:01e / DPB1\* 372:01e / DPB1\* 376:01e /  
DPB1\* 378:01e / DPB1\* 396:01e / DPB1\*  
397:01e / DPB1\* 418:01e / DPB1\* 425:01e /  
DPB1\* 426:01e / DPB1\* 428:01e / DPB1\*  
434:01e / DPB1\* 453:01e / DPB1\* 455:01Ne /  
DPB1\* 465:01e / DPB1\* 468:01e / DPB1\*  
475:01e / DPB1\* 476:01e / DPB1\* 479:01e /  
DPB1\* 485:01e / DPB1\* 486:01e / DPB1\*  
487:01e / DPB1\* 497:01e / DPB1\* 500:01e /  
DPB1\* 520:01e / DPB1\* 521:01e / DPB1\*  
522:01e / DPB1\* 524:01e / DPB1\* 529:01e /  
DPB1\* 553:01e / DPB1\* 554:01e / DPB1\*  
556:01e / DPB1\* 559:01e / DPB1\* 569:01e /  
DPB1\* 575:01e / DPB1\* 578:01e / DPB1\*  
583:01e / DPB1\* 591:01e / DPB1\* 593:01e /  
DPB1\* 607:01e / DPB1\* 614:01e / DPB1\*  
625:01e / DPB1\* 643:01e / DPB1\* 658:01e /  
DPB1\* 666:01e / DPB1\* 682:01e / DPB1\*  
683:01e / DPB1\* 694:01e / DPB1\* 722:01e /  
DPB1\* 739:01e / DPB1\* 742:01e / DPB1\*  
750:01e / DPB1\* 754:01Ne / DPB1\*  
756:01Ne / DPB1\* 758:01e / DPB1\* 761:01e /  
DPB1\* 769:01e / DPB1\* 772:01e / DPB1\*  
773:01e / DPB1\* 788:01e / DPB1\* 795:01e /  
DPB1\* 803:01e / DPB1\* 808:01e / DPB1\*  
811:01e / DPB1\* 812:01e / DPB1\* 814:01e /

-

DPB1\* 837:01e / DPB1\* 842:01e / DPB1\* 852:01e / DPB1\* 878:01Ne / DPB1\* 895:01e / DPB1\* 915:01e / DPB1\* 957:01e / DPB1\* 966:01e / DPB1\* 974:01Ne / DPB1\* 993:01e / DPB1\* 1040:01e / DPB1\* 1042:01e / DPB1\* 1048:01e / DPB1\* 1060:01e / DPB1\* 1062:01e / DPB1\* 1064:01e / DPB1\* 1066:01e / DPB1\* 1108:01e / DPB1\* 1112:01Ne / DPB1\* 1113:01e / DPB1\* 1121:01Ne / DPB1\* 1139:01e / DPB1\* 1167:01e

EDP921

DPB1\* 921:01e

-

LFQG

GEFA

AAE

ILEEK

M

GGPM

1 rare

*One side of this epitope requires a RARE allele, review results to confirm assignment.*

OR

| EPITYPE                       | ALLELES                                                                                                                                                                                                                                                                                                                                                                                                                                                                                                                                                                                                                                                                                                                                                                                                                                                                                                                                                                                                                                                                                                                                                                                                                                                                                                                                                                                                                                                                                                                                                                                                                                                                                                                                                                                             | P GROUP                                 | HVR-A | HVR-B | HVR-C | HVR-D | HVR-E | HVR-F |
|-------------------------------|-----------------------------------------------------------------------------------------------------------------------------------------------------------------------------------------------------------------------------------------------------------------------------------------------------------------------------------------------------------------------------------------------------------------------------------------------------------------------------------------------------------------------------------------------------------------------------------------------------------------------------------------------------------------------------------------------------------------------------------------------------------------------------------------------------------------------------------------------------------------------------------------------------------------------------------------------------------------------------------------------------------------------------------------------------------------------------------------------------------------------------------------------------------------------------------------------------------------------------------------------------------------------------------------------------------------------------------------------------------------------------------------------------------------------------------------------------------------------------------------------------------------------------------------------------------------------------------------------------------------------------------------------------------------------------------------------------------------------------------------------------------------------------------------------------|-----------------------------------------|-------|-------|-------|-------|-------|-------|
| EDP04<br>1 common<br>291 rare | DPB1* 04:01:01:01, 04:01:01:02e, 04:01:01:03e, 04:01:01:04e, 04:01:01:05e, 04:01:01:06e, 04:01:01:07e, 04:01:01:08e, 04:01:01:09e, 04:01:01:10e, 04:01:01:11e, 04:01:01:12e, 04:01:01:13e, 04:01:01:14e, 04:01:01:15e, 04:01:01:16e, 04:01:01:17e, 04:01:01:18e, 04:01:01:19e, 04:01:01:20e, 04:01:01:21e, 04:01:01:22e, 04:01:01:23e, 04:01:01:25e, 04:01:01:26e, 04:01:01:27e, 04:01:01:28e, 04:01:01:29e, 04:01:01:30e, 04:01:01:31e, 04:01:01:32e, 04:01:01:33e, 04:01:01:34e, 04:01:01:35e, 04:01:01:36e, 04:01:01:37e, 04:01:01:38e, 04:01:01:39e, 04:01:01:40e, 04:01:01:41e, 04:01:01:42e, 04:01:01:43e, 04:01:01:44e, 04:01:01:45e, 04:01:01:46e, 04:01:01:47e, 04:01:01:48e, 04:01:01:49e, 04:01:01:50e, 04:01:01:51e, 04:01:01:52e, 04:01:01:53e, 04:01:02e, 04:01:03e, 04:01:04:01e, 04:01:04:02e, 04:01:05e, 04:01:06e, 04:01:07e, 04:01:08e, 04:01:09e, 04:01:10e, 04:01:11e, 04:01:12e, 04:01:13e, 04:01:14e, 04:01:15e, 04:01:16e, 04:01:17e, 04:01:18e, 04:01:19e, 04:01:20e, 04:01:21e, 04:01:22e, 04:01:23e, 04:01:24e, 04:01:25e, 04:01:26e, 04:01:27e, 04:01:28e, 04:01:29e, 04:01:30e, 04:01:31e, 04:01:32e, 04:01:33e, 04:01:34e, 04:01:35e, 04:01:36e, 04:01:37:01e, 04:01:37:02e, 04:01:38e, 04:01:39:01e, 04:01:39:02e, 04:01:40e, 04:01:41e, 04:01:42e, 04:01:43e, 04:01:44e, 04:01:45e, 04:01:46e, 04:01:47e, 04:01:48e, 04:01:49e, 04:01:50e / DPB1* 213:01:01e, 213:01:02e / DPB1* 334:01:01e, 334:01:02e / DPB1* 350:01e / DPB1* 415:01e / DPB1* 459:01e / DPB1* 464:01e / DPB1* 523:01:01e, 523:01:02e / DPB1* 534:01e / DPB1* 615:01e / DPB1* 618:01e / DPB1* 670:01e / DPB1* 677:01e / DPB1* 699:01e / DPB1* 755:01e / DPB1* 757:01e / DPB1* 765:01e / DPB1* 767:01e / DPB1* 784:01e / DPB1* 804:01e / DPB1* 806:01:01:01e, 806:01:01:02e / DPB1* 813:01e / DPB1* | 04:01P<br>213:01P<br>334:01P<br>523:01P | LFQG  | EEFA  | AAE   | ILEEK | M     | GGPM  |

820:01e / DPB1\* 824:01:01e, 824:01:02e /  
DPB1\* 826:01e / DPB1\* 850:01e / DPB1\*  
859:01e / DPB1\* 880:01e / DPB1\* 882:01e /  
DPB1\* 926:01e / DPB1\* 932:01e / DPB1\*  
939:01e / DPB1\* 978:01e / DPB1\* 988:01e /  
DPB1\* 989:01e / DPB1\* 992:01e / DPB1\*  
997:01e / DPB1\* 1001:01e / DPB1\*  
1002:01e / DPB1\* 1003:01e / DPB1\*  
1004:01e / DPB1\* 1010:01e / DPB1\*  
1011:01e / DPB1\* 1023:01e / DPB1\*  
1033:01e / DPB1\* 1074:01e / DPB1\*  
1086:01e / DPB1\* 1091:01e / DPB1\*  
1100:01e / DPB1\* 1129:01e / DPB1\*  
1132:01e / DPB1\* 1146:01e / DPB1\*  
1148:01Qe / DPB1\* 1152:01e / DPB1\*  
1155:01e / DPB1\* 1161:01e / DPB1\*  
1164:01e

DPB1\* 04:01:01:24Ne / DPB1\* 99:01e /  
DPB1\* 120:01Ne / DPB1\* 121:01e / DPB1\*  
128:01e / DPB1\* 134:01e / DPB1\* 149:01e /  
DPB1\* 169:01e / DPB1\* 174:01e / DPB1\*  
175:01e / DPB1\* 180:01e / DPB1\* 181:01e /  
DPB1\* 192:01e / DPB1\* 193:01e / DPB1\*  
194:01e / DPB1\* 195:01e / DPB1\* 212:01e /  
DPB1\* 224:01e / DPB1\* 225:01e / DPB1\*  
228:01e / DPB1\* 231:01e / DPB1\* 232:01e /  
DPB1\* 240:01e / DPB1\* 253:01e / DPB1\*  
255:01e / DPB1\* 262:01e / DPB1\* 272:01e /  
DPB1\* 275:01e / DPB1\* 276:01e / DPB1\*  
281:01e / DPB1\* 282:01e / DPB1\* 283:01e /  
DPB1\* 298:01e / DPB1\* 320:01e / DPB1\*  
323:01e / DPB1\* 335:01e / DPB1\* 336:01e /  
DPB1\* 341:01e / DPB1\* 356:01e / DPB1\*  
360:01e / DPB1\* 372:01e / DPB1\* 376:01e /  
DPB1\* 378:01e / DPB1\* 396:01e / DPB1\*  
397:01e / DPB1\* 418:01e / DPB1\* 425:01e /  
DPB1\* 426:01e / DPB1\* 428:01e / DPB1\*  
434:01e / DPB1\* 453:01e / DPB1\* 455:01Ne /  
DPB1\* 465:01e / DPB1\* 468:01e / DPB1\*  
475:01e / DPB1\* 476:01e / DPB1\* 479:01e /  
DPB1\* 485:01e / DPB1\* 486:01e / DPB1\*  
487:01e / DPB1\* 497:01e / DPB1\* 500:01e /  
DPB1\* 520:01e / DPB1\* 521:01e / DPB1\*  
522:01e / DPB1\* 524:01e / DPB1\* 529:01e /  
DPB1\* 553:01e / DPB1\* 554:01e / DPB1\*  
556:01e / DPB1\* 559:01e / DPB1\* 569:01e /  
DPB1\* 575:01e / DPB1\* 578:01e / DPB1\*  
583:01e / DPB1\* 591:01e / DPB1\* 593:01e /  
DPB1\* 607:01e / DPB1\* 614:01e / DPB1\*  
625:01e / DPB1\* 643:01e / DPB1\* 658:01e /  
DPB1\* 666:01e / DPB1\* 682:01e / DPB1\*  
683:01e / DPB1\* 694:01e / DPB1\* 722:01e /  
DPB1\* 739:01e / DPB1\* 742:01e / DPB1\*  
750:01e / DPB1\* 754:01Ne / DPB1\*  
756:01Ne / DPB1\* 758:01e / DPB1\* 761:01e /  
DPB1\* 769:01e / DPB1\* 772:01e / DPB1\*  
773:01e / DPB1\* 788:01e / DPB1\* 795:01e /  
DPB1\* 803:01e / DPB1\* 808:01e / DPB1\*  
811:01e / DPB1\* 812:01e / DPB1\* 814:01e /  
DPB1\* 837:01e / DPB1\* 842:01e / DPB1\*  
852:01e / DPB1\* 878:01Ne / DPB1\* 895:01e /  
DPB1\* 915:01e / DPB1\* 957:01e / DPB1\*  
966:01e / DPB1\* 974:01Ne / DPB1\* 993:01e /  
DPB1\* 1040:01e / DPB1\* 1042:01e / DPB1\*  
1048:01e / DPB1\* 1060:01e / DPB1\*

-

|                                                                                               |                                                                                                                                                                |   |      |      |     |       |   |      |  |
|-----------------------------------------------------------------------------------------------|----------------------------------------------------------------------------------------------------------------------------------------------------------------|---|------|------|-----|-------|---|------|--|
|                                                                                               | 1062:01e / DPB1* 1064:01e / DPB1*<br>1066:01e / DPB1* 1108:01e / DPB1*<br>1112:01Ne / DPB1* 1113:01e / DPB1*<br>1121:01Ne / DPB1* 1139:01e / DPB1*<br>1167:01e |   |      |      |     |       |   |      |  |
| <b>EDP871</b>                                                                                 | DPB1* 871:01Ne                                                                                                                                                 | - | LFQG | EEFA | AAE | HPGGE | D | GRAH |  |
| 1 rare                                                                                        |                                                                                                                                                                |   |      |      |     |       |   |      |  |
| <i>One side of this epitope requires a RARE allele, review results to confirm assignment.</i> |                                                                                                                                                                |   |      |      |     |       |   |      |  |

OR

| EPITYPE                                  | ALLELES                                                                                                                                                                                                                                                                                                                                                                                                                                                                                                                                                                                                                                                                                                                                                                                                                                                                                                                                                                                                                                                                                                                                                                                                                                                                                                                                                                                                                                                                                                                                                                                                                                                                                                                                                                                                                                                                                                                                                                                                                                                                                                                                                                                                 | P GROUP                                 | HVR-A | HVR-B | HVR-C | HVR-D | HVR-E | HVR-F |
|------------------------------------------|---------------------------------------------------------------------------------------------------------------------------------------------------------------------------------------------------------------------------------------------------------------------------------------------------------------------------------------------------------------------------------------------------------------------------------------------------------------------------------------------------------------------------------------------------------------------------------------------------------------------------------------------------------------------------------------------------------------------------------------------------------------------------------------------------------------------------------------------------------------------------------------------------------------------------------------------------------------------------------------------------------------------------------------------------------------------------------------------------------------------------------------------------------------------------------------------------------------------------------------------------------------------------------------------------------------------------------------------------------------------------------------------------------------------------------------------------------------------------------------------------------------------------------------------------------------------------------------------------------------------------------------------------------------------------------------------------------------------------------------------------------------------------------------------------------------------------------------------------------------------------------------------------------------------------------------------------------------------------------------------------------------------------------------------------------------------------------------------------------------------------------------------------------------------------------------------------------|-----------------------------------------|-------|-------|-------|-------|-------|-------|
| <b>EDP04</b><br><br>1 common<br>291 rare | <b>DPB1* 04:01:01:01</b> , 04:01:01:02e,<br>04:01:01:03e, 04:01:01:04e, 04:01:01:05e,<br>04:01:01:06e, 04:01:01:07e, 04:01:01:08e,<br>04:01:01:09e, 04:01:01:10e, 04:01:01:11e,<br>04:01:01:12e, 04:01:01:13e, 04:01:01:14e,<br>04:01:01:15e, 04:01:01:16e, 04:01:01:17e,<br>04:01:01:18e, 04:01:01:19e, 04:01:01:20e,<br>04:01:01:21e, 04:01:01:22e, 04:01:01:23e,<br>04:01:01:25e, 04:01:01:26e, 04:01:01:27e,<br>04:01:01:28e, 04:01:01:29e, 04:01:01:30e,<br>04:01:01:31e, 04:01:01:32e, 04:01:01:33e,<br>04:01:01:34e, 04:01:01:35e, 04:01:01:36e,<br>04:01:01:37e, 04:01:01:38e, 04:01:01:39e,<br>04:01:01:40e, 04:01:01:41e, 04:01:01:42e,<br>04:01:01:43e, 04:01:01:44e, 04:01:01:45e,<br>04:01:01:46e, 04:01:01:47e, 04:01:01:48e,<br>04:01:01:49e, 04:01:01:50e, 04:01:01:51e,<br>04:01:01:52e, 04:01:01:53e, 04:01:02e,<br>04:01:03e, 04:01:04:01e, 04:01:04:02e,<br>04:01:05e, 04:01:06e, 04:01:07e, 04:01:08e,<br>04:01:09e, 04:01:10e, 04:01:11e, 04:01:12e,<br>04:01:13e, 04:01:14e, 04:01:15e, 04:01:16e,<br>04:01:17e, 04:01:18e, 04:01:19e, 04:01:20e,<br>04:01:21e, 04:01:22e, 04:01:23e, 04:01:24e,<br>04:01:25e, 04:01:26e, 04:01:27e, 04:01:28e,<br>04:01:29e, 04:01:30e, 04:01:31e, 04:01:32e,<br>04:01:33e, 04:01:34e, 04:01:35e, 04:01:36e,<br>04:01:37:01e, 04:01:37:02e, 04:01:38e,<br>04:01:39:01e, 04:01:39:02e, 04:01:40e,<br>04:01:41e, 04:01:42e, 04:01:43e, 04:01:44e,<br>04:01:45e, 04:01:46e, 04:01:47e, 04:01:48e,<br>04:01:49e, 04:01:50e / DPB1* 213:01:01e,<br>213:01:02e / DPB1* 334:01:01e, 334:01:02e /<br>DPB1* 350:01e / DPB1* 415:01e / DPB1*<br>459:01e / DPB1* 464:01e / DPB1*<br>523:01:01e, 523:01:02e / DPB1* 534:01e /<br>DPB1* 615:01e / DPB1* 618:01e / DPB1*<br>670:01e / DPB1* 677:01e / DPB1* 699:01e /<br>DPB1* 755:01e / DPB1* 757:01e / DPB1*<br>765:01e / DPB1* 767:01e / DPB1* 784:01e /<br>DPB1* 804:01e / DPB1* 806:01:01:01e,<br>806:01:01:02e / DPB1* 813:01e / DPB1*<br>820:01e / DPB1* 824:01:01e, 824:01:02e /<br>DPB1* 826:01e / DPB1* 850:01e / DPB1*<br>859:01e / DPB1* 880:01e / DPB1* 882:01e /<br>DPB1* 926:01e / DPB1* 932:01e / DPB1*<br>939:01e / DPB1* 978:01e / DPB1* 988:01e /<br>DPB1* 989:01e / DPB1* 992:01e / DPB1* | 04:01P<br>213:01P<br>334:01P<br>523:01P | LFQG  | EEFA  | AAE   | ILEEK | M     | GGPM  |

997:01e / DPB1\* 1001:01e / DPB1\*  
1002:01e / DPB1\* 1003:01e / DPB1\*  
1004:01e / DPB1\* 1010:01e / DPB1\*  
1011:01e / DPB1\* 1023:01e / DPB1\*  
1033:01e / DPB1\* 1074:01e / DPB1\*  
1086:01e / DPB1\* 1091:01e / DPB1\*  
1100:01e / DPB1\* 1129:01e / DPB1\*  
1132:01e / DPB1\* 1146:01e / DPB1\*  
1148:01Qe / DPB1\* 1152:01e / DPB1\*  
1155:01e / DPB1\* 1161:01e / DPB1\*  
1164:01e

DPB1\* 04:01:01:24Ne / DPB1\* 99:01e /  
DPB1\* 120:01Ne / DPB1\* 121:01e / DPB1\*  
128:01e / DPB1\* 134:01e / DPB1\* 149:01e /  
DPB1\* 169:01e / DPB1\* 174:01e / DPB1\*  
175:01e / DPB1\* 180:01e / DPB1\* 181:01e /  
DPB1\* 192:01e / DPB1\* 193:01e / DPB1\*  
194:01e / DPB1\* 195:01e / DPB1\* 212:01e /  
DPB1\* 224:01e / DPB1\* 225:01e / DPB1\*  
228:01e / DPB1\* 231:01e / DPB1\* 232:01e /  
DPB1\* 240:01e / DPB1\* 253:01e / DPB1\*  
255:01e / DPB1\* 262:01e / DPB1\* 272:01e /  
DPB1\* 275:01e / DPB1\* 276:01e / DPB1\*  
281:01e / DPB1\* 282:01e / DPB1\* 283:01e /  
DPB1\* 298:01e / DPB1\* 320:01e / DPB1\*  
323:01e / DPB1\* 335:01e / DPB1\* 336:01e /  
DPB1\* 341:01e / DPB1\* 356:01e / DPB1\*  
360:01e / DPB1\* 372:01e / DPB1\* 376:01e /  
DPB1\* 378:01e / DPB1\* 396:01e / DPB1\*  
397:01e / DPB1\* 418:01e / DPB1\* 425:01e /  
DPB1\* 426:01e / DPB1\* 428:01e / DPB1\*  
434:01e / DPB1\* 453:01e / DPB1\* 455:01Ne /  
DPB1\* 465:01e / DPB1\* 468:01e / DPB1\*  
475:01e / DPB1\* 476:01e / DPB1\* 479:01e /  
DPB1\* 485:01e / DPB1\* 486:01e / DPB1\*  
487:01e / DPB1\* 497:01e / DPB1\* 500:01e /  
DPB1\* 520:01e / DPB1\* 521:01e / DPB1\*  
522:01e / DPB1\* 524:01e / DPB1\* 529:01e /  
DPB1\* 553:01e / DPB1\* 554:01e / DPB1\*  
556:01e / DPB1\* 559:01e / DPB1\* 569:01e /  
DPB1\* 575:01e / DPB1\* 578:01e / DPB1\*  
583:01e / DPB1\* 591:01e / DPB1\* 593:01e /  
DPB1\* 607:01e / DPB1\* 614:01e / DPB1\*  
625:01e / DPB1\* 643:01e / DPB1\* 658:01e /  
DPB1\* 666:01e / DPB1\* 682:01e / DPB1\*  
683:01e / DPB1\* 694:01e / DPB1\* 722:01e /  
DPB1\* 739:01e / DPB1\* 742:01e / DPB1\*  
750:01e / DPB1\* 754:01Ne / DPB1\*  
756:01Ne / DPB1\* 758:01e / DPB1\* 761:01e /  
DPB1\* 769:01e / DPB1\* 772:01e / DPB1\*  
773:01e / DPB1\* 788:01e / DPB1\* 795:01e /  
DPB1\* 803:01e / DPB1\* 808:01e / DPB1\*  
811:01e / DPB1\* 812:01e / DPB1\* 814:01e /  
DPB1\* 837:01e / DPB1\* 842:01e / DPB1\*  
852:01e / DPB1\* 878:01Ne / DPB1\* 895:01e /  
DPB1\* 915:01e / DPB1\* 957:01e / DPB1\*  
966:01e / DPB1\* 974:01Ne / DPB1\* 993:01e /  
DPB1\* 1040:01e / DPB1\* 1042:01e / DPB1\*  
1048:01e / DPB1\* 1060:01e / DPB1\*  
1062:01e / DPB1\* 1064:01e / DPB1\*  
1066:01e / DPB1\* 1108:01e / DPB1\*  
1112:01Ne / DPB1\* 1113:01e / DPB1\*  
1121:01Ne / DPB1\* 1139:01e / DPB1\*  
1167:01e

-

|                                                                                               |               |   |      |      |     |              |   |      |
|-----------------------------------------------------------------------------------------------|---------------|---|------|------|-----|--------------|---|------|
| <b>EDP399</b>                                                                                 | DPB1* 399:01e | - | LFQG | EEFA | AAE | <b>IVEEK</b> | M | GGPM |
| 1 rare                                                                                        |               |   |      |      |     |              |   |      |
| <i>One side of this epitype requires a RARE allele, review results to confirm assignment.</i> |               |   |      |      |     |              |   |      |

OR

| EPITYPE                                  | ALLELES                                                                                                                                                                                                                                                                                                                                                                                                                                                                                                                                                                                                                                                                                                                                                                                                                                                                                                                                                                                                                                                                                                                                                                                                                                                                                                                                                                                                                                                                                                                                                                                                                                                                                                                                                                                                                                                                                                                                                                                                                                                                                                                                                                                                                                                                                                                                                                                                                              | P GROUP                                 | HVR-A | HVR-B | HVR-C | HVR-D | HVR-E | HVR-F |
|------------------------------------------|--------------------------------------------------------------------------------------------------------------------------------------------------------------------------------------------------------------------------------------------------------------------------------------------------------------------------------------------------------------------------------------------------------------------------------------------------------------------------------------------------------------------------------------------------------------------------------------------------------------------------------------------------------------------------------------------------------------------------------------------------------------------------------------------------------------------------------------------------------------------------------------------------------------------------------------------------------------------------------------------------------------------------------------------------------------------------------------------------------------------------------------------------------------------------------------------------------------------------------------------------------------------------------------------------------------------------------------------------------------------------------------------------------------------------------------------------------------------------------------------------------------------------------------------------------------------------------------------------------------------------------------------------------------------------------------------------------------------------------------------------------------------------------------------------------------------------------------------------------------------------------------------------------------------------------------------------------------------------------------------------------------------------------------------------------------------------------------------------------------------------------------------------------------------------------------------------------------------------------------------------------------------------------------------------------------------------------------------------------------------------------------------------------------------------------------|-----------------------------------------|-------|-------|-------|-------|-------|-------|
| <b>EDP04</b><br><br>1 common<br>291 rare | <b>DPB1* 04:01:01:01</b> , 04:01:01:02e,<br>04:01:01:03e, 04:01:01:04e, 04:01:01:05e,<br>04:01:01:06e, 04:01:01:07e, 04:01:01:08e,<br>04:01:01:09e, 04:01:01:10e, 04:01:01:11e,<br>04:01:01:12e, 04:01:01:13e, 04:01:01:14e,<br>04:01:01:15e, 04:01:01:16e, 04:01:01:17e,<br>04:01:01:18e, 04:01:01:19e, 04:01:01:20e,<br>04:01:01:21e, 04:01:01:22e, 04:01:01:23e,<br>04:01:01:25e, 04:01:01:26e, 04:01:01:27e,<br>04:01:01:28e, 04:01:01:29e, 04:01:01:30e,<br>04:01:01:31e, 04:01:01:32e, 04:01:01:33e,<br>04:01:01:34e, 04:01:01:35e, 04:01:01:36e,<br>04:01:01:37e, 04:01:01:38e, 04:01:01:39e,<br>04:01:01:40e, 04:01:01:41e, 04:01:01:42e,<br>04:01:01:43e, 04:01:01:44e, 04:01:01:45e,<br>04:01:01:46e, 04:01:01:47e, 04:01:01:48e,<br>04:01:01:49e, 04:01:01:50e, 04:01:01:51e,<br>04:01:01:52e, 04:01:01:53e, 04:01:02e,<br>04:01:03e, 04:01:04:01e, 04:01:04:02e,<br>04:01:05e, 04:01:06e, 04:01:07e, 04:01:08e,<br>04:01:09e, 04:01:10e, 04:01:11e, 04:01:12e,<br>04:01:13e, 04:01:14e, 04:01:15e, 04:01:16e,<br>04:01:17e, 04:01:18e, 04:01:19e, 04:01:20e,<br>04:01:21e, 04:01:22e, 04:01:23e, 04:01:24e,<br>04:01:25e, 04:01:26e, 04:01:27e, 04:01:28e,<br>04:01:29e, 04:01:30e, 04:01:31e, 04:01:32e,<br>04:01:33e, 04:01:34e, 04:01:35e, 04:01:36e,<br>04:01:37:01e, 04:01:37:02e, 04:01:38e,<br>04:01:39:01e, 04:01:39:02e, 04:01:40e,<br>04:01:41e, 04:01:42e, 04:01:43e, 04:01:44e,<br>04:01:45e, 04:01:46e, 04:01:47e, 04:01:48e,<br>04:01:49e, 04:01:50e / DPB1* 213:01:01e,<br>213:01:02e / DPB1* 334:01:01e, 334:01:02e /<br>DPB1* 350:01e / DPB1* 415:01e / DPB1*<br>459:01e / DPB1* 464:01e / DPB1*<br>523:01:01e, 523:01:02e / DPB1* 534:01e /<br>DPB1* 615:01e / DPB1* 618:01e / DPB1*<br>670:01e / DPB1* 677:01e / DPB1* 699:01e /<br>DPB1* 755:01e / DPB1* 757:01e / DPB1*<br>765:01e / DPB1* 767:01e / DPB1* 784:01e /<br>DPB1* 804:01e / DPB1* 806:01:01:01e,<br>806:01:01:02e / DPB1* 813:01e / DPB1*<br>820:01e / DPB1* 824:01:01e, 824:01:02e /<br>DPB1* 826:01e / DPB1* 850:01e / DPB1*<br>859:01e / DPB1* 880:01e / DPB1* 882:01e /<br>DPB1* 926:01e / DPB1* 932:01e / DPB1*<br>939:01e / DPB1* 978:01e / DPB1* 988:01e /<br>DPB1* 989:01e / DPB1* 992:01e / DPB1*<br>997:01e / DPB1* 1001:01e / DPB1*<br>1002:01e / DPB1* 1003:01e / DPB1*<br>1004:01e / DPB1* 1010:01e / DPB1*<br>1011:01e / DPB1* 1023:01e / DPB1*<br>1033:01e / DPB1* 1074:01e / DPB1*<br>1086:01e / DPB1* 1091:01e / DPB1* | 04:01P<br>213:01P<br>334:01P<br>523:01P | LFQG  | EEFA  | AAE   | ILEEK | M     | GGPM  |

1100:01e / DPB1\* 1129:01e / DPB1\*  
 1132:01e / DPB1\* 1146:01e / DPB1\*  
 1148:01Qe / DPB1\* 1152:01e / DPB1\*  
 1155:01e / DPB1\* 1161:01e / DPB1\*  
 1164:01e

DPB1\* 04:01:01:24Ne / DPB1\* 99:01e /  
 DPB1\* 120:01Ne / DPB1\* 121:01e / DPB1\*  
 128:01e / DPB1\* 134:01e / DPB1\* 149:01e /  
 DPB1\* 169:01e / DPB1\* 174:01e / DPB1\*  
 175:01e / DPB1\* 180:01e / DPB1\* 181:01e /  
 DPB1\* 192:01e / DPB1\* 193:01e / DPB1\*  
 194:01e / DPB1\* 195:01e / DPB1\* 212:01e /  
 DPB1\* 224:01e / DPB1\* 225:01e / DPB1\*  
 228:01e / DPB1\* 231:01e / DPB1\* 232:01e /  
 DPB1\* 240:01e / DPB1\* 253:01e / DPB1\*  
 255:01e / DPB1\* 262:01e / DPB1\* 272:01e /  
 DPB1\* 275:01e / DPB1\* 276:01e / DPB1\*  
 281:01e / DPB1\* 282:01e / DPB1\* 283:01e /  
 DPB1\* 298:01e / DPB1\* 320:01e / DPB1\*  
 323:01e / DPB1\* 335:01e / DPB1\* 336:01e /  
 DPB1\* 341:01e / DPB1\* 356:01e / DPB1\*  
 360:01e / DPB1\* 372:01e / DPB1\* 376:01e /  
 DPB1\* 378:01e / DPB1\* 396:01e / DPB1\*  
 397:01e / DPB1\* 418:01e / DPB1\* 425:01e /  
 DPB1\* 426:01e / DPB1\* 428:01e / DPB1\*  
 434:01e / DPB1\* 453:01e / DPB1\* 455:01Ne /  
 DPB1\* 465:01e / DPB1\* 468:01e / DPB1\*  
 475:01e / DPB1\* 476:01e / DPB1\* 479:01e /  
 DPB1\* 485:01e / DPB1\* 486:01e / DPB1\*  
 487:01e / DPB1\* 497:01e / DPB1\* 500:01e /  
 DPB1\* 520:01e / DPB1\* 521:01e / DPB1\*  
 522:01e / DPB1\* 524:01e / DPB1\* 529:01e /  
 DPB1\* 553:01e / DPB1\* 554:01e / DPB1\*  
 556:01e / DPB1\* 559:01e / DPB1\* 569:01e /  
 DPB1\* 575:01e / DPB1\* 578:01e / DPB1\*  
 583:01e / DPB1\* 591:01e / DPB1\* 593:01e /  
 DPB1\* 607:01e / DPB1\* 614:01e / DPB1\*  
 625:01e / DPB1\* 643:01e / DPB1\* 658:01e /  
 DPB1\* 666:01e / DPB1\* 682:01e / DPB1\*  
 683:01e / DPB1\* 694:01e / DPB1\* 722:01e /  
 DPB1\* 739:01e / DPB1\* 742:01e / DPB1\*  
 750:01e / DPB1\* 754:01Ne / DPB1\*  
 756:01Ne / DPB1\* 758:01e / DPB1\* 761:01e /  
 DPB1\* 769:01e / DPB1\* 772:01e / DPB1\*  
 773:01e / DPB1\* 788:01e / DPB1\* 795:01e /  
 DPB1\* 803:01e / DPB1\* 808:01e / DPB1\*  
 811:01e / DPB1\* 812:01e / DPB1\* 814:01e /  
 DPB1\* 837:01e / DPB1\* 842:01e / DPB1\*  
 852:01e / DPB1\* 878:01Ne / DPB1\* 895:01e /  
 DPB1\* 915:01e / DPB1\* 957:01e / DPB1\*  
 966:01e / DPB1\* 974:01Ne / DPB1\* 993:01e /  
 DPB1\* 1040:01e / DPB1\* 1042:01e / DPB1\*  
 1048:01e / DPB1\* 1060:01e / DPB1\*  
 1062:01e / DPB1\* 1064:01e / DPB1\*  
 1066:01e / DPB1\* 1108:01e / DPB1\*  
 1112:01Ne / DPB1\* 1113:01e / DPB1\*  
 1121:01Ne / DPB1\* 1139:01e / DPB1\*  
 1167:01e

-

**EDP319**

DPB1\* 319:01e

-

LFQG

EEFA

AAE

**IQEEK**

M

GGPM

1 rare

*One side of this epitope requires a RARE allele, review results to confirm assignment.*

OR

| EPITYPE                       | ALLELES                                                                                                                                                                                                                                                                                                                                                                                                                                                                                                                                                                                                                                                                                                                                                                                                                                                                                                                                                                                                                                                                                                                                                                                                                                                                                                                                                                                                                                                                                                                                                                                                                                                                                                                                                                                                                                                                                                                                                                                                                                                                                                                                                                                                                                                                                                                                                                                                                                                                                                                                                                                    | P GROUP                                 | HVR-A | HVR-B | HVR-C | HVR-D | HVR-E | HVR-F |
|-------------------------------|--------------------------------------------------------------------------------------------------------------------------------------------------------------------------------------------------------------------------------------------------------------------------------------------------------------------------------------------------------------------------------------------------------------------------------------------------------------------------------------------------------------------------------------------------------------------------------------------------------------------------------------------------------------------------------------------------------------------------------------------------------------------------------------------------------------------------------------------------------------------------------------------------------------------------------------------------------------------------------------------------------------------------------------------------------------------------------------------------------------------------------------------------------------------------------------------------------------------------------------------------------------------------------------------------------------------------------------------------------------------------------------------------------------------------------------------------------------------------------------------------------------------------------------------------------------------------------------------------------------------------------------------------------------------------------------------------------------------------------------------------------------------------------------------------------------------------------------------------------------------------------------------------------------------------------------------------------------------------------------------------------------------------------------------------------------------------------------------------------------------------------------------------------------------------------------------------------------------------------------------------------------------------------------------------------------------------------------------------------------------------------------------------------------------------------------------------------------------------------------------------------------------------------------------------------------------------------------------|-----------------------------------------|-------|-------|-------|-------|-------|-------|
| EDP04<br>1 common<br>289 rare | <b>DPB1* 04:01:01:01</b> , 04:01:01:02e,<br>04:01:01:03e, 04:01:01:04e, 04:01:01:05e,<br>04:01:01:06e, 04:01:01:07e, 04:01:01:08e,<br>04:01:01:09e, 04:01:01:10e, 04:01:01:11e,<br>04:01:01:12e, 04:01:01:13e, 04:01:01:14e,<br>04:01:01:15e, 04:01:01:16e, 04:01:01:17e,<br>04:01:01:18e, 04:01:01:19e, 04:01:01:20e,<br>04:01:01:21e, 04:01:01:22e, 04:01:01:23e,<br>04:01:01:25e, 04:01:01:26e, 04:01:01:27e,<br>04:01:01:28e, 04:01:01:29e, 04:01:01:30e,<br>04:01:01:31e, 04:01:01:32e, 04:01:01:33e,<br>04:01:01:34e, 04:01:01:35e, 04:01:01:36e,<br>04:01:01:37e, 04:01:01:38e, 04:01:01:39e,<br>04:01:01:40e, 04:01:01:41e, 04:01:01:42e,<br>04:01:01:43e, 04:01:01:44e, 04:01:01:45e,<br>04:01:01:46e, 04:01:01:47e, 04:01:01:48e,<br>04:01:01:49e, 04:01:01:50e, 04:01:01:51e,<br>04:01:01:52e, 04:01:01:53e, 04:01:02e,<br>04:01:03e, 04:01:04:01e, 04:01:04:02e,<br>04:01:05e, 04:01:06e, 04:01:07e, 04:01:08e,<br>04:01:09e, 04:01:10e, 04:01:11e, 04:01:12e,<br>04:01:14e, 04:01:15e, 04:01:16e, 04:01:17e,<br>04:01:18e, 04:01:19e, 04:01:20e, 04:01:21e,<br>04:01:22e, 04:01:23e, 04:01:24e, 04:01:25e,<br>04:01:26e, 04:01:27e, 04:01:28e, 04:01:29e,<br>04:01:30e, 04:01:31e, 04:01:32e, 04:01:33e,<br>04:01:34e, 04:01:35e, 04:01:36e,<br>04:01:37:01e, 04:01:37:02e, 04:01:38e,<br>04:01:39:01e, 04:01:39:02e, 04:01:40e,<br>04:01:41e, 04:01:42e, 04:01:43e, 04:01:44e,<br>04:01:45e, 04:01:46e, 04:01:47e, 04:01:48e,<br>04:01:49e, 04:01:50e / DPB1* 213:01:01e,<br>213:01:02e / DPB1* 334:01:01e, 334:01:02e /<br>DPB1* 350:01e / DPB1* 415:01e / DPB1*<br>459:01e / DPB1* 464:01e / DPB1*<br>523:01:01e, 523:01:02e / DPB1* 534:01e /<br>DPB1* 615:01e / DPB1* 618:01e / DPB1*<br>670:01e / DPB1* 677:01e / DPB1* 699:01e /<br>DPB1* 755:01e / DPB1* 757:01e / DPB1*<br>765:01e / DPB1* 767:01e / DPB1* 784:01e /<br>DPB1* 804:01e / DPB1* 806:01:01:01e,<br>806:01:01:02e / DPB1* 813:01e / DPB1*<br>820:01e / DPB1* 824:01:01e, 824:01:02e /<br>DPB1* 826:01e / DPB1* 850:01e / DPB1*<br>859:01e / DPB1* 880:01e / DPB1* 882:01e /<br>DPB1* 926:01e / DPB1* 932:01e / DPB1*<br>939:01e / DPB1* 978:01e / DPB1* 988:01e /<br>DPB1* 989:01e / DPB1* 992:01e / DPB1*<br>997:01e / DPB1* 1001:01e / DPB1*<br>1002:01e / DPB1* 1003:01e / DPB1*<br>1004:01e / DPB1* 1010:01e / DPB1*<br>1011:01e / DPB1* 1023:01e / DPB1*<br>1033:01e / DPB1* 1074:01e / DPB1*<br>1086:01e / DPB1* 1091:01e / DPB1*<br>1100:01e / DPB1* 1129:01e / DPB1*<br>1132:01e / DPB1* 1146:01e / DPB1*<br>1148:01Qe / DPB1* 1152:01e / DPB1*<br>1155:01e / DPB1* 1161:01e / DPB1*<br>1164:01e | 04:01P<br>213:01P<br>334:01P<br>523:01P | LFQG  | EEFA  | AAE   | ILEEK | M     | GGPM  |



DPB1\* 04:01:01:24Ne / DPB1\* 99:01e /  
 DPB1\* 120:01Ne / DPB1\* 121:01e / DPB1\*  
 128:01e / DPB1\* 134:01e / DPB1\* 149:01e /  
 DPB1\* 169:01e / DPB1\* 174:01e / DPB1\*  
 175:01e / DPB1\* 180:01e / DPB1\* 181:01e /  
 DPB1\* 192:01e / DPB1\* 194:01e / DPB1\*  
 195:01e / DPB1\* 212:01e / DPB1\* 224:01e /  
 DPB1\* 225:01e / DPB1\* 228:01e / DPB1\*  
 231:01e / DPB1\* 232:01e / DPB1\* 240:01e /  
 DPB1\* 253:01e / DPB1\* 255:01e / DPB1\*  
 262:01e / DPB1\* 272:01e / DPB1\* 275:01e /  
 DPB1\* 276:01e / DPB1\* 281:01e / DPB1\*  
 282:01e / DPB1\* 283:01e / DPB1\* 298:01e /  
 DPB1\* 320:01e / DPB1\* 323:01e / DPB1\*  
 335:01e / DPB1\* 336:01e / DPB1\* 341:01e /  
 DPB1\* 356:01e / DPB1\* 360:01e / DPB1\*  
 372:01e / DPB1\* 376:01e / DPB1\* 378:01e /  
 DPB1\* 396:01e / DPB1\* 397:01e / DPB1\*  
 418:01e / DPB1\* 425:01e / DPB1\* 426:01e /  
 DPB1\* 428:01e / DPB1\* 434:01e / DPB1\*  
 453:01e / DPB1\* 455:01Ne / DPB1\* 465:01e /  
 DPB1\* 468:01e / DPB1\* 475:01e / DPB1\*  
 476:01e / DPB1\* 479:01e / DPB1\* 485:01e /  
 DPB1\* 486:01e / DPB1\* 487:01e / DPB1\*  
 497:01e / DPB1\* 500:01e / DPB1\* 520:01e /  
 DPB1\* 521:01e / DPB1\* 522:01e / DPB1\*  
 524:01e / DPB1\* 529:01e / DPB1\* 553:01e /  
 DPB1\* 554:01e / DPB1\* 556:01e / DPB1\*  
 559:01e / DPB1\* 569:01e / DPB1\* 575:01e /  
 DPB1\* 578:01e / DPB1\* 583:01e / DPB1\*  
 591:01e / DPB1\* 593:01e / DPB1\* 607:01e /  
 DPB1\* 614:01e / DPB1\* 625:01e / DPB1\*  
 643:01e / DPB1\* 658:01e / DPB1\* 666:01e /  
 DPB1\* 682:01e / DPB1\* 683:01e / DPB1\*  
 694:01e / DPB1\* 722:01e / DPB1\* 739:01e /  
 DPB1\* 742:01e / DPB1\* 750:01e / DPB1\*  
 754:01Ne / DPB1\* 756:01Ne / DPB1\*  
 758:01e / DPB1\* 761:01e / DPB1\* 769:01e /  
 DPB1\* 772:01e / DPB1\* 773:01e / DPB1\*  
 788:01e / DPB1\* 795:01e / DPB1\* 803:01e /  
 DPB1\* 808:01e / DPB1\* 811:01e / DPB1\*  
 812:01e / DPB1\* 814:01e / DPB1\* 837:01e /  
 DPB1\* 842:01e / DPB1\* 852:01e / DPB1\*  
 878:01Ne / DPB1\* 895:01e / DPB1\* 915:01e /  
 DPB1\* 957:01e / DPB1\* 966:01e / DPB1\*  
 974:01Ne / DPB1\* 993:01e / DPB1\*  
 1040:01e / DPB1\* 1042:01e / DPB1\*  
 1048:01e / DPB1\* 1060:01e / DPB1\*  
 1062:01e / DPB1\* 1064:01e / DPB1\*  
 1066:01e / DPB1\* 1108:01e / DPB1\*  
 1112:01Ne / DPB1\* 1113:01e / DPB1\*  
 1121:01Ne / DPB1\* 1139:01e / DPB1\*  
 1167:01e

-

**EDP179**

DPB1\* 179:01e

-

LFQG

EEFA

AAE

**LLEER**

M

GGPM

1 rare

*One side of this epitope requires a RARE allele, review results to confirm assignment.*

OR

| EPITYPE | ALLELES | P GROUP | HVR-A | HVR-B | HVR-C | HVR-D | HVR-E | HVR-F |
|---------|---------|---------|-------|-------|-------|-------|-------|-------|
|---------|---------|---------|-------|-------|-------|-------|-------|-------|

|                                                  |                                                                                                                                                                                                                                                                                                                                                                                                                                                                                                                                                                                                                                                                                                                                                                                                                                                                                                                                                                                                                                                                                                                                                                                                                                                                                                                                                                                                                                                                                                                                                                                                                                                                                                                                                                                                                                                                                                                                                                                                                                                                                                                                                                                                                                                                                                                                                                                                                                                                                                                                                                                                                                                                                                                                                                                                                                                                                                                                   |                                                            |             |             |            |              |          |             |
|--------------------------------------------------|-----------------------------------------------------------------------------------------------------------------------------------------------------------------------------------------------------------------------------------------------------------------------------------------------------------------------------------------------------------------------------------------------------------------------------------------------------------------------------------------------------------------------------------------------------------------------------------------------------------------------------------------------------------------------------------------------------------------------------------------------------------------------------------------------------------------------------------------------------------------------------------------------------------------------------------------------------------------------------------------------------------------------------------------------------------------------------------------------------------------------------------------------------------------------------------------------------------------------------------------------------------------------------------------------------------------------------------------------------------------------------------------------------------------------------------------------------------------------------------------------------------------------------------------------------------------------------------------------------------------------------------------------------------------------------------------------------------------------------------------------------------------------------------------------------------------------------------------------------------------------------------------------------------------------------------------------------------------------------------------------------------------------------------------------------------------------------------------------------------------------------------------------------------------------------------------------------------------------------------------------------------------------------------------------------------------------------------------------------------------------------------------------------------------------------------------------------------------------------------------------------------------------------------------------------------------------------------------------------------------------------------------------------------------------------------------------------------------------------------------------------------------------------------------------------------------------------------------------------------------------------------------------------------------------------------|------------------------------------------------------------|-------------|-------------|------------|--------------|----------|-------------|
| <p><b>EDP04</b></p> <p>1 common<br/>289 rare</p> | <p><b>DPB1* 04:01:01:01</b>, 04:01:01:02e,<br/>04:01:01:03e, 04:01:01:04e, 04:01:01:05e,<br/>04:01:01:06e, 04:01:01:07e, 04:01:01:08e,<br/>04:01:01:09e, 04:01:01:10e, 04:01:01:11e,<br/>04:01:01:12e, 04:01:01:13e, 04:01:01:14e,<br/>04:01:01:15e, 04:01:01:16e, 04:01:01:17e,<br/>04:01:01:18e, 04:01:01:19e, 04:01:01:20e,<br/>04:01:01:21e, 04:01:01:22e, 04:01:01:23e,<br/>04:01:01:25e, 04:01:01:26e, 04:01:01:27e,<br/>04:01:01:28e, 04:01:01:29e, 04:01:01:30e,<br/>04:01:01:31e, 04:01:01:32e, 04:01:01:33e,<br/>04:01:01:34e, 04:01:01:35e, 04:01:01:36e,<br/>04:01:01:37e, 04:01:01:38e, 04:01:01:39e,<br/>04:01:01:40e, 04:01:01:41e, 04:01:01:42e,<br/>04:01:01:43e, 04:01:01:44e, 04:01:01:45e,<br/>04:01:01:46e, 04:01:01:47e, 04:01:01:48e,<br/>04:01:01:49e, 04:01:01:50e, 04:01:01:51e,<br/>04:01:01:52e, 04:01:01:53e, 04:01:02e,<br/>04:01:03e, 04:01:04:01e, 04:01:04:02e,<br/>04:01:05e, 04:01:06e, 04:01:07e, 04:01:08e,<br/>04:01:09e, 04:01:10e, 04:01:11e, 04:01:12e,<br/>04:01:14e, 04:01:15e, 04:01:16e, 04:01:17e,<br/>04:01:18e, 04:01:19e, 04:01:20e, 04:01:21e,<br/>04:01:22e, 04:01:23e, 04:01:24e, 04:01:25e,<br/>04:01:26e, 04:01:27e, 04:01:28e, 04:01:29e,<br/>04:01:30e, 04:01:31e, 04:01:32e, 04:01:33e,<br/>04:01:34e, 04:01:35e, 04:01:36e,<br/>04:01:37:01e, 04:01:37:02e, 04:01:38e,<br/>04:01:39:01e, 04:01:39:02e, 04:01:40e,<br/>04:01:41e, 04:01:42e, 04:01:43e, 04:01:44e,<br/>04:01:45e, 04:01:46e, 04:01:47e, 04:01:48e,<br/>04:01:49e, 04:01:50e / DPB1* 213:01:01e,<br/>213:01:02e / DPB1* 334:01:01e, 334:01:02e /<br/>DPB1* 350:01e / DPB1* 415:01e / DPB1*<br/>459:01e / DPB1* 464:01e / DPB1*<br/>523:01:01e, 523:01:02e / DPB1* 534:01e /<br/>DPB1* 615:01e / DPB1* 618:01e / DPB1*<br/>670:01e / DPB1* 677:01e / DPB1* 699:01e /<br/>DPB1* 755:01e / DPB1* 757:01e / DPB1*<br/>765:01e / DPB1* 767:01e / DPB1* 784:01e /<br/>DPB1* 804:01e / DPB1* 806:01:01:01e,<br/>806:01:01:02e / DPB1* 813:01e / DPB1*<br/>820:01e / DPB1* 824:01:01e, 824:01:02e /<br/>DPB1* 826:01e / DPB1* 850:01e / DPB1*<br/>859:01e / DPB1* 880:01e / DPB1* 882:01e /<br/>DPB1* 926:01e / DPB1* 932:01e / DPB1*<br/>939:01e / DPB1* 978:01e / DPB1* 988:01e /<br/>DPB1* 989:01e / DPB1* 992:01e / DPB1*<br/>997:01e / DPB1* 1001:01e / DPB1*<br/>1002:01e / DPB1* 1003:01e / DPB1*<br/>1004:01e / DPB1* 1010:01e / DPB1*<br/>1011:01e / DPB1* 1023:01e / DPB1*<br/>1033:01e / DPB1* 1074:01e / DPB1*<br/>1086:01e / DPB1* 1091:01e / DPB1*<br/>1100:01e / DPB1* 1129:01e / DPB1*<br/>1132:01e / DPB1* 1146:01e / DPB1*<br/>1148:01Qe / DPB1* 1152:01e / DPB1*<br/>1155:01e / DPB1* 1161:01e / DPB1*<br/>1164:01e</p> <p>DPB1* 04:01:01:24Ne / DPB1* 99:01e /<br/>DPB1* 120:01Ne / DPB1* 121:01e / DPB1*<br/>128:01e / DPB1* 134:01e / DPB1* 149:01e /<br/>DPB1* 169:01e / DPB1* 174:01e / DPB1*<br/>175:01e / DPB1* 180:01e / DPB1* 181:01e /<br/>DPB1* 192:01e / DPB1* 194:01e / DPB1*</p> | <p>04:01P<br/>213:01P<br/>334:01P<br/>523:01P</p> <p>-</p> | <p>LFQG</p> | <p>EEFA</p> | <p>AAE</p> | <p>ILEEK</p> | <p>M</p> | <p>GGPM</p> |
|--------------------------------------------------|-----------------------------------------------------------------------------------------------------------------------------------------------------------------------------------------------------------------------------------------------------------------------------------------------------------------------------------------------------------------------------------------------------------------------------------------------------------------------------------------------------------------------------------------------------------------------------------------------------------------------------------------------------------------------------------------------------------------------------------------------------------------------------------------------------------------------------------------------------------------------------------------------------------------------------------------------------------------------------------------------------------------------------------------------------------------------------------------------------------------------------------------------------------------------------------------------------------------------------------------------------------------------------------------------------------------------------------------------------------------------------------------------------------------------------------------------------------------------------------------------------------------------------------------------------------------------------------------------------------------------------------------------------------------------------------------------------------------------------------------------------------------------------------------------------------------------------------------------------------------------------------------------------------------------------------------------------------------------------------------------------------------------------------------------------------------------------------------------------------------------------------------------------------------------------------------------------------------------------------------------------------------------------------------------------------------------------------------------------------------------------------------------------------------------------------------------------------------------------------------------------------------------------------------------------------------------------------------------------------------------------------------------------------------------------------------------------------------------------------------------------------------------------------------------------------------------------------------------------------------------------------------------------------------------------------|------------------------------------------------------------|-------------|-------------|------------|--------------|----------|-------------|

195:01e / DPB1\* 212:01e / DPB1\* 224:01e /  
 DPB1\* 225:01e / DPB1\* 228:01e / DPB1\*  
 231:01e / DPB1\* 232:01e / DPB1\* 240:01e /  
 DPB1\* 253:01e / DPB1\* 255:01e / DPB1\*  
 262:01e / DPB1\* 272:01e / DPB1\* 275:01e /  
 DPB1\* 276:01e / DPB1\* 281:01e / DPB1\*  
 282:01e / DPB1\* 283:01e / DPB1\* 298:01e /  
 DPB1\* 320:01e / DPB1\* 323:01e / DPB1\*  
 335:01e / DPB1\* 336:01e / DPB1\* 341:01e /  
 DPB1\* 356:01e / DPB1\* 360:01e / DPB1\*  
 372:01e / DPB1\* 376:01e / DPB1\* 378:01e /  
 DPB1\* 396:01e / DPB1\* 397:01e / DPB1\*  
 418:01e / DPB1\* 425:01e / DPB1\* 426:01e /  
 DPB1\* 428:01e / DPB1\* 434:01e / DPB1\*  
 453:01e / DPB1\* 455:01Ne / DPB1\* 465:01e /  
 DPB1\* 468:01e / DPB1\* 475:01e / DPB1\*  
 476:01e / DPB1\* 479:01e / DPB1\* 485:01e /  
 DPB1\* 486:01e / DPB1\* 487:01e / DPB1\*  
 497:01e / DPB1\* 500:01e / DPB1\* 520:01e /  
 DPB1\* 521:01e / DPB1\* 522:01e / DPB1\*  
 524:01e / DPB1\* 529:01e / DPB1\* 553:01e /  
 DPB1\* 554:01e / DPB1\* 556:01e / DPB1\*  
 559:01e / DPB1\* 569:01e / DPB1\* 575:01e /  
 DPB1\* 578:01e / DPB1\* 583:01e / DPB1\*  
 591:01e / DPB1\* 593:01e / DPB1\* 607:01e /  
 DPB1\* 614:01e / DPB1\* 625:01e / DPB1\*  
 643:01e / DPB1\* 658:01e / DPB1\* 666:01e /  
 DPB1\* 682:01e / DPB1\* 683:01e / DPB1\*  
 694:01e / DPB1\* 722:01e / DPB1\* 739:01e /  
 DPB1\* 742:01e / DPB1\* 750:01e / DPB1\*  
 754:01Ne / DPB1\* 756:01Ne / DPB1\*  
 758:01e / DPB1\* 761:01e / DPB1\* 769:01e /  
 DPB1\* 772:01e / DPB1\* 773:01e / DPB1\*  
 788:01e / DPB1\* 795:01e / DPB1\* 803:01e /  
 DPB1\* 808:01e / DPB1\* 811:01e / DPB1\*  
 812:01e / DPB1\* 814:01e / DPB1\* 837:01e /  
 DPB1\* 842:01e / DPB1\* 852:01e / DPB1\*  
 878:01Ne / DPB1\* 895:01e / DPB1\* 915:01e /  
 DPB1\* 957:01e / DPB1\* 966:01e / DPB1\*  
 974:01Ne / DPB1\* 993:01e / DPB1\*  
 1040:01e / DPB1\* 1042:01e / DPB1\*  
 1048:01e / DPB1\* 1060:01e / DPB1\*  
 1062:01e / DPB1\* 1064:01e / DPB1\*  
 1066:01e / DPB1\* 1108:01e / DPB1\*  
 1112:01Ne / DPB1\* 1113:01e / DPB1\*  
 1121:01Ne / DPB1\* 1139:01e / DPB1\*  
 1167:01e

**EDP642**

DPB1\* 642:01e

-

LFQG

EEFA

DAE

ILEEK

M

GGPM

1 rare

*One side of this epitope requires a RARE allele, review results to confirm assignment.*

OR

| EPITYPE                              | ALLELES                                                                                                                                                                                                                                                           | P GROUP                                 | HVR-A | HVR-B | HVR-C | HVR-D | HVR-E | HVR-F |
|--------------------------------------|-------------------------------------------------------------------------------------------------------------------------------------------------------------------------------------------------------------------------------------------------------------------|-----------------------------------------|-------|-------|-------|-------|-------|-------|
| <b>EDP04</b><br>1 common<br>289 rare | DPB1* 04:01:01:01, 04:01:01:02e,<br>04:01:01:03e, 04:01:01:04e, 04:01:01:05e,<br>04:01:01:06e, 04:01:01:07e, 04:01:01:08e,<br>04:01:01:09e, 04:01:01:10e, 04:01:01:11e,<br>04:01:01:12e, 04:01:01:13e, 04:01:01:14e,<br>04:01:01:15e, 04:01:01:16e, 04:01:01:17e, | 04:01P<br>213:01P<br>334:01P<br>523:01P | LFQG  | EEFA  | AAE   | ILEEK | M     | GGPM  |

04:01:01:18e, 04:01:01:19e, 04:01:01:20e,  
04:01:01:21e, 04:01:01:22e, 04:01:01:23e,  
04:01:01:25e, 04:01:01:26e, 04:01:01:27e,  
04:01:01:28e, 04:01:01:29e, 04:01:01:30e,  
04:01:01:31e, 04:01:01:32e, 04:01:01:33e,  
04:01:01:34e, 04:01:01:35e, 04:01:01:36e,  
04:01:01:37e, 04:01:01:38e, 04:01:01:39e,  
04:01:01:40e, 04:01:01:41e, 04:01:01:42e,  
04:01:01:43e, 04:01:01:44e, 04:01:01:45e,  
04:01:01:46e, 04:01:01:47e, 04:01:01:48e,  
04:01:01:49e, 04:01:01:50e, 04:01:01:51e,  
04:01:01:52e, 04:01:01:53e, 04:01:02e,  
04:01:03e, 04:01:04:01e, 04:01:04:02e,  
04:01:05e, 04:01:06e, 04:01:07e, 04:01:08e,  
04:01:09e, 04:01:10e, 04:01:11e, 04:01:12e,  
04:01:14e, 04:01:15e, 04:01:16e, 04:01:17e,  
04:01:18e, 04:01:19e, 04:01:20e, 04:01:21e,  
04:01:22e, 04:01:23e, 04:01:24e, 04:01:25e,  
04:01:26e, 04:01:27e, 04:01:28e, 04:01:29e,  
04:01:30e, 04:01:31e, 04:01:32e, 04:01:33e,  
04:01:34e, 04:01:35e, 04:01:36e,  
04:01:37:01e, 04:01:37:02e, 04:01:38e,  
04:01:39:01e, 04:01:39:02e, 04:01:40e,  
04:01:41e, 04:01:42e, 04:01:43e, 04:01:44e,  
04:01:45e, 04:01:46e, 04:01:47e, 04:01:48e,  
04:01:49e, 04:01:50e / DPB1\* 213:01:01e,  
213:01:02e / DPB1\* 334:01:01e, 334:01:02e /  
DPB1\* 350:01e / DPB1\* 415:01e / DPB1\*  
459:01e / DPB1\* 464:01e / DPB1\*  
523:01:01e, 523:01:02e / DPB1\* 534:01e /  
DPB1\* 615:01e / DPB1\* 618:01e / DPB1\*  
670:01e / DPB1\* 677:01e / DPB1\* 699:01e /  
DPB1\* 755:01e / DPB1\* 757:01e / DPB1\*  
765:01e / DPB1\* 767:01e / DPB1\* 784:01e /  
DPB1\* 804:01e / DPB1\* 806:01:01:01e,  
806:01:01:02e / DPB1\* 813:01e / DPB1\*  
820:01e / DPB1\* 824:01:01e, 824:01:02e /  
DPB1\* 826:01e / DPB1\* 850:01e / DPB1\*  
859:01e / DPB1\* 880:01e / DPB1\* 882:01e /  
DPB1\* 926:01e / DPB1\* 932:01e / DPB1\*  
939:01e / DPB1\* 978:01e / DPB1\* 988:01e /  
DPB1\* 989:01e / DPB1\* 992:01e / DPB1\*  
997:01e / DPB1\* 1001:01e / DPB1\*  
1002:01e / DPB1\* 1003:01e / DPB1\*  
1004:01e / DPB1\* 1010:01e / DPB1\*  
1011:01e / DPB1\* 1023:01e / DPB1\*  
1033:01e / DPB1\* 1074:01e / DPB1\*  
1086:01e / DPB1\* 1091:01e / DPB1\*  
1100:01e / DPB1\* 1129:01e / DPB1\*  
1132:01e / DPB1\* 1146:01e / DPB1\*  
1148:01Qe / DPB1\* 1152:01e / DPB1\*  
1155:01e / DPB1\* 1161:01e / DPB1\*  
1164:01e

DPB1\* 04:01:01:24Ne / DPB1\* 99:01e /  
DPB1\* 120:01Ne / DPB1\* 121:01e / DPB1\*  
128:01e / DPB1\* 134:01e / DPB1\* 149:01e /  
DPB1\* 169:01e / DPB1\* 174:01e / DPB1\*  
175:01e / DPB1\* 180:01e / DPB1\* 181:01e /  
DPB1\* 192:01e / DPB1\* 194:01e / DPB1\*  
195:01e / DPB1\* 212:01e / DPB1\* 224:01e /  
DPB1\* 225:01e / DPB1\* 228:01e / DPB1\*  
231:01e / DPB1\* 232:01e / DPB1\* 240:01e /  
DPB1\* 253:01e / DPB1\* 255:01e / DPB1\*  
262:01e / DPB1\* 272:01e / DPB1\* 275:01e /  
DPB1\* 276:01e / DPB1\* 281:01e / DPB1\*

-

282:01e / DPB1\* 283:01e / DPB1\* 298:01e /  
 DPB1\* 320:01e / DPB1\* 323:01e / DPB1\*  
 335:01e / DPB1\* 336:01e / DPB1\* 341:01e /  
 DPB1\* 356:01e / DPB1\* 360:01e / DPB1\*  
 372:01e / DPB1\* 376:01e / DPB1\* 378:01e /  
 DPB1\* 396:01e / DPB1\* 397:01e / DPB1\*  
 418:01e / DPB1\* 425:01e / DPB1\* 426:01e /  
 DPB1\* 428:01e / DPB1\* 434:01e / DPB1\*  
 453:01e / DPB1\* 455:01Ne / DPB1\* 465:01e /  
 DPB1\* 468:01e / DPB1\* 475:01e / DPB1\*  
 476:01e / DPB1\* 479:01e / DPB1\* 485:01e /  
 DPB1\* 486:01e / DPB1\* 487:01e / DPB1\*  
 497:01e / DPB1\* 500:01e / DPB1\* 520:01e /  
 DPB1\* 521:01e / DPB1\* 522:01e / DPB1\*  
 524:01e / DPB1\* 529:01e / DPB1\* 553:01e /  
 DPB1\* 554:01e / DPB1\* 556:01e / DPB1\*  
 559:01e / DPB1\* 569:01e / DPB1\* 575:01e /  
 DPB1\* 578:01e / DPB1\* 583:01e / DPB1\*  
 591:01e / DPB1\* 593:01e / DPB1\* 607:01e /  
 DPB1\* 614:01e / DPB1\* 625:01e / DPB1\*  
 643:01e / DPB1\* 658:01e / DPB1\* 666:01e /  
 DPB1\* 682:01e / DPB1\* 683:01e / DPB1\*  
 694:01e / DPB1\* 722:01e / DPB1\* 739:01e /  
 DPB1\* 742:01e / DPB1\* 750:01e / DPB1\*  
 754:01Ne / DPB1\* 756:01Ne / DPB1\*  
 758:01e / DPB1\* 761:01e / DPB1\* 769:01e /  
 DPB1\* 772:01e / DPB1\* 773:01e / DPB1\*  
 788:01e / DPB1\* 795:01e / DPB1\* 803:01e /  
 DPB1\* 808:01e / DPB1\* 811:01e / DPB1\*  
 812:01e / DPB1\* 814:01e / DPB1\* 837:01e /  
 DPB1\* 842:01e / DPB1\* 852:01e / DPB1\*  
 878:01Ne / DPB1\* 895:01e / DPB1\* 915:01e /  
 DPB1\* 957:01e / DPB1\* 966:01e / DPB1\*  
 974:01Ne / DPB1\* 993:01e / DPB1\*  
 1040:01e / DPB1\* 1042:01e / DPB1\*  
 1048:01e / DPB1\* 1060:01e / DPB1\*  
 1062:01e / DPB1\* 1064:01e / DPB1\*  
 1066:01e / DPB1\* 1108:01e / DPB1\*  
 1112:01Ne / DPB1\* 1113:01e / DPB1\*  
 1121:01Ne / DPB1\* 1139:01e / DPB1\*  
 1167:01e

**EDP1081**

DPB1\* 1081:01e

-

LFQG

EEFA

AAE

VLEEK

M

GGPM

1 rare

*One side of this epitope requires a RARE allele, review results to confirm assignment.*

OR

| EPITYPE                              | ALLELES                                                                                                                                                                                                                                                                                                                                                                                                                                                                                                                                         | P GROUP                                 | HVR-A | HVR-B | HVR-C | HVR-D | HVR-E | HVR-F |
|--------------------------------------|-------------------------------------------------------------------------------------------------------------------------------------------------------------------------------------------------------------------------------------------------------------------------------------------------------------------------------------------------------------------------------------------------------------------------------------------------------------------------------------------------------------------------------------------------|-----------------------------------------|-------|-------|-------|-------|-------|-------|
| <b>EDP04</b><br>1 common<br>289 rare | DPB1* 04:01:01:01, 04:01:01:02e,<br>04:01:01:03e, 04:01:01:04e, 04:01:01:05e,<br>04:01:01:06e, 04:01:01:07e, 04:01:01:08e,<br>04:01:01:09e, 04:01:01:10e, 04:01:01:11e,<br>04:01:01:12e, 04:01:01:13e, 04:01:01:14e,<br>04:01:01:15e, 04:01:01:16e, 04:01:01:17e,<br>04:01:01:18e, 04:01:01:19e, 04:01:01:20e,<br>04:01:01:21e, 04:01:01:22e, 04:01:01:23e,<br>04:01:01:25e, 04:01:01:26e, 04:01:01:27e,<br>04:01:01:28e, 04:01:01:29e, 04:01:01:30e,<br>04:01:01:31e, 04:01:01:32e, 04:01:01:33e,<br>04:01:01:34e, 04:01:01:35e, 04:01:01:36e, | 04:01P<br>213:01P<br>334:01P<br>523:01P | LFQG  | EEFA  | AAE   | ILEEK | M     | GGPM  |

04:01:01:37e, 04:01:01:38e, 04:01:01:39e,  
04:01:01:40e, 04:01:01:41e, 04:01:01:42e,  
04:01:01:43e, 04:01:01:44e, 04:01:01:45e,  
04:01:01:46e, 04:01:01:47e, 04:01:01:48e,  
04:01:01:49e, 04:01:01:50e, 04:01:01:51e,  
04:01:01:52e, 04:01:01:53e, 04:01:02e,  
04:01:03e, 04:01:04:01e, 04:01:04:02e,  
04:01:05e, 04:01:06e, 04:01:07e, 04:01:08e,  
04:01:09e, 04:01:10e, 04:01:11e, 04:01:12e,  
04:01:14e, 04:01:15e, 04:01:16e, 04:01:17e,  
04:01:18e, 04:01:19e, 04:01:20e, 04:01:21e,  
04:01:22e, 04:01:23e, 04:01:24e, 04:01:25e,  
04:01:26e, 04:01:27e, 04:01:28e, 04:01:29e,  
04:01:30e, 04:01:31e, 04:01:32e, 04:01:33e,  
04:01:34e, 04:01:35e, 04:01:36e,  
04:01:37:01e, 04:01:37:02e, 04:01:38e,  
04:01:39:01e, 04:01:39:02e, 04:01:40e,  
04:01:41e, 04:01:42e, 04:01:43e, 04:01:44e,  
04:01:45e, 04:01:46e, 04:01:47e, 04:01:48e,  
04:01:49e, 04:01:50e / DPB1\* 213:01:01e,  
213:01:02e / DPB1\* 334:01:01e, 334:01:02e /  
DPB1\* 350:01e / DPB1\* 415:01e / DPB1\*  
459:01e / DPB1\* 464:01e / DPB1\*  
523:01:01e, 523:01:02e / DPB1\* 534:01e /  
DPB1\* 615:01e / DPB1\* 618:01e / DPB1\*  
670:01e / DPB1\* 677:01e / DPB1\* 699:01e /  
DPB1\* 755:01e / DPB1\* 757:01e / DPB1\*  
765:01e / DPB1\* 767:01e / DPB1\* 784:01e /  
DPB1\* 804:01e / DPB1\* 806:01:01:01e,  
806:01:01:02e / DPB1\* 813:01e / DPB1\*  
820:01e / DPB1\* 824:01:01e, 824:01:02e /  
DPB1\* 826:01e / DPB1\* 850:01e / DPB1\*  
859:01e / DPB1\* 880:01e / DPB1\* 882:01e /  
DPB1\* 926:01e / DPB1\* 932:01e / DPB1\*  
939:01e / DPB1\* 978:01e / DPB1\* 988:01e /  
DPB1\* 989:01e / DPB1\* 992:01e / DPB1\*  
997:01e / DPB1\* 1001:01e / DPB1\*  
1002:01e / DPB1\* 1003:01e / DPB1\*  
1004:01e / DPB1\* 1010:01e / DPB1\*  
1011:01e / DPB1\* 1023:01e / DPB1\*  
1033:01e / DPB1\* 1074:01e / DPB1\*  
1086:01e / DPB1\* 1091:01e / DPB1\*  
1100:01e / DPB1\* 1129:01e / DPB1\*  
1132:01e / DPB1\* 1146:01e / DPB1\*  
1148:01Qe / DPB1\* 1152:01e / DPB1\*  
1155:01e / DPB1\* 1161:01e / DPB1\*  
1164:01e

DPB1\* 04:01:01:24Ne / DPB1\* 99:01e /  
DPB1\* 120:01Ne / DPB1\* 121:01e / DPB1\*  
128:01e / DPB1\* 134:01e / DPB1\* 149:01e /  
DPB1\* 169:01e / DPB1\* 174:01e / DPB1\*  
175:01e / DPB1\* 180:01e / DPB1\* 181:01e /  
DPB1\* 192:01e / DPB1\* 194:01e / DPB1\*  
195:01e / DPB1\* 212:01e / DPB1\* 224:01e /  
DPB1\* 225:01e / DPB1\* 228:01e / DPB1\*  
231:01e / DPB1\* 232:01e / DPB1\* 240:01e /  
DPB1\* 253:01e / DPB1\* 255:01e / DPB1\*  
262:01e / DPB1\* 272:01e / DPB1\* 275:01e /  
DPB1\* 276:01e / DPB1\* 281:01e / DPB1\*  
282:01e / DPB1\* 283:01e / DPB1\* 298:01e /  
DPB1\* 320:01e / DPB1\* 323:01e / DPB1\*  
335:01e / DPB1\* 336:01e / DPB1\* 341:01e /  
DPB1\* 356:01e / DPB1\* 360:01e / DPB1\*  
372:01e / DPB1\* 376:01e / DPB1\* 378:01e /  
DPB1\* 396:01e / DPB1\* 397:01e / DPB1\*

-

418:01e / DPB1\* 425:01e / DPB1\* 426:01e /  
 DPB1\* 428:01e / DPB1\* 434:01e / DPB1\*  
 453:01e / DPB1\* 455:01Ne / DPB1\* 465:01e /  
 DPB1\* 468:01e / DPB1\* 475:01e / DPB1\*  
 476:01e / DPB1\* 479:01e / DPB1\* 485:01e /  
 DPB1\* 486:01e / DPB1\* 487:01e / DPB1\*  
 497:01e / DPB1\* 500:01e / DPB1\* 520:01e /  
 DPB1\* 521:01e / DPB1\* 522:01e / DPB1\*  
 524:01e / DPB1\* 529:01e / DPB1\* 553:01e /  
 DPB1\* 554:01e / DPB1\* 556:01e / DPB1\*  
 559:01e / DPB1\* 569:01e / DPB1\* 575:01e /  
 DPB1\* 578:01e / DPB1\* 583:01e / DPB1\*  
 591:01e / DPB1\* 593:01e / DPB1\* 607:01e /  
 DPB1\* 614:01e / DPB1\* 625:01e / DPB1\*  
 643:01e / DPB1\* 658:01e / DPB1\* 666:01e /  
 DPB1\* 682:01e / DPB1\* 683:01e / DPB1\*  
 694:01e / DPB1\* 722:01e / DPB1\* 739:01e /  
 DPB1\* 742:01e / DPB1\* 750:01e / DPB1\*  
 754:01Ne / DPB1\* 756:01Ne / DPB1\*  
 758:01e / DPB1\* 761:01e / DPB1\* 769:01e /  
 DPB1\* 772:01e / DPB1\* 773:01e / DPB1\*  
 788:01e / DPB1\* 795:01e / DPB1\* 803:01e /  
 DPB1\* 808:01e / DPB1\* 811:01e / DPB1\*  
 812:01e / DPB1\* 814:01e / DPB1\* 837:01e /  
 DPB1\* 842:01e / DPB1\* 852:01e / DPB1\*  
 878:01Ne / DPB1\* 895:01e / DPB1\* 915:01e /  
 DPB1\* 957:01e / DPB1\* 966:01e / DPB1\*  
 974:01Ne / DPB1\* 993:01e / DPB1\*  
 1040:01e / DPB1\* 1042:01e / DPB1\*  
 1048:01e / DPB1\* 1060:01e / DPB1\*  
 1062:01e / DPB1\* 1064:01e / DPB1\*  
 1066:01e / DPB1\* 1108:01e / DPB1\*  
 1112:01Ne / DPB1\* 1113:01e / DPB1\*  
 1121:01Ne / DPB1\* 1139:01e / DPB1\*  
 1167:01e

**EDP278**

DPB1\* 278:01e

-

LFQG

EEFA

AAE

ILEEK

I

GGPM

1 rare

*One side of this epitope requires a RARE allele, review results to confirm assignment.*

OR

| EPITYPE                 | ALLELES                                                            | P GROUP | HVR-A | HVR-B | HVR-C | HVR-D | HVR-E | HVR-F |
|-------------------------|--------------------------------------------------------------------|---------|-------|-------|-------|-------|-------|-------|
| <b>EDP218</b><br>4 rare | DPB1* 696:01Ne / DPB1* 838:01Ne / DPB1* 868:01Ne / DPB1* 1079:01Ne | -       | LFQG  | -     | -     | -     | -     | -     |
| <b>EDP218</b><br>4 rare | DPB1* 696:01Ne / DPB1* 838:01Ne / DPB1* 868:01Ne / DPB1* 1079:01Ne | -       | LFQG  | -     | -     | -     | -     | -     |

*This genotype consists of alleles from a single group.  
 One side of this epitope requires a RARE allele, review results to confirm assignment.*

OR

| EPITYPE | ALLELES | P GROUP | HVR-A | HVR-B | HVR-C | HVR-D | HVR-E | HVR-F |
|---------|---------|---------|-------|-------|-------|-------|-------|-------|
|---------|---------|---------|-------|-------|-------|-------|-------|-------|

|                                                                                               |                                                                    |   |      |      |     |       |   |   |
|-----------------------------------------------------------------------------------------------|--------------------------------------------------------------------|---|------|------|-----|-------|---|---|
| <b>EDP216</b><br>3 rare                                                                       | DPB1* 216:01Ne / DPB1* 357:01Ne / DPB1* 1044:01Ne                  | - | LFQG | EEFA | AAE | ILEEK | M | - |
| <b>EDP218</b><br>4 rare                                                                       | DPB1* 696:01Ne / DPB1* 838:01Ne / DPB1* 868:01Ne / DPB1* 1079:01Ne | - | LFQG | -    | -   | -     | - | - |
| <i>Both sides of this epitype require RARE alleles, review results to confirm assignment.</i> |                                                                    |   |      |      |     |       |   |   |

OR

| EPITYPE                                                                                       | ALLELES                                                            | P GROUP | HVR-A | HVR-B | HVR-C | HVR-D | HVR-E | HVR-F |
|-----------------------------------------------------------------------------------------------|--------------------------------------------------------------------|---------|-------|-------|-------|-------|-------|-------|
| <b>EDP218</b><br>4 rare                                                                       | DPB1* 696:01Ne / DPB1* 838:01Ne / DPB1* 868:01Ne / DPB1* 1079:01Ne | -       | LFQG  | -     | -     | -     | -     | -     |
| <b>EDP743</b><br>3 rare                                                                       | DPB1* 743:01Ne / DPB1* 748:01Ne / DPB1* 844:01Ne                   | -       | LFQG  | EEFA  | AAE   | -     | -     | -     |
| <i>Both sides of this epitype require RARE alleles, review results to confirm assignment.</i> |                                                                    |         |       |       |       |       |       |       |

OR

| EPITYPE                                                                                       | ALLELES                                                            | P GROUP | HVR-A | HVR-B | HVR-C | HVR-D | HVR-E | HVR-F |
|-----------------------------------------------------------------------------------------------|--------------------------------------------------------------------|---------|-------|-------|-------|-------|-------|-------|
| <b>EDP218</b><br>4 rare                                                                       | DPB1* 696:01Ne / DPB1* 838:01Ne / DPB1* 868:01Ne / DPB1* 1079:01Ne | -       | LFQG  | -     | -     | -     | -     | -     |
| <b>EDP227</b><br>3 rare                                                                       | DPB1* 227:01:01e, 227:01:02e, 227:01:03e                           | 227:01P | LFQG  | EELA  | AAE   | ILEEK | M     | GGPM  |
| <i>Both sides of this epitype require RARE alleles, review results to confirm assignment.</i> |                                                                    |         |       |       |       |       |       |       |

OR

| EPITYPE                                                                                       | ALLELES                                           | P GROUP | HVR-A | HVR-B | HVR-C | HVR-D | HVR-E | HVR-F |
|-----------------------------------------------------------------------------------------------|---------------------------------------------------|---------|-------|-------|-------|-------|-------|-------|
| <b>EDP216</b><br>3 rare                                                                       | DPB1* 216:01Ne / DPB1* 357:01Ne / DPB1* 1044:01Ne | -       | LFQG  | EEFA  | AAE   | ILEEK | M     | -     |
| <b>EDP743</b><br>3 rare                                                                       | DPB1* 743:01Ne / DPB1* 748:01Ne / DPB1* 844:01Ne  | -       | LFQG  | EEFA  | AAE   | -     | -     | -     |
| <i>Both sides of this epitype require RARE alleles, review results to confirm assignment.</i> |                                                   |         |       |       |       |       |       |       |

OR

| EPITYPE | ALLELES | P GROUP | HVR-A | HVR-B | HVR-C | HVR-D | HVR-E | HVR-F |
|---------|---------|---------|-------|-------|-------|-------|-------|-------|
|---------|---------|---------|-------|-------|-------|-------|-------|-------|



|                                                                                               |                                                   |         |      |      |     |       |   |      |
|-----------------------------------------------------------------------------------------------|---------------------------------------------------|---------|------|------|-----|-------|---|------|
| <b>EDP216</b><br>3 rare                                                                       | DPB1* 216:01Ne / DPB1* 357:01Ne / DPB1* 1044:01Ne | -       | LFQG | EEFA | AAE | ILEEK | M | -    |
| <b>EDP227</b><br>3 rare                                                                       | DPB1* 227:01:01e, 227:01:02e, 227:01:03e          | 227:01P | LFQG | EELA | AAE | ILEEK | M | GGPM |
| <i>Both sides of this epitype require RARE alleles, review results to confirm assignment.</i> |                                                   |         |      |      |     |       |   |      |

OR

| EPITYPE                                                                                       | ALLELES                                          | P GROUP | HVR-A | HVR-B | HVR-C | HVR-D | HVR-E | HVR-F |
|-----------------------------------------------------------------------------------------------|--------------------------------------------------|---------|-------|-------|-------|-------|-------|-------|
| <b>EDP227</b><br>3 rare                                                                       | DPB1* 227:01:01e, 227:01:02e, 227:01:03e         | 227:01P | LFQG  | EELA  | AAE   | ILEEK | M     | GGPM  |
| <b>EDP743</b><br>3 rare                                                                       | DPB1* 743:01Ne / DPB1* 748:01Ne / DPB1* 844:01Ne | -       | LFQG  | EEFA  | AAE   | -     | -     | -     |
| <i>Both sides of this epitype require RARE alleles, review results to confirm assignment.</i> |                                                  |         |       |       |       |       |       |       |

OR

| EPITYPE                                                                                                                                                  | ALLELES                                           | P GROUP | HVR-A | HVR-B | HVR-C | HVR-D | HVR-E | HVR-F |
|----------------------------------------------------------------------------------------------------------------------------------------------------------|---------------------------------------------------|---------|-------|-------|-------|-------|-------|-------|
| <b>EDP216</b><br>3 rare                                                                                                                                  | DPB1* 216:01Ne / DPB1* 357:01Ne / DPB1* 1044:01Ne | -       | LFQG  | EEFA  | AAE   | ILEEK | M     | -     |
| <b>EDP216</b><br>3 rare                                                                                                                                  | DPB1* 216:01Ne / DPB1* 357:01Ne / DPB1* 1044:01Ne | -       | LFQG  | EEFA  | AAE   | ILEEK | M     | -     |
| <i>This genotype consists of alleles from a single group.<br/>One side of this epitype requires a RARE allele, review results to confirm assignment.</i> |                                                   |         |       |       |       |       |       |       |

OR

| EPITYPE                                                                                                                                                  | ALLELES                                          | P GROUP | HVR-A | HVR-B | HVR-C | HVR-D | HVR-E | HVR-F |
|----------------------------------------------------------------------------------------------------------------------------------------------------------|--------------------------------------------------|---------|-------|-------|-------|-------|-------|-------|
| <b>EDP743</b><br>3 rare                                                                                                                                  | DPB1* 743:01Ne / DPB1* 748:01Ne / DPB1* 844:01Ne | -       | LFQG  | EEFA  | AAE   | -     | -     | -     |
| <b>EDP743</b><br>3 rare                                                                                                                                  | DPB1* 743:01Ne / DPB1* 748:01Ne / DPB1* 844:01Ne | -       | LFQG  | EEFA  | AAE   | -     | -     | -     |
| <i>This genotype consists of alleles from a single group.<br/>One side of this epitype requires a RARE allele, review results to confirm assignment.</i> |                                                  |         |       |       |       |       |       |       |

OR

| EPITYPE | ALLELES | P GROUP | HVR-A | HVR-B | HVR-C | HVR-D | HVR-E | HVR-F |
|---------|---------|---------|-------|-------|-------|-------|-------|-------|
|---------|---------|---------|-------|-------|-------|-------|-------|-------|

|                         |                                          |         |      |      |     |       |   |      |
|-------------------------|------------------------------------------|---------|------|------|-----|-------|---|------|
| <b>EDP227</b><br>3 rare | DPB1* 227:01:01e, 227:01:02e, 227:01:03e | 227:01P | LFQG | EELA | AAE | ILEEK | M | GGPM |
| <b>EDP227</b><br>3 rare | DPB1* 227:01:01e, 227:01:02e, 227:01:03e | 227:01P | LFQG | EELA | AAE | ILEEK | M | GGPM |

*This genotype consists of alleles from a single group.  
One side of this epitope requires a RARE allele, review results to confirm assignment.*

OR

| EPITYPE                  | ALLELES                                                            | P GROUP | HVR-A | HVR-B | HVR-C | HVR-D | HVR-E | HVR-F |
|--------------------------|--------------------------------------------------------------------|---------|-------|-------|-------|-------|-------|-------|
| <b>EDP218</b><br>4 rare  | DPB1* 696:01Ne / DPB1* 838:01Ne / DPB1* 868:01Ne / DPB1* 1079:01Ne | -       | LFQG  | -     | -     | -     | -     | -     |
| <b>EDP1016</b><br>2 rare | DPB1* 1016:01e / DPB1* 1138:01e                                    | -       | LLQG  | EEFA  | AAE   | ILEEK | M     | GGPM  |

*Both sides of this epitope require RARE alleles, review results to confirm assignment.*

OR

| EPITYPE                 | ALLELES                                                            | P GROUP | HVR-A | HVR-B | HVR-C | HVR-D | HVR-E | HVR-F |
|-------------------------|--------------------------------------------------------------------|---------|-------|-------|-------|-------|-------|-------|
| <b>EDP218</b><br>4 rare | DPB1* 696:01Ne / DPB1* 838:01Ne / DPB1* 868:01Ne / DPB1* 1079:01Ne | -       | LFQG  | -     | -     | -     | -     | -     |
| <b>EDP279</b><br>2 rare | DPB1* 279:01:01e, 279:01:02e                                       | 279:01P | LFQG  | EEFA  | AAE   | ILEEK | M     | GRPM  |

*Both sides of this epitope require RARE alleles, review results to confirm assignment.*

OR

| EPITYPE                  | ALLELES                                           | P GROUP | HVR-A | HVR-B | HVR-C | HVR-D | HVR-E | HVR-F |
|--------------------------|---------------------------------------------------|---------|-------|-------|-------|-------|-------|-------|
| <b>EDP216</b><br>3 rare  | DPB1* 216:01Ne / DPB1* 357:01Ne / DPB1* 1044:01Ne | -       | LFQG  | EEFA  | AAE   | ILEEK | M     | -     |
| <b>EDP1016</b><br>2 rare | DPB1* 1016:01e / DPB1* 1138:01e                   | -       | LLQG  | EEFA  | AAE   | ILEEK | M     | GGPM  |

*Both sides of this epitope require RARE alleles, review results to confirm assignment.*

OR

| EPITYPE | ALLELES | P GROUP | HVR-A | HVR-B | HVR-C | HVR-D | HVR-E | HVR-F |
|---------|---------|---------|-------|-------|-------|-------|-------|-------|
|---------|---------|---------|-------|-------|-------|-------|-------|-------|

|                                                                                               |                                                   |         |      |      |     |       |   |      |
|-----------------------------------------------------------------------------------------------|---------------------------------------------------|---------|------|------|-----|-------|---|------|
| <b>EDP216</b><br>3 rare                                                                       | DPB1* 216:01Ne / DPB1* 357:01Ne / DPB1* 1044:01Ne | -       | LFQG | EEFA | AAE | ILEEK | M | -    |
| <b>EDP279</b><br>2 rare                                                                       | DPB1* 279:01:01e, 279:01:02e                      | 279:01P | LFQG | EEFA | AAE | ILEEK | M | GRPM |
| <i>Both sides of this epitope require RARE alleles, review results to confirm assignment.</i> |                                                   |         |      |      |     |       |   |      |

OR

| EPITYPE                                                                                       | ALLELES                                          | P GROUP | HVR-A | HVR-B | HVR-C | HVR-D | HVR-E | HVR-F |
|-----------------------------------------------------------------------------------------------|--------------------------------------------------|---------|-------|-------|-------|-------|-------|-------|
| <b>EDP743</b><br>3 rare                                                                       | DPB1* 743:01Ne / DPB1* 748:01Ne / DPB1* 844:01Ne | -       | LFQG  | EEFA  | AAE   | -     | -     | -     |
| <b>EDP1016</b><br>2 rare                                                                      | DPB1* 1016:01e / DPB1* 1138:01e                  | -       | LLQG  | EEFA  | AAE   | ILEEK | M     | GGPM  |
| <i>Both sides of this epitope require RARE alleles, review results to confirm assignment.</i> |                                                  |         |       |       |       |       |       |       |

OR

| EPITYPE                                                                                       | ALLELES                                          | P GROUP | HVR-A | HVR-B | HVR-C | HVR-D | HVR-E | HVR-F |
|-----------------------------------------------------------------------------------------------|--------------------------------------------------|---------|-------|-------|-------|-------|-------|-------|
| <b>EDP279</b><br>2 rare                                                                       | DPB1* 279:01:01e, 279:01:02e                     | 279:01P | LFQG  | EEFA  | AAE   | ILEEK | M     | GRPM  |
| <b>EDP743</b><br>3 rare                                                                       | DPB1* 743:01Ne / DPB1* 748:01Ne / DPB1* 844:01Ne | -       | LFQG  | EEFA  | AAE   | -     | -     | -     |
| <i>Both sides of this epitope require RARE alleles, review results to confirm assignment.</i> |                                                  |         |       |       |       |       |       |       |

OR

| EPITYPE                                                                                       | ALLELES                                  | P GROUP | HVR-A | HVR-B | HVR-C | HVR-D | HVR-E | HVR-F |
|-----------------------------------------------------------------------------------------------|------------------------------------------|---------|-------|-------|-------|-------|-------|-------|
| <b>EDP227</b><br>3 rare                                                                       | DPB1* 227:01:01e, 227:01:02e, 227:01:03e | 227:01P | LFQG  | EELA  | AAE   | ILEEK | M     | GGPM  |
| <b>EDP1016</b><br>2 rare                                                                      | DPB1* 1016:01e / DPB1* 1138:01e          | -       | LLQG  | EEFA  | AAE   | ILEEK | M     | GGPM  |
| <i>Both sides of this epitope require RARE alleles, review results to confirm assignment.</i> |                                          |         |       |       |       |       |       |       |

OR

| EPITYPE | ALLELES | P GROUP | HVR-A | HVR-B | HVR-C | HVR-D | HVR-E | HVR-F |
|---------|---------|---------|-------|-------|-------|-------|-------|-------|
|---------|---------|---------|-------|-------|-------|-------|-------|-------|

|                                                                                               |                                          |         |      |      |     |       |   |      |
|-----------------------------------------------------------------------------------------------|------------------------------------------|---------|------|------|-----|-------|---|------|
| <b>EDP227</b><br>3 rare                                                                       | DPB1* 227:01:01e, 227:01:02e, 227:01:03e | 227:01P | LFQG | EELA | AAE | ILEEK | M | GGPM |
| <b>EDP279</b><br>2 rare                                                                       | DPB1* 279:01:01e, 279:01:02e             | 279:01P | LFQG | EEFA | AAE | ILEEK | M | GRPM |
| <i>Both sides of this epitype require RARE alleles, review results to confirm assignment.</i> |                                          |         |      |      |     |       |   |      |

OR

| EPITYPE                                                                                                                                                  | ALLELES                         | P GROUP | HVR-A | HVR-B | HVR-C | HVR-D | HVR-E | HVR-F |
|----------------------------------------------------------------------------------------------------------------------------------------------------------|---------------------------------|---------|-------|-------|-------|-------|-------|-------|
| <b>EDP1016</b><br>2 rare                                                                                                                                 | DPB1* 1016:01e / DPB1* 1138:01e | -       | LLQG  | EEFA  | AAE   | ILEEK | M     | GGPM  |
| <b>EDP1016</b><br>2 rare                                                                                                                                 | DPB1* 1016:01e / DPB1* 1138:01e | -       | LLQG  | EEFA  | AAE   | ILEEK | M     | GGPM  |
| <i>This genotype consists of alleles from a single group.<br/>One side of this epitype requires a RARE allele, review results to confirm assignment.</i> |                                 |         |       |       |       |       |       |       |

OR

| EPITYPE                                                                                                                                                  | ALLELES                      | P GROUP | HVR-A | HVR-B | HVR-C | HVR-D | HVR-E | HVR-F |
|----------------------------------------------------------------------------------------------------------------------------------------------------------|------------------------------|---------|-------|-------|-------|-------|-------|-------|
| <b>EDP279</b><br>2 rare                                                                                                                                  | DPB1* 279:01:01e, 279:01:02e | 279:01P | LFQG  | EEFA  | AAE   | ILEEK | M     | GRPM  |
| <b>EDP279</b><br>2 rare                                                                                                                                  | DPB1* 279:01:01e, 279:01:02e | 279:01P | LFQG  | EEFA  | AAE   | ILEEK | M     | GRPM  |
| <i>This genotype consists of alleles from a single group.<br/>One side of this epitype requires a RARE allele, review results to confirm assignment.</i> |                              |         |       |       |       |       |       |       |

OR

| EPITYPE                                                                                       | ALLELES                                                            | P GROUP | HVR-A | HVR-B | HVR-C | HVR-D | HVR-E | HVR-F |
|-----------------------------------------------------------------------------------------------|--------------------------------------------------------------------|---------|-------|-------|-------|-------|-------|-------|
| <b>EDP218</b><br>4 rare                                                                       | DPB1* 696:01Ne / DPB1* 838:01Ne / DPB1* 868:01Ne / DPB1* 1079:01Ne | -       | LFQG  | -     | -     | -     | -     | -     |
| <b>EDP828</b><br>1 rare                                                                       | DPB1* 828:01e                                                      | -       | LFQG  | DEFA  | AAE   | ILEEK | M     | GGPM  |
| <i>Both sides of this epitype require RARE alleles, review results to confirm assignment.</i> |                                                                    |         |       |       |       |       |       |       |

OR

| EPITYPE | ALLELES | P GROUP | HVR-A | HVR-B | HVR-C | HVR-D | HVR-E | HVR-F |
|---------|---------|---------|-------|-------|-------|-------|-------|-------|
|---------|---------|---------|-------|-------|-------|-------|-------|-------|

|                                                                                               |                                                                    |   |      |      |     |       |   |      |
|-----------------------------------------------------------------------------------------------|--------------------------------------------------------------------|---|------|------|-----|-------|---|------|
| <b>EDP218</b><br>4 rare                                                                       | DPB1* 696:01Ne / DPB1* 838:01Ne / DPB1* 868:01Ne / DPB1* 1079:01Ne | - | LFQG | -    | -   | -     | - | -    |
| <b>EDP318</b><br>1 rare                                                                       | DPB1* 318:01e                                                      | - | LFQG | EEFT | AAE | ILEEK | M | GGPM |
| <i>Both sides of this epitype require RARE alleles, review results to confirm assignment.</i> |                                                                    |   |      |      |     |       |   |      |

OR

| EPITYPE                                                                                       | ALLELES                                                            | P GROUP | HVR-A | HVR-B | HVR-C | HVR-D | HVR-E | HVR-F |
|-----------------------------------------------------------------------------------------------|--------------------------------------------------------------------|---------|-------|-------|-------|-------|-------|-------|
| <b>EDP178</b><br>1 rare                                                                       | DPB1* 178:01e                                                      | -       | LFQG  | EEFA  | AAE   | ILEEK | M     | GGPV  |
| <b>EDP218</b><br>4 rare                                                                       | DPB1* 696:01Ne / DPB1* 838:01Ne / DPB1* 868:01Ne / DPB1* 1079:01Ne | -       | LFQG  | -     | -     | -     | -     | -     |
| <i>Both sides of this epitype require RARE alleles, review results to confirm assignment.</i> |                                                                    |         |       |       |       |       |       |       |

OR

| EPITYPE                                                                                       | ALLELES                                                            | P GROUP | HVR-A | HVR-B | HVR-C | HVR-D | HVR-E | HVR-F |
|-----------------------------------------------------------------------------------------------|--------------------------------------------------------------------|---------|-------|-------|-------|-------|-------|-------|
| <b>EDP218</b><br>4 rare                                                                       | DPB1* 696:01Ne / DPB1* 838:01Ne / DPB1* 868:01Ne / DPB1* 1079:01Ne | -       | LFQG  | -     | -     | -     | -     | -     |
| <b>EDP278</b><br>1 rare                                                                       | DPB1* 278:01e                                                      | -       | LFQG  | EEFA  | AAE   | ILEEK | I     | GGPM  |
| <i>Both sides of this epitype require RARE alleles, review results to confirm assignment.</i> |                                                                    |         |       |       |       |       |       |       |

OR

| EPITYPE                                                                                       | ALLELES                                                            | P GROUP | HVR-A | HVR-B | HVR-C | HVR-D | HVR-E | HVR-F |
|-----------------------------------------------------------------------------------------------|--------------------------------------------------------------------|---------|-------|-------|-------|-------|-------|-------|
| <b>EDP218</b><br>4 rare                                                                       | DPB1* 696:01Ne / DPB1* 838:01Ne / DPB1* 868:01Ne / DPB1* 1079:01Ne | -       | LFQG  | -     | -     | -     | -     | -     |
| <b>EDP875</b><br>1 rare                                                                       | DPB1* 875:01Ne                                                     | -       | FSRD  | RSSR  | -     | -     | -     | -     |
| <i>Both sides of this epitype require RARE alleles, review results to confirm assignment.</i> |                                                                    |         |       |       |       |       |       |       |

OR

| EPITYPE | ALLELES | P GROUP | HVR-A | HVR-B | HVR-C | HVR-D | HVR-E | HVR-F |
|---------|---------|---------|-------|-------|-------|-------|-------|-------|
|---------|---------|---------|-------|-------|-------|-------|-------|-------|

|                                                                                               |                                                                    |   |      |      |     |       |   |      |
|-----------------------------------------------------------------------------------------------|--------------------------------------------------------------------|---|------|------|-----|-------|---|------|
| <b>EDP218</b><br>4 rare                                                                       | DPB1* 696:01Ne / DPB1* 838:01Ne / DPB1* 868:01Ne / DPB1* 1079:01Ne | - | LFQG | -    | -   | -     | - | -    |
| <b>EDP375</b><br>1 rare                                                                       | DPB1* 375:01e                                                      | - | LFQG | QEFA | AAE | ILEEK | M | GGPM |
| <i>Both sides of this epitype require RARE alleles, review results to confirm assignment.</i> |                                                                    |   |      |      |     |       |   |      |

OR

| EPITYPE                                                                                       | ALLELES                                                            | P GROUP | HVR-A | HVR-B | HVR-C | HVR-D | HVR-E | HVR-F |
|-----------------------------------------------------------------------------------------------|--------------------------------------------------------------------|---------|-------|-------|-------|-------|-------|-------|
| <b>EDP218</b><br>4 rare                                                                       | DPB1* 696:01Ne / DPB1* 838:01Ne / DPB1* 868:01Ne / DPB1* 1079:01Ne | -       | LFQG  | -     | -     | -     | -     | -     |
| <b>EDP686</b><br>1 rare                                                                       | DPB1* 686:01e                                                      | -       | LFQG  | EGFA  | AAE   | ILEEK | M     | GGPM  |
| <i>Both sides of this epitype require RARE alleles, review results to confirm assignment.</i> |                                                                    |         |       |       |       |       |       |       |

OR

| EPITYPE                                                                                       | ALLELES                                                            | P GROUP | HVR-A | HVR-B | HVR-C | HVR-D | HVR-E | HVR-F |
|-----------------------------------------------------------------------------------------------|--------------------------------------------------------------------|---------|-------|-------|-------|-------|-------|-------|
| <b>EDP176</b><br>1 rare                                                                       | DPB1* 176:01e                                                      | -       | LFQG  | EEFA  | AAE   | ILKEK | M     | GGPM  |
| <b>EDP218</b><br>4 rare                                                                       | DPB1* 696:01Ne / DPB1* 838:01Ne / DPB1* 868:01Ne / DPB1* 1079:01Ne | -       | LFQG  | -     | -     | -     | -     | -     |
| <i>Both sides of this epitype require RARE alleles, review results to confirm assignment.</i> |                                                                    |         |       |       |       |       |       |       |

OR

| EPITYPE                                                                                       | ALLELES                                                            | P GROUP | HVR-A | HVR-B | HVR-C | HVR-D | HVR-E | HVR-F |
|-----------------------------------------------------------------------------------------------|--------------------------------------------------------------------|---------|-------|-------|-------|-------|-------|-------|
| <b>EDP218</b><br>4 rare                                                                       | DPB1* 696:01Ne / DPB1* 838:01Ne / DPB1* 868:01Ne / DPB1* 1079:01Ne | -       | LFQG  | -     | -     | -     | -     | -     |
| <b>EDP456</b><br>1 rare                                                                       | DPB1* 456:01e                                                      | -       | LFQG  | EEFA  | AAE   | ILEVK | M     | GGPM  |
| <i>Both sides of this epitype require RARE alleles, review results to confirm assignment.</i> |                                                                    |         |       |       |       |       |       |       |

OR

| EPITYPE | ALLELES | P GROUP | HVR-A | HVR-B | HVR-C | HVR-D | HVR-E | HVR-F |
|---------|---------|---------|-------|-------|-------|-------|-------|-------|
|---------|---------|---------|-------|-------|-------|-------|-------|-------|

|                                                                                               |                                                                    |   |      |      |     |       |   |      |
|-----------------------------------------------------------------------------------------------|--------------------------------------------------------------------|---|------|------|-----|-------|---|------|
| <b>EDP218</b><br>4 rare                                                                       | DPB1* 696:01Ne / DPB1* 838:01Ne / DPB1* 868:01Ne / DPB1* 1079:01Ne | - | LFQG | -    | -   | -     | - | -    |
| <b>EDP1097</b><br>1 rare                                                                      | DPB1* 1097:01e                                                     | - | LFLG | EEFA | AAE | ILEEK | M | GGPM |
| <i>Both sides of this epitype require RARE alleles, review results to confirm assignment.</i> |                                                                    |   |      |      |     |       |   |      |

OR

| EPITYPE                                                                                       | ALLELES                                                            | P GROUP | HVR-A | HVR-B | HVR-C | HVR-D | HVR-E | HVR-F |
|-----------------------------------------------------------------------------------------------|--------------------------------------------------------------------|---------|-------|-------|-------|-------|-------|-------|
| <b>EDP218</b><br>4 rare                                                                       | DPB1* 696:01Ne / DPB1* 838:01Ne / DPB1* 868:01Ne / DPB1* 1079:01Ne | -       | LFQG  | -     | -     | -     | -     | -     |
| <b>EDP303</b><br>1 rare                                                                       | DPB1* 303:01e                                                      | -       | LFQG  | EEFA  | AAE   | ILEER | M     | GGPM  |
| <i>Both sides of this epitype require RARE alleles, review results to confirm assignment.</i> |                                                                    |         |       |       |       |       |       |       |

OR

| EPITYPE                                                                                       | ALLELES                                                            | P GROUP | HVR-A | HVR-B | HVR-C | HVR-D | HVR-E | HVR-F |
|-----------------------------------------------------------------------------------------------|--------------------------------------------------------------------|---------|-------|-------|-------|-------|-------|-------|
| <b>EDP218</b><br>4 rare                                                                       | DPB1* 696:01Ne / DPB1* 838:01Ne / DPB1* 868:01Ne / DPB1* 1079:01Ne | -       | LFQG  | -     | -     | -     | -     | -     |
| <b>EDP753</b><br>1 rare                                                                       | DPB1* 753:01e                                                      | -       | FFQG  | EEFA  | AAE   | ILEEK | M     | GGPM  |
| <i>Both sides of this epitype require RARE alleles, review results to confirm assignment.</i> |                                                                    |         |       |       |       |       |       |       |

OR

| EPITYPE                                                                                       | ALLELES                                                            | P GROUP | HVR-A | HVR-B | HVR-C | HVR-D | HVR-E | HVR-F |
|-----------------------------------------------------------------------------------------------|--------------------------------------------------------------------|---------|-------|-------|-------|-------|-------|-------|
| <b>EDP218</b><br>4 rare                                                                       | DPB1* 696:01Ne / DPB1* 838:01Ne / DPB1* 868:01Ne / DPB1* 1079:01Ne | -       | LFQG  | -     | -     | -     | -     | -     |
| <b>EDP934</b><br>1 rare                                                                       | DPB1* 934:01Qe                                                     | -       | LFQG  | EFA   | AAE   | ILEEK | M     | GGPM  |
| <i>Both sides of this epitype require RARE alleles, review results to confirm assignment.</i> |                                                                    |         |       |       |       |       |       |       |

OR

| EPITYPE | ALLELES | P GROUP | HVR-A | HVR-B | HVR-C | HVR-D | HVR-E | HVR-F |
|---------|---------|---------|-------|-------|-------|-------|-------|-------|
|---------|---------|---------|-------|-------|-------|-------|-------|-------|

|                                                                                               |                                                                    |   |      |      |     |       |   |   |
|-----------------------------------------------------------------------------------------------|--------------------------------------------------------------------|---|------|------|-----|-------|---|---|
| <b>EDP218</b><br>4 rare                                                                       | DPB1* 696:01Ne / DPB1* 838:01Ne / DPB1* 868:01Ne / DPB1* 1079:01Ne | - | LFQG | -    | -   | -     | - | - |
| <b>EDP874</b><br>1 rare                                                                       | DPB1* 874:01Ne                                                     | - | LFQG | EEFA | AAE | ILEEK | C | - |
| <i>Both sides of this epitype require RARE alleles, review results to confirm assignment.</i> |                                                                    |   |      |      |     |       |   |   |

OR

| EPITYPE                                                                                       | ALLELES                                                            | P GROUP | HVR-A | HVR-B | HVR-C | HVR-D | HVR-E | HVR-F |
|-----------------------------------------------------------------------------------------------|--------------------------------------------------------------------|---------|-------|-------|-------|-------|-------|-------|
| <b>EDP218</b><br>4 rare                                                                       | DPB1* 696:01Ne / DPB1* 838:01Ne / DPB1* 868:01Ne / DPB1* 1079:01Ne | -       | LFQG  | -     | -     | -     | -     | -     |
| <b>EDP254</b><br>1 rare                                                                       | DPB1* 254:01e                                                      | -       | LFQG  | EEFA  | AVE   | ILEEK | M     | GGPM  |
| <i>Both sides of this epitype require RARE alleles, review results to confirm assignment.</i> |                                                                    |         |       |       |       |       |       |       |

OR

| EPITYPE                                                                                       | ALLELES                                                            | P GROUP | HVR-A | HVR-B | HVR-C | HVR-D | HVR-E | HVR-F |
|-----------------------------------------------------------------------------------------------|--------------------------------------------------------------------|---------|-------|-------|-------|-------|-------|-------|
| <b>EDP218</b><br>4 rare                                                                       | DPB1* 696:01Ne / DPB1* 838:01Ne / DPB1* 868:01Ne / DPB1* 1079:01Ne | -       | LFQG  | -     | -     | -     | -     | -     |
| <b>EDP454</b><br>1 rare                                                                       | DPB1* 454:01e                                                      | -       | LFQG  | EEFA  | AAE   | ILEEK | M     | GEPM  |
| <i>Both sides of this epitype require RARE alleles, review results to confirm assignment.</i> |                                                                    |         |       |       |       |       |       |       |

OR

| EPITYPE                                                                                       | ALLELES                                                            | P GROUP | HVR-A | HVR-B | HVR-C | HVR-D | HVR-E | HVR-F |
|-----------------------------------------------------------------------------------------------|--------------------------------------------------------------------|---------|-------|-------|-------|-------|-------|-------|
| <b>EDP218</b><br>4 rare                                                                       | DPB1* 696:01Ne / DPB1* 838:01Ne / DPB1* 868:01Ne / DPB1* 1079:01Ne | -       | LFQG  | -     | -     | -     | -     | -     |
| <b>EDP1046</b><br>1 rare                                                                      | DPB1* 1046:01e                                                     | -       | LFQG  | EEIA  | AAE   | ILEEK | M     | GGPM  |
| <i>Both sides of this epitype require RARE alleles, review results to confirm assignment.</i> |                                                                    |         |       |       |       |       |       |       |

OR

| EPITYPE | ALLELES | P GROUP | HVR-A | HVR-B | HVR-C | HVR-D | HVR-E | HVR-F |
|---------|---------|---------|-------|-------|-------|-------|-------|-------|
|---------|---------|---------|-------|-------|-------|-------|-------|-------|



|                                                                                               |                                                                    |   |      |      |     |       |   |      |
|-----------------------------------------------------------------------------------------------|--------------------------------------------------------------------|---|------|------|-----|-------|---|------|
| <b>EDP218</b><br>4 rare                                                                       | DPB1* 696:01Ne / DPB1* 838:01Ne / DPB1* 868:01Ne / DPB1* 1079:01Ne | - | LFQG | -    | -   | -     | - | -    |
| <b>EDP921</b><br>1 rare                                                                       | DPB1* 921:01e                                                      | - | LFQG | GEFA | AAE | ILEEK | M | GGPM |
| <i>Both sides of this epitype require RARE alleles, review results to confirm assignment.</i> |                                                                    |   |      |      |     |       |   |      |

OR

| EPITYPE                                                                                       | ALLELES                                                            | P GROUP | HVR-A | HVR-B | HVR-C | HVR-D | HVR-E | HVR-F |
|-----------------------------------------------------------------------------------------------|--------------------------------------------------------------------|---------|-------|-------|-------|-------|-------|-------|
| <b>EDP218</b><br>4 rare                                                                       | DPB1* 696:01Ne / DPB1* 838:01Ne / DPB1* 868:01Ne / DPB1* 1079:01Ne | -       | LFQG  | -     | -     | -     | -     | -     |
| <b>EDP871</b><br>1 rare                                                                       | DPB1* 871:01Ne                                                     | -       | LFQG  | EEFA  | AAE   | HPGGE | D     | GRAH  |
| <i>Both sides of this epitype require RARE alleles, review results to confirm assignment.</i> |                                                                    |         |       |       |       |       |       |       |

OR

| EPITYPE                                                                                       | ALLELES                                                            | P GROUP | HVR-A | HVR-B | HVR-C | HVR-D | HVR-E | HVR-F |
|-----------------------------------------------------------------------------------------------|--------------------------------------------------------------------|---------|-------|-------|-------|-------|-------|-------|
| <b>EDP218</b><br>4 rare                                                                       | DPB1* 696:01Ne / DPB1* 838:01Ne / DPB1* 868:01Ne / DPB1* 1079:01Ne | -       | LFQG  | -     | -     | -     | -     | -     |
| <b>EDP399</b><br>1 rare                                                                       | DPB1* 399:01e                                                      | -       | LFQG  | EEFA  | AAE   | IVEEK | M     | GGPM  |
| <i>Both sides of this epitype require RARE alleles, review results to confirm assignment.</i> |                                                                    |         |       |       |       |       |       |       |

OR

| EPITYPE                                                                                       | ALLELES                                                            | P GROUP | HVR-A | HVR-B | HVR-C | HVR-D | HVR-E | HVR-F |
|-----------------------------------------------------------------------------------------------|--------------------------------------------------------------------|---------|-------|-------|-------|-------|-------|-------|
| <b>EDP218</b><br>4 rare                                                                       | DPB1* 696:01Ne / DPB1* 838:01Ne / DPB1* 868:01Ne / DPB1* 1079:01Ne | -       | LFQG  | -     | -     | -     | -     | -     |
| <b>EDP319</b><br>1 rare                                                                       | DPB1* 319:01e                                                      | -       | LFQG  | EEFA  | AAE   | IQEEK | M     | GGPM  |
| <i>Both sides of this epitype require RARE alleles, review results to confirm assignment.</i> |                                                                    |         |       |       |       |       |       |       |

OR

| EPITYPE | ALLELES | P GROUP | HVR-A | HVR-B | HVR-C | HVR-D | HVR-E | HVR-F |
|---------|---------|---------|-------|-------|-------|-------|-------|-------|
|---------|---------|---------|-------|-------|-------|-------|-------|-------|

|                                                                                               |                                                                    |   |      |      |     |       |   |      |
|-----------------------------------------------------------------------------------------------|--------------------------------------------------------------------|---|------|------|-----|-------|---|------|
| <b>EDP179</b><br>1 rare                                                                       | DPB1* 179:01e                                                      | - | LFQG | EEFA | AAE | LLEER | M | GGPM |
| <b>EDP218</b><br>4 rare                                                                       | DPB1* 696:01Ne / DPB1* 838:01Ne / DPB1* 868:01Ne / DPB1* 1079:01Ne | - | LFQG | -    | -   | -     | - | -    |
| <i>Both sides of this epitope require RARE alleles, review results to confirm assignment.</i> |                                                                    |   |      |      |     |       |   |      |

OR

| EPITYPE                                                                                       | ALLELES                                                            | P GROUP | HVR-A | HVR-B | HVR-C | HVR-D | HVR-E | HVR-F |
|-----------------------------------------------------------------------------------------------|--------------------------------------------------------------------|---------|-------|-------|-------|-------|-------|-------|
| <b>EDP218</b><br>4 rare                                                                       | DPB1* 696:01Ne / DPB1* 838:01Ne / DPB1* 868:01Ne / DPB1* 1079:01Ne | -       | LFQG  | -     | -     | -     | -     | -     |
| <b>EDP679</b><br>1 rare                                                                       | DPB1* 679:01e                                                      | -       | PFQG  | EEFA  | AAE   | ILEEK | M     | GGPM  |
| <i>Both sides of this epitope require RARE alleles, review results to confirm assignment.</i> |                                                                    |         |       |       |       |       |       |       |

OR

| EPITYPE                                                                                       | ALLELES                                                            | P GROUP | HVR-A | HVR-B | HVR-C | HVR-D | HVR-E | HVR-F |
|-----------------------------------------------------------------------------------------------|--------------------------------------------------------------------|---------|-------|-------|-------|-------|-------|-------|
| <b>EDP218</b><br>4 rare                                                                       | DPB1* 696:01Ne / DPB1* 838:01Ne / DPB1* 868:01Ne / DPB1* 1079:01Ne | -       | LFQG  | -     | -     | -     | -     | -     |
| <b>EDP592</b><br>1 rare                                                                       | DPB1* 592:01e                                                      | -       | LFQG  | EEFA  | AAE   | ILEEK | M     | GGPR  |
| <i>Both sides of this epitope require RARE alleles, review results to confirm assignment.</i> |                                                                    |         |       |       |       |       |       |       |

OR

| EPITYPE                                                                                       | ALLELES                                                            | P GROUP | HVR-A | HVR-B | HVR-C | HVR-D | HVR-E | HVR-F |
|-----------------------------------------------------------------------------------------------|--------------------------------------------------------------------|---------|-------|-------|-------|-------|-------|-------|
| <b>EDP218</b><br>4 rare                                                                       | DPB1* 696:01Ne / DPB1* 838:01Ne / DPB1* 868:01Ne / DPB1* 1079:01Ne | -       | LFQG  | -     | -     | -     | -     | -     |
| <b>EDP972</b><br>1 rare                                                                       | DPB1* 972:01e                                                      | -       | LFQG  | GEFV  | AAE   | ILEEK | M     | GGPM  |
| <i>Both sides of this epitope require RARE alleles, review results to confirm assignment.</i> |                                                                    |         |       |       |       |       |       |       |

OR

| EPITYPE | ALLELES | P GROUP | HVR-A | HVR-B | HVR-C | HVR-D | HVR-E | HVR-F |
|---------|---------|---------|-------|-------|-------|-------|-------|-------|
|---------|---------|---------|-------|-------|-------|-------|-------|-------|

|                                                                                               |                                                                    |   |      |      |     |       |   |      |
|-----------------------------------------------------------------------------------------------|--------------------------------------------------------------------|---|------|------|-----|-------|---|------|
| <b>EDP218</b><br>4 rare                                                                       | DPB1* 696:01Ne / DPB1* 838:01Ne / DPB1* 868:01Ne / DPB1* 1079:01Ne | - | LFQG | -    | -   | -     | - | -    |
| <b>EDP642</b><br>1 rare                                                                       | DPB1* 642:01e                                                      | - | LFQG | EEFA | DAE | ILEEK | M | GGPM |
| <i>Both sides of this epitype require RARE alleles, review results to confirm assignment.</i> |                                                                    |   |      |      |     |       |   |      |

OR

| EPITYPE                                                                                       | ALLELES                                                            | P GROUP | HVR-A | HVR-B | HVR-C | HVR-D | HVR-E | HVR-F |
|-----------------------------------------------------------------------------------------------|--------------------------------------------------------------------|---------|-------|-------|-------|-------|-------|-------|
| <b>EDP218</b><br>4 rare                                                                       | DPB1* 696:01Ne / DPB1* 838:01Ne / DPB1* 868:01Ne / DPB1* 1079:01Ne | -       | LFQG  | -     | -     | -     | -     | -     |
| <b>EDP1081</b><br>1 rare                                                                      | DPB1* 1081:01e                                                     | -       | LFQG  | EEFA  | AAE   | VLEEK | M     | GGPM  |
| <i>Both sides of this epitype require RARE alleles, review results to confirm assignment.</i> |                                                                    |         |       |       |       |       |       |       |

OR

| EPITYPE                                                                                       | ALLELES                                                            | P GROUP | HVR-A | HVR-B | HVR-C | HVR-D | HVR-E | HVR-F |
|-----------------------------------------------------------------------------------------------|--------------------------------------------------------------------|---------|-------|-------|-------|-------|-------|-------|
| <b>EDP218</b><br>4 rare                                                                       | DPB1* 696:01Ne / DPB1* 838:01Ne / DPB1* 868:01Ne / DPB1* 1079:01Ne | -       | LFQG  | -     | -     | -     | -     | -     |
| <b>EDP1135</b><br>1 rare                                                                      | DPB1* 1135:01Ne                                                    | -       | LFQG  | EEFA  | AAE   | ILGGE | D     | GRAH  |
| <i>Both sides of this epitype require RARE alleles, review results to confirm assignment.</i> |                                                                    |         |       |       |       |       |       |       |

OR

| EPITYPE                                                                                       | ALLELES                                                            | P GROUP | HVR-A | HVR-B | HVR-C | HVR-D | HVR-E | HVR-F |
|-----------------------------------------------------------------------------------------------|--------------------------------------------------------------------|---------|-------|-------|-------|-------|-------|-------|
| <b>EDP218</b><br>4 rare                                                                       | DPB1* 696:01Ne / DPB1* 838:01Ne / DPB1* 868:01Ne / DPB1* 1079:01Ne | -       | LFQG  | -     | -     | -     | -     | -     |
| <b>EDP687</b><br>1 rare                                                                       | DPB1* 687:01e                                                      | -       | LFQL  | EEFA  | AAE   | ILEEK | M     | GGPM  |
| <i>Both sides of this epitype require RARE alleles, review results to confirm assignment.</i> |                                                                    |         |       |       |       |       |       |       |

OR

| EPITYPE | ALLELES | P GROUP | HVR-A | HVR-B | HVR-C | HVR-D | HVR-E | HVR-F |
|---------|---------|---------|-------|-------|-------|-------|-------|-------|
|---------|---------|---------|-------|-------|-------|-------|-------|-------|

|                                                                                               |                                                                    |   |      |      |     |       |   |      |
|-----------------------------------------------------------------------------------------------|--------------------------------------------------------------------|---|------|------|-----|-------|---|------|
| <b>EDP218</b><br>4 rare                                                                       | DPB1* 696:01Ne / DPB1* 838:01Ne / DPB1* 868:01Ne / DPB1* 1079:01Ne | - | LFQG | -    | -   | -     | - | -    |
| <b>EDP427</b><br>1 rare                                                                       | DPB1* 427:01e                                                      | - | LFQG | EEFA | ATE | ILEEK | M | GGPM |
| <i>Both sides of this epitype require RARE alleles, review results to confirm assignment.</i> |                                                                    |   |      |      |     |       |   |      |

OR

| EPITYPE                                                                                       | ALLELES                                                            | P GROUP | HVR-A | HVR-B | HVR-C | HVR-D | HVR-E | HVR-F |
|-----------------------------------------------------------------------------------------------|--------------------------------------------------------------------|---------|-------|-------|-------|-------|-------|-------|
| <b>EDP218</b><br>4 rare                                                                       | DPB1* 696:01Ne / DPB1* 838:01Ne / DPB1* 868:01Ne / DPB1* 1079:01Ne | -       | LFQG  | -     | -     | -     | -     | -     |
| <b>EDP867</b><br>1 rare                                                                       | DPB1* 867:01Ne                                                     | -       | LFQG  | EEFA  | CCG   | HPGGE | D     | GRAH  |
| <i>Both sides of this epitype require RARE alleles, review results to confirm assignment.</i> |                                                                    |         |       |       |       |       |       |       |

OR

| EPITYPE                                                                                       | ALLELES                                                            | P GROUP | HVR-A | HVR-B | HVR-C | HVR-D | HVR-E | HVR-F |
|-----------------------------------------------------------------------------------------------|--------------------------------------------------------------------|---------|-------|-------|-------|-------|-------|-------|
| <b>EDP177</b><br>1 rare                                                                       | DPB1* 177:01e                                                      | -       | LFQG  | EEFA  | AAE   | ILEEK | M     | SGPM  |
| <b>EDP218</b><br>4 rare                                                                       | DPB1* 696:01Ne / DPB1* 838:01Ne / DPB1* 868:01Ne / DPB1* 1079:01Ne | -       | LFQG  | -     | -     | -     | -     | -     |
| <i>Both sides of this epitype require RARE alleles, review results to confirm assignment.</i> |                                                                    |         |       |       |       |       |       |       |

OR

| EPITYPE                                                                                       | ALLELES                                                            | P GROUP | HVR-A | HVR-B | HVR-C | HVR-D | HVR-E | HVR-F |
|-----------------------------------------------------------------------------------------------|--------------------------------------------------------------------|---------|-------|-------|-------|-------|-------|-------|
| <b>EDP218</b><br>4 rare                                                                       | DPB1* 696:01Ne / DPB1* 838:01Ne / DPB1* 868:01Ne / DPB1* 1079:01Ne | -       | LFQG  | -     | -     | -     | -     | -     |
| <b>EDP747</b><br>1 rare                                                                       | DPB1* 747:01e                                                      | -       | VFQG  | EEFA  | AAE   | ILEEK | M     | GGPM  |
| <i>Both sides of this epitype require RARE alleles, review results to confirm assignment.</i> |                                                                    |         |       |       |       |       |       |       |

OR

| EPITYPE | ALLELES | P GROUP | HVR-A | HVR-B | HVR-C | HVR-D | HVR-E | HVR-F |
|---------|---------|---------|-------|-------|-------|-------|-------|-------|
|---------|---------|---------|-------|-------|-------|-------|-------|-------|

|                                                                                               |                                                                    |   |      |      |     |       |   |      |
|-----------------------------------------------------------------------------------------------|--------------------------------------------------------------------|---|------|------|-----|-------|---|------|
| <b>EDP218</b><br>4 rare                                                                       | DPB1* 696:01Ne / DPB1* 838:01Ne / DPB1* 868:01Ne / DPB1* 1079:01Ne | - | LFQG | -    | -   | -     | - | -    |
| <b>EDP1122</b><br>1 rare                                                                      | DPB1* 1122:01e                                                     | - | LFQG | EECA | AAE | ILEEK | M | GGPM |
| <i>Both sides of this epitype require RARE alleles, review results to confirm assignment.</i> |                                                                    |   |      |      |     |       |   |      |

OR

| EPITYPE                                                                                       | ALLELES                                                            | P GROUP | HVR-A | HVR-B | HVR-C | HVR-D | HVR-E | HVR-F |
|-----------------------------------------------------------------------------------------------|--------------------------------------------------------------------|---------|-------|-------|-------|-------|-------|-------|
| <b>EDP218</b><br>4 rare                                                                       | DPB1* 696:01Ne / DPB1* 838:01Ne / DPB1* 868:01Ne / DPB1* 1079:01Ne | -       | LFQG  | -     | -     | -     | -     | -     |
| <b>EDP280</b><br>1 rare                                                                       | DPB1* 280:01e                                                      | -       | LFQG  | EEFA  | AAE   | ILEEK | M     | GAPM  |
| <i>Both sides of this epitype require RARE alleles, review results to confirm assignment.</i> |                                                                    |         |       |       |       |       |       |       |

OR

| EPITYPE                                                                                       | ALLELES                                                            | P GROUP | HVR-A | HVR-B | HVR-C | HVR-D | HVR-E | HVR-F |
|-----------------------------------------------------------------------------------------------|--------------------------------------------------------------------|---------|-------|-------|-------|-------|-------|-------|
| <b>EDP218</b><br>4 rare                                                                       | DPB1* 696:01Ne / DPB1* 838:01Ne / DPB1* 868:01Ne / DPB1* 1079:01Ne | -       | LFQG  | -     | -     | -     | -     | -     |
| <b>EDP230</b><br>1 rare                                                                       | DPB1* 230:01e                                                      | -       | LFQG  | EEFA  | AAE   | ILEEK | M     | GWPM  |
| <i>Both sides of this epitype require RARE alleles, review results to confirm assignment.</i> |                                                                    |         |       |       |       |       |       |       |

OR

| EPITYPE                                                                                       | ALLELES                                                            | P GROUP | HVR-A | HVR-B | HVR-C | HVR-D | HVR-E | HVR-F |
|-----------------------------------------------------------------------------------------------|--------------------------------------------------------------------|---------|-------|-------|-------|-------|-------|-------|
| <b>EDP218</b><br>4 rare                                                                       | DPB1* 696:01Ne / DPB1* 838:01Ne / DPB1* 868:01Ne / DPB1* 1079:01Ne | -       | LFQG  | -     | -     | -     | -     | -     |
| <b>EDP570</b><br>1 rare                                                                       | DPB1* 911:01Ne                                                     | -       | -     | -     | -     | -     | -     | -     |
| <i>Both sides of this epitype require RARE alleles, review results to confirm assignment.</i> |                                                                    |         |       |       |       |       |       |       |

OR

| EPITYPE | ALLELES | P GROUP | HVR-A | HVR-B | HVR-C | HVR-D | HVR-E | HVR-F |
|---------|---------|---------|-------|-------|-------|-------|-------|-------|
|---------|---------|---------|-------|-------|-------|-------|-------|-------|

|                                                                                               |                                                                    |   |      |      |     |       |   |      |
|-----------------------------------------------------------------------------------------------|--------------------------------------------------------------------|---|------|------|-----|-------|---|------|
| <b>EDP218</b><br>4 rare                                                                       | DPB1* 696:01Ne / DPB1* 838:01Ne / DPB1* 868:01Ne / DPB1* 1079:01Ne | - | LFQG | -    | -   | -     | - | -    |
| <b>EDP840</b><br>1 rare                                                                       | DPB1* 840:01e                                                      | - | IFQG | EEFA | AAE | ILEEK | M | GGPM |
| <i>Both sides of this epitype require RARE alleles, review results to confirm assignment.</i> |                                                                    |   |      |      |     |       |   |      |

OR

| EPITYPE                                                                                       | ALLELES                         | P GROUP | HVR-A | HVR-B | HVR-C | HVR-D | HVR-E | HVR-F |
|-----------------------------------------------------------------------------------------------|---------------------------------|---------|-------|-------|-------|-------|-------|-------|
| <b>EDP279</b><br>2 rare                                                                       | DPB1* 279:01:01e, 279:01:02e    | 279:01P | LFQG  | EEFA  | AAE   | ILEEK | M     | GRPM  |
| <b>EDP1016</b><br>2 rare                                                                      | DPB1* 1016:01e / DPB1* 1138:01e | -       | LLQG  | EEFA  | AAE   | ILEEK | M     | GGPM  |
| <i>Both sides of this epitype require RARE alleles, review results to confirm assignment.</i> |                                 |         |       |       |       |       |       |       |

OR

| EPITYPE                                                                                       | ALLELES                                  | P GROUP | HVR-A | HVR-B | HVR-C | HVR-D | HVR-E | HVR-F |
|-----------------------------------------------------------------------------------------------|------------------------------------------|---------|-------|-------|-------|-------|-------|-------|
| <b>EDP227</b><br>3 rare                                                                       | DPB1* 227:01:01e, 227:01:02e, 227:01:03e | 227:01P | LFQG  | EELA  | AAE   | ILEEK | M     | GGPM  |
| <b>EDP399</b><br>1 rare                                                                       | DPB1* 399:01e                            | -       | LFQG  | EEFA  | AAE   | IVEEK | M     | GGPM  |
| <i>Both sides of this epitype require RARE alleles, review results to confirm assignment.</i> |                                          |         |       |       |       |       |       |       |

OR

| EPITYPE                                                                                       | ALLELES                                  | P GROUP | HVR-A | HVR-B | HVR-C | HVR-D | HVR-E | HVR-F |
|-----------------------------------------------------------------------------------------------|------------------------------------------|---------|-------|-------|-------|-------|-------|-------|
| <b>EDP227</b><br>3 rare                                                                       | DPB1* 227:01:01e, 227:01:02e, 227:01:03e | 227:01P | LFQG  | EELA  | AAE   | ILEEK | M     | GGPM  |
| <b>EDP319</b><br>1 rare                                                                       | DPB1* 319:01e                            | -       | LFQG  | EEFA  | AAE   | IQEEK | M     | GGPM  |
| <i>Both sides of this epitype require RARE alleles, review results to confirm assignment.</i> |                                          |         |       |       |       |       |       |       |

OR

| EPITYPE | ALLELES | P GROUP | HVR-A | HVR-B | HVR-C | HVR-D | HVR-E | HVR-F |
|---------|---------|---------|-------|-------|-------|-------|-------|-------|
|---------|---------|---------|-------|-------|-------|-------|-------|-------|

|                                                                                               |                                          |         |      |      |     |       |   |      |
|-----------------------------------------------------------------------------------------------|------------------------------------------|---------|------|------|-----|-------|---|------|
| <b>EDP179</b><br>1 rare                                                                       | DPB1* 179:01e                            | -       | LFQG | EEFA | AAE | LLEER | M | GGPM |
| <b>EDP227</b><br>3 rare                                                                       | DPB1* 227:01:01e, 227:01:02e, 227:01:03e | 227:01P | LFQG | EELA | AAE | ILEEK | M | GGPM |
| <i>Both sides of this epitype require RARE alleles, review results to confirm assignment.</i> |                                          |         |      |      |     |       |   |      |

OR

| EPITYPE                                                                                       | ALLELES                                  | P GROUP | HVR-A | HVR-B | HVR-C | HVR-D | HVR-E | HVR-F |
|-----------------------------------------------------------------------------------------------|------------------------------------------|---------|-------|-------|-------|-------|-------|-------|
| <b>EDP227</b><br>3 rare                                                                       | DPB1* 227:01:01e, 227:01:02e, 227:01:03e | 227:01P | LFQG  | EELA  | AAE   | ILEEK | M     | GGPM  |
| <b>EDP679</b><br>1 rare                                                                       | DPB1* 679:01e                            | -       | PFQG  | EEFA  | AAE   | ILEEK | M     | GGPM  |
| <i>Both sides of this epitype require RARE alleles, review results to confirm assignment.</i> |                                          |         |       |       |       |       |       |       |

OR

| EPITYPE                                                                                       | ALLELES                                  | P GROUP | HVR-A | HVR-B | HVR-C | HVR-D | HVR-E | HVR-F |
|-----------------------------------------------------------------------------------------------|------------------------------------------|---------|-------|-------|-------|-------|-------|-------|
| <b>EDP227</b><br>3 rare                                                                       | DPB1* 227:01:01e, 227:01:02e, 227:01:03e | 227:01P | LFQG  | EELA  | AAE   | ILEEK | M     | GGPM  |
| <b>EDP592</b><br>1 rare                                                                       | DPB1* 592:01e                            | -       | LFQG  | EEFA  | AAE   | ILEEK | M     | GGPR  |
| <i>Both sides of this epitype require RARE alleles, review results to confirm assignment.</i> |                                          |         |       |       |       |       |       |       |

OR

| EPITYPE                                                                                       | ALLELES                                  | P GROUP | HVR-A | HVR-B | HVR-C | HVR-D | HVR-E | HVR-F |
|-----------------------------------------------------------------------------------------------|------------------------------------------|---------|-------|-------|-------|-------|-------|-------|
| <b>EDP227</b><br>3 rare                                                                       | DPB1* 227:01:01e, 227:01:02e, 227:01:03e | 227:01P | LFQG  | EELA  | AAE   | ILEEK | M     | GGPM  |
| <b>EDP972</b><br>1 rare                                                                       | DPB1* 972:01e                            | -       | LFQG  | GEFV  | AAE   | ILEEK | M     | GGPM  |
| <i>Both sides of this epitype require RARE alleles, review results to confirm assignment.</i> |                                          |         |       |       |       |       |       |       |

OR

| EPITYPE | ALLELES | P GROUP | HVR-A | HVR-B | HVR-C | HVR-D | HVR-E | HVR-F |
|---------|---------|---------|-------|-------|-------|-------|-------|-------|
|---------|---------|---------|-------|-------|-------|-------|-------|-------|

|                                                                                               |                                          |         |      |      |     |       |   |      |
|-----------------------------------------------------------------------------------------------|------------------------------------------|---------|------|------|-----|-------|---|------|
| <b>EDP227</b><br>3 rare                                                                       | DPB1* 227:01:01e, 227:01:02e, 227:01:03e | 227:01P | LFQG | EELA | AAE | ILEEK | M | GGPM |
| <b>EDP642</b><br>1 rare                                                                       | DPB1* 642:01e                            | -       | LFQG | EEFA | DAE | ILEEK | M | GGPM |
| <i>Both sides of this epitype require RARE alleles, review results to confirm assignment.</i> |                                          |         |      |      |     |       |   |      |

OR

| EPITYPE                                                                                       | ALLELES                                  | P GROUP | HVR-A | HVR-B | HVR-C | HVR-D | HVR-E | HVR-F |
|-----------------------------------------------------------------------------------------------|------------------------------------------|---------|-------|-------|-------|-------|-------|-------|
| <b>EDP227</b><br>3 rare                                                                       | DPB1* 227:01:01e, 227:01:02e, 227:01:03e | 227:01P | LFQG  | EELA  | AAE   | ILEEK | M     | GGPM  |
| <b>EDP1081</b><br>1 rare                                                                      | DPB1* 1081:01e                           | -       | LFQG  | EEFA  | AAE   | VLEEK | M     | GGPM  |
| <i>Both sides of this epitype require RARE alleles, review results to confirm assignment.</i> |                                          |         |       |       |       |       |       |       |

OR

| EPITYPE                                                                                       | ALLELES                                  | P GROUP | HVR-A | HVR-B | HVR-C | HVR-D | HVR-E | HVR-F |
|-----------------------------------------------------------------------------------------------|------------------------------------------|---------|-------|-------|-------|-------|-------|-------|
| <b>EDP227</b><br>3 rare                                                                       | DPB1* 227:01:01e, 227:01:02e, 227:01:03e | 227:01P | LFQG  | EELA  | AAE   | ILEEK | M     | GGPM  |
| <b>EDP1135</b><br>1 rare                                                                      | DPB1* 1135:01Ne                          | -       | LFQG  | EEFA  | AAE   | ILGGE | D     | GRAH  |
| <i>Both sides of this epitype require RARE alleles, review results to confirm assignment.</i> |                                          |         |       |       |       |       |       |       |

OR

| EPITYPE                                                                                       | ALLELES                                  | P GROUP | HVR-A | HVR-B | HVR-C | HVR-D | HVR-E | HVR-F |
|-----------------------------------------------------------------------------------------------|------------------------------------------|---------|-------|-------|-------|-------|-------|-------|
| <b>EDP227</b><br>3 rare                                                                       | DPB1* 227:01:01e, 227:01:02e, 227:01:03e | 227:01P | LFQG  | EELA  | AAE   | ILEEK | M     | GGPM  |
| <b>EDP687</b><br>1 rare                                                                       | DPB1* 687:01e                            | -       | LFQL  | EEFA  | AAE   | ILEEK | M     | GGPM  |
| <i>Both sides of this epitype require RARE alleles, review results to confirm assignment.</i> |                                          |         |       |       |       |       |       |       |

OR

| EPITYPE | ALLELES | P GROUP | HVR-A | HVR-B | HVR-C | HVR-D | HVR-E | HVR-F |
|---------|---------|---------|-------|-------|-------|-------|-------|-------|
|---------|---------|---------|-------|-------|-------|-------|-------|-------|



|                                                                                               |                                          |         |      |      |     |       |   |      |
|-----------------------------------------------------------------------------------------------|------------------------------------------|---------|------|------|-----|-------|---|------|
| <b>EDP227</b><br>3 rare                                                                       | DPB1* 227:01:01e, 227:01:02e, 227:01:03e | 227:01P | LFQG | EELA | AAE | ILEEK | M | GGPM |
| <b>EDP427</b><br>1 rare                                                                       | DPB1* 427:01e                            | -       | LFQG | EEFA | ATE | ILEEK | M | GGPM |
| <i>Both sides of this epitype require RARE alleles, review results to confirm assignment.</i> |                                          |         |      |      |     |       |   |      |

OR

| EPITYPE                                                                                       | ALLELES                                  | P GROUP | HVR-A | HVR-B | HVR-C | HVR-D | HVR-E | HVR-F |
|-----------------------------------------------------------------------------------------------|------------------------------------------|---------|-------|-------|-------|-------|-------|-------|
| <b>EDP227</b><br>3 rare                                                                       | DPB1* 227:01:01e, 227:01:02e, 227:01:03e | 227:01P | LFQG  | EELA  | AAE   | ILEEK | M     | GGPM  |
| <b>EDP867</b><br>1 rare                                                                       | DPB1* 867:01Ne                           | -       | LFQG  | EEFA  | CCG   | HPGGE | D     | GRAH  |
| <i>Both sides of this epitype require RARE alleles, review results to confirm assignment.</i> |                                          |         |       |       |       |       |       |       |

OR

| EPITYPE                                                                                       | ALLELES                                  | P GROUP | HVR-A | HVR-B | HVR-C | HVR-D | HVR-E | HVR-F |
|-----------------------------------------------------------------------------------------------|------------------------------------------|---------|-------|-------|-------|-------|-------|-------|
| <b>EDP177</b><br>1 rare                                                                       | DPB1* 177:01e                            | -       | LFQG  | EEFA  | AAE   | ILEEK | M     | SGPM  |
| <b>EDP227</b><br>3 rare                                                                       | DPB1* 227:01:01e, 227:01:02e, 227:01:03e | 227:01P | LFQG  | EELA  | AAE   | ILEEK | M     | GGPM  |
| <i>Both sides of this epitype require RARE alleles, review results to confirm assignment.</i> |                                          |         |       |       |       |       |       |       |

OR

| EPITYPE                                                                                       | ALLELES                                  | P GROUP | HVR-A | HVR-B | HVR-C | HVR-D | HVR-E | HVR-F |
|-----------------------------------------------------------------------------------------------|------------------------------------------|---------|-------|-------|-------|-------|-------|-------|
| <b>EDP227</b><br>3 rare                                                                       | DPB1* 227:01:01e, 227:01:02e, 227:01:03e | 227:01P | LFQG  | EELA  | AAE   | ILEEK | M     | GGPM  |
| <b>EDP747</b><br>1 rare                                                                       | DPB1* 747:01e                            | -       | VFQG  | EEFA  | AAE   | ILEEK | M     | GGPM  |
| <i>Both sides of this epitype require RARE alleles, review results to confirm assignment.</i> |                                          |         |       |       |       |       |       |       |

OR

| EPITYPE | ALLELES | P GROUP | HVR-A | HVR-B | HVR-C | HVR-D | HVR-E | HVR-F |
|---------|---------|---------|-------|-------|-------|-------|-------|-------|
|---------|---------|---------|-------|-------|-------|-------|-------|-------|

|                                                                                               |                                          |         |      |      |     |       |   |      |
|-----------------------------------------------------------------------------------------------|------------------------------------------|---------|------|------|-----|-------|---|------|
| <b>EDP227</b><br>3 rare                                                                       | DPB1* 227:01:01e, 227:01:02e, 227:01:03e | 227:01P | LFQG | EELA | AAE | ILEEK | M | GGPM |
| <b>EDP1122</b><br>1 rare                                                                      | DPB1* 1122:01e                           | -       | LFQG | EECA | AAE | ILEEK | M | GGPM |
| <i>Both sides of this epitype require RARE alleles, review results to confirm assignment.</i> |                                          |         |      |      |     |       |   |      |

OR

| EPITYPE                                                                                       | ALLELES                                  | P GROUP | HVR-A | HVR-B | HVR-C | HVR-D | HVR-E | HVR-F |
|-----------------------------------------------------------------------------------------------|------------------------------------------|---------|-------|-------|-------|-------|-------|-------|
| <b>EDP227</b><br>3 rare                                                                       | DPB1* 227:01:01e, 227:01:02e, 227:01:03e | 227:01P | LFQG  | EELA  | AAE   | ILEEK | M     | GGPM  |
| <b>EDP280</b><br>1 rare                                                                       | DPB1* 280:01e                            | -       | LFQG  | EEFA  | AAE   | ILEEK | M     | GAPM  |
| <i>Both sides of this epitype require RARE alleles, review results to confirm assignment.</i> |                                          |         |       |       |       |       |       |       |

OR

| EPITYPE                                                                                       | ALLELES                                  | P GROUP | HVR-A | HVR-B | HVR-C | HVR-D | HVR-E | HVR-F |
|-----------------------------------------------------------------------------------------------|------------------------------------------|---------|-------|-------|-------|-------|-------|-------|
| <b>EDP227</b><br>3 rare                                                                       | DPB1* 227:01:01e, 227:01:02e, 227:01:03e | 227:01P | LFQG  | EELA  | AAE   | ILEEK | M     | GGPM  |
| <b>EDP230</b><br>1 rare                                                                       | DPB1* 230:01e                            | -       | LFQG  | EEFA  | AAE   | ILEEK | M     | GWPM  |
| <i>Both sides of this epitype require RARE alleles, review results to confirm assignment.</i> |                                          |         |       |       |       |       |       |       |

OR

| EPITYPE                                                                                       | ALLELES                                  | P GROUP | HVR-A | HVR-B | HVR-C | HVR-D | HVR-E | HVR-F |
|-----------------------------------------------------------------------------------------------|------------------------------------------|---------|-------|-------|-------|-------|-------|-------|
| <b>EDP227</b><br>3 rare                                                                       | DPB1* 227:01:01e, 227:01:02e, 227:01:03e | 227:01P | LFQG  | EELA  | AAE   | ILEEK | M     | GGPM  |
| <b>EDP570</b><br>1 rare                                                                       | DPB1* 911:01Ne                           | -       | -     | -     | -     | -     | -     | -     |
| <i>Both sides of this epitype require RARE alleles, review results to confirm assignment.</i> |                                          |         |       |       |       |       |       |       |

OR

| EPITYPE | ALLELES | P GROUP | HVR-A | HVR-B | HVR-C | HVR-D | HVR-E | HVR-F |
|---------|---------|---------|-------|-------|-------|-------|-------|-------|
|         |         |         |       |       |       |       |       |       |

|                                                                                               |                                          |         |      |      |     |       |   |      |
|-----------------------------------------------------------------------------------------------|------------------------------------------|---------|------|------|-----|-------|---|------|
| <b>EDP227</b><br>3 rare                                                                       | DPB1* 227:01:01e, 227:01:02e, 227:01:03e | 227:01P | LFQG | EELA | AAE | ILEEK | M | GGPM |
| <b>EDP840</b><br>1 rare                                                                       | DPB1* 840:01e                            | -       | IFQG | EEFA | AAE | ILEEK | M | GGPM |
| <i>Both sides of this epitope require RARE alleles, review results to confirm assignment.</i> |                                          |         |      |      |     |       |   |      |

OR

| EPITYPE                                                                                       | ALLELES                                           | P GROUP | HVR-A | HVR-B | HVR-C | HVR-D | HVR-E | HVR-F |
|-----------------------------------------------------------------------------------------------|---------------------------------------------------|---------|-------|-------|-------|-------|-------|-------|
| <b>EDP216</b><br>3 rare                                                                       | DPB1* 216:01Ne / DPB1* 357:01Ne / DPB1* 1044:01Ne | -       | LFQG  | EEFA  | AAE   | ILEEK | M     | -     |
| <b>EDP828</b><br>1 rare                                                                       | DPB1* 828:01e                                     | -       | LFQG  | DEFA  | AAE   | ILEEK | M     | GGPM  |
| <i>Both sides of this epitope require RARE alleles, review results to confirm assignment.</i> |                                                   |         |       |       |       |       |       |       |

OR

| EPITYPE                                                                                       | ALLELES                                          | P GROUP | HVR-A | HVR-B | HVR-C | HVR-D | HVR-E | HVR-F |
|-----------------------------------------------------------------------------------------------|--------------------------------------------------|---------|-------|-------|-------|-------|-------|-------|
| <b>EDP743</b><br>3 rare                                                                       | DPB1* 743:01Ne / DPB1* 748:01Ne / DPB1* 844:01Ne | -       | LFQG  | EEFA  | AAE   | -     | -     | -     |
| <b>EDP828</b><br>1 rare                                                                       | DPB1* 828:01e                                    | -       | LFQG  | DEFA  | AAE   | ILEEK | M     | GGPM  |
| <i>Both sides of this epitope require RARE alleles, review results to confirm assignment.</i> |                                                  |         |       |       |       |       |       |       |

OR

| EPITYPE                                                                                       | ALLELES                                  | P GROUP | HVR-A | HVR-B | HVR-C | HVR-D | HVR-E | HVR-F |
|-----------------------------------------------------------------------------------------------|------------------------------------------|---------|-------|-------|-------|-------|-------|-------|
| <b>EDP227</b><br>3 rare                                                                       | DPB1* 227:01:01e, 227:01:02e, 227:01:03e | 227:01P | LFQG  | EELA  | AAE   | ILEEK | M     | GGPM  |
| <b>EDP828</b><br>1 rare                                                                       | DPB1* 828:01e                            | -       | LFQG  | DEFA  | AAE   | ILEEK | M     | GGPM  |
| <i>Both sides of this epitope require RARE alleles, review results to confirm assignment.</i> |                                          |         |       |       |       |       |       |       |

OR

| EPITYPE | ALLELES | P GROUP | HVR-A | HVR-B | HVR-C | HVR-D | HVR-E | HVR-F |
|---------|---------|---------|-------|-------|-------|-------|-------|-------|
|---------|---------|---------|-------|-------|-------|-------|-------|-------|

|                                                                                               |                                                   |   |      |      |     |       |   |      |
|-----------------------------------------------------------------------------------------------|---------------------------------------------------|---|------|------|-----|-------|---|------|
| <b>EDP216</b><br>3 rare                                                                       | DPB1* 216:01Ne / DPB1* 357:01Ne / DPB1* 1044:01Ne | - | LFQG | EEFA | AAE | ILEEK | M | -    |
| <b>EDP318</b><br>1 rare                                                                       | DPB1* 318:01e                                     | - | LFQG | EEFT | AAE | ILEEK | M | GGPM |
| <i>Both sides of this epitope require RARE alleles, review results to confirm assignment.</i> |                                                   |   |      |      |     |       |   |      |

OR

| EPITYPE                                                                                       | ALLELES                                          | P GROUP | HVR-A | HVR-B | HVR-C | HVR-D | HVR-E | HVR-F |
|-----------------------------------------------------------------------------------------------|--------------------------------------------------|---------|-------|-------|-------|-------|-------|-------|
| <b>EDP318</b><br>1 rare                                                                       | DPB1* 318:01e                                    | -       | LFQG  | EEFT  | AAE   | ILEEK | M     | GGPM  |
| <b>EDP743</b><br>3 rare                                                                       | DPB1* 743:01Ne / DPB1* 748:01Ne / DPB1* 844:01Ne | -       | LFQG  | EEFA  | AAE   | -     | -     | -     |
| <i>Both sides of this epitope require RARE alleles, review results to confirm assignment.</i> |                                                  |         |       |       |       |       |       |       |

OR

| EPITYPE                                                                                       | ALLELES                                  | P GROUP | HVR-A | HVR-B | HVR-C | HVR-D | HVR-E | HVR-F |
|-----------------------------------------------------------------------------------------------|------------------------------------------|---------|-------|-------|-------|-------|-------|-------|
| <b>EDP227</b><br>3 rare                                                                       | DPB1* 227:01:01e, 227:01:02e, 227:01:03e | 227:01P | LFQG  | EELA  | AAE   | ILEEK | M     | GGPM  |
| <b>EDP318</b><br>1 rare                                                                       | DPB1* 318:01e                            | -       | LFQG  | EEFT  | AAE   | ILEEK | M     | GGPM  |
| <i>Both sides of this epitope require RARE alleles, review results to confirm assignment.</i> |                                          |         |       |       |       |       |       |       |

OR

| EPITYPE                                                                                       | ALLELES                                           | P GROUP | HVR-A | HVR-B | HVR-C | HVR-D | HVR-E | HVR-F |
|-----------------------------------------------------------------------------------------------|---------------------------------------------------|---------|-------|-------|-------|-------|-------|-------|
| <b>EDP178</b><br>1 rare                                                                       | DPB1* 178:01e                                     | -       | LFQG  | EEFA  | AAE   | ILEEK | M     | GGPV  |
| <b>EDP216</b><br>3 rare                                                                       | DPB1* 216:01Ne / DPB1* 357:01Ne / DPB1* 1044:01Ne | -       | LFQG  | EEFA  | AAE   | ILEEK | M     | -     |
| <i>Both sides of this epitope require RARE alleles, review results to confirm assignment.</i> |                                                   |         |       |       |       |       |       |       |

OR

| EPITYPE | ALLELES | P GROUP | HVR-A | HVR-B | HVR-C | HVR-D | HVR-E | HVR-F |
|---------|---------|---------|-------|-------|-------|-------|-------|-------|
|---------|---------|---------|-------|-------|-------|-------|-------|-------|

|                                                                                               |                                                  |   |      |      |     |       |   |      |
|-----------------------------------------------------------------------------------------------|--------------------------------------------------|---|------|------|-----|-------|---|------|
| <b>EDP178</b><br>1 rare                                                                       | DPB1* 178:01e                                    | - | LFQG | EEFA | AAE | ILEEK | M | GGPV |
| <b>EDP743</b><br>3 rare                                                                       | DPB1* 743:01Ne / DPB1* 748:01Ne / DPB1* 844:01Ne | - | LFQG | EEFA | AAE | -     | - | -    |
| <i>Both sides of this epitope require RARE alleles, review results to confirm assignment.</i> |                                                  |   |      |      |     |       |   |      |

OR

| EPITYPE                                                                                       | ALLELES                                  | P GROUP | HVR-A | HVR-B | HVR-C | HVR-D | HVR-E | HVR-F |
|-----------------------------------------------------------------------------------------------|------------------------------------------|---------|-------|-------|-------|-------|-------|-------|
| <b>EDP178</b><br>1 rare                                                                       | DPB1* 178:01e                            | -       | LFQG  | EEFA  | AAE   | ILEEK | M     | GGPV  |
| <b>EDP227</b><br>3 rare                                                                       | DPB1* 227:01:01e, 227:01:02e, 227:01:03e | 227:01P | LFQG  | EELA  | AAE   | ILEEK | M     | GGPM  |
| <i>Both sides of this epitope require RARE alleles, review results to confirm assignment.</i> |                                          |         |       |       |       |       |       |       |

OR

| EPITYPE                                                                                       | ALLELES                                           | P GROUP | HVR-A | HVR-B | HVR-C | HVR-D | HVR-E | HVR-F |
|-----------------------------------------------------------------------------------------------|---------------------------------------------------|---------|-------|-------|-------|-------|-------|-------|
| <b>EDP216</b><br>3 rare                                                                       | DPB1* 216:01Ne / DPB1* 357:01Ne / DPB1* 1044:01Ne | -       | LFQG  | EEFA  | AAE   | ILEEK | M     | -     |
| <b>EDP278</b><br>1 rare                                                                       | DPB1* 278:01e                                     | -       | LFQG  | EEFA  | AAE   | ILEEK | I     | GGPM  |
| <i>Both sides of this epitope require RARE alleles, review results to confirm assignment.</i> |                                                   |         |       |       |       |       |       |       |

OR

| EPITYPE                                                                                       | ALLELES                                          | P GROUP | HVR-A | HVR-B | HVR-C | HVR-D | HVR-E | HVR-F |
|-----------------------------------------------------------------------------------------------|--------------------------------------------------|---------|-------|-------|-------|-------|-------|-------|
| <b>EDP278</b><br>1 rare                                                                       | DPB1* 278:01e                                    | -       | LFQG  | EEFA  | AAE   | ILEEK | I     | GGPM  |
| <b>EDP743</b><br>3 rare                                                                       | DPB1* 743:01Ne / DPB1* 748:01Ne / DPB1* 844:01Ne | -       | LFQG  | EEFA  | AAE   | -     | -     | -     |
| <i>Both sides of this epitope require RARE alleles, review results to confirm assignment.</i> |                                                  |         |       |       |       |       |       |       |

OR

| EPITYPE | ALLELES | P GROUP | HVR-A | HVR-B | HVR-C | HVR-D | HVR-E | HVR-F |
|---------|---------|---------|-------|-------|-------|-------|-------|-------|
|---------|---------|---------|-------|-------|-------|-------|-------|-------|

|                                                                                               |                                          |         |      |      |     |       |   |      |
|-----------------------------------------------------------------------------------------------|------------------------------------------|---------|------|------|-----|-------|---|------|
| <b>EDP227</b><br>3 rare                                                                       | DPB1* 227:01:01e, 227:01:02e, 227:01:03e | 227:01P | LFQG | EELA | AAE | ILEEK | M | GGPM |
| <b>EDP278</b><br>1 rare                                                                       | DPB1* 278:01e                            | -       | LFQG | EEFA | AAE | ILEEK | I | GGPM |
| <i>Both sides of this epitope require RARE alleles, review results to confirm assignment.</i> |                                          |         |      |      |     |       |   |      |

OR

| EPITYPE                                                                                       | ALLELES                                           | P GROUP | HVR-A | HVR-B | HVR-C | HVR-D | HVR-E | HVR-F |
|-----------------------------------------------------------------------------------------------|---------------------------------------------------|---------|-------|-------|-------|-------|-------|-------|
| <b>EDP216</b><br>3 rare                                                                       | DPB1* 216:01Ne / DPB1* 357:01Ne / DPB1* 1044:01Ne | -       | LFQG  | EEFA  | AAE   | ILEEK | M     | -     |
| <b>EDP875</b><br>1 rare                                                                       | DPB1* 875:01Ne                                    | -       | FSRD  | RSSR  | -     | -     | -     | -     |
| <i>Both sides of this epitope require RARE alleles, review results to confirm assignment.</i> |                                                   |         |       |       |       |       |       |       |

OR

| EPITYPE                                                                                       | ALLELES                                          | P GROUP | HVR-A | HVR-B | HVR-C | HVR-D | HVR-E | HVR-F |
|-----------------------------------------------------------------------------------------------|--------------------------------------------------|---------|-------|-------|-------|-------|-------|-------|
| <b>EDP743</b><br>3 rare                                                                       | DPB1* 743:01Ne / DPB1* 748:01Ne / DPB1* 844:01Ne | -       | LFQG  | EEFA  | AAE   | -     | -     | -     |
| <b>EDP875</b><br>1 rare                                                                       | DPB1* 875:01Ne                                   | -       | FSRD  | RSSR  | -     | -     | -     | -     |
| <i>Both sides of this epitope require RARE alleles, review results to confirm assignment.</i> |                                                  |         |       |       |       |       |       |       |

OR

| EPITYPE                                                                                       | ALLELES                                  | P GROUP | HVR-A | HVR-B | HVR-C | HVR-D | HVR-E | HVR-F |
|-----------------------------------------------------------------------------------------------|------------------------------------------|---------|-------|-------|-------|-------|-------|-------|
| <b>EDP227</b><br>3 rare                                                                       | DPB1* 227:01:01e, 227:01:02e, 227:01:03e | 227:01P | LFQG  | EELA  | AAE   | ILEEK | M     | GGPM  |
| <b>EDP875</b><br>1 rare                                                                       | DPB1* 875:01Ne                           | -       | FSRD  | RSSR  | -     | -     | -     | -     |
| <i>Both sides of this epitope require RARE alleles, review results to confirm assignment.</i> |                                          |         |       |       |       |       |       |       |

OR

| EPITYPE | ALLELES | P GROUP | HVR-A | HVR-B | HVR-C | HVR-D | HVR-E | HVR-F |
|---------|---------|---------|-------|-------|-------|-------|-------|-------|
|---------|---------|---------|-------|-------|-------|-------|-------|-------|

|                                                                                               |                                                   |   |      |      |     |       |   |      |
|-----------------------------------------------------------------------------------------------|---------------------------------------------------|---|------|------|-----|-------|---|------|
| <b>EDP216</b><br>3 rare                                                                       | DPB1* 216:01Ne / DPB1* 357:01Ne / DPB1* 1044:01Ne | - | LFQG | EEFA | AAE | ILEEK | M | -    |
| <b>EDP375</b><br>1 rare                                                                       | DPB1* 375:01e                                     | - | LFQG | QEFA | AAE | ILEEK | M | GGPM |
| <i>Both sides of this epitope require RARE alleles, review results to confirm assignment.</i> |                                                   |   |      |      |     |       |   |      |

OR

| EPITYPE                                                                                       | ALLELES                                          | P GROUP | HVR-A | HVR-B | HVR-C | HVR-D | HVR-E | HVR-F |
|-----------------------------------------------------------------------------------------------|--------------------------------------------------|---------|-------|-------|-------|-------|-------|-------|
| <b>EDP375</b><br>1 rare                                                                       | DPB1* 375:01e                                    | -       | LFQG  | QEFA  | AAE   | ILEEK | M     | GGPM  |
| <b>EDP743</b><br>3 rare                                                                       | DPB1* 743:01Ne / DPB1* 748:01Ne / DPB1* 844:01Ne | -       | LFQG  | EEFA  | AAE   | -     | -     | -     |
| <i>Both sides of this epitope require RARE alleles, review results to confirm assignment.</i> |                                                  |         |       |       |       |       |       |       |

OR

| EPITYPE                                                                                       | ALLELES                                  | P GROUP | HVR-A | HVR-B | HVR-C | HVR-D | HVR-E | HVR-F |
|-----------------------------------------------------------------------------------------------|------------------------------------------|---------|-------|-------|-------|-------|-------|-------|
| <b>EDP227</b><br>3 rare                                                                       | DPB1* 227:01:01e, 227:01:02e, 227:01:03e | 227:01P | LFQG  | EELA  | AAE   | ILEEK | M     | GGPM  |
| <b>EDP375</b><br>1 rare                                                                       | DPB1* 375:01e                            | -       | LFQG  | QEFA  | AAE   | ILEEK | M     | GGPM  |
| <i>Both sides of this epitope require RARE alleles, review results to confirm assignment.</i> |                                          |         |       |       |       |       |       |       |

OR

| EPITYPE                                                                                       | ALLELES                                           | P GROUP | HVR-A | HVR-B | HVR-C | HVR-D | HVR-E | HVR-F |
|-----------------------------------------------------------------------------------------------|---------------------------------------------------|---------|-------|-------|-------|-------|-------|-------|
| <b>EDP216</b><br>3 rare                                                                       | DPB1* 216:01Ne / DPB1* 357:01Ne / DPB1* 1044:01Ne | -       | LFQG  | EEFA  | AAE   | ILEEK | M     | -     |
| <b>EDP686</b><br>1 rare                                                                       | DPB1* 686:01e                                     | -       | LFQG  | EGFA  | AAE   | ILEEK | M     | GGPM  |
| <i>Both sides of this epitope require RARE alleles, review results to confirm assignment.</i> |                                                   |         |       |       |       |       |       |       |

OR

| EPITYPE | ALLELES | P GROUP | HVR-A | HVR-B | HVR-C | HVR-D | HVR-E | HVR-F |
|---------|---------|---------|-------|-------|-------|-------|-------|-------|
|---------|---------|---------|-------|-------|-------|-------|-------|-------|

|                                                                                               |                                                  |   |      |      |     |       |   |      |
|-----------------------------------------------------------------------------------------------|--------------------------------------------------|---|------|------|-----|-------|---|------|
| <b>EDP686</b><br>1 rare                                                                       | DPB1* 686:01e                                    | - | LFQG | EGFA | AAE | ILEEK | M | GGPM |
| <b>EDP743</b><br>3 rare                                                                       | DPB1* 743:01Ne / DPB1* 748:01Ne / DPB1* 844:01Ne | - | LFQG | EEFA | AAE | -     | - | -    |
| <i>Both sides of this epitope require RARE alleles, review results to confirm assignment.</i> |                                                  |   |      |      |     |       |   |      |

OR

| EPITYPE                                                                                       | ALLELES                                  | P GROUP | HVR-A | HVR-B | HVR-C | HVR-D | HVR-E | HVR-F |
|-----------------------------------------------------------------------------------------------|------------------------------------------|---------|-------|-------|-------|-------|-------|-------|
| <b>EDP227</b><br>3 rare                                                                       | DPB1* 227:01:01e, 227:01:02e, 227:01:03e | 227:01P | LFQG  | EELA  | AAE   | ILEEK | M     | GGPM  |
| <b>EDP686</b><br>1 rare                                                                       | DPB1* 686:01e                            | -       | LFQG  | EGFA  | AAE   | ILEEK | M     | GGPM  |
| <i>Both sides of this epitope require RARE alleles, review results to confirm assignment.</i> |                                          |         |       |       |       |       |       |       |

OR

| EPITYPE                                                                                       | ALLELES                                           | P GROUP | HVR-A | HVR-B | HVR-C | HVR-D | HVR-E | HVR-F |
|-----------------------------------------------------------------------------------------------|---------------------------------------------------|---------|-------|-------|-------|-------|-------|-------|
| <b>EDP176</b><br>1 rare                                                                       | DPB1* 176:01e                                     | -       | LFQG  | EEFA  | AAE   | ILKEK | M     | GGPM  |
| <b>EDP216</b><br>3 rare                                                                       | DPB1* 216:01Ne / DPB1* 357:01Ne / DPB1* 1044:01Ne | -       | LFQG  | EEFA  | AAE   | ILEEK | M     | -     |
| <i>Both sides of this epitope require RARE alleles, review results to confirm assignment.</i> |                                                   |         |       |       |       |       |       |       |

OR

| EPITYPE                                                                                       | ALLELES                                           | P GROUP | HVR-A | HVR-B | HVR-C | HVR-D | HVR-E | HVR-F |
|-----------------------------------------------------------------------------------------------|---------------------------------------------------|---------|-------|-------|-------|-------|-------|-------|
| <b>EDP216</b><br>3 rare                                                                       | DPB1* 216:01Ne / DPB1* 357:01Ne / DPB1* 1044:01Ne | -       | LFQG  | EEFA  | AAE   | ILEEK | M     | -     |
| <b>EDP456</b><br>1 rare                                                                       | DPB1* 456:01e                                     | -       | LFQG  | EEFA  | AAE   | ILEVK | M     | GGPM  |
| <i>Both sides of this epitope require RARE alleles, review results to confirm assignment.</i> |                                                   |         |       |       |       |       |       |       |

OR

| EPITYPE | ALLELES | P GROUP | HVR-A | HVR-B | HVR-C | HVR-D | HVR-E | HVR-F |
|---------|---------|---------|-------|-------|-------|-------|-------|-------|
|---------|---------|---------|-------|-------|-------|-------|-------|-------|



|                                                                                               |                                                   |   |      |      |     |       |   |      |
|-----------------------------------------------------------------------------------------------|---------------------------------------------------|---|------|------|-----|-------|---|------|
| <b>EDP216</b><br>3 rare                                                                       | DPB1* 216:01Ne / DPB1* 357:01Ne / DPB1* 1044:01Ne | - | LFQG | EEFA | AAE | ILEEK | M | -    |
| <b>EDP1097</b><br>1 rare                                                                      | DPB1* 1097:01e                                    | - | LFLG | EEFA | AAE | ILEEK | M | GGPM |
| <i>Both sides of this epitope require RARE alleles, review results to confirm assignment.</i> |                                                   |   |      |      |     |       |   |      |

OR

| EPITYPE                                                                                       | ALLELES                                           | P GROUP | HVR-A | HVR-B | HVR-C | HVR-D | HVR-E | HVR-F |
|-----------------------------------------------------------------------------------------------|---------------------------------------------------|---------|-------|-------|-------|-------|-------|-------|
| <b>EDP216</b><br>3 rare                                                                       | DPB1* 216:01Ne / DPB1* 357:01Ne / DPB1* 1044:01Ne | -       | LFQG  | EEFA  | AAE   | ILEEK | M     | -     |
| <b>EDP303</b><br>1 rare                                                                       | DPB1* 303:01e                                     | -       | LFQG  | EEFA  | AAE   | ILEER | M     | GGPM  |
| <i>Both sides of this epitope require RARE alleles, review results to confirm assignment.</i> |                                                   |         |       |       |       |       |       |       |

OR

| EPITYPE                                                                                       | ALLELES                                           | P GROUP | HVR-A | HVR-B | HVR-C | HVR-D | HVR-E | HVR-F |
|-----------------------------------------------------------------------------------------------|---------------------------------------------------|---------|-------|-------|-------|-------|-------|-------|
| <b>EDP216</b><br>3 rare                                                                       | DPB1* 216:01Ne / DPB1* 357:01Ne / DPB1* 1044:01Ne | -       | LFQG  | EEFA  | AAE   | ILEEK | M     | -     |
| <b>EDP753</b><br>1 rare                                                                       | DPB1* 753:01e                                     | -       | FFQG  | EEFA  | AAE   | ILEEK | M     | GGPM  |
| <i>Both sides of this epitope require RARE alleles, review results to confirm assignment.</i> |                                                   |         |       |       |       |       |       |       |

OR

| EPITYPE                                                                                       | ALLELES                                           | P GROUP | HVR-A | HVR-B | HVR-C | HVR-D | HVR-E | HVR-F |
|-----------------------------------------------------------------------------------------------|---------------------------------------------------|---------|-------|-------|-------|-------|-------|-------|
| <b>EDP216</b><br>3 rare                                                                       | DPB1* 216:01Ne / DPB1* 357:01Ne / DPB1* 1044:01Ne | -       | LFQG  | EEFA  | AAE   | ILEEK | M     | -     |
| <b>EDP934</b><br>1 rare                                                                       | DPB1* 934:01Qe                                    | -       | LFQG  | EFA   | AAE   | ILEEK | M     | GGPM  |
| <i>Both sides of this epitope require RARE alleles, review results to confirm assignment.</i> |                                                   |         |       |       |       |       |       |       |

OR

| EPITYPE | ALLELES | P GROUP | HVR-A | HVR-B | HVR-C | HVR-D | HVR-E | HVR-F |
|---------|---------|---------|-------|-------|-------|-------|-------|-------|
|---------|---------|---------|-------|-------|-------|-------|-------|-------|

|                                                                                               |                                                   |   |      |      |     |       |   |   |
|-----------------------------------------------------------------------------------------------|---------------------------------------------------|---|------|------|-----|-------|---|---|
| <b>EDP216</b><br>3 rare                                                                       | DPB1* 216:01Ne / DPB1* 357:01Ne / DPB1* 1044:01Ne | - | LFQG | EEFA | AAE | ILEEK | M | - |
| <b>EDP874</b><br>1 rare                                                                       | DPB1* 874:01Ne                                    | - | LFQG | EEFA | AAE | ILEEK | C | - |
| <i>Both sides of this epitope require RARE alleles, review results to confirm assignment.</i> |                                                   |   |      |      |     |       |   |   |

OR

| EPITYPE                                                                                       | ALLELES                                           | P GROUP | HVR-A | HVR-B | HVR-C | HVR-D | HVR-E | HVR-F |
|-----------------------------------------------------------------------------------------------|---------------------------------------------------|---------|-------|-------|-------|-------|-------|-------|
| <b>EDP216</b><br>3 rare                                                                       | DPB1* 216:01Ne / DPB1* 357:01Ne / DPB1* 1044:01Ne | -       | LFQG  | EEFA  | AAE   | ILEEK | M     | -     |
| <b>EDP254</b><br>1 rare                                                                       | DPB1* 254:01e                                     | -       | LFQG  | EEFA  | AVE   | ILEEK | M     | GGPM  |
| <i>Both sides of this epitope require RARE alleles, review results to confirm assignment.</i> |                                                   |         |       |       |       |       |       |       |

OR

| EPITYPE                                                                                       | ALLELES                                           | P GROUP | HVR-A | HVR-B | HVR-C | HVR-D | HVR-E | HVR-F |
|-----------------------------------------------------------------------------------------------|---------------------------------------------------|---------|-------|-------|-------|-------|-------|-------|
| <b>EDP216</b><br>3 rare                                                                       | DPB1* 216:01Ne / DPB1* 357:01Ne / DPB1* 1044:01Ne | -       | LFQG  | EEFA  | AAE   | ILEEK | M     | -     |
| <b>EDP454</b><br>1 rare                                                                       | DPB1* 454:01e                                     | -       | LFQG  | EEFA  | AAE   | ILEEK | M     | GEPM  |
| <i>Both sides of this epitope require RARE alleles, review results to confirm assignment.</i> |                                                   |         |       |       |       |       |       |       |

OR

| EPITYPE                                                                                       | ALLELES                                           | P GROUP | HVR-A | HVR-B | HVR-C | HVR-D | HVR-E | HVR-F |
|-----------------------------------------------------------------------------------------------|---------------------------------------------------|---------|-------|-------|-------|-------|-------|-------|
| <b>EDP216</b><br>3 rare                                                                       | DPB1* 216:01Ne / DPB1* 357:01Ne / DPB1* 1044:01Ne | -       | LFQG  | EEFA  | AAE   | ILEEK | M     | -     |
| <b>EDP1046</b><br>1 rare                                                                      | DPB1* 1046:01e                                    | -       | LFQG  | EEIA  | AAE   | ILEEK | M     | GGPM  |
| <i>Both sides of this epitope require RARE alleles, review results to confirm assignment.</i> |                                                   |         |       |       |       |       |       |       |

OR

| EPITYPE | ALLELES | P GROUP | HVR-A | HVR-B | HVR-C | HVR-D | HVR-E | HVR-F |
|---------|---------|---------|-------|-------|-------|-------|-------|-------|
|---------|---------|---------|-------|-------|-------|-------|-------|-------|

|                                                                                               |                                                   |   |      |      |     |       |   |      |
|-----------------------------------------------------------------------------------------------|---------------------------------------------------|---|------|------|-----|-------|---|------|
| <b>EDP216</b><br>3 rare                                                                       | DPB1* 216:01Ne / DPB1* 357:01Ne / DPB1* 1044:01Ne | - | LFQG | EEFA | AAE | ILEEK | M | -    |
| <b>EDP921</b><br>1 rare                                                                       | DPB1* 921:01e                                     | - | LFQG | GEFA | AAE | ILEEK | M | GGPM |
| <i>Both sides of this epitope require RARE alleles, review results to confirm assignment.</i> |                                                   |   |      |      |     |       |   |      |

OR

| EPITYPE                                                                                       | ALLELES                                           | P GROUP | HVR-A | HVR-B | HVR-C | HVR-D | HVR-E | HVR-F |
|-----------------------------------------------------------------------------------------------|---------------------------------------------------|---------|-------|-------|-------|-------|-------|-------|
| <b>EDP216</b><br>3 rare                                                                       | DPB1* 216:01Ne / DPB1* 357:01Ne / DPB1* 1044:01Ne | -       | LFQG  | EEFA  | AAE   | ILEEK | M     | -     |
| <b>EDP871</b><br>1 rare                                                                       | DPB1* 871:01Ne                                    | -       | LFQG  | EEFA  | AAE   | HPGGE | D     | GRAH  |
| <i>Both sides of this epitope require RARE alleles, review results to confirm assignment.</i> |                                                   |         |       |       |       |       |       |       |

OR

| EPITYPE                                                                                       | ALLELES                                           | P GROUP | HVR-A | HVR-B | HVR-C | HVR-D | HVR-E | HVR-F |
|-----------------------------------------------------------------------------------------------|---------------------------------------------------|---------|-------|-------|-------|-------|-------|-------|
| <b>EDP216</b><br>3 rare                                                                       | DPB1* 216:01Ne / DPB1* 357:01Ne / DPB1* 1044:01Ne | -       | LFQG  | EEFA  | AAE   | ILEEK | M     | -     |
| <b>EDP399</b><br>1 rare                                                                       | DPB1* 399:01e                                     | -       | LFQG  | EEFA  | AAE   | IVEEK | M     | GGPM  |
| <i>Both sides of this epitope require RARE alleles, review results to confirm assignment.</i> |                                                   |         |       |       |       |       |       |       |

OR

| EPITYPE                                                                                       | ALLELES                                           | P GROUP | HVR-A | HVR-B | HVR-C | HVR-D | HVR-E | HVR-F |
|-----------------------------------------------------------------------------------------------|---------------------------------------------------|---------|-------|-------|-------|-------|-------|-------|
| <b>EDP216</b><br>3 rare                                                                       | DPB1* 216:01Ne / DPB1* 357:01Ne / DPB1* 1044:01Ne | -       | LFQG  | EEFA  | AAE   | ILEEK | M     | -     |
| <b>EDP319</b><br>1 rare                                                                       | DPB1* 319:01e                                     | -       | LFQG  | EEFA  | AAE   | IQEEK | M     | GGPM  |
| <i>Both sides of this epitope require RARE alleles, review results to confirm assignment.</i> |                                                   |         |       |       |       |       |       |       |

OR

| EPITYPE | ALLELES | P GROUP | HVR-A | HVR-B | HVR-C | HVR-D | HVR-E | HVR-F |
|---------|---------|---------|-------|-------|-------|-------|-------|-------|
|---------|---------|---------|-------|-------|-------|-------|-------|-------|

|                                                                                               |                                                   |   |      |      |     |       |   |      |
|-----------------------------------------------------------------------------------------------|---------------------------------------------------|---|------|------|-----|-------|---|------|
| <b>EDP179</b><br>1 rare                                                                       | DPB1* 179:01e                                     | - | LFQG | EEFA | AAE | LLEER | M | GGPM |
| <b>EDP216</b><br>3 rare                                                                       | DPB1* 216:01Ne / DPB1* 357:01Ne / DPB1* 1044:01Ne | - | LFQG | EEFA | AAE | ILEEK | M | -    |
| <i>Both sides of this epitype require RARE alleles, review results to confirm assignment.</i> |                                                   |   |      |      |     |       |   |      |

OR

| EPITYPE                                                                                       | ALLELES                                           | P GROUP | HVR-A | HVR-B | HVR-C | HVR-D | HVR-E | HVR-F |
|-----------------------------------------------------------------------------------------------|---------------------------------------------------|---------|-------|-------|-------|-------|-------|-------|
| <b>EDP216</b><br>3 rare                                                                       | DPB1* 216:01Ne / DPB1* 357:01Ne / DPB1* 1044:01Ne | -       | LFQG  | EEFA  | AAE   | ILEEK | M     | -     |
| <b>EDP679</b><br>1 rare                                                                       | DPB1* 679:01e                                     | -       | PFQG  | EEFA  | AAE   | ILEEK | M     | GGPM  |
| <i>Both sides of this epitype require RARE alleles, review results to confirm assignment.</i> |                                                   |         |       |       |       |       |       |       |

OR

| EPITYPE                                                                                       | ALLELES                                           | P GROUP | HVR-A | HVR-B | HVR-C | HVR-D | HVR-E | HVR-F |
|-----------------------------------------------------------------------------------------------|---------------------------------------------------|---------|-------|-------|-------|-------|-------|-------|
| <b>EDP216</b><br>3 rare                                                                       | DPB1* 216:01Ne / DPB1* 357:01Ne / DPB1* 1044:01Ne | -       | LFQG  | EEFA  | AAE   | ILEEK | M     | -     |
| <b>EDP592</b><br>1 rare                                                                       | DPB1* 592:01e                                     | -       | LFQG  | EEFA  | AAE   | ILEEK | M     | GGPR  |
| <i>Both sides of this epitype require RARE alleles, review results to confirm assignment.</i> |                                                   |         |       |       |       |       |       |       |

OR

| EPITYPE                                                                                       | ALLELES                                           | P GROUP | HVR-A | HVR-B | HVR-C | HVR-D | HVR-E | HVR-F |
|-----------------------------------------------------------------------------------------------|---------------------------------------------------|---------|-------|-------|-------|-------|-------|-------|
| <b>EDP216</b><br>3 rare                                                                       | DPB1* 216:01Ne / DPB1* 357:01Ne / DPB1* 1044:01Ne | -       | LFQG  | EEFA  | AAE   | ILEEK | M     | -     |
| <b>EDP972</b><br>1 rare                                                                       | DPB1* 972:01e                                     | -       | LFQG  | GEFV  | AAE   | ILEEK | M     | GGPM  |
| <i>Both sides of this epitype require RARE alleles, review results to confirm assignment.</i> |                                                   |         |       |       |       |       |       |       |

OR

| EPITYPE | ALLELES | P GROUP | HVR-A | HVR-B | HVR-C | HVR-D | HVR-E | HVR-F |
|---------|---------|---------|-------|-------|-------|-------|-------|-------|
|---------|---------|---------|-------|-------|-------|-------|-------|-------|

|                                                                                               |                                                   |   |      |      |     |       |   |      |
|-----------------------------------------------------------------------------------------------|---------------------------------------------------|---|------|------|-----|-------|---|------|
| <b>EDP216</b><br>3 rare                                                                       | DPB1* 216:01Ne / DPB1* 357:01Ne / DPB1* 1044:01Ne | - | LFQG | EEFA | AAE | ILEEK | M | -    |
| <b>EDP642</b><br>1 rare                                                                       | DPB1* 642:01e                                     | - | LFQG | EEFA | DAE | ILEEK | M | GGPM |
| <i>Both sides of this epitope require RARE alleles, review results to confirm assignment.</i> |                                                   |   |      |      |     |       |   |      |

OR

| EPITYPE                                                                                       | ALLELES                                           | P GROUP | HVR-A | HVR-B | HVR-C | HVR-D | HVR-E | HVR-F |
|-----------------------------------------------------------------------------------------------|---------------------------------------------------|---------|-------|-------|-------|-------|-------|-------|
| <b>EDP216</b><br>3 rare                                                                       | DPB1* 216:01Ne / DPB1* 357:01Ne / DPB1* 1044:01Ne | -       | LFQG  | EEFA  | AAE   | ILEEK | M     | -     |
| <b>EDP1081</b><br>1 rare                                                                      | DPB1* 1081:01e                                    | -       | LFQG  | EEFA  | AAE   | VLEEK | M     | GGPM  |
| <i>Both sides of this epitope require RARE alleles, review results to confirm assignment.</i> |                                                   |         |       |       |       |       |       |       |

OR

| EPITYPE                                                                                       | ALLELES                                           | P GROUP | HVR-A | HVR-B | HVR-C | HVR-D | HVR-E | HVR-F |
|-----------------------------------------------------------------------------------------------|---------------------------------------------------|---------|-------|-------|-------|-------|-------|-------|
| <b>EDP216</b><br>3 rare                                                                       | DPB1* 216:01Ne / DPB1* 357:01Ne / DPB1* 1044:01Ne | -       | LFQG  | EEFA  | AAE   | ILEEK | M     | -     |
| <b>EDP1135</b><br>1 rare                                                                      | DPB1* 1135:01Ne                                   | -       | LFQG  | EEFA  | AAE   | ILGGE | D     | GRAH  |
| <i>Both sides of this epitope require RARE alleles, review results to confirm assignment.</i> |                                                   |         |       |       |       |       |       |       |

OR

| EPITYPE                                                                                       | ALLELES                                           | P GROUP | HVR-A | HVR-B | HVR-C | HVR-D | HVR-E | HVR-F |
|-----------------------------------------------------------------------------------------------|---------------------------------------------------|---------|-------|-------|-------|-------|-------|-------|
| <b>EDP216</b><br>3 rare                                                                       | DPB1* 216:01Ne / DPB1* 357:01Ne / DPB1* 1044:01Ne | -       | LFQG  | EEFA  | AAE   | ILEEK | M     | -     |
| <b>EDP687</b><br>1 rare                                                                       | DPB1* 687:01e                                     | -       | LFQL  | EEFA  | AAE   | ILEEK | M     | GGPM  |
| <i>Both sides of this epitope require RARE alleles, review results to confirm assignment.</i> |                                                   |         |       |       |       |       |       |       |

OR

| EPITYPE | ALLELES | P GROUP | HVR-A | HVR-B | HVR-C | HVR-D | HVR-E | HVR-F |
|---------|---------|---------|-------|-------|-------|-------|-------|-------|
|---------|---------|---------|-------|-------|-------|-------|-------|-------|

|                                                                                               |                                                   |   |      |      |     |       |   |      |
|-----------------------------------------------------------------------------------------------|---------------------------------------------------|---|------|------|-----|-------|---|------|
| <b>EDP216</b><br>3 rare                                                                       | DPB1* 216:01Ne / DPB1* 357:01Ne / DPB1* 1044:01Ne | - | LFQG | EEFA | AAE | ILEEK | M | -    |
| <b>EDP427</b><br>1 rare                                                                       | DPB1* 427:01e                                     | - | LFQG | EEFA | ATE | ILEEK | M | GGPM |
| <i>Both sides of this epitope require RARE alleles, review results to confirm assignment.</i> |                                                   |   |      |      |     |       |   |      |

OR

| EPITYPE                                                                                       | ALLELES                                           | P GROUP | HVR-A | HVR-B | HVR-C | HVR-D | HVR-E | HVR-F |
|-----------------------------------------------------------------------------------------------|---------------------------------------------------|---------|-------|-------|-------|-------|-------|-------|
| <b>EDP216</b><br>3 rare                                                                       | DPB1* 216:01Ne / DPB1* 357:01Ne / DPB1* 1044:01Ne | -       | LFQG  | EEFA  | AAE   | ILEEK | M     | -     |
| <b>EDP867</b><br>1 rare                                                                       | DPB1* 867:01Ne                                    | -       | LFQG  | EEFA  | CCG   | HPGGE | D     | GRAH  |
| <i>Both sides of this epitope require RARE alleles, review results to confirm assignment.</i> |                                                   |         |       |       |       |       |       |       |

OR

| EPITYPE                                                                                       | ALLELES                                           | P GROUP | HVR-A | HVR-B | HVR-C | HVR-D | HVR-E | HVR-F |
|-----------------------------------------------------------------------------------------------|---------------------------------------------------|---------|-------|-------|-------|-------|-------|-------|
| <b>EDP177</b><br>1 rare                                                                       | DPB1* 177:01e                                     | -       | LFQG  | EEFA  | AAE   | ILEEK | M     | SGPM  |
| <b>EDP216</b><br>3 rare                                                                       | DPB1* 216:01Ne / DPB1* 357:01Ne / DPB1* 1044:01Ne | -       | LFQG  | EEFA  | AAE   | ILEEK | M     | -     |
| <i>Both sides of this epitope require RARE alleles, review results to confirm assignment.</i> |                                                   |         |       |       |       |       |       |       |

OR

| EPITYPE                                                                                       | ALLELES                                           | P GROUP | HVR-A | HVR-B | HVR-C | HVR-D | HVR-E | HVR-F |
|-----------------------------------------------------------------------------------------------|---------------------------------------------------|---------|-------|-------|-------|-------|-------|-------|
| <b>EDP216</b><br>3 rare                                                                       | DPB1* 216:01Ne / DPB1* 357:01Ne / DPB1* 1044:01Ne | -       | LFQG  | EEFA  | AAE   | ILEEK | M     | -     |
| <b>EDP747</b><br>1 rare                                                                       | DPB1* 747:01e                                     | -       | VFQG  | EEFA  | AAE   | ILEEK | M     | GGPM  |
| <i>Both sides of this epitope require RARE alleles, review results to confirm assignment.</i> |                                                   |         |       |       |       |       |       |       |

OR

| EPITYPE | ALLELES | P GROUP | HVR-A | HVR-B | HVR-C | HVR-D | HVR-E | HVR-F |
|---------|---------|---------|-------|-------|-------|-------|-------|-------|
|---------|---------|---------|-------|-------|-------|-------|-------|-------|

|                                                                                               |                                                   |   |      |      |     |       |   |      |
|-----------------------------------------------------------------------------------------------|---------------------------------------------------|---|------|------|-----|-------|---|------|
| <b>EDP216</b><br>3 rare                                                                       | DPB1* 216:01Ne / DPB1* 357:01Ne / DPB1* 1044:01Ne | - | LFQG | EEFA | AAE | ILEEK | M | -    |
| <b>EDP1122</b><br>1 rare                                                                      | DPB1* 1122:01e                                    | - | LFQG | EECA | AAE | ILEEK | M | GGPM |
| <i>Both sides of this epitope require RARE alleles, review results to confirm assignment.</i> |                                                   |   |      |      |     |       |   |      |

OR

| EPITYPE                                                                                       | ALLELES                                           | P GROUP | HVR-A | HVR-B | HVR-C | HVR-D | HVR-E | HVR-F |
|-----------------------------------------------------------------------------------------------|---------------------------------------------------|---------|-------|-------|-------|-------|-------|-------|
| <b>EDP216</b><br>3 rare                                                                       | DPB1* 216:01Ne / DPB1* 357:01Ne / DPB1* 1044:01Ne | -       | LFQG  | EEFA  | AAE   | ILEEK | M     | -     |
| <b>EDP280</b><br>1 rare                                                                       | DPB1* 280:01e                                     | -       | LFQG  | EEFA  | AAE   | ILEEK | M     | GAPM  |
| <i>Both sides of this epitope require RARE alleles, review results to confirm assignment.</i> |                                                   |         |       |       |       |       |       |       |

OR

| EPITYPE                                                                                       | ALLELES                                           | P GROUP | HVR-A | HVR-B | HVR-C | HVR-D | HVR-E | HVR-F |
|-----------------------------------------------------------------------------------------------|---------------------------------------------------|---------|-------|-------|-------|-------|-------|-------|
| <b>EDP216</b><br>3 rare                                                                       | DPB1* 216:01Ne / DPB1* 357:01Ne / DPB1* 1044:01Ne | -       | LFQG  | EEFA  | AAE   | ILEEK | M     | -     |
| <b>EDP230</b><br>1 rare                                                                       | DPB1* 230:01e                                     | -       | LFQG  | EEFA  | AAE   | ILEEK | M     | GWPM  |
| <i>Both sides of this epitope require RARE alleles, review results to confirm assignment.</i> |                                                   |         |       |       |       |       |       |       |

OR

| EPITYPE                                                                                       | ALLELES                                           | P GROUP | HVR-A | HVR-B | HVR-C | HVR-D | HVR-E | HVR-F |
|-----------------------------------------------------------------------------------------------|---------------------------------------------------|---------|-------|-------|-------|-------|-------|-------|
| <b>EDP216</b><br>3 rare                                                                       | DPB1* 216:01Ne / DPB1* 357:01Ne / DPB1* 1044:01Ne | -       | LFQG  | EEFA  | AAE   | ILEEK | M     | -     |
| <b>EDP570</b><br>1 rare                                                                       | DPB1* 911:01Ne                                    | -       | -     | -     | -     | -     | -     | -     |
| <i>Both sides of this epitope require RARE alleles, review results to confirm assignment.</i> |                                                   |         |       |       |       |       |       |       |

OR

| EPITYPE | ALLELES | P GROUP | HVR-A | HVR-B | HVR-C | HVR-D | HVR-E | HVR-F |
|---------|---------|---------|-------|-------|-------|-------|-------|-------|
|---------|---------|---------|-------|-------|-------|-------|-------|-------|

|                                                                                               |                                                   |   |      |      |     |       |   |      |
|-----------------------------------------------------------------------------------------------|---------------------------------------------------|---|------|------|-----|-------|---|------|
| <b>EDP216</b><br>3 rare                                                                       | DPB1* 216:01Ne / DPB1* 357:01Ne / DPB1* 1044:01Ne | - | LFQG | EEFA | AAE | ILEEK | M | -    |
| <b>EDP840</b><br>1 rare                                                                       | DPB1* 840:01e                                     | - | IFQG | EEFA | AAE | ILEEK | M | GGPM |
| <i>Both sides of this epitope require RARE alleles, review results to confirm assignment.</i> |                                                   |   |      |      |     |       |   |      |

OR

| EPITYPE                                                                                       | ALLELES                                          | P GROUP | HVR-A | HVR-B | HVR-C | HVR-D | HVR-E | HVR-F |
|-----------------------------------------------------------------------------------------------|--------------------------------------------------|---------|-------|-------|-------|-------|-------|-------|
| <b>EDP176</b><br>1 rare                                                                       | DPB1* 176:01e                                    | -       | LFQG  | EEFA  | AAE   | ILKEK | M     | GGPM  |
| <b>EDP743</b><br>3 rare                                                                       | DPB1* 743:01Ne / DPB1* 748:01Ne / DPB1* 844:01Ne | -       | LFQG  | EEFA  | AAE   | -     | -     | -     |
| <i>Both sides of this epitope require RARE alleles, review results to confirm assignment.</i> |                                                  |         |       |       |       |       |       |       |

OR

| EPITYPE                                                                                       | ALLELES                                  | P GROUP | HVR-A | HVR-B | HVR-C | HVR-D | HVR-E | HVR-F |
|-----------------------------------------------------------------------------------------------|------------------------------------------|---------|-------|-------|-------|-------|-------|-------|
| <b>EDP176</b><br>1 rare                                                                       | DPB1* 176:01e                            | -       | LFQG  | EEFA  | AAE   | ILKEK | M     | GGPM  |
| <b>EDP227</b><br>3 rare                                                                       | DPB1* 227:01:01e, 227:01:02e, 227:01:03e | 227:01P | LFQG  | EELA  | AAE   | ILEEK | M     | GGPM  |
| <i>Both sides of this epitope require RARE alleles, review results to confirm assignment.</i> |                                          |         |       |       |       |       |       |       |

OR

| EPITYPE                                                                                       | ALLELES                                          | P GROUP | HVR-A | HVR-B | HVR-C | HVR-D | HVR-E | HVR-F |
|-----------------------------------------------------------------------------------------------|--------------------------------------------------|---------|-------|-------|-------|-------|-------|-------|
| <b>EDP456</b><br>1 rare                                                                       | DPB1* 456:01e                                    | -       | LFQG  | EEFA  | AAE   | ILEVK | M     | GGPM  |
| <b>EDP743</b><br>3 rare                                                                       | DPB1* 743:01Ne / DPB1* 748:01Ne / DPB1* 844:01Ne | -       | LFQG  | EEFA  | AAE   | -     | -     | -     |
| <i>Both sides of this epitope require RARE alleles, review results to confirm assignment.</i> |                                                  |         |       |       |       |       |       |       |

OR

| EPITYPE | ALLELES | P GROUP | HVR-A | HVR-B | HVR-C | HVR-D | HVR-E | HVR-F |
|---------|---------|---------|-------|-------|-------|-------|-------|-------|
|---------|---------|---------|-------|-------|-------|-------|-------|-------|



|                                                                                               |                                          |         |      |      |     |       |   |      |
|-----------------------------------------------------------------------------------------------|------------------------------------------|---------|------|------|-----|-------|---|------|
| <b>EDP227</b><br>3 rare                                                                       | DPB1* 227:01:01e, 227:01:02e, 227:01:03e | 227:01P | LFQG | EELA | AAE | ILEEK | M | GGPM |
| <b>EDP456</b><br>1 rare                                                                       | DPB1* 456:01e                            | -       | LFQG | EEFA | AAE | ILEVK | M | GGPM |
| <i>Both sides of this epitope require RARE alleles, review results to confirm assignment.</i> |                                          |         |      |      |     |       |   |      |

OR

| EPITYPE                                                                                       | ALLELES                                          | P GROUP | HVR-A | HVR-B | HVR-C | HVR-D | HVR-E | HVR-F |
|-----------------------------------------------------------------------------------------------|--------------------------------------------------|---------|-------|-------|-------|-------|-------|-------|
| <b>EDP743</b><br>3 rare                                                                       | DPB1* 743:01Ne / DPB1* 748:01Ne / DPB1* 844:01Ne | -       | LFQG  | EEFA  | AAE   | -     | -     | -     |
| <b>EDP1097</b><br>1 rare                                                                      | DPB1* 1097:01e                                   | -       | LFLG  | EEFA  | AAE   | ILEEK | M     | GGPM  |
| <i>Both sides of this epitope require RARE alleles, review results to confirm assignment.</i> |                                                  |         |       |       |       |       |       |       |

OR

| EPITYPE                                                                                       | ALLELES                                  | P GROUP | HVR-A | HVR-B | HVR-C | HVR-D | HVR-E | HVR-F |
|-----------------------------------------------------------------------------------------------|------------------------------------------|---------|-------|-------|-------|-------|-------|-------|
| <b>EDP227</b><br>3 rare                                                                       | DPB1* 227:01:01e, 227:01:02e, 227:01:03e | 227:01P | LFQG  | EELA  | AAE   | ILEEK | M     | GGPM  |
| <b>EDP1097</b><br>1 rare                                                                      | DPB1* 1097:01e                           | -       | LFLG  | EEFA  | AAE   | ILEEK | M     | GGPM  |
| <i>Both sides of this epitope require RARE alleles, review results to confirm assignment.</i> |                                          |         |       |       |       |       |       |       |

OR

| EPITYPE                                                                                       | ALLELES                                          | P GROUP | HVR-A | HVR-B | HVR-C | HVR-D | HVR-E | HVR-F |
|-----------------------------------------------------------------------------------------------|--------------------------------------------------|---------|-------|-------|-------|-------|-------|-------|
| <b>EDP303</b><br>1 rare                                                                       | DPB1* 303:01e                                    | -       | LFQG  | EEFA  | AAE   | ILEER | M     | GGPM  |
| <b>EDP743</b><br>3 rare                                                                       | DPB1* 743:01Ne / DPB1* 748:01Ne / DPB1* 844:01Ne | -       | LFQG  | EEFA  | AAE   | -     | -     | -     |
| <i>Both sides of this epitope require RARE alleles, review results to confirm assignment.</i> |                                                  |         |       |       |       |       |       |       |

OR

| EPITYPE | ALLELES | P GROUP | HVR-A | HVR-B | HVR-C | HVR-D | HVR-E | HVR-F |
|---------|---------|---------|-------|-------|-------|-------|-------|-------|
|---------|---------|---------|-------|-------|-------|-------|-------|-------|

|                                                                                               |                                          |         |      |      |     |       |   |      |
|-----------------------------------------------------------------------------------------------|------------------------------------------|---------|------|------|-----|-------|---|------|
| <b>EDP227</b><br>3 rare                                                                       | DPB1* 227:01:01e, 227:01:02e, 227:01:03e | 227:01P | LFQG | EELA | AAE | ILEEK | M | GGPM |
| <b>EDP303</b><br>1 rare                                                                       | DPB1* 303:01e                            | -       | LFQG | EEFA | AAE | ILEER | M | GGPM |
| <i>Both sides of this epitope require RARE alleles, review results to confirm assignment.</i> |                                          |         |      |      |     |       |   |      |

OR

| EPITYPE                                                                                       | ALLELES                                          | P GROUP | HVR-A | HVR-B | HVR-C | HVR-D | HVR-E | HVR-F |
|-----------------------------------------------------------------------------------------------|--------------------------------------------------|---------|-------|-------|-------|-------|-------|-------|
| <b>EDP743</b><br>3 rare                                                                       | DPB1* 743:01Ne / DPB1* 748:01Ne / DPB1* 844:01Ne | -       | LFQG  | EEFA  | AAE   | -     | -     | -     |
| <b>EDP753</b><br>1 rare                                                                       | DPB1* 753:01e                                    | -       | FFQG  | EEFA  | AAE   | ILEEK | M     | GGPM  |
| <i>Both sides of this epitope require RARE alleles, review results to confirm assignment.</i> |                                                  |         |       |       |       |       |       |       |

OR

| EPITYPE                                                                                       | ALLELES                                          | P GROUP | HVR-A | HVR-B | HVR-C | HVR-D | HVR-E | HVR-F |
|-----------------------------------------------------------------------------------------------|--------------------------------------------------|---------|-------|-------|-------|-------|-------|-------|
| <b>EDP743</b><br>3 rare                                                                       | DPB1* 743:01Ne / DPB1* 748:01Ne / DPB1* 844:01Ne | -       | LFQG  | EEFA  | AAE   | -     | -     | -     |
| <b>EDP934</b><br>1 rare                                                                       | DPB1* 934:01Qe                                   | -       | LFQG  | EF.A  | AAE   | ILEEK | M     | GGPM  |
| <i>Both sides of this epitope require RARE alleles, review results to confirm assignment.</i> |                                                  |         |       |       |       |       |       |       |

OR

| EPITYPE                                                                                       | ALLELES                                          | P GROUP | HVR-A | HVR-B | HVR-C | HVR-D | HVR-E | HVR-F |
|-----------------------------------------------------------------------------------------------|--------------------------------------------------|---------|-------|-------|-------|-------|-------|-------|
| <b>EDP743</b><br>3 rare                                                                       | DPB1* 743:01Ne / DPB1* 748:01Ne / DPB1* 844:01Ne | -       | LFQG  | EEFA  | AAE   | -     | -     | -     |
| <b>EDP874</b><br>1 rare                                                                       | DPB1* 874:01Ne                                   | -       | LFQG  | EEFA  | AAE   | ILEEK | C     | -     |
| <i>Both sides of this epitope require RARE alleles, review results to confirm assignment.</i> |                                                  |         |       |       |       |       |       |       |

OR

| EPITYPE | ALLELES | P GROUP | HVR-A | HVR-B | HVR-C | HVR-D | HVR-E | HVR-F |
|---------|---------|---------|-------|-------|-------|-------|-------|-------|
|---------|---------|---------|-------|-------|-------|-------|-------|-------|

|                                                                                               |                                                  |   |      |      |     |       |   |      |
|-----------------------------------------------------------------------------------------------|--------------------------------------------------|---|------|------|-----|-------|---|------|
| <b>EDP254</b><br>1 rare                                                                       | DPB1* 254:01e                                    | - | LFQG | EEFA | AVE | ILEEK | M | GGPM |
| <b>EDP743</b><br>3 rare                                                                       | DPB1* 743:01Ne / DPB1* 748:01Ne / DPB1* 844:01Ne | - | LFQG | EEFA | AAE | -     | - | -    |
| <i>Both sides of this epitope require RARE alleles, review results to confirm assignment.</i> |                                                  |   |      |      |     |       |   |      |

OR

| EPITYPE                                                                                       | ALLELES                                          | P GROUP | HVR-A | HVR-B | HVR-C | HVR-D | HVR-E | HVR-F |
|-----------------------------------------------------------------------------------------------|--------------------------------------------------|---------|-------|-------|-------|-------|-------|-------|
| <b>EDP454</b><br>1 rare                                                                       | DPB1* 454:01e                                    | -       | LFQG  | EEFA  | AAE   | ILEEK | M     | GEPM  |
| <b>EDP743</b><br>3 rare                                                                       | DPB1* 743:01Ne / DPB1* 748:01Ne / DPB1* 844:01Ne | -       | LFQG  | EEFA  | AAE   | -     | -     | -     |
| <i>Both sides of this epitope require RARE alleles, review results to confirm assignment.</i> |                                                  |         |       |       |       |       |       |       |

OR

| EPITYPE                                                                                       | ALLELES                                          | P GROUP | HVR-A | HVR-B | HVR-C | HVR-D | HVR-E | HVR-F |
|-----------------------------------------------------------------------------------------------|--------------------------------------------------|---------|-------|-------|-------|-------|-------|-------|
| <b>EDP743</b><br>3 rare                                                                       | DPB1* 743:01Ne / DPB1* 748:01Ne / DPB1* 844:01Ne | -       | LFQG  | EEFA  | AAE   | -     | -     | -     |
| <b>EDP1046</b><br>1 rare                                                                      | DPB1* 1046:01e                                   | -       | LFQG  | EEIA  | AAE   | ILEEK | M     | GGPM  |
| <i>Both sides of this epitope require RARE alleles, review results to confirm assignment.</i> |                                                  |         |       |       |       |       |       |       |

OR

| EPITYPE                                                                                       | ALLELES                                          | P GROUP | HVR-A | HVR-B | HVR-C | HVR-D | HVR-E | HVR-F |
|-----------------------------------------------------------------------------------------------|--------------------------------------------------|---------|-------|-------|-------|-------|-------|-------|
| <b>EDP743</b><br>3 rare                                                                       | DPB1* 743:01Ne / DPB1* 748:01Ne / DPB1* 844:01Ne | -       | LFQG  | EEFA  | AAE   | -     | -     | -     |
| <b>EDP921</b><br>1 rare                                                                       | DPB1* 921:01e                                    | -       | LFQG  | GEFA  | AAE   | ILEEK | M     | GGPM  |
| <i>Both sides of this epitope require RARE alleles, review results to confirm assignment.</i> |                                                  |         |       |       |       |       |       |       |

OR

| EPITYPE | ALLELES | P GROUP | HVR-A | HVR-B | HVR-C | HVR-D | HVR-E | HVR-F |
|---------|---------|---------|-------|-------|-------|-------|-------|-------|
|---------|---------|---------|-------|-------|-------|-------|-------|-------|

|                                                                                               |                                                  |   |      |      |     |       |   |      |
|-----------------------------------------------------------------------------------------------|--------------------------------------------------|---|------|------|-----|-------|---|------|
| <b>EDP743</b><br>3 rare                                                                       | DPB1* 743:01Ne / DPB1* 748:01Ne / DPB1* 844:01Ne | - | LFQG | EEFA | AAE | -     | - | -    |
| <b>EDP871</b><br>1 rare                                                                       | DPB1* 871:01Ne                                   | - | LFQG | EEFA | AAE | HPGGE | D | GRAH |
| <i>Both sides of this epitope require RARE alleles, review results to confirm assignment.</i> |                                                  |   |      |      |     |       |   |      |

OR

| EPITYPE                                                                                       | ALLELES                                          | P GROUP | HVR-A | HVR-B | HVR-C | HVR-D | HVR-E | HVR-F |
|-----------------------------------------------------------------------------------------------|--------------------------------------------------|---------|-------|-------|-------|-------|-------|-------|
| <b>EDP399</b><br>1 rare                                                                       | DPB1* 399:01e                                    | -       | LFQG  | EEFA  | AAE   | IVEEK | M     | GGPM  |
| <b>EDP743</b><br>3 rare                                                                       | DPB1* 743:01Ne / DPB1* 748:01Ne / DPB1* 844:01Ne | -       | LFQG  | EEFA  | AAE   | -     | -     | -     |
| <i>Both sides of this epitope require RARE alleles, review results to confirm assignment.</i> |                                                  |         |       |       |       |       |       |       |

OR

| EPITYPE                                                                                       | ALLELES                                          | P GROUP | HVR-A | HVR-B | HVR-C | HVR-D | HVR-E | HVR-F |
|-----------------------------------------------------------------------------------------------|--------------------------------------------------|---------|-------|-------|-------|-------|-------|-------|
| <b>EDP319</b><br>1 rare                                                                       | DPB1* 319:01e                                    | -       | LFQG  | EEFA  | AAE   | IQEEK | M     | GGPM  |
| <b>EDP743</b><br>3 rare                                                                       | DPB1* 743:01Ne / DPB1* 748:01Ne / DPB1* 844:01Ne | -       | LFQG  | EEFA  | AAE   | -     | -     | -     |
| <i>Both sides of this epitope require RARE alleles, review results to confirm assignment.</i> |                                                  |         |       |       |       |       |       |       |

OR

| EPITYPE                                                                                       | ALLELES                                          | P GROUP | HVR-A | HVR-B | HVR-C | HVR-D | HVR-E | HVR-F |
|-----------------------------------------------------------------------------------------------|--------------------------------------------------|---------|-------|-------|-------|-------|-------|-------|
| <b>EDP179</b><br>1 rare                                                                       | DPB1* 179:01e                                    | -       | LFQG  | EEFA  | AAE   | LLEER | M     | GGPM  |
| <b>EDP743</b><br>3 rare                                                                       | DPB1* 743:01Ne / DPB1* 748:01Ne / DPB1* 844:01Ne | -       | LFQG  | EEFA  | AAE   | -     | -     | -     |
| <i>Both sides of this epitope require RARE alleles, review results to confirm assignment.</i> |                                                  |         |       |       |       |       |       |       |

OR

| EPITYPE | ALLELES | P GROUP | HVR-A | HVR-B | HVR-C | HVR-D | HVR-E | HVR-F |
|---------|---------|---------|-------|-------|-------|-------|-------|-------|
|---------|---------|---------|-------|-------|-------|-------|-------|-------|

|                                                                                               |                                                  |   |      |      |     |       |   |      |
|-----------------------------------------------------------------------------------------------|--------------------------------------------------|---|------|------|-----|-------|---|------|
| <b>EDP679</b><br>1 rare                                                                       | DPB1* 679:01e                                    | - | PFQG | EEFA | AAE | ILEEK | M | GGPM |
| <b>EDP743</b><br>3 rare                                                                       | DPB1* 743:01Ne / DPB1* 748:01Ne / DPB1* 844:01Ne | - | LFQG | EEFA | AAE | -     | - | -    |
| <i>Both sides of this epitope require RARE alleles, review results to confirm assignment.</i> |                                                  |   |      |      |     |       |   |      |

OR

| EPITYPE                                                                                       | ALLELES                                          | P GROUP | HVR-A | HVR-B | HVR-C | HVR-D | HVR-E | HVR-F |
|-----------------------------------------------------------------------------------------------|--------------------------------------------------|---------|-------|-------|-------|-------|-------|-------|
| <b>EDP592</b><br>1 rare                                                                       | DPB1* 592:01e                                    | -       | LFQG  | EEFA  | AAE   | ILEEK | M     | GGPR  |
| <b>EDP743</b><br>3 rare                                                                       | DPB1* 743:01Ne / DPB1* 748:01Ne / DPB1* 844:01Ne | -       | LFQG  | EEFA  | AAE   | -     | -     | -     |
| <i>Both sides of this epitope require RARE alleles, review results to confirm assignment.</i> |                                                  |         |       |       |       |       |       |       |

OR

| EPITYPE                                                                                       | ALLELES                                          | P GROUP | HVR-A | HVR-B | HVR-C | HVR-D | HVR-E | HVR-F |
|-----------------------------------------------------------------------------------------------|--------------------------------------------------|---------|-------|-------|-------|-------|-------|-------|
| <b>EDP743</b><br>3 rare                                                                       | DPB1* 743:01Ne / DPB1* 748:01Ne / DPB1* 844:01Ne | -       | LFQG  | EEFA  | AAE   | -     | -     | -     |
| <b>EDP972</b><br>1 rare                                                                       | DPB1* 972:01e                                    | -       | LFQG  | GEFV  | AAE   | ILEEK | M     | GGPM  |
| <i>Both sides of this epitope require RARE alleles, review results to confirm assignment.</i> |                                                  |         |       |       |       |       |       |       |

OR

| EPITYPE                                                                                       | ALLELES                                          | P GROUP | HVR-A | HVR-B | HVR-C | HVR-D | HVR-E | HVR-F |
|-----------------------------------------------------------------------------------------------|--------------------------------------------------|---------|-------|-------|-------|-------|-------|-------|
| <b>EDP642</b><br>1 rare                                                                       | DPB1* 642:01e                                    | -       | LFQG  | EEFA  | DAE   | ILEEK | M     | GGPM  |
| <b>EDP743</b><br>3 rare                                                                       | DPB1* 743:01Ne / DPB1* 748:01Ne / DPB1* 844:01Ne | -       | LFQG  | EEFA  | AAE   | -     | -     | -     |
| <i>Both sides of this epitope require RARE alleles, review results to confirm assignment.</i> |                                                  |         |       |       |       |       |       |       |

OR

| EPITYPE | ALLELES | P GROUP | HVR-A | HVR-B | HVR-C | HVR-D | HVR-E | HVR-F |
|---------|---------|---------|-------|-------|-------|-------|-------|-------|
|---------|---------|---------|-------|-------|-------|-------|-------|-------|

|                                                                                               |                                                  |   |      |      |     |       |   |      |
|-----------------------------------------------------------------------------------------------|--------------------------------------------------|---|------|------|-----|-------|---|------|
| <b>EDP743</b><br>3 rare                                                                       | DPB1* 743:01Ne / DPB1* 748:01Ne / DPB1* 844:01Ne | - | LFQG | EEFA | AAE | -     | - | -    |
| <b>EDP1081</b><br>1 rare                                                                      | DPB1* 1081:01e                                   | - | LFQG | EEFA | AAE | VLEEK | M | GGPM |
| <i>Both sides of this epitope require RARE alleles, review results to confirm assignment.</i> |                                                  |   |      |      |     |       |   |      |

OR

| EPITYPE                                                                                       | ALLELES                                          | P GROUP | HVR-A | HVR-B | HVR-C | HVR-D | HVR-E | HVR-F |
|-----------------------------------------------------------------------------------------------|--------------------------------------------------|---------|-------|-------|-------|-------|-------|-------|
| <b>EDP743</b><br>3 rare                                                                       | DPB1* 743:01Ne / DPB1* 748:01Ne / DPB1* 844:01Ne | -       | LFQG  | EEFA  | AAE   | -     | -     | -     |
| <b>EDP1135</b><br>1 rare                                                                      | DPB1* 1135:01Ne                                  | -       | LFQG  | EEFA  | AAE   | ILGGE | D     | GRAH  |
| <i>Both sides of this epitope require RARE alleles, review results to confirm assignment.</i> |                                                  |         |       |       |       |       |       |       |

OR

| EPITYPE                                                                                       | ALLELES                                          | P GROUP | HVR-A | HVR-B | HVR-C | HVR-D | HVR-E | HVR-F |
|-----------------------------------------------------------------------------------------------|--------------------------------------------------|---------|-------|-------|-------|-------|-------|-------|
| <b>EDP687</b><br>1 rare                                                                       | DPB1* 687:01e                                    | -       | LFQL  | EEFA  | AAE   | ILEEK | M     | GGPM  |
| <b>EDP743</b><br>3 rare                                                                       | DPB1* 743:01Ne / DPB1* 748:01Ne / DPB1* 844:01Ne | -       | LFQG  | EEFA  | AAE   | -     | -     | -     |
| <i>Both sides of this epitope require RARE alleles, review results to confirm assignment.</i> |                                                  |         |       |       |       |       |       |       |

OR

| EPITYPE                                                                                       | ALLELES                                          | P GROUP | HVR-A | HVR-B | HVR-C | HVR-D | HVR-E | HVR-F |
|-----------------------------------------------------------------------------------------------|--------------------------------------------------|---------|-------|-------|-------|-------|-------|-------|
| <b>EDP427</b><br>1 rare                                                                       | DPB1* 427:01e                                    | -       | LFQG  | EEFA  | ATE   | ILEEK | M     | GGPM  |
| <b>EDP743</b><br>3 rare                                                                       | DPB1* 743:01Ne / DPB1* 748:01Ne / DPB1* 844:01Ne | -       | LFQG  | EEFA  | AAE   | -     | -     | -     |
| <i>Both sides of this epitope require RARE alleles, review results to confirm assignment.</i> |                                                  |         |       |       |       |       |       |       |

OR

| EPITYPE | ALLELES | P GROUP | HVR-A | HVR-B | HVR-C | HVR-D | HVR-E | HVR-F |
|---------|---------|---------|-------|-------|-------|-------|-------|-------|
|---------|---------|---------|-------|-------|-------|-------|-------|-------|

|                                                                                               |                                                  |   |      |      |     |       |   |      |
|-----------------------------------------------------------------------------------------------|--------------------------------------------------|---|------|------|-----|-------|---|------|
| <b>EDP743</b><br>3 rare                                                                       | DPB1* 743:01Ne / DPB1* 748:01Ne / DPB1* 844:01Ne | - | LFQG | EEFA | AAE | -     | - | -    |
| <b>EDP867</b><br>1 rare                                                                       | DPB1* 867:01Ne                                   | - | LFQG | EEFA | CCG | HPGGE | D | GRAH |
| <i>Both sides of this epitope require RARE alleles, review results to confirm assignment.</i> |                                                  |   |      |      |     |       |   |      |

OR

| EPITYPE                                                                                       | ALLELES                                          | P GROUP | HVR-A | HVR-B | HVR-C | HVR-D | HVR-E | HVR-F |
|-----------------------------------------------------------------------------------------------|--------------------------------------------------|---------|-------|-------|-------|-------|-------|-------|
| <b>EDP177</b><br>1 rare                                                                       | DPB1* 177:01e                                    | -       | LFQG  | EEFA  | AAE   | ILEEK | M     | SGPM  |
| <b>EDP743</b><br>3 rare                                                                       | DPB1* 743:01Ne / DPB1* 748:01Ne / DPB1* 844:01Ne | -       | LFQG  | EEFA  | AAE   | -     | -     | -     |
| <i>Both sides of this epitope require RARE alleles, review results to confirm assignment.</i> |                                                  |         |       |       |       |       |       |       |

OR

| EPITYPE                                                                                       | ALLELES                                          | P GROUP | HVR-A | HVR-B | HVR-C | HVR-D | HVR-E | HVR-F |
|-----------------------------------------------------------------------------------------------|--------------------------------------------------|---------|-------|-------|-------|-------|-------|-------|
| <b>EDP743</b><br>3 rare                                                                       | DPB1* 743:01Ne / DPB1* 748:01Ne / DPB1* 844:01Ne | -       | LFQG  | EEFA  | AAE   | -     | -     | -     |
| <b>EDP747</b><br>1 rare                                                                       | DPB1* 747:01e                                    | -       | VFQG  | EEFA  | AAE   | ILEEK | M     | GGPM  |
| <i>Both sides of this epitope require RARE alleles, review results to confirm assignment.</i> |                                                  |         |       |       |       |       |       |       |

OR

| EPITYPE                                                                                       | ALLELES                                          | P GROUP | HVR-A | HVR-B | HVR-C | HVR-D | HVR-E | HVR-F |
|-----------------------------------------------------------------------------------------------|--------------------------------------------------|---------|-------|-------|-------|-------|-------|-------|
| <b>EDP743</b><br>3 rare                                                                       | DPB1* 743:01Ne / DPB1* 748:01Ne / DPB1* 844:01Ne | -       | LFQG  | EEFA  | AAE   | -     | -     | -     |
| <b>EDP1122</b><br>1 rare                                                                      | DPB1* 1122:01e                                   | -       | LFQG  | EECA  | AAE   | ILEEK | M     | GGPM  |
| <i>Both sides of this epitope require RARE alleles, review results to confirm assignment.</i> |                                                  |         |       |       |       |       |       |       |

OR

| EPITYPE | ALLELES | P GROUP | HVR-A | HVR-B | HVR-C | HVR-D | HVR-E | HVR-F |
|---------|---------|---------|-------|-------|-------|-------|-------|-------|
|---------|---------|---------|-------|-------|-------|-------|-------|-------|

|                                                                                               |                                                  |   |      |      |     |       |   |             |
|-----------------------------------------------------------------------------------------------|--------------------------------------------------|---|------|------|-----|-------|---|-------------|
| <b>EDP280</b><br>1 rare                                                                       | DPB1* 280:01e                                    | - | LFQG | EEFA | AAE | ILEEK | M | <b>GAPM</b> |
| <b>EDP743</b><br>3 rare                                                                       | DPB1* 743:01Ne / DPB1* 748:01Ne / DPB1* 844:01Ne | - | LFQG | EEFA | AAE | -     | - | -           |
| <i>Both sides of this epitope require RARE alleles, review results to confirm assignment.</i> |                                                  |   |      |      |     |       |   |             |

OR

| EPITYPE                                                                                       | ALLELES                                          | P GROUP | HVR-A | HVR-B | HVR-C | HVR-D | HVR-E | HVR-F       |
|-----------------------------------------------------------------------------------------------|--------------------------------------------------|---------|-------|-------|-------|-------|-------|-------------|
| <b>EDP230</b><br>1 rare                                                                       | DPB1* 230:01e                                    | -       | LFQG  | EEFA  | AAE   | ILEEK | M     | <b>GWPM</b> |
| <b>EDP743</b><br>3 rare                                                                       | DPB1* 743:01Ne / DPB1* 748:01Ne / DPB1* 844:01Ne | -       | LFQG  | EEFA  | AAE   | -     | -     | -           |
| <i>Both sides of this epitope require RARE alleles, review results to confirm assignment.</i> |                                                  |         |       |       |       |       |       |             |

OR

| EPITYPE                                                                                       | ALLELES                                          | P GROUP | HVR-A | HVR-B | HVR-C | HVR-D | HVR-E | HVR-F |
|-----------------------------------------------------------------------------------------------|--------------------------------------------------|---------|-------|-------|-------|-------|-------|-------|
| <b>EDP570</b><br>1 rare                                                                       | DPB1* 911:01Ne                                   | -       | -     | -     | -     | -     | -     | -     |
| <b>EDP743</b><br>3 rare                                                                       | DPB1* 743:01Ne / DPB1* 748:01Ne / DPB1* 844:01Ne | -       | LFQG  | EEFA  | AAE   | -     | -     | -     |
| <i>Both sides of this epitope require RARE alleles, review results to confirm assignment.</i> |                                                  |         |       |       |       |       |       |       |

OR

| EPITYPE                                                                                       | ALLELES                                          | P GROUP | HVR-A       | HVR-B | HVR-C | HVR-D | HVR-E | HVR-F |
|-----------------------------------------------------------------------------------------------|--------------------------------------------------|---------|-------------|-------|-------|-------|-------|-------|
| <b>EDP743</b><br>3 rare                                                                       | DPB1* 743:01Ne / DPB1* 748:01Ne / DPB1* 844:01Ne | -       | LFQG        | EEFA  | AAE   | -     | -     | -     |
| <b>EDP840</b><br>1 rare                                                                       | DPB1* 840:01e                                    | -       | <b>IFQG</b> | EEFA  | AAE   | ILEEK | M     | GGPM  |
| <i>Both sides of this epitope require RARE alleles, review results to confirm assignment.</i> |                                                  |         |             |       |       |       |       |       |

OR

| EPITYPE | ALLELES | P GROUP | HVR-A | HVR-B | HVR-C | HVR-D | HVR-E | HVR-F |
|---------|---------|---------|-------|-------|-------|-------|-------|-------|
|---------|---------|---------|-------|-------|-------|-------|-------|-------|



|                                                                                               |                                          |         |      |      |     |       |   |      |
|-----------------------------------------------------------------------------------------------|------------------------------------------|---------|------|------|-----|-------|---|------|
| <b>EDP227</b><br>3 rare                                                                       | DPB1* 227:01:01e, 227:01:02e, 227:01:03e | 227:01P | LFQG | EELA | AAE | ILEEK | M | GGPM |
| <b>EDP753</b><br>1 rare                                                                       | DPB1* 753:01e                            | -       | FFQG | EEFA | AAE | ILEEK | M | GGPM |
| <i>Both sides of this epitype require RARE alleles, review results to confirm assignment.</i> |                                          |         |      |      |     |       |   |      |

OR

| EPITYPE                                                                                       | ALLELES                                  | P GROUP | HVR-A | HVR-B | HVR-C | HVR-D | HVR-E | HVR-F |
|-----------------------------------------------------------------------------------------------|------------------------------------------|---------|-------|-------|-------|-------|-------|-------|
| <b>EDP227</b><br>3 rare                                                                       | DPB1* 227:01:01e, 227:01:02e, 227:01:03e | 227:01P | LFQG  | EELA  | AAE   | ILEEK | M     | GGPM  |
| <b>EDP934</b><br>1 rare                                                                       | DPB1* 934:01Qe                           | -       | LFQG  | EF.A  | AAE   | ILEEK | M     | GGPM  |
| <i>Both sides of this epitype require RARE alleles, review results to confirm assignment.</i> |                                          |         |       |       |       |       |       |       |

OR

| EPITYPE                                                                                       | ALLELES                                  | P GROUP | HVR-A | HVR-B | HVR-C | HVR-D | HVR-E | HVR-F |
|-----------------------------------------------------------------------------------------------|------------------------------------------|---------|-------|-------|-------|-------|-------|-------|
| <b>EDP227</b><br>3 rare                                                                       | DPB1* 227:01:01e, 227:01:02e, 227:01:03e | 227:01P | LFQG  | EELA  | AAE   | ILEEK | M     | GGPM  |
| <b>EDP874</b><br>1 rare                                                                       | DPB1* 874:01Ne                           | -       | LFQG  | EEFA  | AAE   | ILEEK | C     | -     |
| <i>Both sides of this epitype require RARE alleles, review results to confirm assignment.</i> |                                          |         |       |       |       |       |       |       |

OR

| EPITYPE                                                                                       | ALLELES                                  | P GROUP | HVR-A | HVR-B | HVR-C | HVR-D | HVR-E | HVR-F |
|-----------------------------------------------------------------------------------------------|------------------------------------------|---------|-------|-------|-------|-------|-------|-------|
| <b>EDP227</b><br>3 rare                                                                       | DPB1* 227:01:01e, 227:01:02e, 227:01:03e | 227:01P | LFQG  | EELA  | AAE   | ILEEK | M     | GGPM  |
| <b>EDP254</b><br>1 rare                                                                       | DPB1* 254:01e                            | -       | LFQG  | EEFA  | AVE   | ILEEK | M     | GGPM  |
| <i>Both sides of this epitype require RARE alleles, review results to confirm assignment.</i> |                                          |         |       |       |       |       |       |       |

OR

| EPITYPE | ALLELES | P GROUP | HVR-A | HVR-B | HVR-C | HVR-D | HVR-E | HVR-F |
|---------|---------|---------|-------|-------|-------|-------|-------|-------|
|---------|---------|---------|-------|-------|-------|-------|-------|-------|

|                                                                                               |                                          |         |      |      |     |       |   |      |
|-----------------------------------------------------------------------------------------------|------------------------------------------|---------|------|------|-----|-------|---|------|
| <b>EDP227</b><br>3 rare                                                                       | DPB1* 227:01:01e, 227:01:02e, 227:01:03e | 227:01P | LFQG | EELA | AAE | ILEEK | M | GGPM |
| <b>EDP454</b><br>1 rare                                                                       | DPB1* 454:01e                            | -       | LFQG | EEFA | AAE | ILEEK | M | GEPM |
| <i>Both sides of this epitype require RARE alleles, review results to confirm assignment.</i> |                                          |         |      |      |     |       |   |      |

OR

| EPITYPE                                                                                       | ALLELES                                  | P GROUP | HVR-A | HVR-B | HVR-C | HVR-D | HVR-E | HVR-F |
|-----------------------------------------------------------------------------------------------|------------------------------------------|---------|-------|-------|-------|-------|-------|-------|
| <b>EDP227</b><br>3 rare                                                                       | DPB1* 227:01:01e, 227:01:02e, 227:01:03e | 227:01P | LFQG  | EELA  | AAE   | ILEEK | M     | GGPM  |
| <b>EDP1046</b><br>1 rare                                                                      | DPB1* 1046:01e                           | -       | LFQG  | EEIA  | AAE   | ILEEK | M     | GGPM  |
| <i>Both sides of this epitype require RARE alleles, review results to confirm assignment.</i> |                                          |         |       |       |       |       |       |       |

OR

| EPITYPE                                                                                       | ALLELES                                  | P GROUP | HVR-A | HVR-B | HVR-C | HVR-D | HVR-E | HVR-F |
|-----------------------------------------------------------------------------------------------|------------------------------------------|---------|-------|-------|-------|-------|-------|-------|
| <b>EDP227</b><br>3 rare                                                                       | DPB1* 227:01:01e, 227:01:02e, 227:01:03e | 227:01P | LFQG  | EELA  | AAE   | ILEEK | M     | GGPM  |
| <b>EDP921</b><br>1 rare                                                                       | DPB1* 921:01e                            | -       | LFQG  | GEFA  | AAE   | ILEEK | M     | GGPM  |
| <i>Both sides of this epitype require RARE alleles, review results to confirm assignment.</i> |                                          |         |       |       |       |       |       |       |

OR

| EPITYPE                                                                                       | ALLELES                                  | P GROUP | HVR-A | HVR-B | HVR-C | HVR-D | HVR-E | HVR-F |
|-----------------------------------------------------------------------------------------------|------------------------------------------|---------|-------|-------|-------|-------|-------|-------|
| <b>EDP227</b><br>3 rare                                                                       | DPB1* 227:01:01e, 227:01:02e, 227:01:03e | 227:01P | LFQG  | EELA  | AAE   | ILEEK | M     | GGPM  |
| <b>EDP871</b><br>1 rare                                                                       | DPB1* 871:01Ne                           | -       | LFQG  | EEFA  | AAE   | HPGGE | D     | GRAH  |
| <i>Both sides of this epitype require RARE alleles, review results to confirm assignment.</i> |                                          |         |       |       |       |       |       |       |

OR

| EPITYPE | ALLELES | P GROUP | HVR-A | HVR-B | HVR-C | HVR-D | HVR-E | HVR-F |
|---------|---------|---------|-------|-------|-------|-------|-------|-------|
|---------|---------|---------|-------|-------|-------|-------|-------|-------|

|                                                                                               |                                 |   |      |      |     |       |   |      |
|-----------------------------------------------------------------------------------------------|---------------------------------|---|------|------|-----|-------|---|------|
| <b>EDP399</b><br>1 rare                                                                       | DPB1* 399:01e                   | - | LFQG | EEFA | AAE | IVEEK | M | GGPM |
| <b>EDP1016</b><br>2 rare                                                                      | DPB1* 1016:01e / DPB1* 1138:01e | - | LLQG | EEFA | AAE | ILEEK | M | GGPM |
| <i>Both sides of this epitope require RARE alleles, review results to confirm assignment.</i> |                                 |   |      |      |     |       |   |      |

OR

| EPITYPE                                                                                       | ALLELES                         | P GROUP | HVR-A | HVR-B | HVR-C | HVR-D | HVR-E | HVR-F |
|-----------------------------------------------------------------------------------------------|---------------------------------|---------|-------|-------|-------|-------|-------|-------|
| <b>EDP319</b><br>1 rare                                                                       | DPB1* 319:01e                   | -       | LFQG  | EEFA  | AAE   | IQEEK | M     | GGPM  |
| <b>EDP1016</b><br>2 rare                                                                      | DPB1* 1016:01e / DPB1* 1138:01e | -       | LLQG  | EEFA  | AAE   | ILEEK | M     | GGPM  |
| <i>Both sides of this epitope require RARE alleles, review results to confirm assignment.</i> |                                 |         |       |       |       |       |       |       |

OR

| EPITYPE                                                                                       | ALLELES                         | P GROUP | HVR-A | HVR-B | HVR-C | HVR-D | HVR-E | HVR-F |
|-----------------------------------------------------------------------------------------------|---------------------------------|---------|-------|-------|-------|-------|-------|-------|
| <b>EDP179</b><br>1 rare                                                                       | DPB1* 179:01e                   | -       | LFQG  | EEFA  | AAE   | LLEER | M     | GGPM  |
| <b>EDP1016</b><br>2 rare                                                                      | DPB1* 1016:01e / DPB1* 1138:01e | -       | LLQG  | EEFA  | AAE   | ILEEK | M     | GGPM  |
| <i>Both sides of this epitope require RARE alleles, review results to confirm assignment.</i> |                                 |         |       |       |       |       |       |       |

OR

| EPITYPE                                                                                       | ALLELES                         | P GROUP | HVR-A | HVR-B | HVR-C | HVR-D | HVR-E | HVR-F |
|-----------------------------------------------------------------------------------------------|---------------------------------|---------|-------|-------|-------|-------|-------|-------|
| <b>EDP679</b><br>1 rare                                                                       | DPB1* 679:01e                   | -       | PFQG  | EEFA  | AAE   | ILEEK | M     | GGPM  |
| <b>EDP1016</b><br>2 rare                                                                      | DPB1* 1016:01e / DPB1* 1138:01e | -       | LLQG  | EEFA  | AAE   | ILEEK | M     | GGPM  |
| <i>Both sides of this epitope require RARE alleles, review results to confirm assignment.</i> |                                 |         |       |       |       |       |       |       |

OR

| EPITYPE | ALLELES | P GROUP | HVR-A | HVR-B | HVR-C | HVR-D | HVR-E | HVR-F |
|---------|---------|---------|-------|-------|-------|-------|-------|-------|
|---------|---------|---------|-------|-------|-------|-------|-------|-------|

|                                                                                               |                                 |   |      |      |     |       |   |      |
|-----------------------------------------------------------------------------------------------|---------------------------------|---|------|------|-----|-------|---|------|
| <b>EDP592</b><br>1 rare                                                                       | DPB1* 592:01e                   | - | LFQG | EEFA | AAE | ILEEK | M | GGPR |
| <b>EDP1016</b><br>2 rare                                                                      | DPB1* 1016:01e / DPB1* 1138:01e | - | LLQG | EEFA | AAE | ILEEK | M | GGPM |
| <i>Both sides of this epitype require RARE alleles, review results to confirm assignment.</i> |                                 |   |      |      |     |       |   |      |

OR

| EPITYPE                                                                                       | ALLELES                         | P GROUP | HVR-A | HVR-B | HVR-C | HVR-D | HVR-E | HVR-F |
|-----------------------------------------------------------------------------------------------|---------------------------------|---------|-------|-------|-------|-------|-------|-------|
| <b>EDP972</b><br>1 rare                                                                       | DPB1* 972:01e                   | -       | LFQG  | GEFV  | AAE   | ILEEK | M     | GGPM  |
| <b>EDP1016</b><br>2 rare                                                                      | DPB1* 1016:01e / DPB1* 1138:01e | -       | LLQG  | EEFA  | AAE   | ILEEK | M     | GGPM  |
| <i>Both sides of this epitype require RARE alleles, review results to confirm assignment.</i> |                                 |         |       |       |       |       |       |       |

OR

| EPITYPE                                                                                       | ALLELES                         | P GROUP | HVR-A | HVR-B | HVR-C | HVR-D | HVR-E | HVR-F |
|-----------------------------------------------------------------------------------------------|---------------------------------|---------|-------|-------|-------|-------|-------|-------|
| <b>EDP642</b><br>1 rare                                                                       | DPB1* 642:01e                   | -       | LFQG  | EEFA  | DAE   | ILEEK | M     | GGPM  |
| <b>EDP1016</b><br>2 rare                                                                      | DPB1* 1016:01e / DPB1* 1138:01e | -       | LLQG  | EEFA  | AAE   | ILEEK | M     | GGPM  |
| <i>Both sides of this epitype require RARE alleles, review results to confirm assignment.</i> |                                 |         |       |       |       |       |       |       |

OR

| EPITYPE                                                                                       | ALLELES                         | P GROUP | HVR-A | HVR-B | HVR-C | HVR-D | HVR-E | HVR-F |
|-----------------------------------------------------------------------------------------------|---------------------------------|---------|-------|-------|-------|-------|-------|-------|
| <b>EDP1016</b><br>2 rare                                                                      | DPB1* 1016:01e / DPB1* 1138:01e | -       | LLQG  | EEFA  | AAE   | ILEEK | M     | GGPM  |
| <b>EDP1081</b><br>1 rare                                                                      | DPB1* 1081:01e                  | -       | LFQG  | EEFA  | AAE   | VLEEK | M     | GGPM  |
| <i>Both sides of this epitype require RARE alleles, review results to confirm assignment.</i> |                                 |         |       |       |       |       |       |       |

OR

| EPITYPE | ALLELES | P GROUP | HVR-A | HVR-B | HVR-C | HVR-D | HVR-E | HVR-F |
|---------|---------|---------|-------|-------|-------|-------|-------|-------|
|---------|---------|---------|-------|-------|-------|-------|-------|-------|

|                                                                                               |                                 |   |      |      |     |       |   |      |
|-----------------------------------------------------------------------------------------------|---------------------------------|---|------|------|-----|-------|---|------|
| <b>EDP1016</b><br>2 rare                                                                      | DPB1* 1016:01e / DPB1* 1138:01e | - | LLQG | EEFA | AAE | ILEEK | M | GGPM |
| <b>EDP1135</b><br>1 rare                                                                      | DPB1* 1135:01Ne                 | - | LFQG | EEFA | AAE | ILGGE | D | GRAH |
| <i>Both sides of this epitope require RARE alleles, review results to confirm assignment.</i> |                                 |   |      |      |     |       |   |      |

OR

| EPITYPE                                                                                       | ALLELES                         | P GROUP | HVR-A | HVR-B | HVR-C | HVR-D | HVR-E | HVR-F |
|-----------------------------------------------------------------------------------------------|---------------------------------|---------|-------|-------|-------|-------|-------|-------|
| <b>EDP687</b><br>1 rare                                                                       | DPB1* 687:01e                   | -       | LFQL  | EEFA  | AAE   | ILEEK | M     | GGPM  |
| <b>EDP1016</b><br>2 rare                                                                      | DPB1* 1016:01e / DPB1* 1138:01e | -       | LLQG  | EEFA  | AAE   | ILEEK | M     | GGPM  |
| <i>Both sides of this epitope require RARE alleles, review results to confirm assignment.</i> |                                 |         |       |       |       |       |       |       |

OR

| EPITYPE                                                                                       | ALLELES                         | P GROUP | HVR-A | HVR-B | HVR-C | HVR-D | HVR-E | HVR-F |
|-----------------------------------------------------------------------------------------------|---------------------------------|---------|-------|-------|-------|-------|-------|-------|
| <b>EDP427</b><br>1 rare                                                                       | DPB1* 427:01e                   | -       | LFQG  | EEFA  | ATE   | ILEEK | M     | GGPM  |
| <b>EDP1016</b><br>2 rare                                                                      | DPB1* 1016:01e / DPB1* 1138:01e | -       | LLQG  | EEFA  | AAE   | ILEEK | M     | GGPM  |
| <i>Both sides of this epitope require RARE alleles, review results to confirm assignment.</i> |                                 |         |       |       |       |       |       |       |

OR

| EPITYPE                                                                                       | ALLELES                         | P GROUP | HVR-A | HVR-B | HVR-C | HVR-D | HVR-E | HVR-F |
|-----------------------------------------------------------------------------------------------|---------------------------------|---------|-------|-------|-------|-------|-------|-------|
| <b>EDP867</b><br>1 rare                                                                       | DPB1* 867:01Ne                  | -       | LFQG  | EEFA  | CCG   | HPGGE | D     | GRAH  |
| <b>EDP1016</b><br>2 rare                                                                      | DPB1* 1016:01e / DPB1* 1138:01e | -       | LLQG  | EEFA  | AAE   | ILEEK | M     | GGPM  |
| <i>Both sides of this epitope require RARE alleles, review results to confirm assignment.</i> |                                 |         |       |       |       |       |       |       |

OR

| EPITYPE | ALLELES | P GROUP | HVR-A | HVR-B | HVR-C | HVR-D | HVR-E | HVR-F |
|---------|---------|---------|-------|-------|-------|-------|-------|-------|
|---------|---------|---------|-------|-------|-------|-------|-------|-------|

|                                                                                               |                                 |   |      |      |     |       |   |      |
|-----------------------------------------------------------------------------------------------|---------------------------------|---|------|------|-----|-------|---|------|
| <b>EDP177</b><br>1 rare                                                                       | DPB1* 177:01e                   | - | LFQG | EEFA | AAE | ILEEK | M | SGPM |
| <b>EDP1016</b><br>2 rare                                                                      | DPB1* 1016:01e / DPB1* 1138:01e | - | LLQG | EEFA | AAE | ILEEK | M | GGPM |
| <i>Both sides of this epitope require RARE alleles, review results to confirm assignment.</i> |                                 |   |      |      |     |       |   |      |

OR

| EPITYPE                                                                                       | ALLELES                         | P GROUP | HVR-A | HVR-B | HVR-C | HVR-D | HVR-E | HVR-F |
|-----------------------------------------------------------------------------------------------|---------------------------------|---------|-------|-------|-------|-------|-------|-------|
| <b>EDP747</b><br>1 rare                                                                       | DPB1* 747:01e                   | -       | VFQG  | EEFA  | AAE   | ILEEK | M     | GGPM  |
| <b>EDP1016</b><br>2 rare                                                                      | DPB1* 1016:01e / DPB1* 1138:01e | -       | LLQG  | EEFA  | AAE   | ILEEK | M     | GGPM  |
| <i>Both sides of this epitope require RARE alleles, review results to confirm assignment.</i> |                                 |         |       |       |       |       |       |       |

OR

| EPITYPE                                                                                       | ALLELES                         | P GROUP | HVR-A | HVR-B | HVR-C | HVR-D | HVR-E | HVR-F |
|-----------------------------------------------------------------------------------------------|---------------------------------|---------|-------|-------|-------|-------|-------|-------|
| <b>EDP1016</b><br>2 rare                                                                      | DPB1* 1016:01e / DPB1* 1138:01e | -       | LLQG  | EEFA  | AAE   | ILEEK | M     | GGPM  |
| <b>EDP1122</b><br>1 rare                                                                      | DPB1* 1122:01e                  | -       | LFQG  | EECA  | AAE   | ILEEK | M     | GGPM  |
| <i>Both sides of this epitope require RARE alleles, review results to confirm assignment.</i> |                                 |         |       |       |       |       |       |       |

OR

| EPITYPE                                                                                       | ALLELES                         | P GROUP | HVR-A | HVR-B | HVR-C | HVR-D | HVR-E | HVR-F |
|-----------------------------------------------------------------------------------------------|---------------------------------|---------|-------|-------|-------|-------|-------|-------|
| <b>EDP280</b><br>1 rare                                                                       | DPB1* 280:01e                   | -       | LFQG  | EEFA  | AAE   | ILEEK | M     | GAPM  |
| <b>EDP1016</b><br>2 rare                                                                      | DPB1* 1016:01e / DPB1* 1138:01e | -       | LLQG  | EEFA  | AAE   | ILEEK | M     | GGPM  |
| <i>Both sides of this epitope require RARE alleles, review results to confirm assignment.</i> |                                 |         |       |       |       |       |       |       |

OR

| EPITYPE | ALLELES | P GROUP | HVR-A | HVR-B | HVR-C | HVR-D | HVR-E | HVR-F |
|---------|---------|---------|-------|-------|-------|-------|-------|-------|
|---------|---------|---------|-------|-------|-------|-------|-------|-------|

|                                                                                               |                                 |   |      |      |     |       |   |      |
|-----------------------------------------------------------------------------------------------|---------------------------------|---|------|------|-----|-------|---|------|
| <b>EDP230</b><br>1 rare                                                                       | DPB1* 230:01e                   | - | LFQG | EEFA | AAE | ILEEK | M | GWPM |
| <b>EDP1016</b><br>2 rare                                                                      | DPB1* 1016:01e / DPB1* 1138:01e | - | LLQG | EEFA | AAE | ILEEK | M | GGPM |
| <i>Both sides of this epitype require RARE alleles, review results to confirm assignment.</i> |                                 |   |      |      |     |       |   |      |

OR

| EPITYPE                                                                                       | ALLELES                         | P GROUP | HVR-A | HVR-B | HVR-C | HVR-D | HVR-E | HVR-F |
|-----------------------------------------------------------------------------------------------|---------------------------------|---------|-------|-------|-------|-------|-------|-------|
| <b>EDP570</b><br>1 rare                                                                       | DPB1* 911:01Ne                  | -       | -     | -     | -     | -     | -     | -     |
| <b>EDP1016</b><br>2 rare                                                                      | DPB1* 1016:01e / DPB1* 1138:01e | -       | LLQG  | EEFA  | AAE   | ILEEK | M     | GGPM  |
| <i>Both sides of this epitype require RARE alleles, review results to confirm assignment.</i> |                                 |         |       |       |       |       |       |       |

OR

| EPITYPE                                                                                       | ALLELES                         | P GROUP | HVR-A | HVR-B | HVR-C | HVR-D | HVR-E | HVR-F |
|-----------------------------------------------------------------------------------------------|---------------------------------|---------|-------|-------|-------|-------|-------|-------|
| <b>EDP840</b><br>1 rare                                                                       | DPB1* 840:01e                   | -       | IFQG  | EEFA  | AAE   | ILEEK | M     | GGPM  |
| <b>EDP1016</b><br>2 rare                                                                      | DPB1* 1016:01e / DPB1* 1138:01e | -       | LLQG  | EEFA  | AAE   | ILEEK | M     | GGPM  |
| <i>Both sides of this epitype require RARE alleles, review results to confirm assignment.</i> |                                 |         |       |       |       |       |       |       |

OR

| EPITYPE                                                                                       | ALLELES                      | P GROUP | HVR-A | HVR-B | HVR-C | HVR-D | HVR-E | HVR-F |
|-----------------------------------------------------------------------------------------------|------------------------------|---------|-------|-------|-------|-------|-------|-------|
| <b>EDP279</b><br>2 rare                                                                       | DPB1* 279:01:01e, 279:01:02e | 279:01P | LFQG  | EEFA  | AAE   | ILEEK | M     | GRPM  |
| <b>EDP399</b><br>1 rare                                                                       | DPB1* 399:01e                | -       | LFQG  | EEFA  | AAE   | IVEEK | M     | GGPM  |
| <i>Both sides of this epitype require RARE alleles, review results to confirm assignment.</i> |                              |         |       |       |       |       |       |       |

OR

| EPITYPE | ALLELES | P GROUP | HVR-A | HVR-B | HVR-C | HVR-D | HVR-E | HVR-F |
|---------|---------|---------|-------|-------|-------|-------|-------|-------|
|---------|---------|---------|-------|-------|-------|-------|-------|-------|

|                                                                                               |                              |         |      |      |     |       |   |      |
|-----------------------------------------------------------------------------------------------|------------------------------|---------|------|------|-----|-------|---|------|
| <b>EDP279</b><br>2 rare                                                                       | DPB1* 279:01:01e, 279:01:02e | 279:01P | LFQG | EEFA | AAE | ILEEK | M | GRPM |
| <b>EDP319</b><br>1 rare                                                                       | DPB1* 319:01e                | -       | LFQG | EEFA | AAE | IQEEK | M | GGPM |
| <i>Both sides of this epitype require RARE alleles, review results to confirm assignment.</i> |                              |         |      |      |     |       |   |      |

OR

| EPITYPE                                                                                       | ALLELES                      | P GROUP | HVR-A | HVR-B | HVR-C | HVR-D | HVR-E | HVR-F |
|-----------------------------------------------------------------------------------------------|------------------------------|---------|-------|-------|-------|-------|-------|-------|
| <b>EDP179</b><br>1 rare                                                                       | DPB1* 179:01e                | -       | LFQG  | EEFA  | AAE   | LLEER | M     | GGPM  |
| <b>EDP279</b><br>2 rare                                                                       | DPB1* 279:01:01e, 279:01:02e | 279:01P | LFQG  | EEFA  | AAE   | ILEEK | M     | GRPM  |
| <i>Both sides of this epitype require RARE alleles, review results to confirm assignment.</i> |                              |         |       |       |       |       |       |       |

OR

| EPITYPE                                                                                       | ALLELES                      | P GROUP | HVR-A | HVR-B | HVR-C | HVR-D | HVR-E | HVR-F |
|-----------------------------------------------------------------------------------------------|------------------------------|---------|-------|-------|-------|-------|-------|-------|
| <b>EDP279</b><br>2 rare                                                                       | DPB1* 279:01:01e, 279:01:02e | 279:01P | LFQG  | EEFA  | AAE   | ILEEK | M     | GRPM  |
| <b>EDP679</b><br>1 rare                                                                       | DPB1* 679:01e                | -       | PFQG  | EEFA  | AAE   | ILEEK | M     | GGPM  |
| <i>Both sides of this epitype require RARE alleles, review results to confirm assignment.</i> |                              |         |       |       |       |       |       |       |

OR

| EPITYPE                                                                                       | ALLELES                      | P GROUP | HVR-A | HVR-B | HVR-C | HVR-D | HVR-E | HVR-F |
|-----------------------------------------------------------------------------------------------|------------------------------|---------|-------|-------|-------|-------|-------|-------|
| <b>EDP279</b><br>2 rare                                                                       | DPB1* 279:01:01e, 279:01:02e | 279:01P | LFQG  | EEFA  | AAE   | ILEEK | M     | GRPM  |
| <b>EDP592</b><br>1 rare                                                                       | DPB1* 592:01e                | -       | LFQG  | EEFA  | AAE   | ILEEK | M     | GGPR  |
| <i>Both sides of this epitype require RARE alleles, review results to confirm assignment.</i> |                              |         |       |       |       |       |       |       |

OR

| EPITYPE | ALLELES | P GROUP | HVR-A | HVR-B | HVR-C | HVR-D | HVR-E | HVR-F |
|---------|---------|---------|-------|-------|-------|-------|-------|-------|
|---------|---------|---------|-------|-------|-------|-------|-------|-------|



|                                                                                               |                              |         |      |      |     |       |   |      |
|-----------------------------------------------------------------------------------------------|------------------------------|---------|------|------|-----|-------|---|------|
| <b>EDP279</b><br>2 rare                                                                       | DPB1* 279:01:01e, 279:01:02e | 279:01P | LFQG | EEFA | AAE | ILEEK | M | GRPM |
| <b>EDP972</b><br>1 rare                                                                       | DPB1* 972:01e                | -       | LFQG | GEFV | AAE | ILEEK | M | GGPM |
| <i>Both sides of this epitope require RARE alleles, review results to confirm assignment.</i> |                              |         |      |      |     |       |   |      |

OR

| EPITYPE                                                                                       | ALLELES                      | P GROUP | HVR-A | HVR-B | HVR-C | HVR-D | HVR-E | HVR-F |
|-----------------------------------------------------------------------------------------------|------------------------------|---------|-------|-------|-------|-------|-------|-------|
| <b>EDP279</b><br>2 rare                                                                       | DPB1* 279:01:01e, 279:01:02e | 279:01P | LFQG  | EEFA  | AAE   | ILEEK | M     | GRPM  |
| <b>EDP642</b><br>1 rare                                                                       | DPB1* 642:01e                | -       | LFQG  | EEFA  | DAE   | ILEEK | M     | GGPM  |
| <i>Both sides of this epitope require RARE alleles, review results to confirm assignment.</i> |                              |         |       |       |       |       |       |       |

OR

| EPITYPE                                                                                       | ALLELES                      | P GROUP | HVR-A | HVR-B | HVR-C | HVR-D | HVR-E | HVR-F |
|-----------------------------------------------------------------------------------------------|------------------------------|---------|-------|-------|-------|-------|-------|-------|
| <b>EDP279</b><br>2 rare                                                                       | DPB1* 279:01:01e, 279:01:02e | 279:01P | LFQG  | EEFA  | AAE   | ILEEK | M     | GRPM  |
| <b>EDP1081</b><br>1 rare                                                                      | DPB1* 1081:01e               | -       | LFQG  | EEFA  | AAE   | VLEEK | M     | GGPM  |
| <i>Both sides of this epitope require RARE alleles, review results to confirm assignment.</i> |                              |         |       |       |       |       |       |       |

OR

| EPITYPE                                                                                       | ALLELES                      | P GROUP | HVR-A | HVR-B | HVR-C | HVR-D | HVR-E | HVR-F |
|-----------------------------------------------------------------------------------------------|------------------------------|---------|-------|-------|-------|-------|-------|-------|
| <b>EDP279</b><br>2 rare                                                                       | DPB1* 279:01:01e, 279:01:02e | 279:01P | LFQG  | EEFA  | AAE   | ILEEK | M     | GRPM  |
| <b>EDP1135</b><br>1 rare                                                                      | DPB1* 1135:01Ne              | -       | LFQG  | EEFA  | AAE   | ILGGE | D     | GRAH  |
| <i>Both sides of this epitope require RARE alleles, review results to confirm assignment.</i> |                              |         |       |       |       |       |       |       |

OR

| EPITYPE | ALLELES | P GROUP | HVR-A | HVR-B | HVR-C | HVR-D | HVR-E | HVR-F |
|---------|---------|---------|-------|-------|-------|-------|-------|-------|
|---------|---------|---------|-------|-------|-------|-------|-------|-------|

|                                                                                               |                              |         |      |      |     |       |   |      |
|-----------------------------------------------------------------------------------------------|------------------------------|---------|------|------|-----|-------|---|------|
| <b>EDP279</b><br>2 rare                                                                       | DPB1* 279:01:01e, 279:01:02e | 279:01P | LFQG | EEFA | AAE | ILEEK | M | GRPM |
| <b>EDP687</b><br>1 rare                                                                       | DPB1* 687:01e                | -       | LFQL | EEFA | AAE | ILEEK | M | GGPM |
| <i>Both sides of this epitype require RARE alleles, review results to confirm assignment.</i> |                              |         |      |      |     |       |   |      |

OR

| EPITYPE                                                                                       | ALLELES                      | P GROUP | HVR-A | HVR-B | HVR-C | HVR-D | HVR-E | HVR-F |
|-----------------------------------------------------------------------------------------------|------------------------------|---------|-------|-------|-------|-------|-------|-------|
| <b>EDP279</b><br>2 rare                                                                       | DPB1* 279:01:01e, 279:01:02e | 279:01P | LFQG  | EEFA  | AAE   | ILEEK | M     | GRPM  |
| <b>EDP427</b><br>1 rare                                                                       | DPB1* 427:01e                | -       | LFQG  | EEFA  | ATE   | ILEEK | M     | GGPM  |
| <i>Both sides of this epitype require RARE alleles, review results to confirm assignment.</i> |                              |         |       |       |       |       |       |       |

OR

| EPITYPE                                                                                       | ALLELES                      | P GROUP | HVR-A | HVR-B | HVR-C | HVR-D | HVR-E | HVR-F |
|-----------------------------------------------------------------------------------------------|------------------------------|---------|-------|-------|-------|-------|-------|-------|
| <b>EDP279</b><br>2 rare                                                                       | DPB1* 279:01:01e, 279:01:02e | 279:01P | LFQG  | EEFA  | AAE   | ILEEK | M     | GRPM  |
| <b>EDP867</b><br>1 rare                                                                       | DPB1* 867:01Ne               | -       | LFQG  | EEFA  | CCG   | HPGGE | D     | GRAH  |
| <i>Both sides of this epitype require RARE alleles, review results to confirm assignment.</i> |                              |         |       |       |       |       |       |       |

OR

| EPITYPE                                                                                       | ALLELES                      | P GROUP | HVR-A | HVR-B | HVR-C | HVR-D | HVR-E | HVR-F |
|-----------------------------------------------------------------------------------------------|------------------------------|---------|-------|-------|-------|-------|-------|-------|
| <b>EDP177</b><br>1 rare                                                                       | DPB1* 177:01e                | -       | LFQG  | EEFA  | AAE   | ILEEK | M     | SGPM  |
| <b>EDP279</b><br>2 rare                                                                       | DPB1* 279:01:01e, 279:01:02e | 279:01P | LFQG  | EEFA  | AAE   | ILEEK | M     | GRPM  |
| <i>Both sides of this epitype require RARE alleles, review results to confirm assignment.</i> |                              |         |       |       |       |       |       |       |

OR

| EPITYPE | ALLELES | P GROUP | HVR-A | HVR-B | HVR-C | HVR-D | HVR-E | HVR-F |
|---------|---------|---------|-------|-------|-------|-------|-------|-------|
|---------|---------|---------|-------|-------|-------|-------|-------|-------|

|                                                                                               |                              |         |      |      |     |       |   |      |
|-----------------------------------------------------------------------------------------------|------------------------------|---------|------|------|-----|-------|---|------|
| <b>EDP279</b><br>2 rare                                                                       | DPB1* 279:01:01e, 279:01:02e | 279:01P | LFQG | EEFA | AAE | ILEEK | M | GRPM |
| <b>EDP747</b><br>1 rare                                                                       | DPB1* 747:01e                | -       | VFQG | EEFA | AAE | ILEEK | M | GGPM |
| <i>Both sides of this epitope require RARE alleles, review results to confirm assignment.</i> |                              |         |      |      |     |       |   |      |

OR

| EPITYPE                                                                                       | ALLELES                      | P GROUP | HVR-A | HVR-B | HVR-C | HVR-D | HVR-E | HVR-F |
|-----------------------------------------------------------------------------------------------|------------------------------|---------|-------|-------|-------|-------|-------|-------|
| <b>EDP279</b><br>2 rare                                                                       | DPB1* 279:01:01e, 279:01:02e | 279:01P | LFQG  | EEFA  | AAE   | ILEEK | M     | GRPM  |
| <b>EDP1122</b><br>1 rare                                                                      | DPB1* 1122:01e               | -       | LFQG  | EECA  | AAE   | ILEEK | M     | GGPM  |
| <i>Both sides of this epitope require RARE alleles, review results to confirm assignment.</i> |                              |         |       |       |       |       |       |       |

OR

| EPITYPE                                                                                       | ALLELES                      | P GROUP | HVR-A | HVR-B | HVR-C | HVR-D | HVR-E | HVR-F |
|-----------------------------------------------------------------------------------------------|------------------------------|---------|-------|-------|-------|-------|-------|-------|
| <b>EDP279</b><br>2 rare                                                                       | DPB1* 279:01:01e, 279:01:02e | 279:01P | LFQG  | EEFA  | AAE   | ILEEK | M     | GRPM  |
| <b>EDP280</b><br>1 rare                                                                       | DPB1* 280:01e                | -       | LFQG  | EEFA  | AAE   | ILEEK | M     | GAPM  |
| <i>Both sides of this epitope require RARE alleles, review results to confirm assignment.</i> |                              |         |       |       |       |       |       |       |

OR

| EPITYPE                                                                                       | ALLELES                      | P GROUP | HVR-A | HVR-B | HVR-C | HVR-D | HVR-E | HVR-F |
|-----------------------------------------------------------------------------------------------|------------------------------|---------|-------|-------|-------|-------|-------|-------|
| <b>EDP230</b><br>1 rare                                                                       | DPB1* 230:01e                | -       | LFQG  | EEFA  | AAE   | ILEEK | M     | GWPM  |
| <b>EDP279</b><br>2 rare                                                                       | DPB1* 279:01:01e, 279:01:02e | 279:01P | LFQG  | EEFA  | AAE   | ILEEK | M     | GRPM  |
| <i>Both sides of this epitope require RARE alleles, review results to confirm assignment.</i> |                              |         |       |       |       |       |       |       |

OR

| EPITYPE | ALLELES | P GROUP | HVR-A | HVR-B | HVR-C | HVR-D | HVR-E | HVR-F |
|---------|---------|---------|-------|-------|-------|-------|-------|-------|
|---------|---------|---------|-------|-------|-------|-------|-------|-------|

|                                                                                               |                              |         |      |      |     |       |   |      |
|-----------------------------------------------------------------------------------------------|------------------------------|---------|------|------|-----|-------|---|------|
| <b>EDP279</b><br>2 rare                                                                       | DPB1* 279:01:01e, 279:01:02e | 279:01P | LFQG | EEFA | AAE | ILEEK | M | GRPM |
| <b>EDP570</b><br>1 rare                                                                       | DPB1* 911:01Ne               | -       | -    | -    | -   | -     | - | -    |
| <i>Both sides of this epitope require RARE alleles, review results to confirm assignment.</i> |                              |         |      |      |     |       |   |      |

OR

| EPITYPE                                                                                       | ALLELES                      | P GROUP | HVR-A | HVR-B | HVR-C | HVR-D | HVR-E | HVR-F |
|-----------------------------------------------------------------------------------------------|------------------------------|---------|-------|-------|-------|-------|-------|-------|
| <b>EDP279</b><br>2 rare                                                                       | DPB1* 279:01:01e, 279:01:02e | 279:01P | LFQG  | EEFA  | AAE   | ILEEK | M     | GRPM  |
| <b>EDP840</b><br>1 rare                                                                       | DPB1* 840:01e                | -       | IFQG  | EEFA  | AAE   | ILEEK | M     | GGPM  |
| <i>Both sides of this epitope require RARE alleles, review results to confirm assignment.</i> |                              |         |       |       |       |       |       |       |

OR

| EPITYPE                                                                                       | ALLELES                         | P GROUP | HVR-A | HVR-B | HVR-C | HVR-D | HVR-E | HVR-F |
|-----------------------------------------------------------------------------------------------|---------------------------------|---------|-------|-------|-------|-------|-------|-------|
| <b>EDP828</b><br>1 rare                                                                       | DPB1* 828:01e                   | -       | LFQG  | DEFA  | AAE   | ILEEK | M     | GGPM  |
| <b>EDP1016</b><br>2 rare                                                                      | DPB1* 1016:01e / DPB1* 1138:01e | -       | LLQG  | EEFA  | AAE   | ILEEK | M     | GGPM  |
| <i>Both sides of this epitope require RARE alleles, review results to confirm assignment.</i> |                                 |         |       |       |       |       |       |       |

OR

| EPITYPE                                                                                       | ALLELES                      | P GROUP | HVR-A | HVR-B | HVR-C | HVR-D | HVR-E | HVR-F |
|-----------------------------------------------------------------------------------------------|------------------------------|---------|-------|-------|-------|-------|-------|-------|
| <b>EDP279</b><br>2 rare                                                                       | DPB1* 279:01:01e, 279:01:02e | 279:01P | LFQG  | EEFA  | AAE   | ILEEK | M     | GRPM  |
| <b>EDP828</b><br>1 rare                                                                       | DPB1* 828:01e                | -       | LFQG  | DEFA  | AAE   | ILEEK | M     | GGPM  |
| <i>Both sides of this epitope require RARE alleles, review results to confirm assignment.</i> |                              |         |       |       |       |       |       |       |

OR

| EPITYPE | ALLELES | P GROUP | HVR-A | HVR-B | HVR-C | HVR-D | HVR-E | HVR-F |
|---------|---------|---------|-------|-------|-------|-------|-------|-------|
|---------|---------|---------|-------|-------|-------|-------|-------|-------|

|                                                                                               |                                 |   |      |      |     |       |   |      |
|-----------------------------------------------------------------------------------------------|---------------------------------|---|------|------|-----|-------|---|------|
| <b>EDP318</b><br>1 rare                                                                       | DPB1* 318:01e                   | - | LFQG | EEFT | AAE | ILEEK | M | GGPM |
| <b>EDP1016</b><br>2 rare                                                                      | DPB1* 1016:01e / DPB1* 1138:01e | - | LLQG | EEFA | AAE | ILEEK | M | GGPM |
| <i>Both sides of this epitope require RARE alleles, review results to confirm assignment.</i> |                                 |   |      |      |     |       |   |      |

OR

| EPITYPE                                                                                       | ALLELES                      | P GROUP | HVR-A | HVR-B | HVR-C | HVR-D | HVR-E | HVR-F |
|-----------------------------------------------------------------------------------------------|------------------------------|---------|-------|-------|-------|-------|-------|-------|
| <b>EDP279</b><br>2 rare                                                                       | DPB1* 279:01:01e, 279:01:02e | 279:01P | LFQG  | EEFA  | AAE   | ILEEK | M     | GRPM  |
| <b>EDP318</b><br>1 rare                                                                       | DPB1* 318:01e                | -       | LFQG  | EEFT  | AAE   | ILEEK | M     | GGPM  |
| <i>Both sides of this epitope require RARE alleles, review results to confirm assignment.</i> |                              |         |       |       |       |       |       |       |

OR

| EPITYPE                                                                                       | ALLELES                         | P GROUP | HVR-A | HVR-B | HVR-C | HVR-D | HVR-E | HVR-F |
|-----------------------------------------------------------------------------------------------|---------------------------------|---------|-------|-------|-------|-------|-------|-------|
| <b>EDP178</b><br>1 rare                                                                       | DPB1* 178:01e                   | -       | LFQG  | EEFA  | AAE   | ILEEK | M     | GGPV  |
| <b>EDP1016</b><br>2 rare                                                                      | DPB1* 1016:01e / DPB1* 1138:01e | -       | LLQG  | EEFA  | AAE   | ILEEK | M     | GGPM  |
| <i>Both sides of this epitope require RARE alleles, review results to confirm assignment.</i> |                                 |         |       |       |       |       |       |       |

OR

| EPITYPE                                                                                       | ALLELES                      | P GROUP | HVR-A | HVR-B | HVR-C | HVR-D | HVR-E | HVR-F |
|-----------------------------------------------------------------------------------------------|------------------------------|---------|-------|-------|-------|-------|-------|-------|
| <b>EDP178</b><br>1 rare                                                                       | DPB1* 178:01e                | -       | LFQG  | EEFA  | AAE   | ILEEK | M     | GGPV  |
| <b>EDP279</b><br>2 rare                                                                       | DPB1* 279:01:01e, 279:01:02e | 279:01P | LFQG  | EEFA  | AAE   | ILEEK | M     | GRPM  |
| <i>Both sides of this epitope require RARE alleles, review results to confirm assignment.</i> |                              |         |       |       |       |       |       |       |

OR

| EPITYPE | ALLELES | P GROUP | HVR-A | HVR-B | HVR-C | HVR-D | HVR-E | HVR-F |
|---------|---------|---------|-------|-------|-------|-------|-------|-------|
|---------|---------|---------|-------|-------|-------|-------|-------|-------|

|                                                                                               |                                 |   |      |      |     |       |   |      |
|-----------------------------------------------------------------------------------------------|---------------------------------|---|------|------|-----|-------|---|------|
| <b>EDP278</b><br>1 rare                                                                       | DPB1* 278:01e                   | - | LFQG | EEFA | AAE | ILEEK | I | GGPM |
| <b>EDP1016</b><br>2 rare                                                                      | DPB1* 1016:01e / DPB1* 1138:01e | - | LLQG | EEFA | AAE | ILEEK | M | GGPM |
| <i>Both sides of this epitype require RARE alleles, review results to confirm assignment.</i> |                                 |   |      |      |     |       |   |      |

OR

| EPITYPE                                                                                       | ALLELES                      | P GROUP | HVR-A | HVR-B | HVR-C | HVR-D | HVR-E | HVR-F |
|-----------------------------------------------------------------------------------------------|------------------------------|---------|-------|-------|-------|-------|-------|-------|
| <b>EDP278</b><br>1 rare                                                                       | DPB1* 278:01e                | -       | LFQG  | EEFA  | AAE   | ILEEK | I     | GGPM  |
| <b>EDP279</b><br>2 rare                                                                       | DPB1* 279:01:01e, 279:01:02e | 279:01P | LFQG  | EEFA  | AAE   | ILEEK | M     | GRPM  |
| <i>Both sides of this epitype require RARE alleles, review results to confirm assignment.</i> |                              |         |       |       |       |       |       |       |

OR

| EPITYPE                                                                                       | ALLELES                         | P GROUP | HVR-A | HVR-B | HVR-C | HVR-D | HVR-E | HVR-F |
|-----------------------------------------------------------------------------------------------|---------------------------------|---------|-------|-------|-------|-------|-------|-------|
| <b>EDP875</b><br>1 rare                                                                       | DPB1* 875:01Ne                  | -       | FSRD  | RSSR  | -     | -     | -     | -     |
| <b>EDP1016</b><br>2 rare                                                                      | DPB1* 1016:01e / DPB1* 1138:01e | -       | LLQG  | EEFA  | AAE   | ILEEK | M     | GGPM  |
| <i>Both sides of this epitype require RARE alleles, review results to confirm assignment.</i> |                                 |         |       |       |       |       |       |       |

OR

| EPITYPE                                                                                       | ALLELES                      | P GROUP | HVR-A | HVR-B | HVR-C | HVR-D | HVR-E | HVR-F |
|-----------------------------------------------------------------------------------------------|------------------------------|---------|-------|-------|-------|-------|-------|-------|
| <b>EDP279</b><br>2 rare                                                                       | DPB1* 279:01:01e, 279:01:02e | 279:01P | LFQG  | EEFA  | AAE   | ILEEK | M     | GRPM  |
| <b>EDP875</b><br>1 rare                                                                       | DPB1* 875:01Ne               | -       | FSRD  | RSSR  | -     | -     | -     | -     |
| <i>Both sides of this epitype require RARE alleles, review results to confirm assignment.</i> |                              |         |       |       |       |       |       |       |

OR

| EPITYPE | ALLELES | P GROUP | HVR-A | HVR-B | HVR-C | HVR-D | HVR-E | HVR-F |
|---------|---------|---------|-------|-------|-------|-------|-------|-------|
|---------|---------|---------|-------|-------|-------|-------|-------|-------|

|                                                                                               |                                 |   |      |      |     |       |   |      |
|-----------------------------------------------------------------------------------------------|---------------------------------|---|------|------|-----|-------|---|------|
| <b>EDP375</b><br>1 rare                                                                       | DPB1* 375:01e                   | - | LFQG | QEFA | AAE | ILEEK | M | GGPM |
| <b>EDP1016</b><br>2 rare                                                                      | DPB1* 1016:01e / DPB1* 1138:01e | - | LLQG | EEFA | AAE | ILEEK | M | GGPM |
| <i>Both sides of this epitype require RARE alleles, review results to confirm assignment.</i> |                                 |   |      |      |     |       |   |      |

OR

| EPITYPE                                                                                       | ALLELES                      | P GROUP | HVR-A | HVR-B | HVR-C | HVR-D | HVR-E | HVR-F |
|-----------------------------------------------------------------------------------------------|------------------------------|---------|-------|-------|-------|-------|-------|-------|
| <b>EDP279</b><br>2 rare                                                                       | DPB1* 279:01:01e, 279:01:02e | 279:01P | LFQG  | EEFA  | AAE   | ILEEK | M     | GRPM  |
| <b>EDP375</b><br>1 rare                                                                       | DPB1* 375:01e                | -       | LFQG  | QEFA  | AAE   | ILEEK | M     | GGPM  |
| <i>Both sides of this epitype require RARE alleles, review results to confirm assignment.</i> |                              |         |       |       |       |       |       |       |

OR

| EPITYPE                                                                                       | ALLELES                         | P GROUP | HVR-A | HVR-B | HVR-C | HVR-D | HVR-E | HVR-F |
|-----------------------------------------------------------------------------------------------|---------------------------------|---------|-------|-------|-------|-------|-------|-------|
| <b>EDP686</b><br>1 rare                                                                       | DPB1* 686:01e                   | -       | LFQG  | EGFA  | AAE   | ILEEK | M     | GGPM  |
| <b>EDP1016</b><br>2 rare                                                                      | DPB1* 1016:01e / DPB1* 1138:01e | -       | LLQG  | EEFA  | AAE   | ILEEK | M     | GGPM  |
| <i>Both sides of this epitype require RARE alleles, review results to confirm assignment.</i> |                                 |         |       |       |       |       |       |       |

OR

| EPITYPE                                                                                       | ALLELES                      | P GROUP | HVR-A | HVR-B | HVR-C | HVR-D | HVR-E | HVR-F |
|-----------------------------------------------------------------------------------------------|------------------------------|---------|-------|-------|-------|-------|-------|-------|
| <b>EDP279</b><br>2 rare                                                                       | DPB1* 279:01:01e, 279:01:02e | 279:01P | LFQG  | EEFA  | AAE   | ILEEK | M     | GRPM  |
| <b>EDP686</b><br>1 rare                                                                       | DPB1* 686:01e                | -       | LFQG  | EGFA  | AAE   | ILEEK | M     | GGPM  |
| <i>Both sides of this epitype require RARE alleles, review results to confirm assignment.</i> |                              |         |       |       |       |       |       |       |

OR

| EPITYPE | ALLELES | P GROUP | HVR-A | HVR-B | HVR-C | HVR-D | HVR-E | HVR-F |
|---------|---------|---------|-------|-------|-------|-------|-------|-------|
|---------|---------|---------|-------|-------|-------|-------|-------|-------|

|                                                                                               |                                 |   |      |      |     |       |   |      |
|-----------------------------------------------------------------------------------------------|---------------------------------|---|------|------|-----|-------|---|------|
| <b>EDP176</b><br>1 rare                                                                       | DPB1* 176:01e                   | - | LFQG | EEFA | AAE | ILKEK | M | GGPM |
| <b>EDP1016</b><br>2 rare                                                                      | DPB1* 1016:01e / DPB1* 1138:01e | - | LLQG | EEFA | AAE | ILEEK | M | GGPM |
| <i>Both sides of this epitype require RARE alleles, review results to confirm assignment.</i> |                                 |   |      |      |     |       |   |      |

OR

| EPITYPE                                                                                       | ALLELES                      | P GROUP | HVR-A | HVR-B | HVR-C | HVR-D | HVR-E | HVR-F |
|-----------------------------------------------------------------------------------------------|------------------------------|---------|-------|-------|-------|-------|-------|-------|
| <b>EDP176</b><br>1 rare                                                                       | DPB1* 176:01e                | -       | LFQG  | EEFA  | AAE   | ILKEK | M     | GGPM  |
| <b>EDP279</b><br>2 rare                                                                       | DPB1* 279:01:01e, 279:01:02e | 279:01P | LFQG  | EEFA  | AAE   | ILEEK | M     | GRPM  |
| <i>Both sides of this epitype require RARE alleles, review results to confirm assignment.</i> |                              |         |       |       |       |       |       |       |

OR

| EPITYPE                                                                                       | ALLELES                         | P GROUP | HVR-A | HVR-B | HVR-C | HVR-D | HVR-E | HVR-F |
|-----------------------------------------------------------------------------------------------|---------------------------------|---------|-------|-------|-------|-------|-------|-------|
| <b>EDP456</b><br>1 rare                                                                       | DPB1* 456:01e                   | -       | LFQG  | EEFA  | AAE   | ILEVK | M     | GGPM  |
| <b>EDP1016</b><br>2 rare                                                                      | DPB1* 1016:01e / DPB1* 1138:01e | -       | LLQG  | EEFA  | AAE   | ILEEK | M     | GGPM  |
| <i>Both sides of this epitype require RARE alleles, review results to confirm assignment.</i> |                                 |         |       |       |       |       |       |       |

OR

| EPITYPE                                                                                       | ALLELES                      | P GROUP | HVR-A | HVR-B | HVR-C | HVR-D | HVR-E | HVR-F |
|-----------------------------------------------------------------------------------------------|------------------------------|---------|-------|-------|-------|-------|-------|-------|
| <b>EDP279</b><br>2 rare                                                                       | DPB1* 279:01:01e, 279:01:02e | 279:01P | LFQG  | EEFA  | AAE   | ILEEK | M     | GRPM  |
| <b>EDP456</b><br>1 rare                                                                       | DPB1* 456:01e                | -       | LFQG  | EEFA  | AAE   | ILEVK | M     | GGPM  |
| <i>Both sides of this epitype require RARE alleles, review results to confirm assignment.</i> |                              |         |       |       |       |       |       |       |

OR

| EPITYPE | ALLELES | P GROUP | HVR-A | HVR-B | HVR-C | HVR-D | HVR-E | HVR-F |
|---------|---------|---------|-------|-------|-------|-------|-------|-------|
|---------|---------|---------|-------|-------|-------|-------|-------|-------|



|                                                                                               |                                 |   |      |      |     |       |   |      |
|-----------------------------------------------------------------------------------------------|---------------------------------|---|------|------|-----|-------|---|------|
| <b>EDP1016</b><br>2 rare                                                                      | DPB1* 1016:01e / DPB1* 1138:01e | - | LLQG | EEFA | AAE | ILEEK | M | GGPM |
| <b>EDP1097</b><br>1 rare                                                                      | DPB1* 1097:01e                  | - | LFLG | EEFA | AAE | ILEEK | M | GGPM |
| <i>Both sides of this epitope require RARE alleles, review results to confirm assignment.</i> |                                 |   |      |      |     |       |   |      |

OR

| EPITYPE                                                                                       | ALLELES                      | P GROUP | HVR-A | HVR-B | HVR-C | HVR-D | HVR-E | HVR-F |
|-----------------------------------------------------------------------------------------------|------------------------------|---------|-------|-------|-------|-------|-------|-------|
| <b>EDP279</b><br>2 rare                                                                       | DPB1* 279:01:01e, 279:01:02e | 279:01P | LFQG  | EEFA  | AAE   | ILEEK | M     | GRPM  |
| <b>EDP1097</b><br>1 rare                                                                      | DPB1* 1097:01e               | -       | LFLG  | EEFA  | AAE   | ILEEK | M     | GGPM  |
| <i>Both sides of this epitope require RARE alleles, review results to confirm assignment.</i> |                              |         |       |       |       |       |       |       |

OR

| EPITYPE                                                                                       | ALLELES                         | P GROUP | HVR-A | HVR-B | HVR-C | HVR-D | HVR-E | HVR-F |
|-----------------------------------------------------------------------------------------------|---------------------------------|---------|-------|-------|-------|-------|-------|-------|
| <b>EDP303</b><br>1 rare                                                                       | DPB1* 303:01e                   | -       | LFQG  | EEFA  | AAE   | ILEER | M     | GGPM  |
| <b>EDP1016</b><br>2 rare                                                                      | DPB1* 1016:01e / DPB1* 1138:01e | -       | LLQG  | EEFA  | AAE   | ILEEK | M     | GGPM  |
| <i>Both sides of this epitope require RARE alleles, review results to confirm assignment.</i> |                                 |         |       |       |       |       |       |       |

OR

| EPITYPE                                                                                       | ALLELES                      | P GROUP | HVR-A | HVR-B | HVR-C | HVR-D | HVR-E | HVR-F |
|-----------------------------------------------------------------------------------------------|------------------------------|---------|-------|-------|-------|-------|-------|-------|
| <b>EDP279</b><br>2 rare                                                                       | DPB1* 279:01:01e, 279:01:02e | 279:01P | LFQG  | EEFA  | AAE   | ILEEK | M     | GRPM  |
| <b>EDP303</b><br>1 rare                                                                       | DPB1* 303:01e                | -       | LFQG  | EEFA  | AAE   | ILEER | M     | GGPM  |
| <i>Both sides of this epitope require RARE alleles, review results to confirm assignment.</i> |                              |         |       |       |       |       |       |       |

OR

| EPITYPE | ALLELES | P GROUP | HVR-A | HVR-B | HVR-C | HVR-D | HVR-E | HVR-F |
|---------|---------|---------|-------|-------|-------|-------|-------|-------|
|---------|---------|---------|-------|-------|-------|-------|-------|-------|

|                                                                                               |                                 |   |      |      |     |       |   |      |
|-----------------------------------------------------------------------------------------------|---------------------------------|---|------|------|-----|-------|---|------|
| <b>EDP753</b><br>1 rare                                                                       | DPB1* 753:01e                   | - | FFQG | EEFA | AAE | ILEEK | M | GGPM |
| <b>EDP1016</b><br>2 rare                                                                      | DPB1* 1016:01e / DPB1* 1138:01e | - | LLQG | EEFA | AAE | ILEEK | M | GGPM |
| <i>Both sides of this epitype require RARE alleles, review results to confirm assignment.</i> |                                 |   |      |      |     |       |   |      |

OR

| EPITYPE                                                                                       | ALLELES                      | P GROUP | HVR-A | HVR-B | HVR-C | HVR-D | HVR-E | HVR-F |
|-----------------------------------------------------------------------------------------------|------------------------------|---------|-------|-------|-------|-------|-------|-------|
| <b>EDP279</b><br>2 rare                                                                       | DPB1* 279:01:01e, 279:01:02e | 279:01P | LFQG  | EEFA  | AAE   | ILEEK | M     | GRPM  |
| <b>EDP753</b><br>1 rare                                                                       | DPB1* 753:01e                | -       | FFQG  | EEFA  | AAE   | ILEEK | M     | GGPM  |
| <i>Both sides of this epitype require RARE alleles, review results to confirm assignment.</i> |                              |         |       |       |       |       |       |       |

OR

| EPITYPE                                                                                       | ALLELES                         | P GROUP | HVR-A | HVR-B | HVR-C | HVR-D | HVR-E | HVR-F |
|-----------------------------------------------------------------------------------------------|---------------------------------|---------|-------|-------|-------|-------|-------|-------|
| <b>EDP934</b><br>1 rare                                                                       | DPB1* 934:01Qe                  | -       | LFQG  | EEFA  | AAE   | ILEEK | M     | GGPM  |
| <b>EDP1016</b><br>2 rare                                                                      | DPB1* 1016:01e / DPB1* 1138:01e | -       | LLQG  | EEFA  | AAE   | ILEEK | M     | GGPM  |
| <i>Both sides of this epitype require RARE alleles, review results to confirm assignment.</i> |                                 |         |       |       |       |       |       |       |

OR

| EPITYPE                                                                                       | ALLELES                      | P GROUP | HVR-A | HVR-B | HVR-C | HVR-D | HVR-E | HVR-F |
|-----------------------------------------------------------------------------------------------|------------------------------|---------|-------|-------|-------|-------|-------|-------|
| <b>EDP279</b><br>2 rare                                                                       | DPB1* 279:01:01e, 279:01:02e | 279:01P | LFQG  | EEFA  | AAE   | ILEEK | M     | GRPM  |
| <b>EDP934</b><br>1 rare                                                                       | DPB1* 934:01Qe               | -       | LFQG  | EEFA  | AAE   | ILEEK | M     | GGPM  |
| <i>Both sides of this epitype require RARE alleles, review results to confirm assignment.</i> |                              |         |       |       |       |       |       |       |

OR

| EPITYPE | ALLELES | P GROUP | HVR-A | HVR-B | HVR-C | HVR-D | HVR-E | HVR-F |
|---------|---------|---------|-------|-------|-------|-------|-------|-------|
|---------|---------|---------|-------|-------|-------|-------|-------|-------|

|                                                                                               |                                 |   |      |      |     |       |   |      |
|-----------------------------------------------------------------------------------------------|---------------------------------|---|------|------|-----|-------|---|------|
| <b>EDP874</b><br>1 rare                                                                       | DPB1* 874:01Ne                  | - | LFQG | EEFA | AAE | ILEEK | C | -    |
| <b>EDP1016</b><br>2 rare                                                                      | DPB1* 1016:01e / DPB1* 1138:01e | - | LLQG | EEFA | AAE | ILEEK | M | GGPM |
| <i>Both sides of this epitope require RARE alleles, review results to confirm assignment.</i> |                                 |   |      |      |     |       |   |      |

OR

| EPITYPE                                                                                       | ALLELES                      | P GROUP | HVR-A | HVR-B | HVR-C | HVR-D | HVR-E | HVR-F |
|-----------------------------------------------------------------------------------------------|------------------------------|---------|-------|-------|-------|-------|-------|-------|
| <b>EDP279</b><br>2 rare                                                                       | DPB1* 279:01:01e, 279:01:02e | 279:01P | LFQG  | EEFA  | AAE   | ILEEK | M     | GRPM  |
| <b>EDP874</b><br>1 rare                                                                       | DPB1* 874:01Ne               | -       | LFQG  | EEFA  | AAE   | ILEEK | C     | -     |
| <i>Both sides of this epitope require RARE alleles, review results to confirm assignment.</i> |                              |         |       |       |       |       |       |       |

OR

| EPITYPE                                                                                       | ALLELES                         | P GROUP | HVR-A | HVR-B | HVR-C | HVR-D | HVR-E | HVR-F |
|-----------------------------------------------------------------------------------------------|---------------------------------|---------|-------|-------|-------|-------|-------|-------|
| <b>EDP254</b><br>1 rare                                                                       | DPB1* 254:01e                   | -       | LFQG  | EEFA  | AVE   | ILEEK | M     | GGPM  |
| <b>EDP1016</b><br>2 rare                                                                      | DPB1* 1016:01e / DPB1* 1138:01e | -       | LLQG  | EEFA  | AAE   | ILEEK | M     | GGPM  |
| <i>Both sides of this epitope require RARE alleles, review results to confirm assignment.</i> |                                 |         |       |       |       |       |       |       |

OR

| EPITYPE                                                                                       | ALLELES                      | P GROUP | HVR-A | HVR-B | HVR-C | HVR-D | HVR-E | HVR-F |
|-----------------------------------------------------------------------------------------------|------------------------------|---------|-------|-------|-------|-------|-------|-------|
| <b>EDP254</b><br>1 rare                                                                       | DPB1* 254:01e                | -       | LFQG  | EEFA  | AVE   | ILEEK | M     | GGPM  |
| <b>EDP279</b><br>2 rare                                                                       | DPB1* 279:01:01e, 279:01:02e | 279:01P | LFQG  | EEFA  | AAE   | ILEEK | M     | GRPM  |
| <i>Both sides of this epitope require RARE alleles, review results to confirm assignment.</i> |                              |         |       |       |       |       |       |       |

OR

| EPITYPE | ALLELES | P GROUP | HVR-A | HVR-B | HVR-C | HVR-D | HVR-E | HVR-F |
|---------|---------|---------|-------|-------|-------|-------|-------|-------|
|---------|---------|---------|-------|-------|-------|-------|-------|-------|

|                                                                                               |                                 |   |      |      |     |       |   |      |
|-----------------------------------------------------------------------------------------------|---------------------------------|---|------|------|-----|-------|---|------|
| <b>EDP454</b><br>1 rare                                                                       | DPB1* 454:01e                   | - | LFQG | EEFA | AAE | ILEEK | M | GEPM |
| <b>EDP1016</b><br>2 rare                                                                      | DPB1* 1016:01e / DPB1* 1138:01e | - | LLQG | EEFA | AAE | ILEEK | M | GGPM |
| <i>Both sides of this epitype require RARE alleles, review results to confirm assignment.</i> |                                 |   |      |      |     |       |   |      |

OR

| EPITYPE                                                                                       | ALLELES                      | P GROUP | HVR-A | HVR-B | HVR-C | HVR-D | HVR-E | HVR-F |
|-----------------------------------------------------------------------------------------------|------------------------------|---------|-------|-------|-------|-------|-------|-------|
| <b>EDP279</b><br>2 rare                                                                       | DPB1* 279:01:01e, 279:01:02e | 279:01P | LFQG  | EEFA  | AAE   | ILEEK | M     | GRPM  |
| <b>EDP454</b><br>1 rare                                                                       | DPB1* 454:01e                | -       | LFQG  | EEFA  | AAE   | ILEEK | M     | GEPM  |
| <i>Both sides of this epitype require RARE alleles, review results to confirm assignment.</i> |                              |         |       |       |       |       |       |       |

OR

| EPITYPE                                                                                       | ALLELES                         | P GROUP | HVR-A | HVR-B | HVR-C | HVR-D | HVR-E | HVR-F |
|-----------------------------------------------------------------------------------------------|---------------------------------|---------|-------|-------|-------|-------|-------|-------|
| <b>EDP1016</b><br>2 rare                                                                      | DPB1* 1016:01e / DPB1* 1138:01e | -       | LLQG  | EEFA  | AAE   | ILEEK | M     | GGPM  |
| <b>EDP1046</b><br>1 rare                                                                      | DPB1* 1046:01e                  | -       | LFQG  | EEIA  | AAE   | ILEEK | M     | GGPM  |
| <i>Both sides of this epitype require RARE alleles, review results to confirm assignment.</i> |                                 |         |       |       |       |       |       |       |

OR

| EPITYPE                                                                                       | ALLELES                      | P GROUP | HVR-A | HVR-B | HVR-C | HVR-D | HVR-E | HVR-F |
|-----------------------------------------------------------------------------------------------|------------------------------|---------|-------|-------|-------|-------|-------|-------|
| <b>EDP279</b><br>2 rare                                                                       | DPB1* 279:01:01e, 279:01:02e | 279:01P | LFQG  | EEFA  | AAE   | ILEEK | M     | GRPM  |
| <b>EDP1046</b><br>1 rare                                                                      | DPB1* 1046:01e               | -       | LFQG  | EEIA  | AAE   | ILEEK | M     | GGPM  |
| <i>Both sides of this epitype require RARE alleles, review results to confirm assignment.</i> |                              |         |       |       |       |       |       |       |

OR

| EPITYPE | ALLELES | P GROUP | HVR-A | HVR-B | HVR-C | HVR-D | HVR-E | HVR-F |
|---------|---------|---------|-------|-------|-------|-------|-------|-------|
|---------|---------|---------|-------|-------|-------|-------|-------|-------|

|                                                                                               |                                 |   |      |      |     |       |   |      |
|-----------------------------------------------------------------------------------------------|---------------------------------|---|------|------|-----|-------|---|------|
| <b>EDP921</b><br>1 rare                                                                       | DPB1* 921:01e                   | - | LFQG | GEFA | AAE | ILEEK | M | GGPM |
| <b>EDP1016</b><br>2 rare                                                                      | DPB1* 1016:01e / DPB1* 1138:01e | - | LLQG | EEFA | AAE | ILEEK | M | GGPM |
| <i>Both sides of this epitope require RARE alleles, review results to confirm assignment.</i> |                                 |   |      |      |     |       |   |      |

OR

| EPITYPE                                                                                       | ALLELES                      | P GROUP | HVR-A | HVR-B | HVR-C | HVR-D | HVR-E | HVR-F |
|-----------------------------------------------------------------------------------------------|------------------------------|---------|-------|-------|-------|-------|-------|-------|
| <b>EDP279</b><br>2 rare                                                                       | DPB1* 279:01:01e, 279:01:02e | 279:01P | LFQG  | EEFA  | AAE   | ILEEK | M     | GRPM  |
| <b>EDP921</b><br>1 rare                                                                       | DPB1* 921:01e                | -       | LFQG  | GEFA  | AAE   | ILEEK | M     | GGPM  |
| <i>Both sides of this epitope require RARE alleles, review results to confirm assignment.</i> |                              |         |       |       |       |       |       |       |

OR

| EPITYPE                                                                                       | ALLELES                         | P GROUP | HVR-A | HVR-B | HVR-C | HVR-D | HVR-E | HVR-F |
|-----------------------------------------------------------------------------------------------|---------------------------------|---------|-------|-------|-------|-------|-------|-------|
| <b>EDP871</b><br>1 rare                                                                       | DPB1* 871:01Ne                  | -       | LFQG  | EEFA  | AAE   | HPGGE | D     | GRAH  |
| <b>EDP1016</b><br>2 rare                                                                      | DPB1* 1016:01e / DPB1* 1138:01e | -       | LLQG  | EEFA  | AAE   | ILEEK | M     | GGPM  |
| <i>Both sides of this epitope require RARE alleles, review results to confirm assignment.</i> |                                 |         |       |       |       |       |       |       |

OR

| EPITYPE                                                                                       | ALLELES                      | P GROUP | HVR-A | HVR-B | HVR-C | HVR-D | HVR-E | HVR-F |
|-----------------------------------------------------------------------------------------------|------------------------------|---------|-------|-------|-------|-------|-------|-------|
| <b>EDP279</b><br>2 rare                                                                       | DPB1* 279:01:01e, 279:01:02e | 279:01P | LFQG  | EEFA  | AAE   | ILEEK | M     | GRPM  |
| <b>EDP871</b><br>1 rare                                                                       | DPB1* 871:01Ne               | -       | LFQG  | EEFA  | AAE   | HPGGE | D     | GRAH  |
| <i>Both sides of this epitope require RARE alleles, review results to confirm assignment.</i> |                              |         |       |       |       |       |       |       |

OR

| EPITYPE | ALLELES | P GROUP | HVR-A | HVR-B | HVR-C | HVR-D | HVR-E | HVR-F |
|---------|---------|---------|-------|-------|-------|-------|-------|-------|
|---------|---------|---------|-------|-------|-------|-------|-------|-------|

|                                                                                               |                |   |      |      |     |       |   |      |
|-----------------------------------------------------------------------------------------------|----------------|---|------|------|-----|-------|---|------|
| <b>EDP679</b><br>1 rare                                                                       | DPB1* 679:01e  | - | PFQG | EEFA | AAE | ILEEK | M | GGPM |
| <b>EDP871</b><br>1 rare                                                                       | DPB1* 871:01Ne | - | LFQG | EEFA | AAE | HPGGE | D | GRAH |
| <i>Both sides of this epitope require RARE alleles, review results to confirm assignment.</i> |                |   |      |      |     |       |   |      |

OR

| EPITYPE                                                                                       | ALLELES        | P GROUP | HVR-A | HVR-B | HVR-C | HVR-D | HVR-E | HVR-F |
|-----------------------------------------------------------------------------------------------|----------------|---------|-------|-------|-------|-------|-------|-------|
| <b>EDP592</b><br>1 rare                                                                       | DPB1* 592:01e  | -       | LFQG  | EEFA  | AAE   | ILEEK | M     | GGPR  |
| <b>EDP871</b><br>1 rare                                                                       | DPB1* 871:01Ne | -       | LFQG  | EEFA  | AAE   | HPGGE | D     | GRAH  |
| <i>Both sides of this epitope require RARE alleles, review results to confirm assignment.</i> |                |         |       |       |       |       |       |       |

OR

| EPITYPE                                                                                       | ALLELES        | P GROUP | HVR-A | HVR-B | HVR-C | HVR-D | HVR-E | HVR-F |
|-----------------------------------------------------------------------------------------------|----------------|---------|-------|-------|-------|-------|-------|-------|
| <b>EDP871</b><br>1 rare                                                                       | DPB1* 871:01Ne | -       | LFQG  | EEFA  | AAE   | HPGGE | D     | GRAH  |
| <b>EDP972</b><br>1 rare                                                                       | DPB1* 972:01e  | -       | LFQG  | GEFV  | AAE   | ILEEK | M     | GGPM  |
| <i>Both sides of this epitope require RARE alleles, review results to confirm assignment.</i> |                |         |       |       |       |       |       |       |

OR

| EPITYPE                                                                                       | ALLELES        | P GROUP | HVR-A | HVR-B | HVR-C | HVR-D | HVR-E | HVR-F |
|-----------------------------------------------------------------------------------------------|----------------|---------|-------|-------|-------|-------|-------|-------|
| <b>EDP642</b><br>1 rare                                                                       | DPB1* 642:01e  | -       | LFQG  | EEFA  | DAE   | ILEEK | M     | GGPM  |
| <b>EDP871</b><br>1 rare                                                                       | DPB1* 871:01Ne | -       | LFQG  | EEFA  | AAE   | HPGGE | D     | GRAH  |
| <i>Both sides of this epitope require RARE alleles, review results to confirm assignment.</i> |                |         |       |       |       |       |       |       |

OR

| EPITYPE | ALLELES | P GROUP | HVR-A | HVR-B | HVR-C | HVR-D | HVR-E | HVR-F |
|---------|---------|---------|-------|-------|-------|-------|-------|-------|
|---------|---------|---------|-------|-------|-------|-------|-------|-------|

|                                                                                               |                |   |      |      |     |       |   |      |
|-----------------------------------------------------------------------------------------------|----------------|---|------|------|-----|-------|---|------|
| <b>EDP871</b><br>1 rare                                                                       | DPB1* 871:01Ne | - | LFQG | EEFA | AAE | HPGGE | D | GRAH |
| <b>EDP1081</b><br>1 rare                                                                      | DPB1* 1081:01e | - | LFQG | EEFA | AAE | VLEEK | M | GGPM |
| <i>Both sides of this epitype require RARE alleles, review results to confirm assignment.</i> |                |   |      |      |     |       |   |      |

OR

| EPITYPE                                                                                       | ALLELES         | P GROUP | HVR-A | HVR-B | HVR-C | HVR-D | HVR-E | HVR-F |
|-----------------------------------------------------------------------------------------------|-----------------|---------|-------|-------|-------|-------|-------|-------|
| <b>EDP871</b><br>1 rare                                                                       | DPB1* 871:01Ne  | -       | LFQG  | EEFA  | AAE   | HPGGE | D     | GRAH  |
| <b>EDP1135</b><br>1 rare                                                                      | DPB1* 1135:01Ne | -       | LFQG  | EEFA  | AAE   | ILGGE | D     | GRAH  |
| <i>Both sides of this epitype require RARE alleles, review results to confirm assignment.</i> |                 |         |       |       |       |       |       |       |

OR

| EPITYPE                                                                                       | ALLELES        | P GROUP | HVR-A | HVR-B | HVR-C | HVR-D | HVR-E | HVR-F |
|-----------------------------------------------------------------------------------------------|----------------|---------|-------|-------|-------|-------|-------|-------|
| <b>EDP687</b><br>1 rare                                                                       | DPB1* 687:01e  | -       | LFQL  | EEFA  | AAE   | ILEEK | M     | GGPM  |
| <b>EDP871</b><br>1 rare                                                                       | DPB1* 871:01Ne | -       | LFQG  | EEFA  | AAE   | HPGGE | D     | GRAH  |
| <i>Both sides of this epitype require RARE alleles, review results to confirm assignment.</i> |                |         |       |       |       |       |       |       |

OR

| EPITYPE                                                                                       | ALLELES        | P GROUP | HVR-A | HVR-B | HVR-C | HVR-D | HVR-E | HVR-F |
|-----------------------------------------------------------------------------------------------|----------------|---------|-------|-------|-------|-------|-------|-------|
| <b>EDP427</b><br>1 rare                                                                       | DPB1* 427:01e  | -       | LFQG  | EEFA  | ATE   | ILEEK | M     | GGPM  |
| <b>EDP871</b><br>1 rare                                                                       | DPB1* 871:01Ne | -       | LFQG  | EEFA  | AAE   | HPGGE | D     | GRAH  |
| <i>Both sides of this epitype require RARE alleles, review results to confirm assignment.</i> |                |         |       |       |       |       |       |       |

OR

| EPITYPE | ALLELES | P GROUP | HVR-A | HVR-B | HVR-C | HVR-D | HVR-E | HVR-F |
|---------|---------|---------|-------|-------|-------|-------|-------|-------|
|---------|---------|---------|-------|-------|-------|-------|-------|-------|

|                                                                                               |                |   |      |      |     |       |   |      |
|-----------------------------------------------------------------------------------------------|----------------|---|------|------|-----|-------|---|------|
| <b>EDP867</b><br>1 rare                                                                       | DPB1* 867:01Ne | - | LFQG | EEFA | CCG | HPGGE | D | GRAH |
| <b>EDP871</b><br>1 rare                                                                       | DPB1* 871:01Ne | - | LFQG | EEFA | AAE | HPGGE | D | GRAH |
| <i>Both sides of this epitype require RARE alleles, review results to confirm assignment.</i> |                |   |      |      |     |       |   |      |

OR

| EPITYPE                                                                                       | ALLELES        | P GROUP | HVR-A | HVR-B | HVR-C | HVR-D | HVR-E | HVR-F |
|-----------------------------------------------------------------------------------------------|----------------|---------|-------|-------|-------|-------|-------|-------|
| <b>EDP177</b><br>1 rare                                                                       | DPB1* 177:01e  | -       | LFQG  | EEFA  | AAE   | ILEEK | M     | SGPM  |
| <b>EDP871</b><br>1 rare                                                                       | DPB1* 871:01Ne | -       | LFQG  | EEFA  | AAE   | HPGGE | D     | GRAH  |
| <i>Both sides of this epitype require RARE alleles, review results to confirm assignment.</i> |                |         |       |       |       |       |       |       |

OR

| EPITYPE                                                                                       | ALLELES        | P GROUP | HVR-A | HVR-B | HVR-C | HVR-D | HVR-E | HVR-F |
|-----------------------------------------------------------------------------------------------|----------------|---------|-------|-------|-------|-------|-------|-------|
| <b>EDP747</b><br>1 rare                                                                       | DPB1* 747:01e  | -       | VFQG  | EEFA  | AAE   | ILEEK | M     | GGPM  |
| <b>EDP871</b><br>1 rare                                                                       | DPB1* 871:01Ne | -       | LFQG  | EEFA  | AAE   | HPGGE | D     | GRAH  |
| <i>Both sides of this epitype require RARE alleles, review results to confirm assignment.</i> |                |         |       |       |       |       |       |       |

OR

| EPITYPE                                                                                       | ALLELES        | P GROUP | HVR-A | HVR-B | HVR-C | HVR-D | HVR-E | HVR-F |
|-----------------------------------------------------------------------------------------------|----------------|---------|-------|-------|-------|-------|-------|-------|
| <b>EDP871</b><br>1 rare                                                                       | DPB1* 871:01Ne | -       | LFQG  | EEFA  | AAE   | HPGGE | D     | GRAH  |
| <b>EDP1122</b><br>1 rare                                                                      | DPB1* 1122:01e | -       | LFQG  | EECA  | AAE   | ILEEK | M     | GGPM  |
| <i>Both sides of this epitype require RARE alleles, review results to confirm assignment.</i> |                |         |       |       |       |       |       |       |

OR

| EPITYPE | ALLELES | P GROUP | HVR-A | HVR-B | HVR-C | HVR-D | HVR-E | HVR-F |
|---------|---------|---------|-------|-------|-------|-------|-------|-------|
|---------|---------|---------|-------|-------|-------|-------|-------|-------|



|                                                                                               |                |   |      |      |     |              |          |             |
|-----------------------------------------------------------------------------------------------|----------------|---|------|------|-----|--------------|----------|-------------|
| <b>EDP280</b><br>1 rare                                                                       | DPB1* 280:01e  | - | LFQG | EEFA | AAE | ILEEK        | M        | <b>GAPM</b> |
| <b>EDP871</b><br>1 rare                                                                       | DPB1* 871:01Ne | - | LFQG | EEFA | AAE | <b>HPGGE</b> | <b>D</b> | <b>GRAH</b> |
| <i>Both sides of this epitype require RARE alleles, review results to confirm assignment.</i> |                |   |      |      |     |              |          |             |

OR

| EPITYPE                                                                                       | ALLELES        | P GROUP | HVR-A | HVR-B | HVR-C | HVR-D        | HVR-E    | HVR-F       |
|-----------------------------------------------------------------------------------------------|----------------|---------|-------|-------|-------|--------------|----------|-------------|
| <b>EDP230</b><br>1 rare                                                                       | DPB1* 230:01e  | -       | LFQG  | EEFA  | AAE   | ILEEK        | M        | <b>GWPM</b> |
| <b>EDP871</b><br>1 rare                                                                       | DPB1* 871:01Ne | -       | LFQG  | EEFA  | AAE   | <b>HPGGE</b> | <b>D</b> | <b>GRAH</b> |
| <i>Both sides of this epitype require RARE alleles, review results to confirm assignment.</i> |                |         |       |       |       |              |          |             |

OR

| EPITYPE                                                                                       | ALLELES        | P GROUP | HVR-A | HVR-B | HVR-C | HVR-D        | HVR-E    | HVR-F       |
|-----------------------------------------------------------------------------------------------|----------------|---------|-------|-------|-------|--------------|----------|-------------|
| <b>EDP570</b><br>1 rare                                                                       | DPB1* 911:01Ne | -       | -     | -     | -     | -            | -        | -           |
| <b>EDP871</b><br>1 rare                                                                       | DPB1* 871:01Ne | -       | LFQG  | EEFA  | AAE   | <b>HPGGE</b> | <b>D</b> | <b>GRAH</b> |
| <i>Both sides of this epitype require RARE alleles, review results to confirm assignment.</i> |                |         |       |       |       |              |          |             |

OR

| EPITYPE                                                                                       | ALLELES        | P GROUP | HVR-A       | HVR-B | HVR-C | HVR-D        | HVR-E    | HVR-F       |
|-----------------------------------------------------------------------------------------------|----------------|---------|-------------|-------|-------|--------------|----------|-------------|
| <b>EDP840</b><br>1 rare                                                                       | DPB1* 840:01e  | -       | <b>IFQG</b> | EEFA  | AAE   | ILEEK        | M        | GGPM        |
| <b>EDP871</b><br>1 rare                                                                       | DPB1* 871:01Ne | -       | LFQG        | EEFA  | AAE   | <b>HPGGE</b> | <b>D</b> | <b>GRAH</b> |
| <i>Both sides of this epitype require RARE alleles, review results to confirm assignment.</i> |                |         |             |       |       |              |          |             |

OR

| EPITYPE | ALLELES | P GROUP | HVR-A | HVR-B | HVR-C | HVR-D | HVR-E | HVR-F |
|---------|---------|---------|-------|-------|-------|-------|-------|-------|
|---------|---------|---------|-------|-------|-------|-------|-------|-------|

|                                                                                               |               |   |      |      |     |              |   |      |
|-----------------------------------------------------------------------------------------------|---------------|---|------|------|-----|--------------|---|------|
| <b>EDP319</b><br>1 rare                                                                       | DPB1* 319:01e | - | LFQG | EEFA | AAE | <b>IQEEK</b> | M | GGPM |
| <b>EDP399</b><br>1 rare                                                                       | DPB1* 399:01e | - | LFQG | EEFA | AAE | <b>IVEEK</b> | M | GGPM |
| <i>Both sides of this epitype require RARE alleles, review results to confirm assignment.</i> |               |   |      |      |     |              |   |      |

OR

| EPITYPE                                                                                       | ALLELES       | P GROUP | HVR-A | HVR-B | HVR-C | HVR-D        | HVR-E | HVR-F |
|-----------------------------------------------------------------------------------------------|---------------|---------|-------|-------|-------|--------------|-------|-------|
| <b>EDP179</b><br>1 rare                                                                       | DPB1* 179:01e | -       | LFQG  | EEFA  | AAE   | <b>LLEER</b> | M     | GGPM  |
| <b>EDP399</b><br>1 rare                                                                       | DPB1* 399:01e | -       | LFQG  | EEFA  | AAE   | <b>IVEEK</b> | M     | GGPM  |
| <i>Both sides of this epitype require RARE alleles, review results to confirm assignment.</i> |               |         |       |       |       |              |       |       |

OR

| EPITYPE                                                                                       | ALLELES       | P GROUP | HVR-A       | HVR-B | HVR-C | HVR-D        | HVR-E | HVR-F |
|-----------------------------------------------------------------------------------------------|---------------|---------|-------------|-------|-------|--------------|-------|-------|
| <b>EDP399</b><br>1 rare                                                                       | DPB1* 399:01e | -       | <b>LFQG</b> | EEFA  | AAE   | <b>IVEEK</b> | M     | GGPM  |
| <b>EDP679</b><br>1 rare                                                                       | DPB1* 679:01e | -       | <b>PFQG</b> | EEFA  | AAE   | <b>ILEEK</b> | M     | GGPM  |
| <i>Both sides of this epitype require RARE alleles, review results to confirm assignment.</i> |               |         |             |       |       |              |       |       |

OR

| EPITYPE                                                                                       | ALLELES       | P GROUP | HVR-A | HVR-B | HVR-C | HVR-D        | HVR-E | HVR-F       |
|-----------------------------------------------------------------------------------------------|---------------|---------|-------|-------|-------|--------------|-------|-------------|
| <b>EDP399</b><br>1 rare                                                                       | DPB1* 399:01e | -       | LFQG  | EEFA  | AAE   | <b>IVEEK</b> | M     | <b>GGPM</b> |
| <b>EDP592</b><br>1 rare                                                                       | DPB1* 592:01e | -       | LFQG  | EEFA  | AAE   | <b>ILEEK</b> | M     | <b>GGPR</b> |
| <i>Both sides of this epitype require RARE alleles, review results to confirm assignment.</i> |               |         |       |       |       |              |       |             |

OR

| EPITYPE | ALLELES | P GROUP | HVR-A | HVR-B | HVR-C | HVR-D | HVR-E | HVR-F |
|---------|---------|---------|-------|-------|-------|-------|-------|-------|
|---------|---------|---------|-------|-------|-------|-------|-------|-------|

|                                                                                               |               |   |      |      |     |       |   |      |
|-----------------------------------------------------------------------------------------------|---------------|---|------|------|-----|-------|---|------|
| <b>EDP399</b><br>1 rare                                                                       | DPB1* 399:01e | - | LFQG | EEFA | AAE | IVEEK | M | GGPM |
| <b>EDP972</b><br>1 rare                                                                       | DPB1* 972:01e | - | LFQG | GEFV | AAE | ILEEK | M | GGPM |
| <i>Both sides of this epitype require RARE alleles, review results to confirm assignment.</i> |               |   |      |      |     |       |   |      |

OR

| EPITYPE                                                                                       | ALLELES       | P GROUP | HVR-A | HVR-B | HVR-C | HVR-D | HVR-E | HVR-F |
|-----------------------------------------------------------------------------------------------|---------------|---------|-------|-------|-------|-------|-------|-------|
| <b>EDP399</b><br>1 rare                                                                       | DPB1* 399:01e | -       | LFQG  | EEFA  | AAE   | IVEEK | M     | GGPM  |
| <b>EDP642</b><br>1 rare                                                                       | DPB1* 642:01e | -       | LFQG  | EEFA  | DAE   | ILEEK | M     | GGPM  |
| <i>Both sides of this epitype require RARE alleles, review results to confirm assignment.</i> |               |         |       |       |       |       |       |       |

OR

| EPITYPE                                                                                       | ALLELES        | P GROUP | HVR-A | HVR-B | HVR-C | HVR-D | HVR-E | HVR-F |
|-----------------------------------------------------------------------------------------------|----------------|---------|-------|-------|-------|-------|-------|-------|
| <b>EDP399</b><br>1 rare                                                                       | DPB1* 399:01e  | -       | LFQG  | EEFA  | AAE   | IVEEK | M     | GGPM  |
| <b>EDP1081</b><br>1 rare                                                                      | DPB1* 1081:01e | -       | LFQG  | EEFA  | AAE   | VLEEK | M     | GGPM  |
| <i>Both sides of this epitype require RARE alleles, review results to confirm assignment.</i> |                |         |       |       |       |       |       |       |

OR

| EPITYPE                                                                                       | ALLELES         | P GROUP | HVR-A | HVR-B | HVR-C | HVR-D | HVR-E | HVR-F |
|-----------------------------------------------------------------------------------------------|-----------------|---------|-------|-------|-------|-------|-------|-------|
| <b>EDP399</b><br>1 rare                                                                       | DPB1* 399:01e   | -       | LFQG  | EEFA  | AAE   | IVEEK | M     | GGPM  |
| <b>EDP1135</b><br>1 rare                                                                      | DPB1* 1135:01Ne | -       | LFQG  | EEFA  | AAE   | ILGGE | D     | GRAH  |
| <i>Both sides of this epitype require RARE alleles, review results to confirm assignment.</i> |                 |         |       |       |       |       |       |       |

OR

| EPITYPE | ALLELES | P GROUP | HVR-A | HVR-B | HVR-C | HVR-D | HVR-E | HVR-F |
|---------|---------|---------|-------|-------|-------|-------|-------|-------|
|---------|---------|---------|-------|-------|-------|-------|-------|-------|

|                                                                                               |               |   |      |      |     |       |   |      |
|-----------------------------------------------------------------------------------------------|---------------|---|------|------|-----|-------|---|------|
| <b>EDP399</b><br>1 rare                                                                       | DPB1* 399:01e | - | LFQG | EEFA | AAE | IVEEK | M | GGPM |
| <b>EDP687</b><br>1 rare                                                                       | DPB1* 687:01e | - | LFQL | EEFA | AAE | ILEEK | M | GGPM |
| <i>Both sides of this epitype require RARE alleles, review results to confirm assignment.</i> |               |   |      |      |     |       |   |      |

OR

| EPITYPE                                                                                       | ALLELES       | P GROUP | HVR-A | HVR-B | HVR-C | HVR-D | HVR-E | HVR-F |
|-----------------------------------------------------------------------------------------------|---------------|---------|-------|-------|-------|-------|-------|-------|
| <b>EDP399</b><br>1 rare                                                                       | DPB1* 399:01e | -       | LFQG  | EEFA  | AAE   | IVEEK | M     | GGPM  |
| <b>EDP427</b><br>1 rare                                                                       | DPB1* 427:01e | -       | LFQG  | EEFA  | ATE   | ILEEK | M     | GGPM  |
| <i>Both sides of this epitype require RARE alleles, review results to confirm assignment.</i> |               |         |       |       |       |       |       |       |

OR

| EPITYPE                                                                                       | ALLELES        | P GROUP | HVR-A | HVR-B | HVR-C | HVR-D | HVR-E | HVR-F |
|-----------------------------------------------------------------------------------------------|----------------|---------|-------|-------|-------|-------|-------|-------|
| <b>EDP399</b><br>1 rare                                                                       | DPB1* 399:01e  | -       | LFQG  | EEFA  | AAE   | IVEEK | M     | GGPM  |
| <b>EDP867</b><br>1 rare                                                                       | DPB1* 867:01Ne | -       | LFQG  | EEFA  | CCG   | HPGGE | D     | GRAH  |
| <i>Both sides of this epitype require RARE alleles, review results to confirm assignment.</i> |                |         |       |       |       |       |       |       |

OR

| EPITYPE                                                                                       | ALLELES       | P GROUP | HVR-A | HVR-B | HVR-C | HVR-D | HVR-E | HVR-F |
|-----------------------------------------------------------------------------------------------|---------------|---------|-------|-------|-------|-------|-------|-------|
| <b>EDP177</b><br>1 rare                                                                       | DPB1* 177:01e | -       | LFQG  | EEFA  | AAE   | ILEEK | M     | SGPM  |
| <b>EDP399</b><br>1 rare                                                                       | DPB1* 399:01e | -       | LFQG  | EEFA  | AAE   | IVEEK | M     | GGPM  |
| <i>Both sides of this epitype require RARE alleles, review results to confirm assignment.</i> |               |         |       |       |       |       |       |       |

OR

| EPITYPE | ALLELES | P GROUP | HVR-A | HVR-B | HVR-C | HVR-D | HVR-E | HVR-F |
|---------|---------|---------|-------|-------|-------|-------|-------|-------|
|---------|---------|---------|-------|-------|-------|-------|-------|-------|

|                                                                                               |               |   |      |      |     |       |   |      |
|-----------------------------------------------------------------------------------------------|---------------|---|------|------|-----|-------|---|------|
| <b>EDP399</b><br>1 rare                                                                       | DPB1* 399:01e | - | LFQG | EEFA | AAE | IVEEK | M | GGPM |
| <b>EDP747</b><br>1 rare                                                                       | DPB1* 747:01e | - | VFQG | EEFA | AAE | ILEEK | M | GGPM |
| <i>Both sides of this epitype require RARE alleles, review results to confirm assignment.</i> |               |   |      |      |     |       |   |      |

OR

| EPITYPE                                                                                       | ALLELES        | P GROUP | HVR-A | HVR-B | HVR-C | HVR-D | HVR-E | HVR-F |
|-----------------------------------------------------------------------------------------------|----------------|---------|-------|-------|-------|-------|-------|-------|
| <b>EDP399</b><br>1 rare                                                                       | DPB1* 399:01e  | -       | LFQG  | EEFA  | AAE   | IVEEK | M     | GGPM  |
| <b>EDP1122</b><br>1 rare                                                                      | DPB1* 1122:01e | -       | LFQG  | EECA  | AAE   | ILEEK | M     | GGPM  |
| <i>Both sides of this epitype require RARE alleles, review results to confirm assignment.</i> |                |         |       |       |       |       |       |       |

OR

| EPITYPE                                                                                       | ALLELES       | P GROUP | HVR-A | HVR-B | HVR-C | HVR-D | HVR-E | HVR-F |
|-----------------------------------------------------------------------------------------------|---------------|---------|-------|-------|-------|-------|-------|-------|
| <b>EDP280</b><br>1 rare                                                                       | DPB1* 280:01e | -       | LFQG  | EEFA  | AAE   | ILEEK | M     | GAPM  |
| <b>EDP399</b><br>1 rare                                                                       | DPB1* 399:01e | -       | LFQG  | EEFA  | AAE   | IVEEK | M     | GGPM  |
| <i>Both sides of this epitype require RARE alleles, review results to confirm assignment.</i> |               |         |       |       |       |       |       |       |

OR

| EPITYPE                                                                                       | ALLELES       | P GROUP | HVR-A | HVR-B | HVR-C | HVR-D | HVR-E | HVR-F |
|-----------------------------------------------------------------------------------------------|---------------|---------|-------|-------|-------|-------|-------|-------|
| <b>EDP230</b><br>1 rare                                                                       | DPB1* 230:01e | -       | LFQG  | EEFA  | AAE   | ILEEK | M     | GWPM  |
| <b>EDP399</b><br>1 rare                                                                       | DPB1* 399:01e | -       | LFQG  | EEFA  | AAE   | IVEEK | M     | GGPM  |
| <i>Both sides of this epitype require RARE alleles, review results to confirm assignment.</i> |               |         |       |       |       |       |       |       |

OR

| EPITYPE | ALLELES | P GROUP | HVR-A | HVR-B | HVR-C | HVR-D | HVR-E | HVR-F |
|---------|---------|---------|-------|-------|-------|-------|-------|-------|
|---------|---------|---------|-------|-------|-------|-------|-------|-------|

|                                                                                               |                |   |      |      |     |       |   |      |
|-----------------------------------------------------------------------------------------------|----------------|---|------|------|-----|-------|---|------|
| <b>EDP399</b><br>1 rare                                                                       | DPB1* 399:01e  | - | LFQG | EEFA | AAE | IVEEK | M | GGPM |
| <b>EDP570</b><br>1 rare                                                                       | DPB1* 911:01Ne | - | -    | -    | -   | -     | - | -    |
| <i>Both sides of this epitype require RARE alleles, review results to confirm assignment.</i> |                |   |      |      |     |       |   |      |

OR

| EPITYPE                                                                                       | ALLELES       | P GROUP | HVR-A | HVR-B | HVR-C | HVR-D | HVR-E | HVR-F |
|-----------------------------------------------------------------------------------------------|---------------|---------|-------|-------|-------|-------|-------|-------|
| <b>EDP399</b><br>1 rare                                                                       | DPB1* 399:01e | -       | LFQG  | EEFA  | AAE   | IVEEK | M     | GGPM  |
| <b>EDP840</b><br>1 rare                                                                       | DPB1* 840:01e | -       | IFQG  | EEFA  | AAE   | ILEEK | M     | GGPM  |
| <i>Both sides of this epitype require RARE alleles, review results to confirm assignment.</i> |               |         |       |       |       |       |       |       |

OR

| EPITYPE                                                                                       | ALLELES       | P GROUP | HVR-A | HVR-B | HVR-C | HVR-D | HVR-E | HVR-F |
|-----------------------------------------------------------------------------------------------|---------------|---------|-------|-------|-------|-------|-------|-------|
| <b>EDP179</b><br>1 rare                                                                       | DPB1* 179:01e | -       | LFQG  | EEFA  | AAE   | LLEER | M     | GGPM  |
| <b>EDP319</b><br>1 rare                                                                       | DPB1* 319:01e | -       | LFQG  | EEFA  | AAE   | IQEEK | M     | GGPM  |
| <i>Both sides of this epitype require RARE alleles, review results to confirm assignment.</i> |               |         |       |       |       |       |       |       |

OR

| EPITYPE                                                                                       | ALLELES       | P GROUP | HVR-A | HVR-B | HVR-C | HVR-D | HVR-E | HVR-F |
|-----------------------------------------------------------------------------------------------|---------------|---------|-------|-------|-------|-------|-------|-------|
| <b>EDP319</b><br>1 rare                                                                       | DPB1* 319:01e | -       | LFQG  | EEFA  | AAE   | IQEEK | M     | GGPM  |
| <b>EDP679</b><br>1 rare                                                                       | DPB1* 679:01e | -       | PFQG  | EEFA  | AAE   | ILEEK | M     | GGPM  |
| <i>Both sides of this epitype require RARE alleles, review results to confirm assignment.</i> |               |         |       |       |       |       |       |       |

OR

| EPITYPE | ALLELES | P GROUP | HVR-A | HVR-B | HVR-C | HVR-D | HVR-E | HVR-F |
|---------|---------|---------|-------|-------|-------|-------|-------|-------|
|---------|---------|---------|-------|-------|-------|-------|-------|-------|

|                                                                                               |               |   |      |      |     |       |   |      |
|-----------------------------------------------------------------------------------------------|---------------|---|------|------|-----|-------|---|------|
| <b>EDP319</b><br>1 rare                                                                       | DPB1* 319:01e | - | LFQG | EEFA | AAE | IQEEK | M | GGPM |
| <b>EDP592</b><br>1 rare                                                                       | DPB1* 592:01e | - | LFQG | EEFA | AAE | ILEEK | M | GGPR |
| <i>Both sides of this epitype require RARE alleles, review results to confirm assignment.</i> |               |   |      |      |     |       |   |      |

OR

| EPITYPE                                                                                       | ALLELES       | P GROUP | HVR-A | HVR-B | HVR-C | HVR-D | HVR-E | HVR-F |
|-----------------------------------------------------------------------------------------------|---------------|---------|-------|-------|-------|-------|-------|-------|
| <b>EDP319</b><br>1 rare                                                                       | DPB1* 319:01e | -       | LFQG  | EEFA  | AAE   | IQEEK | M     | GGPM  |
| <b>EDP972</b><br>1 rare                                                                       | DPB1* 972:01e | -       | LFQG  | GEFV  | AAE   | ILEEK | M     | GGPM  |
| <i>Both sides of this epitype require RARE alleles, review results to confirm assignment.</i> |               |         |       |       |       |       |       |       |

OR

| EPITYPE                                                                                       | ALLELES       | P GROUP | HVR-A | HVR-B | HVR-C | HVR-D | HVR-E | HVR-F |
|-----------------------------------------------------------------------------------------------|---------------|---------|-------|-------|-------|-------|-------|-------|
| <b>EDP319</b><br>1 rare                                                                       | DPB1* 319:01e | -       | LFQG  | EEFA  | AAE   | IQEEK | M     | GGPM  |
| <b>EDP642</b><br>1 rare                                                                       | DPB1* 642:01e | -       | LFQG  | EEFA  | DAE   | ILEEK | M     | GGPM  |
| <i>Both sides of this epitype require RARE alleles, review results to confirm assignment.</i> |               |         |       |       |       |       |       |       |

OR

| EPITYPE                                                                                       | ALLELES        | P GROUP | HVR-A | HVR-B | HVR-C | HVR-D | HVR-E | HVR-F |
|-----------------------------------------------------------------------------------------------|----------------|---------|-------|-------|-------|-------|-------|-------|
| <b>EDP319</b><br>1 rare                                                                       | DPB1* 319:01e  | -       | LFQG  | EEFA  | AAE   | IQEEK | M     | GGPM  |
| <b>EDP1081</b><br>1 rare                                                                      | DPB1* 1081:01e | -       | LFQG  | EEFA  | AAE   | VLEEK | M     | GGPM  |
| <i>Both sides of this epitype require RARE alleles, review results to confirm assignment.</i> |                |         |       |       |       |       |       |       |

OR

| EPITYPE | ALLELES | P GROUP | HVR-A | HVR-B | HVR-C | HVR-D | HVR-E | HVR-F |
|---------|---------|---------|-------|-------|-------|-------|-------|-------|
|---------|---------|---------|-------|-------|-------|-------|-------|-------|

|                                                                                               |                 |   |      |      |     |              |          |             |
|-----------------------------------------------------------------------------------------------|-----------------|---|------|------|-----|--------------|----------|-------------|
| <b>EDP319</b><br>1 rare                                                                       | DPB1* 319:01e   | - | LFQG | EEFA | AAE | <b>IQEEK</b> | M        | GGPM        |
| <b>EDP1135</b><br>1 rare                                                                      | DPB1* 1135:01Ne | - | LFQG | EEFA | AAE | <b>ILGGE</b> | <b>D</b> | <b>GRAH</b> |
| <i>Both sides of this epitype require RARE alleles, review results to confirm assignment.</i> |                 |   |      |      |     |              |          |             |

OR

| EPITYPE                                                                                       | ALLELES       | P GROUP | HVR-A | HVR-B | HVR-C | HVR-D        | HVR-E | HVR-F |
|-----------------------------------------------------------------------------------------------|---------------|---------|-------|-------|-------|--------------|-------|-------|
| <b>EDP319</b><br>1 rare                                                                       | DPB1* 319:01e | -       | LFQG  | EEFA  | AAE   | <b>IQEEK</b> | M     | GGPM  |
| <b>EDP687</b><br>1 rare                                                                       | DPB1* 687:01e | -       | LFQL  | EEFA  | AAE   | <b>ILEEK</b> | M     | GGPM  |
| <i>Both sides of this epitype require RARE alleles, review results to confirm assignment.</i> |               |         |       |       |       |              |       |       |

OR

| EPITYPE                                                                                       | ALLELES       | P GROUP | HVR-A | HVR-B | HVR-C | HVR-D        | HVR-E | HVR-F |
|-----------------------------------------------------------------------------------------------|---------------|---------|-------|-------|-------|--------------|-------|-------|
| <b>EDP319</b><br>1 rare                                                                       | DPB1* 319:01e | -       | LFQG  | EEFA  | AAE   | <b>IQEEK</b> | M     | GGPM  |
| <b>EDP427</b><br>1 rare                                                                       | DPB1* 427:01e | -       | LFQG  | EEFA  | ATE   | <b>ILEEK</b> | M     | GGPM  |
| <i>Both sides of this epitype require RARE alleles, review results to confirm assignment.</i> |               |         |       |       |       |              |       |       |

OR

| EPITYPE                                                                                       | ALLELES        | P GROUP | HVR-A | HVR-B | HVR-C      | HVR-D        | HVR-E    | HVR-F       |
|-----------------------------------------------------------------------------------------------|----------------|---------|-------|-------|------------|--------------|----------|-------------|
| <b>EDP319</b><br>1 rare                                                                       | DPB1* 319:01e  | -       | LFQG  | EEFA  | AAE        | <b>IQEEK</b> | M        | GGPM        |
| <b>EDP867</b><br>1 rare                                                                       | DPB1* 867:01Ne | -       | LFQG  | EEFA  | <b>CCG</b> | <b>HPGGE</b> | <b>D</b> | <b>GRAH</b> |
| <i>Both sides of this epitype require RARE alleles, review results to confirm assignment.</i> |                |         |       |       |            |              |          |             |

OR

| EPITYPE | ALLELES | P GROUP | HVR-A | HVR-B | HVR-C | HVR-D | HVR-E | HVR-F |
|---------|---------|---------|-------|-------|-------|-------|-------|-------|
|---------|---------|---------|-------|-------|-------|-------|-------|-------|



|                                                                                               |               |   |      |      |     |       |   |      |
|-----------------------------------------------------------------------------------------------|---------------|---|------|------|-----|-------|---|------|
| <b>EDP177</b><br>1 rare                                                                       | DPB1* 177:01e | - | LFQG | EEFA | AAE | ILEEK | M | SGPM |
| <b>EDP319</b><br>1 rare                                                                       | DPB1* 319:01e | - | LFQG | EEFA | AAE | IQEEK | M | GGPM |
| <i>Both sides of this epitope require RARE alleles, review results to confirm assignment.</i> |               |   |      |      |     |       |   |      |

OR

| EPITYPE                                                                                       | ALLELES       | P GROUP | HVR-A | HVR-B | HVR-C | HVR-D | HVR-E | HVR-F |
|-----------------------------------------------------------------------------------------------|---------------|---------|-------|-------|-------|-------|-------|-------|
| <b>EDP319</b><br>1 rare                                                                       | DPB1* 319:01e | -       | LFQG  | EEFA  | AAE   | IQEEK | M     | GGPM  |
| <b>EDP747</b><br>1 rare                                                                       | DPB1* 747:01e | -       | VFQG  | EEFA  | AAE   | ILEEK | M     | GGPM  |
| <i>Both sides of this epitope require RARE alleles, review results to confirm assignment.</i> |               |         |       |       |       |       |       |       |

OR

| EPITYPE                                                                                       | ALLELES        | P GROUP | HVR-A | HVR-B | HVR-C | HVR-D | HVR-E | HVR-F |
|-----------------------------------------------------------------------------------------------|----------------|---------|-------|-------|-------|-------|-------|-------|
| <b>EDP319</b><br>1 rare                                                                       | DPB1* 319:01e  | -       | LFQG  | EEFA  | AAE   | IQEEK | M     | GGPM  |
| <b>EDP1122</b><br>1 rare                                                                      | DPB1* 1122:01e | -       | LFQG  | EECA  | AAE   | ILEEK | M     | GGPM  |
| <i>Both sides of this epitope require RARE alleles, review results to confirm assignment.</i> |                |         |       |       |       |       |       |       |

OR

| EPITYPE                                                                                       | ALLELES       | P GROUP | HVR-A | HVR-B | HVR-C | HVR-D | HVR-E | HVR-F |
|-----------------------------------------------------------------------------------------------|---------------|---------|-------|-------|-------|-------|-------|-------|
| <b>EDP280</b><br>1 rare                                                                       | DPB1* 280:01e | -       | LFQG  | EEFA  | AAE   | ILEEK | M     | GAPM  |
| <b>EDP319</b><br>1 rare                                                                       | DPB1* 319:01e | -       | LFQG  | EEFA  | AAE   | IQEEK | M     | GGPM  |
| <i>Both sides of this epitope require RARE alleles, review results to confirm assignment.</i> |               |         |       |       |       |       |       |       |

OR

| EPITYPE | ALLELES | P GROUP | HVR-A | HVR-B | HVR-C | HVR-D | HVR-E | HVR-F |
|---------|---------|---------|-------|-------|-------|-------|-------|-------|
|---------|---------|---------|-------|-------|-------|-------|-------|-------|

|                                                                                               |               |   |      |      |     |       |   |      |
|-----------------------------------------------------------------------------------------------|---------------|---|------|------|-----|-------|---|------|
| <b>EDP230</b><br>1 rare                                                                       | DPB1* 230:01e | - | LFQG | EEFA | AAE | ILEEK | M | GWPM |
| <b>EDP319</b><br>1 rare                                                                       | DPB1* 319:01e | - | LFQG | EEFA | AAE | IQEEK | M | GGPM |
| <i>Both sides of this epitype require RARE alleles, review results to confirm assignment.</i> |               |   |      |      |     |       |   |      |

OR

| EPITYPE                                                                                       | ALLELES        | P GROUP | HVR-A | HVR-B | HVR-C | HVR-D | HVR-E | HVR-F |
|-----------------------------------------------------------------------------------------------|----------------|---------|-------|-------|-------|-------|-------|-------|
| <b>EDP319</b><br>1 rare                                                                       | DPB1* 319:01e  | -       | LFQG  | EEFA  | AAE   | IQEEK | M     | GGPM  |
| <b>EDP570</b><br>1 rare                                                                       | DPB1* 911:01Ne | -       | -     | -     | -     | -     | -     | -     |
| <i>Both sides of this epitype require RARE alleles, review results to confirm assignment.</i> |                |         |       |       |       |       |       |       |

OR

| EPITYPE                                                                                       | ALLELES       | P GROUP | HVR-A | HVR-B | HVR-C | HVR-D | HVR-E | HVR-F |
|-----------------------------------------------------------------------------------------------|---------------|---------|-------|-------|-------|-------|-------|-------|
| <b>EDP319</b><br>1 rare                                                                       | DPB1* 319:01e | -       | LFQG  | EEFA  | AAE   | IQEEK | M     | GGPM  |
| <b>EDP840</b><br>1 rare                                                                       | DPB1* 840:01e | -       | IFQG  | EEFA  | AAE   | ILEEK | M     | GGPM  |
| <i>Both sides of this epitype require RARE alleles, review results to confirm assignment.</i> |               |         |       |       |       |       |       |       |

OR

| EPITYPE                                                                                       | ALLELES       | P GROUP | HVR-A | HVR-B | HVR-C | HVR-D | HVR-E | HVR-F |
|-----------------------------------------------------------------------------------------------|---------------|---------|-------|-------|-------|-------|-------|-------|
| <b>EDP179</b><br>1 rare                                                                       | DPB1* 179:01e | -       | LFQG  | EEFA  | AAE   | LLEER | M     | GGPM  |
| <b>EDP679</b><br>1 rare                                                                       | DPB1* 679:01e | -       | PFQG  | EEFA  | AAE   | ILEEK | M     | GGPM  |
| <i>Both sides of this epitype require RARE alleles, review results to confirm assignment.</i> |               |         |       |       |       |       |       |       |

OR

| EPITYPE | ALLELES | P GROUP | HVR-A | HVR-B | HVR-C | HVR-D | HVR-E | HVR-F |
|---------|---------|---------|-------|-------|-------|-------|-------|-------|
|---------|---------|---------|-------|-------|-------|-------|-------|-------|

|                                                                                               |               |   |      |      |     |       |   |      |
|-----------------------------------------------------------------------------------------------|---------------|---|------|------|-----|-------|---|------|
| <b>EDP179</b><br>1 rare                                                                       | DPB1* 179:01e | - | LFQG | EEFA | AAE | LLEER | M | GGPM |
| <b>EDP592</b><br>1 rare                                                                       | DPB1* 592:01e | - | LFQG | EEFA | AAE | ILEEK | M | GGPR |
| <i>Both sides of this epitype require RARE alleles, review results to confirm assignment.</i> |               |   |      |      |     |       |   |      |

OR

| EPITYPE                                                                                       | ALLELES       | P GROUP | HVR-A | HVR-B | HVR-C | HVR-D | HVR-E | HVR-F |
|-----------------------------------------------------------------------------------------------|---------------|---------|-------|-------|-------|-------|-------|-------|
| <b>EDP179</b><br>1 rare                                                                       | DPB1* 179:01e | -       | LFQG  | EEFA  | AAE   | LLEER | M     | GGPM  |
| <b>EDP972</b><br>1 rare                                                                       | DPB1* 972:01e | -       | LFQG  | GEFV  | AAE   | ILEEK | M     | GGPM  |
| <i>Both sides of this epitype require RARE alleles, review results to confirm assignment.</i> |               |         |       |       |       |       |       |       |

OR

| EPITYPE                                                                                       | ALLELES       | P GROUP | HVR-A | HVR-B | HVR-C | HVR-D | HVR-E | HVR-F |
|-----------------------------------------------------------------------------------------------|---------------|---------|-------|-------|-------|-------|-------|-------|
| <b>EDP179</b><br>1 rare                                                                       | DPB1* 179:01e | -       | LFQG  | EEFA  | AAE   | LLEER | M     | GGPM  |
| <b>EDP642</b><br>1 rare                                                                       | DPB1* 642:01e | -       | LFQG  | EEFA  | DAE   | ILEEK | M     | GGPM  |
| <i>Both sides of this epitype require RARE alleles, review results to confirm assignment.</i> |               |         |       |       |       |       |       |       |

OR

| EPITYPE                                                                                       | ALLELES         | P GROUP | HVR-A | HVR-B | HVR-C | HVR-D | HVR-E | HVR-F |
|-----------------------------------------------------------------------------------------------|-----------------|---------|-------|-------|-------|-------|-------|-------|
| <b>EDP179</b><br>1 rare                                                                       | DPB1* 179:01e   | -       | LFQG  | EEFA  | AAE   | LLEER | M     | GGPM  |
| <b>EDP1135</b><br>1 rare                                                                      | DPB1* 1135:01Ne | -       | LFQG  | EEFA  | AAE   | ILGGE | D     | GRAH  |
| <i>Both sides of this epitype require RARE alleles, review results to confirm assignment.</i> |                 |         |       |       |       |       |       |       |

OR

| EPITYPE | ALLELES | P GROUP | HVR-A | HVR-B | HVR-C | HVR-D | HVR-E | HVR-F |
|---------|---------|---------|-------|-------|-------|-------|-------|-------|
|---------|---------|---------|-------|-------|-------|-------|-------|-------|

|                                                                                               |               |   |      |      |     |       |   |      |
|-----------------------------------------------------------------------------------------------|---------------|---|------|------|-----|-------|---|------|
| <b>EDP179</b><br>1 rare                                                                       | DPB1* 179:01e | - | LFQG | EEFA | AAE | LLEER | M | GGPM |
| <b>EDP687</b><br>1 rare                                                                       | DPB1* 687:01e | - | LFQL | EEFA | AAE | ILEEK | M | GGPM |
| <i>Both sides of this epitype require RARE alleles, review results to confirm assignment.</i> |               |   |      |      |     |       |   |      |

OR

| EPITYPE                                                                                       | ALLELES       | P GROUP | HVR-A | HVR-B | HVR-C | HVR-D | HVR-E | HVR-F |
|-----------------------------------------------------------------------------------------------|---------------|---------|-------|-------|-------|-------|-------|-------|
| <b>EDP179</b><br>1 rare                                                                       | DPB1* 179:01e | -       | LFQG  | EEFA  | AAE   | LLEER | M     | GGPM  |
| <b>EDP427</b><br>1 rare                                                                       | DPB1* 427:01e | -       | LFQG  | EEFA  | ATE   | ILEEK | M     | GGPM  |
| <i>Both sides of this epitype require RARE alleles, review results to confirm assignment.</i> |               |         |       |       |       |       |       |       |

OR

| EPITYPE                                                                                       | ALLELES        | P GROUP | HVR-A | HVR-B | HVR-C | HVR-D | HVR-E | HVR-F |
|-----------------------------------------------------------------------------------------------|----------------|---------|-------|-------|-------|-------|-------|-------|
| <b>EDP179</b><br>1 rare                                                                       | DPB1* 179:01e  | -       | LFQG  | EEFA  | AAE   | LLEER | M     | GGPM  |
| <b>EDP867</b><br>1 rare                                                                       | DPB1* 867:01Ne | -       | LFQG  | EEFA  | CCG   | HPGGE | D     | GRAH  |
| <i>Both sides of this epitype require RARE alleles, review results to confirm assignment.</i> |                |         |       |       |       |       |       |       |

OR

| EPITYPE                                                                                       | ALLELES       | P GROUP | HVR-A | HVR-B | HVR-C | HVR-D | HVR-E | HVR-F |
|-----------------------------------------------------------------------------------------------|---------------|---------|-------|-------|-------|-------|-------|-------|
| <b>EDP177</b><br>1 rare                                                                       | DPB1* 177:01e | -       | LFQG  | EEFA  | AAE   | ILEEK | M     | SGPM  |
| <b>EDP179</b><br>1 rare                                                                       | DPB1* 179:01e | -       | LFQG  | EEFA  | AAE   | LLEER | M     | GGPM  |
| <i>Both sides of this epitype require RARE alleles, review results to confirm assignment.</i> |               |         |       |       |       |       |       |       |

OR

| EPITYPE | ALLELES | P GROUP | HVR-A | HVR-B | HVR-C | HVR-D | HVR-E | HVR-F |
|---------|---------|---------|-------|-------|-------|-------|-------|-------|
|---------|---------|---------|-------|-------|-------|-------|-------|-------|

|                                                                                               |               |   |      |      |     |       |   |      |
|-----------------------------------------------------------------------------------------------|---------------|---|------|------|-----|-------|---|------|
| <b>EDP179</b><br>1 rare                                                                       | DPB1* 179:01e | - | LFQG | EEFA | AAE | LLEER | M | GGPM |
| <b>EDP747</b><br>1 rare                                                                       | DPB1* 747:01e | - | VFQG | EEFA | AAE | ILEEK | M | GGPM |
| <i>Both sides of this epitype require RARE alleles, review results to confirm assignment.</i> |               |   |      |      |     |       |   |      |

OR

| EPITYPE                                                                                       | ALLELES        | P GROUP | HVR-A | HVR-B | HVR-C | HVR-D | HVR-E | HVR-F |
|-----------------------------------------------------------------------------------------------|----------------|---------|-------|-------|-------|-------|-------|-------|
| <b>EDP179</b><br>1 rare                                                                       | DPB1* 179:01e  | -       | LFQG  | EEFA  | AAE   | LLEER | M     | GGPM  |
| <b>EDP1122</b><br>1 rare                                                                      | DPB1* 1122:01e | -       | LFQG  | EECA  | AAE   | ILEEK | M     | GGPM  |
| <i>Both sides of this epitype require RARE alleles, review results to confirm assignment.</i> |                |         |       |       |       |       |       |       |

OR

| EPITYPE                                                                                       | ALLELES       | P GROUP | HVR-A | HVR-B | HVR-C | HVR-D | HVR-E | HVR-F |
|-----------------------------------------------------------------------------------------------|---------------|---------|-------|-------|-------|-------|-------|-------|
| <b>EDP179</b><br>1 rare                                                                       | DPB1* 179:01e | -       | LFQG  | EEFA  | AAE   | LLEER | M     | GGPM  |
| <b>EDP280</b><br>1 rare                                                                       | DPB1* 280:01e | -       | LFQG  | EEFA  | AAE   | ILEEK | M     | GAPM  |
| <i>Both sides of this epitype require RARE alleles, review results to confirm assignment.</i> |               |         |       |       |       |       |       |       |

OR

| EPITYPE                                                                                       | ALLELES       | P GROUP | HVR-A | HVR-B | HVR-C | HVR-D | HVR-E | HVR-F |
|-----------------------------------------------------------------------------------------------|---------------|---------|-------|-------|-------|-------|-------|-------|
| <b>EDP179</b><br>1 rare                                                                       | DPB1* 179:01e | -       | LFQG  | EEFA  | AAE   | LLEER | M     | GGPM  |
| <b>EDP230</b><br>1 rare                                                                       | DPB1* 230:01e | -       | LFQG  | EEFA  | AAE   | ILEEK | M     | GWPM  |
| <i>Both sides of this epitype require RARE alleles, review results to confirm assignment.</i> |               |         |       |       |       |       |       |       |

OR

| EPITYPE | ALLELES | P GROUP | HVR-A | HVR-B | HVR-C | HVR-D | HVR-E | HVR-F |
|---------|---------|---------|-------|-------|-------|-------|-------|-------|
|---------|---------|---------|-------|-------|-------|-------|-------|-------|

|                                                                                               |                |   |      |      |     |       |   |      |
|-----------------------------------------------------------------------------------------------|----------------|---|------|------|-----|-------|---|------|
| <b>EDP179</b><br>1 rare                                                                       | DPB1* 179:01e  | - | LFQG | EEFA | AAE | LLEER | M | GGPM |
| <b>EDP570</b><br>1 rare                                                                       | DPB1* 911:01Ne | - | -    | -    | -   | -     | - | -    |
| <i>Both sides of this epitype require RARE alleles, review results to confirm assignment.</i> |                |   |      |      |     |       |   |      |

OR

| EPITYPE                                                                                       | ALLELES       | P GROUP | HVR-A | HVR-B | HVR-C | HVR-D | HVR-E | HVR-F |
|-----------------------------------------------------------------------------------------------|---------------|---------|-------|-------|-------|-------|-------|-------|
| <b>EDP179</b><br>1 rare                                                                       | DPB1* 179:01e | -       | LFQG  | EEFA  | AAE   | LLEER | M     | GGPM  |
| <b>EDP840</b><br>1 rare                                                                       | DPB1* 840:01e | -       | IFQG  | EEFA  | AAE   | ILEEK | M     | GGPM  |
| <i>Both sides of this epitype require RARE alleles, review results to confirm assignment.</i> |               |         |       |       |       |       |       |       |

OR

| EPITYPE                                                                                       | ALLELES       | P GROUP | HVR-A | HVR-B | HVR-C | HVR-D | HVR-E | HVR-F |
|-----------------------------------------------------------------------------------------------|---------------|---------|-------|-------|-------|-------|-------|-------|
| <b>EDP592</b><br>1 rare                                                                       | DPB1* 592:01e | -       | LFQG  | EEFA  | AAE   | ILEEK | M     | GGPR  |
| <b>EDP679</b><br>1 rare                                                                       | DPB1* 679:01e | -       | PFQG  | EEFA  | AAE   | ILEEK | M     | GGPM  |
| <i>Both sides of this epitype require RARE alleles, review results to confirm assignment.</i> |               |         |       |       |       |       |       |       |

OR

| EPITYPE                                                                                       | ALLELES       | P GROUP | HVR-A | HVR-B | HVR-C | HVR-D | HVR-E | HVR-F |
|-----------------------------------------------------------------------------------------------|---------------|---------|-------|-------|-------|-------|-------|-------|
| <b>EDP679</b><br>1 rare                                                                       | DPB1* 679:01e | -       | PFQG  | EEFA  | AAE   | ILEEK | M     | GGPM  |
| <b>EDP972</b><br>1 rare                                                                       | DPB1* 972:01e | -       | LFQG  | GEFV  | AAE   | ILEEK | M     | GGPM  |
| <i>Both sides of this epitype require RARE alleles, review results to confirm assignment.</i> |               |         |       |       |       |       |       |       |

OR

| EPITYPE | ALLELES | P GROUP | HVR-A | HVR-B | HVR-C | HVR-D | HVR-E | HVR-F |
|---------|---------|---------|-------|-------|-------|-------|-------|-------|
|---------|---------|---------|-------|-------|-------|-------|-------|-------|

|                                                                                               |               |   |      |      |     |       |   |      |
|-----------------------------------------------------------------------------------------------|---------------|---|------|------|-----|-------|---|------|
| <b>EDP642</b><br>1 rare                                                                       | DPB1* 642:01e | - | LFQG | EEFA | DAE | ILEEK | M | GGPM |
| <b>EDP679</b><br>1 rare                                                                       | DPB1* 679:01e | - | PFQG | EEFA | AAE | ILEEK | M | GGPM |
| <i>Both sides of this epitope require RARE alleles, review results to confirm assignment.</i> |               |   |      |      |     |       |   |      |

OR

| EPITYPE                                                                                       | ALLELES        | P GROUP | HVR-A | HVR-B | HVR-C | HVR-D | HVR-E | HVR-F |
|-----------------------------------------------------------------------------------------------|----------------|---------|-------|-------|-------|-------|-------|-------|
| <b>EDP679</b><br>1 rare                                                                       | DPB1* 679:01e  | -       | PFQG  | EEFA  | AAE   | ILEEK | M     | GGPM  |
| <b>EDP1081</b><br>1 rare                                                                      | DPB1* 1081:01e | -       | LFQG  | EEFA  | AAE   | VLEEK | M     | GGPM  |
| <i>Both sides of this epitope require RARE alleles, review results to confirm assignment.</i> |                |         |       |       |       |       |       |       |

OR

| EPITYPE                                                                                       | ALLELES         | P GROUP | HVR-A | HVR-B | HVR-C | HVR-D | HVR-E | HVR-F |
|-----------------------------------------------------------------------------------------------|-----------------|---------|-------|-------|-------|-------|-------|-------|
| <b>EDP679</b><br>1 rare                                                                       | DPB1* 679:01e   | -       | PFQG  | EEFA  | AAE   | ILEEK | M     | GGPM  |
| <b>EDP1135</b><br>1 rare                                                                      | DPB1* 1135:01Ne | -       | LFQG  | EEFA  | AAE   | ILGGE | D     | GRAH  |
| <i>Both sides of this epitope require RARE alleles, review results to confirm assignment.</i> |                 |         |       |       |       |       |       |       |

OR

| EPITYPE                                                                                       | ALLELES       | P GROUP | HVR-A | HVR-B | HVR-C | HVR-D | HVR-E | HVR-F |
|-----------------------------------------------------------------------------------------------|---------------|---------|-------|-------|-------|-------|-------|-------|
| <b>EDP679</b><br>1 rare                                                                       | DPB1* 679:01e | -       | PFQG  | EEFA  | AAE   | ILEEK | M     | GGPM  |
| <b>EDP687</b><br>1 rare                                                                       | DPB1* 687:01e | -       | LFQL  | EEFA  | AAE   | ILEEK | M     | GGPM  |
| <i>Both sides of this epitope require RARE alleles, review results to confirm assignment.</i> |               |         |       |       |       |       |       |       |

OR

| EPITYPE | ALLELES | P GROUP | HVR-A | HVR-B | HVR-C | HVR-D | HVR-E | HVR-F |
|---------|---------|---------|-------|-------|-------|-------|-------|-------|
|---------|---------|---------|-------|-------|-------|-------|-------|-------|

|                                                                                               |               |   |      |      |     |       |   |      |
|-----------------------------------------------------------------------------------------------|---------------|---|------|------|-----|-------|---|------|
| <b>EDP427</b><br>1 rare                                                                       | DPB1* 427:01e | - | LFQG | EEFA | ATE | ILEEK | M | GGPM |
| <b>EDP679</b><br>1 rare                                                                       | DPB1* 679:01e | - | PFQG | EEFA | AAE | ILEEK | M | GGPM |
| <i>Both sides of this epitype require RARE alleles, review results to confirm assignment.</i> |               |   |      |      |     |       |   |      |

OR

| EPITYPE                                                                                       | ALLELES        | P GROUP | HVR-A | HVR-B | HVR-C | HVR-D | HVR-E | HVR-F |
|-----------------------------------------------------------------------------------------------|----------------|---------|-------|-------|-------|-------|-------|-------|
| <b>EDP679</b><br>1 rare                                                                       | DPB1* 679:01e  | -       | PFQG  | EEFA  | AAE   | ILEEK | M     | GGPM  |
| <b>EDP867</b><br>1 rare                                                                       | DPB1* 867:01Ne | -       | LFQG  | EEFA  | CCG   | HPGGE | D     | GRAH  |
| <i>Both sides of this epitype require RARE alleles, review results to confirm assignment.</i> |                |         |       |       |       |       |       |       |

OR

| EPITYPE                                                                                       | ALLELES       | P GROUP | HVR-A | HVR-B | HVR-C | HVR-D | HVR-E | HVR-F |
|-----------------------------------------------------------------------------------------------|---------------|---------|-------|-------|-------|-------|-------|-------|
| <b>EDP177</b><br>1 rare                                                                       | DPB1* 177:01e | -       | LFQG  | EEFA  | AAE   | ILEEK | M     | SGPM  |
| <b>EDP679</b><br>1 rare                                                                       | DPB1* 679:01e | -       | PFQG  | EEFA  | AAE   | ILEEK | M     | GGPM  |
| <i>Both sides of this epitype require RARE alleles, review results to confirm assignment.</i> |               |         |       |       |       |       |       |       |

OR

| EPITYPE                                                                                       | ALLELES       | P GROUP | HVR-A | HVR-B | HVR-C | HVR-D | HVR-E | HVR-F |
|-----------------------------------------------------------------------------------------------|---------------|---------|-------|-------|-------|-------|-------|-------|
| <b>EDP679</b><br>1 rare                                                                       | DPB1* 679:01e | -       | PFQG  | EEFA  | AAE   | ILEEK | M     | GGPM  |
| <b>EDP747</b><br>1 rare                                                                       | DPB1* 747:01e | -       | VFQG  | EEFA  | AAE   | ILEEK | M     | GGPM  |
| <i>Both sides of this epitype require RARE alleles, review results to confirm assignment.</i> |               |         |       |       |       |       |       |       |

OR

| EPITYPE | ALLELES | P GROUP | HVR-A | HVR-B | HVR-C | HVR-D | HVR-E | HVR-F |
|---------|---------|---------|-------|-------|-------|-------|-------|-------|
|---------|---------|---------|-------|-------|-------|-------|-------|-------|



|                                                                                               |                |   |      |      |     |       |   |      |
|-----------------------------------------------------------------------------------------------|----------------|---|------|------|-----|-------|---|------|
| <b>EDP679</b><br>1 rare                                                                       | DPB1* 679:01e  | - | PFQG | EEFA | AAE | ILEEK | M | GGPM |
| <b>EDP1122</b><br>1 rare                                                                      | DPB1* 1122:01e | - | LFQG | EECA | AAE | ILEEK | M | GGPM |
| <i>Both sides of this epitope require RARE alleles, review results to confirm assignment.</i> |                |   |      |      |     |       |   |      |

OR

| EPITYPE                                                                                       | ALLELES       | P GROUP | HVR-A | HVR-B | HVR-C | HVR-D | HVR-E | HVR-F |
|-----------------------------------------------------------------------------------------------|---------------|---------|-------|-------|-------|-------|-------|-------|
| <b>EDP280</b><br>1 rare                                                                       | DPB1* 280:01e | -       | LFQG  | EEFA  | AAE   | ILEEK | M     | GAPM  |
| <b>EDP679</b><br>1 rare                                                                       | DPB1* 679:01e | -       | PFQG  | EEFA  | AAE   | ILEEK | M     | GGPM  |
| <i>Both sides of this epitope require RARE alleles, review results to confirm assignment.</i> |               |         |       |       |       |       |       |       |

OR

| EPITYPE                                                                                       | ALLELES       | P GROUP | HVR-A | HVR-B | HVR-C | HVR-D | HVR-E | HVR-F |
|-----------------------------------------------------------------------------------------------|---------------|---------|-------|-------|-------|-------|-------|-------|
| <b>EDP230</b><br>1 rare                                                                       | DPB1* 230:01e | -       | LFQG  | EEFA  | AAE   | ILEEK | M     | GWPM  |
| <b>EDP679</b><br>1 rare                                                                       | DPB1* 679:01e | -       | PFQG  | EEFA  | AAE   | ILEEK | M     | GGPM  |
| <i>Both sides of this epitope require RARE alleles, review results to confirm assignment.</i> |               |         |       |       |       |       |       |       |

OR

| EPITYPE                                                                                       | ALLELES        | P GROUP | HVR-A | HVR-B | HVR-C | HVR-D | HVR-E | HVR-F |
|-----------------------------------------------------------------------------------------------|----------------|---------|-------|-------|-------|-------|-------|-------|
| <b>EDP570</b><br>1 rare                                                                       | DPB1* 911:01Ne | -       | -     | -     | -     | -     | -     | -     |
| <b>EDP679</b><br>1 rare                                                                       | DPB1* 679:01e  | -       | PFQG  | EEFA  | AAE   | ILEEK | M     | GGPM  |
| <i>Both sides of this epitope require RARE alleles, review results to confirm assignment.</i> |                |         |       |       |       |       |       |       |

OR

| EPITYPE | ALLELES | P GROUP | HVR-A | HVR-B | HVR-C | HVR-D | HVR-E | HVR-F |
|---------|---------|---------|-------|-------|-------|-------|-------|-------|
|---------|---------|---------|-------|-------|-------|-------|-------|-------|

|                                                                                               |               |   |      |      |     |       |   |      |
|-----------------------------------------------------------------------------------------------|---------------|---|------|------|-----|-------|---|------|
| <b>EDP679</b><br>1 rare                                                                       | DPB1* 679:01e | - | PFQG | EEFA | AAE | ILEEK | M | GGPM |
| <b>EDP840</b><br>1 rare                                                                       | DPB1* 840:01e | - | IFQG | EEFA | AAE | ILEEK | M | GGPM |
| <i>Both sides of this epitype require RARE alleles, review results to confirm assignment.</i> |               |   |      |      |     |       |   |      |

OR

| EPITYPE                                                                                       | ALLELES       | P GROUP | HVR-A | HVR-B | HVR-C | HVR-D | HVR-E | HVR-F |
|-----------------------------------------------------------------------------------------------|---------------|---------|-------|-------|-------|-------|-------|-------|
| <b>EDP592</b><br>1 rare                                                                       | DPB1* 592:01e | -       | LFQG  | EEFA  | AAE   | ILEEK | M     | GGPR  |
| <b>EDP972</b><br>1 rare                                                                       | DPB1* 972:01e | -       | LFQG  | GEFV  | AAE   | ILEEK | M     | GGPM  |
| <i>Both sides of this epitype require RARE alleles, review results to confirm assignment.</i> |               |         |       |       |       |       |       |       |

OR

| EPITYPE                                                                                       | ALLELES       | P GROUP | HVR-A | HVR-B | HVR-C | HVR-D | HVR-E | HVR-F |
|-----------------------------------------------------------------------------------------------|---------------|---------|-------|-------|-------|-------|-------|-------|
| <b>EDP592</b><br>1 rare                                                                       | DPB1* 592:01e | -       | LFQG  | EEFA  | AAE   | ILEEK | M     | GGPR  |
| <b>EDP642</b><br>1 rare                                                                       | DPB1* 642:01e | -       | LFQG  | EEFA  | DAE   | ILEEK | M     | GGPM  |
| <i>Both sides of this epitype require RARE alleles, review results to confirm assignment.</i> |               |         |       |       |       |       |       |       |

OR

| EPITYPE                                                                                       | ALLELES        | P GROUP | HVR-A | HVR-B | HVR-C | HVR-D | HVR-E | HVR-F |
|-----------------------------------------------------------------------------------------------|----------------|---------|-------|-------|-------|-------|-------|-------|
| <b>EDP592</b><br>1 rare                                                                       | DPB1* 592:01e  | -       | LFQG  | EEFA  | AAE   | ILEEK | M     | GGPR  |
| <b>EDP1081</b><br>1 rare                                                                      | DPB1* 1081:01e | -       | LFQG  | EEFA  | AAE   | VLEEK | M     | GGPM  |
| <i>Both sides of this epitype require RARE alleles, review results to confirm assignment.</i> |                |         |       |       |       |       |       |       |

OR

| EPITYPE | ALLELES | P GROUP | HVR-A | HVR-B | HVR-C | HVR-D | HVR-E | HVR-F |
|---------|---------|---------|-------|-------|-------|-------|-------|-------|
|---------|---------|---------|-------|-------|-------|-------|-------|-------|

|                                                                                               |                 |   |      |      |     |       |   |      |
|-----------------------------------------------------------------------------------------------|-----------------|---|------|------|-----|-------|---|------|
| <b>EDP592</b><br>1 rare                                                                       | DPB1* 592:01e   | - | LFQG | EEFA | AAE | ILEEK | M | GGPR |
| <b>EDP1135</b><br>1 rare                                                                      | DPB1* 1135:01Ne | - | LFQG | EEFA | AAE | ILGGE | D | GRAH |
| <i>Both sides of this epitope require RARE alleles, review results to confirm assignment.</i> |                 |   |      |      |     |       |   |      |

OR

| EPITYPE                                                                                       | ALLELES       | P GROUP | HVR-A | HVR-B | HVR-C | HVR-D | HVR-E | HVR-F |
|-----------------------------------------------------------------------------------------------|---------------|---------|-------|-------|-------|-------|-------|-------|
| <b>EDP592</b><br>1 rare                                                                       | DPB1* 592:01e | -       | LFQG  | EEFA  | AAE   | ILEEK | M     | GGPR  |
| <b>EDP687</b><br>1 rare                                                                       | DPB1* 687:01e | -       | LFQL  | EEFA  | AAE   | ILEEK | M     | GGPM  |
| <i>Both sides of this epitope require RARE alleles, review results to confirm assignment.</i> |               |         |       |       |       |       |       |       |

OR

| EPITYPE                                                                                       | ALLELES       | P GROUP | HVR-A | HVR-B | HVR-C | HVR-D | HVR-E | HVR-F |
|-----------------------------------------------------------------------------------------------|---------------|---------|-------|-------|-------|-------|-------|-------|
| <b>EDP427</b><br>1 rare                                                                       | DPB1* 427:01e | -       | LFQG  | EEFA  | ATE   | ILEEK | M     | GGPM  |
| <b>EDP592</b><br>1 rare                                                                       | DPB1* 592:01e | -       | LFQG  | EEFA  | AAE   | ILEEK | M     | GGPR  |
| <i>Both sides of this epitope require RARE alleles, review results to confirm assignment.</i> |               |         |       |       |       |       |       |       |

OR

| EPITYPE                                                                                       | ALLELES        | P GROUP | HVR-A | HVR-B | HVR-C | HVR-D | HVR-E | HVR-F |
|-----------------------------------------------------------------------------------------------|----------------|---------|-------|-------|-------|-------|-------|-------|
| <b>EDP592</b><br>1 rare                                                                       | DPB1* 592:01e  | -       | LFQG  | EEFA  | AAE   | ILEEK | M     | GGPR  |
| <b>EDP867</b><br>1 rare                                                                       | DPB1* 867:01Ne | -       | LFQG  | EEFA  | CCG   | HPGGE | D     | GRAH  |
| <i>Both sides of this epitope require RARE alleles, review results to confirm assignment.</i> |                |         |       |       |       |       |       |       |

OR

| EPITYPE | ALLELES | P GROUP | HVR-A | HVR-B | HVR-C | HVR-D | HVR-E | HVR-F |
|---------|---------|---------|-------|-------|-------|-------|-------|-------|
|---------|---------|---------|-------|-------|-------|-------|-------|-------|

|                                                                                               |               |   |      |      |     |       |   |      |
|-----------------------------------------------------------------------------------------------|---------------|---|------|------|-----|-------|---|------|
| <b>EDP177</b><br>1 rare                                                                       | DPB1* 177:01e | - | LFQG | EEFA | AAE | ILEEK | M | SGPM |
| <b>EDP592</b><br>1 rare                                                                       | DPB1* 592:01e | - | LFQG | EEFA | AAE | ILEEK | M | GGPR |
| <i>Both sides of this epitype require RARE alleles, review results to confirm assignment.</i> |               |   |      |      |     |       |   |      |

OR

| EPITYPE                                                                                       | ALLELES       | P GROUP | HVR-A | HVR-B | HVR-C | HVR-D | HVR-E | HVR-F |
|-----------------------------------------------------------------------------------------------|---------------|---------|-------|-------|-------|-------|-------|-------|
| <b>EDP592</b><br>1 rare                                                                       | DPB1* 592:01e | -       | LFQG  | EEFA  | AAE   | ILEEK | M     | GGPR  |
| <b>EDP747</b><br>1 rare                                                                       | DPB1* 747:01e | -       | VFQG  | EEFA  | AAE   | ILEEK | M     | GGPM  |
| <i>Both sides of this epitype require RARE alleles, review results to confirm assignment.</i> |               |         |       |       |       |       |       |       |

OR

| EPITYPE                                                                                       | ALLELES        | P GROUP | HVR-A | HVR-B | HVR-C | HVR-D | HVR-E | HVR-F |
|-----------------------------------------------------------------------------------------------|----------------|---------|-------|-------|-------|-------|-------|-------|
| <b>EDP592</b><br>1 rare                                                                       | DPB1* 592:01e  | -       | LFQG  | EEFA  | AAE   | ILEEK | M     | GGPR  |
| <b>EDP1122</b><br>1 rare                                                                      | DPB1* 1122:01e | -       | LFQG  | EECA  | AAE   | ILEEK | M     | GGPM  |
| <i>Both sides of this epitype require RARE alleles, review results to confirm assignment.</i> |                |         |       |       |       |       |       |       |

OR

| EPITYPE                                                                                       | ALLELES       | P GROUP | HVR-A | HVR-B | HVR-C | HVR-D | HVR-E | HVR-F |
|-----------------------------------------------------------------------------------------------|---------------|---------|-------|-------|-------|-------|-------|-------|
| <b>EDP280</b><br>1 rare                                                                       | DPB1* 280:01e | -       | LFQG  | EEFA  | AAE   | ILEEK | M     | GAPM  |
| <b>EDP592</b><br>1 rare                                                                       | DPB1* 592:01e | -       | LFQG  | EEFA  | AAE   | ILEEK | M     | GGPR  |
| <i>Both sides of this epitype require RARE alleles, review results to confirm assignment.</i> |               |         |       |       |       |       |       |       |

OR

| EPITYPE | ALLELES | P GROUP | HVR-A | HVR-B | HVR-C | HVR-D | HVR-E | HVR-F |
|---------|---------|---------|-------|-------|-------|-------|-------|-------|
|---------|---------|---------|-------|-------|-------|-------|-------|-------|

|                                                                                               |               |   |      |      |     |       |   |             |
|-----------------------------------------------------------------------------------------------|---------------|---|------|------|-----|-------|---|-------------|
| <b>EDP230</b><br>1 rare                                                                       | DPB1* 230:01e | - | LFQG | EEFA | AAE | ILEEK | M | <b>GWPM</b> |
| <b>EDP592</b><br>1 rare                                                                       | DPB1* 592:01e | - | LFQG | EEFA | AAE | ILEEK | M | <b>GGPR</b> |
| <i>Both sides of this epitype require RARE alleles, review results to confirm assignment.</i> |               |   |      |      |     |       |   |             |

OR

| EPITYPE                                                                                       | ALLELES        | P GROUP | HVR-A | HVR-B | HVR-C | HVR-D | HVR-E | HVR-F       |
|-----------------------------------------------------------------------------------------------|----------------|---------|-------|-------|-------|-------|-------|-------------|
| <b>EDP570</b><br>1 rare                                                                       | DPB1* 911:01Ne | -       | -     | -     | -     | -     | -     | -           |
| <b>EDP592</b><br>1 rare                                                                       | DPB1* 592:01e  | -       | LFQG  | EEFA  | AAE   | ILEEK | M     | <b>GGPR</b> |
| <i>Both sides of this epitype require RARE alleles, review results to confirm assignment.</i> |                |         |       |       |       |       |       |             |

OR

| EPITYPE                                                                                       | ALLELES       | P GROUP | HVR-A | HVR-B | HVR-C | HVR-D | HVR-E | HVR-F       |
|-----------------------------------------------------------------------------------------------|---------------|---------|-------|-------|-------|-------|-------|-------------|
| <b>EDP592</b><br>1 rare                                                                       | DPB1* 592:01e | -       | LFQG  | EEFA  | AAE   | ILEEK | M     | <b>GGPR</b> |
| <b>EDP840</b><br>1 rare                                                                       | DPB1* 840:01e | -       | IFQG  | EEFA  | AAE   | ILEEK | M     | <b>GGPM</b> |
| <i>Both sides of this epitype require RARE alleles, review results to confirm assignment.</i> |               |         |       |       |       |       |       |             |

OR

| EPITYPE                                                                                       | ALLELES       | P GROUP | HVR-A | HVR-B | HVR-C | HVR-D | HVR-E | HVR-F |
|-----------------------------------------------------------------------------------------------|---------------|---------|-------|-------|-------|-------|-------|-------|
| <b>EDP642</b><br>1 rare                                                                       | DPB1* 642:01e | -       | LFQG  | EEFA  | DAE   | ILEEK | M     | GGPM  |
| <b>EDP972</b><br>1 rare                                                                       | DPB1* 972:01e | -       | LFQG  | GEFV  | AAE   | ILEEK | M     | GGPM  |
| <i>Both sides of this epitype require RARE alleles, review results to confirm assignment.</i> |               |         |       |       |       |       |       |       |

OR

| EPITYPE | ALLELES | P GROUP | HVR-A | HVR-B | HVR-C | HVR-D | HVR-E | HVR-F |
|---------|---------|---------|-------|-------|-------|-------|-------|-------|
|---------|---------|---------|-------|-------|-------|-------|-------|-------|

|                                                                                               |                |   |      |      |     |       |   |      |
|-----------------------------------------------------------------------------------------------|----------------|---|------|------|-----|-------|---|------|
| <b>EDP972</b><br>1 rare                                                                       | DPB1* 972:01e  | - | LFQG | GEFV | AAE | ILEEK | M | GGPM |
| <b>EDP1081</b><br>1 rare                                                                      | DPB1* 1081:01e | - | LFQG | EEFA | AAE | VLEEK | M | GGPM |
| <i>Both sides of this epitope require RARE alleles, review results to confirm assignment.</i> |                |   |      |      |     |       |   |      |

OR

| EPITYPE                                                                                       | ALLELES         | P GROUP | HVR-A | HVR-B | HVR-C | HVR-D | HVR-E | HVR-F |
|-----------------------------------------------------------------------------------------------|-----------------|---------|-------|-------|-------|-------|-------|-------|
| <b>EDP972</b><br>1 rare                                                                       | DPB1* 972:01e   | -       | LFQG  | GEFV  | AAE   | ILEEK | M     | GGPM  |
| <b>EDP1135</b><br>1 rare                                                                      | DPB1* 1135:01Ne | -       | LFQG  | EEFA  | AAE   | ILGGE | D     | GRAH  |
| <i>Both sides of this epitope require RARE alleles, review results to confirm assignment.</i> |                 |         |       |       |       |       |       |       |

OR

| EPITYPE                                                                                       | ALLELES       | P GROUP | HVR-A | HVR-B | HVR-C | HVR-D | HVR-E | HVR-F |
|-----------------------------------------------------------------------------------------------|---------------|---------|-------|-------|-------|-------|-------|-------|
| <b>EDP687</b><br>1 rare                                                                       | DPB1* 687:01e | -       | LFQL  | EEFA  | AAE   | ILEEK | M     | GGPM  |
| <b>EDP972</b><br>1 rare                                                                       | DPB1* 972:01e | -       | LFQG  | GEFV  | AAE   | ILEEK | M     | GGPM  |
| <i>Both sides of this epitope require RARE alleles, review results to confirm assignment.</i> |               |         |       |       |       |       |       |       |

OR

| EPITYPE                                                                                       | ALLELES       | P GROUP | HVR-A | HVR-B | HVR-C | HVR-D | HVR-E | HVR-F |
|-----------------------------------------------------------------------------------------------|---------------|---------|-------|-------|-------|-------|-------|-------|
| <b>EDP427</b><br>1 rare                                                                       | DPB1* 427:01e | -       | LFQG  | EEFA  | ATE   | ILEEK | M     | GGPM  |
| <b>EDP972</b><br>1 rare                                                                       | DPB1* 972:01e | -       | LFQG  | GEFV  | AAE   | ILEEK | M     | GGPM  |
| <i>Both sides of this epitope require RARE alleles, review results to confirm assignment.</i> |               |         |       |       |       |       |       |       |

OR

| EPITYPE | ALLELES | P GROUP | HVR-A | HVR-B | HVR-C | HVR-D | HVR-E | HVR-F |
|---------|---------|---------|-------|-------|-------|-------|-------|-------|
|---------|---------|---------|-------|-------|-------|-------|-------|-------|

|                                                                                               |                |   |      |      |     |       |   |      |
|-----------------------------------------------------------------------------------------------|----------------|---|------|------|-----|-------|---|------|
| <b>EDP867</b><br>1 rare                                                                       | DPB1* 867:01Ne | - | LFQG | EEFA | CCG | HPGGE | D | GRAH |
| <b>EDP972</b><br>1 rare                                                                       | DPB1* 972:01e  | - | LFQG | GEFV | AAE | ILEEK | M | GGPM |
| <i>Both sides of this epitype require RARE alleles, review results to confirm assignment.</i> |                |   |      |      |     |       |   |      |

OR

| EPITYPE                                                                                       | ALLELES       | P GROUP | HVR-A | HVR-B | HVR-C | HVR-D | HVR-E | HVR-F |
|-----------------------------------------------------------------------------------------------|---------------|---------|-------|-------|-------|-------|-------|-------|
| <b>EDP177</b><br>1 rare                                                                       | DPB1* 177:01e | -       | LFQG  | EEFA  | AAE   | ILEEK | M     | SGPM  |
| <b>EDP972</b><br>1 rare                                                                       | DPB1* 972:01e | -       | LFQG  | GEFV  | AAE   | ILEEK | M     | GGPM  |
| <i>Both sides of this epitype require RARE alleles, review results to confirm assignment.</i> |               |         |       |       |       |       |       |       |

OR

| EPITYPE                                                                                       | ALLELES       | P GROUP | HVR-A | HVR-B | HVR-C | HVR-D | HVR-E | HVR-F |
|-----------------------------------------------------------------------------------------------|---------------|---------|-------|-------|-------|-------|-------|-------|
| <b>EDP747</b><br>1 rare                                                                       | DPB1* 747:01e | -       | VFQG  | EEFA  | AAE   | ILEEK | M     | GGPM  |
| <b>EDP972</b><br>1 rare                                                                       | DPB1* 972:01e | -       | LFQG  | GEFV  | AAE   | ILEEK | M     | GGPM  |
| <i>Both sides of this epitype require RARE alleles, review results to confirm assignment.</i> |               |         |       |       |       |       |       |       |

OR

| EPITYPE                                                                                       | ALLELES       | P GROUP | HVR-A | HVR-B | HVR-C | HVR-D | HVR-E | HVR-F |
|-----------------------------------------------------------------------------------------------|---------------|---------|-------|-------|-------|-------|-------|-------|
| <b>EDP280</b><br>1 rare                                                                       | DPB1* 280:01e | -       | LFQG  | EEFA  | AAE   | ILEEK | M     | GAPM  |
| <b>EDP972</b><br>1 rare                                                                       | DPB1* 972:01e | -       | LFQG  | GEFV  | AAE   | ILEEK | M     | GGPM  |
| <i>Both sides of this epitype require RARE alleles, review results to confirm assignment.</i> |               |         |       |       |       |       |       |       |

OR

| EPITYPE | ALLELES | P GROUP | HVR-A | HVR-B | HVR-C | HVR-D | HVR-E | HVR-F |
|---------|---------|---------|-------|-------|-------|-------|-------|-------|
|---------|---------|---------|-------|-------|-------|-------|-------|-------|

|                                                                                               |               |   |      |      |     |       |   |      |
|-----------------------------------------------------------------------------------------------|---------------|---|------|------|-----|-------|---|------|
| <b>EDP230</b><br>1 rare                                                                       | DPB1* 230:01e | - | LFQG | EEFA | AAE | ILEEK | M | GWPM |
| <b>EDP972</b><br>1 rare                                                                       | DPB1* 972:01e | - | LFQG | GEFV | AAE | ILEEK | M | GGPM |
| <i>Both sides of this epitype require RARE alleles, review results to confirm assignment.</i> |               |   |      |      |     |       |   |      |

OR

| EPITYPE                                                                                       | ALLELES        | P GROUP | HVR-A | HVR-B | HVR-C | HVR-D | HVR-E | HVR-F |
|-----------------------------------------------------------------------------------------------|----------------|---------|-------|-------|-------|-------|-------|-------|
| <b>EDP570</b><br>1 rare                                                                       | DPB1* 911:01Ne | -       | -     | -     | -     | -     | -     | -     |
| <b>EDP972</b><br>1 rare                                                                       | DPB1* 972:01e  | -       | LFQG  | GEFV  | AAE   | ILEEK | M     | GGPM  |
| <i>Both sides of this epitype require RARE alleles, review results to confirm assignment.</i> |                |         |       |       |       |       |       |       |

OR

| EPITYPE                                                                                       | ALLELES       | P GROUP | HVR-A | HVR-B | HVR-C | HVR-D | HVR-E | HVR-F |
|-----------------------------------------------------------------------------------------------|---------------|---------|-------|-------|-------|-------|-------|-------|
| <b>EDP840</b><br>1 rare                                                                       | DPB1* 840:01e | -       | IFQG  | EEFA  | AAE   | ILEEK | M     | GGPM  |
| <b>EDP972</b><br>1 rare                                                                       | DPB1* 972:01e | -       | LFQG  | GEFV  | AAE   | ILEEK | M     | GGPM  |
| <i>Both sides of this epitype require RARE alleles, review results to confirm assignment.</i> |               |         |       |       |       |       |       |       |

OR

| EPITYPE                                                                                       | ALLELES        | P GROUP | HVR-A | HVR-B | HVR-C | HVR-D | HVR-E | HVR-F |
|-----------------------------------------------------------------------------------------------|----------------|---------|-------|-------|-------|-------|-------|-------|
| <b>EDP642</b><br>1 rare                                                                       | DPB1* 642:01e  | -       | LFQG  | EEFA  | DAE   | ILEEK | M     | GGPM  |
| <b>EDP1081</b><br>1 rare                                                                      | DPB1* 1081:01e | -       | LFQG  | EEFA  | AAE   | VLEEK | M     | GGPM  |
| <i>Both sides of this epitype require RARE alleles, review results to confirm assignment.</i> |                |         |       |       |       |       |       |       |

OR

| EPITYPE | ALLELES | P GROUP | HVR-A | HVR-B | HVR-C | HVR-D | HVR-E | HVR-F |
|---------|---------|---------|-------|-------|-------|-------|-------|-------|
|---------|---------|---------|-------|-------|-------|-------|-------|-------|



|                                                                                               |                 |   |      |      |     |       |   |      |
|-----------------------------------------------------------------------------------------------|-----------------|---|------|------|-----|-------|---|------|
| <b>EDP642</b><br>1 rare                                                                       | DPB1* 642:01e   | - | LFQG | EEFA | DAE | ILEEK | M | GGPM |
| <b>EDP1135</b><br>1 rare                                                                      | DPB1* 1135:01Ne | - | LFQG | EEFA | AAE | ILGGE | D | GRAH |
| <i>Both sides of this epitype require RARE alleles, review results to confirm assignment.</i> |                 |   |      |      |     |       |   |      |

OR

| EPITYPE                                                                                       | ALLELES       | P GROUP | HVR-A | HVR-B | HVR-C | HVR-D | HVR-E | HVR-F |
|-----------------------------------------------------------------------------------------------|---------------|---------|-------|-------|-------|-------|-------|-------|
| <b>EDP642</b><br>1 rare                                                                       | DPB1* 642:01e | -       | LFQG  | EEFA  | DAE   | ILEEK | M     | GGPM  |
| <b>EDP687</b><br>1 rare                                                                       | DPB1* 687:01e | -       | LFQL  | EEFA  | AAE   | ILEEK | M     | GGPM  |
| <i>Both sides of this epitype require RARE alleles, review results to confirm assignment.</i> |               |         |       |       |       |       |       |       |

OR

| EPITYPE                                                                                       | ALLELES       | P GROUP | HVR-A | HVR-B | HVR-C | HVR-D | HVR-E | HVR-F |
|-----------------------------------------------------------------------------------------------|---------------|---------|-------|-------|-------|-------|-------|-------|
| <b>EDP427</b><br>1 rare                                                                       | DPB1* 427:01e | -       | LFQG  | EEFA  | ATE   | ILEEK | M     | GGPM  |
| <b>EDP642</b><br>1 rare                                                                       | DPB1* 642:01e | -       | LFQG  | EEFA  | DAE   | ILEEK | M     | GGPM  |
| <i>Both sides of this epitype require RARE alleles, review results to confirm assignment.</i> |               |         |       |       |       |       |       |       |

OR

| EPITYPE                                                                                       | ALLELES        | P GROUP | HVR-A | HVR-B | HVR-C | HVR-D | HVR-E | HVR-F |
|-----------------------------------------------------------------------------------------------|----------------|---------|-------|-------|-------|-------|-------|-------|
| <b>EDP642</b><br>1 rare                                                                       | DPB1* 642:01e  | -       | LFQG  | EEFA  | DAE   | ILEEK | M     | GGPM  |
| <b>EDP867</b><br>1 rare                                                                       | DPB1* 867:01Ne | -       | LFQG  | EEFA  | CCG   | HPGGE | D     | GRAH  |
| <i>Both sides of this epitype require RARE alleles, review results to confirm assignment.</i> |                |         |       |       |       |       |       |       |

OR

| EPITYPE | ALLELES | P GROUP | HVR-A | HVR-B | HVR-C | HVR-D | HVR-E | HVR-F |
|---------|---------|---------|-------|-------|-------|-------|-------|-------|
|---------|---------|---------|-------|-------|-------|-------|-------|-------|

|                                                                                               |               |   |      |      |     |       |   |      |
|-----------------------------------------------------------------------------------------------|---------------|---|------|------|-----|-------|---|------|
| <b>EDP177</b><br>1 rare                                                                       | DPB1* 177:01e | - | LFQG | EEFA | AAE | ILEEK | M | SGPM |
| <b>EDP642</b><br>1 rare                                                                       | DPB1* 642:01e | - | LFQG | EEFA | DAE | ILEEK | M | GGPM |
| <i>Both sides of this epitype require RARE alleles, review results to confirm assignment.</i> |               |   |      |      |     |       |   |      |

OR

| EPITYPE                                                                                       | ALLELES       | P GROUP | HVR-A | HVR-B | HVR-C | HVR-D | HVR-E | HVR-F |
|-----------------------------------------------------------------------------------------------|---------------|---------|-------|-------|-------|-------|-------|-------|
| <b>EDP642</b><br>1 rare                                                                       | DPB1* 642:01e | -       | LFQG  | EEFA  | DAE   | ILEEK | M     | GGPM  |
| <b>EDP747</b><br>1 rare                                                                       | DPB1* 747:01e | -       | VFQG  | EEFA  | AAE   | ILEEK | M     | GGPM  |
| <i>Both sides of this epitype require RARE alleles, review results to confirm assignment.</i> |               |         |       |       |       |       |       |       |

OR

| EPITYPE                                                                                       | ALLELES        | P GROUP | HVR-A | HVR-B | HVR-C | HVR-D | HVR-E | HVR-F |
|-----------------------------------------------------------------------------------------------|----------------|---------|-------|-------|-------|-------|-------|-------|
| <b>EDP642</b><br>1 rare                                                                       | DPB1* 642:01e  | -       | LFQG  | EEFA  | DAE   | ILEEK | M     | GGPM  |
| <b>EDP1122</b><br>1 rare                                                                      | DPB1* 1122:01e | -       | LFQG  | EECA  | AAE   | ILEEK | M     | GGPM  |
| <i>Both sides of this epitype require RARE alleles, review results to confirm assignment.</i> |                |         |       |       |       |       |       |       |

OR

| EPITYPE                                                                                       | ALLELES       | P GROUP | HVR-A | HVR-B | HVR-C | HVR-D | HVR-E | HVR-F |
|-----------------------------------------------------------------------------------------------|---------------|---------|-------|-------|-------|-------|-------|-------|
| <b>EDP280</b><br>1 rare                                                                       | DPB1* 280:01e | -       | LFQG  | EEFA  | AAE   | ILEEK | M     | GAPM  |
| <b>EDP642</b><br>1 rare                                                                       | DPB1* 642:01e | -       | LFQG  | EEFA  | DAE   | ILEEK | M     | GGPM  |
| <i>Both sides of this epitype require RARE alleles, review results to confirm assignment.</i> |               |         |       |       |       |       |       |       |

OR

| EPITYPE | ALLELES | P GROUP | HVR-A | HVR-B | HVR-C | HVR-D | HVR-E | HVR-F |
|---------|---------|---------|-------|-------|-------|-------|-------|-------|
|---------|---------|---------|-------|-------|-------|-------|-------|-------|

|                                                                                               |               |   |      |      |     |       |   |      |
|-----------------------------------------------------------------------------------------------|---------------|---|------|------|-----|-------|---|------|
| <b>EDP230</b><br>1 rare                                                                       | DPB1* 230:01e | - | LFQG | EEFA | AAE | ILEEK | M | GWPM |
| <b>EDP642</b><br>1 rare                                                                       | DPB1* 642:01e | - | LFQG | EEFA | DAE | ILEEK | M | GGPM |
| <i>Both sides of this epitype require RARE alleles, review results to confirm assignment.</i> |               |   |      |      |     |       |   |      |

OR

| EPITYPE                                                                                       | ALLELES        | P GROUP | HVR-A | HVR-B | HVR-C | HVR-D | HVR-E | HVR-F |
|-----------------------------------------------------------------------------------------------|----------------|---------|-------|-------|-------|-------|-------|-------|
| <b>EDP570</b><br>1 rare                                                                       | DPB1* 911:01Ne | -       | -     | -     | -     | -     | -     | -     |
| <b>EDP642</b><br>1 rare                                                                       | DPB1* 642:01e  | -       | LFQG  | EEFA  | DAE   | ILEEK | M     | GGPM  |
| <i>Both sides of this epitype require RARE alleles, review results to confirm assignment.</i> |                |         |       |       |       |       |       |       |

OR

| EPITYPE                                                                                       | ALLELES       | P GROUP | HVR-A | HVR-B | HVR-C | HVR-D | HVR-E | HVR-F |
|-----------------------------------------------------------------------------------------------|---------------|---------|-------|-------|-------|-------|-------|-------|
| <b>EDP642</b><br>1 rare                                                                       | DPB1* 642:01e | -       | LFQG  | EEFA  | DAE   | ILEEK | M     | GGPM  |
| <b>EDP840</b><br>1 rare                                                                       | DPB1* 840:01e | -       | IFQG  | EEFA  | AAE   | ILEEK | M     | GGPM  |
| <i>Both sides of this epitype require RARE alleles, review results to confirm assignment.</i> |               |         |       |       |       |       |       |       |

OR

| EPITYPE                                                                                       | ALLELES         | P GROUP | HVR-A | HVR-B | HVR-C | HVR-D | HVR-E | HVR-F |
|-----------------------------------------------------------------------------------------------|-----------------|---------|-------|-------|-------|-------|-------|-------|
| <b>EDP1081</b><br>1 rare                                                                      | DPB1* 1081:01e  | -       | LFQG  | EEFA  | AAE   | VLEEK | M     | GGPM  |
| <b>EDP1135</b><br>1 rare                                                                      | DPB1* 1135:01Ne | -       | LFQG  | EEFA  | AAE   | ILGGE | D     | GRAH  |
| <i>Both sides of this epitype require RARE alleles, review results to confirm assignment.</i> |                 |         |       |       |       |       |       |       |

OR

| EPITYPE | ALLELES | P GROUP | HVR-A | HVR-B | HVR-C | HVR-D | HVR-E | HVR-F |
|---------|---------|---------|-------|-------|-------|-------|-------|-------|
|---------|---------|---------|-------|-------|-------|-------|-------|-------|

|                                                                                               |                |   |      |      |     |       |   |      |
|-----------------------------------------------------------------------------------------------|----------------|---|------|------|-----|-------|---|------|
| <b>EDP687</b><br>1 rare                                                                       | DPB1* 687:01e  | - | LFQL | EEFA | AAE | ILEEK | M | GGPM |
| <b>EDP1081</b><br>1 rare                                                                      | DPB1* 1081:01e | - | LFQG | EEFA | AAE | VLEEK | M | GGPM |
| <i>Both sides of this epitype require RARE alleles, review results to confirm assignment.</i> |                |   |      |      |     |       |   |      |

OR

| EPITYPE                                                                                       | ALLELES        | P GROUP | HVR-A | HVR-B | HVR-C | HVR-D | HVR-E | HVR-F |
|-----------------------------------------------------------------------------------------------|----------------|---------|-------|-------|-------|-------|-------|-------|
| <b>EDP427</b><br>1 rare                                                                       | DPB1* 427:01e  | -       | LFQG  | EEFA  | ATE   | ILEEK | M     | GGPM  |
| <b>EDP1081</b><br>1 rare                                                                      | DPB1* 1081:01e | -       | LFQG  | EEFA  | AAE   | VLEEK | M     | GGPM  |
| <i>Both sides of this epitype require RARE alleles, review results to confirm assignment.</i> |                |         |       |       |       |       |       |       |

OR

| EPITYPE                                                                                       | ALLELES        | P GROUP | HVR-A | HVR-B | HVR-C | HVR-D | HVR-E | HVR-F |
|-----------------------------------------------------------------------------------------------|----------------|---------|-------|-------|-------|-------|-------|-------|
| <b>EDP867</b><br>1 rare                                                                       | DPB1* 867:01Ne | -       | LFQG  | EEFA  | CCG   | HPGGE | D     | GRAH  |
| <b>EDP1081</b><br>1 rare                                                                      | DPB1* 1081:01e | -       | LFQG  | EEFA  | AAE   | VLEEK | M     | GGPM  |
| <i>Both sides of this epitype require RARE alleles, review results to confirm assignment.</i> |                |         |       |       |       |       |       |       |

OR

| EPITYPE                                                                                       | ALLELES        | P GROUP | HVR-A | HVR-B | HVR-C | HVR-D | HVR-E | HVR-F |
|-----------------------------------------------------------------------------------------------|----------------|---------|-------|-------|-------|-------|-------|-------|
| <b>EDP177</b><br>1 rare                                                                       | DPB1* 177:01e  | -       | LFQG  | EEFA  | AAE   | ILEEK | M     | SGPM  |
| <b>EDP1081</b><br>1 rare                                                                      | DPB1* 1081:01e | -       | LFQG  | EEFA  | AAE   | VLEEK | M     | GGPM  |
| <i>Both sides of this epitype require RARE alleles, review results to confirm assignment.</i> |                |         |       |       |       |       |       |       |

OR

| EPITYPE | ALLELES | P GROUP | HVR-A | HVR-B | HVR-C | HVR-D | HVR-E | HVR-F |
|---------|---------|---------|-------|-------|-------|-------|-------|-------|
|---------|---------|---------|-------|-------|-------|-------|-------|-------|

|                                                                                               |                |   |      |      |     |       |   |      |
|-----------------------------------------------------------------------------------------------|----------------|---|------|------|-----|-------|---|------|
| <b>EDP747</b><br>1 rare                                                                       | DPB1* 747:01e  | - | VFQG | EEFA | AAE | ILEEK | M | GGPM |
| <b>EDP1081</b><br>1 rare                                                                      | DPB1* 1081:01e | - | LFQG | EEFA | AAE | VLEEK | M | GGPM |
| <i>Both sides of this epitope require RARE alleles, review results to confirm assignment.</i> |                |   |      |      |     |       |   |      |

OR

| EPITYPE                                                                                       | ALLELES        | P GROUP | HVR-A | HVR-B | HVR-C | HVR-D | HVR-E | HVR-F |
|-----------------------------------------------------------------------------------------------|----------------|---------|-------|-------|-------|-------|-------|-------|
| <b>EDP1081</b><br>1 rare                                                                      | DPB1* 1081:01e | -       | LFQG  | EEFA  | AAE   | VLEEK | M     | GGPM  |
| <b>EDP1122</b><br>1 rare                                                                      | DPB1* 1122:01e | -       | LFQG  | EECA  | AAE   | ILEEK | M     | GGPM  |
| <i>Both sides of this epitope require RARE alleles, review results to confirm assignment.</i> |                |         |       |       |       |       |       |       |

OR

| EPITYPE                                                                                       | ALLELES        | P GROUP | HVR-A | HVR-B | HVR-C | HVR-D | HVR-E | HVR-F |
|-----------------------------------------------------------------------------------------------|----------------|---------|-------|-------|-------|-------|-------|-------|
| <b>EDP280</b><br>1 rare                                                                       | DPB1* 280:01e  | -       | LFQG  | EEFA  | AAE   | ILEEK | M     | GAPM  |
| <b>EDP1081</b><br>1 rare                                                                      | DPB1* 1081:01e | -       | LFQG  | EEFA  | AAE   | VLEEK | M     | GGPM  |
| <i>Both sides of this epitope require RARE alleles, review results to confirm assignment.</i> |                |         |       |       |       |       |       |       |

OR

| EPITYPE                                                                                       | ALLELES        | P GROUP | HVR-A | HVR-B | HVR-C | HVR-D | HVR-E | HVR-F |
|-----------------------------------------------------------------------------------------------|----------------|---------|-------|-------|-------|-------|-------|-------|
| <b>EDP230</b><br>1 rare                                                                       | DPB1* 230:01e  | -       | LFQG  | EEFA  | AAE   | ILEEK | M     | GWPM  |
| <b>EDP1081</b><br>1 rare                                                                      | DPB1* 1081:01e | -       | LFQG  | EEFA  | AAE   | VLEEK | M     | GGPM  |
| <i>Both sides of this epitope require RARE alleles, review results to confirm assignment.</i> |                |         |       |       |       |       |       |       |

OR

| EPITYPE | ALLELES | P GROUP | HVR-A | HVR-B | HVR-C | HVR-D | HVR-E | HVR-F |
|---------|---------|---------|-------|-------|-------|-------|-------|-------|
|---------|---------|---------|-------|-------|-------|-------|-------|-------|

|                                                                                               |                |   |      |      |     |       |   |      |
|-----------------------------------------------------------------------------------------------|----------------|---|------|------|-----|-------|---|------|
| <b>EDP570</b><br>1 rare                                                                       | DPB1* 911:01Ne | - | -    | -    | -   | -     | - | -    |
| <b>EDP1081</b><br>1 rare                                                                      | DPB1* 1081:01e | - | LFQG | EEFA | AAE | VLEEK | M | GGPM |
| <i>Both sides of this epitope require RARE alleles, review results to confirm assignment.</i> |                |   |      |      |     |       |   |      |

OR

| EPITYPE                                                                                       | ALLELES        | P GROUP | HVR-A | HVR-B | HVR-C | HVR-D | HVR-E | HVR-F |
|-----------------------------------------------------------------------------------------------|----------------|---------|-------|-------|-------|-------|-------|-------|
| <b>EDP840</b><br>1 rare                                                                       | DPB1* 840:01e  | -       | IFQG  | EEFA  | AAE   | ILEEK | M     | GGPM  |
| <b>EDP1081</b><br>1 rare                                                                      | DPB1* 1081:01e | -       | LFQG  | EEFA  | AAE   | VLEEK | M     | GGPM  |
| <i>Both sides of this epitope require RARE alleles, review results to confirm assignment.</i> |                |         |       |       |       |       |       |       |

OR

| EPITYPE                                                                                       | ALLELES         | P GROUP | HVR-A | HVR-B | HVR-C | HVR-D | HVR-E | HVR-F |
|-----------------------------------------------------------------------------------------------|-----------------|---------|-------|-------|-------|-------|-------|-------|
| <b>EDP687</b><br>1 rare                                                                       | DPB1* 687:01e   | -       | LFQL  | EEFA  | AAE   | ILEEK | M     | GGPM  |
| <b>EDP1135</b><br>1 rare                                                                      | DPB1* 1135:01Ne | -       | LFQG  | EEFA  | AAE   | ILGGE | D     | GRAH  |
| <i>Both sides of this epitope require RARE alleles, review results to confirm assignment.</i> |                 |         |       |       |       |       |       |       |

OR

| EPITYPE                                                                                       | ALLELES         | P GROUP | HVR-A | HVR-B | HVR-C | HVR-D | HVR-E | HVR-F |
|-----------------------------------------------------------------------------------------------|-----------------|---------|-------|-------|-------|-------|-------|-------|
| <b>EDP427</b><br>1 rare                                                                       | DPB1* 427:01e   | -       | LFQG  | EEFA  | ATE   | ILEEK | M     | GGPM  |
| <b>EDP1135</b><br>1 rare                                                                      | DPB1* 1135:01Ne | -       | LFQG  | EEFA  | AAE   | ILGGE | D     | GRAH  |
| <i>Both sides of this epitope require RARE alleles, review results to confirm assignment.</i> |                 |         |       |       |       |       |       |       |

OR

| EPITYPE | ALLELES | P GROUP | HVR-A | HVR-B | HVR-C | HVR-D | HVR-E | HVR-F |
|---------|---------|---------|-------|-------|-------|-------|-------|-------|
|---------|---------|---------|-------|-------|-------|-------|-------|-------|

|                                                                                               |                 |   |      |      |     |       |   |      |
|-----------------------------------------------------------------------------------------------|-----------------|---|------|------|-----|-------|---|------|
| <b>EDP867</b><br>1 rare                                                                       | DPB1* 867:01Ne  | - | LFQG | EEFA | CCG | HPGGE | D | GRAH |
| <b>EDP1135</b><br>1 rare                                                                      | DPB1* 1135:01Ne | - | LFQG | EEFA | AAE | ILGGE | D | GRAH |
| <i>Both sides of this epitope require RARE alleles, review results to confirm assignment.</i> |                 |   |      |      |     |       |   |      |

OR

| EPITYPE                                                                                       | ALLELES         | P GROUP | HVR-A | HVR-B | HVR-C | HVR-D | HVR-E | HVR-F |
|-----------------------------------------------------------------------------------------------|-----------------|---------|-------|-------|-------|-------|-------|-------|
| <b>EDP177</b><br>1 rare                                                                       | DPB1* 177:01e   | -       | LFQG  | EEFA  | AAE   | ILEEK | M     | SGPM  |
| <b>EDP1135</b><br>1 rare                                                                      | DPB1* 1135:01Ne | -       | LFQG  | EEFA  | AAE   | ILGGE | D     | GRAH  |
| <i>Both sides of this epitope require RARE alleles, review results to confirm assignment.</i> |                 |         |       |       |       |       |       |       |

OR

| EPITYPE                                                                                       | ALLELES         | P GROUP | HVR-A | HVR-B | HVR-C | HVR-D | HVR-E | HVR-F |
|-----------------------------------------------------------------------------------------------|-----------------|---------|-------|-------|-------|-------|-------|-------|
| <b>EDP747</b><br>1 rare                                                                       | DPB1* 747:01e   | -       | VFQG  | EEFA  | AAE   | ILEEK | M     | GGPM  |
| <b>EDP1135</b><br>1 rare                                                                      | DPB1* 1135:01Ne | -       | LFQG  | EEFA  | AAE   | ILGGE | D     | GRAH  |
| <i>Both sides of this epitope require RARE alleles, review results to confirm assignment.</i> |                 |         |       |       |       |       |       |       |

OR

| EPITYPE                                                                                       | ALLELES         | P GROUP | HVR-A | HVR-B | HVR-C | HVR-D | HVR-E | HVR-F |
|-----------------------------------------------------------------------------------------------|-----------------|---------|-------|-------|-------|-------|-------|-------|
| <b>EDP1122</b><br>1 rare                                                                      | DPB1* 1122:01e  | -       | LFQG  | EECA  | AAE   | ILEEK | M     | GGPM  |
| <b>EDP1135</b><br>1 rare                                                                      | DPB1* 1135:01Ne | -       | LFQG  | EEFA  | AAE   | ILGGE | D     | GRAH  |
| <i>Both sides of this epitope require RARE alleles, review results to confirm assignment.</i> |                 |         |       |       |       |       |       |       |

OR

| EPITYPE | ALLELES | P GROUP | HVR-A | HVR-B | HVR-C | HVR-D | HVR-E | HVR-F |
|---------|---------|---------|-------|-------|-------|-------|-------|-------|
|---------|---------|---------|-------|-------|-------|-------|-------|-------|

|                                                                                               |                 |   |      |      |     |              |          |             |
|-----------------------------------------------------------------------------------------------|-----------------|---|------|------|-----|--------------|----------|-------------|
| <b>EDP280</b><br>1 rare                                                                       | DPB1* 280:01e   | - | LFQG | EEFA | AAE | ILEEK        | M        | <b>GAPM</b> |
| <b>EDP1135</b><br>1 rare                                                                      | DPB1* 1135:01Ne | - | LFQG | EEFA | AAE | <b>ILGGE</b> | <b>D</b> | <b>GRAH</b> |
| <i>Both sides of this epitope require RARE alleles, review results to confirm assignment.</i> |                 |   |      |      |     |              |          |             |

OR

| EPITYPE                                                                                       | ALLELES         | P GROUP | HVR-A | HVR-B | HVR-C | HVR-D        | HVR-E    | HVR-F       |
|-----------------------------------------------------------------------------------------------|-----------------|---------|-------|-------|-------|--------------|----------|-------------|
| <b>EDP230</b><br>1 rare                                                                       | DPB1* 230:01e   | -       | LFQG  | EEFA  | AAE   | ILEEK        | M        | <b>GWPM</b> |
| <b>EDP1135</b><br>1 rare                                                                      | DPB1* 1135:01Ne | -       | LFQG  | EEFA  | AAE   | <b>ILGGE</b> | <b>D</b> | <b>GRAH</b> |
| <i>Both sides of this epitope require RARE alleles, review results to confirm assignment.</i> |                 |         |       |       |       |              |          |             |

OR

| EPITYPE                                                                                       | ALLELES         | P GROUP | HVR-A | HVR-B | HVR-C | HVR-D        | HVR-E    | HVR-F       |
|-----------------------------------------------------------------------------------------------|-----------------|---------|-------|-------|-------|--------------|----------|-------------|
| <b>EDP570</b><br>1 rare                                                                       | DPB1* 911:01Ne  | -       | -     | -     | -     | -            | -        | -           |
| <b>EDP1135</b><br>1 rare                                                                      | DPB1* 1135:01Ne | -       | LFQG  | EEFA  | AAE   | <b>ILGGE</b> | <b>D</b> | <b>GRAH</b> |
| <i>Both sides of this epitope require RARE alleles, review results to confirm assignment.</i> |                 |         |       |       |       |              |          |             |

OR

| EPITYPE                                                                                       | ALLELES         | P GROUP | HVR-A       | HVR-B | HVR-C | HVR-D        | HVR-E    | HVR-F       |
|-----------------------------------------------------------------------------------------------|-----------------|---------|-------------|-------|-------|--------------|----------|-------------|
| <b>EDP840</b><br>1 rare                                                                       | DPB1* 840:01e   | -       | <b>IFQG</b> | EEFA  | AAE   | ILEEK        | M        | GGPM        |
| <b>EDP1135</b><br>1 rare                                                                      | DPB1* 1135:01Ne | -       | LFQG        | EEFA  | AAE   | <b>ILGGE</b> | <b>D</b> | <b>GRAH</b> |
| <i>Both sides of this epitope require RARE alleles, review results to confirm assignment.</i> |                 |         |             |       |       |              |          |             |

OR

| EPITYPE | ALLELES | P GROUP | HVR-A | HVR-B | HVR-C | HVR-D | HVR-E | HVR-F |
|---------|---------|---------|-------|-------|-------|-------|-------|-------|
|---------|---------|---------|-------|-------|-------|-------|-------|-------|



|                                                                                               |               |   |      |      |     |       |   |      |
|-----------------------------------------------------------------------------------------------|---------------|---|------|------|-----|-------|---|------|
| <b>EDP427</b><br>1 rare                                                                       | DPB1* 427:01e | - | LFQG | EEFA | ATE | ILEEK | M | GGPM |
| <b>EDP687</b><br>1 rare                                                                       | DPB1* 687:01e | - | LFQL | EEFA | AAE | ILEEK | M | GGPM |
| <i>Both sides of this epitype require RARE alleles, review results to confirm assignment.</i> |               |   |      |      |     |       |   |      |

OR

| EPITYPE                                                                                       | ALLELES        | P GROUP | HVR-A | HVR-B | HVR-C | HVR-D | HVR-E | HVR-F |
|-----------------------------------------------------------------------------------------------|----------------|---------|-------|-------|-------|-------|-------|-------|
| <b>EDP687</b><br>1 rare                                                                       | DPB1* 687:01e  | -       | LFQL  | EEFA  | AAE   | ILEEK | M     | GGPM  |
| <b>EDP867</b><br>1 rare                                                                       | DPB1* 867:01Ne | -       | LFQG  | EEFA  | CCG   | HPGGE | D     | GRAH  |
| <i>Both sides of this epitype require RARE alleles, review results to confirm assignment.</i> |                |         |       |       |       |       |       |       |

OR

| EPITYPE                                                                                       | ALLELES       | P GROUP | HVR-A | HVR-B | HVR-C | HVR-D | HVR-E | HVR-F |
|-----------------------------------------------------------------------------------------------|---------------|---------|-------|-------|-------|-------|-------|-------|
| <b>EDP177</b><br>1 rare                                                                       | DPB1* 177:01e | -       | LFQG  | EEFA  | AAE   | ILEEK | M     | SGPM  |
| <b>EDP687</b><br>1 rare                                                                       | DPB1* 687:01e | -       | LFQL  | EEFA  | AAE   | ILEEK | M     | GGPM  |
| <i>Both sides of this epitype require RARE alleles, review results to confirm assignment.</i> |               |         |       |       |       |       |       |       |

OR

| EPITYPE                                                                                       | ALLELES       | P GROUP | HVR-A | HVR-B | HVR-C | HVR-D | HVR-E | HVR-F |
|-----------------------------------------------------------------------------------------------|---------------|---------|-------|-------|-------|-------|-------|-------|
| <b>EDP687</b><br>1 rare                                                                       | DPB1* 687:01e | -       | LFQL  | EEFA  | AAE   | ILEEK | M     | GGPM  |
| <b>EDP747</b><br>1 rare                                                                       | DPB1* 747:01e | -       | VFQG  | EEFA  | AAE   | ILEEK | M     | GGPM  |
| <i>Both sides of this epitype require RARE alleles, review results to confirm assignment.</i> |               |         |       |       |       |       |       |       |

OR

| EPITYPE | ALLELES | P GROUP | HVR-A | HVR-B | HVR-C | HVR-D | HVR-E | HVR-F |
|---------|---------|---------|-------|-------|-------|-------|-------|-------|
|---------|---------|---------|-------|-------|-------|-------|-------|-------|

|                                                                                               |                |   |      |      |     |       |   |      |
|-----------------------------------------------------------------------------------------------|----------------|---|------|------|-----|-------|---|------|
| <b>EDP687</b><br>1 rare                                                                       | DPB1* 687:01e  | - | LFQL | EEFA | AAE | ILEEK | M | GGPM |
| <b>EDP1122</b><br>1 rare                                                                      | DPB1* 1122:01e | - | LFQG | EECA | AAE | ILEEK | M | GGPM |
| <i>Both sides of this epitope require RARE alleles, review results to confirm assignment.</i> |                |   |      |      |     |       |   |      |

OR

| EPITYPE                                                                                       | ALLELES       | P GROUP | HVR-A | HVR-B | HVR-C | HVR-D | HVR-E | HVR-F |
|-----------------------------------------------------------------------------------------------|---------------|---------|-------|-------|-------|-------|-------|-------|
| <b>EDP280</b><br>1 rare                                                                       | DPB1* 280:01e | -       | LFQG  | EEFA  | AAE   | ILEEK | M     | GAPM  |
| <b>EDP687</b><br>1 rare                                                                       | DPB1* 687:01e | -       | LFQL  | EEFA  | AAE   | ILEEK | M     | GGPM  |
| <i>Both sides of this epitope require RARE alleles, review results to confirm assignment.</i> |               |         |       |       |       |       |       |       |

OR

| EPITYPE                                                                                       | ALLELES       | P GROUP | HVR-A | HVR-B | HVR-C | HVR-D | HVR-E | HVR-F |
|-----------------------------------------------------------------------------------------------|---------------|---------|-------|-------|-------|-------|-------|-------|
| <b>EDP230</b><br>1 rare                                                                       | DPB1* 230:01e | -       | LFQG  | EEFA  | AAE   | ILEEK | M     | GWPM  |
| <b>EDP687</b><br>1 rare                                                                       | DPB1* 687:01e | -       | LFQL  | EEFA  | AAE   | ILEEK | M     | GGPM  |
| <i>Both sides of this epitope require RARE alleles, review results to confirm assignment.</i> |               |         |       |       |       |       |       |       |

OR

| EPITYPE                                                                                       | ALLELES        | P GROUP | HVR-A | HVR-B | HVR-C | HVR-D | HVR-E | HVR-F |
|-----------------------------------------------------------------------------------------------|----------------|---------|-------|-------|-------|-------|-------|-------|
| <b>EDP570</b><br>1 rare                                                                       | DPB1* 911:01Ne | -       | -     | -     | -     | -     | -     | -     |
| <b>EDP687</b><br>1 rare                                                                       | DPB1* 687:01e  | -       | LFQL  | EEFA  | AAE   | ILEEK | M     | GGPM  |
| <i>Both sides of this epitope require RARE alleles, review results to confirm assignment.</i> |                |         |       |       |       |       |       |       |

OR

| EPITYPE | ALLELES | P GROUP | HVR-A | HVR-B | HVR-C | HVR-D | HVR-E | HVR-F |
|---------|---------|---------|-------|-------|-------|-------|-------|-------|
|---------|---------|---------|-------|-------|-------|-------|-------|-------|

|                                                                                               |               |   |      |      |     |       |   |      |
|-----------------------------------------------------------------------------------------------|---------------|---|------|------|-----|-------|---|------|
| <b>EDP687</b><br>1 rare                                                                       | DPB1* 687:01e | - | LFQL | EEFA | AAE | ILEEK | M | GGPM |
| <b>EDP840</b><br>1 rare                                                                       | DPB1* 840:01e | - | IFQG | EEFA | AAE | ILEEK | M | GGPM |
| <i>Both sides of this epitype require RARE alleles, review results to confirm assignment.</i> |               |   |      |      |     |       |   |      |

OR

| EPITYPE                                                                                       | ALLELES        | P GROUP | HVR-A | HVR-B | HVR-C | HVR-D | HVR-E | HVR-F |
|-----------------------------------------------------------------------------------------------|----------------|---------|-------|-------|-------|-------|-------|-------|
| <b>EDP427</b><br>1 rare                                                                       | DPB1* 427:01e  | -       | LFQG  | EEFA  | ATE   | ILEEK | M     | GGPM  |
| <b>EDP867</b><br>1 rare                                                                       | DPB1* 867:01Ne | -       | LFQG  | EEFA  | CCG   | HPGGE | D     | GRAH  |
| <i>Both sides of this epitype require RARE alleles, review results to confirm assignment.</i> |                |         |       |       |       |       |       |       |

OR

| EPITYPE                                                                                       | ALLELES       | P GROUP | HVR-A | HVR-B | HVR-C | HVR-D | HVR-E | HVR-F |
|-----------------------------------------------------------------------------------------------|---------------|---------|-------|-------|-------|-------|-------|-------|
| <b>EDP177</b><br>1 rare                                                                       | DPB1* 177:01e | -       | LFQG  | EEFA  | AAE   | ILEEK | M     | SGPM  |
| <b>EDP427</b><br>1 rare                                                                       | DPB1* 427:01e | -       | LFQG  | EEFA  | ATE   | ILEEK | M     | GGPM  |
| <i>Both sides of this epitype require RARE alleles, review results to confirm assignment.</i> |               |         |       |       |       |       |       |       |

OR

| EPITYPE                                                                                       | ALLELES       | P GROUP | HVR-A | HVR-B | HVR-C | HVR-D | HVR-E | HVR-F |
|-----------------------------------------------------------------------------------------------|---------------|---------|-------|-------|-------|-------|-------|-------|
| <b>EDP427</b><br>1 rare                                                                       | DPB1* 427:01e | -       | LFQG  | EEFA  | ATE   | ILEEK | M     | GGPM  |
| <b>EDP747</b><br>1 rare                                                                       | DPB1* 747:01e | -       | VFQG  | EEFA  | AAE   | ILEEK | M     | GGPM  |
| <i>Both sides of this epitype require RARE alleles, review results to confirm assignment.</i> |               |         |       |       |       |       |       |       |

OR

| EPITYPE | ALLELES | P GROUP | HVR-A | HVR-B | HVR-C | HVR-D | HVR-E | HVR-F |
|---------|---------|---------|-------|-------|-------|-------|-------|-------|
|---------|---------|---------|-------|-------|-------|-------|-------|-------|

|                                                                                               |                |   |      |      |     |       |   |      |
|-----------------------------------------------------------------------------------------------|----------------|---|------|------|-----|-------|---|------|
| <b>EDP427</b><br>1 rare                                                                       | DPB1* 427:01e  | - | LFQG | EEFA | ATE | ILEEK | M | GGPM |
| <b>EDP1122</b><br>1 rare                                                                      | DPB1* 1122:01e | - | LFQG | EECA | AAE | ILEEK | M | GGPM |
| <i>Both sides of this epitope require RARE alleles, review results to confirm assignment.</i> |                |   |      |      |     |       |   |      |

OR

| EPITYPE                                                                                       | ALLELES       | P GROUP | HVR-A | HVR-B | HVR-C | HVR-D | HVR-E | HVR-F |
|-----------------------------------------------------------------------------------------------|---------------|---------|-------|-------|-------|-------|-------|-------|
| <b>EDP280</b><br>1 rare                                                                       | DPB1* 280:01e | -       | LFQG  | EEFA  | AAE   | ILEEK | M     | GAPM  |
| <b>EDP427</b><br>1 rare                                                                       | DPB1* 427:01e | -       | LFQG  | EEFA  | ATE   | ILEEK | M     | GGPM  |
| <i>Both sides of this epitope require RARE alleles, review results to confirm assignment.</i> |               |         |       |       |       |       |       |       |

OR

| EPITYPE                                                                                       | ALLELES       | P GROUP | HVR-A | HVR-B | HVR-C | HVR-D | HVR-E | HVR-F |
|-----------------------------------------------------------------------------------------------|---------------|---------|-------|-------|-------|-------|-------|-------|
| <b>EDP230</b><br>1 rare                                                                       | DPB1* 230:01e | -       | LFQG  | EEFA  | AAE   | ILEEK | M     | GWPM  |
| <b>EDP427</b><br>1 rare                                                                       | DPB1* 427:01e | -       | LFQG  | EEFA  | ATE   | ILEEK | M     | GGPM  |
| <i>Both sides of this epitope require RARE alleles, review results to confirm assignment.</i> |               |         |       |       |       |       |       |       |

OR

| EPITYPE                                                                                       | ALLELES        | P GROUP | HVR-A | HVR-B | HVR-C | HVR-D | HVR-E | HVR-F |
|-----------------------------------------------------------------------------------------------|----------------|---------|-------|-------|-------|-------|-------|-------|
| <b>EDP427</b><br>1 rare                                                                       | DPB1* 427:01e  | -       | LFQG  | EEFA  | ATE   | ILEEK | M     | GGPM  |
| <b>EDP570</b><br>1 rare                                                                       | DPB1* 911:01Ne | -       | -     | -     | -     | -     | -     | -     |
| <i>Both sides of this epitope require RARE alleles, review results to confirm assignment.</i> |                |         |       |       |       |       |       |       |

OR

| EPITYPE | ALLELES | P GROUP | HVR-A | HVR-B | HVR-C | HVR-D | HVR-E | HVR-F |
|---------|---------|---------|-------|-------|-------|-------|-------|-------|
|         |         |         |       |       |       |       |       |       |

|                                                                                               |               |   |      |      |     |       |   |      |
|-----------------------------------------------------------------------------------------------|---------------|---|------|------|-----|-------|---|------|
| <b>EDP427</b><br>1 rare                                                                       | DPB1* 427:01e | - | LFQG | EEFA | ATE | ILEEK | M | GGPM |
| <b>EDP840</b><br>1 rare                                                                       | DPB1* 840:01e | - | IFQG | EEFA | AAE | ILEEK | M | GGPM |
| <i>Both sides of this epitope require RARE alleles, review results to confirm assignment.</i> |               |   |      |      |     |       |   |      |

OR

| EPITYPE                                                                                       | ALLELES        | P GROUP | HVR-A | HVR-B | HVR-C | HVR-D | HVR-E | HVR-F |
|-----------------------------------------------------------------------------------------------|----------------|---------|-------|-------|-------|-------|-------|-------|
| <b>EDP177</b><br>1 rare                                                                       | DPB1* 177:01e  | -       | LFQG  | EEFA  | AAE   | ILEEK | M     | SGPM  |
| <b>EDP867</b><br>1 rare                                                                       | DPB1* 867:01Ne | -       | LFQG  | EEFA  | CCG   | HPGGE | D     | GRAH  |
| <i>Both sides of this epitope require RARE alleles, review results to confirm assignment.</i> |                |         |       |       |       |       |       |       |

OR

| EPITYPE                                                                                       | ALLELES        | P GROUP | HVR-A | HVR-B | HVR-C | HVR-D | HVR-E | HVR-F |
|-----------------------------------------------------------------------------------------------|----------------|---------|-------|-------|-------|-------|-------|-------|
| <b>EDP747</b><br>1 rare                                                                       | DPB1* 747:01e  | -       | VFQG  | EEFA  | AAE   | ILEEK | M     | GGPM  |
| <b>EDP867</b><br>1 rare                                                                       | DPB1* 867:01Ne | -       | LFQG  | EEFA  | CCG   | HPGGE | D     | GRAH  |
| <i>Both sides of this epitope require RARE alleles, review results to confirm assignment.</i> |                |         |       |       |       |       |       |       |

OR

| EPITYPE                                                                                       | ALLELES        | P GROUP | HVR-A | HVR-B | HVR-C | HVR-D | HVR-E | HVR-F |
|-----------------------------------------------------------------------------------------------|----------------|---------|-------|-------|-------|-------|-------|-------|
| <b>EDP867</b><br>1 rare                                                                       | DPB1* 867:01Ne | -       | LFQG  | EEFA  | CCG   | HPGGE | D     | GRAH  |
| <b>EDP1122</b><br>1 rare                                                                      | DPB1* 1122:01e | -       | LFQG  | EECA  | AAE   | ILEEK | M     | GGPM  |
| <i>Both sides of this epitope require RARE alleles, review results to confirm assignment.</i> |                |         |       |       |       |       |       |       |

OR

| EPITYPE | ALLELES | P GROUP | HVR-A | HVR-B | HVR-C | HVR-D | HVR-E | HVR-F |
|---------|---------|---------|-------|-------|-------|-------|-------|-------|
|---------|---------|---------|-------|-------|-------|-------|-------|-------|

|                                                                                               |                |   |      |      |            |              |          |             |
|-----------------------------------------------------------------------------------------------|----------------|---|------|------|------------|--------------|----------|-------------|
| <b>EDP280</b><br>1 rare                                                                       | DPB1* 280:01e  | - | LFQG | EEFA | AAE        | ILEEK        | M        | <b>GAPM</b> |
| <b>EDP867</b><br>1 rare                                                                       | DPB1* 867:01Ne | - | LFQG | EEFA | <b>CCG</b> | <b>HPGGE</b> | <b>D</b> | <b>GRAH</b> |
| <i>Both sides of this epitype require RARE alleles, review results to confirm assignment.</i> |                |   |      |      |            |              |          |             |

OR

| EPITYPE                                                                                       | ALLELES        | P GROUP | HVR-A | HVR-B | HVR-C      | HVR-D        | HVR-E    | HVR-F       |
|-----------------------------------------------------------------------------------------------|----------------|---------|-------|-------|------------|--------------|----------|-------------|
| <b>EDP230</b><br>1 rare                                                                       | DPB1* 230:01e  | -       | LFQG  | EEFA  | AAE        | ILEEK        | M        | <b>GWPM</b> |
| <b>EDP867</b><br>1 rare                                                                       | DPB1* 867:01Ne | -       | LFQG  | EEFA  | <b>CCG</b> | <b>HPGGE</b> | <b>D</b> | <b>GRAH</b> |
| <i>Both sides of this epitype require RARE alleles, review results to confirm assignment.</i> |                |         |       |       |            |              |          |             |

OR

| EPITYPE                                                                                       | ALLELES        | P GROUP | HVR-A | HVR-B | HVR-C      | HVR-D        | HVR-E    | HVR-F       |
|-----------------------------------------------------------------------------------------------|----------------|---------|-------|-------|------------|--------------|----------|-------------|
| <b>EDP570</b><br>1 rare                                                                       | DPB1* 911:01Ne | -       | -     | -     | -          | -            | -        | -           |
| <b>EDP867</b><br>1 rare                                                                       | DPB1* 867:01Ne | -       | LFQG  | EEFA  | <b>CCG</b> | <b>HPGGE</b> | <b>D</b> | <b>GRAH</b> |
| <i>Both sides of this epitype require RARE alleles, review results to confirm assignment.</i> |                |         |       |       |            |              |          |             |

OR

| EPITYPE                                                                                       | ALLELES        | P GROUP | HVR-A       | HVR-B | HVR-C      | HVR-D        | HVR-E    | HVR-F       |
|-----------------------------------------------------------------------------------------------|----------------|---------|-------------|-------|------------|--------------|----------|-------------|
| <b>EDP840</b><br>1 rare                                                                       | DPB1* 840:01e  | -       | <b>IFQG</b> | EEFA  | AAE        | ILEEK        | M        | GGPM        |
| <b>EDP867</b><br>1 rare                                                                       | DPB1* 867:01Ne | -       | LFQG        | EEFA  | <b>CCG</b> | <b>HPGGE</b> | <b>D</b> | <b>GRAH</b> |
| <i>Both sides of this epitype require RARE alleles, review results to confirm assignment.</i> |                |         |             |       |            |              |          |             |

OR

| EPITYPE | ALLELES | P GROUP | HVR-A | HVR-B | HVR-C | HVR-D | HVR-E | HVR-F |
|---------|---------|---------|-------|-------|-------|-------|-------|-------|
|---------|---------|---------|-------|-------|-------|-------|-------|-------|

|                                                                                               |               |   |      |      |     |       |   |      |
|-----------------------------------------------------------------------------------------------|---------------|---|------|------|-----|-------|---|------|
| <b>EDP177</b><br>1 rare                                                                       | DPB1* 177:01e | - | LFQG | EEFA | AAE | ILEEK | M | SGPM |
| <b>EDP747</b><br>1 rare                                                                       | DPB1* 747:01e | - | VFQG | EEFA | AAE | ILEEK | M | GGPM |
| <i>Both sides of this epitype require RARE alleles, review results to confirm assignment.</i> |               |   |      |      |     |       |   |      |

OR

| EPITYPE                                                                                       | ALLELES        | P GROUP | HVR-A | HVR-B | HVR-C | HVR-D | HVR-E | HVR-F |
|-----------------------------------------------------------------------------------------------|----------------|---------|-------|-------|-------|-------|-------|-------|
| <b>EDP177</b><br>1 rare                                                                       | DPB1* 177:01e  | -       | LFQG  | EEFA  | AAE   | ILEEK | M     | SGPM  |
| <b>EDP1122</b><br>1 rare                                                                      | DPB1* 1122:01e | -       | LFQG  | EECA  | AAE   | ILEEK | M     | GGPM  |
| <i>Both sides of this epitype require RARE alleles, review results to confirm assignment.</i> |                |         |       |       |       |       |       |       |

OR

| EPITYPE                                                                                       | ALLELES       | P GROUP | HVR-A | HVR-B | HVR-C | HVR-D | HVR-E | HVR-F |
|-----------------------------------------------------------------------------------------------|---------------|---------|-------|-------|-------|-------|-------|-------|
| <b>EDP177</b><br>1 rare                                                                       | DPB1* 177:01e | -       | LFQG  | EEFA  | AAE   | ILEEK | M     | SGPM  |
| <b>EDP280</b><br>1 rare                                                                       | DPB1* 280:01e | -       | LFQG  | EEFA  | AAE   | ILEEK | M     | GAPM  |
| <i>Both sides of this epitype require RARE alleles, review results to confirm assignment.</i> |               |         |       |       |       |       |       |       |

OR

| EPITYPE                                                                                       | ALLELES       | P GROUP | HVR-A | HVR-B | HVR-C | HVR-D | HVR-E | HVR-F |
|-----------------------------------------------------------------------------------------------|---------------|---------|-------|-------|-------|-------|-------|-------|
| <b>EDP177</b><br>1 rare                                                                       | DPB1* 177:01e | -       | LFQG  | EEFA  | AAE   | ILEEK | M     | SGPM  |
| <b>EDP230</b><br>1 rare                                                                       | DPB1* 230:01e | -       | LFQG  | EEFA  | AAE   | ILEEK | M     | GWPM  |
| <i>Both sides of this epitype require RARE alleles, review results to confirm assignment.</i> |               |         |       |       |       |       |       |       |

OR

| EPITYPE | ALLELES | P GROUP | HVR-A | HVR-B | HVR-C | HVR-D | HVR-E | HVR-F |
|---------|---------|---------|-------|-------|-------|-------|-------|-------|
|---------|---------|---------|-------|-------|-------|-------|-------|-------|

|                                                                                               |                |   |      |      |     |       |   |             |
|-----------------------------------------------------------------------------------------------|----------------|---|------|------|-----|-------|---|-------------|
| <b>EDP177</b><br>1 rare                                                                       | DPB1* 177:01e  | - | LFQG | EEFA | AAE | ILEEK | M | <b>SGPM</b> |
| <b>EDP570</b><br>1 rare                                                                       | DPB1* 911:01Ne | - | -    | -    | -   | -     | - | -           |
| <i>Both sides of this epitype require RARE alleles, review results to confirm assignment.</i> |                |   |      |      |     |       |   |             |

OR

| EPITYPE                                                                                       | ALLELES       | P GROUP | HVR-A | HVR-B | HVR-C | HVR-D | HVR-E | HVR-F       |
|-----------------------------------------------------------------------------------------------|---------------|---------|-------|-------|-------|-------|-------|-------------|
| <b>EDP177</b><br>1 rare                                                                       | DPB1* 177:01e | -       | LFQG  | EEFA  | AAE   | ILEEK | M     | <b>SGPM</b> |
| <b>EDP840</b><br>1 rare                                                                       | DPB1* 840:01e | -       | IFQG  | EEFA  | AAE   | ILEEK | M     | <b>GGPM</b> |
| <i>Both sides of this epitype require RARE alleles, review results to confirm assignment.</i> |               |         |       |       |       |       |       |             |

OR

| EPITYPE                                                                                       | ALLELES        | P GROUP | HVR-A | HVR-B | HVR-C | HVR-D | HVR-E | HVR-F       |
|-----------------------------------------------------------------------------------------------|----------------|---------|-------|-------|-------|-------|-------|-------------|
| <b>EDP747</b><br>1 rare                                                                       | DPB1* 747:01e  | -       | VFQG  | EEFA  | AAE   | ILEEK | M     | <b>GGPM</b> |
| <b>EDP1122</b><br>1 rare                                                                      | DPB1* 1122:01e | -       | LFQG  | EECA  | AAE   | ILEEK | M     | <b>GGPM</b> |
| <i>Both sides of this epitype require RARE alleles, review results to confirm assignment.</i> |                |         |       |       |       |       |       |             |

OR

| EPITYPE                                                                                       | ALLELES       | P GROUP | HVR-A | HVR-B | HVR-C | HVR-D | HVR-E | HVR-F       |
|-----------------------------------------------------------------------------------------------|---------------|---------|-------|-------|-------|-------|-------|-------------|
| <b>EDP280</b><br>1 rare                                                                       | DPB1* 280:01e | -       | LFQG  | EEFA  | AAE   | ILEEK | M     | <b>GAPM</b> |
| <b>EDP747</b><br>1 rare                                                                       | DPB1* 747:01e | -       | VFQG  | EEFA  | AAE   | ILEEK | M     | <b>GGPM</b> |
| <i>Both sides of this epitype require RARE alleles, review results to confirm assignment.</i> |               |         |       |       |       |       |       |             |

OR

| EPITYPE | ALLELES | P GROUP | HVR-A | HVR-B | HVR-C | HVR-D | HVR-E | HVR-F |
|---------|---------|---------|-------|-------|-------|-------|-------|-------|
|---------|---------|---------|-------|-------|-------|-------|-------|-------|



|                                                                                               |               |   |      |      |     |       |   |      |
|-----------------------------------------------------------------------------------------------|---------------|---|------|------|-----|-------|---|------|
| <b>EDP230</b><br>1 rare                                                                       | DPB1* 230:01e | - | LFQG | EEFA | AAE | ILEEK | M | GWPM |
| <b>EDP747</b><br>1 rare                                                                       | DPB1* 747:01e | - | VFQG | EEFA | AAE | ILEEK | M | GGPM |
| <i>Both sides of this epitype require RARE alleles, review results to confirm assignment.</i> |               |   |      |      |     |       |   |      |

OR

| EPITYPE                                                                                       | ALLELES        | P GROUP | HVR-A | HVR-B | HVR-C | HVR-D | HVR-E | HVR-F |
|-----------------------------------------------------------------------------------------------|----------------|---------|-------|-------|-------|-------|-------|-------|
| <b>EDP570</b><br>1 rare                                                                       | DPB1* 911:01Ne | -       | -     | -     | -     | -     | -     | -     |
| <b>EDP747</b><br>1 rare                                                                       | DPB1* 747:01e  | -       | VFQG  | EEFA  | AAE   | ILEEK | M     | GGPM  |
| <i>Both sides of this epitype require RARE alleles, review results to confirm assignment.</i> |                |         |       |       |       |       |       |       |

OR

| EPITYPE                                                                                       | ALLELES       | P GROUP | HVR-A | HVR-B | HVR-C | HVR-D | HVR-E | HVR-F |
|-----------------------------------------------------------------------------------------------|---------------|---------|-------|-------|-------|-------|-------|-------|
| <b>EDP747</b><br>1 rare                                                                       | DPB1* 747:01e | -       | VFQG  | EEFA  | AAE   | ILEEK | M     | GGPM  |
| <b>EDP840</b><br>1 rare                                                                       | DPB1* 840:01e | -       | IFQG  | EEFA  | AAE   | ILEEK | M     | GGPM  |
| <i>Both sides of this epitype require RARE alleles, review results to confirm assignment.</i> |               |         |       |       |       |       |       |       |

OR

| EPITYPE                                                                                       | ALLELES        | P GROUP | HVR-A | HVR-B | HVR-C | HVR-D | HVR-E | HVR-F |
|-----------------------------------------------------------------------------------------------|----------------|---------|-------|-------|-------|-------|-------|-------|
| <b>EDP280</b><br>1 rare                                                                       | DPB1* 280:01e  | -       | LFQG  | EEFA  | AAE   | ILEEK | M     | GAPM  |
| <b>EDP1122</b><br>1 rare                                                                      | DPB1* 1122:01e | -       | LFQG  | EECA  | AAE   | ILEEK | M     | GGPM  |
| <i>Both sides of this epitype require RARE alleles, review results to confirm assignment.</i> |                |         |       |       |       |       |       |       |

OR

| EPITYPE | ALLELES | P GROUP | HVR-A | HVR-B | HVR-C | HVR-D | HVR-E | HVR-F |
|---------|---------|---------|-------|-------|-------|-------|-------|-------|
|---------|---------|---------|-------|-------|-------|-------|-------|-------|

|                                                                                               |                |   |      |      |     |       |   |      |
|-----------------------------------------------------------------------------------------------|----------------|---|------|------|-----|-------|---|------|
| <b>EDP230</b><br>1 rare                                                                       | DPB1* 230:01e  | - | LFQG | EEFA | AAE | ILEEK | M | GWPM |
| <b>EDP1122</b><br>1 rare                                                                      | DPB1* 1122:01e | - | LFQG | EECA | AAE | ILEEK | M | GGPM |
| <i>Both sides of this epitope require RARE alleles, review results to confirm assignment.</i> |                |   |      |      |     |       |   |      |

OR

| EPITYPE                                                                                       | ALLELES        | P GROUP | HVR-A | HVR-B | HVR-C | HVR-D | HVR-E | HVR-F |
|-----------------------------------------------------------------------------------------------|----------------|---------|-------|-------|-------|-------|-------|-------|
| <b>EDP570</b><br>1 rare                                                                       | DPB1* 911:01Ne | -       | -     | -     | -     | -     | -     | -     |
| <b>EDP1122</b><br>1 rare                                                                      | DPB1* 1122:01e | -       | LFQG  | EECA  | AAE   | ILEEK | M     | GGPM  |
| <i>Both sides of this epitope require RARE alleles, review results to confirm assignment.</i> |                |         |       |       |       |       |       |       |

OR

| EPITYPE                                                                                       | ALLELES        | P GROUP | HVR-A | HVR-B | HVR-C | HVR-D | HVR-E | HVR-F |
|-----------------------------------------------------------------------------------------------|----------------|---------|-------|-------|-------|-------|-------|-------|
| <b>EDP840</b><br>1 rare                                                                       | DPB1* 840:01e  | -       | IFQG  | EEFA  | AAE   | ILEEK | M     | GGPM  |
| <b>EDP1122</b><br>1 rare                                                                      | DPB1* 1122:01e | -       | LFQG  | EECA  | AAE   | ILEEK | M     | GGPM  |
| <i>Both sides of this epitope require RARE alleles, review results to confirm assignment.</i> |                |         |       |       |       |       |       |       |

OR

| EPITYPE                                                                                       | ALLELES       | P GROUP | HVR-A | HVR-B | HVR-C | HVR-D | HVR-E | HVR-F |
|-----------------------------------------------------------------------------------------------|---------------|---------|-------|-------|-------|-------|-------|-------|
| <b>EDP230</b><br>1 rare                                                                       | DPB1* 230:01e | -       | LFQG  | EEFA  | AAE   | ILEEK | M     | GWPM  |
| <b>EDP280</b><br>1 rare                                                                       | DPB1* 280:01e | -       | LFQG  | EEFA  | AAE   | ILEEK | M     | GAPM  |
| <i>Both sides of this epitope require RARE alleles, review results to confirm assignment.</i> |               |         |       |       |       |       |       |       |

OR

| EPITYPE | ALLELES | P GROUP | HVR-A | HVR-B | HVR-C | HVR-D | HVR-E | HVR-F |
|---------|---------|---------|-------|-------|-------|-------|-------|-------|
|---------|---------|---------|-------|-------|-------|-------|-------|-------|

|                                                                                               |                |   |      |      |     |       |   |             |
|-----------------------------------------------------------------------------------------------|----------------|---|------|------|-----|-------|---|-------------|
| <b>EDP280</b><br>1 rare                                                                       | DPB1* 280:01e  | - | LFQG | EEFA | AAE | ILEEK | M | <b>GAPM</b> |
| <b>EDP570</b><br>1 rare                                                                       | DPB1* 911:01Ne | - | -    | -    | -   | -     | - | -           |
| <i>Both sides of this epitype require RARE alleles, review results to confirm assignment.</i> |                |   |      |      |     |       |   |             |

OR

| EPITYPE                                                                                       | ALLELES       | P GROUP | HVR-A | HVR-B | HVR-C | HVR-D | HVR-E | HVR-F       |
|-----------------------------------------------------------------------------------------------|---------------|---------|-------|-------|-------|-------|-------|-------------|
| <b>EDP280</b><br>1 rare                                                                       | DPB1* 280:01e | -       | LFQG  | EEFA  | AAE   | ILEEK | M     | <b>GAPM</b> |
| <b>EDP840</b><br>1 rare                                                                       | DPB1* 840:01e | -       | IFQG  | EEFA  | AAE   | ILEEK | M     | <b>GGPM</b> |
| <i>Both sides of this epitype require RARE alleles, review results to confirm assignment.</i> |               |         |       |       |       |       |       |             |

OR

| EPITYPE                                                                                       | ALLELES        | P GROUP | HVR-A | HVR-B | HVR-C | HVR-D | HVR-E | HVR-F       |
|-----------------------------------------------------------------------------------------------|----------------|---------|-------|-------|-------|-------|-------|-------------|
| <b>EDP230</b><br>1 rare                                                                       | DPB1* 230:01e  | -       | LFQG  | EEFA  | AAE   | ILEEK | M     | <b>GWPM</b> |
| <b>EDP570</b><br>1 rare                                                                       | DPB1* 911:01Ne | -       | -     | -     | -     | -     | -     | -           |
| <i>Both sides of this epitype require RARE alleles, review results to confirm assignment.</i> |                |         |       |       |       |       |       |             |

OR

| EPITYPE                                                                                       | ALLELES       | P GROUP | HVR-A | HVR-B | HVR-C | HVR-D | HVR-E | HVR-F       |
|-----------------------------------------------------------------------------------------------|---------------|---------|-------|-------|-------|-------|-------|-------------|
| <b>EDP230</b><br>1 rare                                                                       | DPB1* 230:01e | -       | LFQG  | EEFA  | AAE   | ILEEK | M     | <b>GWPM</b> |
| <b>EDP840</b><br>1 rare                                                                       | DPB1* 840:01e | -       | IFQG  | EEFA  | AAE   | ILEEK | M     | <b>GGPM</b> |
| <i>Both sides of this epitype require RARE alleles, review results to confirm assignment.</i> |               |         |       |       |       |       |       |             |

OR

| EPITYPE | ALLELES | P GROUP | HVR-A | HVR-B | HVR-C | HVR-D | HVR-E | HVR-F |
|---------|---------|---------|-------|-------|-------|-------|-------|-------|
|---------|---------|---------|-------|-------|-------|-------|-------|-------|

|                                                                                               |                |   |      |      |     |       |   |      |
|-----------------------------------------------------------------------------------------------|----------------|---|------|------|-----|-------|---|------|
| <b>EDP570</b><br>1 rare                                                                       | DPB1* 911:01Ne | - | -    | -    | -   | -     | - | -    |
| <b>EDP840</b><br>1 rare                                                                       | DPB1* 840:01e  | - | IFQG | EEFA | AAE | ILEEK | M | GGPM |
| <i>Both sides of this epitype require RARE alleles, review results to confirm assignment.</i> |                |   |      |      |     |       |   |      |

OR

| EPITYPE                                                                                                                                                  | ALLELES       | P GROUP | HVR-A | HVR-B | HVR-C | HVR-D | HVR-E | HVR-F |
|----------------------------------------------------------------------------------------------------------------------------------------------------------|---------------|---------|-------|-------|-------|-------|-------|-------|
| <b>EDP828</b><br>1 rare                                                                                                                                  | DPB1* 828:01e | -       | LFQG  | DEFA  | AAE   | ILEEK | M     | GGPM  |
| <b>EDP828</b><br>1 rare                                                                                                                                  | DPB1* 828:01e | -       | LFQG  | DEFA  | AAE   | ILEEK | M     | GGPM  |
| <i>This genotype consists of alleles from a single group.<br/>One side of this epitype requires a RARE allele, review results to confirm assignment.</i> |               |         |       |       |       |       |       |       |

OR

| EPITYPE                                                                                                                                                  | ALLELES       | P GROUP | HVR-A | HVR-B | HVR-C | HVR-D | HVR-E | HVR-F |
|----------------------------------------------------------------------------------------------------------------------------------------------------------|---------------|---------|-------|-------|-------|-------|-------|-------|
| <b>EDP318</b><br>1 rare                                                                                                                                  | DPB1* 318:01e | -       | LFQG  | EEFT  | AAE   | ILEEK | M     | GGPM  |
| <b>EDP318</b><br>1 rare                                                                                                                                  | DPB1* 318:01e | -       | LFQG  | EEFT  | AAE   | ILEEK | M     | GGPM  |
| <i>This genotype consists of alleles from a single group.<br/>One side of this epitype requires a RARE allele, review results to confirm assignment.</i> |               |         |       |       |       |       |       |       |

OR

| EPITYPE                                                                                                                                                  | ALLELES       | P GROUP | HVR-A | HVR-B | HVR-C | HVR-D | HVR-E | HVR-F |
|----------------------------------------------------------------------------------------------------------------------------------------------------------|---------------|---------|-------|-------|-------|-------|-------|-------|
| <b>EDP178</b><br>1 rare                                                                                                                                  | DPB1* 178:01e | -       | LFQG  | EEFA  | AAE   | ILEEK | M     | GGPV  |
| <b>EDP178</b><br>1 rare                                                                                                                                  | DPB1* 178:01e | -       | LFQG  | EEFA  | AAE   | ILEEK | M     | GGPV  |
| <i>This genotype consists of alleles from a single group.<br/>One side of this epitype requires a RARE allele, review results to confirm assignment.</i> |               |         |       |       |       |       |       |       |

OR

| EPITYPE | ALLELES | P GROUP | HVR-A | HVR-B | HVR-C | HVR-D | HVR-E | HVR-F |
|---------|---------|---------|-------|-------|-------|-------|-------|-------|
|---------|---------|---------|-------|-------|-------|-------|-------|-------|

|                         |               |   |      |      |     |       |   |      |
|-------------------------|---------------|---|------|------|-----|-------|---|------|
| <b>EDP375</b><br>1 rare | DPB1* 375:01e | - | LFQG | QEFA | AAE | ILEEK | M | GGPM |
| <b>EDP375</b><br>1 rare | DPB1* 375:01e | - | LFQG | QEFA | AAE | ILEEK | M | GGPM |

*This genotype consists of alleles from a single group.  
One side of this epitype requires a RARE allele, review results to confirm assignment.*

OR

| EPITYPE                 | ALLELES       | P GROUP | HVR-A | HVR-B | HVR-C | HVR-D | HVR-E | HVR-F |
|-------------------------|---------------|---------|-------|-------|-------|-------|-------|-------|
| <b>EDP686</b><br>1 rare | DPB1* 686:01e | -       | LFQG  | EGFA  | AAE   | ILEEK | M     | GGPM  |
| <b>EDP686</b><br>1 rare | DPB1* 686:01e | -       | LFQG  | EGFA  | AAE   | ILEEK | M     | GGPM  |

*This genotype consists of alleles from a single group.  
One side of this epitype requires a RARE allele, review results to confirm assignment.*

OR

| EPITYPE                 | ALLELES       | P GROUP | HVR-A | HVR-B | HVR-C | HVR-D | HVR-E | HVR-F |
|-------------------------|---------------|---------|-------|-------|-------|-------|-------|-------|
| <b>EDP176</b><br>1 rare | DPB1* 176:01e | -       | LFQG  | EEFA  | AAE   | ILKEK | M     | GGPM  |
| <b>EDP176</b><br>1 rare | DPB1* 176:01e | -       | LFQG  | EEFA  | AAE   | ILKEK | M     | GGPM  |

*This genotype consists of alleles from a single group.  
One side of this epitype requires a RARE allele, review results to confirm assignment.*

OR

| EPITYPE                 | ALLELES       | P GROUP | HVR-A | HVR-B | HVR-C | HVR-D | HVR-E | HVR-F |
|-------------------------|---------------|---------|-------|-------|-------|-------|-------|-------|
| <b>EDP456</b><br>1 rare | DPB1* 456:01e | -       | LFQG  | EEFA  | AAE   | ILEVK | M     | GGPM  |
| <b>EDP456</b><br>1 rare | DPB1* 456:01e | -       | LFQG  | EEFA  | AAE   | ILEVK | M     | GGPM  |

*This genotype consists of alleles from a single group.  
One side of this epitype requires a RARE allele, review results to confirm assignment.*

OR

| EPITYPE                  | ALLELES        | P GROUP | HVR-A | HVR-B | HVR-C | HVR-D | HVR-E | HVR-F |
|--------------------------|----------------|---------|-------|-------|-------|-------|-------|-------|
| <b>EDP1097</b><br>1 rare | DPB1* 1097:01e | -       | LFLG  | EEFA  | AAE   | ILEEK | M     | GGPM  |
| <b>EDP1097</b><br>1 rare | DPB1* 1097:01e | -       | LFLG  | EEFA  | AAE   | ILEEK | M     | GGPM  |

*This genotype consists of alleles from a single group.  
One side of this epitype requires a RARE allele, review results to confirm assignment.*

OR

| EPITYPE                 | ALLELES       | P GROUP | HVR-A | HVR-B | HVR-C | HVR-D | HVR-E | HVR-F |
|-------------------------|---------------|---------|-------|-------|-------|-------|-------|-------|
| <b>EDP303</b><br>1 rare | DPB1* 303:01e | -       | LFQG  | EEFA  | AAE   | ILEER | M     | GGPM  |
| <b>EDP303</b><br>1 rare | DPB1* 303:01e | -       | LFQG  | EEFA  | AAE   | ILEER | M     | GGPM  |

*This genotype consists of alleles from a single group.  
One side of this epitype requires a RARE allele, review results to confirm assignment.*

OR

| EPITYPE                 | ALLELES       | P GROUP | HVR-A | HVR-B | HVR-C | HVR-D | HVR-E | HVR-F |
|-------------------------|---------------|---------|-------|-------|-------|-------|-------|-------|
| <b>EDP753</b><br>1 rare | DPB1* 753:01e | -       | FFQG  | EEFA  | AAE   | ILEEK | M     | GGPM  |
| <b>EDP753</b><br>1 rare | DPB1* 753:01e | -       | FFQG  | EEFA  | AAE   | ILEEK | M     | GGPM  |

*This genotype consists of alleles from a single group.  
One side of this epitype requires a RARE allele, review results to confirm assignment.*

OR

| EPITYPE                 | ALLELES       | P GROUP | HVR-A | HVR-B | HVR-C | HVR-D | HVR-E | HVR-F |
|-------------------------|---------------|---------|-------|-------|-------|-------|-------|-------|
| <b>EDP254</b><br>1 rare | DPB1* 254:01e | -       | LFQG  | EEFA  | AVE   | ILEEK | M     | GGPM  |
| <b>EDP254</b><br>1 rare | DPB1* 254:01e | -       | LFQG  | EEFA  | AVE   | ILEEK | M     | GGPM  |

*This genotype consists of alleles from a single group.  
One side of this epitype requires a RARE allele, review results to confirm assignment.*

OR

| EPITYPE                 | ALLELES       | P GROUP | HVR-A | HVR-B | HVR-C | HVR-D | HVR-E | HVR-F |
|-------------------------|---------------|---------|-------|-------|-------|-------|-------|-------|
| <b>EDP454</b><br>1 rare | DPB1* 454:01e | -       | LFQG  | EEFA  | AAE   | ILEEK | M     | GEPM  |
| <b>EDP454</b><br>1 rare | DPB1* 454:01e | -       | LFQG  | EEFA  | AAE   | ILEEK | M     | GEPM  |

*This genotype consists of alleles from a single group.  
One side of this epitype requires a RARE allele, review results to confirm assignment.*

OR

| EPITYPE                  | ALLELES        | P GROUP | HVR-A | HVR-B | HVR-C | HVR-D | HVR-E | HVR-F |
|--------------------------|----------------|---------|-------|-------|-------|-------|-------|-------|
| <b>EDP1046</b><br>1 rare | DPB1* 1046:01e | -       | LFQG  | EEIA  | AAE   | ILEEK | M     | GGPM  |
| <b>EDP1046</b><br>1 rare | DPB1* 1046:01e | -       | LFQG  | EEIA  | AAE   | ILEEK | M     | GGPM  |

*This genotype consists of alleles from a single group.  
One side of this epitype requires a RARE allele, review results to confirm assignment.*

OR

| EPITYPE                 | ALLELES       | P GROUP | HVR-A | HVR-B | HVR-C | HVR-D | HVR-E | HVR-F |
|-------------------------|---------------|---------|-------|-------|-------|-------|-------|-------|
| <b>EDP921</b><br>1 rare | DPB1* 921:01e | -       | LFQG  | GEFA  | AAE   | ILEEK | M     | GGPM  |
| <b>EDP921</b><br>1 rare | DPB1* 921:01e | -       | LFQG  | GEFA  | AAE   | ILEEK | M     | GGPM  |

*This genotype consists of alleles from a single group.  
One side of this epitype requires a RARE allele, review results to confirm assignment.*

OR

| EPITYPE                 | ALLELES        | P GROUP | HVR-A | HVR-B | HVR-C | HVR-D | HVR-E | HVR-F |
|-------------------------|----------------|---------|-------|-------|-------|-------|-------|-------|
| <b>EDP871</b><br>1 rare | DPB1* 871:01Ne | -       | LFQG  | EEFA  | AAE   | HPGGE | D     | GRAH  |
| <b>EDP871</b><br>1 rare | DPB1* 871:01Ne | -       | LFQG  | EEFA  | AAE   | HPGGE | D     | GRAH  |

*This genotype consists of alleles from a single group.  
One side of this epitype requires a RARE allele, review results to confirm assignment.*

OR

| EPITYPE                 | ALLELES       | P GROUP | HVR-A | HVR-B | HVR-C | HVR-D | HVR-E | HVR-F |
|-------------------------|---------------|---------|-------|-------|-------|-------|-------|-------|
| <b>EDP399</b><br>1 rare | DPB1* 399:01e | -       | LFQG  | EEFA  | AAE   | IVEEK | M     | GGPM  |
| <b>EDP399</b><br>1 rare | DPB1* 399:01e | -       | LFQG  | EEFA  | AAE   | IVEEK | M     | GGPM  |

*This genotype consists of alleles from a single group.  
One side of this epitype requires a RARE allele, review results to confirm assignment.*

OR

| EPITYPE                 | ALLELES       | P GROUP | HVR-A | HVR-B | HVR-C | HVR-D | HVR-E | HVR-F |
|-------------------------|---------------|---------|-------|-------|-------|-------|-------|-------|
| <b>EDP319</b><br>1 rare | DPB1* 319:01e | -       | LFQG  | EEFA  | AAE   | IQEEK | M     | GGPM  |
| <b>EDP319</b><br>1 rare | DPB1* 319:01e | -       | LFQG  | EEFA  | AAE   | IQEEK | M     | GGPM  |

*This genotype consists of alleles from a single group.  
One side of this epitype requires a RARE allele, review results to confirm assignment.*

OR

| EPITYPE                 | ALLELES       | P GROUP | HVR-A | HVR-B | HVR-C | HVR-D | HVR-E | HVR-F |
|-------------------------|---------------|---------|-------|-------|-------|-------|-------|-------|
| <b>EDP679</b><br>1 rare | DPB1* 679:01e | -       | PFQG  | EEFA  | AAE   | ILEEK | M     | GGPM  |
| <b>EDP679</b><br>1 rare | DPB1* 679:01e | -       | PFQG  | EEFA  | AAE   | ILEEK | M     | GGPM  |

*This genotype consists of alleles from a single group.  
One side of this epitype requires a RARE allele, review results to confirm assignment.*

OR

| EPITYPE                 | ALLELES       | P GROUP | HVR-A | HVR-B | HVR-C | HVR-D | HVR-E | HVR-F |
|-------------------------|---------------|---------|-------|-------|-------|-------|-------|-------|
| <b>EDP592</b><br>1 rare | DPB1* 592:01e | -       | LFQG  | EEFA  | AAE   | ILEEK | M     | GGPR  |
| <b>EDP592</b><br>1 rare | DPB1* 592:01e | -       | LFQG  | EEFA  | AAE   | ILEEK | M     | GGPR  |

*This genotype consists of alleles from a single group.  
One side of this epitype requires a RARE allele, review results to confirm assignment.*

OR



| EPITYPE                  | ALLELES         | P GROUP | HVR-A | HVR-B | HVR-C | HVR-D | HVR-E | HVR-F |
|--------------------------|-----------------|---------|-------|-------|-------|-------|-------|-------|
| <b>EDP1135</b><br>1 rare | DPB1* 1135:01Ne | -       | LFQG  | EEFA  | AAE   | ILGGE | D     | GRAH  |
| <b>EDP1135</b><br>1 rare | DPB1* 1135:01Ne | -       | LFQG  | EEFA  | AAE   | ILGGE | D     | GRAH  |

*This genotype consists of alleles from a single group.  
One side of this epitype requires a RARE allele, review results to confirm assignment.*

OR

| EPITYPE                 | ALLELES       | P GROUP | HVR-A | HVR-B | HVR-C | HVR-D | HVR-E | HVR-F |
|-------------------------|---------------|---------|-------|-------|-------|-------|-------|-------|
| <b>EDP427</b><br>1 rare | DPB1* 427:01e | -       | LFQG  | EEFA  | ATE   | ILEEK | M     | GGPM  |
| <b>EDP427</b><br>1 rare | DPB1* 427:01e | -       | LFQG  | EEFA  | ATE   | ILEEK | M     | GGPM  |

*This genotype consists of alleles from a single group.  
One side of this epitype requires a RARE allele, review results to confirm assignment.*

OR

| EPITYPE                 | ALLELES        | P GROUP | HVR-A | HVR-B | HVR-C | HVR-D | HVR-E | HVR-F |
|-------------------------|----------------|---------|-------|-------|-------|-------|-------|-------|
| <b>EDP867</b><br>1 rare | DPB1* 867:01Ne | -       | LFQG  | EEFA  | CCG   | HPGGE | D     | GRAH  |
| <b>EDP867</b><br>1 rare | DPB1* 867:01Ne | -       | LFQG  | EEFA  | CCG   | HPGGE | D     | GRAH  |

*This genotype consists of alleles from a single group.  
One side of this epitype requires a RARE allele, review results to confirm assignment.*

OR

| EPITYPE                 | ALLELES       | P GROUP | HVR-A | HVR-B | HVR-C | HVR-D | HVR-E | HVR-F |
|-------------------------|---------------|---------|-------|-------|-------|-------|-------|-------|
| <b>EDP177</b><br>1 rare | DPB1* 177:01e | -       | LFQG  | EEFA  | AAE   | ILEEK | M     | SGPM  |
| <b>EDP177</b><br>1 rare | DPB1* 177:01e | -       | LFQG  | EEFA  | AAE   | ILEEK | M     | SGPM  |

*This genotype consists of alleles from a single group.  
One side of this epitype requires a RARE allele, review results to confirm assignment.*

OR

| EPITYPE                 | ALLELES       | P GROUP | HVR-A | HVR-B | HVR-C | HVR-D | HVR-E | HVR-F |
|-------------------------|---------------|---------|-------|-------|-------|-------|-------|-------|
| <b>EDP747</b><br>1 rare | DPB1* 747:01e | -       | VFQG  | EEFA  | AAE   | ILEEK | M     | GGPM  |
| <b>EDP747</b><br>1 rare | DPB1* 747:01e | -       | VFQG  | EEFA  | AAE   | ILEEK | M     | GGPM  |

*This genotype consists of alleles from a single group.  
One side of this epitype requires a RARE allele, review results to confirm assignment.*

OR

| EPITYPE                 | ALLELES       | P GROUP | HVR-A | HVR-B | HVR-C | HVR-D | HVR-E | HVR-F |
|-------------------------|---------------|---------|-------|-------|-------|-------|-------|-------|
| <b>EDP280</b><br>1 rare | DPB1* 280:01e | -       | LFQG  | EEFA  | AAE   | ILEEK | M     | GAPM  |
| <b>EDP280</b><br>1 rare | DPB1* 280:01e | -       | LFQG  | EEFA  | AAE   | ILEEK | M     | GAPM  |

*This genotype consists of alleles from a single group.  
One side of this epitype requires a RARE allele, review results to confirm assignment.*

OR

| EPITYPE                 | ALLELES       | P GROUP | HVR-A | HVR-B | HVR-C | HVR-D | HVR-E | HVR-F |
|-------------------------|---------------|---------|-------|-------|-------|-------|-------|-------|
| <b>EDP230</b><br>1 rare | DPB1* 230:01e | -       | LFQG  | EEFA  | AAE   | ILEEK | M     | GWPM  |
| <b>EDP230</b><br>1 rare | DPB1* 230:01e | -       | LFQG  | EEFA  | AAE   | ILEEK | M     | GWPM  |

*This genotype consists of alleles from a single group.  
One side of this epitype requires a RARE allele, review results to confirm assignment.*

OR

| EPITYPE                 | ALLELES        | P GROUP | HVR-A | HVR-B | HVR-C | HVR-D | HVR-E | HVR-F |
|-------------------------|----------------|---------|-------|-------|-------|-------|-------|-------|
| <b>EDP570</b><br>1 rare | DPB1* 911:01Ne | -       | -     | -     | -     | -     | -     | -     |
| <b>EDP570</b><br>1 rare | DPB1* 911:01Ne | -       | -     | -     | -     | -     | -     | -     |

*This genotype consists of alleles from a single group.  
One side of this epitype requires a RARE allele, review results to confirm assignment.*

OR

| EPITYPE                 | ALLELES       | P GROUP | HVR-A | HVR-B | HVR-C | HVR-D | HVR-E | HVR-F |
|-------------------------|---------------|---------|-------|-------|-------|-------|-------|-------|
| <b>EDP840</b><br>1 rare | DPB1* 840:01e | -       | IFQG  | EEFA  | AAE   | ILEEK | M     | GGPM  |
| <b>EDP840</b><br>1 rare | DPB1* 840:01e | -       | IFQG  | EEFA  | AAE   | ILEEK | M     | GGPM  |

*This genotype consists of alleles from a single group.  
One side of this epitype requires a RARE allele, review results to confirm assignment.*

OR

| EPITYPE                 | ALLELES       | P GROUP | HVR-A | HVR-B | HVR-C | HVR-D | HVR-E | HVR-F |
|-------------------------|---------------|---------|-------|-------|-------|-------|-------|-------|
| <b>EDP318</b><br>1 rare | DPB1* 318:01e | -       | LFQG  | EEFT  | AAE   | ILEEK | M     | GGPM  |
| <b>EDP828</b><br>1 rare | DPB1* 828:01e | -       | LFQG  | DEFA  | AAE   | ILEEK | M     | GGPM  |

*Both sides of this epitype require RARE alleles, review results to confirm assignment.*

OR

| EPITYPE                 | ALLELES       | P GROUP | HVR-A | HVR-B | HVR-C | HVR-D | HVR-E | HVR-F |
|-------------------------|---------------|---------|-------|-------|-------|-------|-------|-------|
| <b>EDP178</b><br>1 rare | DPB1* 178:01e | -       | LFQG  | EEFA  | AAE   | ILEEK | M     | GGPV  |
| <b>EDP828</b><br>1 rare | DPB1* 828:01e | -       | LFQG  | DEFA  | AAE   | ILEEK | M     | GGPM  |

*Both sides of this epitype require RARE alleles, review results to confirm assignment.*

OR

| EPITYPE                 | ALLELES       | P GROUP | HVR-A | HVR-B | HVR-C | HVR-D | HVR-E | HVR-F |
|-------------------------|---------------|---------|-------|-------|-------|-------|-------|-------|
| <b>EDP278</b><br>1 rare | DPB1* 278:01e | -       | LFQG  | EEFA  | AAE   | ILEEK | I     | GGPM  |
| <b>EDP828</b><br>1 rare | DPB1* 828:01e | -       | LFQG  | DEFA  | AAE   | ILEEK | M     | GGPM  |

*Both sides of this epitype require RARE alleles, review results to confirm assignment.*

OR

| EPITYPE                 | ALLELES        | P GROUP | HVR-A | HVR-B | HVR-C | HVR-D | HVR-E | HVR-F |
|-------------------------|----------------|---------|-------|-------|-------|-------|-------|-------|
| <b>EDP828</b><br>1 rare | DPB1* 828:01e  | -       | LFQG  | DEFA  | AAE   | ILEEK | M     | GGPM  |
| <b>EDP875</b><br>1 rare | DPB1* 875:01Ne | -       | FSRD  | RSSR  | -     | -     | -     | -     |

*Both sides of this epitype require RARE alleles, review results to confirm assignment.*

OR

| EPITYPE                 | ALLELES       | P GROUP | HVR-A | HVR-B | HVR-C | HVR-D | HVR-E | HVR-F |
|-------------------------|---------------|---------|-------|-------|-------|-------|-------|-------|
| <b>EDP375</b><br>1 rare | DPB1* 375:01e | -       | LFQG  | QEFA  | AAE   | ILEEK | M     | GGPM  |
| <b>EDP828</b><br>1 rare | DPB1* 828:01e | -       | LFQG  | DEFA  | AAE   | ILEEK | M     | GGPM  |

*Both sides of this epitype require RARE alleles, review results to confirm assignment.*

OR

| EPITYPE                 | ALLELES       | P GROUP | HVR-A | HVR-B | HVR-C | HVR-D | HVR-E | HVR-F |
|-------------------------|---------------|---------|-------|-------|-------|-------|-------|-------|
| <b>EDP686</b><br>1 rare | DPB1* 686:01e | -       | LFQG  | EGFA  | AAE   | ILEEK | M     | GGPM  |
| <b>EDP828</b><br>1 rare | DPB1* 828:01e | -       | LFQG  | DEFA  | AAE   | ILEEK | M     | GGPM  |

*Both sides of this epitype require RARE alleles, review results to confirm assignment.*

OR

| EPITYPE                 | ALLELES       | P GROUP | HVR-A | HVR-B | HVR-C | HVR-D | HVR-E | HVR-F |
|-------------------------|---------------|---------|-------|-------|-------|-------|-------|-------|
| <b>EDP176</b><br>1 rare | DPB1* 176:01e | -       | LFQG  | EEFA  | AAE   | ILKEK | M     | GGPM  |
| <b>EDP828</b><br>1 rare | DPB1* 828:01e | -       | LFQG  | DEFA  | AAE   | ILEEK | M     | GGPM  |

*Both sides of this epitype require RARE alleles, review results to confirm assignment.*

OR

| EPITYPE | ALLELES | P GROUP | HVR-A | HVR-B | HVR-C | HVR-D | HVR-E | HVR-F |
|---------|---------|---------|-------|-------|-------|-------|-------|-------|
|---------|---------|---------|-------|-------|-------|-------|-------|-------|

|                                                                                               |               |   |      |      |     |       |   |      |
|-----------------------------------------------------------------------------------------------|---------------|---|------|------|-----|-------|---|------|
| <b>EDP456</b><br>1 rare                                                                       | DPB1* 456:01e | - | LFQG | EEFA | AAE | ILEVK | M | GGPM |
| <b>EDP828</b><br>1 rare                                                                       | DPB1* 828:01e | - | LFQG | DEFA | AAE | ILEEK | M | GGPM |
| <i>Both sides of this epitype require RARE alleles, review results to confirm assignment.</i> |               |   |      |      |     |       |   |      |

OR

| EPITYPE                                                                                       | ALLELES        | P GROUP | HVR-A | HVR-B | HVR-C | HVR-D | HVR-E | HVR-F |
|-----------------------------------------------------------------------------------------------|----------------|---------|-------|-------|-------|-------|-------|-------|
| <b>EDP828</b><br>1 rare                                                                       | DPB1* 828:01e  | -       | LFQG  | DEFA  | AAE   | ILEEK | M     | GGPM  |
| <b>EDP1097</b><br>1 rare                                                                      | DPB1* 1097:01e | -       | LFLG  | EEFA  | AAE   | ILEEK | M     | GGPM  |
| <i>Both sides of this epitype require RARE alleles, review results to confirm assignment.</i> |                |         |       |       |       |       |       |       |

OR

| EPITYPE                                                                                       | ALLELES       | P GROUP | HVR-A | HVR-B | HVR-C | HVR-D | HVR-E | HVR-F |
|-----------------------------------------------------------------------------------------------|---------------|---------|-------|-------|-------|-------|-------|-------|
| <b>EDP303</b><br>1 rare                                                                       | DPB1* 303:01e | -       | LFQG  | EEFA  | AAE   | ILEER | M     | GGPM  |
| <b>EDP828</b><br>1 rare                                                                       | DPB1* 828:01e | -       | LFQG  | DEFA  | AAE   | ILEEK | M     | GGPM  |
| <i>Both sides of this epitype require RARE alleles, review results to confirm assignment.</i> |               |         |       |       |       |       |       |       |

OR

| EPITYPE                                                                                       | ALLELES       | P GROUP | HVR-A | HVR-B | HVR-C | HVR-D | HVR-E | HVR-F |
|-----------------------------------------------------------------------------------------------|---------------|---------|-------|-------|-------|-------|-------|-------|
| <b>EDP753</b><br>1 rare                                                                       | DPB1* 753:01e | -       | FFQG  | EEFA  | AAE   | ILEEK | M     | GGPM  |
| <b>EDP828</b><br>1 rare                                                                       | DPB1* 828:01e | -       | LFQG  | DEFA  | AAE   | ILEEK | M     | GGPM  |
| <i>Both sides of this epitype require RARE alleles, review results to confirm assignment.</i> |               |         |       |       |       |       |       |       |

OR

| EPITYPE | ALLELES | P GROUP | HVR-A | HVR-B | HVR-C | HVR-D | HVR-E | HVR-F |
|---------|---------|---------|-------|-------|-------|-------|-------|-------|
|---------|---------|---------|-------|-------|-------|-------|-------|-------|

|                                                                                               |                |   |      |      |     |       |   |      |
|-----------------------------------------------------------------------------------------------|----------------|---|------|------|-----|-------|---|------|
| <b>EDP828</b><br>1 rare                                                                       | DPB1* 828:01e  | - | LFQG | DEFA | AAE | ILEEK | M | GGPM |
| <b>EDP934</b><br>1 rare                                                                       | DPB1* 934:01Qe | - | LFQG | EFA  | AAE | ILEEK | M | GGPM |
| <i>Both sides of this epitope require RARE alleles, review results to confirm assignment.</i> |                |   |      |      |     |       |   |      |

OR

| EPITYPE                                                                                       | ALLELES        | P GROUP | HVR-A | HVR-B | HVR-C | HVR-D | HVR-E | HVR-F |
|-----------------------------------------------------------------------------------------------|----------------|---------|-------|-------|-------|-------|-------|-------|
| <b>EDP828</b><br>1 rare                                                                       | DPB1* 828:01e  | -       | LFQG  | DEFA  | AAE   | ILEEK | M     | GGPM  |
| <b>EDP874</b><br>1 rare                                                                       | DPB1* 874:01Ne | -       | LFQG  | EEFA  | AAE   | ILEEK | C     | -     |
| <i>Both sides of this epitope require RARE alleles, review results to confirm assignment.</i> |                |         |       |       |       |       |       |       |

OR

| EPITYPE                                                                                       | ALLELES       | P GROUP | HVR-A | HVR-B | HVR-C | HVR-D | HVR-E | HVR-F |
|-----------------------------------------------------------------------------------------------|---------------|---------|-------|-------|-------|-------|-------|-------|
| <b>EDP254</b><br>1 rare                                                                       | DPB1* 254:01e | -       | LFQG  | EEFA  | AVE   | ILEEK | M     | GGPM  |
| <b>EDP828</b><br>1 rare                                                                       | DPB1* 828:01e | -       | LFQG  | DEFA  | AAE   | ILEEK | M     | GGPM  |
| <i>Both sides of this epitope require RARE alleles, review results to confirm assignment.</i> |               |         |       |       |       |       |       |       |

OR

| EPITYPE                                                                                       | ALLELES       | P GROUP | HVR-A | HVR-B | HVR-C | HVR-D | HVR-E | HVR-F |
|-----------------------------------------------------------------------------------------------|---------------|---------|-------|-------|-------|-------|-------|-------|
| <b>EDP454</b><br>1 rare                                                                       | DPB1* 454:01e | -       | LFQG  | EEFA  | AAE   | ILEEK | M     | GEPM  |
| <b>EDP828</b><br>1 rare                                                                       | DPB1* 828:01e | -       | LFQG  | DEFA  | AAE   | ILEEK | M     | GGPM  |
| <i>Both sides of this epitope require RARE alleles, review results to confirm assignment.</i> |               |         |       |       |       |       |       |       |

OR

| EPITYPE | ALLELES | P GROUP | HVR-A | HVR-B | HVR-C | HVR-D | HVR-E | HVR-F |
|---------|---------|---------|-------|-------|-------|-------|-------|-------|
|---------|---------|---------|-------|-------|-------|-------|-------|-------|

|                                                                                               |                |   |      |      |     |       |   |      |
|-----------------------------------------------------------------------------------------------|----------------|---|------|------|-----|-------|---|------|
| <b>EDP828</b><br>1 rare                                                                       | DPB1* 828:01e  | - | LFQG | DEFA | AAE | ILEEK | M | GGPM |
| <b>EDP1046</b><br>1 rare                                                                      | DPB1* 1046:01e | - | LFQG | EEIA | AAE | ILEEK | M | GGPM |
| <i>Both sides of this epitope require RARE alleles, review results to confirm assignment.</i> |                |   |      |      |     |       |   |      |

OR

| EPITYPE                                                                                       | ALLELES       | P GROUP | HVR-A | HVR-B | HVR-C | HVR-D | HVR-E | HVR-F |
|-----------------------------------------------------------------------------------------------|---------------|---------|-------|-------|-------|-------|-------|-------|
| <b>EDP828</b><br>1 rare                                                                       | DPB1* 828:01e | -       | LFQG  | DEFA  | AAE   | ILEEK | M     | GGPM  |
| <b>EDP921</b><br>1 rare                                                                       | DPB1* 921:01e | -       | LFQG  | GEFA  | AAE   | ILEEK | M     | GGPM  |
| <i>Both sides of this epitope require RARE alleles, review results to confirm assignment.</i> |               |         |       |       |       |       |       |       |

OR

| EPITYPE                                                                                       | ALLELES        | P GROUP | HVR-A | HVR-B | HVR-C | HVR-D | HVR-E | HVR-F |
|-----------------------------------------------------------------------------------------------|----------------|---------|-------|-------|-------|-------|-------|-------|
| <b>EDP828</b><br>1 rare                                                                       | DPB1* 828:01e  | -       | LFQG  | DEFA  | AAE   | ILEEK | M     | GGPM  |
| <b>EDP871</b><br>1 rare                                                                       | DPB1* 871:01Ne | -       | LFQG  | EEFA  | AAE   | HPGGE | D     | GRAH  |
| <i>Both sides of this epitope require RARE alleles, review results to confirm assignment.</i> |                |         |       |       |       |       |       |       |

OR

| EPITYPE                                                                                       | ALLELES       | P GROUP | HVR-A | HVR-B | HVR-C | HVR-D | HVR-E | HVR-F |
|-----------------------------------------------------------------------------------------------|---------------|---------|-------|-------|-------|-------|-------|-------|
| <b>EDP399</b><br>1 rare                                                                       | DPB1* 399:01e | -       | LFQG  | EEFA  | AAE   | IVEEK | M     | GGPM  |
| <b>EDP828</b><br>1 rare                                                                       | DPB1* 828:01e | -       | LFQG  | DEFA  | AAE   | ILEEK | M     | GGPM  |
| <i>Both sides of this epitope require RARE alleles, review results to confirm assignment.</i> |               |         |       |       |       |       |       |       |

OR

| EPITYPE | ALLELES | P GROUP | HVR-A | HVR-B | HVR-C | HVR-D | HVR-E | HVR-F |
|---------|---------|---------|-------|-------|-------|-------|-------|-------|
|---------|---------|---------|-------|-------|-------|-------|-------|-------|

|                                                                                               |               |   |      |      |     |       |   |      |
|-----------------------------------------------------------------------------------------------|---------------|---|------|------|-----|-------|---|------|
| <b>EDP319</b><br>1 rare                                                                       | DPB1* 319:01e | - | LFQG | EEFA | AAE | IQEEK | M | GGPM |
| <b>EDP828</b><br>1 rare                                                                       | DPB1* 828:01e | - | LFQG | DEFA | AAE | ILEEK | M | GGPM |
| <i>Both sides of this epitype require RARE alleles, review results to confirm assignment.</i> |               |   |      |      |     |       |   |      |

OR

| EPITYPE                                                                                       | ALLELES       | P GROUP | HVR-A | HVR-B | HVR-C | HVR-D | HVR-E | HVR-F |
|-----------------------------------------------------------------------------------------------|---------------|---------|-------|-------|-------|-------|-------|-------|
| <b>EDP179</b><br>1 rare                                                                       | DPB1* 179:01e | -       | LFQG  | EEFA  | AAE   | LLEER | M     | GGPM  |
| <b>EDP828</b><br>1 rare                                                                       | DPB1* 828:01e | -       | LFQG  | DEFA  | AAE   | ILEEK | M     | GGPM  |
| <i>Both sides of this epitype require RARE alleles, review results to confirm assignment.</i> |               |         |       |       |       |       |       |       |

OR

| EPITYPE                                                                                       | ALLELES       | P GROUP | HVR-A | HVR-B | HVR-C | HVR-D | HVR-E | HVR-F |
|-----------------------------------------------------------------------------------------------|---------------|---------|-------|-------|-------|-------|-------|-------|
| <b>EDP679</b><br>1 rare                                                                       | DPB1* 679:01e | -       | PFQG  | EEFA  | AAE   | ILEEK | M     | GGPM  |
| <b>EDP828</b><br>1 rare                                                                       | DPB1* 828:01e | -       | LFQG  | DEFA  | AAE   | ILEEK | M     | GGPM  |
| <i>Both sides of this epitype require RARE alleles, review results to confirm assignment.</i> |               |         |       |       |       |       |       |       |

OR

| EPITYPE                                                                                       | ALLELES       | P GROUP | HVR-A | HVR-B | HVR-C | HVR-D | HVR-E | HVR-F |
|-----------------------------------------------------------------------------------------------|---------------|---------|-------|-------|-------|-------|-------|-------|
| <b>EDP592</b><br>1 rare                                                                       | DPB1* 592:01e | -       | LFQG  | EEFA  | AAE   | ILEEK | M     | GGPR  |
| <b>EDP828</b><br>1 rare                                                                       | DPB1* 828:01e | -       | LFQG  | DEFA  | AAE   | ILEEK | M     | GGPM  |
| <i>Both sides of this epitype require RARE alleles, review results to confirm assignment.</i> |               |         |       |       |       |       |       |       |

OR

| EPITYPE | ALLELES | P GROUP | HVR-A | HVR-B | HVR-C | HVR-D | HVR-E | HVR-F |
|---------|---------|---------|-------|-------|-------|-------|-------|-------|
|---------|---------|---------|-------|-------|-------|-------|-------|-------|



|                                                                                               |               |   |      |      |     |       |   |      |
|-----------------------------------------------------------------------------------------------|---------------|---|------|------|-----|-------|---|------|
| <b>EDP828</b><br>1 rare                                                                       | DPB1* 828:01e | - | LFQG | DEFA | AAE | ILEEK | M | GGPM |
| <b>EDP972</b><br>1 rare                                                                       | DPB1* 972:01e | - | LFQG | GEFV | AAE | ILEEK | M | GGPM |
| <i>Both sides of this epitype require RARE alleles, review results to confirm assignment.</i> |               |   |      |      |     |       |   |      |

OR

| EPITYPE                                                                                       | ALLELES       | P GROUP | HVR-A | HVR-B | HVR-C | HVR-D | HVR-E | HVR-F |
|-----------------------------------------------------------------------------------------------|---------------|---------|-------|-------|-------|-------|-------|-------|
| <b>EDP642</b><br>1 rare                                                                       | DPB1* 642:01e | -       | LFQG  | EEFA  | DAE   | ILEEK | M     | GGPM  |
| <b>EDP828</b><br>1 rare                                                                       | DPB1* 828:01e | -       | LFQG  | DEFA  | AAE   | ILEEK | M     | GGPM  |
| <i>Both sides of this epitype require RARE alleles, review results to confirm assignment.</i> |               |         |       |       |       |       |       |       |

OR

| EPITYPE                                                                                       | ALLELES        | P GROUP | HVR-A | HVR-B | HVR-C | HVR-D | HVR-E | HVR-F |
|-----------------------------------------------------------------------------------------------|----------------|---------|-------|-------|-------|-------|-------|-------|
| <b>EDP828</b><br>1 rare                                                                       | DPB1* 828:01e  | -       | LFQG  | DEFA  | AAE   | ILEEK | M     | GGPM  |
| <b>EDP1081</b><br>1 rare                                                                      | DPB1* 1081:01e | -       | LFQG  | EEFA  | AAE   | VLEEK | M     | GGPM  |
| <i>Both sides of this epitype require RARE alleles, review results to confirm assignment.</i> |                |         |       |       |       |       |       |       |

OR

| EPITYPE                                                                                       | ALLELES         | P GROUP | HVR-A | HVR-B | HVR-C | HVR-D | HVR-E | HVR-F |
|-----------------------------------------------------------------------------------------------|-----------------|---------|-------|-------|-------|-------|-------|-------|
| <b>EDP828</b><br>1 rare                                                                       | DPB1* 828:01e   | -       | LFQG  | DEFA  | AAE   | ILEEK | M     | GGPM  |
| <b>EDP1135</b><br>1 rare                                                                      | DPB1* 1135:01Ne | -       | LFQG  | EEFA  | AAE   | ILGGE | D     | GRAH  |
| <i>Both sides of this epitype require RARE alleles, review results to confirm assignment.</i> |                 |         |       |       |       |       |       |       |

OR

| EPITYPE | ALLELES | P GROUP | HVR-A | HVR-B | HVR-C | HVR-D | HVR-E | HVR-F |
|---------|---------|---------|-------|-------|-------|-------|-------|-------|
|---------|---------|---------|-------|-------|-------|-------|-------|-------|

|                                                                                               |               |   |      |      |     |       |   |      |
|-----------------------------------------------------------------------------------------------|---------------|---|------|------|-----|-------|---|------|
| <b>EDP687</b><br>1 rare                                                                       | DPB1* 687:01e | - | LFQL | EEFA | AAE | ILEEK | M | GGPM |
| <b>EDP828</b><br>1 rare                                                                       | DPB1* 828:01e | - | LFQG | DEFA | AAE | ILEEK | M | GGPM |
| <i>Both sides of this epitope require RARE alleles, review results to confirm assignment.</i> |               |   |      |      |     |       |   |      |

OR

| EPITYPE                                                                                       | ALLELES       | P GROUP | HVR-A | HVR-B | HVR-C | HVR-D | HVR-E | HVR-F |
|-----------------------------------------------------------------------------------------------|---------------|---------|-------|-------|-------|-------|-------|-------|
| <b>EDP427</b><br>1 rare                                                                       | DPB1* 427:01e | -       | LFQG  | EEFA  | ATE   | ILEEK | M     | GGPM  |
| <b>EDP828</b><br>1 rare                                                                       | DPB1* 828:01e | -       | LFQG  | DEFA  | AAE   | ILEEK | M     | GGPM  |
| <i>Both sides of this epitope require RARE alleles, review results to confirm assignment.</i> |               |         |       |       |       |       |       |       |

OR

| EPITYPE                                                                                       | ALLELES        | P GROUP | HVR-A | HVR-B | HVR-C | HVR-D | HVR-E | HVR-F |
|-----------------------------------------------------------------------------------------------|----------------|---------|-------|-------|-------|-------|-------|-------|
| <b>EDP828</b><br>1 rare                                                                       | DPB1* 828:01e  | -       | LFQG  | DEFA  | AAE   | ILEEK | M     | GGPM  |
| <b>EDP867</b><br>1 rare                                                                       | DPB1* 867:01Ne | -       | LFQG  | EEFA  | CCG   | HPGGE | D     | GRAH  |
| <i>Both sides of this epitope require RARE alleles, review results to confirm assignment.</i> |                |         |       |       |       |       |       |       |

OR

| EPITYPE                                                                                       | ALLELES       | P GROUP | HVR-A | HVR-B | HVR-C | HVR-D | HVR-E | HVR-F |
|-----------------------------------------------------------------------------------------------|---------------|---------|-------|-------|-------|-------|-------|-------|
| <b>EDP177</b><br>1 rare                                                                       | DPB1* 177:01e | -       | LFQG  | EEFA  | AAE   | ILEEK | M     | SGPM  |
| <b>EDP828</b><br>1 rare                                                                       | DPB1* 828:01e | -       | LFQG  | DEFA  | AAE   | ILEEK | M     | GGPM  |
| <i>Both sides of this epitope require RARE alleles, review results to confirm assignment.</i> |               |         |       |       |       |       |       |       |

OR

| EPITYPE | ALLELES | P GROUP | HVR-A | HVR-B | HVR-C | HVR-D | HVR-E | HVR-F |
|---------|---------|---------|-------|-------|-------|-------|-------|-------|
|---------|---------|---------|-------|-------|-------|-------|-------|-------|

|                                                                                               |               |   |      |      |     |       |   |      |
|-----------------------------------------------------------------------------------------------|---------------|---|------|------|-----|-------|---|------|
| <b>EDP747</b><br>1 rare                                                                       | DPB1* 747:01e | - | VFQG | EEFA | AAE | ILEEK | M | GGPM |
| <b>EDP828</b><br>1 rare                                                                       | DPB1* 828:01e | - | LFQG | DEFA | AAE | ILEEK | M | GGPM |
| <i>Both sides of this epitope require RARE alleles, review results to confirm assignment.</i> |               |   |      |      |     |       |   |      |

OR

| EPITYPE                                                                                       | ALLELES        | P GROUP | HVR-A | HVR-B | HVR-C | HVR-D | HVR-E | HVR-F |
|-----------------------------------------------------------------------------------------------|----------------|---------|-------|-------|-------|-------|-------|-------|
| <b>EDP828</b><br>1 rare                                                                       | DPB1* 828:01e  | -       | LFQG  | DEFA  | AAE   | ILEEK | M     | GGPM  |
| <b>EDP1122</b><br>1 rare                                                                      | DPB1* 1122:01e | -       | LFQG  | EECA  | AAE   | ILEEK | M     | GGPM  |
| <i>Both sides of this epitope require RARE alleles, review results to confirm assignment.</i> |                |         |       |       |       |       |       |       |

OR

| EPITYPE                                                                                       | ALLELES       | P GROUP | HVR-A | HVR-B | HVR-C | HVR-D | HVR-E | HVR-F |
|-----------------------------------------------------------------------------------------------|---------------|---------|-------|-------|-------|-------|-------|-------|
| <b>EDP280</b><br>1 rare                                                                       | DPB1* 280:01e | -       | LFQG  | EEFA  | AAE   | ILEEK | M     | GAPM  |
| <b>EDP828</b><br>1 rare                                                                       | DPB1* 828:01e | -       | LFQG  | DEFA  | AAE   | ILEEK | M     | GGPM  |
| <i>Both sides of this epitope require RARE alleles, review results to confirm assignment.</i> |               |         |       |       |       |       |       |       |

OR

| EPITYPE                                                                                       | ALLELES       | P GROUP | HVR-A | HVR-B | HVR-C | HVR-D | HVR-E | HVR-F |
|-----------------------------------------------------------------------------------------------|---------------|---------|-------|-------|-------|-------|-------|-------|
| <b>EDP230</b><br>1 rare                                                                       | DPB1* 230:01e | -       | LFQG  | EEFA  | AAE   | ILEEK | M     | GWPM  |
| <b>EDP828</b><br>1 rare                                                                       | DPB1* 828:01e | -       | LFQG  | DEFA  | AAE   | ILEEK | M     | GGPM  |
| <i>Both sides of this epitope require RARE alleles, review results to confirm assignment.</i> |               |         |       |       |       |       |       |       |

OR

| EPITYPE | ALLELES | P GROUP | HVR-A | HVR-B | HVR-C | HVR-D | HVR-E | HVR-F |
|---------|---------|---------|-------|-------|-------|-------|-------|-------|
|---------|---------|---------|-------|-------|-------|-------|-------|-------|

|                                                                                               |                |   |      |      |     |       |   |      |
|-----------------------------------------------------------------------------------------------|----------------|---|------|------|-----|-------|---|------|
| <b>EDP570</b><br>1 rare                                                                       | DPB1* 911:01Ne | - | -    | -    | -   | -     | - | -    |
| <b>EDP828</b><br>1 rare                                                                       | DPB1* 828:01e  | - | LFQG | DEFA | AAE | ILEEK | M | GGPM |
| <i>Both sides of this epitype require RARE alleles, review results to confirm assignment.</i> |                |   |      |      |     |       |   |      |

OR

| EPITYPE                                                                                       | ALLELES       | P GROUP | HVR-A | HVR-B | HVR-C | HVR-D | HVR-E | HVR-F |
|-----------------------------------------------------------------------------------------------|---------------|---------|-------|-------|-------|-------|-------|-------|
| <b>EDP828</b><br>1 rare                                                                       | DPB1* 828:01e | -       | LFQG  | DEFA  | AAE   | ILEEK | M     | GGPM  |
| <b>EDP840</b><br>1 rare                                                                       | DPB1* 840:01e | -       | IFQG  | EEFA  | AAE   | ILEEK | M     | GGPM  |
| <i>Both sides of this epitype require RARE alleles, review results to confirm assignment.</i> |               |         |       |       |       |       |       |       |

OR

| EPITYPE                                                                                       | ALLELES       | P GROUP | HVR-A | HVR-B | HVR-C | HVR-D | HVR-E | HVR-F |
|-----------------------------------------------------------------------------------------------|---------------|---------|-------|-------|-------|-------|-------|-------|
| <b>EDP178</b><br>1 rare                                                                       | DPB1* 178:01e | -       | LFQG  | EEFA  | AAE   | ILEEK | M     | GGPV  |
| <b>EDP318</b><br>1 rare                                                                       | DPB1* 318:01e | -       | LFQG  | EEFT  | AAE   | ILEEK | M     | GGPM  |
| <i>Both sides of this epitype require RARE alleles, review results to confirm assignment.</i> |               |         |       |       |       |       |       |       |

OR

| EPITYPE                                                                                       | ALLELES       | P GROUP | HVR-A | HVR-B | HVR-C | HVR-D | HVR-E | HVR-F |
|-----------------------------------------------------------------------------------------------|---------------|---------|-------|-------|-------|-------|-------|-------|
| <b>EDP278</b><br>1 rare                                                                       | DPB1* 278:01e | -       | LFQG  | EEFA  | AAE   | ILEEK | I     | GGPM  |
| <b>EDP318</b><br>1 rare                                                                       | DPB1* 318:01e | -       | LFQG  | EEFT  | AAE   | ILEEK | M     | GGPM  |
| <i>Both sides of this epitype require RARE alleles, review results to confirm assignment.</i> |               |         |       |       |       |       |       |       |

OR

| EPITYPE | ALLELES | P GROUP | HVR-A | HVR-B | HVR-C | HVR-D | HVR-E | HVR-F |
|---------|---------|---------|-------|-------|-------|-------|-------|-------|
|---------|---------|---------|-------|-------|-------|-------|-------|-------|

|                                                                                               |                |   |      |      |     |       |   |      |
|-----------------------------------------------------------------------------------------------|----------------|---|------|------|-----|-------|---|------|
| <b>EDP318</b><br>1 rare                                                                       | DPB1* 318:01e  | - | LFQG | EEFT | AAE | ILEEK | M | GGPM |
| <b>EDP875</b><br>1 rare                                                                       | DPB1* 875:01Ne | - | FSRD | RSSR | -   | -     | - | -    |
| <i>Both sides of this epitope require RARE alleles, review results to confirm assignment.</i> |                |   |      |      |     |       |   |      |

OR

| EPITYPE                                                                                       | ALLELES       | P GROUP | HVR-A | HVR-B | HVR-C | HVR-D | HVR-E | HVR-F |
|-----------------------------------------------------------------------------------------------|---------------|---------|-------|-------|-------|-------|-------|-------|
| <b>EDP318</b><br>1 rare                                                                       | DPB1* 318:01e | -       | LFQG  | EEFT  | AAE   | ILEEK | M     | GGPM  |
| <b>EDP375</b><br>1 rare                                                                       | DPB1* 375:01e | -       | LFQG  | QEFA  | AAE   | ILEEK | M     | GGPM  |
| <i>Both sides of this epitope require RARE alleles, review results to confirm assignment.</i> |               |         |       |       |       |       |       |       |

OR

| EPITYPE                                                                                       | ALLELES       | P GROUP | HVR-A | HVR-B | HVR-C | HVR-D | HVR-E | HVR-F |
|-----------------------------------------------------------------------------------------------|---------------|---------|-------|-------|-------|-------|-------|-------|
| <b>EDP318</b><br>1 rare                                                                       | DPB1* 318:01e | -       | LFQG  | EEFT  | AAE   | ILEEK | M     | GGPM  |
| <b>EDP686</b><br>1 rare                                                                       | DPB1* 686:01e | -       | LFQG  | EGFA  | AAE   | ILEEK | M     | GGPM  |
| <i>Both sides of this epitope require RARE alleles, review results to confirm assignment.</i> |               |         |       |       |       |       |       |       |

OR

| EPITYPE                                                                                       | ALLELES       | P GROUP | HVR-A | HVR-B | HVR-C | HVR-D | HVR-E | HVR-F |
|-----------------------------------------------------------------------------------------------|---------------|---------|-------|-------|-------|-------|-------|-------|
| <b>EDP176</b><br>1 rare                                                                       | DPB1* 176:01e | -       | LFQG  | EEFA  | AAE   | ILKEK | M     | GGPM  |
| <b>EDP318</b><br>1 rare                                                                       | DPB1* 318:01e | -       | LFQG  | EEFT  | AAE   | ILEEK | M     | GGPM  |
| <i>Both sides of this epitope require RARE alleles, review results to confirm assignment.</i> |               |         |       |       |       |       |       |       |

OR

| EPITYPE | ALLELES | P GROUP | HVR-A | HVR-B | HVR-C | HVR-D | HVR-E | HVR-F |
|---------|---------|---------|-------|-------|-------|-------|-------|-------|
|---------|---------|---------|-------|-------|-------|-------|-------|-------|

|                                                                                               |               |   |      |      |     |       |   |      |
|-----------------------------------------------------------------------------------------------|---------------|---|------|------|-----|-------|---|------|
| <b>EDP318</b><br>1 rare                                                                       | DPB1* 318:01e | - | LFQG | EEFT | AAE | ILEEK | M | GGPM |
| <b>EDP456</b><br>1 rare                                                                       | DPB1* 456:01e | - | LFQG | EEFA | AAE | ILEVK | M | GGPM |
| <i>Both sides of this epitype require RARE alleles, review results to confirm assignment.</i> |               |   |      |      |     |       |   |      |

OR

| EPITYPE                                                                                       | ALLELES        | P GROUP | HVR-A | HVR-B | HVR-C | HVR-D | HVR-E | HVR-F |
|-----------------------------------------------------------------------------------------------|----------------|---------|-------|-------|-------|-------|-------|-------|
| <b>EDP318</b><br>1 rare                                                                       | DPB1* 318:01e  | -       | LFQG  | EEFT  | AAE   | ILEEK | M     | GGPM  |
| <b>EDP1097</b><br>1 rare                                                                      | DPB1* 1097:01e | -       | LFLG  | EEFA  | AAE   | ILEEK | M     | GGPM  |
| <i>Both sides of this epitype require RARE alleles, review results to confirm assignment.</i> |                |         |       |       |       |       |       |       |

OR

| EPITYPE                                                                                       | ALLELES       | P GROUP | HVR-A | HVR-B | HVR-C | HVR-D | HVR-E | HVR-F |
|-----------------------------------------------------------------------------------------------|---------------|---------|-------|-------|-------|-------|-------|-------|
| <b>EDP303</b><br>1 rare                                                                       | DPB1* 303:01e | -       | LFQG  | EEFA  | AAE   | ILEER | M     | GGPM  |
| <b>EDP318</b><br>1 rare                                                                       | DPB1* 318:01e | -       | LFQG  | EEFT  | AAE   | ILEEK | M     | GGPM  |
| <i>Both sides of this epitype require RARE alleles, review results to confirm assignment.</i> |               |         |       |       |       |       |       |       |

OR

| EPITYPE                                                                                       | ALLELES       | P GROUP | HVR-A | HVR-B | HVR-C | HVR-D | HVR-E | HVR-F |
|-----------------------------------------------------------------------------------------------|---------------|---------|-------|-------|-------|-------|-------|-------|
| <b>EDP318</b><br>1 rare                                                                       | DPB1* 318:01e | -       | LFQG  | EEFT  | AAE   | ILEEK | M     | GGPM  |
| <b>EDP753</b><br>1 rare                                                                       | DPB1* 753:01e | -       | FFQG  | EEFA  | AAE   | ILEEK | M     | GGPM  |
| <i>Both sides of this epitype require RARE alleles, review results to confirm assignment.</i> |               |         |       |       |       |       |       |       |

OR

| EPITYPE | ALLELES | P GROUP | HVR-A | HVR-B | HVR-C | HVR-D | HVR-E | HVR-F |
|---------|---------|---------|-------|-------|-------|-------|-------|-------|
|---------|---------|---------|-------|-------|-------|-------|-------|-------|

|                                                                                               |                |   |      |      |     |       |   |      |
|-----------------------------------------------------------------------------------------------|----------------|---|------|------|-----|-------|---|------|
| <b>EDP318</b><br>1 rare                                                                       | DPB1* 318:01e  | - | LFQG | EEFT | AAE | ILEEK | M | GGPM |
| <b>EDP934</b><br>1 rare                                                                       | DPB1* 934:01Qe | - | LFQG | EFA  | AAE | ILEEK | M | GGPM |
| <i>Both sides of this epitope require RARE alleles, review results to confirm assignment.</i> |                |   |      |      |     |       |   |      |

OR

| EPITYPE                                                                                       | ALLELES        | P GROUP | HVR-A | HVR-B | HVR-C | HVR-D | HVR-E | HVR-F |
|-----------------------------------------------------------------------------------------------|----------------|---------|-------|-------|-------|-------|-------|-------|
| <b>EDP318</b><br>1 rare                                                                       | DPB1* 318:01e  | -       | LFQG  | EEFT  | AAE   | ILEEK | M     | GGPM  |
| <b>EDP874</b><br>1 rare                                                                       | DPB1* 874:01Ne | -       | LFQG  | EEFA  | AAE   | ILEEK | C     | -     |
| <i>Both sides of this epitope require RARE alleles, review results to confirm assignment.</i> |                |         |       |       |       |       |       |       |

OR

| EPITYPE                                                                                       | ALLELES       | P GROUP | HVR-A | HVR-B | HVR-C | HVR-D | HVR-E | HVR-F |
|-----------------------------------------------------------------------------------------------|---------------|---------|-------|-------|-------|-------|-------|-------|
| <b>EDP254</b><br>1 rare                                                                       | DPB1* 254:01e | -       | LFQG  | EEFA  | AVE   | ILEEK | M     | GGPM  |
| <b>EDP318</b><br>1 rare                                                                       | DPB1* 318:01e | -       | LFQG  | EEFT  | AAE   | ILEEK | M     | GGPM  |
| <i>Both sides of this epitope require RARE alleles, review results to confirm assignment.</i> |               |         |       |       |       |       |       |       |

OR

| EPITYPE                                                                                       | ALLELES       | P GROUP | HVR-A | HVR-B | HVR-C | HVR-D | HVR-E | HVR-F |
|-----------------------------------------------------------------------------------------------|---------------|---------|-------|-------|-------|-------|-------|-------|
| <b>EDP318</b><br>1 rare                                                                       | DPB1* 318:01e | -       | LFQG  | EEFT  | AAE   | ILEEK | M     | GGPM  |
| <b>EDP454</b><br>1 rare                                                                       | DPB1* 454:01e | -       | LFQG  | EEFA  | AAE   | ILEEK | M     | GEPM  |
| <i>Both sides of this epitope require RARE alleles, review results to confirm assignment.</i> |               |         |       |       |       |       |       |       |

OR

| EPITYPE | ALLELES | P GROUP | HVR-A | HVR-B | HVR-C | HVR-D | HVR-E | HVR-F |
|---------|---------|---------|-------|-------|-------|-------|-------|-------|
|---------|---------|---------|-------|-------|-------|-------|-------|-------|

|                                                                                               |                |   |      |      |     |       |   |      |
|-----------------------------------------------------------------------------------------------|----------------|---|------|------|-----|-------|---|------|
| <b>EDP318</b><br>1 rare                                                                       | DPB1* 318:01e  | - | LFQG | EEFT | AAE | ILEEK | M | GGPM |
| <b>EDP1046</b><br>1 rare                                                                      | DPB1* 1046:01e | - | LFQG | EEIA | AAE | ILEEK | M | GGPM |
| <i>Both sides of this epitype require RARE alleles, review results to confirm assignment.</i> |                |   |      |      |     |       |   |      |

OR

| EPITYPE                                                                                       | ALLELES       | P GROUP | HVR-A | HVR-B | HVR-C | HVR-D | HVR-E | HVR-F |
|-----------------------------------------------------------------------------------------------|---------------|---------|-------|-------|-------|-------|-------|-------|
| <b>EDP318</b><br>1 rare                                                                       | DPB1* 318:01e | -       | LFQG  | EEFT  | AAE   | ILEEK | M     | GGPM  |
| <b>EDP921</b><br>1 rare                                                                       | DPB1* 921:01e | -       | LFQG  | GEFA  | AAE   | ILEEK | M     | GGPM  |
| <i>Both sides of this epitype require RARE alleles, review results to confirm assignment.</i> |               |         |       |       |       |       |       |       |

OR

| EPITYPE                                                                                       | ALLELES        | P GROUP | HVR-A | HVR-B | HVR-C | HVR-D | HVR-E | HVR-F |
|-----------------------------------------------------------------------------------------------|----------------|---------|-------|-------|-------|-------|-------|-------|
| <b>EDP318</b><br>1 rare                                                                       | DPB1* 318:01e  | -       | LFQG  | EEFT  | AAE   | ILEEK | M     | GGPM  |
| <b>EDP871</b><br>1 rare                                                                       | DPB1* 871:01Ne | -       | LFQG  | EEFA  | AAE   | HPGGE | D     | GRAH  |
| <i>Both sides of this epitype require RARE alleles, review results to confirm assignment.</i> |                |         |       |       |       |       |       |       |

OR

| EPITYPE                                                                                       | ALLELES       | P GROUP | HVR-A | HVR-B | HVR-C | HVR-D | HVR-E | HVR-F |
|-----------------------------------------------------------------------------------------------|---------------|---------|-------|-------|-------|-------|-------|-------|
| <b>EDP318</b><br>1 rare                                                                       | DPB1* 318:01e | -       | LFQG  | EEFT  | AAE   | ILEEK | M     | GGPM  |
| <b>EDP399</b><br>1 rare                                                                       | DPB1* 399:01e | -       | LFQG  | EEFA  | AAE   | IVEEK | M     | GGPM  |
| <i>Both sides of this epitype require RARE alleles, review results to confirm assignment.</i> |               |         |       |       |       |       |       |       |

OR

| EPITYPE | ALLELES | P GROUP | HVR-A | HVR-B | HVR-C | HVR-D | HVR-E | HVR-F |
|---------|---------|---------|-------|-------|-------|-------|-------|-------|
|---------|---------|---------|-------|-------|-------|-------|-------|-------|



|                                                                                               |               |   |      |      |     |       |   |      |
|-----------------------------------------------------------------------------------------------|---------------|---|------|------|-----|-------|---|------|
| <b>EDP318</b><br>1 rare                                                                       | DPB1* 318:01e | - | LFQG | EEFT | AAE | ILEEK | M | GGPM |
| <b>EDP319</b><br>1 rare                                                                       | DPB1* 319:01e | - | LFQG | EEFA | AAE | IQEEK | M | GGPM |
| <i>Both sides of this epitype require RARE alleles, review results to confirm assignment.</i> |               |   |      |      |     |       |   |      |

OR

| EPITYPE                                                                                       | ALLELES       | P GROUP | HVR-A | HVR-B | HVR-C | HVR-D | HVR-E | HVR-F |
|-----------------------------------------------------------------------------------------------|---------------|---------|-------|-------|-------|-------|-------|-------|
| <b>EDP179</b><br>1 rare                                                                       | DPB1* 179:01e | -       | LFQG  | EEFA  | AAE   | LLEER | M     | GGPM  |
| <b>EDP318</b><br>1 rare                                                                       | DPB1* 318:01e | -       | LFQG  | EEFT  | AAE   | ILEEK | M     | GGPM  |
| <i>Both sides of this epitype require RARE alleles, review results to confirm assignment.</i> |               |         |       |       |       |       |       |       |

OR

| EPITYPE                                                                                       | ALLELES       | P GROUP | HVR-A | HVR-B | HVR-C | HVR-D | HVR-E | HVR-F |
|-----------------------------------------------------------------------------------------------|---------------|---------|-------|-------|-------|-------|-------|-------|
| <b>EDP318</b><br>1 rare                                                                       | DPB1* 318:01e | -       | LFQG  | EEFT  | AAE   | ILEEK | M     | GGPM  |
| <b>EDP679</b><br>1 rare                                                                       | DPB1* 679:01e | -       | PFQG  | EEFA  | AAE   | ILEEK | M     | GGPM  |
| <i>Both sides of this epitype require RARE alleles, review results to confirm assignment.</i> |               |         |       |       |       |       |       |       |

OR

| EPITYPE                                                                                       | ALLELES       | P GROUP | HVR-A | HVR-B | HVR-C | HVR-D | HVR-E | HVR-F |
|-----------------------------------------------------------------------------------------------|---------------|---------|-------|-------|-------|-------|-------|-------|
| <b>EDP318</b><br>1 rare                                                                       | DPB1* 318:01e | -       | LFQG  | EEFT  | AAE   | ILEEK | M     | GGPM  |
| <b>EDP592</b><br>1 rare                                                                       | DPB1* 592:01e | -       | LFQG  | EEFA  | AAE   | ILEEK | M     | GGPR  |
| <i>Both sides of this epitype require RARE alleles, review results to confirm assignment.</i> |               |         |       |       |       |       |       |       |

OR

| EPITYPE | ALLELES | P GROUP | HVR-A | HVR-B | HVR-C | HVR-D | HVR-E | HVR-F |
|---------|---------|---------|-------|-------|-------|-------|-------|-------|
|---------|---------|---------|-------|-------|-------|-------|-------|-------|

|                                                                                               |               |   |      |      |     |       |   |      |
|-----------------------------------------------------------------------------------------------|---------------|---|------|------|-----|-------|---|------|
| <b>EDP318</b><br>1 rare                                                                       | DPB1* 318:01e | - | LFQG | EEFT | AAE | ILEEK | M | GGPM |
| <b>EDP972</b><br>1 rare                                                                       | DPB1* 972:01e | - | LFQG | GEFV | AAE | ILEEK | M | GGPM |
| <i>Both sides of this epitope require RARE alleles, review results to confirm assignment.</i> |               |   |      |      |     |       |   |      |

OR

| EPITYPE                                                                                       | ALLELES       | P GROUP | HVR-A | HVR-B | HVR-C | HVR-D | HVR-E | HVR-F |
|-----------------------------------------------------------------------------------------------|---------------|---------|-------|-------|-------|-------|-------|-------|
| <b>EDP318</b><br>1 rare                                                                       | DPB1* 318:01e | -       | LFQG  | EEFT  | AAE   | ILEEK | M     | GGPM  |
| <b>EDP642</b><br>1 rare                                                                       | DPB1* 642:01e | -       | LFQG  | EEFA  | DAE   | ILEEK | M     | GGPM  |
| <i>Both sides of this epitope require RARE alleles, review results to confirm assignment.</i> |               |         |       |       |       |       |       |       |

OR

| EPITYPE                                                                                       | ALLELES        | P GROUP | HVR-A | HVR-B | HVR-C | HVR-D | HVR-E | HVR-F |
|-----------------------------------------------------------------------------------------------|----------------|---------|-------|-------|-------|-------|-------|-------|
| <b>EDP318</b><br>1 rare                                                                       | DPB1* 318:01e  | -       | LFQG  | EEFT  | AAE   | ILEEK | M     | GGPM  |
| <b>EDP1081</b><br>1 rare                                                                      | DPB1* 1081:01e | -       | LFQG  | EEFA  | AAE   | VLEEK | M     | GGPM  |
| <i>Both sides of this epitope require RARE alleles, review results to confirm assignment.</i> |                |         |       |       |       |       |       |       |

OR

| EPITYPE                                                                                       | ALLELES         | P GROUP | HVR-A | HVR-B | HVR-C | HVR-D | HVR-E | HVR-F |
|-----------------------------------------------------------------------------------------------|-----------------|---------|-------|-------|-------|-------|-------|-------|
| <b>EDP318</b><br>1 rare                                                                       | DPB1* 318:01e   | -       | LFQG  | EEFT  | AAE   | ILEEK | M     | GGPM  |
| <b>EDP1135</b><br>1 rare                                                                      | DPB1* 1135:01Ne | -       | LFQG  | EEFA  | AAE   | ILGGE | D     | GRAH  |
| <i>Both sides of this epitope require RARE alleles, review results to confirm assignment.</i> |                 |         |       |       |       |       |       |       |

OR

| EPITYPE | ALLELES | P GROUP | HVR-A | HVR-B | HVR-C | HVR-D | HVR-E | HVR-F |
|---------|---------|---------|-------|-------|-------|-------|-------|-------|
|---------|---------|---------|-------|-------|-------|-------|-------|-------|

|                                                                                               |               |   |      |      |     |       |   |      |
|-----------------------------------------------------------------------------------------------|---------------|---|------|------|-----|-------|---|------|
| <b>EDP318</b><br>1 rare                                                                       | DPB1* 318:01e | - | LFQG | EEFT | AAE | ILEEK | M | GGPM |
| <b>EDP687</b><br>1 rare                                                                       | DPB1* 687:01e | - | LFQL | EEFA | AAE | ILEEK | M | GGPM |
| <i>Both sides of this epitype require RARE alleles, review results to confirm assignment.</i> |               |   |      |      |     |       |   |      |

OR

| EPITYPE                                                                                       | ALLELES       | P GROUP | HVR-A | HVR-B | HVR-C | HVR-D | HVR-E | HVR-F |
|-----------------------------------------------------------------------------------------------|---------------|---------|-------|-------|-------|-------|-------|-------|
| <b>EDP318</b><br>1 rare                                                                       | DPB1* 318:01e | -       | LFQG  | EEFT  | AAE   | ILEEK | M     | GGPM  |
| <b>EDP427</b><br>1 rare                                                                       | DPB1* 427:01e | -       | LFQG  | EEFA  | ATE   | ILEEK | M     | GGPM  |
| <i>Both sides of this epitype require RARE alleles, review results to confirm assignment.</i> |               |         |       |       |       |       |       |       |

OR

| EPITYPE                                                                                       | ALLELES        | P GROUP | HVR-A | HVR-B | HVR-C | HVR-D | HVR-E | HVR-F |
|-----------------------------------------------------------------------------------------------|----------------|---------|-------|-------|-------|-------|-------|-------|
| <b>EDP318</b><br>1 rare                                                                       | DPB1* 318:01e  | -       | LFQG  | EEFT  | AAE   | ILEEK | M     | GGPM  |
| <b>EDP867</b><br>1 rare                                                                       | DPB1* 867:01Ne | -       | LFQG  | EEFA  | CCG   | HPGGE | D     | GRAH  |
| <i>Both sides of this epitype require RARE alleles, review results to confirm assignment.</i> |                |         |       |       |       |       |       |       |

OR

| EPITYPE                                                                                       | ALLELES       | P GROUP | HVR-A | HVR-B | HVR-C | HVR-D | HVR-E | HVR-F |
|-----------------------------------------------------------------------------------------------|---------------|---------|-------|-------|-------|-------|-------|-------|
| <b>EDP177</b><br>1 rare                                                                       | DPB1* 177:01e | -       | LFQG  | EEFA  | AAE   | ILEEK | M     | SGPM  |
| <b>EDP318</b><br>1 rare                                                                       | DPB1* 318:01e | -       | LFQG  | EEFT  | AAE   | ILEEK | M     | GGPM  |
| <i>Both sides of this epitype require RARE alleles, review results to confirm assignment.</i> |               |         |       |       |       |       |       |       |

OR

| EPITYPE | ALLELES | P GROUP | HVR-A | HVR-B | HVR-C | HVR-D | HVR-E | HVR-F |
|---------|---------|---------|-------|-------|-------|-------|-------|-------|
|---------|---------|---------|-------|-------|-------|-------|-------|-------|

|                                                                                               |               |   |      |      |     |       |   |      |
|-----------------------------------------------------------------------------------------------|---------------|---|------|------|-----|-------|---|------|
| <b>EDP318</b><br>1 rare                                                                       | DPB1* 318:01e | - | LFQG | EEFT | AAE | ILEEK | M | GGPM |
| <b>EDP747</b><br>1 rare                                                                       | DPB1* 747:01e | - | VFQG | EEFA | AAE | ILEEK | M | GGPM |
| <i>Both sides of this epitype require RARE alleles, review results to confirm assignment.</i> |               |   |      |      |     |       |   |      |

OR

| EPITYPE                                                                                       | ALLELES        | P GROUP | HVR-A | HVR-B | HVR-C | HVR-D | HVR-E | HVR-F |
|-----------------------------------------------------------------------------------------------|----------------|---------|-------|-------|-------|-------|-------|-------|
| <b>EDP318</b><br>1 rare                                                                       | DPB1* 318:01e  | -       | LFQG  | EEFT  | AAE   | ILEEK | M     | GGPM  |
| <b>EDP1122</b><br>1 rare                                                                      | DPB1* 1122:01e | -       | LFQG  | EECA  | AAE   | ILEEK | M     | GGPM  |
| <i>Both sides of this epitype require RARE alleles, review results to confirm assignment.</i> |                |         |       |       |       |       |       |       |

OR

| EPITYPE                                                                                       | ALLELES       | P GROUP | HVR-A | HVR-B | HVR-C | HVR-D | HVR-E | HVR-F |
|-----------------------------------------------------------------------------------------------|---------------|---------|-------|-------|-------|-------|-------|-------|
| <b>EDP280</b><br>1 rare                                                                       | DPB1* 280:01e | -       | LFQG  | EEFA  | AAE   | ILEEK | M     | GAPM  |
| <b>EDP318</b><br>1 rare                                                                       | DPB1* 318:01e | -       | LFQG  | EEFT  | AAE   | ILEEK | M     | GGPM  |
| <i>Both sides of this epitype require RARE alleles, review results to confirm assignment.</i> |               |         |       |       |       |       |       |       |

OR

| EPITYPE                                                                                       | ALLELES       | P GROUP | HVR-A | HVR-B | HVR-C | HVR-D | HVR-E | HVR-F |
|-----------------------------------------------------------------------------------------------|---------------|---------|-------|-------|-------|-------|-------|-------|
| <b>EDP230</b><br>1 rare                                                                       | DPB1* 230:01e | -       | LFQG  | EEFA  | AAE   | ILEEK | M     | GWPM  |
| <b>EDP318</b><br>1 rare                                                                       | DPB1* 318:01e | -       | LFQG  | EEFT  | AAE   | ILEEK | M     | GGPM  |
| <i>Both sides of this epitype require RARE alleles, review results to confirm assignment.</i> |               |         |       |       |       |       |       |       |

OR

| EPITYPE | ALLELES | P GROUP | HVR-A | HVR-B | HVR-C | HVR-D | HVR-E | HVR-F |
|---------|---------|---------|-------|-------|-------|-------|-------|-------|
|---------|---------|---------|-------|-------|-------|-------|-------|-------|

|                                                                                               |                |   |      |      |     |       |   |      |
|-----------------------------------------------------------------------------------------------|----------------|---|------|------|-----|-------|---|------|
| <b>EDP318</b><br>1 rare                                                                       | DPB1* 318:01e  | - | LFQG | EEFT | AAE | ILEEK | M | GGPM |
| <b>EDP570</b><br>1 rare                                                                       | DPB1* 911:01Ne | - | -    | -    | -   | -     | - | -    |
| <i>Both sides of this epitype require RARE alleles, review results to confirm assignment.</i> |                |   |      |      |     |       |   |      |

OR

| EPITYPE                                                                                       | ALLELES       | P GROUP | HVR-A | HVR-B | HVR-C | HVR-D | HVR-E | HVR-F |
|-----------------------------------------------------------------------------------------------|---------------|---------|-------|-------|-------|-------|-------|-------|
| <b>EDP318</b><br>1 rare                                                                       | DPB1* 318:01e | -       | LFQG  | EEFT  | AAE   | ILEEK | M     | GGPM  |
| <b>EDP840</b><br>1 rare                                                                       | DPB1* 840:01e | -       | IFQG  | EEFA  | AAE   | ILEEK | M     | GGPM  |
| <i>Both sides of this epitype require RARE alleles, review results to confirm assignment.</i> |               |         |       |       |       |       |       |       |

OR

| EPITYPE                                                                                       | ALLELES       | P GROUP | HVR-A | HVR-B | HVR-C | HVR-D | HVR-E | HVR-F |
|-----------------------------------------------------------------------------------------------|---------------|---------|-------|-------|-------|-------|-------|-------|
| <b>EDP178</b><br>1 rare                                                                       | DPB1* 178:01e | -       | LFQG  | EEFA  | AAE   | ILEEK | M     | GGPV  |
| <b>EDP278</b><br>1 rare                                                                       | DPB1* 278:01e | -       | LFQG  | EEFA  | AAE   | ILEEK | I     | GGPM  |
| <i>Both sides of this epitype require RARE alleles, review results to confirm assignment.</i> |               |         |       |       |       |       |       |       |

OR

| EPITYPE                                                                                       | ALLELES        | P GROUP | HVR-A | HVR-B | HVR-C | HVR-D | HVR-E | HVR-F |
|-----------------------------------------------------------------------------------------------|----------------|---------|-------|-------|-------|-------|-------|-------|
| <b>EDP178</b><br>1 rare                                                                       | DPB1* 178:01e  | -       | LFQG  | EEFA  | AAE   | ILEEK | M     | GGPV  |
| <b>EDP875</b><br>1 rare                                                                       | DPB1* 875:01Ne | -       | FSRD  | RSSR  | -     | -     | -     | -     |
| <i>Both sides of this epitype require RARE alleles, review results to confirm assignment.</i> |                |         |       |       |       |       |       |       |

OR

| EPITYPE | ALLELES | P GROUP | HVR-A | HVR-B | HVR-C | HVR-D | HVR-E | HVR-F |
|---------|---------|---------|-------|-------|-------|-------|-------|-------|
|---------|---------|---------|-------|-------|-------|-------|-------|-------|

|                                                                                               |               |   |      |      |     |       |   |      |
|-----------------------------------------------------------------------------------------------|---------------|---|------|------|-----|-------|---|------|
| <b>EDP178</b><br>1 rare                                                                       | DPB1* 178:01e | - | LFQG | EEFA | AAE | ILEEK | M | GGPV |
| <b>EDP375</b><br>1 rare                                                                       | DPB1* 375:01e | - | LFQG | QEFA | AAE | ILEEK | M | GGPM |
| <i>Both sides of this epitype require RARE alleles, review results to confirm assignment.</i> |               |   |      |      |     |       |   |      |

OR

| EPITYPE                                                                                       | ALLELES       | P GROUP | HVR-A | HVR-B | HVR-C | HVR-D | HVR-E | HVR-F |
|-----------------------------------------------------------------------------------------------|---------------|---------|-------|-------|-------|-------|-------|-------|
| <b>EDP178</b><br>1 rare                                                                       | DPB1* 178:01e | -       | LFQG  | EEFA  | AAE   | ILEEK | M     | GGPV  |
| <b>EDP686</b><br>1 rare                                                                       | DPB1* 686:01e | -       | LFQG  | EGFA  | AAE   | ILEEK | M     | GGPM  |
| <i>Both sides of this epitype require RARE alleles, review results to confirm assignment.</i> |               |         |       |       |       |       |       |       |

OR

| EPITYPE                                                                                       | ALLELES       | P GROUP | HVR-A | HVR-B | HVR-C | HVR-D | HVR-E | HVR-F |
|-----------------------------------------------------------------------------------------------|---------------|---------|-------|-------|-------|-------|-------|-------|
| <b>EDP176</b><br>1 rare                                                                       | DPB1* 176:01e | -       | LFQG  | EEFA  | AAE   | ILKEK | M     | GGPM  |
| <b>EDP178</b><br>1 rare                                                                       | DPB1* 178:01e | -       | LFQG  | EEFA  | AAE   | ILEEK | M     | GGPV  |
| <i>Both sides of this epitype require RARE alleles, review results to confirm assignment.</i> |               |         |       |       |       |       |       |       |

OR

| EPITYPE                                                                                       | ALLELES       | P GROUP | HVR-A | HVR-B | HVR-C | HVR-D | HVR-E | HVR-F |
|-----------------------------------------------------------------------------------------------|---------------|---------|-------|-------|-------|-------|-------|-------|
| <b>EDP178</b><br>1 rare                                                                       | DPB1* 178:01e | -       | LFQG  | EEFA  | AAE   | ILEEK | M     | GGPV  |
| <b>EDP456</b><br>1 rare                                                                       | DPB1* 456:01e | -       | LFQG  | EEFA  | AAE   | ILEVK | M     | GGPM  |
| <i>Both sides of this epitype require RARE alleles, review results to confirm assignment.</i> |               |         |       |       |       |       |       |       |

OR

| EPITYPE | ALLELES | P GROUP | HVR-A | HVR-B | HVR-C | HVR-D | HVR-E | HVR-F |
|---------|---------|---------|-------|-------|-------|-------|-------|-------|
|---------|---------|---------|-------|-------|-------|-------|-------|-------|

|                                                                                               |                |   |      |      |     |       |   |      |
|-----------------------------------------------------------------------------------------------|----------------|---|------|------|-----|-------|---|------|
| <b>EDP178</b><br>1 rare                                                                       | DPB1* 178:01e  | - | LFQG | EEFA | AAE | ILEEK | M | GGPV |
| <b>EDP1097</b><br>1 rare                                                                      | DPB1* 1097:01e | - | LFLG | EEFA | AAE | ILEEK | M | GGPM |
| <i>Both sides of this epitype require RARE alleles, review results to confirm assignment.</i> |                |   |      |      |     |       |   |      |

OR

| EPITYPE                                                                                       | ALLELES       | P GROUP | HVR-A | HVR-B | HVR-C | HVR-D | HVR-E | HVR-F |
|-----------------------------------------------------------------------------------------------|---------------|---------|-------|-------|-------|-------|-------|-------|
| <b>EDP178</b><br>1 rare                                                                       | DPB1* 178:01e | -       | LFQG  | EEFA  | AAE   | ILEEK | M     | GGPV  |
| <b>EDP303</b><br>1 rare                                                                       | DPB1* 303:01e | -       | LFQG  | EEFA  | AAE   | ILEER | M     | GGPM  |
| <i>Both sides of this epitype require RARE alleles, review results to confirm assignment.</i> |               |         |       |       |       |       |       |       |

OR

| EPITYPE                                                                                       | ALLELES       | P GROUP | HVR-A | HVR-B | HVR-C | HVR-D | HVR-E | HVR-F |
|-----------------------------------------------------------------------------------------------|---------------|---------|-------|-------|-------|-------|-------|-------|
| <b>EDP178</b><br>1 rare                                                                       | DPB1* 178:01e | -       | LFQG  | EEFA  | AAE   | ILEEK | M     | GGPV  |
| <b>EDP753</b><br>1 rare                                                                       | DPB1* 753:01e | -       | FFQG  | EEFA  | AAE   | ILEEK | M     | GGPM  |
| <i>Both sides of this epitype require RARE alleles, review results to confirm assignment.</i> |               |         |       |       |       |       |       |       |

OR

| EPITYPE                                                                                       | ALLELES        | P GROUP | HVR-A | HVR-B | HVR-C | HVR-D | HVR-E | HVR-F |
|-----------------------------------------------------------------------------------------------|----------------|---------|-------|-------|-------|-------|-------|-------|
| <b>EDP178</b><br>1 rare                                                                       | DPB1* 178:01e  | -       | LFQG  | EEFA  | AAE   | ILEEK | M     | GGPV  |
| <b>EDP934</b><br>1 rare                                                                       | DPB1* 934:01Qe | -       | LFQG  | EFA   | AAE   | ILEEK | M     | GGPM  |
| <i>Both sides of this epitype require RARE alleles, review results to confirm assignment.</i> |                |         |       |       |       |       |       |       |

OR

| EPITYPE | ALLELES | P GROUP | HVR-A | HVR-B | HVR-C | HVR-D | HVR-E | HVR-F |
|---------|---------|---------|-------|-------|-------|-------|-------|-------|
|---------|---------|---------|-------|-------|-------|-------|-------|-------|

|                                                                                               |                |   |      |      |     |       |   |      |
|-----------------------------------------------------------------------------------------------|----------------|---|------|------|-----|-------|---|------|
| <b>EDP178</b><br>1 rare                                                                       | DPB1* 178:01e  | - | LFQG | EEFA | AAE | ILEEK | M | GGPV |
| <b>EDP874</b><br>1 rare                                                                       | DPB1* 874:01Ne | - | LFQG | EEFA | AAE | ILEEK | C | -    |
| <i>Both sides of this epitope require RARE alleles, review results to confirm assignment.</i> |                |   |      |      |     |       |   |      |

OR

| EPITYPE                                                                                       | ALLELES       | P GROUP | HVR-A | HVR-B | HVR-C | HVR-D | HVR-E | HVR-F |
|-----------------------------------------------------------------------------------------------|---------------|---------|-------|-------|-------|-------|-------|-------|
| <b>EDP178</b><br>1 rare                                                                       | DPB1* 178:01e | -       | LFQG  | EEFA  | AAE   | ILEEK | M     | GGPV  |
| <b>EDP254</b><br>1 rare                                                                       | DPB1* 254:01e | -       | LFQG  | EEFA  | AVE   | ILEEK | M     | GGPM  |
| <i>Both sides of this epitope require RARE alleles, review results to confirm assignment.</i> |               |         |       |       |       |       |       |       |

OR

| EPITYPE                                                                                       | ALLELES       | P GROUP | HVR-A | HVR-B | HVR-C | HVR-D | HVR-E | HVR-F |
|-----------------------------------------------------------------------------------------------|---------------|---------|-------|-------|-------|-------|-------|-------|
| <b>EDP178</b><br>1 rare                                                                       | DPB1* 178:01e | -       | LFQG  | EEFA  | AAE   | ILEEK | M     | GGPV  |
| <b>EDP454</b><br>1 rare                                                                       | DPB1* 454:01e | -       | LFQG  | EEFA  | AAE   | ILEEK | M     | GEPM  |
| <i>Both sides of this epitope require RARE alleles, review results to confirm assignment.</i> |               |         |       |       |       |       |       |       |

OR

| EPITYPE                                                                                       | ALLELES        | P GROUP | HVR-A | HVR-B | HVR-C | HVR-D | HVR-E | HVR-F |
|-----------------------------------------------------------------------------------------------|----------------|---------|-------|-------|-------|-------|-------|-------|
| <b>EDP178</b><br>1 rare                                                                       | DPB1* 178:01e  | -       | LFQG  | EEFA  | AAE   | ILEEK | M     | GGPV  |
| <b>EDP1046</b><br>1 rare                                                                      | DPB1* 1046:01e | -       | LFQG  | EEIA  | AAE   | ILEEK | M     | GGPM  |
| <i>Both sides of this epitope require RARE alleles, review results to confirm assignment.</i> |                |         |       |       |       |       |       |       |

OR

| EPITYPE | ALLELES | P GROUP | HVR-A | HVR-B | HVR-C | HVR-D | HVR-E | HVR-F |
|---------|---------|---------|-------|-------|-------|-------|-------|-------|
|---------|---------|---------|-------|-------|-------|-------|-------|-------|



|                                                                                               |               |   |      |      |     |       |   |      |
|-----------------------------------------------------------------------------------------------|---------------|---|------|------|-----|-------|---|------|
| <b>EDP178</b><br>1 rare                                                                       | DPB1* 178:01e | - | LFQG | EEFA | AAE | ILEEK | M | GGPV |
| <b>EDP921</b><br>1 rare                                                                       | DPB1* 921:01e | - | LFQG | GEFA | AAE | ILEEK | M | GGPM |
| <i>Both sides of this epitype require RARE alleles, review results to confirm assignment.</i> |               |   |      |      |     |       |   |      |

OR

| EPITYPE                                                                                       | ALLELES        | P GROUP | HVR-A | HVR-B | HVR-C | HVR-D | HVR-E | HVR-F |
|-----------------------------------------------------------------------------------------------|----------------|---------|-------|-------|-------|-------|-------|-------|
| <b>EDP178</b><br>1 rare                                                                       | DPB1* 178:01e  | -       | LFQG  | EEFA  | AAE   | ILEEK | M     | GGPV  |
| <b>EDP871</b><br>1 rare                                                                       | DPB1* 871:01Ne | -       | LFQG  | EEFA  | AAE   | HPGGE | D     | GRAH  |
| <i>Both sides of this epitype require RARE alleles, review results to confirm assignment.</i> |                |         |       |       |       |       |       |       |

OR

| EPITYPE                                                                                       | ALLELES       | P GROUP | HVR-A | HVR-B | HVR-C | HVR-D | HVR-E | HVR-F |
|-----------------------------------------------------------------------------------------------|---------------|---------|-------|-------|-------|-------|-------|-------|
| <b>EDP178</b><br>1 rare                                                                       | DPB1* 178:01e | -       | LFQG  | EEFA  | AAE   | ILEEK | M     | GGPV  |
| <b>EDP399</b><br>1 rare                                                                       | DPB1* 399:01e | -       | LFQG  | EEFA  | AAE   | IVEEK | M     | GGPM  |
| <i>Both sides of this epitype require RARE alleles, review results to confirm assignment.</i> |               |         |       |       |       |       |       |       |

OR

| EPITYPE                                                                                       | ALLELES       | P GROUP | HVR-A | HVR-B | HVR-C | HVR-D | HVR-E | HVR-F |
|-----------------------------------------------------------------------------------------------|---------------|---------|-------|-------|-------|-------|-------|-------|
| <b>EDP178</b><br>1 rare                                                                       | DPB1* 178:01e | -       | LFQG  | EEFA  | AAE   | ILEEK | M     | GGPV  |
| <b>EDP319</b><br>1 rare                                                                       | DPB1* 319:01e | -       | LFQG  | EEFA  | AAE   | IQEEK | M     | GGPM  |
| <i>Both sides of this epitype require RARE alleles, review results to confirm assignment.</i> |               |         |       |       |       |       |       |       |

OR

| EPITYPE | ALLELES | P GROUP | HVR-A | HVR-B | HVR-C | HVR-D | HVR-E | HVR-F |
|---------|---------|---------|-------|-------|-------|-------|-------|-------|
|---------|---------|---------|-------|-------|-------|-------|-------|-------|

|                                                                                               |               |   |      |      |     |       |   |      |
|-----------------------------------------------------------------------------------------------|---------------|---|------|------|-----|-------|---|------|
| <b>EDP178</b><br>1 rare                                                                       | DPB1* 178:01e | - | LFQG | EEFA | AAE | ILEEK | M | GGPV |
| <b>EDP179</b><br>1 rare                                                                       | DPB1* 179:01e | - | LFQG | EEFA | AAE | LLEER | M | GGPM |
| <i>Both sides of this epitype require RARE alleles, review results to confirm assignment.</i> |               |   |      |      |     |       |   |      |

OR

| EPITYPE                                                                                       | ALLELES       | P GROUP | HVR-A | HVR-B | HVR-C | HVR-D | HVR-E | HVR-F |
|-----------------------------------------------------------------------------------------------|---------------|---------|-------|-------|-------|-------|-------|-------|
| <b>EDP178</b><br>1 rare                                                                       | DPB1* 178:01e | -       | LFQG  | EEFA  | AAE   | ILEEK | M     | GGPV  |
| <b>EDP679</b><br>1 rare                                                                       | DPB1* 679:01e | -       | PFQG  | EEFA  | AAE   | ILEEK | M     | GGPM  |
| <i>Both sides of this epitype require RARE alleles, review results to confirm assignment.</i> |               |         |       |       |       |       |       |       |

OR

| EPITYPE                                                                                       | ALLELES       | P GROUP | HVR-A | HVR-B | HVR-C | HVR-D | HVR-E | HVR-F |
|-----------------------------------------------------------------------------------------------|---------------|---------|-------|-------|-------|-------|-------|-------|
| <b>EDP178</b><br>1 rare                                                                       | DPB1* 178:01e | -       | LFQG  | EEFA  | AAE   | ILEEK | M     | GGPV  |
| <b>EDP592</b><br>1 rare                                                                       | DPB1* 592:01e | -       | LFQG  | EEFA  | AAE   | ILEEK | M     | GGPR  |
| <i>Both sides of this epitype require RARE alleles, review results to confirm assignment.</i> |               |         |       |       |       |       |       |       |

OR

| EPITYPE                                                                                       | ALLELES       | P GROUP | HVR-A | HVR-B | HVR-C | HVR-D | HVR-E | HVR-F |
|-----------------------------------------------------------------------------------------------|---------------|---------|-------|-------|-------|-------|-------|-------|
| <b>EDP178</b><br>1 rare                                                                       | DPB1* 178:01e | -       | LFQG  | EEFA  | AAE   | ILEEK | M     | GGPV  |
| <b>EDP972</b><br>1 rare                                                                       | DPB1* 972:01e | -       | LFQG  | GEFV  | AAE   | ILEEK | M     | GGPM  |
| <i>Both sides of this epitype require RARE alleles, review results to confirm assignment.</i> |               |         |       |       |       |       |       |       |

OR

| EPITYPE | ALLELES | P GROUP | HVR-A | HVR-B | HVR-C | HVR-D | HVR-E | HVR-F |
|---------|---------|---------|-------|-------|-------|-------|-------|-------|
|---------|---------|---------|-------|-------|-------|-------|-------|-------|

|                                                                                               |               |   |      |      |     |       |   |      |
|-----------------------------------------------------------------------------------------------|---------------|---|------|------|-----|-------|---|------|
| <b>EDP178</b><br>1 rare                                                                       | DPB1* 178:01e | - | LFQG | EEFA | AAE | ILEEK | M | GGPV |
| <b>EDP642</b><br>1 rare                                                                       | DPB1* 642:01e | - | LFQG | EEFA | DAE | ILEEK | M | GGPM |
| <i>Both sides of this epitype require RARE alleles, review results to confirm assignment.</i> |               |   |      |      |     |       |   |      |

OR

| EPITYPE                                                                                       | ALLELES        | P GROUP | HVR-A | HVR-B | HVR-C | HVR-D | HVR-E | HVR-F |
|-----------------------------------------------------------------------------------------------|----------------|---------|-------|-------|-------|-------|-------|-------|
| <b>EDP178</b><br>1 rare                                                                       | DPB1* 178:01e  | -       | LFQG  | EEFA  | AAE   | ILEEK | M     | GGPV  |
| <b>EDP1081</b><br>1 rare                                                                      | DPB1* 1081:01e | -       | LFQG  | EEFA  | AAE   | VLEEK | M     | GGPM  |
| <i>Both sides of this epitype require RARE alleles, review results to confirm assignment.</i> |                |         |       |       |       |       |       |       |

OR

| EPITYPE                                                                                       | ALLELES         | P GROUP | HVR-A | HVR-B | HVR-C | HVR-D | HVR-E | HVR-F |
|-----------------------------------------------------------------------------------------------|-----------------|---------|-------|-------|-------|-------|-------|-------|
| <b>EDP178</b><br>1 rare                                                                       | DPB1* 178:01e   | -       | LFQG  | EEFA  | AAE   | ILEEK | M     | GGPV  |
| <b>EDP1135</b><br>1 rare                                                                      | DPB1* 1135:01Ne | -       | LFQG  | EEFA  | AAE   | ILGGE | D     | GRAH  |
| <i>Both sides of this epitype require RARE alleles, review results to confirm assignment.</i> |                 |         |       |       |       |       |       |       |

OR

| EPITYPE                                                                                       | ALLELES       | P GROUP | HVR-A | HVR-B | HVR-C | HVR-D | HVR-E | HVR-F |
|-----------------------------------------------------------------------------------------------|---------------|---------|-------|-------|-------|-------|-------|-------|
| <b>EDP178</b><br>1 rare                                                                       | DPB1* 178:01e | -       | LFQG  | EEFA  | AAE   | ILEEK | M     | GGPV  |
| <b>EDP687</b><br>1 rare                                                                       | DPB1* 687:01e | -       | LFQL  | EEFA  | AAE   | ILEEK | M     | GGPM  |
| <i>Both sides of this epitype require RARE alleles, review results to confirm assignment.</i> |               |         |       |       |       |       |       |       |

OR

| EPITYPE | ALLELES | P GROUP | HVR-A | HVR-B | HVR-C | HVR-D | HVR-E | HVR-F |
|---------|---------|---------|-------|-------|-------|-------|-------|-------|
|---------|---------|---------|-------|-------|-------|-------|-------|-------|

|                                                                                               |               |   |      |      |     |       |   |      |
|-----------------------------------------------------------------------------------------------|---------------|---|------|------|-----|-------|---|------|
| <b>EDP178</b><br>1 rare                                                                       | DPB1* 178:01e | - | LFQG | EEFA | AAE | ILEEK | M | GGPV |
| <b>EDP427</b><br>1 rare                                                                       | DPB1* 427:01e | - | LFQG | EEFA | ATE | ILEEK | M | GGPM |
| <i>Both sides of this epitype require RARE alleles, review results to confirm assignment.</i> |               |   |      |      |     |       |   |      |

OR

| EPITYPE                                                                                       | ALLELES        | P GROUP | HVR-A | HVR-B | HVR-C | HVR-D | HVR-E | HVR-F |
|-----------------------------------------------------------------------------------------------|----------------|---------|-------|-------|-------|-------|-------|-------|
| <b>EDP178</b><br>1 rare                                                                       | DPB1* 178:01e  | -       | LFQG  | EEFA  | AAE   | ILEEK | M     | GGPV  |
| <b>EDP867</b><br>1 rare                                                                       | DPB1* 867:01Ne | -       | LFQG  | EEFA  | CCG   | HPGGE | D     | GRAH  |
| <i>Both sides of this epitype require RARE alleles, review results to confirm assignment.</i> |                |         |       |       |       |       |       |       |

OR

| EPITYPE                                                                                       | ALLELES       | P GROUP | HVR-A | HVR-B | HVR-C | HVR-D | HVR-E | HVR-F |
|-----------------------------------------------------------------------------------------------|---------------|---------|-------|-------|-------|-------|-------|-------|
| <b>EDP177</b><br>1 rare                                                                       | DPB1* 177:01e | -       | LFQG  | EEFA  | AAE   | ILEEK | M     | SGPM  |
| <b>EDP178</b><br>1 rare                                                                       | DPB1* 178:01e | -       | LFQG  | EEFA  | AAE   | ILEEK | M     | GGPV  |
| <i>Both sides of this epitype require RARE alleles, review results to confirm assignment.</i> |               |         |       |       |       |       |       |       |

OR

| EPITYPE                                                                                       | ALLELES       | P GROUP | HVR-A | HVR-B | HVR-C | HVR-D | HVR-E | HVR-F |
|-----------------------------------------------------------------------------------------------|---------------|---------|-------|-------|-------|-------|-------|-------|
| <b>EDP178</b><br>1 rare                                                                       | DPB1* 178:01e | -       | LFQG  | EEFA  | AAE   | ILEEK | M     | GGPV  |
| <b>EDP747</b><br>1 rare                                                                       | DPB1* 747:01e | -       | VFQG  | EEFA  | AAE   | ILEEK | M     | GGPM  |
| <i>Both sides of this epitype require RARE alleles, review results to confirm assignment.</i> |               |         |       |       |       |       |       |       |

OR

| EPITYPE | ALLELES | P GROUP | HVR-A | HVR-B | HVR-C | HVR-D | HVR-E | HVR-F |
|---------|---------|---------|-------|-------|-------|-------|-------|-------|
|---------|---------|---------|-------|-------|-------|-------|-------|-------|

|                                                                                               |                |   |      |      |     |       |   |      |
|-----------------------------------------------------------------------------------------------|----------------|---|------|------|-----|-------|---|------|
| <b>EDP178</b><br>1 rare                                                                       | DPB1* 178:01e  | - | LFQG | EEFA | AAE | ILEEK | M | GGPV |
| <b>EDP1122</b><br>1 rare                                                                      | DPB1* 1122:01e | - | LFQG | EECA | AAE | ILEEK | M | GGPM |
| <i>Both sides of this epitope require RARE alleles, review results to confirm assignment.</i> |                |   |      |      |     |       |   |      |

OR

| EPITYPE                                                                                       | ALLELES       | P GROUP | HVR-A | HVR-B | HVR-C | HVR-D | HVR-E | HVR-F |
|-----------------------------------------------------------------------------------------------|---------------|---------|-------|-------|-------|-------|-------|-------|
| <b>EDP178</b><br>1 rare                                                                       | DPB1* 178:01e | -       | LFQG  | EEFA  | AAE   | ILEEK | M     | GGPV  |
| <b>EDP280</b><br>1 rare                                                                       | DPB1* 280:01e | -       | LFQG  | EEFA  | AAE   | ILEEK | M     | GAPM  |
| <i>Both sides of this epitope require RARE alleles, review results to confirm assignment.</i> |               |         |       |       |       |       |       |       |

OR

| EPITYPE                                                                                       | ALLELES       | P GROUP | HVR-A | HVR-B | HVR-C | HVR-D | HVR-E | HVR-F |
|-----------------------------------------------------------------------------------------------|---------------|---------|-------|-------|-------|-------|-------|-------|
| <b>EDP178</b><br>1 rare                                                                       | DPB1* 178:01e | -       | LFQG  | EEFA  | AAE   | ILEEK | M     | GGPV  |
| <b>EDP230</b><br>1 rare                                                                       | DPB1* 230:01e | -       | LFQG  | EEFA  | AAE   | ILEEK | M     | GWPM  |
| <i>Both sides of this epitope require RARE alleles, review results to confirm assignment.</i> |               |         |       |       |       |       |       |       |

OR

| EPITYPE                                                                                       | ALLELES        | P GROUP | HVR-A | HVR-B | HVR-C | HVR-D | HVR-E | HVR-F |
|-----------------------------------------------------------------------------------------------|----------------|---------|-------|-------|-------|-------|-------|-------|
| <b>EDP178</b><br>1 rare                                                                       | DPB1* 178:01e  | -       | LFQG  | EEFA  | AAE   | ILEEK | M     | GGPV  |
| <b>EDP570</b><br>1 rare                                                                       | DPB1* 911:01Ne | -       | -     | -     | -     | -     | -     | -     |
| <i>Both sides of this epitope require RARE alleles, review results to confirm assignment.</i> |                |         |       |       |       |       |       |       |

OR

| EPITYPE | ALLELES | P GROUP | HVR-A | HVR-B | HVR-C | HVR-D | HVR-E | HVR-F |
|---------|---------|---------|-------|-------|-------|-------|-------|-------|
|         |         |         |       |       |       |       |       |       |

|                                                                                               |               |   |      |      |     |       |   |      |
|-----------------------------------------------------------------------------------------------|---------------|---|------|------|-----|-------|---|------|
| <b>EDP178</b><br>1 rare                                                                       | DPB1* 178:01e | - | LFQG | EEFA | AAE | ILEEK | M | GGPV |
| <b>EDP840</b><br>1 rare                                                                       | DPB1* 840:01e | - | IFQG | EEFA | AAE | ILEEK | M | GGPM |
| <i>Both sides of this epitype require RARE alleles, review results to confirm assignment.</i> |               |   |      |      |     |       |   |      |

OR

| EPITYPE                                                                                       | ALLELES        | P GROUP | HVR-A | HVR-B | HVR-C | HVR-D | HVR-E | HVR-F |
|-----------------------------------------------------------------------------------------------|----------------|---------|-------|-------|-------|-------|-------|-------|
| <b>EDP278</b><br>1 rare                                                                       | DPB1* 278:01e  | -       | LFQG  | EEFA  | AAE   | ILEEK | I     | GGPM  |
| <b>EDP875</b><br>1 rare                                                                       | DPB1* 875:01Ne | -       | FSRD  | RSSR  | -     | -     | -     | -     |
| <i>Both sides of this epitype require RARE alleles, review results to confirm assignment.</i> |                |         |       |       |       |       |       |       |

OR

| EPITYPE                                                                                       | ALLELES       | P GROUP | HVR-A | HVR-B | HVR-C | HVR-D | HVR-E | HVR-F |
|-----------------------------------------------------------------------------------------------|---------------|---------|-------|-------|-------|-------|-------|-------|
| <b>EDP278</b><br>1 rare                                                                       | DPB1* 278:01e | -       | LFQG  | EEFA  | AAE   | ILEEK | I     | GGPM  |
| <b>EDP375</b><br>1 rare                                                                       | DPB1* 375:01e | -       | LFQG  | QEFA  | AAE   | ILEEK | M     | GGPM  |
| <i>Both sides of this epitype require RARE alleles, review results to confirm assignment.</i> |               |         |       |       |       |       |       |       |

OR

| EPITYPE                                                                                       | ALLELES       | P GROUP | HVR-A | HVR-B | HVR-C | HVR-D | HVR-E | HVR-F |
|-----------------------------------------------------------------------------------------------|---------------|---------|-------|-------|-------|-------|-------|-------|
| <b>EDP278</b><br>1 rare                                                                       | DPB1* 278:01e | -       | LFQG  | EEFA  | AAE   | ILEEK | I     | GGPM  |
| <b>EDP686</b><br>1 rare                                                                       | DPB1* 686:01e | -       | LFQG  | EGFA  | AAE   | ILEEK | M     | GGPM  |
| <i>Both sides of this epitype require RARE alleles, review results to confirm assignment.</i> |               |         |       |       |       |       |       |       |

OR

| EPITYPE | ALLELES | P GROUP | HVR-A | HVR-B | HVR-C | HVR-D | HVR-E | HVR-F |
|---------|---------|---------|-------|-------|-------|-------|-------|-------|
|---------|---------|---------|-------|-------|-------|-------|-------|-------|

|                                                                                               |               |   |      |      |     |       |   |      |
|-----------------------------------------------------------------------------------------------|---------------|---|------|------|-----|-------|---|------|
| <b>EDP176</b><br>1 rare                                                                       | DPB1* 176:01e | - | LFQG | EEFA | AAE | ILKEK | M | GGPM |
| <b>EDP278</b><br>1 rare                                                                       | DPB1* 278:01e | - | LFQG | EEFA | AAE | ILEEK | I | GGPM |
| <i>Both sides of this epitype require RARE alleles, review results to confirm assignment.</i> |               |   |      |      |     |       |   |      |

OR

| EPITYPE                                                                                       | ALLELES       | P GROUP | HVR-A | HVR-B | HVR-C | HVR-D | HVR-E | HVR-F |
|-----------------------------------------------------------------------------------------------|---------------|---------|-------|-------|-------|-------|-------|-------|
| <b>EDP278</b><br>1 rare                                                                       | DPB1* 278:01e | -       | LFQG  | EEFA  | AAE   | ILEEK | I     | GGPM  |
| <b>EDP456</b><br>1 rare                                                                       | DPB1* 456:01e | -       | LFQG  | EEFA  | AAE   | ILEVK | M     | GGPM  |
| <i>Both sides of this epitype require RARE alleles, review results to confirm assignment.</i> |               |         |       |       |       |       |       |       |

OR

| EPITYPE                                                                                       | ALLELES        | P GROUP | HVR-A | HVR-B | HVR-C | HVR-D | HVR-E | HVR-F |
|-----------------------------------------------------------------------------------------------|----------------|---------|-------|-------|-------|-------|-------|-------|
| <b>EDP278</b><br>1 rare                                                                       | DPB1* 278:01e  | -       | LFQG  | EEFA  | AAE   | ILEEK | I     | GGPM  |
| <b>EDP1097</b><br>1 rare                                                                      | DPB1* 1097:01e | -       | LFLG  | EEFA  | AAE   | ILEEK | M     | GGPM  |
| <i>Both sides of this epitype require RARE alleles, review results to confirm assignment.</i> |                |         |       |       |       |       |       |       |

OR

| EPITYPE                                                                                       | ALLELES       | P GROUP | HVR-A | HVR-B | HVR-C | HVR-D | HVR-E | HVR-F |
|-----------------------------------------------------------------------------------------------|---------------|---------|-------|-------|-------|-------|-------|-------|
| <b>EDP278</b><br>1 rare                                                                       | DPB1* 278:01e | -       | LFQG  | EEFA  | AAE   | ILEEK | I     | GGPM  |
| <b>EDP303</b><br>1 rare                                                                       | DPB1* 303:01e | -       | LFQG  | EEFA  | AAE   | ILEER | M     | GGPM  |
| <i>Both sides of this epitype require RARE alleles, review results to confirm assignment.</i> |               |         |       |       |       |       |       |       |

OR

| EPITYPE | ALLELES | P GROUP | HVR-A | HVR-B | HVR-C | HVR-D | HVR-E | HVR-F |
|---------|---------|---------|-------|-------|-------|-------|-------|-------|
|---------|---------|---------|-------|-------|-------|-------|-------|-------|

|                                                                                               |               |   |      |      |     |       |   |      |
|-----------------------------------------------------------------------------------------------|---------------|---|------|------|-----|-------|---|------|
| <b>EDP278</b><br>1 rare                                                                       | DPB1* 278:01e | - | LFQG | EEFA | AAE | ILEEK | I | GGPM |
| <b>EDP753</b><br>1 rare                                                                       | DPB1* 753:01e | - | FFQG | EEFA | AAE | ILEEK | M | GGPM |
| <i>Both sides of this epitope require RARE alleles, review results to confirm assignment.</i> |               |   |      |      |     |       |   |      |

OR

| EPITYPE                                                                                       | ALLELES        | P GROUP | HVR-A | HVR-B | HVR-C | HVR-D | HVR-E | HVR-F |
|-----------------------------------------------------------------------------------------------|----------------|---------|-------|-------|-------|-------|-------|-------|
| <b>EDP278</b><br>1 rare                                                                       | DPB1* 278:01e  | -       | LFQG  | EEFA  | AAE   | ILEEK | I     | GGPM  |
| <b>EDP934</b><br>1 rare                                                                       | DPB1* 934:01Qe | -       | LFQG  | EF.A  | AAE   | ILEEK | M     | GGPM  |
| <i>Both sides of this epitope require RARE alleles, review results to confirm assignment.</i> |                |         |       |       |       |       |       |       |

OR

| EPITYPE                                                                                       | ALLELES        | P GROUP | HVR-A | HVR-B | HVR-C | HVR-D | HVR-E | HVR-F |
|-----------------------------------------------------------------------------------------------|----------------|---------|-------|-------|-------|-------|-------|-------|
| <b>EDP278</b><br>1 rare                                                                       | DPB1* 278:01e  | -       | LFQG  | EEFA  | AAE   | ILEEK | I     | GGPM  |
| <b>EDP874</b><br>1 rare                                                                       | DPB1* 874:01Ne | -       | LFQG  | EEFA  | AAE   | ILEEK | C     | -     |
| <i>Both sides of this epitope require RARE alleles, review results to confirm assignment.</i> |                |         |       |       |       |       |       |       |

OR

| EPITYPE                                                                                       | ALLELES       | P GROUP | HVR-A | HVR-B | HVR-C | HVR-D | HVR-E | HVR-F |
|-----------------------------------------------------------------------------------------------|---------------|---------|-------|-------|-------|-------|-------|-------|
| <b>EDP254</b><br>1 rare                                                                       | DPB1* 254:01e | -       | LFQG  | EEFA  | AVE   | ILEEK | M     | GGPM  |
| <b>EDP278</b><br>1 rare                                                                       | DPB1* 278:01e | -       | LFQG  | EEFA  | AAE   | ILEEK | I     | GGPM  |
| <i>Both sides of this epitope require RARE alleles, review results to confirm assignment.</i> |               |         |       |       |       |       |       |       |

OR

| EPITYPE | ALLELES | P GROUP | HVR-A | HVR-B | HVR-C | HVR-D | HVR-E | HVR-F |
|---------|---------|---------|-------|-------|-------|-------|-------|-------|
|---------|---------|---------|-------|-------|-------|-------|-------|-------|



|                                                                                               |               |   |      |      |     |       |   |      |
|-----------------------------------------------------------------------------------------------|---------------|---|------|------|-----|-------|---|------|
| <b>EDP278</b><br>1 rare                                                                       | DPB1* 278:01e | - | LFQG | EEFA | AAE | ILEEK | I | GGPM |
| <b>EDP454</b><br>1 rare                                                                       | DPB1* 454:01e | - | LFQG | EEFA | AAE | ILEEK | M | GEPM |
| <i>Both sides of this epitope require RARE alleles, review results to confirm assignment.</i> |               |   |      |      |     |       |   |      |

OR

| EPITYPE                                                                                       | ALLELES        | P GROUP | HVR-A | HVR-B | HVR-C | HVR-D | HVR-E | HVR-F |
|-----------------------------------------------------------------------------------------------|----------------|---------|-------|-------|-------|-------|-------|-------|
| <b>EDP278</b><br>1 rare                                                                       | DPB1* 278:01e  | -       | LFQG  | EEFA  | AAE   | ILEEK | I     | GGPM  |
| <b>EDP1046</b><br>1 rare                                                                      | DPB1* 1046:01e | -       | LFQG  | EEIA  | AAE   | ILEEK | M     | GGPM  |
| <i>Both sides of this epitope require RARE alleles, review results to confirm assignment.</i> |                |         |       |       |       |       |       |       |

OR

| EPITYPE                                                                                       | ALLELES       | P GROUP | HVR-A | HVR-B | HVR-C | HVR-D | HVR-E | HVR-F |
|-----------------------------------------------------------------------------------------------|---------------|---------|-------|-------|-------|-------|-------|-------|
| <b>EDP278</b><br>1 rare                                                                       | DPB1* 278:01e | -       | LFQG  | EEFA  | AAE   | ILEEK | I     | GGPM  |
| <b>EDP921</b><br>1 rare                                                                       | DPB1* 921:01e | -       | LFQG  | GEFA  | AAE   | ILEEK | M     | GGPM  |
| <i>Both sides of this epitope require RARE alleles, review results to confirm assignment.</i> |               |         |       |       |       |       |       |       |

OR

| EPITYPE                                                                                       | ALLELES        | P GROUP | HVR-A | HVR-B | HVR-C | HVR-D | HVR-E | HVR-F |
|-----------------------------------------------------------------------------------------------|----------------|---------|-------|-------|-------|-------|-------|-------|
| <b>EDP278</b><br>1 rare                                                                       | DPB1* 278:01e  | -       | LFQG  | EEFA  | AAE   | ILEEK | I     | GGPM  |
| <b>EDP871</b><br>1 rare                                                                       | DPB1* 871:01Ne | -       | LFQG  | EEFA  | AAE   | HPGGE | D     | GRAH  |
| <i>Both sides of this epitope require RARE alleles, review results to confirm assignment.</i> |                |         |       |       |       |       |       |       |

OR

| EPITYPE | ALLELES | P GROUP | HVR-A | HVR-B | HVR-C | HVR-D | HVR-E | HVR-F |
|---------|---------|---------|-------|-------|-------|-------|-------|-------|
|---------|---------|---------|-------|-------|-------|-------|-------|-------|

|                                                                                               |               |   |      |      |     |       |   |      |
|-----------------------------------------------------------------------------------------------|---------------|---|------|------|-----|-------|---|------|
| <b>EDP278</b><br>1 rare                                                                       | DPB1* 278:01e | - | LFQG | EEFA | AAE | ILEEK | I | GGPM |
| <b>EDP399</b><br>1 rare                                                                       | DPB1* 399:01e | - | LFQG | EEFA | AAE | IVEEK | M | GGPM |
| <i>Both sides of this epitype require RARE alleles, review results to confirm assignment.</i> |               |   |      |      |     |       |   |      |

OR

| EPITYPE                                                                                       | ALLELES       | P GROUP | HVR-A | HVR-B | HVR-C | HVR-D | HVR-E | HVR-F |
|-----------------------------------------------------------------------------------------------|---------------|---------|-------|-------|-------|-------|-------|-------|
| <b>EDP278</b><br>1 rare                                                                       | DPB1* 278:01e | -       | LFQG  | EEFA  | AAE   | ILEEK | I     | GGPM  |
| <b>EDP319</b><br>1 rare                                                                       | DPB1* 319:01e | -       | LFQG  | EEFA  | AAE   | IQEEK | M     | GGPM  |
| <i>Both sides of this epitype require RARE alleles, review results to confirm assignment.</i> |               |         |       |       |       |       |       |       |

OR

| EPITYPE                                                                                       | ALLELES       | P GROUP | HVR-A | HVR-B | HVR-C | HVR-D | HVR-E | HVR-F |
|-----------------------------------------------------------------------------------------------|---------------|---------|-------|-------|-------|-------|-------|-------|
| <b>EDP179</b><br>1 rare                                                                       | DPB1* 179:01e | -       | LFQG  | EEFA  | AAE   | LLEER | M     | GGPM  |
| <b>EDP278</b><br>1 rare                                                                       | DPB1* 278:01e | -       | LFQG  | EEFA  | AAE   | ILEEK | I     | GGPM  |
| <i>Both sides of this epitype require RARE alleles, review results to confirm assignment.</i> |               |         |       |       |       |       |       |       |

OR

| EPITYPE                                                                                       | ALLELES       | P GROUP | HVR-A | HVR-B | HVR-C | HVR-D | HVR-E | HVR-F |
|-----------------------------------------------------------------------------------------------|---------------|---------|-------|-------|-------|-------|-------|-------|
| <b>EDP278</b><br>1 rare                                                                       | DPB1* 278:01e | -       | LFQG  | EEFA  | AAE   | ILEEK | I     | GGPM  |
| <b>EDP679</b><br>1 rare                                                                       | DPB1* 679:01e | -       | PFQG  | EEFA  | AAE   | ILEEK | M     | GGPM  |
| <i>Both sides of this epitype require RARE alleles, review results to confirm assignment.</i> |               |         |       |       |       |       |       |       |

OR

| EPITYPE | ALLELES | P GROUP | HVR-A | HVR-B | HVR-C | HVR-D | HVR-E | HVR-F |
|---------|---------|---------|-------|-------|-------|-------|-------|-------|
|---------|---------|---------|-------|-------|-------|-------|-------|-------|

|                                                                                               |               |   |      |      |     |       |   |      |
|-----------------------------------------------------------------------------------------------|---------------|---|------|------|-----|-------|---|------|
| <b>EDP278</b><br>1 rare                                                                       | DPB1* 278:01e | - | LFQG | EEFA | AAE | ILEEK | I | GGPM |
| <b>EDP592</b><br>1 rare                                                                       | DPB1* 592:01e | - | LFQG | EEFA | AAE | ILEEK | M | GGPR |
| <i>Both sides of this epitype require RARE alleles, review results to confirm assignment.</i> |               |   |      |      |     |       |   |      |

OR

| EPITYPE                                                                                       | ALLELES       | P GROUP | HVR-A | HVR-B | HVR-C | HVR-D | HVR-E | HVR-F |
|-----------------------------------------------------------------------------------------------|---------------|---------|-------|-------|-------|-------|-------|-------|
| <b>EDP278</b><br>1 rare                                                                       | DPB1* 278:01e | -       | LFQG  | EEFA  | AAE   | ILEEK | I     | GGPM  |
| <b>EDP972</b><br>1 rare                                                                       | DPB1* 972:01e | -       | LFQG  | GEFV  | AAE   | ILEEK | M     | GGPM  |
| <i>Both sides of this epitype require RARE alleles, review results to confirm assignment.</i> |               |         |       |       |       |       |       |       |

OR

| EPITYPE                                                                                       | ALLELES       | P GROUP | HVR-A | HVR-B | HVR-C | HVR-D | HVR-E | HVR-F |
|-----------------------------------------------------------------------------------------------|---------------|---------|-------|-------|-------|-------|-------|-------|
| <b>EDP278</b><br>1 rare                                                                       | DPB1* 278:01e | -       | LFQG  | EEFA  | AAE   | ILEEK | I     | GGPM  |
| <b>EDP642</b><br>1 rare                                                                       | DPB1* 642:01e | -       | LFQG  | EEFA  | DAE   | ILEEK | M     | GGPM  |
| <i>Both sides of this epitype require RARE alleles, review results to confirm assignment.</i> |               |         |       |       |       |       |       |       |

OR

| EPITYPE                                                                                       | ALLELES        | P GROUP | HVR-A | HVR-B | HVR-C | HVR-D | HVR-E | HVR-F |
|-----------------------------------------------------------------------------------------------|----------------|---------|-------|-------|-------|-------|-------|-------|
| <b>EDP278</b><br>1 rare                                                                       | DPB1* 278:01e  | -       | LFQG  | EEFA  | AAE   | ILEEK | I     | GGPM  |
| <b>EDP1081</b><br>1 rare                                                                      | DPB1* 1081:01e | -       | LFQG  | EEFA  | AAE   | VLEEK | M     | GGPM  |
| <i>Both sides of this epitype require RARE alleles, review results to confirm assignment.</i> |                |         |       |       |       |       |       |       |

OR

| EPITYPE | ALLELES | P GROUP | HVR-A | HVR-B | HVR-C | HVR-D | HVR-E | HVR-F |
|---------|---------|---------|-------|-------|-------|-------|-------|-------|
|---------|---------|---------|-------|-------|-------|-------|-------|-------|

|                                                                                               |                 |   |      |      |     |       |   |      |
|-----------------------------------------------------------------------------------------------|-----------------|---|------|------|-----|-------|---|------|
| <b>EDP278</b><br>1 rare                                                                       | DPB1* 278:01e   | - | LFQG | EEFA | AAE | ILEEK | I | GGPM |
| <b>EDP1135</b><br>1 rare                                                                      | DPB1* 1135:01Ne | - | LFQG | EEFA | AAE | ILGGE | D | GRAH |
| <i>Both sides of this epitope require RARE alleles, review results to confirm assignment.</i> |                 |   |      |      |     |       |   |      |

OR

| EPITYPE                                                                                       | ALLELES       | P GROUP | HVR-A | HVR-B | HVR-C | HVR-D | HVR-E | HVR-F |
|-----------------------------------------------------------------------------------------------|---------------|---------|-------|-------|-------|-------|-------|-------|
| <b>EDP278</b><br>1 rare                                                                       | DPB1* 278:01e | -       | LFQG  | EEFA  | AAE   | ILEEK | I     | GGPM  |
| <b>EDP687</b><br>1 rare                                                                       | DPB1* 687:01e | -       | LFQL  | EEFA  | AAE   | ILEEK | M     | GGPM  |
| <i>Both sides of this epitope require RARE alleles, review results to confirm assignment.</i> |               |         |       |       |       |       |       |       |

OR

| EPITYPE                                                                                       | ALLELES       | P GROUP | HVR-A | HVR-B | HVR-C | HVR-D | HVR-E | HVR-F |
|-----------------------------------------------------------------------------------------------|---------------|---------|-------|-------|-------|-------|-------|-------|
| <b>EDP278</b><br>1 rare                                                                       | DPB1* 278:01e | -       | LFQG  | EEFA  | AAE   | ILEEK | I     | GGPM  |
| <b>EDP427</b><br>1 rare                                                                       | DPB1* 427:01e | -       | LFQG  | EEFA  | ATE   | ILEEK | M     | GGPM  |
| <i>Both sides of this epitope require RARE alleles, review results to confirm assignment.</i> |               |         |       |       |       |       |       |       |

OR

| EPITYPE                                                                                       | ALLELES        | P GROUP | HVR-A | HVR-B | HVR-C | HVR-D | HVR-E | HVR-F |
|-----------------------------------------------------------------------------------------------|----------------|---------|-------|-------|-------|-------|-------|-------|
| <b>EDP278</b><br>1 rare                                                                       | DPB1* 278:01e  | -       | LFQG  | EEFA  | AAE   | ILEEK | I     | GGPM  |
| <b>EDP867</b><br>1 rare                                                                       | DPB1* 867:01Ne | -       | LFQG  | EEFA  | CCG   | HPGGE | D     | GRAH  |
| <i>Both sides of this epitope require RARE alleles, review results to confirm assignment.</i> |                |         |       |       |       |       |       |       |

OR

| EPITYPE | ALLELES | P GROUP | HVR-A | HVR-B | HVR-C | HVR-D | HVR-E | HVR-F |
|---------|---------|---------|-------|-------|-------|-------|-------|-------|
|---------|---------|---------|-------|-------|-------|-------|-------|-------|

|                                                                                               |               |   |      |      |     |       |   |      |
|-----------------------------------------------------------------------------------------------|---------------|---|------|------|-----|-------|---|------|
| <b>EDP177</b><br>1 rare                                                                       | DPB1* 177:01e | - | LFQG | EEFA | AAE | ILEEK | M | SGPM |
| <b>EDP278</b><br>1 rare                                                                       | DPB1* 278:01e | - | LFQG | EEFA | AAE | ILEEK | I | GGPM |
| <i>Both sides of this epitype require RARE alleles, review results to confirm assignment.</i> |               |   |      |      |     |       |   |      |

OR

| EPITYPE                                                                                       | ALLELES       | P GROUP | HVR-A | HVR-B | HVR-C | HVR-D | HVR-E | HVR-F |
|-----------------------------------------------------------------------------------------------|---------------|---------|-------|-------|-------|-------|-------|-------|
| <b>EDP278</b><br>1 rare                                                                       | DPB1* 278:01e | -       | LFQG  | EEFA  | AAE   | ILEEK | I     | GGPM  |
| <b>EDP747</b><br>1 rare                                                                       | DPB1* 747:01e | -       | VFQG  | EEFA  | AAE   | ILEEK | M     | GGPM  |
| <i>Both sides of this epitype require RARE alleles, review results to confirm assignment.</i> |               |         |       |       |       |       |       |       |

OR

| EPITYPE                                                                                       | ALLELES        | P GROUP | HVR-A | HVR-B | HVR-C | HVR-D | HVR-E | HVR-F |
|-----------------------------------------------------------------------------------------------|----------------|---------|-------|-------|-------|-------|-------|-------|
| <b>EDP278</b><br>1 rare                                                                       | DPB1* 278:01e  | -       | LFQG  | EEFA  | AAE   | ILEEK | I     | GGPM  |
| <b>EDP1122</b><br>1 rare                                                                      | DPB1* 1122:01e | -       | LFQG  | EECA  | AAE   | ILEEK | M     | GGPM  |
| <i>Both sides of this epitype require RARE alleles, review results to confirm assignment.</i> |                |         |       |       |       |       |       |       |

OR

| EPITYPE                                                                                       | ALLELES       | P GROUP | HVR-A | HVR-B | HVR-C | HVR-D | HVR-E | HVR-F |
|-----------------------------------------------------------------------------------------------|---------------|---------|-------|-------|-------|-------|-------|-------|
| <b>EDP278</b><br>1 rare                                                                       | DPB1* 278:01e | -       | LFQG  | EEFA  | AAE   | ILEEK | I     | GGPM  |
| <b>EDP280</b><br>1 rare                                                                       | DPB1* 280:01e | -       | LFQG  | EEFA  | AAE   | ILEEK | M     | GAPM  |
| <i>Both sides of this epitype require RARE alleles, review results to confirm assignment.</i> |               |         |       |       |       |       |       |       |

OR

| EPITYPE | ALLELES | P GROUP | HVR-A | HVR-B | HVR-C | HVR-D | HVR-E | HVR-F |
|---------|---------|---------|-------|-------|-------|-------|-------|-------|
|---------|---------|---------|-------|-------|-------|-------|-------|-------|

|                                                                                               |               |   |      |      |     |       |   |      |
|-----------------------------------------------------------------------------------------------|---------------|---|------|------|-----|-------|---|------|
| <b>EDP230</b><br>1 rare                                                                       | DPB1* 230:01e | - | LFQG | EEFA | AAE | ILEEK | M | GWPM |
| <b>EDP278</b><br>1 rare                                                                       | DPB1* 278:01e | - | LFQG | EEFA | AAE | ILEEK | I | GGPM |
| <i>Both sides of this epitype require RARE alleles, review results to confirm assignment.</i> |               |   |      |      |     |       |   |      |

OR

| EPITYPE                                                                                       | ALLELES        | P GROUP | HVR-A | HVR-B | HVR-C | HVR-D | HVR-E | HVR-F |
|-----------------------------------------------------------------------------------------------|----------------|---------|-------|-------|-------|-------|-------|-------|
| <b>EDP278</b><br>1 rare                                                                       | DPB1* 278:01e  | -       | LFQG  | EEFA  | AAE   | ILEEK | I     | GGPM  |
| <b>EDP570</b><br>1 rare                                                                       | DPB1* 911:01Ne | -       | -     | -     | -     | -     | -     | -     |
| <i>Both sides of this epitype require RARE alleles, review results to confirm assignment.</i> |                |         |       |       |       |       |       |       |

OR

| EPITYPE                                                                                       | ALLELES       | P GROUP | HVR-A | HVR-B | HVR-C | HVR-D | HVR-E | HVR-F |
|-----------------------------------------------------------------------------------------------|---------------|---------|-------|-------|-------|-------|-------|-------|
| <b>EDP278</b><br>1 rare                                                                       | DPB1* 278:01e | -       | LFQG  | EEFA  | AAE   | ILEEK | I     | GGPM  |
| <b>EDP840</b><br>1 rare                                                                       | DPB1* 840:01e | -       | IFQG  | EEFA  | AAE   | ILEEK | M     | GGPM  |
| <i>Both sides of this epitype require RARE alleles, review results to confirm assignment.</i> |               |         |       |       |       |       |       |       |

OR

| EPITYPE                                                                                       | ALLELES        | P GROUP | HVR-A | HVR-B | HVR-C | HVR-D | HVR-E | HVR-F |
|-----------------------------------------------------------------------------------------------|----------------|---------|-------|-------|-------|-------|-------|-------|
| <b>EDP375</b><br>1 rare                                                                       | DPB1* 375:01e  | -       | LFQG  | QEFA  | AAE   | ILEEK | M     | GGPM  |
| <b>EDP875</b><br>1 rare                                                                       | DPB1* 875:01Ne | -       | FSRD  | RSSR  | -     | -     | -     | -     |
| <i>Both sides of this epitype require RARE alleles, review results to confirm assignment.</i> |                |         |       |       |       |       |       |       |

OR

| EPITYPE | ALLELES | P GROUP | HVR-A | HVR-B | HVR-C | HVR-D | HVR-E | HVR-F |
|---------|---------|---------|-------|-------|-------|-------|-------|-------|
|---------|---------|---------|-------|-------|-------|-------|-------|-------|

|                                                                                               |                |   |      |      |     |       |   |      |
|-----------------------------------------------------------------------------------------------|----------------|---|------|------|-----|-------|---|------|
| <b>EDP686</b><br>1 rare                                                                       | DPB1* 686:01e  | - | LFQG | EGFA | AAE | ILEEK | M | GGPM |
| <b>EDP875</b><br>1 rare                                                                       | DPB1* 875:01Ne | - | FSRD | RSSR | -   | -     | - | -    |
| <i>Both sides of this epitope require RARE alleles, review results to confirm assignment.</i> |                |   |      |      |     |       |   |      |

OR

| EPITYPE                                                                                       | ALLELES        | P GROUP | HVR-A | HVR-B | HVR-C | HVR-D | HVR-E | HVR-F |
|-----------------------------------------------------------------------------------------------|----------------|---------|-------|-------|-------|-------|-------|-------|
| <b>EDP176</b><br>1 rare                                                                       | DPB1* 176:01e  | -       | LFQG  | EEFA  | AAE   | ILKEK | M     | GGPM  |
| <b>EDP875</b><br>1 rare                                                                       | DPB1* 875:01Ne | -       | FSRD  | RSSR  | -     | -     | -     | -     |
| <i>Both sides of this epitope require RARE alleles, review results to confirm assignment.</i> |                |         |       |       |       |       |       |       |

OR

| EPITYPE                                                                                       | ALLELES        | P GROUP | HVR-A | HVR-B | HVR-C | HVR-D | HVR-E | HVR-F |
|-----------------------------------------------------------------------------------------------|----------------|---------|-------|-------|-------|-------|-------|-------|
| <b>EDP456</b><br>1 rare                                                                       | DPB1* 456:01e  | -       | LFQG  | EEFA  | AAE   | ILEVK | M     | GGPM  |
| <b>EDP875</b><br>1 rare                                                                       | DPB1* 875:01Ne | -       | FSRD  | RSSR  | -     | -     | -     | -     |
| <i>Both sides of this epitope require RARE alleles, review results to confirm assignment.</i> |                |         |       |       |       |       |       |       |

OR

| EPITYPE                                                                                       | ALLELES        | P GROUP | HVR-A | HVR-B | HVR-C | HVR-D | HVR-E | HVR-F |
|-----------------------------------------------------------------------------------------------|----------------|---------|-------|-------|-------|-------|-------|-------|
| <b>EDP875</b><br>1 rare                                                                       | DPB1* 875:01Ne | -       | FSRD  | RSSR  | -     | -     | -     | -     |
| <b>EDP1097</b><br>1 rare                                                                      | DPB1* 1097:01e | -       | LFLG  | EEFA  | AAE   | ILEEK | M     | GGPM  |
| <i>Both sides of this epitope require RARE alleles, review results to confirm assignment.</i> |                |         |       |       |       |       |       |       |

OR

| EPITYPE | ALLELES | P GROUP | HVR-A | HVR-B | HVR-C | HVR-D | HVR-E | HVR-F |
|---------|---------|---------|-------|-------|-------|-------|-------|-------|
|---------|---------|---------|-------|-------|-------|-------|-------|-------|

|                                                                                               |                |   |      |      |     |       |   |      |
|-----------------------------------------------------------------------------------------------|----------------|---|------|------|-----|-------|---|------|
| <b>EDP303</b><br>1 rare                                                                       | DPB1* 303:01e  | - | LFQG | EEFA | AAE | ILEER | M | GGPM |
| <b>EDP875</b><br>1 rare                                                                       | DPB1* 875:01Ne | - | FSRD | RSSR | -   | -     | - | -    |
| <i>Both sides of this epitype require RARE alleles, review results to confirm assignment.</i> |                |   |      |      |     |       |   |      |

OR

| EPITYPE                                                                                       | ALLELES        | P GROUP | HVR-A | HVR-B | HVR-C | HVR-D | HVR-E | HVR-F |
|-----------------------------------------------------------------------------------------------|----------------|---------|-------|-------|-------|-------|-------|-------|
| <b>EDP753</b><br>1 rare                                                                       | DPB1* 753:01e  | -       | FFQG  | EEFA  | AAE   | ILEEK | M     | GGPM  |
| <b>EDP875</b><br>1 rare                                                                       | DPB1* 875:01Ne | -       | FSRD  | RSSR  | -     | -     | -     | -     |
| <i>Both sides of this epitype require RARE alleles, review results to confirm assignment.</i> |                |         |       |       |       |       |       |       |

OR

| EPITYPE                                                                                       | ALLELES        | P GROUP | HVR-A | HVR-B | HVR-C | HVR-D | HVR-E | HVR-F |
|-----------------------------------------------------------------------------------------------|----------------|---------|-------|-------|-------|-------|-------|-------|
| <b>EDP875</b><br>1 rare                                                                       | DPB1* 875:01Ne | -       | FSRD  | RSSR  | -     | -     | -     | -     |
| <b>EDP934</b><br>1 rare                                                                       | DPB1* 934:01Qe | -       | LFQG  | EF.A  | AAE   | ILEEK | M     | GGPM  |
| <i>Both sides of this epitype require RARE alleles, review results to confirm assignment.</i> |                |         |       |       |       |       |       |       |

OR

| EPITYPE                                                                                       | ALLELES        | P GROUP | HVR-A | HVR-B | HVR-C | HVR-D | HVR-E | HVR-F |
|-----------------------------------------------------------------------------------------------|----------------|---------|-------|-------|-------|-------|-------|-------|
| <b>EDP874</b><br>1 rare                                                                       | DPB1* 874:01Ne | -       | LFQG  | EEFA  | AAE   | ILEEK | C     | -     |
| <b>EDP875</b><br>1 rare                                                                       | DPB1* 875:01Ne | -       | FSRD  | RSSR  | -     | -     | -     | -     |
| <i>Both sides of this epitype require RARE alleles, review results to confirm assignment.</i> |                |         |       |       |       |       |       |       |

OR

| EPITYPE | ALLELES | P GROUP | HVR-A | HVR-B | HVR-C | HVR-D | HVR-E | HVR-F |
|---------|---------|---------|-------|-------|-------|-------|-------|-------|
|---------|---------|---------|-------|-------|-------|-------|-------|-------|



|                                                                                               |                |   |      |      |     |       |   |      |
|-----------------------------------------------------------------------------------------------|----------------|---|------|------|-----|-------|---|------|
| <b>EDP254</b><br>1 rare                                                                       | DPB1* 254:01e  | - | LFQG | EEFA | AVE | ILEEK | M | GGPM |
| <b>EDP875</b><br>1 rare                                                                       | DPB1* 875:01Ne | - | FSRD | RSSR | -   | -     | - | -    |
| <i>Both sides of this epitope require RARE alleles, review results to confirm assignment.</i> |                |   |      |      |     |       |   |      |

OR

| EPITYPE                                                                                       | ALLELES        | P GROUP | HVR-A | HVR-B | HVR-C | HVR-D | HVR-E | HVR-F |
|-----------------------------------------------------------------------------------------------|----------------|---------|-------|-------|-------|-------|-------|-------|
| <b>EDP454</b><br>1 rare                                                                       | DPB1* 454:01e  | -       | LFQG  | EEFA  | AAE   | ILEEK | M     | GEPM  |
| <b>EDP875</b><br>1 rare                                                                       | DPB1* 875:01Ne | -       | FSRD  | RSSR  | -     | -     | -     | -     |
| <i>Both sides of this epitope require RARE alleles, review results to confirm assignment.</i> |                |         |       |       |       |       |       |       |

OR

| EPITYPE                                                                                       | ALLELES        | P GROUP | HVR-A | HVR-B | HVR-C | HVR-D | HVR-E | HVR-F |
|-----------------------------------------------------------------------------------------------|----------------|---------|-------|-------|-------|-------|-------|-------|
| <b>EDP875</b><br>1 rare                                                                       | DPB1* 875:01Ne | -       | FSRD  | RSSR  | -     | -     | -     | -     |
| <b>EDP1046</b><br>1 rare                                                                      | DPB1* 1046:01e | -       | LFQG  | EEIA  | AAE   | ILEEK | M     | GGPM  |
| <i>Both sides of this epitope require RARE alleles, review results to confirm assignment.</i> |                |         |       |       |       |       |       |       |

OR

| EPITYPE                                                                                       | ALLELES        | P GROUP | HVR-A | HVR-B | HVR-C | HVR-D | HVR-E | HVR-F |
|-----------------------------------------------------------------------------------------------|----------------|---------|-------|-------|-------|-------|-------|-------|
| <b>EDP875</b><br>1 rare                                                                       | DPB1* 875:01Ne | -       | FSRD  | RSSR  | -     | -     | -     | -     |
| <b>EDP921</b><br>1 rare                                                                       | DPB1* 921:01e  | -       | LFQG  | GEFA  | AAE   | ILEEK | M     | GGPM  |
| <i>Both sides of this epitope require RARE alleles, review results to confirm assignment.</i> |                |         |       |       |       |       |       |       |

OR

| EPITYPE | ALLELES | P GROUP | HVR-A | HVR-B | HVR-C | HVR-D | HVR-E | HVR-F |
|---------|---------|---------|-------|-------|-------|-------|-------|-------|
|---------|---------|---------|-------|-------|-------|-------|-------|-------|

|                                                                                               |                |   |      |      |     |       |   |      |
|-----------------------------------------------------------------------------------------------|----------------|---|------|------|-----|-------|---|------|
| <b>EDP871</b><br>1 rare                                                                       | DPB1* 871:01Ne | - | LFQG | EEFA | AAE | HPGGE | D | GRAH |
| <b>EDP875</b><br>1 rare                                                                       | DPB1* 875:01Ne | - | FSRD | RSSR | -   | -     | - | -    |
| <i>Both sides of this epitype require RARE alleles, review results to confirm assignment.</i> |                |   |      |      |     |       |   |      |

OR

| EPITYPE                                                                                       | ALLELES        | P GROUP | HVR-A | HVR-B | HVR-C | HVR-D | HVR-E | HVR-F |
|-----------------------------------------------------------------------------------------------|----------------|---------|-------|-------|-------|-------|-------|-------|
| <b>EDP399</b><br>1 rare                                                                       | DPB1* 399:01e  | -       | LFQG  | EEFA  | AAE   | IVEEK | M     | GGPM  |
| <b>EDP875</b><br>1 rare                                                                       | DPB1* 875:01Ne | -       | FSRD  | RSSR  | -     | -     | -     | -     |
| <i>Both sides of this epitype require RARE alleles, review results to confirm assignment.</i> |                |         |       |       |       |       |       |       |

OR

| EPITYPE                                                                                       | ALLELES        | P GROUP | HVR-A | HVR-B | HVR-C | HVR-D | HVR-E | HVR-F |
|-----------------------------------------------------------------------------------------------|----------------|---------|-------|-------|-------|-------|-------|-------|
| <b>EDP319</b><br>1 rare                                                                       | DPB1* 319:01e  | -       | LFQG  | EEFA  | AAE   | IQEEK | M     | GGPM  |
| <b>EDP875</b><br>1 rare                                                                       | DPB1* 875:01Ne | -       | FSRD  | RSSR  | -     | -     | -     | -     |
| <i>Both sides of this epitype require RARE alleles, review results to confirm assignment.</i> |                |         |       |       |       |       |       |       |

OR

| EPITYPE                                                                                       | ALLELES        | P GROUP | HVR-A | HVR-B | HVR-C | HVR-D | HVR-E | HVR-F |
|-----------------------------------------------------------------------------------------------|----------------|---------|-------|-------|-------|-------|-------|-------|
| <b>EDP179</b><br>1 rare                                                                       | DPB1* 179:01e  | -       | LFQG  | EEFA  | AAE   | LLEER | M     | GGPM  |
| <b>EDP875</b><br>1 rare                                                                       | DPB1* 875:01Ne | -       | FSRD  | RSSR  | -     | -     | -     | -     |
| <i>Both sides of this epitype require RARE alleles, review results to confirm assignment.</i> |                |         |       |       |       |       |       |       |

OR

| EPITYPE | ALLELES | P GROUP | HVR-A | HVR-B | HVR-C | HVR-D | HVR-E | HVR-F |
|---------|---------|---------|-------|-------|-------|-------|-------|-------|
|---------|---------|---------|-------|-------|-------|-------|-------|-------|

|                                                                                               |                |   |      |      |     |       |   |      |
|-----------------------------------------------------------------------------------------------|----------------|---|------|------|-----|-------|---|------|
| <b>EDP679</b><br>1 rare                                                                       | DPB1* 679:01e  | - | PFQG | EEFA | AAE | ILEEK | M | GGPM |
| <b>EDP875</b><br>1 rare                                                                       | DPB1* 875:01Ne | - | FSRD | RSSR | -   | -     | - | -    |
| <i>Both sides of this epitype require RARE alleles, review results to confirm assignment.</i> |                |   |      |      |     |       |   |      |

OR

| EPITYPE                                                                                       | ALLELES        | P GROUP | HVR-A | HVR-B | HVR-C | HVR-D | HVR-E | HVR-F |
|-----------------------------------------------------------------------------------------------|----------------|---------|-------|-------|-------|-------|-------|-------|
| <b>EDP592</b><br>1 rare                                                                       | DPB1* 592:01e  | -       | LFQG  | EEFA  | AAE   | ILEEK | M     | GGPR  |
| <b>EDP875</b><br>1 rare                                                                       | DPB1* 875:01Ne | -       | FSRD  | RSSR  | -     | -     | -     | -     |
| <i>Both sides of this epitype require RARE alleles, review results to confirm assignment.</i> |                |         |       |       |       |       |       |       |

OR

| EPITYPE                                                                                       | ALLELES        | P GROUP | HVR-A | HVR-B | HVR-C | HVR-D | HVR-E | HVR-F |
|-----------------------------------------------------------------------------------------------|----------------|---------|-------|-------|-------|-------|-------|-------|
| <b>EDP875</b><br>1 rare                                                                       | DPB1* 875:01Ne | -       | FSRD  | RSSR  | -     | -     | -     | -     |
| <b>EDP972</b><br>1 rare                                                                       | DPB1* 972:01e  | -       | LFQG  | GEFV  | AAE   | ILEEK | M     | GGPM  |
| <i>Both sides of this epitype require RARE alleles, review results to confirm assignment.</i> |                |         |       |       |       |       |       |       |

OR

| EPITYPE                                                                                       | ALLELES        | P GROUP | HVR-A | HVR-B | HVR-C | HVR-D | HVR-E | HVR-F |
|-----------------------------------------------------------------------------------------------|----------------|---------|-------|-------|-------|-------|-------|-------|
| <b>EDP642</b><br>1 rare                                                                       | DPB1* 642:01e  | -       | LFQG  | EEFA  | DAE   | ILEEK | M     | GGPM  |
| <b>EDP875</b><br>1 rare                                                                       | DPB1* 875:01Ne | -       | FSRD  | RSSR  | -     | -     | -     | -     |
| <i>Both sides of this epitype require RARE alleles, review results to confirm assignment.</i> |                |         |       |       |       |       |       |       |

OR

| EPITYPE | ALLELES | P GROUP | HVR-A | HVR-B | HVR-C | HVR-D | HVR-E | HVR-F |
|---------|---------|---------|-------|-------|-------|-------|-------|-------|
|---------|---------|---------|-------|-------|-------|-------|-------|-------|

|                                                                                               |                |   |      |      |     |       |   |      |
|-----------------------------------------------------------------------------------------------|----------------|---|------|------|-----|-------|---|------|
| <b>EDP875</b><br>1 rare                                                                       | DPB1* 875:01Ne | - | FSRD | RSSR | -   | -     | - | -    |
| <b>EDP1081</b><br>1 rare                                                                      | DPB1* 1081:01e | - | LFQG | EEFA | AAE | VLEEK | M | GGPM |
| <i>Both sides of this epitope require RARE alleles, review results to confirm assignment.</i> |                |   |      |      |     |       |   |      |

OR

| EPITYPE                                                                                       | ALLELES         | P GROUP | HVR-A | HVR-B | HVR-C | HVR-D | HVR-E | HVR-F |
|-----------------------------------------------------------------------------------------------|-----------------|---------|-------|-------|-------|-------|-------|-------|
| <b>EDP875</b><br>1 rare                                                                       | DPB1* 875:01Ne  | -       | FSRD  | RSSR  | -     | -     | -     | -     |
| <b>EDP1135</b><br>1 rare                                                                      | DPB1* 1135:01Ne | -       | LFQG  | EEFA  | AAE   | ILGGE | D     | GRAH  |
| <i>Both sides of this epitope require RARE alleles, review results to confirm assignment.</i> |                 |         |       |       |       |       |       |       |

OR

| EPITYPE                                                                                       | ALLELES        | P GROUP | HVR-A | HVR-B | HVR-C | HVR-D | HVR-E | HVR-F |
|-----------------------------------------------------------------------------------------------|----------------|---------|-------|-------|-------|-------|-------|-------|
| <b>EDP427</b><br>1 rare                                                                       | DPB1* 427:01e  | -       | LFQG  | EEFA  | ATE   | ILEEK | M     | GGPM  |
| <b>EDP875</b><br>1 rare                                                                       | DPB1* 875:01Ne | -       | FSRD  | RSSR  | -     | -     | -     | -     |
| <i>Both sides of this epitope require RARE alleles, review results to confirm assignment.</i> |                |         |       |       |       |       |       |       |

OR

| EPITYPE                                                                                       | ALLELES        | P GROUP | HVR-A | HVR-B | HVR-C | HVR-D | HVR-E | HVR-F |
|-----------------------------------------------------------------------------------------------|----------------|---------|-------|-------|-------|-------|-------|-------|
| <b>EDP867</b><br>1 rare                                                                       | DPB1* 867:01Ne | -       | LFQG  | EEFA  | CCG   | HPGGE | D     | GRAH  |
| <b>EDP875</b><br>1 rare                                                                       | DPB1* 875:01Ne | -       | FSRD  | RSSR  | -     | -     | -     | -     |
| <i>Both sides of this epitope require RARE alleles, review results to confirm assignment.</i> |                |         |       |       |       |       |       |       |

OR

| EPITYPE | ALLELES | P GROUP | HVR-A | HVR-B | HVR-C | HVR-D | HVR-E | HVR-F |
|---------|---------|---------|-------|-------|-------|-------|-------|-------|
|---------|---------|---------|-------|-------|-------|-------|-------|-------|

|                                                                                               |                |   |             |             |     |       |   |             |
|-----------------------------------------------------------------------------------------------|----------------|---|-------------|-------------|-----|-------|---|-------------|
| <b>EDP177</b><br>1 rare                                                                       | DPB1* 177:01e  | - | LFQG        | EEFA        | AAE | ILEEK | M | <b>SGPM</b> |
| <b>EDP875</b><br>1 rare                                                                       | DPB1* 875:01Ne | - | <b>FSRD</b> | <b>RSSR</b> | -   | -     | - | -           |
| <i>Both sides of this epitope require RARE alleles, review results to confirm assignment.</i> |                |   |             |             |     |       |   |             |

OR

| EPITYPE                                                                                       | ALLELES        | P GROUP | HVR-A       | HVR-B       | HVR-C | HVR-D | HVR-E | HVR-F |
|-----------------------------------------------------------------------------------------------|----------------|---------|-------------|-------------|-------|-------|-------|-------|
| <b>EDP747</b><br>1 rare                                                                       | DPB1* 747:01e  | -       | <b>VFQG</b> | EEFA        | AAE   | ILEEK | M     | GGPM  |
| <b>EDP875</b><br>1 rare                                                                       | DPB1* 875:01Ne | -       | <b>FSRD</b> | <b>RSSR</b> | -     | -     | -     | -     |
| <i>Both sides of this epitope require RARE alleles, review results to confirm assignment.</i> |                |         |             |             |       |       |       |       |

OR

| EPITYPE                                                                                       | ALLELES        | P GROUP | HVR-A       | HVR-B       | HVR-C | HVR-D | HVR-E | HVR-F |
|-----------------------------------------------------------------------------------------------|----------------|---------|-------------|-------------|-------|-------|-------|-------|
| <b>EDP875</b><br>1 rare                                                                       | DPB1* 875:01Ne | -       | <b>FSRD</b> | <b>RSSR</b> | -     | -     | -     | -     |
| <b>EDP1122</b><br>1 rare                                                                      | DPB1* 1122:01e | -       | LFQG        | <b>EECA</b> | AAE   | ILEEK | M     | GGPM  |
| <i>Both sides of this epitope require RARE alleles, review results to confirm assignment.</i> |                |         |             |             |       |       |       |       |

OR

| EPITYPE                                                                                       | ALLELES        | P GROUP | HVR-A       | HVR-B       | HVR-C | HVR-D | HVR-E | HVR-F       |
|-----------------------------------------------------------------------------------------------|----------------|---------|-------------|-------------|-------|-------|-------|-------------|
| <b>EDP280</b><br>1 rare                                                                       | DPB1* 280:01e  | -       | LFQG        | EEFA        | AAE   | ILEEK | M     | <b>GAPM</b> |
| <b>EDP875</b><br>1 rare                                                                       | DPB1* 875:01Ne | -       | <b>FSRD</b> | <b>RSSR</b> | -     | -     | -     | -           |
| <i>Both sides of this epitope require RARE alleles, review results to confirm assignment.</i> |                |         |             |             |       |       |       |             |

OR

| EPITYPE | ALLELES | P GROUP | HVR-A | HVR-B | HVR-C | HVR-D | HVR-E | HVR-F |
|---------|---------|---------|-------|-------|-------|-------|-------|-------|
|---------|---------|---------|-------|-------|-------|-------|-------|-------|

|                                                                                               |                |   |             |             |     |       |   |             |
|-----------------------------------------------------------------------------------------------|----------------|---|-------------|-------------|-----|-------|---|-------------|
| <b>EDP230</b><br>1 rare                                                                       | DPB1* 230:01e  | - | LFQG        | EEFA        | AAE | ILEEK | M | <b>GWPM</b> |
| <b>EDP875</b><br>1 rare                                                                       | DPB1* 875:01Ne | - | <b>FSRD</b> | <b>RSSR</b> | -   | -     | - | -           |
| <i>Both sides of this epitope require RARE alleles, review results to confirm assignment.</i> |                |   |             |             |     |       |   |             |

OR

| EPITYPE                                                                                       | ALLELES        | P GROUP | HVR-A       | HVR-B       | HVR-C | HVR-D | HVR-E | HVR-F |
|-----------------------------------------------------------------------------------------------|----------------|---------|-------------|-------------|-------|-------|-------|-------|
| <b>EDP570</b><br>1 rare                                                                       | DPB1* 911:01Ne | -       | -           | -           | -     | -     | -     | -     |
| <b>EDP875</b><br>1 rare                                                                       | DPB1* 875:01Ne | -       | <b>FSRD</b> | <b>RSSR</b> | -     | -     | -     | -     |
| <i>Both sides of this epitope require RARE alleles, review results to confirm assignment.</i> |                |         |             |             |       |       |       |       |

OR

| EPITYPE                                                                                       | ALLELES        | P GROUP | HVR-A       | HVR-B       | HVR-C | HVR-D | HVR-E | HVR-F |
|-----------------------------------------------------------------------------------------------|----------------|---------|-------------|-------------|-------|-------|-------|-------|
| <b>EDP840</b><br>1 rare                                                                       | DPB1* 840:01e  | -       | <b>IFQG</b> | EEFA        | AAE   | ILEEK | M     | GGPM  |
| <b>EDP875</b><br>1 rare                                                                       | DPB1* 875:01Ne | -       | <b>FSRD</b> | <b>RSSR</b> | -     | -     | -     | -     |
| <i>Both sides of this epitope require RARE alleles, review results to confirm assignment.</i> |                |         |             |             |       |       |       |       |

OR

| EPITYPE                                                                                       | ALLELES       | P GROUP | HVR-A | HVR-B       | HVR-C | HVR-D | HVR-E | HVR-F |
|-----------------------------------------------------------------------------------------------|---------------|---------|-------|-------------|-------|-------|-------|-------|
| <b>EDP375</b><br>1 rare                                                                       | DPB1* 375:01e | -       | LFQG  | <b>QEFA</b> | AAE   | ILEEK | M     | GGPM  |
| <b>EDP686</b><br>1 rare                                                                       | DPB1* 686:01e | -       | LFQG  | <b>EGFA</b> | AAE   | ILEEK | M     | GGPM  |
| <i>Both sides of this epitope require RARE alleles, review results to confirm assignment.</i> |               |         |       |             |       |       |       |       |

OR

| EPITYPE | ALLELES | P GROUP | HVR-A | HVR-B | HVR-C | HVR-D | HVR-E | HVR-F |
|---------|---------|---------|-------|-------|-------|-------|-------|-------|
|---------|---------|---------|-------|-------|-------|-------|-------|-------|

|                                                                                               |               |   |      |      |     |       |   |      |
|-----------------------------------------------------------------------------------------------|---------------|---|------|------|-----|-------|---|------|
| <b>EDP176</b><br>1 rare                                                                       | DPB1* 176:01e | - | LFQG | EEFA | AAE | ILKEK | M | GGPM |
| <b>EDP375</b><br>1 rare                                                                       | DPB1* 375:01e | - | LFQG | QEFA | AAE | ILEEK | M | GGPM |
| <i>Both sides of this epitype require RARE alleles, review results to confirm assignment.</i> |               |   |      |      |     |       |   |      |

OR

| EPITYPE                                                                                       | ALLELES       | P GROUP | HVR-A | HVR-B | HVR-C | HVR-D | HVR-E | HVR-F |
|-----------------------------------------------------------------------------------------------|---------------|---------|-------|-------|-------|-------|-------|-------|
| <b>EDP375</b><br>1 rare                                                                       | DPB1* 375:01e | -       | LFQG  | QEFA  | AAE   | ILEEK | M     | GGPM  |
| <b>EDP456</b><br>1 rare                                                                       | DPB1* 456:01e | -       | LFQG  | EEFA  | AAE   | ILEVK | M     | GGPM  |
| <i>Both sides of this epitype require RARE alleles, review results to confirm assignment.</i> |               |         |       |       |       |       |       |       |

OR

| EPITYPE                                                                                       | ALLELES        | P GROUP | HVR-A | HVR-B | HVR-C | HVR-D | HVR-E | HVR-F |
|-----------------------------------------------------------------------------------------------|----------------|---------|-------|-------|-------|-------|-------|-------|
| <b>EDP375</b><br>1 rare                                                                       | DPB1* 375:01e  | -       | LFQG  | QEFA  | AAE   | ILEEK | M     | GGPM  |
| <b>EDP1097</b><br>1 rare                                                                      | DPB1* 1097:01e | -       | LFLG  | EEFA  | AAE   | ILEEK | M     | GGPM  |
| <i>Both sides of this epitype require RARE alleles, review results to confirm assignment.</i> |                |         |       |       |       |       |       |       |

OR

| EPITYPE                                                                                       | ALLELES       | P GROUP | HVR-A | HVR-B | HVR-C | HVR-D | HVR-E | HVR-F |
|-----------------------------------------------------------------------------------------------|---------------|---------|-------|-------|-------|-------|-------|-------|
| <b>EDP303</b><br>1 rare                                                                       | DPB1* 303:01e | -       | LFQG  | EEFA  | AAE   | ILEER | M     | GGPM  |
| <b>EDP375</b><br>1 rare                                                                       | DPB1* 375:01e | -       | LFQG  | QEFA  | AAE   | ILEEK | M     | GGPM  |
| <i>Both sides of this epitype require RARE alleles, review results to confirm assignment.</i> |               |         |       |       |       |       |       |       |

OR

| EPITYPE | ALLELES | P GROUP | HVR-A | HVR-B | HVR-C | HVR-D | HVR-E | HVR-F |
|---------|---------|---------|-------|-------|-------|-------|-------|-------|
|---------|---------|---------|-------|-------|-------|-------|-------|-------|

|                                                                                               |               |   |      |      |     |       |   |      |
|-----------------------------------------------------------------------------------------------|---------------|---|------|------|-----|-------|---|------|
| <b>EDP375</b><br>1 rare                                                                       | DPB1* 375:01e | - | LFQG | QEFA | AAE | ILEEK | M | GGPM |
| <b>EDP753</b><br>1 rare                                                                       | DPB1* 753:01e | - | FFQG | EEFA | AAE | ILEEK | M | GGPM |
| <i>Both sides of this epitype require RARE alleles, review results to confirm assignment.</i> |               |   |      |      |     |       |   |      |

OR

| EPITYPE                                                                                       | ALLELES        | P GROUP | HVR-A | HVR-B | HVR-C | HVR-D | HVR-E | HVR-F |
|-----------------------------------------------------------------------------------------------|----------------|---------|-------|-------|-------|-------|-------|-------|
| <b>EDP375</b><br>1 rare                                                                       | DPB1* 375:01e  | -       | LFQG  | QEFA  | AAE   | ILEEK | M     | GGPM  |
| <b>EDP934</b><br>1 rare                                                                       | DPB1* 934:01Qe | -       | LFQG  | EF.A  | AAE   | ILEEK | M     | GGPM  |
| <i>Both sides of this epitype require RARE alleles, review results to confirm assignment.</i> |                |         |       |       |       |       |       |       |

OR

| EPITYPE                                                                                       | ALLELES        | P GROUP | HVR-A | HVR-B | HVR-C | HVR-D | HVR-E | HVR-F |
|-----------------------------------------------------------------------------------------------|----------------|---------|-------|-------|-------|-------|-------|-------|
| <b>EDP375</b><br>1 rare                                                                       | DPB1* 375:01e  | -       | LFQG  | QEFA  | AAE   | ILEEK | M     | GGPM  |
| <b>EDP874</b><br>1 rare                                                                       | DPB1* 874:01Ne | -       | LFQG  | EEFA  | AAE   | ILEEK | C     | -     |
| <i>Both sides of this epitype require RARE alleles, review results to confirm assignment.</i> |                |         |       |       |       |       |       |       |

OR

| EPITYPE                                                                                       | ALLELES       | P GROUP | HVR-A | HVR-B | HVR-C | HVR-D | HVR-E | HVR-F |
|-----------------------------------------------------------------------------------------------|---------------|---------|-------|-------|-------|-------|-------|-------|
| <b>EDP254</b><br>1 rare                                                                       | DPB1* 254:01e | -       | LFQG  | EEFA  | AVE   | ILEEK | M     | GGPM  |
| <b>EDP375</b><br>1 rare                                                                       | DPB1* 375:01e | -       | LFQG  | QEFA  | AAE   | ILEEK | M     | GGPM  |
| <i>Both sides of this epitype require RARE alleles, review results to confirm assignment.</i> |               |         |       |       |       |       |       |       |

OR

| EPITYPE | ALLELES | P GROUP | HVR-A | HVR-B | HVR-C | HVR-D | HVR-E | HVR-F |
|---------|---------|---------|-------|-------|-------|-------|-------|-------|
|---------|---------|---------|-------|-------|-------|-------|-------|-------|



|                                                                                               |               |   |      |      |     |       |   |      |
|-----------------------------------------------------------------------------------------------|---------------|---|------|------|-----|-------|---|------|
| <b>EDP375</b><br>1 rare                                                                       | DPB1* 375:01e | - | LFQG | QEFA | AAE | ILEEK | M | GGPM |
| <b>EDP454</b><br>1 rare                                                                       | DPB1* 454:01e | - | LFQG | EEFA | AAE | ILEEK | M | GEPM |
| <i>Both sides of this epitope require RARE alleles, review results to confirm assignment.</i> |               |   |      |      |     |       |   |      |

OR

| EPITYPE                                                                                       | ALLELES        | P GROUP | HVR-A | HVR-B | HVR-C | HVR-D | HVR-E | HVR-F |
|-----------------------------------------------------------------------------------------------|----------------|---------|-------|-------|-------|-------|-------|-------|
| <b>EDP375</b><br>1 rare                                                                       | DPB1* 375:01e  | -       | LFQG  | QEFA  | AAE   | ILEEK | M     | GGPM  |
| <b>EDP1046</b><br>1 rare                                                                      | DPB1* 1046:01e | -       | LFQG  | EEIA  | AAE   | ILEEK | M     | GGPM  |
| <i>Both sides of this epitope require RARE alleles, review results to confirm assignment.</i> |                |         |       |       |       |       |       |       |

OR

| EPITYPE                                                                                       | ALLELES       | P GROUP | HVR-A | HVR-B | HVR-C | HVR-D | HVR-E | HVR-F |
|-----------------------------------------------------------------------------------------------|---------------|---------|-------|-------|-------|-------|-------|-------|
| <b>EDP375</b><br>1 rare                                                                       | DPB1* 375:01e | -       | LFQG  | QEFA  | AAE   | ILEEK | M     | GGPM  |
| <b>EDP921</b><br>1 rare                                                                       | DPB1* 921:01e | -       | LFQG  | GEFA  | AAE   | ILEEK | M     | GGPM  |
| <i>Both sides of this epitope require RARE alleles, review results to confirm assignment.</i> |               |         |       |       |       |       |       |       |

OR

| EPITYPE                                                                                       | ALLELES        | P GROUP | HVR-A | HVR-B | HVR-C | HVR-D | HVR-E | HVR-F |
|-----------------------------------------------------------------------------------------------|----------------|---------|-------|-------|-------|-------|-------|-------|
| <b>EDP375</b><br>1 rare                                                                       | DPB1* 375:01e  | -       | LFQG  | QEFA  | AAE   | ILEEK | M     | GGPM  |
| <b>EDP871</b><br>1 rare                                                                       | DPB1* 871:01Ne | -       | LFQG  | EEFA  | AAE   | HPGGE | D     | GRAH  |
| <i>Both sides of this epitope require RARE alleles, review results to confirm assignment.</i> |                |         |       |       |       |       |       |       |

OR

| EPITYPE | ALLELES | P GROUP | HVR-A | HVR-B | HVR-C | HVR-D | HVR-E | HVR-F |
|---------|---------|---------|-------|-------|-------|-------|-------|-------|
|---------|---------|---------|-------|-------|-------|-------|-------|-------|

|                                                                                               |               |   |      |      |     |       |   |      |
|-----------------------------------------------------------------------------------------------|---------------|---|------|------|-----|-------|---|------|
| <b>EDP375</b><br>1 rare                                                                       | DPB1* 375:01e | - | LFQG | QEFA | AAE | ILEEK | M | GGPM |
| <b>EDP399</b><br>1 rare                                                                       | DPB1* 399:01e | - | LFQG | EEFA | AAE | IVEEK | M | GGPM |
| <i>Both sides of this epitype require RARE alleles, review results to confirm assignment.</i> |               |   |      |      |     |       |   |      |

OR

| EPITYPE                                                                                       | ALLELES       | P GROUP | HVR-A | HVR-B | HVR-C | HVR-D | HVR-E | HVR-F |
|-----------------------------------------------------------------------------------------------|---------------|---------|-------|-------|-------|-------|-------|-------|
| <b>EDP319</b><br>1 rare                                                                       | DPB1* 319:01e | -       | LFQG  | EEFA  | AAE   | IQEEK | M     | GGPM  |
| <b>EDP375</b><br>1 rare                                                                       | DPB1* 375:01e | -       | LFQG  | QEFA  | AAE   | ILEEK | M     | GGPM  |
| <i>Both sides of this epitype require RARE alleles, review results to confirm assignment.</i> |               |         |       |       |       |       |       |       |

OR

| EPITYPE                                                                                       | ALLELES       | P GROUP | HVR-A | HVR-B | HVR-C | HVR-D | HVR-E | HVR-F |
|-----------------------------------------------------------------------------------------------|---------------|---------|-------|-------|-------|-------|-------|-------|
| <b>EDP179</b><br>1 rare                                                                       | DPB1* 179:01e | -       | LFQG  | EEFA  | AAE   | LLEER | M     | GGPM  |
| <b>EDP375</b><br>1 rare                                                                       | DPB1* 375:01e | -       | LFQG  | QEFA  | AAE   | ILEEK | M     | GGPM  |
| <i>Both sides of this epitype require RARE alleles, review results to confirm assignment.</i> |               |         |       |       |       |       |       |       |

OR

| EPITYPE                                                                                       | ALLELES       | P GROUP | HVR-A | HVR-B | HVR-C | HVR-D | HVR-E | HVR-F |
|-----------------------------------------------------------------------------------------------|---------------|---------|-------|-------|-------|-------|-------|-------|
| <b>EDP375</b><br>1 rare                                                                       | DPB1* 375:01e | -       | LFQG  | QEFA  | AAE   | ILEEK | M     | GGPM  |
| <b>EDP679</b><br>1 rare                                                                       | DPB1* 679:01e | -       | PFQG  | EEFA  | AAE   | ILEEK | M     | GGPM  |
| <i>Both sides of this epitype require RARE alleles, review results to confirm assignment.</i> |               |         |       |       |       |       |       |       |

OR

| EPITYPE | ALLELES | P GROUP | HVR-A | HVR-B | HVR-C | HVR-D | HVR-E | HVR-F |
|---------|---------|---------|-------|-------|-------|-------|-------|-------|
|---------|---------|---------|-------|-------|-------|-------|-------|-------|

|                                                                                               |               |   |      |      |     |       |   |      |
|-----------------------------------------------------------------------------------------------|---------------|---|------|------|-----|-------|---|------|
| <b>EDP375</b><br>1 rare                                                                       | DPB1* 375:01e | - | LFQG | QEFA | AAE | ILEEK | M | GGPM |
| <b>EDP592</b><br>1 rare                                                                       | DPB1* 592:01e | - | LFQG | EEFA | AAE | ILEEK | M | GGPR |
| <i>Both sides of this epitype require RARE alleles, review results to confirm assignment.</i> |               |   |      |      |     |       |   |      |

OR

| EPITYPE                                                                                       | ALLELES       | P GROUP | HVR-A | HVR-B | HVR-C | HVR-D | HVR-E | HVR-F |
|-----------------------------------------------------------------------------------------------|---------------|---------|-------|-------|-------|-------|-------|-------|
| <b>EDP375</b><br>1 rare                                                                       | DPB1* 375:01e | -       | LFQG  | QEFA  | AAE   | ILEEK | M     | GGPM  |
| <b>EDP972</b><br>1 rare                                                                       | DPB1* 972:01e | -       | LFQG  | GEFV  | AAE   | ILEEK | M     | GGPM  |
| <i>Both sides of this epitype require RARE alleles, review results to confirm assignment.</i> |               |         |       |       |       |       |       |       |

OR

| EPITYPE                                                                                       | ALLELES       | P GROUP | HVR-A | HVR-B | HVR-C | HVR-D | HVR-E | HVR-F |
|-----------------------------------------------------------------------------------------------|---------------|---------|-------|-------|-------|-------|-------|-------|
| <b>EDP375</b><br>1 rare                                                                       | DPB1* 375:01e | -       | LFQG  | QEFA  | AAE   | ILEEK | M     | GGPM  |
| <b>EDP642</b><br>1 rare                                                                       | DPB1* 642:01e | -       | LFQG  | EEFA  | DAE   | ILEEK | M     | GGPM  |
| <i>Both sides of this epitype require RARE alleles, review results to confirm assignment.</i> |               |         |       |       |       |       |       |       |

OR

| EPITYPE                                                                                       | ALLELES        | P GROUP | HVR-A | HVR-B | HVR-C | HVR-D | HVR-E | HVR-F |
|-----------------------------------------------------------------------------------------------|----------------|---------|-------|-------|-------|-------|-------|-------|
| <b>EDP375</b><br>1 rare                                                                       | DPB1* 375:01e  | -       | LFQG  | QEFA  | AAE   | ILEEK | M     | GGPM  |
| <b>EDP1081</b><br>1 rare                                                                      | DPB1* 1081:01e | -       | LFQG  | EEFA  | AAE   | VLEEK | M     | GGPM  |
| <i>Both sides of this epitype require RARE alleles, review results to confirm assignment.</i> |                |         |       |       |       |       |       |       |

OR

| EPITYPE | ALLELES | P GROUP | HVR-A | HVR-B | HVR-C | HVR-D | HVR-E | HVR-F |
|---------|---------|---------|-------|-------|-------|-------|-------|-------|
|---------|---------|---------|-------|-------|-------|-------|-------|-------|

|                                                                                               |                 |   |      |      |     |       |   |      |
|-----------------------------------------------------------------------------------------------|-----------------|---|------|------|-----|-------|---|------|
| <b>EDP375</b><br>1 rare                                                                       | DPB1* 375:01e   | - | LFQG | QEFA | AAE | ILEEK | M | GGPM |
| <b>EDP1135</b><br>1 rare                                                                      | DPB1* 1135:01Ne | - | LFQG | EEFA | AAE | ILGGE | D | GRAH |
| <i>Both sides of this epitype require RARE alleles, review results to confirm assignment.</i> |                 |   |      |      |     |       |   |      |

OR

| EPITYPE                                                                                       | ALLELES       | P GROUP | HVR-A | HVR-B | HVR-C | HVR-D | HVR-E | HVR-F |
|-----------------------------------------------------------------------------------------------|---------------|---------|-------|-------|-------|-------|-------|-------|
| <b>EDP375</b><br>1 rare                                                                       | DPB1* 375:01e | -       | LFQG  | QEFA  | AAE   | ILEEK | M     | GGPM  |
| <b>EDP687</b><br>1 rare                                                                       | DPB1* 687:01e | -       | LFQL  | EEFA  | AAE   | ILEEK | M     | GGPM  |
| <i>Both sides of this epitype require RARE alleles, review results to confirm assignment.</i> |               |         |       |       |       |       |       |       |

OR

| EPITYPE                                                                                       | ALLELES       | P GROUP | HVR-A | HVR-B | HVR-C | HVR-D | HVR-E | HVR-F |
|-----------------------------------------------------------------------------------------------|---------------|---------|-------|-------|-------|-------|-------|-------|
| <b>EDP375</b><br>1 rare                                                                       | DPB1* 375:01e | -       | LFQG  | QEFA  | AAE   | ILEEK | M     | GGPM  |
| <b>EDP427</b><br>1 rare                                                                       | DPB1* 427:01e | -       | LFQG  | EEFA  | ATE   | ILEEK | M     | GGPM  |
| <i>Both sides of this epitype require RARE alleles, review results to confirm assignment.</i> |               |         |       |       |       |       |       |       |

OR

| EPITYPE                                                                                       | ALLELES        | P GROUP | HVR-A | HVR-B | HVR-C | HVR-D | HVR-E | HVR-F |
|-----------------------------------------------------------------------------------------------|----------------|---------|-------|-------|-------|-------|-------|-------|
| <b>EDP375</b><br>1 rare                                                                       | DPB1* 375:01e  | -       | LFQG  | QEFA  | AAE   | ILEEK | M     | GGPM  |
| <b>EDP867</b><br>1 rare                                                                       | DPB1* 867:01Ne | -       | LFQG  | EEFA  | CCG   | HPGGE | D     | GRAH  |
| <i>Both sides of this epitype require RARE alleles, review results to confirm assignment.</i> |                |         |       |       |       |       |       |       |

OR

| EPITYPE | ALLELES | P GROUP | HVR-A | HVR-B | HVR-C | HVR-D | HVR-E | HVR-F |
|---------|---------|---------|-------|-------|-------|-------|-------|-------|
|---------|---------|---------|-------|-------|-------|-------|-------|-------|

|                                                                                               |               |   |      |      |     |       |   |      |
|-----------------------------------------------------------------------------------------------|---------------|---|------|------|-----|-------|---|------|
| <b>EDP177</b><br>1 rare                                                                       | DPB1* 177:01e | - | LFQG | EEFA | AAE | ILEEK | M | SGPM |
| <b>EDP375</b><br>1 rare                                                                       | DPB1* 375:01e | - | LFQG | QEFA | AAE | ILEEK | M | GGPM |
| <i>Both sides of this epitype require RARE alleles, review results to confirm assignment.</i> |               |   |      |      |     |       |   |      |

OR

| EPITYPE                                                                                       | ALLELES       | P GROUP | HVR-A | HVR-B | HVR-C | HVR-D | HVR-E | HVR-F |
|-----------------------------------------------------------------------------------------------|---------------|---------|-------|-------|-------|-------|-------|-------|
| <b>EDP375</b><br>1 rare                                                                       | DPB1* 375:01e | -       | LFQG  | QEFA  | AAE   | ILEEK | M     | GGPM  |
| <b>EDP747</b><br>1 rare                                                                       | DPB1* 747:01e | -       | VFQG  | EEFA  | AAE   | ILEEK | M     | GGPM  |
| <i>Both sides of this epitype require RARE alleles, review results to confirm assignment.</i> |               |         |       |       |       |       |       |       |

OR

| EPITYPE                                                                                       | ALLELES        | P GROUP | HVR-A | HVR-B | HVR-C | HVR-D | HVR-E | HVR-F |
|-----------------------------------------------------------------------------------------------|----------------|---------|-------|-------|-------|-------|-------|-------|
| <b>EDP375</b><br>1 rare                                                                       | DPB1* 375:01e  | -       | LFQG  | QEFA  | AAE   | ILEEK | M     | GGPM  |
| <b>EDP1122</b><br>1 rare                                                                      | DPB1* 1122:01e | -       | LFQG  | EECA  | AAE   | ILEEK | M     | GGPM  |
| <i>Both sides of this epitype require RARE alleles, review results to confirm assignment.</i> |                |         |       |       |       |       |       |       |

OR

| EPITYPE                                                                                       | ALLELES       | P GROUP | HVR-A | HVR-B | HVR-C | HVR-D | HVR-E | HVR-F |
|-----------------------------------------------------------------------------------------------|---------------|---------|-------|-------|-------|-------|-------|-------|
| <b>EDP280</b><br>1 rare                                                                       | DPB1* 280:01e | -       | LFQG  | EEFA  | AAE   | ILEEK | M     | GAPM  |
| <b>EDP375</b><br>1 rare                                                                       | DPB1* 375:01e | -       | LFQG  | QEFA  | AAE   | ILEEK | M     | GGPM  |
| <i>Both sides of this epitype require RARE alleles, review results to confirm assignment.</i> |               |         |       |       |       |       |       |       |

OR

| EPITYPE | ALLELES | P GROUP | HVR-A | HVR-B | HVR-C | HVR-D | HVR-E | HVR-F |
|---------|---------|---------|-------|-------|-------|-------|-------|-------|
|---------|---------|---------|-------|-------|-------|-------|-------|-------|

|                                                                                               |               |   |      |      |     |       |   |      |
|-----------------------------------------------------------------------------------------------|---------------|---|------|------|-----|-------|---|------|
| <b>EDP230</b><br>1 rare                                                                       | DPB1* 230:01e | - | LFQG | EEFA | AAE | ILEEK | M | GWPM |
| <b>EDP375</b><br>1 rare                                                                       | DPB1* 375:01e | - | LFQG | QEFA | AAE | ILEEK | M | GGPM |
| <i>Both sides of this epitype require RARE alleles, review results to confirm assignment.</i> |               |   |      |      |     |       |   |      |

OR

| EPITYPE                                                                                       | ALLELES        | P GROUP | HVR-A | HVR-B | HVR-C | HVR-D | HVR-E | HVR-F |
|-----------------------------------------------------------------------------------------------|----------------|---------|-------|-------|-------|-------|-------|-------|
| <b>EDP375</b><br>1 rare                                                                       | DPB1* 375:01e  | -       | LFQG  | QEFA  | AAE   | ILEEK | M     | GGPM  |
| <b>EDP570</b><br>1 rare                                                                       | DPB1* 911:01Ne | -       | -     | -     | -     | -     | -     | -     |
| <i>Both sides of this epitype require RARE alleles, review results to confirm assignment.</i> |                |         |       |       |       |       |       |       |

OR

| EPITYPE                                                                                       | ALLELES       | P GROUP | HVR-A | HVR-B | HVR-C | HVR-D | HVR-E | HVR-F |
|-----------------------------------------------------------------------------------------------|---------------|---------|-------|-------|-------|-------|-------|-------|
| <b>EDP375</b><br>1 rare                                                                       | DPB1* 375:01e | -       | LFQG  | QEFA  | AAE   | ILEEK | M     | GGPM  |
| <b>EDP840</b><br>1 rare                                                                       | DPB1* 840:01e | -       | IFQG  | EEFA  | AAE   | ILEEK | M     | GGPM  |
| <i>Both sides of this epitype require RARE alleles, review results to confirm assignment.</i> |               |         |       |       |       |       |       |       |

OR

| EPITYPE                                                                                       | ALLELES       | P GROUP | HVR-A | HVR-B | HVR-C | HVR-D | HVR-E | HVR-F |
|-----------------------------------------------------------------------------------------------|---------------|---------|-------|-------|-------|-------|-------|-------|
| <b>EDP176</b><br>1 rare                                                                       | DPB1* 176:01e | -       | LFQG  | EEFA  | AAE   | ILKEK | M     | GGPM  |
| <b>EDP686</b><br>1 rare                                                                       | DPB1* 686:01e | -       | LFQG  | EGFA  | AAE   | ILEEK | M     | GGPM  |
| <i>Both sides of this epitype require RARE alleles, review results to confirm assignment.</i> |               |         |       |       |       |       |       |       |

OR

| EPITYPE | ALLELES | P GROUP | HVR-A | HVR-B | HVR-C | HVR-D | HVR-E | HVR-F |
|---------|---------|---------|-------|-------|-------|-------|-------|-------|
|---------|---------|---------|-------|-------|-------|-------|-------|-------|

|                                                                                               |               |   |      |      |     |       |   |      |
|-----------------------------------------------------------------------------------------------|---------------|---|------|------|-----|-------|---|------|
| <b>EDP456</b><br>1 rare                                                                       | DPB1* 456:01e | - | LFQG | EEFA | AAE | ILEVK | M | GGPM |
| <b>EDP686</b><br>1 rare                                                                       | DPB1* 686:01e | - | LFQG | EGFA | AAE | ILEEK | M | GGPM |
| <i>Both sides of this epitype require RARE alleles, review results to confirm assignment.</i> |               |   |      |      |     |       |   |      |

OR

| EPITYPE                                                                                       | ALLELES        | P GROUP | HVR-A | HVR-B | HVR-C | HVR-D | HVR-E | HVR-F |
|-----------------------------------------------------------------------------------------------|----------------|---------|-------|-------|-------|-------|-------|-------|
| <b>EDP686</b><br>1 rare                                                                       | DPB1* 686:01e  | -       | LFQG  | EGFA  | AAE   | ILEEK | M     | GGPM  |
| <b>EDP1097</b><br>1 rare                                                                      | DPB1* 1097:01e | -       | LFLG  | EEFA  | AAE   | ILEEK | M     | GGPM  |
| <i>Both sides of this epitype require RARE alleles, review results to confirm assignment.</i> |                |         |       |       |       |       |       |       |

OR

| EPITYPE                                                                                       | ALLELES       | P GROUP | HVR-A | HVR-B | HVR-C | HVR-D | HVR-E | HVR-F |
|-----------------------------------------------------------------------------------------------|---------------|---------|-------|-------|-------|-------|-------|-------|
| <b>EDP303</b><br>1 rare                                                                       | DPB1* 303:01e | -       | LFQG  | EEFA  | AAE   | ILEER | M     | GGPM  |
| <b>EDP686</b><br>1 rare                                                                       | DPB1* 686:01e | -       | LFQG  | EGFA  | AAE   | ILEEK | M     | GGPM  |
| <i>Both sides of this epitype require RARE alleles, review results to confirm assignment.</i> |               |         |       |       |       |       |       |       |

OR

| EPITYPE                                                                                       | ALLELES       | P GROUP | HVR-A | HVR-B | HVR-C | HVR-D | HVR-E | HVR-F |
|-----------------------------------------------------------------------------------------------|---------------|---------|-------|-------|-------|-------|-------|-------|
| <b>EDP686</b><br>1 rare                                                                       | DPB1* 686:01e | -       | LFQG  | EGFA  | AAE   | ILEEK | M     | GGPM  |
| <b>EDP753</b><br>1 rare                                                                       | DPB1* 753:01e | -       | FFQG  | EEFA  | AAE   | ILEEK | M     | GGPM  |
| <i>Both sides of this epitype require RARE alleles, review results to confirm assignment.</i> |               |         |       |       |       |       |       |       |

OR

| EPITYPE | ALLELES | P GROUP | HVR-A | HVR-B | HVR-C | HVR-D | HVR-E | HVR-F |
|---------|---------|---------|-------|-------|-------|-------|-------|-------|
|---------|---------|---------|-------|-------|-------|-------|-------|-------|

|                                                                                               |                |   |      |      |     |       |   |      |
|-----------------------------------------------------------------------------------------------|----------------|---|------|------|-----|-------|---|------|
| <b>EDP686</b><br>1 rare                                                                       | DPB1* 686:01e  | - | LFQG | EGFA | AAE | ILEEK | M | GGPM |
| <b>EDP934</b><br>1 rare                                                                       | DPB1* 934:01Qe | - | LFQG | EFA  | AAE | ILEEK | M | GGPM |
| <i>Both sides of this epitope require RARE alleles, review results to confirm assignment.</i> |                |   |      |      |     |       |   |      |

OR

| EPITYPE                                                                                       | ALLELES        | P GROUP | HVR-A | HVR-B | HVR-C | HVR-D | HVR-E | HVR-F |
|-----------------------------------------------------------------------------------------------|----------------|---------|-------|-------|-------|-------|-------|-------|
| <b>EDP686</b><br>1 rare                                                                       | DPB1* 686:01e  | -       | LFQG  | EGFA  | AAE   | ILEEK | M     | GGPM  |
| <b>EDP874</b><br>1 rare                                                                       | DPB1* 874:01Ne | -       | LFQG  | EEFA  | AAE   | ILEEK | C     | -     |
| <i>Both sides of this epitope require RARE alleles, review results to confirm assignment.</i> |                |         |       |       |       |       |       |       |

OR

| EPITYPE                                                                                       | ALLELES       | P GROUP | HVR-A | HVR-B | HVR-C | HVR-D | HVR-E | HVR-F |
|-----------------------------------------------------------------------------------------------|---------------|---------|-------|-------|-------|-------|-------|-------|
| <b>EDP254</b><br>1 rare                                                                       | DPB1* 254:01e | -       | LFQG  | EEFA  | AVE   | ILEEK | M     | GGPM  |
| <b>EDP686</b><br>1 rare                                                                       | DPB1* 686:01e | -       | LFQG  | EGFA  | AAE   | ILEEK | M     | GGPM  |
| <i>Both sides of this epitope require RARE alleles, review results to confirm assignment.</i> |               |         |       |       |       |       |       |       |

OR

| EPITYPE                                                                                       | ALLELES       | P GROUP | HVR-A | HVR-B | HVR-C | HVR-D | HVR-E | HVR-F |
|-----------------------------------------------------------------------------------------------|---------------|---------|-------|-------|-------|-------|-------|-------|
| <b>EDP454</b><br>1 rare                                                                       | DPB1* 454:01e | -       | LFQG  | EEFA  | AAE   | ILEEK | M     | GEPM  |
| <b>EDP686</b><br>1 rare                                                                       | DPB1* 686:01e | -       | LFQG  | EGFA  | AAE   | ILEEK | M     | GGPM  |
| <i>Both sides of this epitope require RARE alleles, review results to confirm assignment.</i> |               |         |       |       |       |       |       |       |

OR

| EPITYPE | ALLELES | P GROUP | HVR-A | HVR-B | HVR-C | HVR-D | HVR-E | HVR-F |
|---------|---------|---------|-------|-------|-------|-------|-------|-------|
|---------|---------|---------|-------|-------|-------|-------|-------|-------|



|                                                                                               |                |   |      |      |     |       |   |      |
|-----------------------------------------------------------------------------------------------|----------------|---|------|------|-----|-------|---|------|
| <b>EDP686</b><br>1 rare                                                                       | DPB1* 686:01e  | - | LFQG | EGFA | AAE | ILEEK | M | GGPM |
| <b>EDP1046</b><br>1 rare                                                                      | DPB1* 1046:01e | - | LFQG | EEIA | AAE | ILEEK | M | GGPM |
| <i>Both sides of this epitope require RARE alleles, review results to confirm assignment.</i> |                |   |      |      |     |       |   |      |

OR

| EPITYPE                                                                                       | ALLELES       | P GROUP | HVR-A | HVR-B | HVR-C | HVR-D | HVR-E | HVR-F |
|-----------------------------------------------------------------------------------------------|---------------|---------|-------|-------|-------|-------|-------|-------|
| <b>EDP686</b><br>1 rare                                                                       | DPB1* 686:01e | -       | LFQG  | EGFA  | AAE   | ILEEK | M     | GGPM  |
| <b>EDP921</b><br>1 rare                                                                       | DPB1* 921:01e | -       | LFQG  | GEFA  | AAE   | ILEEK | M     | GGPM  |
| <i>Both sides of this epitope require RARE alleles, review results to confirm assignment.</i> |               |         |       |       |       |       |       |       |

OR

| EPITYPE                                                                                       | ALLELES        | P GROUP | HVR-A | HVR-B | HVR-C | HVR-D | HVR-E | HVR-F |
|-----------------------------------------------------------------------------------------------|----------------|---------|-------|-------|-------|-------|-------|-------|
| <b>EDP686</b><br>1 rare                                                                       | DPB1* 686:01e  | -       | LFQG  | EGFA  | AAE   | ILEEK | M     | GGPM  |
| <b>EDP871</b><br>1 rare                                                                       | DPB1* 871:01Ne | -       | LFQG  | EEFA  | AAE   | HPGGE | D     | GRAH  |
| <i>Both sides of this epitope require RARE alleles, review results to confirm assignment.</i> |                |         |       |       |       |       |       |       |

OR

| EPITYPE                                                                                       | ALLELES       | P GROUP | HVR-A | HVR-B | HVR-C | HVR-D | HVR-E | HVR-F |
|-----------------------------------------------------------------------------------------------|---------------|---------|-------|-------|-------|-------|-------|-------|
| <b>EDP399</b><br>1 rare                                                                       | DPB1* 399:01e | -       | LFQG  | EEFA  | AAE   | IVEEK | M     | GGPM  |
| <b>EDP686</b><br>1 rare                                                                       | DPB1* 686:01e | -       | LFQG  | EGFA  | AAE   | ILEEK | M     | GGPM  |
| <i>Both sides of this epitope require RARE alleles, review results to confirm assignment.</i> |               |         |       |       |       |       |       |       |

OR

| EPITYPE | ALLELES | P GROUP | HVR-A | HVR-B | HVR-C | HVR-D | HVR-E | HVR-F |
|---------|---------|---------|-------|-------|-------|-------|-------|-------|
|---------|---------|---------|-------|-------|-------|-------|-------|-------|

|                                                                                               |               |   |      |      |     |       |   |      |
|-----------------------------------------------------------------------------------------------|---------------|---|------|------|-----|-------|---|------|
| <b>EDP319</b><br>1 rare                                                                       | DPB1* 319:01e | - | LFQG | EEFA | AAE | IQEEK | M | GGPM |
| <b>EDP686</b><br>1 rare                                                                       | DPB1* 686:01e | - | LFQG | EGFA | AAE | ILEEK | M | GGPM |
| <i>Both sides of this epitype require RARE alleles, review results to confirm assignment.</i> |               |   |      |      |     |       |   |      |

OR

| EPITYPE                                                                                       | ALLELES       | P GROUP | HVR-A | HVR-B | HVR-C | HVR-D | HVR-E | HVR-F |
|-----------------------------------------------------------------------------------------------|---------------|---------|-------|-------|-------|-------|-------|-------|
| <b>EDP179</b><br>1 rare                                                                       | DPB1* 179:01e | -       | LFQG  | EEFA  | AAE   | LLEER | M     | GGPM  |
| <b>EDP686</b><br>1 rare                                                                       | DPB1* 686:01e | -       | LFQG  | EGFA  | AAE   | ILEEK | M     | GGPM  |
| <i>Both sides of this epitype require RARE alleles, review results to confirm assignment.</i> |               |         |       |       |       |       |       |       |

OR

| EPITYPE                                                                                       | ALLELES       | P GROUP | HVR-A | HVR-B | HVR-C | HVR-D | HVR-E | HVR-F |
|-----------------------------------------------------------------------------------------------|---------------|---------|-------|-------|-------|-------|-------|-------|
| <b>EDP679</b><br>1 rare                                                                       | DPB1* 679:01e | -       | PFQG  | EEFA  | AAE   | ILEEK | M     | GGPM  |
| <b>EDP686</b><br>1 rare                                                                       | DPB1* 686:01e | -       | LFQG  | EGFA  | AAE   | ILEEK | M     | GGPM  |
| <i>Both sides of this epitype require RARE alleles, review results to confirm assignment.</i> |               |         |       |       |       |       |       |       |

OR

| EPITYPE                                                                                       | ALLELES       | P GROUP | HVR-A | HVR-B | HVR-C | HVR-D | HVR-E | HVR-F |
|-----------------------------------------------------------------------------------------------|---------------|---------|-------|-------|-------|-------|-------|-------|
| <b>EDP592</b><br>1 rare                                                                       | DPB1* 592:01e | -       | LFQG  | EEFA  | AAE   | ILEEK | M     | GGPR  |
| <b>EDP686</b><br>1 rare                                                                       | DPB1* 686:01e | -       | LFQG  | EGFA  | AAE   | ILEEK | M     | GGPM  |
| <i>Both sides of this epitype require RARE alleles, review results to confirm assignment.</i> |               |         |       |       |       |       |       |       |

OR

| EPITYPE | ALLELES | P GROUP | HVR-A | HVR-B | HVR-C | HVR-D | HVR-E | HVR-F |
|---------|---------|---------|-------|-------|-------|-------|-------|-------|
|---------|---------|---------|-------|-------|-------|-------|-------|-------|

|                                                                                               |               |   |      |      |     |       |   |      |
|-----------------------------------------------------------------------------------------------|---------------|---|------|------|-----|-------|---|------|
| <b>EDP686</b><br>1 rare                                                                       | DPB1* 686:01e | - | LFQG | EGFA | AAE | ILEEK | M | GGPM |
| <b>EDP972</b><br>1 rare                                                                       | DPB1* 972:01e | - | LFQG | GEFV | AAE | ILEEK | M | GGPM |
| <i>Both sides of this epitype require RARE alleles, review results to confirm assignment.</i> |               |   |      |      |     |       |   |      |

OR

| EPITYPE                                                                                       | ALLELES       | P GROUP | HVR-A | HVR-B | HVR-C | HVR-D | HVR-E | HVR-F |
|-----------------------------------------------------------------------------------------------|---------------|---------|-------|-------|-------|-------|-------|-------|
| <b>EDP642</b><br>1 rare                                                                       | DPB1* 642:01e | -       | LFQG  | EEFA  | DAE   | ILEEK | M     | GGPM  |
| <b>EDP686</b><br>1 rare                                                                       | DPB1* 686:01e | -       | LFQG  | EGFA  | AAE   | ILEEK | M     | GGPM  |
| <i>Both sides of this epitype require RARE alleles, review results to confirm assignment.</i> |               |         |       |       |       |       |       |       |

OR

| EPITYPE                                                                                       | ALLELES        | P GROUP | HVR-A | HVR-B | HVR-C | HVR-D | HVR-E | HVR-F |
|-----------------------------------------------------------------------------------------------|----------------|---------|-------|-------|-------|-------|-------|-------|
| <b>EDP686</b><br>1 rare                                                                       | DPB1* 686:01e  | -       | LFQG  | EGFA  | AAE   | ILEEK | M     | GGPM  |
| <b>EDP1081</b><br>1 rare                                                                      | DPB1* 1081:01e | -       | LFQG  | EEFA  | AAE   | VLEEK | M     | GGPM  |
| <i>Both sides of this epitype require RARE alleles, review results to confirm assignment.</i> |                |         |       |       |       |       |       |       |

OR

| EPITYPE                                                                                       | ALLELES         | P GROUP | HVR-A | HVR-B | HVR-C | HVR-D | HVR-E | HVR-F |
|-----------------------------------------------------------------------------------------------|-----------------|---------|-------|-------|-------|-------|-------|-------|
| <b>EDP686</b><br>1 rare                                                                       | DPB1* 686:01e   | -       | LFQG  | EGFA  | AAE   | ILEEK | M     | GGPM  |
| <b>EDP1135</b><br>1 rare                                                                      | DPB1* 1135:01Ne | -       | LFQG  | EEFA  | AAE   | ILGGE | D     | GRAH  |
| <i>Both sides of this epitype require RARE alleles, review results to confirm assignment.</i> |                 |         |       |       |       |       |       |       |

OR

| EPITYPE | ALLELES | P GROUP | HVR-A | HVR-B | HVR-C | HVR-D | HVR-E | HVR-F |
|---------|---------|---------|-------|-------|-------|-------|-------|-------|
|---------|---------|---------|-------|-------|-------|-------|-------|-------|

|                                                                                               |               |   |      |      |     |       |   |      |
|-----------------------------------------------------------------------------------------------|---------------|---|------|------|-----|-------|---|------|
| <b>EDP686</b><br>1 rare                                                                       | DPB1* 686:01e | - | LFQG | EGFA | AAE | ILEEK | M | GGPM |
| <b>EDP687</b><br>1 rare                                                                       | DPB1* 687:01e | - | LFQL | EEFA | AAE | ILEEK | M | GGPM |
| <i>Both sides of this epitope require RARE alleles, review results to confirm assignment.</i> |               |   |      |      |     |       |   |      |

OR

| EPITYPE                                                                                       | ALLELES       | P GROUP | HVR-A | HVR-B | HVR-C | HVR-D | HVR-E | HVR-F |
|-----------------------------------------------------------------------------------------------|---------------|---------|-------|-------|-------|-------|-------|-------|
| <b>EDP427</b><br>1 rare                                                                       | DPB1* 427:01e | -       | LFQG  | EEFA  | ATE   | ILEEK | M     | GGPM  |
| <b>EDP686</b><br>1 rare                                                                       | DPB1* 686:01e | -       | LFQG  | EGFA  | AAE   | ILEEK | M     | GGPM  |
| <i>Both sides of this epitope require RARE alleles, review results to confirm assignment.</i> |               |         |       |       |       |       |       |       |

OR

| EPITYPE                                                                                       | ALLELES        | P GROUP | HVR-A | HVR-B | HVR-C | HVR-D | HVR-E | HVR-F |
|-----------------------------------------------------------------------------------------------|----------------|---------|-------|-------|-------|-------|-------|-------|
| <b>EDP686</b><br>1 rare                                                                       | DPB1* 686:01e  | -       | LFQG  | EGFA  | AAE   | ILEEK | M     | GGPM  |
| <b>EDP867</b><br>1 rare                                                                       | DPB1* 867:01Ne | -       | LFQG  | EEFA  | CCG   | HPGGE | D     | GRAH  |
| <i>Both sides of this epitope require RARE alleles, review results to confirm assignment.</i> |                |         |       |       |       |       |       |       |

OR

| EPITYPE                                                                                       | ALLELES       | P GROUP | HVR-A | HVR-B | HVR-C | HVR-D | HVR-E | HVR-F |
|-----------------------------------------------------------------------------------------------|---------------|---------|-------|-------|-------|-------|-------|-------|
| <b>EDP177</b><br>1 rare                                                                       | DPB1* 177:01e | -       | LFQG  | EEFA  | AAE   | ILEEK | M     | SGPM  |
| <b>EDP686</b><br>1 rare                                                                       | DPB1* 686:01e | -       | LFQG  | EGFA  | AAE   | ILEEK | M     | GGPM  |
| <i>Both sides of this epitope require RARE alleles, review results to confirm assignment.</i> |               |         |       |       |       |       |       |       |

OR

| EPITYPE | ALLELES | P GROUP | HVR-A | HVR-B | HVR-C | HVR-D | HVR-E | HVR-F |
|---------|---------|---------|-------|-------|-------|-------|-------|-------|
|---------|---------|---------|-------|-------|-------|-------|-------|-------|

|                                                                                               |               |   |      |      |     |       |   |      |
|-----------------------------------------------------------------------------------------------|---------------|---|------|------|-----|-------|---|------|
| <b>EDP686</b><br>1 rare                                                                       | DPB1* 686:01e | - | LFQG | EGFA | AAE | ILEEK | M | GGPM |
| <b>EDP747</b><br>1 rare                                                                       | DPB1* 747:01e | - | VFQG | EEFA | AAE | ILEEK | M | GGPM |
| <i>Both sides of this epitope require RARE alleles, review results to confirm assignment.</i> |               |   |      |      |     |       |   |      |

OR

| EPITYPE                                                                                       | ALLELES        | P GROUP | HVR-A | HVR-B | HVR-C | HVR-D | HVR-E | HVR-F |
|-----------------------------------------------------------------------------------------------|----------------|---------|-------|-------|-------|-------|-------|-------|
| <b>EDP686</b><br>1 rare                                                                       | DPB1* 686:01e  | -       | LFQG  | EGFA  | AAE   | ILEEK | M     | GGPM  |
| <b>EDP1122</b><br>1 rare                                                                      | DPB1* 1122:01e | -       | LFQG  | EECA  | AAE   | ILEEK | M     | GGPM  |
| <i>Both sides of this epitope require RARE alleles, review results to confirm assignment.</i> |                |         |       |       |       |       |       |       |

OR

| EPITYPE                                                                                       | ALLELES       | P GROUP | HVR-A | HVR-B | HVR-C | HVR-D | HVR-E | HVR-F |
|-----------------------------------------------------------------------------------------------|---------------|---------|-------|-------|-------|-------|-------|-------|
| <b>EDP280</b><br>1 rare                                                                       | DPB1* 280:01e | -       | LFQG  | EEFA  | AAE   | ILEEK | M     | GAPM  |
| <b>EDP686</b><br>1 rare                                                                       | DPB1* 686:01e | -       | LFQG  | EGFA  | AAE   | ILEEK | M     | GGPM  |
| <i>Both sides of this epitope require RARE alleles, review results to confirm assignment.</i> |               |         |       |       |       |       |       |       |

OR

| EPITYPE                                                                                       | ALLELES       | P GROUP | HVR-A | HVR-B | HVR-C | HVR-D | HVR-E | HVR-F |
|-----------------------------------------------------------------------------------------------|---------------|---------|-------|-------|-------|-------|-------|-------|
| <b>EDP230</b><br>1 rare                                                                       | DPB1* 230:01e | -       | LFQG  | EEFA  | AAE   | ILEEK | M     | GWPM  |
| <b>EDP686</b><br>1 rare                                                                       | DPB1* 686:01e | -       | LFQG  | EGFA  | AAE   | ILEEK | M     | GGPM  |
| <i>Both sides of this epitope require RARE alleles, review results to confirm assignment.</i> |               |         |       |       |       |       |       |       |

OR

| EPITYPE | ALLELES | P GROUP | HVR-A | HVR-B | HVR-C | HVR-D | HVR-E | HVR-F |
|---------|---------|---------|-------|-------|-------|-------|-------|-------|
|---------|---------|---------|-------|-------|-------|-------|-------|-------|

|                                                                                               |                |   |      |      |     |       |   |      |
|-----------------------------------------------------------------------------------------------|----------------|---|------|------|-----|-------|---|------|
| <b>EDP570</b><br>1 rare                                                                       | DPB1* 911:01Ne | - | -    | -    | -   | -     | - | -    |
| <b>EDP686</b><br>1 rare                                                                       | DPB1* 686:01e  | - | LFQG | EGFA | AAE | ILEEK | M | GGPM |
| <i>Both sides of this epitype require RARE alleles, review results to confirm assignment.</i> |                |   |      |      |     |       |   |      |

OR

| EPITYPE                                                                                       | ALLELES       | P GROUP | HVR-A | HVR-B | HVR-C | HVR-D | HVR-E | HVR-F |
|-----------------------------------------------------------------------------------------------|---------------|---------|-------|-------|-------|-------|-------|-------|
| <b>EDP686</b><br>1 rare                                                                       | DPB1* 686:01e | -       | LFQG  | EGFA  | AAE   | ILEEK | M     | GGPM  |
| <b>EDP840</b><br>1 rare                                                                       | DPB1* 840:01e | -       | IFQG  | EEFA  | AAE   | ILEEK | M     | GGPM  |
| <i>Both sides of this epitype require RARE alleles, review results to confirm assignment.</i> |               |         |       |       |       |       |       |       |

OR

| EPITYPE                                                                                       | ALLELES       | P GROUP | HVR-A | HVR-B | HVR-C | HVR-D | HVR-E | HVR-F |
|-----------------------------------------------------------------------------------------------|---------------|---------|-------|-------|-------|-------|-------|-------|
| <b>EDP176</b><br>1 rare                                                                       | DPB1* 176:01e | -       | LFQG  | EEFA  | AAE   | ILKEK | M     | GGPM  |
| <b>EDP456</b><br>1 rare                                                                       | DPB1* 456:01e | -       | LFQG  | EEFA  | AAE   | ILEVK | M     | GGPM  |
| <i>Both sides of this epitype require RARE alleles, review results to confirm assignment.</i> |               |         |       |       |       |       |       |       |

OR

| EPITYPE                                                                                       | ALLELES        | P GROUP | HVR-A | HVR-B | HVR-C | HVR-D | HVR-E | HVR-F |
|-----------------------------------------------------------------------------------------------|----------------|---------|-------|-------|-------|-------|-------|-------|
| <b>EDP176</b><br>1 rare                                                                       | DPB1* 176:01e  | -       | LFQG  | EEFA  | AAE   | ILKEK | M     | GGPM  |
| <b>EDP1097</b><br>1 rare                                                                      | DPB1* 1097:01e | -       | LFLG  | EEFA  | AAE   | ILEEK | M     | GGPM  |
| <i>Both sides of this epitype require RARE alleles, review results to confirm assignment.</i> |                |         |       |       |       |       |       |       |

OR

| EPITYPE | ALLELES | P GROUP | HVR-A | HVR-B | HVR-C | HVR-D | HVR-E | HVR-F |
|---------|---------|---------|-------|-------|-------|-------|-------|-------|
|---------|---------|---------|-------|-------|-------|-------|-------|-------|

|                                                                                               |               |   |      |      |     |       |   |      |
|-----------------------------------------------------------------------------------------------|---------------|---|------|------|-----|-------|---|------|
| <b>EDP176</b><br>1 rare                                                                       | DPB1* 176:01e | - | LFQG | EEFA | AAE | ILKEK | M | GGPM |
| <b>EDP303</b><br>1 rare                                                                       | DPB1* 303:01e | - | LFQG | EEFA | AAE | ILEER | M | GGPM |
| <i>Both sides of this epitope require RARE alleles, review results to confirm assignment.</i> |               |   |      |      |     |       |   |      |

OR

| EPITYPE                                                                                       | ALLELES       | P GROUP | HVR-A | HVR-B | HVR-C | HVR-D | HVR-E | HVR-F |
|-----------------------------------------------------------------------------------------------|---------------|---------|-------|-------|-------|-------|-------|-------|
| <b>EDP176</b><br>1 rare                                                                       | DPB1* 176:01e | -       | LFQG  | EEFA  | AAE   | ILKEK | M     | GGPM  |
| <b>EDP753</b><br>1 rare                                                                       | DPB1* 753:01e | -       | FFQG  | EEFA  | AAE   | ILEEK | M     | GGPM  |
| <i>Both sides of this epitope require RARE alleles, review results to confirm assignment.</i> |               |         |       |       |       |       |       |       |

OR

| EPITYPE                                                                                       | ALLELES        | P GROUP | HVR-A | HVR-B | HVR-C | HVR-D | HVR-E | HVR-F |
|-----------------------------------------------------------------------------------------------|----------------|---------|-------|-------|-------|-------|-------|-------|
| <b>EDP176</b><br>1 rare                                                                       | DPB1* 176:01e  | -       | LFQG  | EEFA  | AAE   | ILKEK | M     | GGPM  |
| <b>EDP934</b><br>1 rare                                                                       | DPB1* 934:01Qe | -       | LFQG  | EF.A  | AAE   | ILEEK | M     | GGPM  |
| <i>Both sides of this epitope require RARE alleles, review results to confirm assignment.</i> |                |         |       |       |       |       |       |       |

OR

| EPITYPE                                                                                       | ALLELES        | P GROUP | HVR-A | HVR-B | HVR-C | HVR-D | HVR-E | HVR-F |
|-----------------------------------------------------------------------------------------------|----------------|---------|-------|-------|-------|-------|-------|-------|
| <b>EDP176</b><br>1 rare                                                                       | DPB1* 176:01e  | -       | LFQG  | EEFA  | AAE   | ILKEK | M     | GGPM  |
| <b>EDP874</b><br>1 rare                                                                       | DPB1* 874:01Ne | -       | LFQG  | EEFA  | AAE   | ILEEK | C     | -     |
| <i>Both sides of this epitope require RARE alleles, review results to confirm assignment.</i> |                |         |       |       |       |       |       |       |

OR

| EPITYPE | ALLELES | P GROUP | HVR-A | HVR-B | HVR-C | HVR-D | HVR-E | HVR-F |
|---------|---------|---------|-------|-------|-------|-------|-------|-------|
|---------|---------|---------|-------|-------|-------|-------|-------|-------|

|                                                                                               |               |   |      |      |     |       |   |      |
|-----------------------------------------------------------------------------------------------|---------------|---|------|------|-----|-------|---|------|
| <b>EDP176</b><br>1 rare                                                                       | DPB1* 176:01e | - | LFQG | EEFA | AAE | ILKEK | M | GGPM |
| <b>EDP254</b><br>1 rare                                                                       | DPB1* 254:01e | - | LFQG | EEFA | AVE | ILEEK | M | GGPM |
| <i>Both sides of this epitype require RARE alleles, review results to confirm assignment.</i> |               |   |      |      |     |       |   |      |

OR

| EPITYPE                                                                                       | ALLELES       | P GROUP | HVR-A | HVR-B | HVR-C | HVR-D | HVR-E | HVR-F |
|-----------------------------------------------------------------------------------------------|---------------|---------|-------|-------|-------|-------|-------|-------|
| <b>EDP176</b><br>1 rare                                                                       | DPB1* 176:01e | -       | LFQG  | EEFA  | AAE   | ILKEK | M     | GGPM  |
| <b>EDP454</b><br>1 rare                                                                       | DPB1* 454:01e | -       | LFQG  | EEFA  | AAE   | ILEEK | M     | GEPM  |
| <i>Both sides of this epitype require RARE alleles, review results to confirm assignment.</i> |               |         |       |       |       |       |       |       |

OR

| EPITYPE                                                                                       | ALLELES        | P GROUP | HVR-A | HVR-B | HVR-C | HVR-D | HVR-E | HVR-F |
|-----------------------------------------------------------------------------------------------|----------------|---------|-------|-------|-------|-------|-------|-------|
| <b>EDP176</b><br>1 rare                                                                       | DPB1* 176:01e  | -       | LFQG  | EEFA  | AAE   | ILKEK | M     | GGPM  |
| <b>EDP1046</b><br>1 rare                                                                      | DPB1* 1046:01e | -       | LFQG  | EEIA  | AAE   | ILEEK | M     | GGPM  |
| <i>Both sides of this epitype require RARE alleles, review results to confirm assignment.</i> |                |         |       |       |       |       |       |       |

OR

| EPITYPE                                                                                       | ALLELES       | P GROUP | HVR-A | HVR-B | HVR-C | HVR-D | HVR-E | HVR-F |
|-----------------------------------------------------------------------------------------------|---------------|---------|-------|-------|-------|-------|-------|-------|
| <b>EDP176</b><br>1 rare                                                                       | DPB1* 176:01e | -       | LFQG  | EEFA  | AAE   | ILKEK | M     | GGPM  |
| <b>EDP921</b><br>1 rare                                                                       | DPB1* 921:01e | -       | LFQG  | GEFA  | AAE   | ILEEK | M     | GGPM  |
| <i>Both sides of this epitype require RARE alleles, review results to confirm assignment.</i> |               |         |       |       |       |       |       |       |

OR

| EPITYPE | ALLELES | P GROUP | HVR-A | HVR-B | HVR-C | HVR-D | HVR-E | HVR-F |
|---------|---------|---------|-------|-------|-------|-------|-------|-------|
|---------|---------|---------|-------|-------|-------|-------|-------|-------|



|                                                                                               |                |   |      |      |     |       |   |      |
|-----------------------------------------------------------------------------------------------|----------------|---|------|------|-----|-------|---|------|
| <b>EDP176</b><br>1 rare                                                                       | DPB1* 176:01e  | - | LFQG | EEFA | AAE | ILKEK | M | GGPM |
| <b>EDP871</b><br>1 rare                                                                       | DPB1* 871:01Ne | - | LFQG | EEFA | AAE | HPGGE | D | GRAH |
| <i>Both sides of this epitype require RARE alleles, review results to confirm assignment.</i> |                |   |      |      |     |       |   |      |

OR

| EPITYPE                                                                                       | ALLELES       | P GROUP | HVR-A | HVR-B | HVR-C | HVR-D | HVR-E | HVR-F |
|-----------------------------------------------------------------------------------------------|---------------|---------|-------|-------|-------|-------|-------|-------|
| <b>EDP176</b><br>1 rare                                                                       | DPB1* 176:01e | -       | LFQG  | EEFA  | AAE   | ILKEK | M     | GGPM  |
| <b>EDP399</b><br>1 rare                                                                       | DPB1* 399:01e | -       | LFQG  | EEFA  | AAE   | IVEEK | M     | GGPM  |
| <i>Both sides of this epitype require RARE alleles, review results to confirm assignment.</i> |               |         |       |       |       |       |       |       |

OR

| EPITYPE                                                                                       | ALLELES       | P GROUP | HVR-A | HVR-B | HVR-C | HVR-D | HVR-E | HVR-F |
|-----------------------------------------------------------------------------------------------|---------------|---------|-------|-------|-------|-------|-------|-------|
| <b>EDP176</b><br>1 rare                                                                       | DPB1* 176:01e | -       | LFQG  | EEFA  | AAE   | ILKEK | M     | GGPM  |
| <b>EDP319</b><br>1 rare                                                                       | DPB1* 319:01e | -       | LFQG  | EEFA  | AAE   | IQEEK | M     | GGPM  |
| <i>Both sides of this epitype require RARE alleles, review results to confirm assignment.</i> |               |         |       |       |       |       |       |       |

OR

| EPITYPE                                                                                       | ALLELES       | P GROUP | HVR-A | HVR-B | HVR-C | HVR-D | HVR-E | HVR-F |
|-----------------------------------------------------------------------------------------------|---------------|---------|-------|-------|-------|-------|-------|-------|
| <b>EDP176</b><br>1 rare                                                                       | DPB1* 176:01e | -       | LFQG  | EEFA  | AAE   | ILKEK | M     | GGPM  |
| <b>EDP179</b><br>1 rare                                                                       | DPB1* 179:01e | -       | LFQG  | EEFA  | AAE   | LLEER | M     | GGPM  |
| <i>Both sides of this epitype require RARE alleles, review results to confirm assignment.</i> |               |         |       |       |       |       |       |       |

OR

| EPITYPE | ALLELES | P GROUP | HVR-A | HVR-B | HVR-C | HVR-D | HVR-E | HVR-F |
|---------|---------|---------|-------|-------|-------|-------|-------|-------|
|---------|---------|---------|-------|-------|-------|-------|-------|-------|

|                                                                                               |               |   |      |      |     |       |   |      |
|-----------------------------------------------------------------------------------------------|---------------|---|------|------|-----|-------|---|------|
| <b>EDP176</b><br>1 rare                                                                       | DPB1* 176:01e | - | LFQG | EEFA | AAE | ILKEK | M | GGPM |
| <b>EDP679</b><br>1 rare                                                                       | DPB1* 679:01e | - | PFQG | EEFA | AAE | ILEEK | M | GGPM |
| <i>Both sides of this epitype require RARE alleles, review results to confirm assignment.</i> |               |   |      |      |     |       |   |      |

OR

| EPITYPE                                                                                       | ALLELES       | P GROUP | HVR-A | HVR-B | HVR-C | HVR-D | HVR-E | HVR-F |
|-----------------------------------------------------------------------------------------------|---------------|---------|-------|-------|-------|-------|-------|-------|
| <b>EDP176</b><br>1 rare                                                                       | DPB1* 176:01e | -       | LFQG  | EEFA  | AAE   | ILKEK | M     | GGPM  |
| <b>EDP592</b><br>1 rare                                                                       | DPB1* 592:01e | -       | LFQG  | EEFA  | AAE   | ILEEK | M     | GGPR  |
| <i>Both sides of this epitype require RARE alleles, review results to confirm assignment.</i> |               |         |       |       |       |       |       |       |

OR

| EPITYPE                                                                                       | ALLELES       | P GROUP | HVR-A | HVR-B | HVR-C | HVR-D | HVR-E | HVR-F |
|-----------------------------------------------------------------------------------------------|---------------|---------|-------|-------|-------|-------|-------|-------|
| <b>EDP176</b><br>1 rare                                                                       | DPB1* 176:01e | -       | LFQG  | EEFA  | AAE   | ILKEK | M     | GGPM  |
| <b>EDP972</b><br>1 rare                                                                       | DPB1* 972:01e | -       | LFQG  | GEFV  | AAE   | ILEEK | M     | GGPM  |
| <i>Both sides of this epitype require RARE alleles, review results to confirm assignment.</i> |               |         |       |       |       |       |       |       |

OR

| EPITYPE                                                                                       | ALLELES       | P GROUP | HVR-A | HVR-B | HVR-C | HVR-D | HVR-E | HVR-F |
|-----------------------------------------------------------------------------------------------|---------------|---------|-------|-------|-------|-------|-------|-------|
| <b>EDP176</b><br>1 rare                                                                       | DPB1* 176:01e | -       | LFQG  | EEFA  | AAE   | ILKEK | M     | GGPM  |
| <b>EDP642</b><br>1 rare                                                                       | DPB1* 642:01e | -       | LFQG  | EEFA  | DAE   | ILEEK | M     | GGPM  |
| <i>Both sides of this epitype require RARE alleles, review results to confirm assignment.</i> |               |         |       |       |       |       |       |       |

OR

| EPITYPE | ALLELES | P GROUP | HVR-A | HVR-B | HVR-C | HVR-D | HVR-E | HVR-F |
|---------|---------|---------|-------|-------|-------|-------|-------|-------|
|---------|---------|---------|-------|-------|-------|-------|-------|-------|

|                                                                                               |                |   |      |      |     |       |   |      |
|-----------------------------------------------------------------------------------------------|----------------|---|------|------|-----|-------|---|------|
| <b>EDP176</b><br>1 rare                                                                       | DPB1* 176:01e  | - | LFQG | EEFA | AAE | ILKEK | M | GGPM |
| <b>EDP1081</b><br>1 rare                                                                      | DPB1* 1081:01e | - | LFQG | EEFA | AAE | VLEEK | M | GGPM |
| <i>Both sides of this epitype require RARE alleles, review results to confirm assignment.</i> |                |   |      |      |     |       |   |      |

OR

| EPITYPE                                                                                       | ALLELES         | P GROUP | HVR-A | HVR-B | HVR-C | HVR-D | HVR-E | HVR-F |
|-----------------------------------------------------------------------------------------------|-----------------|---------|-------|-------|-------|-------|-------|-------|
| <b>EDP176</b><br>1 rare                                                                       | DPB1* 176:01e   | -       | LFQG  | EEFA  | AAE   | ILKEK | M     | GGPM  |
| <b>EDP1135</b><br>1 rare                                                                      | DPB1* 1135:01Ne | -       | LFQG  | EEFA  | AAE   | ILGGE | D     | GRAH  |
| <i>Both sides of this epitype require RARE alleles, review results to confirm assignment.</i> |                 |         |       |       |       |       |       |       |

OR

| EPITYPE                                                                                       | ALLELES       | P GROUP | HVR-A | HVR-B | HVR-C | HVR-D | HVR-E | HVR-F |
|-----------------------------------------------------------------------------------------------|---------------|---------|-------|-------|-------|-------|-------|-------|
| <b>EDP176</b><br>1 rare                                                                       | DPB1* 176:01e | -       | LFQG  | EEFA  | AAE   | ILKEK | M     | GGPM  |
| <b>EDP687</b><br>1 rare                                                                       | DPB1* 687:01e | -       | LFQL  | EEFA  | AAE   | ILEEK | M     | GGPM  |
| <i>Both sides of this epitype require RARE alleles, review results to confirm assignment.</i> |               |         |       |       |       |       |       |       |

OR

| EPITYPE                                                                                       | ALLELES       | P GROUP | HVR-A | HVR-B | HVR-C | HVR-D | HVR-E | HVR-F |
|-----------------------------------------------------------------------------------------------|---------------|---------|-------|-------|-------|-------|-------|-------|
| <b>EDP176</b><br>1 rare                                                                       | DPB1* 176:01e | -       | LFQG  | EEFA  | AAE   | ILKEK | M     | GGPM  |
| <b>EDP427</b><br>1 rare                                                                       | DPB1* 427:01e | -       | LFQG  | EEFA  | ATE   | ILEEK | M     | GGPM  |
| <i>Both sides of this epitype require RARE alleles, review results to confirm assignment.</i> |               |         |       |       |       |       |       |       |

OR

| EPITYPE | ALLELES | P GROUP | HVR-A | HVR-B | HVR-C | HVR-D | HVR-E | HVR-F |
|---------|---------|---------|-------|-------|-------|-------|-------|-------|
|---------|---------|---------|-------|-------|-------|-------|-------|-------|

|                                                                                               |                |   |      |      |     |       |   |      |
|-----------------------------------------------------------------------------------------------|----------------|---|------|------|-----|-------|---|------|
| <b>EDP176</b><br>1 rare                                                                       | DPB1* 176:01e  | - | LFQG | EEFA | AAE | ILKEK | M | GGPM |
| <b>EDP867</b><br>1 rare                                                                       | DPB1* 867:01Ne | - | LFQG | EEFA | CCG | HPGGE | D | GRAH |
| <i>Both sides of this epitype require RARE alleles, review results to confirm assignment.</i> |                |   |      |      |     |       |   |      |

OR

| EPITYPE                                                                                       | ALLELES       | P GROUP | HVR-A | HVR-B | HVR-C | HVR-D | HVR-E | HVR-F |
|-----------------------------------------------------------------------------------------------|---------------|---------|-------|-------|-------|-------|-------|-------|
| <b>EDP176</b><br>1 rare                                                                       | DPB1* 176:01e | -       | LFQG  | EEFA  | AAE   | ILKEK | M     | GGPM  |
| <b>EDP177</b><br>1 rare                                                                       | DPB1* 177:01e | -       | LFQG  | EEFA  | AAE   | ILEEK | M     | SGPM  |
| <i>Both sides of this epitype require RARE alleles, review results to confirm assignment.</i> |               |         |       |       |       |       |       |       |

OR

| EPITYPE                                                                                       | ALLELES       | P GROUP | HVR-A | HVR-B | HVR-C | HVR-D | HVR-E | HVR-F |
|-----------------------------------------------------------------------------------------------|---------------|---------|-------|-------|-------|-------|-------|-------|
| <b>EDP176</b><br>1 rare                                                                       | DPB1* 176:01e | -       | LFQG  | EEFA  | AAE   | ILKEK | M     | GGPM  |
| <b>EDP747</b><br>1 rare                                                                       | DPB1* 747:01e | -       | VFQG  | EEFA  | AAE   | ILEEK | M     | GGPM  |
| <i>Both sides of this epitype require RARE alleles, review results to confirm assignment.</i> |               |         |       |       |       |       |       |       |

OR

| EPITYPE                                                                                       | ALLELES        | P GROUP | HVR-A | HVR-B | HVR-C | HVR-D | HVR-E | HVR-F |
|-----------------------------------------------------------------------------------------------|----------------|---------|-------|-------|-------|-------|-------|-------|
| <b>EDP176</b><br>1 rare                                                                       | DPB1* 176:01e  | -       | LFQG  | EEFA  | AAE   | ILKEK | M     | GGPM  |
| <b>EDP1122</b><br>1 rare                                                                      | DPB1* 1122:01e | -       | LFQG  | EECA  | AAE   | ILEEK | M     | GGPM  |
| <i>Both sides of this epitype require RARE alleles, review results to confirm assignment.</i> |                |         |       |       |       |       |       |       |

OR

| EPITYPE | ALLELES | P GROUP | HVR-A | HVR-B | HVR-C | HVR-D | HVR-E | HVR-F |
|---------|---------|---------|-------|-------|-------|-------|-------|-------|
|---------|---------|---------|-------|-------|-------|-------|-------|-------|

|                                                                                               |               |   |      |      |     |       |   |      |
|-----------------------------------------------------------------------------------------------|---------------|---|------|------|-----|-------|---|------|
| <b>EDP176</b><br>1 rare                                                                       | DPB1* 176:01e | - | LFQG | EEFA | AAE | ILKEK | M | GGPM |
| <b>EDP280</b><br>1 rare                                                                       | DPB1* 280:01e | - | LFQG | EEFA | AAE | ILEEK | M | GAPM |
| <i>Both sides of this epitype require RARE alleles, review results to confirm assignment.</i> |               |   |      |      |     |       |   |      |

OR

| EPITYPE                                                                                       | ALLELES       | P GROUP | HVR-A | HVR-B | HVR-C | HVR-D | HVR-E | HVR-F |
|-----------------------------------------------------------------------------------------------|---------------|---------|-------|-------|-------|-------|-------|-------|
| <b>EDP176</b><br>1 rare                                                                       | DPB1* 176:01e | -       | LFQG  | EEFA  | AAE   | ILKEK | M     | GGPM  |
| <b>EDP230</b><br>1 rare                                                                       | DPB1* 230:01e | -       | LFQG  | EEFA  | AAE   | ILEEK | M     | GWPM  |
| <i>Both sides of this epitype require RARE alleles, review results to confirm assignment.</i> |               |         |       |       |       |       |       |       |

OR

| EPITYPE                                                                                       | ALLELES        | P GROUP | HVR-A | HVR-B | HVR-C | HVR-D | HVR-E | HVR-F |
|-----------------------------------------------------------------------------------------------|----------------|---------|-------|-------|-------|-------|-------|-------|
| <b>EDP176</b><br>1 rare                                                                       | DPB1* 176:01e  | -       | LFQG  | EEFA  | AAE   | ILKEK | M     | GGPM  |
| <b>EDP570</b><br>1 rare                                                                       | DPB1* 911:01Ne | -       | -     | -     | -     | -     | -     | -     |
| <i>Both sides of this epitype require RARE alleles, review results to confirm assignment.</i> |                |         |       |       |       |       |       |       |

OR

| EPITYPE                                                                                       | ALLELES       | P GROUP | HVR-A | HVR-B | HVR-C | HVR-D | HVR-E | HVR-F |
|-----------------------------------------------------------------------------------------------|---------------|---------|-------|-------|-------|-------|-------|-------|
| <b>EDP176</b><br>1 rare                                                                       | DPB1* 176:01e | -       | LFQG  | EEFA  | AAE   | ILKEK | M     | GGPM  |
| <b>EDP840</b><br>1 rare                                                                       | DPB1* 840:01e | -       | IFQG  | EEFA  | AAE   | ILEEK | M     | GGPM  |
| <i>Both sides of this epitype require RARE alleles, review results to confirm assignment.</i> |               |         |       |       |       |       |       |       |

OR

| EPITYPE | ALLELES | P GROUP | HVR-A | HVR-B | HVR-C | HVR-D | HVR-E | HVR-F |
|---------|---------|---------|-------|-------|-------|-------|-------|-------|
|---------|---------|---------|-------|-------|-------|-------|-------|-------|

|                                                                                               |                |   |      |      |     |       |   |      |
|-----------------------------------------------------------------------------------------------|----------------|---|------|------|-----|-------|---|------|
| <b>EDP456</b><br>1 rare                                                                       | DPB1* 456:01e  | - | LFQG | EEFA | AAE | ILEVK | M | GGPM |
| <b>EDP1097</b><br>1 rare                                                                      | DPB1* 1097:01e | - | LFLG | EEFA | AAE | ILEEK | M | GGPM |
| <i>Both sides of this epitype require RARE alleles, review results to confirm assignment.</i> |                |   |      |      |     |       |   |      |

OR

| EPITYPE                                                                                       | ALLELES       | P GROUP | HVR-A | HVR-B | HVR-C | HVR-D | HVR-E | HVR-F |
|-----------------------------------------------------------------------------------------------|---------------|---------|-------|-------|-------|-------|-------|-------|
| <b>EDP303</b><br>1 rare                                                                       | DPB1* 303:01e | -       | LFQG  | EEFA  | AAE   | ILEER | M     | GGPM  |
| <b>EDP456</b><br>1 rare                                                                       | DPB1* 456:01e | -       | LFQG  | EEFA  | AAE   | ILEVK | M     | GGPM  |
| <i>Both sides of this epitype require RARE alleles, review results to confirm assignment.</i> |               |         |       |       |       |       |       |       |

OR

| EPITYPE                                                                                       | ALLELES       | P GROUP | HVR-A | HVR-B | HVR-C | HVR-D | HVR-E | HVR-F |
|-----------------------------------------------------------------------------------------------|---------------|---------|-------|-------|-------|-------|-------|-------|
| <b>EDP456</b><br>1 rare                                                                       | DPB1* 456:01e | -       | LFQG  | EEFA  | AAE   | ILEVK | M     | GGPM  |
| <b>EDP753</b><br>1 rare                                                                       | DPB1* 753:01e | -       | FFQG  | EEFA  | AAE   | ILEEK | M     | GGPM  |
| <i>Both sides of this epitype require RARE alleles, review results to confirm assignment.</i> |               |         |       |       |       |       |       |       |

OR

| EPITYPE                                                                                       | ALLELES        | P GROUP | HVR-A | HVR-B | HVR-C | HVR-D | HVR-E | HVR-F |
|-----------------------------------------------------------------------------------------------|----------------|---------|-------|-------|-------|-------|-------|-------|
| <b>EDP456</b><br>1 rare                                                                       | DPB1* 456:01e  | -       | LFQG  | EEFA  | AAE   | ILEVK | M     | GGPM  |
| <b>EDP934</b><br>1 rare                                                                       | DPB1* 934:01Qe | -       | LFQG  | EFA   | AAE   | ILEEK | M     | GGPM  |
| <i>Both sides of this epitype require RARE alleles, review results to confirm assignment.</i> |                |         |       |       |       |       |       |       |

OR

| EPITYPE | ALLELES | P GROUP | HVR-A | HVR-B | HVR-C | HVR-D | HVR-E | HVR-F |
|---------|---------|---------|-------|-------|-------|-------|-------|-------|
|---------|---------|---------|-------|-------|-------|-------|-------|-------|

|                                                                                               |                |   |      |      |     |       |   |      |
|-----------------------------------------------------------------------------------------------|----------------|---|------|------|-----|-------|---|------|
| <b>EDP456</b><br>1 rare                                                                       | DPB1* 456:01e  | - | LFQG | EEFA | AAE | ILEVK | M | GGPM |
| <b>EDP874</b><br>1 rare                                                                       | DPB1* 874:01Ne | - | LFQG | EEFA | AAE | ILEEK | C | -    |
| <i>Both sides of this epitype require RARE alleles, review results to confirm assignment.</i> |                |   |      |      |     |       |   |      |

OR

| EPITYPE                                                                                       | ALLELES       | P GROUP | HVR-A | HVR-B | HVR-C | HVR-D | HVR-E | HVR-F |
|-----------------------------------------------------------------------------------------------|---------------|---------|-------|-------|-------|-------|-------|-------|
| <b>EDP254</b><br>1 rare                                                                       | DPB1* 254:01e | -       | LFQG  | EEFA  | AVE   | ILEEK | M     | GGPM  |
| <b>EDP456</b><br>1 rare                                                                       | DPB1* 456:01e | -       | LFQG  | EEFA  | AAE   | ILEVK | M     | GGPM  |
| <i>Both sides of this epitype require RARE alleles, review results to confirm assignment.</i> |               |         |       |       |       |       |       |       |

OR

| EPITYPE                                                                                       | ALLELES       | P GROUP | HVR-A | HVR-B | HVR-C | HVR-D | HVR-E | HVR-F |
|-----------------------------------------------------------------------------------------------|---------------|---------|-------|-------|-------|-------|-------|-------|
| <b>EDP454</b><br>1 rare                                                                       | DPB1* 454:01e | -       | LFQG  | EEFA  | AAE   | ILEEK | M     | GEPM  |
| <b>EDP456</b><br>1 rare                                                                       | DPB1* 456:01e | -       | LFQG  | EEFA  | AAE   | ILEVK | M     | GGPM  |
| <i>Both sides of this epitype require RARE alleles, review results to confirm assignment.</i> |               |         |       |       |       |       |       |       |

OR

| EPITYPE                                                                                       | ALLELES        | P GROUP | HVR-A | HVR-B | HVR-C | HVR-D | HVR-E | HVR-F |
|-----------------------------------------------------------------------------------------------|----------------|---------|-------|-------|-------|-------|-------|-------|
| <b>EDP456</b><br>1 rare                                                                       | DPB1* 456:01e  | -       | LFQG  | EEFA  | AAE   | ILEVK | M     | GGPM  |
| <b>EDP1046</b><br>1 rare                                                                      | DPB1* 1046:01e | -       | LFQG  | EEIA  | AAE   | ILEEK | M     | GGPM  |
| <i>Both sides of this epitype require RARE alleles, review results to confirm assignment.</i> |                |         |       |       |       |       |       |       |

OR

| EPITYPE | ALLELES | P GROUP | HVR-A | HVR-B | HVR-C | HVR-D | HVR-E | HVR-F |
|---------|---------|---------|-------|-------|-------|-------|-------|-------|
|---------|---------|---------|-------|-------|-------|-------|-------|-------|

|                                                                                               |               |   |      |      |     |       |   |      |
|-----------------------------------------------------------------------------------------------|---------------|---|------|------|-----|-------|---|------|
| <b>EDP456</b><br>1 rare                                                                       | DPB1* 456:01e | - | LFQG | EEFA | AAE | ILEVK | M | GGPM |
| <b>EDP921</b><br>1 rare                                                                       | DPB1* 921:01e | - | LFQG | GEFA | AAE | ILEEK | M | GGPM |
| <i>Both sides of this epitype require RARE alleles, review results to confirm assignment.</i> |               |   |      |      |     |       |   |      |

OR

| EPITYPE                                                                                       | ALLELES        | P GROUP | HVR-A | HVR-B | HVR-C | HVR-D | HVR-E | HVR-F |
|-----------------------------------------------------------------------------------------------|----------------|---------|-------|-------|-------|-------|-------|-------|
| <b>EDP456</b><br>1 rare                                                                       | DPB1* 456:01e  | -       | LFQG  | EEFA  | AAE   | ILEVK | M     | GGPM  |
| <b>EDP871</b><br>1 rare                                                                       | DPB1* 871:01Ne | -       | LFQG  | EEFA  | AAE   | HPGGE | D     | GRAH  |
| <i>Both sides of this epitype require RARE alleles, review results to confirm assignment.</i> |                |         |       |       |       |       |       |       |

OR

| EPITYPE                                                                                       | ALLELES       | P GROUP | HVR-A | HVR-B | HVR-C | HVR-D | HVR-E | HVR-F |
|-----------------------------------------------------------------------------------------------|---------------|---------|-------|-------|-------|-------|-------|-------|
| <b>EDP399</b><br>1 rare                                                                       | DPB1* 399:01e | -       | LFQG  | EEFA  | AAE   | IVEEK | M     | GGPM  |
| <b>EDP456</b><br>1 rare                                                                       | DPB1* 456:01e | -       | LFQG  | EEFA  | AAE   | ILEVK | M     | GGPM  |
| <i>Both sides of this epitype require RARE alleles, review results to confirm assignment.</i> |               |         |       |       |       |       |       |       |

OR

| EPITYPE                                                                                       | ALLELES       | P GROUP | HVR-A | HVR-B | HVR-C | HVR-D | HVR-E | HVR-F |
|-----------------------------------------------------------------------------------------------|---------------|---------|-------|-------|-------|-------|-------|-------|
| <b>EDP319</b><br>1 rare                                                                       | DPB1* 319:01e | -       | LFQG  | EEFA  | AAE   | IQEEK | M     | GGPM  |
| <b>EDP456</b><br>1 rare                                                                       | DPB1* 456:01e | -       | LFQG  | EEFA  | AAE   | ILEVK | M     | GGPM  |
| <i>Both sides of this epitype require RARE alleles, review results to confirm assignment.</i> |               |         |       |       |       |       |       |       |

OR

| EPITYPE | ALLELES | P GROUP | HVR-A | HVR-B | HVR-C | HVR-D | HVR-E | HVR-F |
|---------|---------|---------|-------|-------|-------|-------|-------|-------|
|---------|---------|---------|-------|-------|-------|-------|-------|-------|



|                                                                                               |               |   |      |      |     |       |   |      |
|-----------------------------------------------------------------------------------------------|---------------|---|------|------|-----|-------|---|------|
| <b>EDP179</b><br>1 rare                                                                       | DPB1* 179:01e | - | LFQG | EEFA | AAE | LLEER | M | GGPM |
| <b>EDP456</b><br>1 rare                                                                       | DPB1* 456:01e | - | LFQG | EEFA | AAE | ILEVK | M | GGPM |
| <i>Both sides of this epitype require RARE alleles, review results to confirm assignment.</i> |               |   |      |      |     |       |   |      |

OR

| EPITYPE                                                                                       | ALLELES       | P GROUP | HVR-A | HVR-B | HVR-C | HVR-D | HVR-E | HVR-F |
|-----------------------------------------------------------------------------------------------|---------------|---------|-------|-------|-------|-------|-------|-------|
| <b>EDP456</b><br>1 rare                                                                       | DPB1* 456:01e | -       | LFQG  | EEFA  | AAE   | ILEVK | M     | GGPM  |
| <b>EDP679</b><br>1 rare                                                                       | DPB1* 679:01e | -       | PFQG  | EEFA  | AAE   | ILEEK | M     | GGPM  |
| <i>Both sides of this epitype require RARE alleles, review results to confirm assignment.</i> |               |         |       |       |       |       |       |       |

OR

| EPITYPE                                                                                       | ALLELES       | P GROUP | HVR-A | HVR-B | HVR-C | HVR-D | HVR-E | HVR-F |
|-----------------------------------------------------------------------------------------------|---------------|---------|-------|-------|-------|-------|-------|-------|
| <b>EDP456</b><br>1 rare                                                                       | DPB1* 456:01e | -       | LFQG  | EEFA  | AAE   | ILEVK | M     | GGPM  |
| <b>EDP592</b><br>1 rare                                                                       | DPB1* 592:01e | -       | LFQG  | EEFA  | AAE   | ILEEK | M     | GGPR  |
| <i>Both sides of this epitype require RARE alleles, review results to confirm assignment.</i> |               |         |       |       |       |       |       |       |

OR

| EPITYPE                                                                                       | ALLELES       | P GROUP | HVR-A | HVR-B | HVR-C | HVR-D | HVR-E | HVR-F |
|-----------------------------------------------------------------------------------------------|---------------|---------|-------|-------|-------|-------|-------|-------|
| <b>EDP456</b><br>1 rare                                                                       | DPB1* 456:01e | -       | LFQG  | EEFA  | AAE   | ILEVK | M     | GGPM  |
| <b>EDP972</b><br>1 rare                                                                       | DPB1* 972:01e | -       | LFQG  | GEFV  | AAE   | ILEEK | M     | GGPM  |
| <i>Both sides of this epitype require RARE alleles, review results to confirm assignment.</i> |               |         |       |       |       |       |       |       |

OR

| EPITYPE | ALLELES | P GROUP | HVR-A | HVR-B | HVR-C | HVR-D | HVR-E | HVR-F |
|---------|---------|---------|-------|-------|-------|-------|-------|-------|
|---------|---------|---------|-------|-------|-------|-------|-------|-------|

|                                                                                               |               |   |      |      |     |       |   |      |
|-----------------------------------------------------------------------------------------------|---------------|---|------|------|-----|-------|---|------|
| <b>EDP456</b><br>1 rare                                                                       | DPB1* 456:01e | - | LFQG | EEFA | AAE | ILEVK | M | GGPM |
| <b>EDP642</b><br>1 rare                                                                       | DPB1* 642:01e | - | LFQG | EEFA | DAE | ILEEK | M | GGPM |
| <i>Both sides of this epitype require RARE alleles, review results to confirm assignment.</i> |               |   |      |      |     |       |   |      |

OR

| EPITYPE                                                                                       | ALLELES        | P GROUP | HVR-A | HVR-B | HVR-C | HVR-D | HVR-E | HVR-F |
|-----------------------------------------------------------------------------------------------|----------------|---------|-------|-------|-------|-------|-------|-------|
| <b>EDP456</b><br>1 rare                                                                       | DPB1* 456:01e  | -       | LFQG  | EEFA  | AAE   | ILEVK | M     | GGPM  |
| <b>EDP1081</b><br>1 rare                                                                      | DPB1* 1081:01e | -       | LFQG  | EEFA  | AAE   | VLEEK | M     | GGPM  |
| <i>Both sides of this epitype require RARE alleles, review results to confirm assignment.</i> |                |         |       |       |       |       |       |       |

OR

| EPITYPE                                                                                       | ALLELES         | P GROUP | HVR-A | HVR-B | HVR-C | HVR-D | HVR-E | HVR-F |
|-----------------------------------------------------------------------------------------------|-----------------|---------|-------|-------|-------|-------|-------|-------|
| <b>EDP456</b><br>1 rare                                                                       | DPB1* 456:01e   | -       | LFQG  | EEFA  | AAE   | ILEVK | M     | GGPM  |
| <b>EDP1135</b><br>1 rare                                                                      | DPB1* 1135:01Ne | -       | LFQG  | EEFA  | AAE   | ILGGE | D     | GRAH  |
| <i>Both sides of this epitype require RARE alleles, review results to confirm assignment.</i> |                 |         |       |       |       |       |       |       |

OR

| EPITYPE                                                                                       | ALLELES       | P GROUP | HVR-A | HVR-B | HVR-C | HVR-D | HVR-E | HVR-F |
|-----------------------------------------------------------------------------------------------|---------------|---------|-------|-------|-------|-------|-------|-------|
| <b>EDP456</b><br>1 rare                                                                       | DPB1* 456:01e | -       | LFQG  | EEFA  | AAE   | ILEVK | M     | GGPM  |
| <b>EDP687</b><br>1 rare                                                                       | DPB1* 687:01e | -       | LFQL  | EEFA  | AAE   | ILEEK | M     | GGPM  |
| <i>Both sides of this epitype require RARE alleles, review results to confirm assignment.</i> |               |         |       |       |       |       |       |       |

OR

| EPITYPE | ALLELES | P GROUP | HVR-A | HVR-B | HVR-C | HVR-D | HVR-E | HVR-F |
|---------|---------|---------|-------|-------|-------|-------|-------|-------|
|---------|---------|---------|-------|-------|-------|-------|-------|-------|

|                                                                                               |               |   |      |      |     |       |   |      |
|-----------------------------------------------------------------------------------------------|---------------|---|------|------|-----|-------|---|------|
| <b>EDP427</b><br>1 rare                                                                       | DPB1* 427:01e | - | LFQG | EEFA | ATE | ILEEK | M | GGPM |
| <b>EDP456</b><br>1 rare                                                                       | DPB1* 456:01e | - | LFQG | EEFA | AAE | ILEVK | M | GGPM |
| <i>Both sides of this epitype require RARE alleles, review results to confirm assignment.</i> |               |   |      |      |     |       |   |      |

OR

| EPITYPE                                                                                       | ALLELES        | P GROUP | HVR-A | HVR-B | HVR-C | HVR-D | HVR-E | HVR-F |
|-----------------------------------------------------------------------------------------------|----------------|---------|-------|-------|-------|-------|-------|-------|
| <b>EDP456</b><br>1 rare                                                                       | DPB1* 456:01e  | -       | LFQG  | EEFA  | AAE   | ILEVK | M     | GGPM  |
| <b>EDP867</b><br>1 rare                                                                       | DPB1* 867:01Ne | -       | LFQG  | EEFA  | CCG   | HPGGE | D     | GRAH  |
| <i>Both sides of this epitype require RARE alleles, review results to confirm assignment.</i> |                |         |       |       |       |       |       |       |

OR

| EPITYPE                                                                                       | ALLELES       | P GROUP | HVR-A | HVR-B | HVR-C | HVR-D | HVR-E | HVR-F |
|-----------------------------------------------------------------------------------------------|---------------|---------|-------|-------|-------|-------|-------|-------|
| <b>EDP177</b><br>1 rare                                                                       | DPB1* 177:01e | -       | LFQG  | EEFA  | AAE   | ILEEK | M     | SGPM  |
| <b>EDP456</b><br>1 rare                                                                       | DPB1* 456:01e | -       | LFQG  | EEFA  | AAE   | ILEVK | M     | GGPM  |
| <i>Both sides of this epitype require RARE alleles, review results to confirm assignment.</i> |               |         |       |       |       |       |       |       |

OR

| EPITYPE                                                                                       | ALLELES       | P GROUP | HVR-A | HVR-B | HVR-C | HVR-D | HVR-E | HVR-F |
|-----------------------------------------------------------------------------------------------|---------------|---------|-------|-------|-------|-------|-------|-------|
| <b>EDP456</b><br>1 rare                                                                       | DPB1* 456:01e | -       | LFQG  | EEFA  | AAE   | ILEVK | M     | GGPM  |
| <b>EDP747</b><br>1 rare                                                                       | DPB1* 747:01e | -       | VFQG  | EEFA  | AAE   | ILEEK | M     | GGPM  |
| <i>Both sides of this epitype require RARE alleles, review results to confirm assignment.</i> |               |         |       |       |       |       |       |       |

OR

| EPITYPE | ALLELES | P GROUP | HVR-A | HVR-B | HVR-C | HVR-D | HVR-E | HVR-F |
|---------|---------|---------|-------|-------|-------|-------|-------|-------|
|---------|---------|---------|-------|-------|-------|-------|-------|-------|

|                                                                                               |                |   |      |      |     |       |   |      |
|-----------------------------------------------------------------------------------------------|----------------|---|------|------|-----|-------|---|------|
| <b>EDP456</b><br>1 rare                                                                       | DPB1* 456:01e  | - | LFQG | EEFA | AAE | ILEVK | M | GGPM |
| <b>EDP1122</b><br>1 rare                                                                      | DPB1* 1122:01e | - | LFQG | EECA | AAE | ILEEK | M | GGPM |
| <i>Both sides of this epitope require RARE alleles, review results to confirm assignment.</i> |                |   |      |      |     |       |   |      |

OR

| EPITYPE                                                                                       | ALLELES       | P GROUP | HVR-A | HVR-B | HVR-C | HVR-D | HVR-E | HVR-F |
|-----------------------------------------------------------------------------------------------|---------------|---------|-------|-------|-------|-------|-------|-------|
| <b>EDP280</b><br>1 rare                                                                       | DPB1* 280:01e | -       | LFQG  | EEFA  | AAE   | ILEEK | M     | GAPM  |
| <b>EDP456</b><br>1 rare                                                                       | DPB1* 456:01e | -       | LFQG  | EEFA  | AAE   | ILEVK | M     | GGPM  |
| <i>Both sides of this epitope require RARE alleles, review results to confirm assignment.</i> |               |         |       |       |       |       |       |       |

OR

| EPITYPE                                                                                       | ALLELES       | P GROUP | HVR-A | HVR-B | HVR-C | HVR-D | HVR-E | HVR-F |
|-----------------------------------------------------------------------------------------------|---------------|---------|-------|-------|-------|-------|-------|-------|
| <b>EDP230</b><br>1 rare                                                                       | DPB1* 230:01e | -       | LFQG  | EEFA  | AAE   | ILEEK | M     | GWPM  |
| <b>EDP456</b><br>1 rare                                                                       | DPB1* 456:01e | -       | LFQG  | EEFA  | AAE   | ILEVK | M     | GGPM  |
| <i>Both sides of this epitope require RARE alleles, review results to confirm assignment.</i> |               |         |       |       |       |       |       |       |

OR

| EPITYPE                                                                                       | ALLELES        | P GROUP | HVR-A | HVR-B | HVR-C | HVR-D | HVR-E | HVR-F |
|-----------------------------------------------------------------------------------------------|----------------|---------|-------|-------|-------|-------|-------|-------|
| <b>EDP456</b><br>1 rare                                                                       | DPB1* 456:01e  | -       | LFQG  | EEFA  | AAE   | ILEVK | M     | GGPM  |
| <b>EDP570</b><br>1 rare                                                                       | DPB1* 911:01Ne | -       | -     | -     | -     | -     | -     | -     |
| <i>Both sides of this epitope require RARE alleles, review results to confirm assignment.</i> |                |         |       |       |       |       |       |       |

OR

| EPITYPE | ALLELES | P GROUP | HVR-A | HVR-B | HVR-C | HVR-D | HVR-E | HVR-F |
|---------|---------|---------|-------|-------|-------|-------|-------|-------|
|         |         |         |       |       |       |       |       |       |

|                                                                                               |               |   |      |      |     |       |   |      |
|-----------------------------------------------------------------------------------------------|---------------|---|------|------|-----|-------|---|------|
| <b>EDP456</b><br>1 rare                                                                       | DPB1* 456:01e | - | LFQG | EEFA | AAE | ILEVK | M | GGPM |
| <b>EDP840</b><br>1 rare                                                                       | DPB1* 840:01e | - | IFQG | EEFA | AAE | ILEEK | M | GGPM |
| <i>Both sides of this epitype require RARE alleles, review results to confirm assignment.</i> |               |   |      |      |     |       |   |      |

OR

| EPITYPE                                                                                       | ALLELES        | P GROUP | HVR-A | HVR-B | HVR-C | HVR-D | HVR-E | HVR-F |
|-----------------------------------------------------------------------------------------------|----------------|---------|-------|-------|-------|-------|-------|-------|
| <b>EDP303</b><br>1 rare                                                                       | DPB1* 303:01e  | -       | LFQG  | EEFA  | AAE   | ILEER | M     | GGPM  |
| <b>EDP1097</b><br>1 rare                                                                      | DPB1* 1097:01e | -       | LFLG  | EEFA  | AAE   | ILEEK | M     | GGPM  |
| <i>Both sides of this epitype require RARE alleles, review results to confirm assignment.</i> |                |         |       |       |       |       |       |       |

OR

| EPITYPE                                                                                       | ALLELES        | P GROUP | HVR-A | HVR-B | HVR-C | HVR-D | HVR-E | HVR-F |
|-----------------------------------------------------------------------------------------------|----------------|---------|-------|-------|-------|-------|-------|-------|
| <b>EDP753</b><br>1 rare                                                                       | DPB1* 753:01e  | -       | FFQG  | EEFA  | AAE   | ILEEK | M     | GGPM  |
| <b>EDP1097</b><br>1 rare                                                                      | DPB1* 1097:01e | -       | LFLG  | EEFA  | AAE   | ILEEK | M     | GGPM  |
| <i>Both sides of this epitype require RARE alleles, review results to confirm assignment.</i> |                |         |       |       |       |       |       |       |

OR

| EPITYPE                                                                                       | ALLELES        | P GROUP | HVR-A | HVR-B | HVR-C | HVR-D | HVR-E | HVR-F |
|-----------------------------------------------------------------------------------------------|----------------|---------|-------|-------|-------|-------|-------|-------|
| <b>EDP934</b><br>1 rare                                                                       | DPB1* 934:01Qe | -       | LFQG  | EEFA  | AAE   | ILEEK | M     | GGPM  |
| <b>EDP1097</b><br>1 rare                                                                      | DPB1* 1097:01e | -       | LFLG  | EEFA  | AAE   | ILEEK | M     | GGPM  |
| <i>Both sides of this epitype require RARE alleles, review results to confirm assignment.</i> |                |         |       |       |       |       |       |       |

OR

| EPITYPE | ALLELES | P GROUP | HVR-A | HVR-B | HVR-C | HVR-D | HVR-E | HVR-F |
|---------|---------|---------|-------|-------|-------|-------|-------|-------|
|---------|---------|---------|-------|-------|-------|-------|-------|-------|

|                                                                                               |                |   |      |      |     |       |   |      |
|-----------------------------------------------------------------------------------------------|----------------|---|------|------|-----|-------|---|------|
| <b>EDP874</b><br>1 rare                                                                       | DPB1* 874:01Ne | - | LFQG | EEFA | AAE | ILEEK | C | -    |
| <b>EDP1097</b><br>1 rare                                                                      | DPB1* 1097:01e | - | LFLG | EEFA | AAE | ILEEK | M | GGPM |
| <i>Both sides of this epitype require RARE alleles, review results to confirm assignment.</i> |                |   |      |      |     |       |   |      |

OR

| EPITYPE                                                                                       | ALLELES        | P GROUP | HVR-A | HVR-B | HVR-C | HVR-D | HVR-E | HVR-F |
|-----------------------------------------------------------------------------------------------|----------------|---------|-------|-------|-------|-------|-------|-------|
| <b>EDP254</b><br>1 rare                                                                       | DPB1* 254:01e  | -       | LFQG  | EEFA  | AVE   | ILEEK | M     | GGPM  |
| <b>EDP1097</b><br>1 rare                                                                      | DPB1* 1097:01e | -       | LFLG  | EEFA  | AAE   | ILEEK | M     | GGPM  |
| <i>Both sides of this epitype require RARE alleles, review results to confirm assignment.</i> |                |         |       |       |       |       |       |       |

OR

| EPITYPE                                                                                       | ALLELES        | P GROUP | HVR-A | HVR-B | HVR-C | HVR-D | HVR-E | HVR-F |
|-----------------------------------------------------------------------------------------------|----------------|---------|-------|-------|-------|-------|-------|-------|
| <b>EDP454</b><br>1 rare                                                                       | DPB1* 454:01e  | -       | LFQG  | EEFA  | AAE   | ILEEK | M     | GEPM  |
| <b>EDP1097</b><br>1 rare                                                                      | DPB1* 1097:01e | -       | LFLG  | EEFA  | AAE   | ILEEK | M     | GGPM  |
| <i>Both sides of this epitype require RARE alleles, review results to confirm assignment.</i> |                |         |       |       |       |       |       |       |

OR

| EPITYPE                                                                                       | ALLELES        | P GROUP | HVR-A | HVR-B | HVR-C | HVR-D | HVR-E | HVR-F |
|-----------------------------------------------------------------------------------------------|----------------|---------|-------|-------|-------|-------|-------|-------|
| <b>EDP1046</b><br>1 rare                                                                      | DPB1* 1046:01e | -       | LFQG  | EEIA  | AAE   | ILEEK | M     | GGPM  |
| <b>EDP1097</b><br>1 rare                                                                      | DPB1* 1097:01e | -       | LFLG  | EEFA  | AAE   | ILEEK | M     | GGPM  |
| <i>Both sides of this epitype require RARE alleles, review results to confirm assignment.</i> |                |         |       |       |       |       |       |       |

OR

| EPITYPE | ALLELES | P GROUP | HVR-A | HVR-B | HVR-C | HVR-D | HVR-E | HVR-F |
|---------|---------|---------|-------|-------|-------|-------|-------|-------|
|---------|---------|---------|-------|-------|-------|-------|-------|-------|

|                                                                                               |                |   |      |      |     |       |   |      |
|-----------------------------------------------------------------------------------------------|----------------|---|------|------|-----|-------|---|------|
| <b>EDP921</b><br>1 rare                                                                       | DPB1* 921:01e  | - | LFQG | GEFA | AAE | ILEEK | M | GGPM |
| <b>EDP1097</b><br>1 rare                                                                      | DPB1* 1097:01e | - | LFLG | EEFA | AAE | ILEEK | M | GGPM |
| <i>Both sides of this epitope require RARE alleles, review results to confirm assignment.</i> |                |   |      |      |     |       |   |      |

OR

| EPITYPE                                                                                       | ALLELES        | P GROUP | HVR-A | HVR-B | HVR-C | HVR-D | HVR-E | HVR-F |
|-----------------------------------------------------------------------------------------------|----------------|---------|-------|-------|-------|-------|-------|-------|
| <b>EDP871</b><br>1 rare                                                                       | DPB1* 871:01Ne | -       | LFQG  | EEFA  | AAE   | HPGGE | D     | GRAH  |
| <b>EDP1097</b><br>1 rare                                                                      | DPB1* 1097:01e | -       | LFLG  | EEFA  | AAE   | ILEEK | M     | GGPM  |
| <i>Both sides of this epitope require RARE alleles, review results to confirm assignment.</i> |                |         |       |       |       |       |       |       |

OR

| EPITYPE                                                                                       | ALLELES        | P GROUP | HVR-A | HVR-B | HVR-C | HVR-D | HVR-E | HVR-F |
|-----------------------------------------------------------------------------------------------|----------------|---------|-------|-------|-------|-------|-------|-------|
| <b>EDP399</b><br>1 rare                                                                       | DPB1* 399:01e  | -       | LFQG  | EEFA  | AAE   | IVEEK | M     | GGPM  |
| <b>EDP1097</b><br>1 rare                                                                      | DPB1* 1097:01e | -       | LFLG  | EEFA  | AAE   | ILEEK | M     | GGPM  |
| <i>Both sides of this epitope require RARE alleles, review results to confirm assignment.</i> |                |         |       |       |       |       |       |       |

OR

| EPITYPE                                                                                       | ALLELES        | P GROUP | HVR-A | HVR-B | HVR-C | HVR-D | HVR-E | HVR-F |
|-----------------------------------------------------------------------------------------------|----------------|---------|-------|-------|-------|-------|-------|-------|
| <b>EDP319</b><br>1 rare                                                                       | DPB1* 319:01e  | -       | LFQG  | EEFA  | AAE   | IQEEK | M     | GGPM  |
| <b>EDP1097</b><br>1 rare                                                                      | DPB1* 1097:01e | -       | LFLG  | EEFA  | AAE   | ILEEK | M     | GGPM  |
| <i>Both sides of this epitope require RARE alleles, review results to confirm assignment.</i> |                |         |       |       |       |       |       |       |

OR

| EPITYPE | ALLELES | P GROUP | HVR-A | HVR-B | HVR-C | HVR-D | HVR-E | HVR-F |
|---------|---------|---------|-------|-------|-------|-------|-------|-------|
|---------|---------|---------|-------|-------|-------|-------|-------|-------|

|                                                                                               |                |   |      |      |     |       |   |      |
|-----------------------------------------------------------------------------------------------|----------------|---|------|------|-----|-------|---|------|
| <b>EDP179</b><br>1 rare                                                                       | DPB1* 179:01e  | - | LFQG | EEFA | AAE | LLEER | M | GGPM |
| <b>EDP1097</b><br>1 rare                                                                      | DPB1* 1097:01e | - | LFLG | EEFA | AAE | ILEEK | M | GGPM |
| <i>Both sides of this epitype require RARE alleles, review results to confirm assignment.</i> |                |   |      |      |     |       |   |      |

OR

| EPITYPE                                                                                       | ALLELES        | P GROUP | HVR-A | HVR-B | HVR-C | HVR-D | HVR-E | HVR-F |
|-----------------------------------------------------------------------------------------------|----------------|---------|-------|-------|-------|-------|-------|-------|
| <b>EDP679</b><br>1 rare                                                                       | DPB1* 679:01e  | -       | PFQG  | EEFA  | AAE   | ILEEK | M     | GGPM  |
| <b>EDP1097</b><br>1 rare                                                                      | DPB1* 1097:01e | -       | LFLG  | EEFA  | AAE   | ILEEK | M     | GGPM  |
| <i>Both sides of this epitype require RARE alleles, review results to confirm assignment.</i> |                |         |       |       |       |       |       |       |

OR

| EPITYPE                                                                                       | ALLELES        | P GROUP | HVR-A | HVR-B | HVR-C | HVR-D | HVR-E | HVR-F |
|-----------------------------------------------------------------------------------------------|----------------|---------|-------|-------|-------|-------|-------|-------|
| <b>EDP592</b><br>1 rare                                                                       | DPB1* 592:01e  | -       | LFQG  | EEFA  | AAE   | ILEEK | M     | GGPR  |
| <b>EDP1097</b><br>1 rare                                                                      | DPB1* 1097:01e | -       | LFLG  | EEFA  | AAE   | ILEEK | M     | GGPM  |
| <i>Both sides of this epitype require RARE alleles, review results to confirm assignment.</i> |                |         |       |       |       |       |       |       |

OR

| EPITYPE                                                                                       | ALLELES        | P GROUP | HVR-A | HVR-B | HVR-C | HVR-D | HVR-E | HVR-F |
|-----------------------------------------------------------------------------------------------|----------------|---------|-------|-------|-------|-------|-------|-------|
| <b>EDP972</b><br>1 rare                                                                       | DPB1* 972:01e  | -       | LFQG  | GEFV  | AAE   | ILEEK | M     | GGPM  |
| <b>EDP1097</b><br>1 rare                                                                      | DPB1* 1097:01e | -       | LFLG  | EEFA  | AAE   | ILEEK | M     | GGPM  |
| <i>Both sides of this epitype require RARE alleles, review results to confirm assignment.</i> |                |         |       |       |       |       |       |       |

OR

| EPITYPE | ALLELES | P GROUP | HVR-A | HVR-B | HVR-C | HVR-D | HVR-E | HVR-F |
|---------|---------|---------|-------|-------|-------|-------|-------|-------|
|---------|---------|---------|-------|-------|-------|-------|-------|-------|



|                                                                                               |                |   |      |      |     |       |   |      |
|-----------------------------------------------------------------------------------------------|----------------|---|------|------|-----|-------|---|------|
| <b>EDP642</b><br>1 rare                                                                       | DPB1* 642:01e  | - | LFQG | EEFA | DAE | ILEEK | M | GGPM |
| <b>EDP1097</b><br>1 rare                                                                      | DPB1* 1097:01e | - | LFLG | EEFA | AAE | ILEEK | M | GGPM |
| <i>Both sides of this epitype require RARE alleles, review results to confirm assignment.</i> |                |   |      |      |     |       |   |      |

OR

| EPITYPE                                                                                       | ALLELES        | P GROUP | HVR-A | HVR-B | HVR-C | HVR-D | HVR-E | HVR-F |
|-----------------------------------------------------------------------------------------------|----------------|---------|-------|-------|-------|-------|-------|-------|
| <b>EDP1081</b><br>1 rare                                                                      | DPB1* 1081:01e | -       | LFQG  | EEFA  | AAE   | VLEEK | M     | GGPM  |
| <b>EDP1097</b><br>1 rare                                                                      | DPB1* 1097:01e | -       | LFLG  | EEFA  | AAE   | ILEEK | M     | GGPM  |
| <i>Both sides of this epitype require RARE alleles, review results to confirm assignment.</i> |                |         |       |       |       |       |       |       |

OR

| EPITYPE                                                                                       | ALLELES         | P GROUP | HVR-A | HVR-B | HVR-C | HVR-D | HVR-E | HVR-F |
|-----------------------------------------------------------------------------------------------|-----------------|---------|-------|-------|-------|-------|-------|-------|
| <b>EDP1097</b><br>1 rare                                                                      | DPB1* 1097:01e  | -       | LFLG  | EEFA  | AAE   | ILEEK | M     | GGPM  |
| <b>EDP1135</b><br>1 rare                                                                      | DPB1* 1135:01Ne | -       | LFQG  | EEFA  | AAE   | ILGGE | D     | GRAH  |
| <i>Both sides of this epitype require RARE alleles, review results to confirm assignment.</i> |                 |         |       |       |       |       |       |       |

OR

| EPITYPE                                                                                       | ALLELES        | P GROUP | HVR-A | HVR-B | HVR-C | HVR-D | HVR-E | HVR-F |
|-----------------------------------------------------------------------------------------------|----------------|---------|-------|-------|-------|-------|-------|-------|
| <b>EDP687</b><br>1 rare                                                                       | DPB1* 687:01e  | -       | LFQL  | EEFA  | AAE   | ILEEK | M     | GGPM  |
| <b>EDP1097</b><br>1 rare                                                                      | DPB1* 1097:01e | -       | LFLG  | EEFA  | AAE   | ILEEK | M     | GGPM  |
| <i>Both sides of this epitype require RARE alleles, review results to confirm assignment.</i> |                |         |       |       |       |       |       |       |

OR

| EPITYPE | ALLELES | P GROUP | HVR-A | HVR-B | HVR-C | HVR-D | HVR-E | HVR-F |
|---------|---------|---------|-------|-------|-------|-------|-------|-------|
|---------|---------|---------|-------|-------|-------|-------|-------|-------|

|                                                                                               |                |   |      |      |     |       |   |      |
|-----------------------------------------------------------------------------------------------|----------------|---|------|------|-----|-------|---|------|
| <b>EDP427</b><br>1 rare                                                                       | DPB1* 427:01e  | - | LFGG | EEFA | ATE | ILEEK | M | GGPM |
| <b>EDP1097</b><br>1 rare                                                                      | DPB1* 1097:01e | - | LFLG | EEFA | AAE | ILEEK | M | GGPM |
| <i>Both sides of this epitope require RARE alleles, review results to confirm assignment.</i> |                |   |      |      |     |       |   |      |

OR

| EPITYPE                                                                                       | ALLELES        | P GROUP | HVR-A | HVR-B | HVR-C | HVR-D | HVR-E | HVR-F |
|-----------------------------------------------------------------------------------------------|----------------|---------|-------|-------|-------|-------|-------|-------|
| <b>EDP867</b><br>1 rare                                                                       | DPB1* 867:01Ne | -       | LFGG  | EEFA  | CCG   | HPGGE | D     | GRAH  |
| <b>EDP1097</b><br>1 rare                                                                      | DPB1* 1097:01e | -       | LFLG  | EEFA  | AAE   | ILEEK | M     | GGPM  |
| <i>Both sides of this epitope require RARE alleles, review results to confirm assignment.</i> |                |         |       |       |       |       |       |       |

OR

| EPITYPE                                                                                       | ALLELES        | P GROUP | HVR-A | HVR-B | HVR-C | HVR-D | HVR-E | HVR-F |
|-----------------------------------------------------------------------------------------------|----------------|---------|-------|-------|-------|-------|-------|-------|
| <b>EDP177</b><br>1 rare                                                                       | DPB1* 177:01e  | -       | LFGG  | EEFA  | AAE   | ILEEK | M     | SGPM  |
| <b>EDP1097</b><br>1 rare                                                                      | DPB1* 1097:01e | -       | LFLG  | EEFA  | AAE   | ILEEK | M     | GGPM  |
| <i>Both sides of this epitope require RARE alleles, review results to confirm assignment.</i> |                |         |       |       |       |       |       |       |

OR

| EPITYPE                                                                                       | ALLELES        | P GROUP | HVR-A | HVR-B | HVR-C | HVR-D | HVR-E | HVR-F |
|-----------------------------------------------------------------------------------------------|----------------|---------|-------|-------|-------|-------|-------|-------|
| <b>EDP747</b><br>1 rare                                                                       | DPB1* 747:01e  | -       | VFQG  | EEFA  | AAE   | ILEEK | M     | GGPM  |
| <b>EDP1097</b><br>1 rare                                                                      | DPB1* 1097:01e | -       | LFLG  | EEFA  | AAE   | ILEEK | M     | GGPM  |
| <i>Both sides of this epitope require RARE alleles, review results to confirm assignment.</i> |                |         |       |       |       |       |       |       |

OR

| EPITYPE | ALLELES | P GROUP | HVR-A | HVR-B | HVR-C | HVR-D | HVR-E | HVR-F |
|---------|---------|---------|-------|-------|-------|-------|-------|-------|
|---------|---------|---------|-------|-------|-------|-------|-------|-------|

|                                                                                               |                |   |      |      |     |       |   |      |
|-----------------------------------------------------------------------------------------------|----------------|---|------|------|-----|-------|---|------|
| <b>EDP1097</b><br>1 rare                                                                      | DPB1* 1097:01e | - | LFLG | EEFA | AAE | ILEEK | M | GGPM |
| <b>EDP1122</b><br>1 rare                                                                      | DPB1* 1122:01e | - | LFQG | EECA | AAE | ILEEK | M | GGPM |
| <i>Both sides of this epitope require RARE alleles, review results to confirm assignment.</i> |                |   |      |      |     |       |   |      |

OR

| EPITYPE                                                                                       | ALLELES        | P GROUP | HVR-A | HVR-B | HVR-C | HVR-D | HVR-E | HVR-F |
|-----------------------------------------------------------------------------------------------|----------------|---------|-------|-------|-------|-------|-------|-------|
| <b>EDP280</b><br>1 rare                                                                       | DPB1* 280:01e  | -       | LFQG  | EEFA  | AAE   | ILEEK | M     | GAPM  |
| <b>EDP1097</b><br>1 rare                                                                      | DPB1* 1097:01e | -       | LFLG  | EEFA  | AAE   | ILEEK | M     | GGPM  |
| <i>Both sides of this epitope require RARE alleles, review results to confirm assignment.</i> |                |         |       |       |       |       |       |       |

OR

| EPITYPE                                                                                       | ALLELES        | P GROUP | HVR-A | HVR-B | HVR-C | HVR-D | HVR-E | HVR-F |
|-----------------------------------------------------------------------------------------------|----------------|---------|-------|-------|-------|-------|-------|-------|
| <b>EDP230</b><br>1 rare                                                                       | DPB1* 230:01e  | -       | LFQG  | EEFA  | AAE   | ILEEK | M     | GWPM  |
| <b>EDP1097</b><br>1 rare                                                                      | DPB1* 1097:01e | -       | LFLG  | EEFA  | AAE   | ILEEK | M     | GGPM  |
| <i>Both sides of this epitope require RARE alleles, review results to confirm assignment.</i> |                |         |       |       |       |       |       |       |

OR

| EPITYPE                                                                                       | ALLELES        | P GROUP | HVR-A | HVR-B | HVR-C | HVR-D | HVR-E | HVR-F |
|-----------------------------------------------------------------------------------------------|----------------|---------|-------|-------|-------|-------|-------|-------|
| <b>EDP570</b><br>1 rare                                                                       | DPB1* 911:01Ne | -       | -     | -     | -     | -     | -     | -     |
| <b>EDP1097</b><br>1 rare                                                                      | DPB1* 1097:01e | -       | LFLG  | EEFA  | AAE   | ILEEK | M     | GGPM  |
| <i>Both sides of this epitope require RARE alleles, review results to confirm assignment.</i> |                |         |       |       |       |       |       |       |

OR

| EPITYPE | ALLELES | P GROUP | HVR-A | HVR-B | HVR-C | HVR-D | HVR-E | HVR-F |
|---------|---------|---------|-------|-------|-------|-------|-------|-------|
|---------|---------|---------|-------|-------|-------|-------|-------|-------|

|                                                                                               |                |   |      |      |     |       |   |      |
|-----------------------------------------------------------------------------------------------|----------------|---|------|------|-----|-------|---|------|
| <b>EDP840</b><br>1 rare                                                                       | DPB1* 840:01e  | - | IFQG | EEFA | AAE | ILEEK | M | GGPM |
| <b>EDP1097</b><br>1 rare                                                                      | DPB1* 1097:01e | - | LFLG | EEFA | AAE | ILEEK | M | GGPM |
| <i>Both sides of this epitype require RARE alleles, review results to confirm assignment.</i> |                |   |      |      |     |       |   |      |

OR

| EPITYPE                                                                                       | ALLELES       | P GROUP | HVR-A | HVR-B | HVR-C | HVR-D | HVR-E | HVR-F |
|-----------------------------------------------------------------------------------------------|---------------|---------|-------|-------|-------|-------|-------|-------|
| <b>EDP303</b><br>1 rare                                                                       | DPB1* 303:01e | -       | LFQG  | EEFA  | AAE   | ILEER | M     | GGPM  |
| <b>EDP753</b><br>1 rare                                                                       | DPB1* 753:01e | -       | FFQG  | EEFA  | AAE   | ILEEK | M     | GGPM  |
| <i>Both sides of this epitype require RARE alleles, review results to confirm assignment.</i> |               |         |       |       |       |       |       |       |

OR

| EPITYPE                                                                                       | ALLELES        | P GROUP | HVR-A | HVR-B | HVR-C | HVR-D | HVR-E | HVR-F |
|-----------------------------------------------------------------------------------------------|----------------|---------|-------|-------|-------|-------|-------|-------|
| <b>EDP303</b><br>1 rare                                                                       | DPB1* 303:01e  | -       | LFQG  | EEFA  | AAE   | ILEER | M     | GGPM  |
| <b>EDP934</b><br>1 rare                                                                       | DPB1* 934:01Qe | -       | LFQG  | EF.A  | AAE   | ILEEK | M     | GGPM  |
| <i>Both sides of this epitype require RARE alleles, review results to confirm assignment.</i> |                |         |       |       |       |       |       |       |

OR

| EPITYPE                                                                                       | ALLELES        | P GROUP | HVR-A | HVR-B | HVR-C | HVR-D | HVR-E | HVR-F |
|-----------------------------------------------------------------------------------------------|----------------|---------|-------|-------|-------|-------|-------|-------|
| <b>EDP303</b><br>1 rare                                                                       | DPB1* 303:01e  | -       | LFQG  | EEFA  | AAE   | ILEER | M     | GGPM  |
| <b>EDP874</b><br>1 rare                                                                       | DPB1* 874:01Ne | -       | LFQG  | EEFA  | AAE   | ILEEK | C     | -     |
| <i>Both sides of this epitype require RARE alleles, review results to confirm assignment.</i> |                |         |       |       |       |       |       |       |

OR

| EPITYPE | ALLELES | P GROUP | HVR-A | HVR-B | HVR-C | HVR-D | HVR-E | HVR-F |
|---------|---------|---------|-------|-------|-------|-------|-------|-------|
|---------|---------|---------|-------|-------|-------|-------|-------|-------|

|                                                                                               |               |   |      |      |     |       |   |      |
|-----------------------------------------------------------------------------------------------|---------------|---|------|------|-----|-------|---|------|
| <b>EDP254</b><br>1 rare                                                                       | DPB1* 254:01e | - | LFQG | EEFA | AVE | ILEEK | M | GGPM |
| <b>EDP303</b><br>1 rare                                                                       | DPB1* 303:01e | - | LFQG | EEFA | AAE | ILEER | M | GGPM |
| <i>Both sides of this epitope require RARE alleles, review results to confirm assignment.</i> |               |   |      |      |     |       |   |      |

OR

| EPITYPE                                                                                       | ALLELES       | P GROUP | HVR-A | HVR-B | HVR-C | HVR-D | HVR-E | HVR-F |
|-----------------------------------------------------------------------------------------------|---------------|---------|-------|-------|-------|-------|-------|-------|
| <b>EDP303</b><br>1 rare                                                                       | DPB1* 303:01e | -       | LFQG  | EEFA  | AAE   | ILEER | M     | GGPM  |
| <b>EDP454</b><br>1 rare                                                                       | DPB1* 454:01e | -       | LFQG  | EEFA  | AAE   | ILEEK | M     | GEPM  |
| <i>Both sides of this epitope require RARE alleles, review results to confirm assignment.</i> |               |         |       |       |       |       |       |       |

OR

| EPITYPE                                                                                       | ALLELES        | P GROUP | HVR-A | HVR-B | HVR-C | HVR-D | HVR-E | HVR-F |
|-----------------------------------------------------------------------------------------------|----------------|---------|-------|-------|-------|-------|-------|-------|
| <b>EDP303</b><br>1 rare                                                                       | DPB1* 303:01e  | -       | LFQG  | EEFA  | AAE   | ILEER | M     | GGPM  |
| <b>EDP1046</b><br>1 rare                                                                      | DPB1* 1046:01e | -       | LFQG  | EEIA  | AAE   | ILEEK | M     | GGPM  |
| <i>Both sides of this epitope require RARE alleles, review results to confirm assignment.</i> |                |         |       |       |       |       |       |       |

OR

| EPITYPE                                                                                       | ALLELES       | P GROUP | HVR-A | HVR-B | HVR-C | HVR-D | HVR-E | HVR-F |
|-----------------------------------------------------------------------------------------------|---------------|---------|-------|-------|-------|-------|-------|-------|
| <b>EDP303</b><br>1 rare                                                                       | DPB1* 303:01e | -       | LFQG  | EEFA  | AAE   | ILEER | M     | GGPM  |
| <b>EDP921</b><br>1 rare                                                                       | DPB1* 921:01e | -       | LFQG  | GEFA  | AAE   | ILEEK | M     | GGPM  |
| <i>Both sides of this epitope require RARE alleles, review results to confirm assignment.</i> |               |         |       |       |       |       |       |       |

OR

| EPITYPE | ALLELES | P GROUP | HVR-A | HVR-B | HVR-C | HVR-D | HVR-E | HVR-F |
|---------|---------|---------|-------|-------|-------|-------|-------|-------|
|---------|---------|---------|-------|-------|-------|-------|-------|-------|

|                                                                                               |                |   |      |      |     |       |   |      |
|-----------------------------------------------------------------------------------------------|----------------|---|------|------|-----|-------|---|------|
| <b>EDP303</b><br>1 rare                                                                       | DPB1* 303:01e  | - | LFQG | EEFA | AAE | ILEER | M | GGPM |
| <b>EDP871</b><br>1 rare                                                                       | DPB1* 871:01Ne | - | LFQG | EEFA | AAE | HPGGE | D | GRAH |
| <i>Both sides of this epitype require RARE alleles, review results to confirm assignment.</i> |                |   |      |      |     |       |   |      |

OR

| EPITYPE                                                                                       | ALLELES       | P GROUP | HVR-A | HVR-B | HVR-C | HVR-D | HVR-E | HVR-F |
|-----------------------------------------------------------------------------------------------|---------------|---------|-------|-------|-------|-------|-------|-------|
| <b>EDP303</b><br>1 rare                                                                       | DPB1* 303:01e | -       | LFQG  | EEFA  | AAE   | ILEER | M     | GGPM  |
| <b>EDP399</b><br>1 rare                                                                       | DPB1* 399:01e | -       | LFQG  | EEFA  | AAE   | IVEEK | M     | GGPM  |
| <i>Both sides of this epitype require RARE alleles, review results to confirm assignment.</i> |               |         |       |       |       |       |       |       |

OR

| EPITYPE                                                                                       | ALLELES       | P GROUP | HVR-A | HVR-B | HVR-C | HVR-D | HVR-E | HVR-F |
|-----------------------------------------------------------------------------------------------|---------------|---------|-------|-------|-------|-------|-------|-------|
| <b>EDP303</b><br>1 rare                                                                       | DPB1* 303:01e | -       | LFQG  | EEFA  | AAE   | ILEER | M     | GGPM  |
| <b>EDP319</b><br>1 rare                                                                       | DPB1* 319:01e | -       | LFQG  | EEFA  | AAE   | IQEEK | M     | GGPM  |
| <i>Both sides of this epitype require RARE alleles, review results to confirm assignment.</i> |               |         |       |       |       |       |       |       |

OR

| EPITYPE                                                                                       | ALLELES       | P GROUP | HVR-A | HVR-B | HVR-C | HVR-D | HVR-E | HVR-F |
|-----------------------------------------------------------------------------------------------|---------------|---------|-------|-------|-------|-------|-------|-------|
| <b>EDP179</b><br>1 rare                                                                       | DPB1* 179:01e | -       | LFQG  | EEFA  | AAE   | LLEER | M     | GGPM  |
| <b>EDP303</b><br>1 rare                                                                       | DPB1* 303:01e | -       | LFQG  | EEFA  | AAE   | ILEER | M     | GGPM  |
| <i>Both sides of this epitype require RARE alleles, review results to confirm assignment.</i> |               |         |       |       |       |       |       |       |

OR

| EPITYPE | ALLELES | P GROUP | HVR-A | HVR-B | HVR-C | HVR-D | HVR-E | HVR-F |
|---------|---------|---------|-------|-------|-------|-------|-------|-------|
|---------|---------|---------|-------|-------|-------|-------|-------|-------|

|                                                                                               |               |   |      |      |     |       |   |      |
|-----------------------------------------------------------------------------------------------|---------------|---|------|------|-----|-------|---|------|
| <b>EDP303</b><br>1 rare                                                                       | DPB1* 303:01e | - | LFQG | EEFA | AAE | ILEER | M | GGPM |
| <b>EDP679</b><br>1 rare                                                                       | DPB1* 679:01e | - | PFQG | EEFA | AAE | ILEEK | M | GGPM |
| <i>Both sides of this epitype require RARE alleles, review results to confirm assignment.</i> |               |   |      |      |     |       |   |      |

OR

| EPITYPE                                                                                       | ALLELES       | P GROUP | HVR-A | HVR-B | HVR-C | HVR-D | HVR-E | HVR-F |
|-----------------------------------------------------------------------------------------------|---------------|---------|-------|-------|-------|-------|-------|-------|
| <b>EDP303</b><br>1 rare                                                                       | DPB1* 303:01e | -       | LFQG  | EEFA  | AAE   | ILEER | M     | GGPM  |
| <b>EDP592</b><br>1 rare                                                                       | DPB1* 592:01e | -       | LFQG  | EEFA  | AAE   | ILEEK | M     | GGPR  |
| <i>Both sides of this epitype require RARE alleles, review results to confirm assignment.</i> |               |         |       |       |       |       |       |       |

OR

| EPITYPE                                                                                       | ALLELES       | P GROUP | HVR-A | HVR-B | HVR-C | HVR-D | HVR-E | HVR-F |
|-----------------------------------------------------------------------------------------------|---------------|---------|-------|-------|-------|-------|-------|-------|
| <b>EDP303</b><br>1 rare                                                                       | DPB1* 303:01e | -       | LFQG  | EEFA  | AAE   | ILEER | M     | GGPM  |
| <b>EDP972</b><br>1 rare                                                                       | DPB1* 972:01e | -       | LFQG  | GEFV  | AAE   | ILEEK | M     | GGPM  |
| <i>Both sides of this epitype require RARE alleles, review results to confirm assignment.</i> |               |         |       |       |       |       |       |       |

OR

| EPITYPE                                                                                       | ALLELES       | P GROUP | HVR-A | HVR-B | HVR-C | HVR-D | HVR-E | HVR-F |
|-----------------------------------------------------------------------------------------------|---------------|---------|-------|-------|-------|-------|-------|-------|
| <b>EDP303</b><br>1 rare                                                                       | DPB1* 303:01e | -       | LFQG  | EEFA  | AAE   | ILEER | M     | GGPM  |
| <b>EDP642</b><br>1 rare                                                                       | DPB1* 642:01e | -       | LFQG  | EEFA  | DAE   | ILEEK | M     | GGPM  |
| <i>Both sides of this epitype require RARE alleles, review results to confirm assignment.</i> |               |         |       |       |       |       |       |       |

OR

| EPITYPE | ALLELES | P GROUP | HVR-A | HVR-B | HVR-C | HVR-D | HVR-E | HVR-F |
|---------|---------|---------|-------|-------|-------|-------|-------|-------|
|---------|---------|---------|-------|-------|-------|-------|-------|-------|

|                                                                                               |                |   |      |      |     |       |   |      |
|-----------------------------------------------------------------------------------------------|----------------|---|------|------|-----|-------|---|------|
| <b>EDP303</b><br>1 rare                                                                       | DPB1* 303:01e  | - | LFQG | EEFA | AAE | ILEER | M | GGPM |
| <b>EDP1081</b><br>1 rare                                                                      | DPB1* 1081:01e | - | LFQG | EEFA | AAE | VLEEK | M | GGPM |
| <i>Both sides of this epitype require RARE alleles, review results to confirm assignment.</i> |                |   |      |      |     |       |   |      |

OR

| EPITYPE                                                                                       | ALLELES         | P GROUP | HVR-A | HVR-B | HVR-C | HVR-D | HVR-E | HVR-F |
|-----------------------------------------------------------------------------------------------|-----------------|---------|-------|-------|-------|-------|-------|-------|
| <b>EDP303</b><br>1 rare                                                                       | DPB1* 303:01e   | -       | LFQG  | EEFA  | AAE   | ILEER | M     | GGPM  |
| <b>EDP1135</b><br>1 rare                                                                      | DPB1* 1135:01Ne | -       | LFQG  | EEFA  | AAE   | ILGGE | D     | GRAH  |
| <i>Both sides of this epitype require RARE alleles, review results to confirm assignment.</i> |                 |         |       |       |       |       |       |       |

OR

| EPITYPE                                                                                       | ALLELES       | P GROUP | HVR-A | HVR-B | HVR-C | HVR-D | HVR-E | HVR-F |
|-----------------------------------------------------------------------------------------------|---------------|---------|-------|-------|-------|-------|-------|-------|
| <b>EDP303</b><br>1 rare                                                                       | DPB1* 303:01e | -       | LFQG  | EEFA  | AAE   | ILEER | M     | GGPM  |
| <b>EDP687</b><br>1 rare                                                                       | DPB1* 687:01e | -       | LFQL  | EEFA  | AAE   | ILEEK | M     | GGPM  |
| <i>Both sides of this epitype require RARE alleles, review results to confirm assignment.</i> |               |         |       |       |       |       |       |       |

OR

| EPITYPE                                                                                       | ALLELES       | P GROUP | HVR-A | HVR-B | HVR-C | HVR-D | HVR-E | HVR-F |
|-----------------------------------------------------------------------------------------------|---------------|---------|-------|-------|-------|-------|-------|-------|
| <b>EDP303</b><br>1 rare                                                                       | DPB1* 303:01e | -       | LFQG  | EEFA  | AAE   | ILEER | M     | GGPM  |
| <b>EDP427</b><br>1 rare                                                                       | DPB1* 427:01e | -       | LFQG  | EEFA  | ATE   | ILEEK | M     | GGPM  |
| <i>Both sides of this epitype require RARE alleles, review results to confirm assignment.</i> |               |         |       |       |       |       |       |       |

OR

| EPITYPE | ALLELES | P GROUP | HVR-A | HVR-B | HVR-C | HVR-D | HVR-E | HVR-F |
|---------|---------|---------|-------|-------|-------|-------|-------|-------|
|---------|---------|---------|-------|-------|-------|-------|-------|-------|



|                                                                                               |                |   |      |      |     |       |   |      |
|-----------------------------------------------------------------------------------------------|----------------|---|------|------|-----|-------|---|------|
| <b>EDP303</b><br>1 rare                                                                       | DPB1* 303:01e  | - | LFQG | EEFA | AAE | ILEER | M | GGPM |
| <b>EDP867</b><br>1 rare                                                                       | DPB1* 867:01Ne | - | LFQG | EEFA | CCG | HPGGE | D | GRAH |
| <i>Both sides of this epitype require RARE alleles, review results to confirm assignment.</i> |                |   |      |      |     |       |   |      |

OR

| EPITYPE                                                                                       | ALLELES       | P GROUP | HVR-A | HVR-B | HVR-C | HVR-D | HVR-E | HVR-F |
|-----------------------------------------------------------------------------------------------|---------------|---------|-------|-------|-------|-------|-------|-------|
| <b>EDP177</b><br>1 rare                                                                       | DPB1* 177:01e | -       | LFQG  | EEFA  | AAE   | ILEEK | M     | SGPM  |
| <b>EDP303</b><br>1 rare                                                                       | DPB1* 303:01e | -       | LFQG  | EEFA  | AAE   | ILEER | M     | GGPM  |
| <i>Both sides of this epitype require RARE alleles, review results to confirm assignment.</i> |               |         |       |       |       |       |       |       |

OR

| EPITYPE                                                                                       | ALLELES       | P GROUP | HVR-A | HVR-B | HVR-C | HVR-D | HVR-E | HVR-F |
|-----------------------------------------------------------------------------------------------|---------------|---------|-------|-------|-------|-------|-------|-------|
| <b>EDP303</b><br>1 rare                                                                       | DPB1* 303:01e | -       | LFQG  | EEFA  | AAE   | ILEER | M     | GGPM  |
| <b>EDP747</b><br>1 rare                                                                       | DPB1* 747:01e | -       | VFQG  | EEFA  | AAE   | ILEEK | M     | GGPM  |
| <i>Both sides of this epitype require RARE alleles, review results to confirm assignment.</i> |               |         |       |       |       |       |       |       |

OR

| EPITYPE                                                                                       | ALLELES        | P GROUP | HVR-A | HVR-B | HVR-C | HVR-D | HVR-E | HVR-F |
|-----------------------------------------------------------------------------------------------|----------------|---------|-------|-------|-------|-------|-------|-------|
| <b>EDP303</b><br>1 rare                                                                       | DPB1* 303:01e  | -       | LFQG  | EEFA  | AAE   | ILEER | M     | GGPM  |
| <b>EDP1122</b><br>1 rare                                                                      | DPB1* 1122:01e | -       | LFQG  | EECA  | AAE   | ILEEK | M     | GGPM  |
| <i>Both sides of this epitype require RARE alleles, review results to confirm assignment.</i> |                |         |       |       |       |       |       |       |

OR

| EPITYPE | ALLELES | P GROUP | HVR-A | HVR-B | HVR-C | HVR-D | HVR-E | HVR-F |
|---------|---------|---------|-------|-------|-------|-------|-------|-------|
|---------|---------|---------|-------|-------|-------|-------|-------|-------|

|                                                                                               |               |   |      |      |     |       |   |      |
|-----------------------------------------------------------------------------------------------|---------------|---|------|------|-----|-------|---|------|
| <b>EDP280</b><br>1 rare                                                                       | DPB1* 280:01e | - | LFQG | EEFA | AAE | ILEEK | M | GAPM |
| <b>EDP303</b><br>1 rare                                                                       | DPB1* 303:01e | - | LFQG | EEFA | AAE | ILEER | M | GGPM |
| <i>Both sides of this epitype require RARE alleles, review results to confirm assignment.</i> |               |   |      |      |     |       |   |      |

OR

| EPITYPE                                                                                       | ALLELES       | P GROUP | HVR-A | HVR-B | HVR-C | HVR-D | HVR-E | HVR-F |
|-----------------------------------------------------------------------------------------------|---------------|---------|-------|-------|-------|-------|-------|-------|
| <b>EDP230</b><br>1 rare                                                                       | DPB1* 230:01e | -       | LFQG  | EEFA  | AAE   | ILEEK | M     | GWPM  |
| <b>EDP303</b><br>1 rare                                                                       | DPB1* 303:01e | -       | LFQG  | EEFA  | AAE   | ILEER | M     | GGPM  |
| <i>Both sides of this epitype require RARE alleles, review results to confirm assignment.</i> |               |         |       |       |       |       |       |       |

OR

| EPITYPE                                                                                       | ALLELES        | P GROUP | HVR-A | HVR-B | HVR-C | HVR-D | HVR-E | HVR-F |
|-----------------------------------------------------------------------------------------------|----------------|---------|-------|-------|-------|-------|-------|-------|
| <b>EDP303</b><br>1 rare                                                                       | DPB1* 303:01e  | -       | LFQG  | EEFA  | AAE   | ILEER | M     | GGPM  |
| <b>EDP570</b><br>1 rare                                                                       | DPB1* 911:01Ne | -       | -     | -     | -     | -     | -     | -     |
| <i>Both sides of this epitype require RARE alleles, review results to confirm assignment.</i> |                |         |       |       |       |       |       |       |

OR

| EPITYPE                                                                                       | ALLELES       | P GROUP | HVR-A | HVR-B | HVR-C | HVR-D | HVR-E | HVR-F |
|-----------------------------------------------------------------------------------------------|---------------|---------|-------|-------|-------|-------|-------|-------|
| <b>EDP303</b><br>1 rare                                                                       | DPB1* 303:01e | -       | LFQG  | EEFA  | AAE   | ILEER | M     | GGPM  |
| <b>EDP840</b><br>1 rare                                                                       | DPB1* 840:01e | -       | IFQG  | EEFA  | AAE   | ILEEK | M     | GGPM  |
| <i>Both sides of this epitype require RARE alleles, review results to confirm assignment.</i> |               |         |       |       |       |       |       |       |

OR

| EPITYPE | ALLELES | P GROUP | HVR-A | HVR-B | HVR-C | HVR-D | HVR-E | HVR-F |
|---------|---------|---------|-------|-------|-------|-------|-------|-------|
|---------|---------|---------|-------|-------|-------|-------|-------|-------|

|                                                                                               |                |   |      |      |     |       |   |      |
|-----------------------------------------------------------------------------------------------|----------------|---|------|------|-----|-------|---|------|
| <b>EDP753</b><br>1 rare                                                                       | DPB1* 753:01e  | - | FFQG | EEFA | AAE | ILEEK | M | GGPM |
| <b>EDP934</b><br>1 rare                                                                       | DPB1* 934:01Qe | - | LFQG | EFA  | AAE | ILEEK | M | GGPM |
| <i>Both sides of this epitope require RARE alleles, review results to confirm assignment.</i> |                |   |      |      |     |       |   |      |

OR

| EPITYPE                                                                                       | ALLELES        | P GROUP | HVR-A | HVR-B | HVR-C | HVR-D | HVR-E | HVR-F |
|-----------------------------------------------------------------------------------------------|----------------|---------|-------|-------|-------|-------|-------|-------|
| <b>EDP753</b><br>1 rare                                                                       | DPB1* 753:01e  | -       | FFQG  | EEFA  | AAE   | ILEEK | M     | GGPM  |
| <b>EDP874</b><br>1 rare                                                                       | DPB1* 874:01Ne | -       | LFQG  | EEFA  | AAE   | ILEEK | C     | -     |
| <i>Both sides of this epitope require RARE alleles, review results to confirm assignment.</i> |                |         |       |       |       |       |       |       |

OR

| EPITYPE                                                                                       | ALLELES       | P GROUP | HVR-A | HVR-B | HVR-C | HVR-D | HVR-E | HVR-F |
|-----------------------------------------------------------------------------------------------|---------------|---------|-------|-------|-------|-------|-------|-------|
| <b>EDP254</b><br>1 rare                                                                       | DPB1* 254:01e | -       | LFQG  | EEFA  | AVE   | ILEEK | M     | GGPM  |
| <b>EDP753</b><br>1 rare                                                                       | DPB1* 753:01e | -       | FFQG  | EEFA  | AAE   | ILEEK | M     | GGPM  |
| <i>Both sides of this epitope require RARE alleles, review results to confirm assignment.</i> |               |         |       |       |       |       |       |       |

OR

| EPITYPE                                                                                       | ALLELES       | P GROUP | HVR-A | HVR-B | HVR-C | HVR-D | HVR-E | HVR-F |
|-----------------------------------------------------------------------------------------------|---------------|---------|-------|-------|-------|-------|-------|-------|
| <b>EDP454</b><br>1 rare                                                                       | DPB1* 454:01e | -       | LFQG  | EEFA  | AAE   | ILEEK | M     | GEPM  |
| <b>EDP753</b><br>1 rare                                                                       | DPB1* 753:01e | -       | FFQG  | EEFA  | AAE   | ILEEK | M     | GGPM  |
| <i>Both sides of this epitope require RARE alleles, review results to confirm assignment.</i> |               |         |       |       |       |       |       |       |

OR

| EPITYPE | ALLELES | P GROUP | HVR-A | HVR-B | HVR-C | HVR-D | HVR-E | HVR-F |
|---------|---------|---------|-------|-------|-------|-------|-------|-------|
|---------|---------|---------|-------|-------|-------|-------|-------|-------|

|                                                                                               |                |   |      |      |     |       |   |      |
|-----------------------------------------------------------------------------------------------|----------------|---|------|------|-----|-------|---|------|
| <b>EDP753</b><br>1 rare                                                                       | DPB1* 753:01e  | - | FFQG | EEFA | AAE | ILEEK | M | GGPM |
| <b>EDP1046</b><br>1 rare                                                                      | DPB1* 1046:01e | - | LFQG | EEIA | AAE | ILEEK | M | GGPM |
| <i>Both sides of this epitope require RARE alleles, review results to confirm assignment.</i> |                |   |      |      |     |       |   |      |

OR

| EPITYPE                                                                                       | ALLELES       | P GROUP | HVR-A | HVR-B | HVR-C | HVR-D | HVR-E | HVR-F |
|-----------------------------------------------------------------------------------------------|---------------|---------|-------|-------|-------|-------|-------|-------|
| <b>EDP753</b><br>1 rare                                                                       | DPB1* 753:01e | -       | FFQG  | EEFA  | AAE   | ILEEK | M     | GGPM  |
| <b>EDP921</b><br>1 rare                                                                       | DPB1* 921:01e | -       | LFQG  | GEFA  | AAE   | ILEEK | M     | GGPM  |
| <i>Both sides of this epitope require RARE alleles, review results to confirm assignment.</i> |               |         |       |       |       |       |       |       |

OR

| EPITYPE                                                                                       | ALLELES        | P GROUP | HVR-A | HVR-B | HVR-C | HVR-D | HVR-E | HVR-F |
|-----------------------------------------------------------------------------------------------|----------------|---------|-------|-------|-------|-------|-------|-------|
| <b>EDP753</b><br>1 rare                                                                       | DPB1* 753:01e  | -       | FFQG  | EEFA  | AAE   | ILEEK | M     | GGPM  |
| <b>EDP871</b><br>1 rare                                                                       | DPB1* 871:01Ne | -       | LFQG  | EEFA  | AAE   | HPGGE | D     | GRAH  |
| <i>Both sides of this epitope require RARE alleles, review results to confirm assignment.</i> |                |         |       |       |       |       |       |       |

OR

| EPITYPE                                                                                       | ALLELES       | P GROUP | HVR-A | HVR-B | HVR-C | HVR-D | HVR-E | HVR-F |
|-----------------------------------------------------------------------------------------------|---------------|---------|-------|-------|-------|-------|-------|-------|
| <b>EDP399</b><br>1 rare                                                                       | DPB1* 399:01e | -       | LFQG  | EEFA  | AAE   | IVEEK | M     | GGPM  |
| <b>EDP753</b><br>1 rare                                                                       | DPB1* 753:01e | -       | FFQG  | EEFA  | AAE   | ILEEK | M     | GGPM  |
| <i>Both sides of this epitope require RARE alleles, review results to confirm assignment.</i> |               |         |       |       |       |       |       |       |

OR

| EPITYPE | ALLELES | P GROUP | HVR-A | HVR-B | HVR-C | HVR-D | HVR-E | HVR-F |
|---------|---------|---------|-------|-------|-------|-------|-------|-------|
|---------|---------|---------|-------|-------|-------|-------|-------|-------|

|                                                                                               |               |   |      |      |     |       |   |      |
|-----------------------------------------------------------------------------------------------|---------------|---|------|------|-----|-------|---|------|
| <b>EDP319</b><br>1 rare                                                                       | DPB1* 319:01e | - | LFQG | EEFA | AAE | IQEEK | M | GGPM |
| <b>EDP753</b><br>1 rare                                                                       | DPB1* 753:01e | - | FFQG | EEFA | AAE | ILEEK | M | GGPM |
| <i>Both sides of this epitype require RARE alleles, review results to confirm assignment.</i> |               |   |      |      |     |       |   |      |

OR

| EPITYPE                                                                                       | ALLELES       | P GROUP | HVR-A | HVR-B | HVR-C | HVR-D | HVR-E | HVR-F |
|-----------------------------------------------------------------------------------------------|---------------|---------|-------|-------|-------|-------|-------|-------|
| <b>EDP179</b><br>1 rare                                                                       | DPB1* 179:01e | -       | LFQG  | EEFA  | AAE   | LLEER | M     | GGPM  |
| <b>EDP753</b><br>1 rare                                                                       | DPB1* 753:01e | -       | FFQG  | EEFA  | AAE   | ILEEK | M     | GGPM  |
| <i>Both sides of this epitype require RARE alleles, review results to confirm assignment.</i> |               |         |       |       |       |       |       |       |

OR

| EPITYPE                                                                                       | ALLELES       | P GROUP | HVR-A | HVR-B | HVR-C | HVR-D | HVR-E | HVR-F |
|-----------------------------------------------------------------------------------------------|---------------|---------|-------|-------|-------|-------|-------|-------|
| <b>EDP679</b><br>1 rare                                                                       | DPB1* 679:01e | -       | PFQG  | EEFA  | AAE   | ILEEK | M     | GGPM  |
| <b>EDP753</b><br>1 rare                                                                       | DPB1* 753:01e | -       | FFQG  | EEFA  | AAE   | ILEEK | M     | GGPM  |
| <i>Both sides of this epitype require RARE alleles, review results to confirm assignment.</i> |               |         |       |       |       |       |       |       |

OR

| EPITYPE                                                                                       | ALLELES       | P GROUP | HVR-A | HVR-B | HVR-C | HVR-D | HVR-E | HVR-F |
|-----------------------------------------------------------------------------------------------|---------------|---------|-------|-------|-------|-------|-------|-------|
| <b>EDP592</b><br>1 rare                                                                       | DPB1* 592:01e | -       | LFQG  | EEFA  | AAE   | ILEEK | M     | GGPR  |
| <b>EDP753</b><br>1 rare                                                                       | DPB1* 753:01e | -       | FFQG  | EEFA  | AAE   | ILEEK | M     | GGPM  |
| <i>Both sides of this epitype require RARE alleles, review results to confirm assignment.</i> |               |         |       |       |       |       |       |       |

OR

| EPITYPE | ALLELES | P GROUP | HVR-A | HVR-B | HVR-C | HVR-D | HVR-E | HVR-F |
|---------|---------|---------|-------|-------|-------|-------|-------|-------|
|---------|---------|---------|-------|-------|-------|-------|-------|-------|

|                                                                                               |               |   |      |      |     |       |   |      |
|-----------------------------------------------------------------------------------------------|---------------|---|------|------|-----|-------|---|------|
| <b>EDP753</b><br>1 rare                                                                       | DPB1* 753:01e | - | FFQG | EEFA | AAE | ILEEK | M | GGPM |
| <b>EDP972</b><br>1 rare                                                                       | DPB1* 972:01e | - | LFQG | GEFV | AAE | ILEEK | M | GGPM |
| <i>Both sides of this epitype require RARE alleles, review results to confirm assignment.</i> |               |   |      |      |     |       |   |      |

OR

| EPITYPE                                                                                       | ALLELES       | P GROUP | HVR-A | HVR-B | HVR-C | HVR-D | HVR-E | HVR-F |
|-----------------------------------------------------------------------------------------------|---------------|---------|-------|-------|-------|-------|-------|-------|
| <b>EDP642</b><br>1 rare                                                                       | DPB1* 642:01e | -       | LFQG  | EEFA  | DAE   | ILEEK | M     | GGPM  |
| <b>EDP753</b><br>1 rare                                                                       | DPB1* 753:01e | -       | FFQG  | EEFA  | AAE   | ILEEK | M     | GGPM  |
| <i>Both sides of this epitype require RARE alleles, review results to confirm assignment.</i> |               |         |       |       |       |       |       |       |

OR

| EPITYPE                                                                                       | ALLELES        | P GROUP | HVR-A | HVR-B | HVR-C | HVR-D | HVR-E | HVR-F |
|-----------------------------------------------------------------------------------------------|----------------|---------|-------|-------|-------|-------|-------|-------|
| <b>EDP753</b><br>1 rare                                                                       | DPB1* 753:01e  | -       | FFQG  | EEFA  | AAE   | ILEEK | M     | GGPM  |
| <b>EDP1081</b><br>1 rare                                                                      | DPB1* 1081:01e | -       | LFQG  | EEFA  | AAE   | VLEEK | M     | GGPM  |
| <i>Both sides of this epitype require RARE alleles, review results to confirm assignment.</i> |                |         |       |       |       |       |       |       |

OR

| EPITYPE                                                                                       | ALLELES         | P GROUP | HVR-A | HVR-B | HVR-C | HVR-D | HVR-E | HVR-F |
|-----------------------------------------------------------------------------------------------|-----------------|---------|-------|-------|-------|-------|-------|-------|
| <b>EDP753</b><br>1 rare                                                                       | DPB1* 753:01e   | -       | FFQG  | EEFA  | AAE   | ILEEK | M     | GGPM  |
| <b>EDP1135</b><br>1 rare                                                                      | DPB1* 1135:01Ne | -       | LFQG  | EEFA  | AAE   | ILGGE | D     | GRAH  |
| <i>Both sides of this epitype require RARE alleles, review results to confirm assignment.</i> |                 |         |       |       |       |       |       |       |

OR

| EPITYPE | ALLELES | P GROUP | HVR-A | HVR-B | HVR-C | HVR-D | HVR-E | HVR-F |
|---------|---------|---------|-------|-------|-------|-------|-------|-------|
|---------|---------|---------|-------|-------|-------|-------|-------|-------|

|                                                                                               |               |   |      |      |     |       |   |      |
|-----------------------------------------------------------------------------------------------|---------------|---|------|------|-----|-------|---|------|
| <b>EDP687</b><br>1 rare                                                                       | DPB1* 687:01e | - | LFQL | EEFA | AAE | ILEEK | M | GGPM |
| <b>EDP753</b><br>1 rare                                                                       | DPB1* 753:01e | - | FFQG | EEFA | AAE | ILEEK | M | GGPM |
| <i>Both sides of this epitope require RARE alleles, review results to confirm assignment.</i> |               |   |      |      |     |       |   |      |

OR

| EPITYPE                                                                                       | ALLELES       | P GROUP | HVR-A | HVR-B | HVR-C | HVR-D | HVR-E | HVR-F |
|-----------------------------------------------------------------------------------------------|---------------|---------|-------|-------|-------|-------|-------|-------|
| <b>EDP427</b><br>1 rare                                                                       | DPB1* 427:01e | -       | LFQG  | EEFA  | ATE   | ILEEK | M     | GGPM  |
| <b>EDP753</b><br>1 rare                                                                       | DPB1* 753:01e | -       | FFQG  | EEFA  | AAE   | ILEEK | M     | GGPM  |
| <i>Both sides of this epitope require RARE alleles, review results to confirm assignment.</i> |               |         |       |       |       |       |       |       |

OR

| EPITYPE                                                                                       | ALLELES        | P GROUP | HVR-A | HVR-B | HVR-C | HVR-D | HVR-E | HVR-F |
|-----------------------------------------------------------------------------------------------|----------------|---------|-------|-------|-------|-------|-------|-------|
| <b>EDP753</b><br>1 rare                                                                       | DPB1* 753:01e  | -       | FFQG  | EEFA  | AAE   | ILEEK | M     | GGPM  |
| <b>EDP867</b><br>1 rare                                                                       | DPB1* 867:01Ne | -       | LFQG  | EEFA  | CCG   | HPGGE | D     | GRAH  |
| <i>Both sides of this epitope require RARE alleles, review results to confirm assignment.</i> |                |         |       |       |       |       |       |       |

OR

| EPITYPE                                                                                       | ALLELES       | P GROUP | HVR-A | HVR-B | HVR-C | HVR-D | HVR-E | HVR-F |
|-----------------------------------------------------------------------------------------------|---------------|---------|-------|-------|-------|-------|-------|-------|
| <b>EDP177</b><br>1 rare                                                                       | DPB1* 177:01e | -       | LFQG  | EEFA  | AAE   | ILEEK | M     | SGPM  |
| <b>EDP753</b><br>1 rare                                                                       | DPB1* 753:01e | -       | FFQG  | EEFA  | AAE   | ILEEK | M     | GGPM  |
| <i>Both sides of this epitope require RARE alleles, review results to confirm assignment.</i> |               |         |       |       |       |       |       |       |

OR

| EPITYPE | ALLELES | P GROUP | HVR-A | HVR-B | HVR-C | HVR-D | HVR-E | HVR-F |
|---------|---------|---------|-------|-------|-------|-------|-------|-------|
|---------|---------|---------|-------|-------|-------|-------|-------|-------|

|                                                                                               |               |   |      |      |     |       |   |      |
|-----------------------------------------------------------------------------------------------|---------------|---|------|------|-----|-------|---|------|
| <b>EDP747</b><br>1 rare                                                                       | DPB1* 747:01e | - | VFQG | EEFA | AAE | ILEEK | M | GGPM |
| <b>EDP753</b><br>1 rare                                                                       | DPB1* 753:01e | - | FFQG | EEFA | AAE | ILEEK | M | GGPM |
| <i>Both sides of this epitype require RARE alleles, review results to confirm assignment.</i> |               |   |      |      |     |       |   |      |

OR

| EPITYPE                                                                                       | ALLELES        | P GROUP | HVR-A | HVR-B | HVR-C | HVR-D | HVR-E | HVR-F |
|-----------------------------------------------------------------------------------------------|----------------|---------|-------|-------|-------|-------|-------|-------|
| <b>EDP753</b><br>1 rare                                                                       | DPB1* 753:01e  | -       | FFQG  | EEFA  | AAE   | ILEEK | M     | GGPM  |
| <b>EDP1122</b><br>1 rare                                                                      | DPB1* 1122:01e | -       | LFQG  | EECA  | AAE   | ILEEK | M     | GGPM  |
| <i>Both sides of this epitype require RARE alleles, review results to confirm assignment.</i> |                |         |       |       |       |       |       |       |

OR

| EPITYPE                                                                                       | ALLELES       | P GROUP | HVR-A | HVR-B | HVR-C | HVR-D | HVR-E | HVR-F |
|-----------------------------------------------------------------------------------------------|---------------|---------|-------|-------|-------|-------|-------|-------|
| <b>EDP280</b><br>1 rare                                                                       | DPB1* 280:01e | -       | LFQG  | EEFA  | AAE   | ILEEK | M     | GAPM  |
| <b>EDP753</b><br>1 rare                                                                       | DPB1* 753:01e | -       | FFQG  | EEFA  | AAE   | ILEEK | M     | GGPM  |
| <i>Both sides of this epitype require RARE alleles, review results to confirm assignment.</i> |               |         |       |       |       |       |       |       |

OR

| EPITYPE                                                                                       | ALLELES       | P GROUP | HVR-A | HVR-B | HVR-C | HVR-D | HVR-E | HVR-F |
|-----------------------------------------------------------------------------------------------|---------------|---------|-------|-------|-------|-------|-------|-------|
| <b>EDP230</b><br>1 rare                                                                       | DPB1* 230:01e | -       | LFQG  | EEFA  | AAE   | ILEEK | M     | GWPM  |
| <b>EDP753</b><br>1 rare                                                                       | DPB1* 753:01e | -       | FFQG  | EEFA  | AAE   | ILEEK | M     | GGPM  |
| <i>Both sides of this epitype require RARE alleles, review results to confirm assignment.</i> |               |         |       |       |       |       |       |       |

OR

| EPITYPE | ALLELES | P GROUP | HVR-A | HVR-B | HVR-C | HVR-D | HVR-E | HVR-F |
|---------|---------|---------|-------|-------|-------|-------|-------|-------|
|---------|---------|---------|-------|-------|-------|-------|-------|-------|



|                                                                                               |                |   |      |      |     |       |   |      |
|-----------------------------------------------------------------------------------------------|----------------|---|------|------|-----|-------|---|------|
| <b>EDP570</b><br>1 rare                                                                       | DPB1* 911:01Ne | - | -    | -    | -   | -     | - | -    |
| <b>EDP753</b><br>1 rare                                                                       | DPB1* 753:01e  | - | FFQG | EEFA | AAE | ILEEK | M | GGPM |
| <i>Both sides of this epitope require RARE alleles, review results to confirm assignment.</i> |                |   |      |      |     |       |   |      |

OR

| EPITYPE                                                                                       | ALLELES       | P GROUP | HVR-A | HVR-B | HVR-C | HVR-D | HVR-E | HVR-F |
|-----------------------------------------------------------------------------------------------|---------------|---------|-------|-------|-------|-------|-------|-------|
| <b>EDP753</b><br>1 rare                                                                       | DPB1* 753:01e | -       | FFQG  | EEFA  | AAE   | ILEEK | M     | GGPM  |
| <b>EDP840</b><br>1 rare                                                                       | DPB1* 840:01e | -       | IFQG  | EEFA  | AAE   | ILEEK | M     | GGPM  |
| <i>Both sides of this epitope require RARE alleles, review results to confirm assignment.</i> |               |         |       |       |       |       |       |       |

OR

| EPITYPE                                                                                       | ALLELES        | P GROUP | HVR-A | HVR-B | HVR-C | HVR-D | HVR-E | HVR-F |
|-----------------------------------------------------------------------------------------------|----------------|---------|-------|-------|-------|-------|-------|-------|
| <b>EDP254</b><br>1 rare                                                                       | DPB1* 254:01e  | -       | LFQG  | EEFA  | AVE   | ILEEK | M     | GGPM  |
| <b>EDP934</b><br>1 rare                                                                       | DPB1* 934:01Qe | -       | LFQG  | EF.A  | AAE   | ILEEK | M     | GGPM  |
| <i>Both sides of this epitope require RARE alleles, review results to confirm assignment.</i> |                |         |       |       |       |       |       |       |

OR

| EPITYPE                                                                                       | ALLELES        | P GROUP | HVR-A | HVR-B | HVR-C | HVR-D | HVR-E | HVR-F |
|-----------------------------------------------------------------------------------------------|----------------|---------|-------|-------|-------|-------|-------|-------|
| <b>EDP454</b><br>1 rare                                                                       | DPB1* 454:01e  | -       | LFQG  | EEFA  | AAE   | ILEEK | M     | GEPM  |
| <b>EDP934</b><br>1 rare                                                                       | DPB1* 934:01Qe | -       | LFQG  | EF.A  | AAE   | ILEEK | M     | GGPM  |
| <i>Both sides of this epitope require RARE alleles, review results to confirm assignment.</i> |                |         |       |       |       |       |       |       |

OR

| EPITYPE | ALLELES | P GROUP | HVR-A | HVR-B | HVR-C | HVR-D | HVR-E | HVR-F |
|---------|---------|---------|-------|-------|-------|-------|-------|-------|
|---------|---------|---------|-------|-------|-------|-------|-------|-------|

|                                                                                               |                |   |      |      |     |       |   |      |
|-----------------------------------------------------------------------------------------------|----------------|---|------|------|-----|-------|---|------|
| <b>EDP934</b><br>1 rare                                                                       | DPB1* 934:01Qe | - | LFQG | EF.A | AAE | ILEEK | M | GGPM |
| <b>EDP1046</b><br>1 rare                                                                      | DPB1* 1046:01e | - | LFQG | EEIA | AAE | ILEEK | M | GGPM |
| <i>Both sides of this epitype require RARE alleles, review results to confirm assignment.</i> |                |   |      |      |     |       |   |      |

OR

| EPITYPE                                                                                       | ALLELES        | P GROUP | HVR-A | HVR-B | HVR-C | HVR-D | HVR-E | HVR-F |
|-----------------------------------------------------------------------------------------------|----------------|---------|-------|-------|-------|-------|-------|-------|
| <b>EDP921</b><br>1 rare                                                                       | DPB1* 921:01e  | -       | LFQG  | GEFA  | AAE   | ILEEK | M     | GGPM  |
| <b>EDP934</b><br>1 rare                                                                       | DPB1* 934:01Qe | -       | LFQG  | EF.A  | AAE   | ILEEK | M     | GGPM  |
| <i>Both sides of this epitype require RARE alleles, review results to confirm assignment.</i> |                |         |       |       |       |       |       |       |

OR

| EPITYPE                                                                                       | ALLELES        | P GROUP | HVR-A | HVR-B | HVR-C | HVR-D | HVR-E | HVR-F |
|-----------------------------------------------------------------------------------------------|----------------|---------|-------|-------|-------|-------|-------|-------|
| <b>EDP871</b><br>1 rare                                                                       | DPB1* 871:01Ne | -       | LFQG  | EEFA  | AAE   | HPGGE | D     | GRAH  |
| <b>EDP934</b><br>1 rare                                                                       | DPB1* 934:01Qe | -       | LFQG  | EF.A  | AAE   | ILEEK | M     | GGPM  |
| <i>Both sides of this epitype require RARE alleles, review results to confirm assignment.</i> |                |         |       |       |       |       |       |       |

OR

| EPITYPE                                                                                       | ALLELES        | P GROUP | HVR-A | HVR-B | HVR-C | HVR-D | HVR-E | HVR-F |
|-----------------------------------------------------------------------------------------------|----------------|---------|-------|-------|-------|-------|-------|-------|
| <b>EDP399</b><br>1 rare                                                                       | DPB1* 399:01e  | -       | LFQG  | EEFA  | AAE   | IVEEK | M     | GGPM  |
| <b>EDP934</b><br>1 rare                                                                       | DPB1* 934:01Qe | -       | LFQG  | EF.A  | AAE   | ILEEK | M     | GGPM  |
| <i>Both sides of this epitype require RARE alleles, review results to confirm assignment.</i> |                |         |       |       |       |       |       |       |

OR

| EPITYPE | ALLELES | P GROUP | HVR-A | HVR-B | HVR-C | HVR-D | HVR-E | HVR-F |
|---------|---------|---------|-------|-------|-------|-------|-------|-------|
|---------|---------|---------|-------|-------|-------|-------|-------|-------|

|                                                                                               |                |   |      |      |     |       |   |      |
|-----------------------------------------------------------------------------------------------|----------------|---|------|------|-----|-------|---|------|
| <b>EDP319</b><br>1 rare                                                                       | DPB1* 319:01e  | - | LFQG | EEFA | AAE | IQEEK | M | GGPM |
| <b>EDP934</b><br>1 rare                                                                       | DPB1* 934:01Qe | - | LFQG | EF.A | AAE | ILEEK | M | GGPM |
| <i>Both sides of this epitype require RARE alleles, review results to confirm assignment.</i> |                |   |      |      |     |       |   |      |

OR

| EPITYPE                                                                                       | ALLELES        | P GROUP | HVR-A | HVR-B | HVR-C | HVR-D | HVR-E | HVR-F |
|-----------------------------------------------------------------------------------------------|----------------|---------|-------|-------|-------|-------|-------|-------|
| <b>EDP179</b><br>1 rare                                                                       | DPB1* 179:01e  | -       | LFQG  | EEFA  | AAE   | LLEER | M     | GGPM  |
| <b>EDP934</b><br>1 rare                                                                       | DPB1* 934:01Qe | -       | LFQG  | EF.A  | AAE   | ILEEK | M     | GGPM  |
| <i>Both sides of this epitype require RARE alleles, review results to confirm assignment.</i> |                |         |       |       |       |       |       |       |

OR

| EPITYPE                                                                                       | ALLELES        | P GROUP | HVR-A | HVR-B | HVR-C | HVR-D | HVR-E | HVR-F |
|-----------------------------------------------------------------------------------------------|----------------|---------|-------|-------|-------|-------|-------|-------|
| <b>EDP679</b><br>1 rare                                                                       | DPB1* 679:01e  | -       | PFQG  | EEFA  | AAE   | ILEEK | M     | GGPM  |
| <b>EDP934</b><br>1 rare                                                                       | DPB1* 934:01Qe | -       | LFQG  | EF.A  | AAE   | ILEEK | M     | GGPM  |
| <i>Both sides of this epitype require RARE alleles, review results to confirm assignment.</i> |                |         |       |       |       |       |       |       |

OR

| EPITYPE                                                                                       | ALLELES        | P GROUP | HVR-A | HVR-B | HVR-C | HVR-D | HVR-E | HVR-F |
|-----------------------------------------------------------------------------------------------|----------------|---------|-------|-------|-------|-------|-------|-------|
| <b>EDP592</b><br>1 rare                                                                       | DPB1* 592:01e  | -       | LFQG  | EEFA  | AAE   | ILEEK | M     | GGPR  |
| <b>EDP934</b><br>1 rare                                                                       | DPB1* 934:01Qe | -       | LFQG  | EF.A  | AAE   | ILEEK | M     | GGPM  |
| <i>Both sides of this epitype require RARE alleles, review results to confirm assignment.</i> |                |         |       |       |       |       |       |       |

OR

| EPITYPE | ALLELES | P GROUP | HVR-A | HVR-B | HVR-C | HVR-D | HVR-E | HVR-F |
|---------|---------|---------|-------|-------|-------|-------|-------|-------|
|---------|---------|---------|-------|-------|-------|-------|-------|-------|

|                                                                                               |                |   |      |      |     |       |   |      |
|-----------------------------------------------------------------------------------------------|----------------|---|------|------|-----|-------|---|------|
| <b>EDP642</b><br>1 rare                                                                       | DPB1* 642:01e  | - | LFQG | EEFA | DAE | ILEEK | M | GGPM |
| <b>EDP934</b><br>1 rare                                                                       | DPB1* 934:01Qe | - | LFQG | EF.A | AAE | ILEEK | M | GGPM |
| <i>Both sides of this epitope require RARE alleles, review results to confirm assignment.</i> |                |   |      |      |     |       |   |      |

OR

| EPITYPE                                                                                       | ALLELES        | P GROUP | HVR-A | HVR-B | HVR-C | HVR-D | HVR-E | HVR-F |
|-----------------------------------------------------------------------------------------------|----------------|---------|-------|-------|-------|-------|-------|-------|
| <b>EDP934</b><br>1 rare                                                                       | DPB1* 934:01Qe | -       | LFQG  | EF.A  | AAE   | ILEEK | M     | GGPM  |
| <b>EDP1081</b><br>1 rare                                                                      | DPB1* 1081:01e | -       | LFQG  | EEFA  | AAE   | VLEEK | M     | GGPM  |
| <i>Both sides of this epitope require RARE alleles, review results to confirm assignment.</i> |                |         |       |       |       |       |       |       |

OR

| EPITYPE                                                                                       | ALLELES         | P GROUP | HVR-A | HVR-B | HVR-C | HVR-D | HVR-E | HVR-F |
|-----------------------------------------------------------------------------------------------|-----------------|---------|-------|-------|-------|-------|-------|-------|
| <b>EDP934</b><br>1 rare                                                                       | DPB1* 934:01Qe  | -       | LFQG  | EF.A  | AAE   | ILEEK | M     | GGPM  |
| <b>EDP1135</b><br>1 rare                                                                      | DPB1* 1135:01Ne | -       | LFQG  | EEFA  | AAE   | ILGGE | D     | GRAH  |
| <i>Both sides of this epitope require RARE alleles, review results to confirm assignment.</i> |                 |         |       |       |       |       |       |       |

OR

| EPITYPE                                                                                       | ALLELES        | P GROUP | HVR-A | HVR-B | HVR-C | HVR-D | HVR-E | HVR-F |
|-----------------------------------------------------------------------------------------------|----------------|---------|-------|-------|-------|-------|-------|-------|
| <b>EDP687</b><br>1 rare                                                                       | DPB1* 687:01e  | -       | LFQL  | EEFA  | AAE   | ILEEK | M     | GGPM  |
| <b>EDP934</b><br>1 rare                                                                       | DPB1* 934:01Qe | -       | LFQG  | EF.A  | AAE   | ILEEK | M     | GGPM  |
| <i>Both sides of this epitope require RARE alleles, review results to confirm assignment.</i> |                |         |       |       |       |       |       |       |

OR

| EPITYPE | ALLELES | P GROUP | HVR-A | HVR-B | HVR-C | HVR-D | HVR-E | HVR-F |
|---------|---------|---------|-------|-------|-------|-------|-------|-------|
|---------|---------|---------|-------|-------|-------|-------|-------|-------|

|                                                                                               |                |   |      |      |     |       |   |      |
|-----------------------------------------------------------------------------------------------|----------------|---|------|------|-----|-------|---|------|
| <b>EDP427</b><br>1 rare                                                                       | DPB1* 427:01e  | - | LFQG | EEFA | ATE | ILEEK | M | GGPM |
| <b>EDP934</b><br>1 rare                                                                       | DPB1* 934:01Qe | - | LFQG | EF.A | AAE | ILEEK | M | GGPM |
| <i>Both sides of this epitope require RARE alleles, review results to confirm assignment.</i> |                |   |      |      |     |       |   |      |

OR

| EPITYPE                                                                                       | ALLELES        | P GROUP | HVR-A | HVR-B | HVR-C | HVR-D | HVR-E | HVR-F |
|-----------------------------------------------------------------------------------------------|----------------|---------|-------|-------|-------|-------|-------|-------|
| <b>EDP867</b><br>1 rare                                                                       | DPB1* 867:01Ne | -       | LFQG  | EEFA  | CCG   | HPGGE | D     | GRAH  |
| <b>EDP934</b><br>1 rare                                                                       | DPB1* 934:01Qe | -       | LFQG  | EF.A  | AAE   | ILEEK | M     | GGPM  |
| <i>Both sides of this epitope require RARE alleles, review results to confirm assignment.</i> |                |         |       |       |       |       |       |       |

OR

| EPITYPE                                                                                       | ALLELES        | P GROUP | HVR-A | HVR-B | HVR-C | HVR-D | HVR-E | HVR-F |
|-----------------------------------------------------------------------------------------------|----------------|---------|-------|-------|-------|-------|-------|-------|
| <b>EDP177</b><br>1 rare                                                                       | DPB1* 177:01e  | -       | LFQG  | EEFA  | AAE   | ILEEK | M     | SGPM  |
| <b>EDP934</b><br>1 rare                                                                       | DPB1* 934:01Qe | -       | LFQG  | EF.A  | AAE   | ILEEK | M     | GGPM  |
| <i>Both sides of this epitope require RARE alleles, review results to confirm assignment.</i> |                |         |       |       |       |       |       |       |

OR

| EPITYPE                                                                                       | ALLELES        | P GROUP | HVR-A | HVR-B | HVR-C | HVR-D | HVR-E | HVR-F |
|-----------------------------------------------------------------------------------------------|----------------|---------|-------|-------|-------|-------|-------|-------|
| <b>EDP747</b><br>1 rare                                                                       | DPB1* 747:01e  | -       | VFQG  | EEFA  | AAE   | ILEEK | M     | GGPM  |
| <b>EDP934</b><br>1 rare                                                                       | DPB1* 934:01Qe | -       | LFQG  | EF.A  | AAE   | ILEEK | M     | GGPM  |
| <i>Both sides of this epitope require RARE alleles, review results to confirm assignment.</i> |                |         |       |       |       |       |       |       |

OR

| EPITYPE | ALLELES | P GROUP | HVR-A | HVR-B | HVR-C | HVR-D | HVR-E | HVR-F |
|---------|---------|---------|-------|-------|-------|-------|-------|-------|
|---------|---------|---------|-------|-------|-------|-------|-------|-------|

|                                                                                               |                |   |      |      |     |       |   |      |
|-----------------------------------------------------------------------------------------------|----------------|---|------|------|-----|-------|---|------|
| <b>EDP280</b><br>1 rare                                                                       | DPB1* 280:01e  | - | LFQG | EEFA | AAE | ILEEK | M | GAPM |
| <b>EDP934</b><br>1 rare                                                                       | DPB1* 934:01Qe | - | LFQG | EF.A | AAE | ILEEK | M | GGPM |
| <i>Both sides of this epitype require RARE alleles, review results to confirm assignment.</i> |                |   |      |      |     |       |   |      |

OR

| EPITYPE                                                                                       | ALLELES        | P GROUP | HVR-A | HVR-B | HVR-C | HVR-D | HVR-E | HVR-F |
|-----------------------------------------------------------------------------------------------|----------------|---------|-------|-------|-------|-------|-------|-------|
| <b>EDP230</b><br>1 rare                                                                       | DPB1* 230:01e  | -       | LFQG  | EEFA  | AAE   | ILEEK | M     | GWPM  |
| <b>EDP934</b><br>1 rare                                                                       | DPB1* 934:01Qe | -       | LFQG  | EF.A  | AAE   | ILEEK | M     | GGPM  |
| <i>Both sides of this epitype require RARE alleles, review results to confirm assignment.</i> |                |         |       |       |       |       |       |       |

OR

| EPITYPE                                                                                       | ALLELES        | P GROUP | HVR-A | HVR-B | HVR-C | HVR-D | HVR-E | HVR-F |
|-----------------------------------------------------------------------------------------------|----------------|---------|-------|-------|-------|-------|-------|-------|
| <b>EDP570</b><br>1 rare                                                                       | DPB1* 911:01Ne | -       | -     | -     | -     | -     | -     | -     |
| <b>EDP934</b><br>1 rare                                                                       | DPB1* 934:01Qe | -       | LFQG  | EF.A  | AAE   | ILEEK | M     | GGPM  |
| <i>Both sides of this epitype require RARE alleles, review results to confirm assignment.</i> |                |         |       |       |       |       |       |       |

OR

| EPITYPE                                                                                       | ALLELES        | P GROUP | HVR-A | HVR-B | HVR-C | HVR-D | HVR-E | HVR-F |
|-----------------------------------------------------------------------------------------------|----------------|---------|-------|-------|-------|-------|-------|-------|
| <b>EDP840</b><br>1 rare                                                                       | DPB1* 840:01e  | -       | IFQG  | EEFA  | AAE   | ILEEK | M     | GGPM  |
| <b>EDP934</b><br>1 rare                                                                       | DPB1* 934:01Qe | -       | LFQG  | EF.A  | AAE   | ILEEK | M     | GGPM  |
| <i>Both sides of this epitype require RARE alleles, review results to confirm assignment.</i> |                |         |       |       |       |       |       |       |

OR

| EPITYPE | ALLELES | P GROUP | HVR-A | HVR-B | HVR-C | HVR-D | HVR-E | HVR-F |
|---------|---------|---------|-------|-------|-------|-------|-------|-------|
|---------|---------|---------|-------|-------|-------|-------|-------|-------|

|                                                                                               |                |   |      |      |     |       |   |      |
|-----------------------------------------------------------------------------------------------|----------------|---|------|------|-----|-------|---|------|
| <b>EDP254</b><br>1 rare                                                                       | DPB1* 254:01e  | - | LFQG | EEFA | AVE | ILEEK | M | GGPM |
| <b>EDP874</b><br>1 rare                                                                       | DPB1* 874:01Ne | - | LFQG | EEFA | AAE | ILEEK | C | -    |
| <i>Both sides of this epitope require RARE alleles, review results to confirm assignment.</i> |                |   |      |      |     |       |   |      |

OR

| EPITYPE                                                                                       | ALLELES        | P GROUP | HVR-A | HVR-B | HVR-C | HVR-D | HVR-E | HVR-F |
|-----------------------------------------------------------------------------------------------|----------------|---------|-------|-------|-------|-------|-------|-------|
| <b>EDP454</b><br>1 rare                                                                       | DPB1* 454:01e  | -       | LFQG  | EEFA  | AAE   | ILEEK | M     | GEPM  |
| <b>EDP874</b><br>1 rare                                                                       | DPB1* 874:01Ne | -       | LFQG  | EEFA  | AAE   | ILEEK | C     | -     |
| <i>Both sides of this epitope require RARE alleles, review results to confirm assignment.</i> |                |         |       |       |       |       |       |       |

OR

| EPITYPE                                                                                       | ALLELES        | P GROUP | HVR-A | HVR-B | HVR-C | HVR-D | HVR-E | HVR-F |
|-----------------------------------------------------------------------------------------------|----------------|---------|-------|-------|-------|-------|-------|-------|
| <b>EDP874</b><br>1 rare                                                                       | DPB1* 874:01Ne | -       | LFQG  | EEFA  | AAE   | ILEEK | C     | -     |
| <b>EDP1046</b><br>1 rare                                                                      | DPB1* 1046:01e | -       | LFQG  | EEIA  | AAE   | ILEEK | M     | GGPM  |
| <i>Both sides of this epitope require RARE alleles, review results to confirm assignment.</i> |                |         |       |       |       |       |       |       |

OR

| EPITYPE                                                                                       | ALLELES        | P GROUP | HVR-A | HVR-B | HVR-C | HVR-D | HVR-E | HVR-F |
|-----------------------------------------------------------------------------------------------|----------------|---------|-------|-------|-------|-------|-------|-------|
| <b>EDP874</b><br>1 rare                                                                       | DPB1* 874:01Ne | -       | LFQG  | EEFA  | AAE   | ILEEK | C     | -     |
| <b>EDP921</b><br>1 rare                                                                       | DPB1* 921:01e  | -       | LFQG  | GEFA  | AAE   | ILEEK | M     | GGPM  |
| <i>Both sides of this epitope require RARE alleles, review results to confirm assignment.</i> |                |         |       |       |       |       |       |       |

OR

| EPITYPE | ALLELES | P GROUP | HVR-A | HVR-B | HVR-C | HVR-D | HVR-E | HVR-F |
|---------|---------|---------|-------|-------|-------|-------|-------|-------|
|---------|---------|---------|-------|-------|-------|-------|-------|-------|

|                                                                                               |                |   |      |      |     |       |   |      |
|-----------------------------------------------------------------------------------------------|----------------|---|------|------|-----|-------|---|------|
| <b>EDP871</b><br>1 rare                                                                       | DPB1* 871:01Ne | - | LFQG | EEFA | AAE | HPGGE | D | GRAH |
| <b>EDP874</b><br>1 rare                                                                       | DPB1* 874:01Ne | - | LFQG | EEFA | AAE | ILEEK | C | -    |
| <i>Both sides of this epitope require RARE alleles, review results to confirm assignment.</i> |                |   |      |      |     |       |   |      |

OR

| EPITYPE                                                                                       | ALLELES        | P GROUP | HVR-A | HVR-B | HVR-C | HVR-D | HVR-E | HVR-F |
|-----------------------------------------------------------------------------------------------|----------------|---------|-------|-------|-------|-------|-------|-------|
| <b>EDP399</b><br>1 rare                                                                       | DPB1* 399:01e  | -       | LFQG  | EEFA  | AAE   | IVEEK | M     | GGPM  |
| <b>EDP874</b><br>1 rare                                                                       | DPB1* 874:01Ne | -       | LFQG  | EEFA  | AAE   | ILEEK | C     | -     |
| <i>Both sides of this epitope require RARE alleles, review results to confirm assignment.</i> |                |         |       |       |       |       |       |       |

OR

| EPITYPE                                                                                       | ALLELES        | P GROUP | HVR-A | HVR-B | HVR-C | HVR-D | HVR-E | HVR-F |
|-----------------------------------------------------------------------------------------------|----------------|---------|-------|-------|-------|-------|-------|-------|
| <b>EDP319</b><br>1 rare                                                                       | DPB1* 319:01e  | -       | LFQG  | EEFA  | AAE   | IQEEK | M     | GGPM  |
| <b>EDP874</b><br>1 rare                                                                       | DPB1* 874:01Ne | -       | LFQG  | EEFA  | AAE   | ILEEK | C     | -     |
| <i>Both sides of this epitope require RARE alleles, review results to confirm assignment.</i> |                |         |       |       |       |       |       |       |

OR

| EPITYPE                                                                                       | ALLELES        | P GROUP | HVR-A | HVR-B | HVR-C | HVR-D | HVR-E | HVR-F |
|-----------------------------------------------------------------------------------------------|----------------|---------|-------|-------|-------|-------|-------|-------|
| <b>EDP179</b><br>1 rare                                                                       | DPB1* 179:01e  | -       | LFQG  | EEFA  | AAE   | LLEER | M     | GGPM  |
| <b>EDP874</b><br>1 rare                                                                       | DPB1* 874:01Ne | -       | LFQG  | EEFA  | AAE   | ILEEK | C     | -     |
| <i>Both sides of this epitope require RARE alleles, review results to confirm assignment.</i> |                |         |       |       |       |       |       |       |

OR

| EPITYPE | ALLELES | P GROUP | HVR-A | HVR-B | HVR-C | HVR-D | HVR-E | HVR-F |
|---------|---------|---------|-------|-------|-------|-------|-------|-------|
|---------|---------|---------|-------|-------|-------|-------|-------|-------|



|                                                                                               |                |   |      |      |     |       |   |      |
|-----------------------------------------------------------------------------------------------|----------------|---|------|------|-----|-------|---|------|
| <b>EDP679</b><br>1 rare                                                                       | DPB1* 679:01e  | - | PFQG | EEFA | AAE | ILEEK | M | GGPM |
| <b>EDP874</b><br>1 rare                                                                       | DPB1* 874:01Ne | - | LFQG | EEFA | AAE | ILEEK | C | -    |
| <i>Both sides of this epitope require RARE alleles, review results to confirm assignment.</i> |                |   |      |      |     |       |   |      |

OR

| EPITYPE                                                                                       | ALLELES        | P GROUP | HVR-A | HVR-B | HVR-C | HVR-D | HVR-E | HVR-F |
|-----------------------------------------------------------------------------------------------|----------------|---------|-------|-------|-------|-------|-------|-------|
| <b>EDP592</b><br>1 rare                                                                       | DPB1* 592:01e  | -       | LFQG  | EEFA  | AAE   | ILEEK | M     | GGPR  |
| <b>EDP874</b><br>1 rare                                                                       | DPB1* 874:01Ne | -       | LFQG  | EEFA  | AAE   | ILEEK | C     | -     |
| <i>Both sides of this epitope require RARE alleles, review results to confirm assignment.</i> |                |         |       |       |       |       |       |       |

OR

| EPITYPE                                                                                       | ALLELES        | P GROUP | HVR-A | HVR-B | HVR-C | HVR-D | HVR-E | HVR-F |
|-----------------------------------------------------------------------------------------------|----------------|---------|-------|-------|-------|-------|-------|-------|
| <b>EDP642</b><br>1 rare                                                                       | DPB1* 642:01e  | -       | LFQG  | EEFA  | DAE   | ILEEK | M     | GGPM  |
| <b>EDP874</b><br>1 rare                                                                       | DPB1* 874:01Ne | -       | LFQG  | EEFA  | AAE   | ILEEK | C     | -     |
| <i>Both sides of this epitope require RARE alleles, review results to confirm assignment.</i> |                |         |       |       |       |       |       |       |

OR

| EPITYPE                                                                                       | ALLELES        | P GROUP | HVR-A | HVR-B | HVR-C | HVR-D | HVR-E | HVR-F |
|-----------------------------------------------------------------------------------------------|----------------|---------|-------|-------|-------|-------|-------|-------|
| <b>EDP874</b><br>1 rare                                                                       | DPB1* 874:01Ne | -       | LFQG  | EEFA  | AAE   | ILEEK | C     | -     |
| <b>EDP1081</b><br>1 rare                                                                      | DPB1* 1081:01e | -       | LFQG  | EEFA  | AAE   | VLEEK | M     | GGPM  |
| <i>Both sides of this epitope require RARE alleles, review results to confirm assignment.</i> |                |         |       |       |       |       |       |       |

OR

| EPITYPE | ALLELES | P GROUP | HVR-A | HVR-B | HVR-C | HVR-D | HVR-E | HVR-F |
|---------|---------|---------|-------|-------|-------|-------|-------|-------|
|---------|---------|---------|-------|-------|-------|-------|-------|-------|

|                                                                                               |                 |   |      |      |     |       |   |      |
|-----------------------------------------------------------------------------------------------|-----------------|---|------|------|-----|-------|---|------|
| <b>EDP874</b><br>1 rare                                                                       | DPB1* 874:01Ne  | - | LFQG | EEFA | AAE | ILEEK | C | -    |
| <b>EDP1135</b><br>1 rare                                                                      | DPB1* 1135:01Ne | - | LFQG | EEFA | AAE | ILGGE | D | GRAH |
| <i>Both sides of this epitope require RARE alleles, review results to confirm assignment.</i> |                 |   |      |      |     |       |   |      |

OR

| EPITYPE                                                                                       | ALLELES        | P GROUP | HVR-A | HVR-B | HVR-C | HVR-D | HVR-E | HVR-F |
|-----------------------------------------------------------------------------------------------|----------------|---------|-------|-------|-------|-------|-------|-------|
| <b>EDP687</b><br>1 rare                                                                       | DPB1* 687:01e  | -       | LFQL  | EEFA  | AAE   | ILEEK | M     | GGPM  |
| <b>EDP874</b><br>1 rare                                                                       | DPB1* 874:01Ne | -       | LFQG  | EEFA  | AAE   | ILEEK | C     | -     |
| <i>Both sides of this epitope require RARE alleles, review results to confirm assignment.</i> |                |         |       |       |       |       |       |       |

OR

| EPITYPE                                                                                       | ALLELES        | P GROUP | HVR-A | HVR-B | HVR-C | HVR-D | HVR-E | HVR-F |
|-----------------------------------------------------------------------------------------------|----------------|---------|-------|-------|-------|-------|-------|-------|
| <b>EDP427</b><br>1 rare                                                                       | DPB1* 427:01e  | -       | LFQG  | EEFA  | ATE   | ILEEK | M     | GGPM  |
| <b>EDP874</b><br>1 rare                                                                       | DPB1* 874:01Ne | -       | LFQG  | EEFA  | AAE   | ILEEK | C     | -     |
| <i>Both sides of this epitope require RARE alleles, review results to confirm assignment.</i> |                |         |       |       |       |       |       |       |

OR

| EPITYPE                                                                                       | ALLELES        | P GROUP | HVR-A | HVR-B | HVR-C | HVR-D | HVR-E | HVR-F |
|-----------------------------------------------------------------------------------------------|----------------|---------|-------|-------|-------|-------|-------|-------|
| <b>EDP867</b><br>1 rare                                                                       | DPB1* 867:01Ne | -       | LFQG  | EEFA  | CCG   | HPGGE | D     | GRAH  |
| <b>EDP874</b><br>1 rare                                                                       | DPB1* 874:01Ne | -       | LFQG  | EEFA  | AAE   | ILEEK | C     | -     |
| <i>Both sides of this epitope require RARE alleles, review results to confirm assignment.</i> |                |         |       |       |       |       |       |       |

OR

| EPITYPE | ALLELES | P GROUP | HVR-A | HVR-B | HVR-C | HVR-D | HVR-E | HVR-F |
|---------|---------|---------|-------|-------|-------|-------|-------|-------|
|---------|---------|---------|-------|-------|-------|-------|-------|-------|

|                                                                                               |                |   |      |      |     |       |          |             |
|-----------------------------------------------------------------------------------------------|----------------|---|------|------|-----|-------|----------|-------------|
| <b>EDP177</b><br>1 rare                                                                       | DPB1* 177:01e  | - | LFQG | EEFA | AAE | ILEEK | M        | <b>SGPM</b> |
| <b>EDP874</b><br>1 rare                                                                       | DPB1* 874:01Ne | - | LFQG | EEFA | AAE | ILEEK | <b>C</b> | -           |
| <i>Both sides of this epitope require RARE alleles, review results to confirm assignment.</i> |                |   |      |      |     |       |          |             |

OR

| EPITYPE                                                                                       | ALLELES        | P GROUP | HVR-A       | HVR-B | HVR-C | HVR-D | HVR-E    | HVR-F |
|-----------------------------------------------------------------------------------------------|----------------|---------|-------------|-------|-------|-------|----------|-------|
| <b>EDP747</b><br>1 rare                                                                       | DPB1* 747:01e  | -       | <b>VFQG</b> | EEFA  | AAE   | ILEEK | M        | GGPM  |
| <b>EDP874</b><br>1 rare                                                                       | DPB1* 874:01Ne | -       | LFQG        | EEFA  | AAE   | ILEEK | <b>C</b> | -     |
| <i>Both sides of this epitope require RARE alleles, review results to confirm assignment.</i> |                |         |             |       |       |       |          |       |

OR

| EPITYPE                                                                                       | ALLELES        | P GROUP | HVR-A | HVR-B | HVR-C | HVR-D | HVR-E    | HVR-F       |
|-----------------------------------------------------------------------------------------------|----------------|---------|-------|-------|-------|-------|----------|-------------|
| <b>EDP280</b><br>1 rare                                                                       | DPB1* 280:01e  | -       | LFQG  | EEFA  | AAE   | ILEEK | M        | <b>GAPM</b> |
| <b>EDP874</b><br>1 rare                                                                       | DPB1* 874:01Ne | -       | LFQG  | EEFA  | AAE   | ILEEK | <b>C</b> | -           |
| <i>Both sides of this epitope require RARE alleles, review results to confirm assignment.</i> |                |         |       |       |       |       |          |             |

OR

| EPITYPE                                                                                       | ALLELES        | P GROUP | HVR-A | HVR-B | HVR-C | HVR-D | HVR-E    | HVR-F       |
|-----------------------------------------------------------------------------------------------|----------------|---------|-------|-------|-------|-------|----------|-------------|
| <b>EDP230</b><br>1 rare                                                                       | DPB1* 230:01e  | -       | LFQG  | EEFA  | AAE   | ILEEK | M        | <b>GWPM</b> |
| <b>EDP874</b><br>1 rare                                                                       | DPB1* 874:01Ne | -       | LFQG  | EEFA  | AAE   | ILEEK | <b>C</b> | -           |
| <i>Both sides of this epitope require RARE alleles, review results to confirm assignment.</i> |                |         |       |       |       |       |          |             |

OR

| EPITYPE | ALLELES | P GROUP | HVR-A | HVR-B | HVR-C | HVR-D | HVR-E | HVR-F |
|---------|---------|---------|-------|-------|-------|-------|-------|-------|
|---------|---------|---------|-------|-------|-------|-------|-------|-------|

|                                                                                               |                |   |      |      |     |       |   |   |
|-----------------------------------------------------------------------------------------------|----------------|---|------|------|-----|-------|---|---|
| <b>EDP570</b><br>1 rare                                                                       | DPB1* 911:01Ne | - | -    | -    | -   | -     | - | - |
| <b>EDP874</b><br>1 rare                                                                       | DPB1* 874:01Ne | - | LFQG | EEFA | AAE | ILEEK | C | - |
| <i>Both sides of this epitype require RARE alleles, review results to confirm assignment.</i> |                |   |      |      |     |       |   |   |

OR

| EPITYPE                                                                                       | ALLELES        | P GROUP | HVR-A | HVR-B | HVR-C | HVR-D | HVR-E | HVR-F |
|-----------------------------------------------------------------------------------------------|----------------|---------|-------|-------|-------|-------|-------|-------|
| <b>EDP840</b><br>1 rare                                                                       | DPB1* 840:01e  | -       | IFQG  | EEFA  | AAE   | ILEEK | M     | GGPM  |
| <b>EDP874</b><br>1 rare                                                                       | DPB1* 874:01Ne | -       | LFQG  | EEFA  | AAE   | ILEEK | C     | -     |
| <i>Both sides of this epitype require RARE alleles, review results to confirm assignment.</i> |                |         |       |       |       |       |       |       |

OR

| EPITYPE                                                                                       | ALLELES       | P GROUP | HVR-A | HVR-B | HVR-C | HVR-D | HVR-E | HVR-F |
|-----------------------------------------------------------------------------------------------|---------------|---------|-------|-------|-------|-------|-------|-------|
| <b>EDP254</b><br>1 rare                                                                       | DPB1* 254:01e | -       | LFQG  | EEFA  | AVE   | ILEEK | M     | GGPM  |
| <b>EDP454</b><br>1 rare                                                                       | DPB1* 454:01e | -       | LFQG  | EEFA  | AAE   | ILEEK | M     | GEPM  |
| <i>Both sides of this epitype require RARE alleles, review results to confirm assignment.</i> |               |         |       |       |       |       |       |       |

OR

| EPITYPE                                                                                       | ALLELES        | P GROUP | HVR-A | HVR-B | HVR-C | HVR-D | HVR-E | HVR-F |
|-----------------------------------------------------------------------------------------------|----------------|---------|-------|-------|-------|-------|-------|-------|
| <b>EDP254</b><br>1 rare                                                                       | DPB1* 254:01e  | -       | LFQG  | EEFA  | AVE   | ILEEK | M     | GGPM  |
| <b>EDP1046</b><br>1 rare                                                                      | DPB1* 1046:01e | -       | LFQG  | EEIA  | AAE   | ILEEK | M     | GGPM  |
| <i>Both sides of this epitype require RARE alleles, review results to confirm assignment.</i> |                |         |       |       |       |       |       |       |

OR

| EPITYPE | ALLELES | P GROUP | HVR-A | HVR-B | HVR-C | HVR-D | HVR-E | HVR-F |
|---------|---------|---------|-------|-------|-------|-------|-------|-------|
|---------|---------|---------|-------|-------|-------|-------|-------|-------|

|                                                                                               |               |   |      |      |     |       |   |      |
|-----------------------------------------------------------------------------------------------|---------------|---|------|------|-----|-------|---|------|
| <b>EDP254</b><br>1 rare                                                                       | DPB1* 254:01e | - | LFQG | EEFA | AVE | ILEEK | M | GGPM |
| <b>EDP921</b><br>1 rare                                                                       | DPB1* 921:01e | - | LFQG | GEFA | AAE | ILEEK | M | GGPM |
| <i>Both sides of this epitype require RARE alleles, review results to confirm assignment.</i> |               |   |      |      |     |       |   |      |

OR

| EPITYPE                                                                                       | ALLELES        | P GROUP | HVR-A | HVR-B | HVR-C | HVR-D | HVR-E | HVR-F |
|-----------------------------------------------------------------------------------------------|----------------|---------|-------|-------|-------|-------|-------|-------|
| <b>EDP254</b><br>1 rare                                                                       | DPB1* 254:01e  | -       | LFQG  | EEFA  | AVE   | ILEEK | M     | GGPM  |
| <b>EDP871</b><br>1 rare                                                                       | DPB1* 871:01Ne | -       | LFQG  | EEFA  | AAE   | HPGGE | D     | GRAH  |
| <i>Both sides of this epitype require RARE alleles, review results to confirm assignment.</i> |                |         |       |       |       |       |       |       |

OR

| EPITYPE                                                                                       | ALLELES       | P GROUP | HVR-A | HVR-B | HVR-C | HVR-D | HVR-E | HVR-F |
|-----------------------------------------------------------------------------------------------|---------------|---------|-------|-------|-------|-------|-------|-------|
| <b>EDP254</b><br>1 rare                                                                       | DPB1* 254:01e | -       | LFQG  | EEFA  | AVE   | ILEEK | M     | GGPM  |
| <b>EDP399</b><br>1 rare                                                                       | DPB1* 399:01e | -       | LFQG  | EEFA  | AAE   | IVEEK | M     | GGPM  |
| <i>Both sides of this epitype require RARE alleles, review results to confirm assignment.</i> |               |         |       |       |       |       |       |       |

OR

| EPITYPE                                                                                       | ALLELES       | P GROUP | HVR-A | HVR-B | HVR-C | HVR-D | HVR-E | HVR-F |
|-----------------------------------------------------------------------------------------------|---------------|---------|-------|-------|-------|-------|-------|-------|
| <b>EDP254</b><br>1 rare                                                                       | DPB1* 254:01e | -       | LFQG  | EEFA  | AVE   | ILEEK | M     | GGPM  |
| <b>EDP319</b><br>1 rare                                                                       | DPB1* 319:01e | -       | LFQG  | EEFA  | AAE   | IQEEK | M     | GGPM  |
| <i>Both sides of this epitype require RARE alleles, review results to confirm assignment.</i> |               |         |       |       |       |       |       |       |

OR

| EPITYPE | ALLELES | P GROUP | HVR-A | HVR-B | HVR-C | HVR-D | HVR-E | HVR-F |
|---------|---------|---------|-------|-------|-------|-------|-------|-------|
|---------|---------|---------|-------|-------|-------|-------|-------|-------|

|                                                                                               |               |   |      |      |     |       |   |      |
|-----------------------------------------------------------------------------------------------|---------------|---|------|------|-----|-------|---|------|
| <b>EDP179</b><br>1 rare                                                                       | DPB1* 179:01e | - | LFQG | EEFA | AAE | LLEER | M | GGPM |
| <b>EDP254</b><br>1 rare                                                                       | DPB1* 254:01e | - | LFQG | EEFA | AVE | ILEEK | M | GGPM |
| <i>Both sides of this epitype require RARE alleles, review results to confirm assignment.</i> |               |   |      |      |     |       |   |      |

OR

| EPITYPE                                                                                       | ALLELES       | P GROUP | HVR-A | HVR-B | HVR-C | HVR-D | HVR-E | HVR-F |
|-----------------------------------------------------------------------------------------------|---------------|---------|-------|-------|-------|-------|-------|-------|
| <b>EDP254</b><br>1 rare                                                                       | DPB1* 254:01e | -       | LFQG  | EEFA  | AVE   | ILEEK | M     | GGPM  |
| <b>EDP679</b><br>1 rare                                                                       | DPB1* 679:01e | -       | PFQG  | EEFA  | AAE   | ILEEK | M     | GGPM  |
| <i>Both sides of this epitype require RARE alleles, review results to confirm assignment.</i> |               |         |       |       |       |       |       |       |

OR

| EPITYPE                                                                                       | ALLELES       | P GROUP | HVR-A | HVR-B | HVR-C | HVR-D | HVR-E | HVR-F |
|-----------------------------------------------------------------------------------------------|---------------|---------|-------|-------|-------|-------|-------|-------|
| <b>EDP254</b><br>1 rare                                                                       | DPB1* 254:01e | -       | LFQG  | EEFA  | AVE   | ILEEK | M     | GGPM  |
| <b>EDP592</b><br>1 rare                                                                       | DPB1* 592:01e | -       | LFQG  | EEFA  | AAE   | ILEEK | M     | GGPR  |
| <i>Both sides of this epitype require RARE alleles, review results to confirm assignment.</i> |               |         |       |       |       |       |       |       |

OR

| EPITYPE                                                                                       | ALLELES       | P GROUP | HVR-A | HVR-B | HVR-C | HVR-D | HVR-E | HVR-F |
|-----------------------------------------------------------------------------------------------|---------------|---------|-------|-------|-------|-------|-------|-------|
| <b>EDP254</b><br>1 rare                                                                       | DPB1* 254:01e | -       | LFQG  | EEFA  | AVE   | ILEEK | M     | GGPM  |
| <b>EDP972</b><br>1 rare                                                                       | DPB1* 972:01e | -       | LFQG  | GEFV  | AAE   | ILEEK | M     | GGPM  |
| <i>Both sides of this epitype require RARE alleles, review results to confirm assignment.</i> |               |         |       |       |       |       |       |       |

OR

| EPITYPE | ALLELES | P GROUP | HVR-A | HVR-B | HVR-C | HVR-D | HVR-E | HVR-F |
|---------|---------|---------|-------|-------|-------|-------|-------|-------|
|---------|---------|---------|-------|-------|-------|-------|-------|-------|

|                                                                                               |               |   |      |      |     |       |   |      |
|-----------------------------------------------------------------------------------------------|---------------|---|------|------|-----|-------|---|------|
| <b>EDP254</b><br>1 rare                                                                       | DPB1* 254:01e | - | LFQG | EEFA | AVE | ILEEK | M | GGPM |
| <b>EDP642</b><br>1 rare                                                                       | DPB1* 642:01e | - | LFQG | EEFA | DAE | ILEEK | M | GGPM |
| <i>Both sides of this epitype require RARE alleles, review results to confirm assignment.</i> |               |   |      |      |     |       |   |      |

OR

| EPITYPE                                                                                       | ALLELES        | P GROUP | HVR-A | HVR-B | HVR-C | HVR-D | HVR-E | HVR-F |
|-----------------------------------------------------------------------------------------------|----------------|---------|-------|-------|-------|-------|-------|-------|
| <b>EDP254</b><br>1 rare                                                                       | DPB1* 254:01e  | -       | LFQG  | EEFA  | AVE   | ILEEK | M     | GGPM  |
| <b>EDP1081</b><br>1 rare                                                                      | DPB1* 1081:01e | -       | LFQG  | EEFA  | AAE   | VLEEK | M     | GGPM  |
| <i>Both sides of this epitype require RARE alleles, review results to confirm assignment.</i> |                |         |       |       |       |       |       |       |

OR

| EPITYPE                                                                                       | ALLELES         | P GROUP | HVR-A | HVR-B | HVR-C | HVR-D | HVR-E | HVR-F |
|-----------------------------------------------------------------------------------------------|-----------------|---------|-------|-------|-------|-------|-------|-------|
| <b>EDP254</b><br>1 rare                                                                       | DPB1* 254:01e   | -       | LFQG  | EEFA  | AVE   | ILEEK | M     | GGPM  |
| <b>EDP1135</b><br>1 rare                                                                      | DPB1* 1135:01Ne | -       | LFQG  | EEFA  | AAE   | ILGGE | D     | GRAH  |
| <i>Both sides of this epitype require RARE alleles, review results to confirm assignment.</i> |                 |         |       |       |       |       |       |       |

OR

| EPITYPE                                                                                       | ALLELES       | P GROUP | HVR-A | HVR-B | HVR-C | HVR-D | HVR-E | HVR-F |
|-----------------------------------------------------------------------------------------------|---------------|---------|-------|-------|-------|-------|-------|-------|
| <b>EDP254</b><br>1 rare                                                                       | DPB1* 254:01e | -       | LFQG  | EEFA  | AVE   | ILEEK | M     | GGPM  |
| <b>EDP687</b><br>1 rare                                                                       | DPB1* 687:01e | -       | LFQL  | EEFA  | AAE   | ILEEK | M     | GGPM  |
| <i>Both sides of this epitype require RARE alleles, review results to confirm assignment.</i> |               |         |       |       |       |       |       |       |

OR

| EPITYPE | ALLELES | P GROUP | HVR-A | HVR-B | HVR-C | HVR-D | HVR-E | HVR-F |
|---------|---------|---------|-------|-------|-------|-------|-------|-------|
|---------|---------|---------|-------|-------|-------|-------|-------|-------|

|                                                                                               |               |   |      |      |     |       |   |      |
|-----------------------------------------------------------------------------------------------|---------------|---|------|------|-----|-------|---|------|
| <b>EDP254</b><br>1 rare                                                                       | DPB1* 254:01e | - | LFQG | EEFA | AVE | ILEEK | M | GGPM |
| <b>EDP427</b><br>1 rare                                                                       | DPB1* 427:01e | - | LFQG | EEFA | ATE | ILEEK | M | GGPM |
| <i>Both sides of this epitype require RARE alleles, review results to confirm assignment.</i> |               |   |      |      |     |       |   |      |

OR

| EPITYPE                                                                                       | ALLELES        | P GROUP | HVR-A | HVR-B | HVR-C | HVR-D | HVR-E | HVR-F |
|-----------------------------------------------------------------------------------------------|----------------|---------|-------|-------|-------|-------|-------|-------|
| <b>EDP254</b><br>1 rare                                                                       | DPB1* 254:01e  | -       | LFQG  | EEFA  | AVE   | ILEEK | M     | GGPM  |
| <b>EDP867</b><br>1 rare                                                                       | DPB1* 867:01Ne | -       | LFQG  | EEFA  | CCG   | HPGGE | D     | GRAH  |
| <i>Both sides of this epitype require RARE alleles, review results to confirm assignment.</i> |                |         |       |       |       |       |       |       |

OR

| EPITYPE                                                                                       | ALLELES       | P GROUP | HVR-A | HVR-B | HVR-C | HVR-D | HVR-E | HVR-F |
|-----------------------------------------------------------------------------------------------|---------------|---------|-------|-------|-------|-------|-------|-------|
| <b>EDP177</b><br>1 rare                                                                       | DPB1* 177:01e | -       | LFQG  | EEFA  | AAE   | ILEEK | M     | SGPM  |
| <b>EDP254</b><br>1 rare                                                                       | DPB1* 254:01e | -       | LFQG  | EEFA  | AVE   | ILEEK | M     | GGPM  |
| <i>Both sides of this epitype require RARE alleles, review results to confirm assignment.</i> |               |         |       |       |       |       |       |       |

OR

| EPITYPE                                                                                       | ALLELES       | P GROUP | HVR-A | HVR-B | HVR-C | HVR-D | HVR-E | HVR-F |
|-----------------------------------------------------------------------------------------------|---------------|---------|-------|-------|-------|-------|-------|-------|
| <b>EDP254</b><br>1 rare                                                                       | DPB1* 254:01e | -       | LFQG  | EEFA  | AVE   | ILEEK | M     | GGPM  |
| <b>EDP747</b><br>1 rare                                                                       | DPB1* 747:01e | -       | VFQG  | EEFA  | AAE   | ILEEK | M     | GGPM  |
| <i>Both sides of this epitype require RARE alleles, review results to confirm assignment.</i> |               |         |       |       |       |       |       |       |

OR

| EPITYPE | ALLELES | P GROUP | HVR-A | HVR-B | HVR-C | HVR-D | HVR-E | HVR-F |
|---------|---------|---------|-------|-------|-------|-------|-------|-------|
|---------|---------|---------|-------|-------|-------|-------|-------|-------|



|                                                                                               |                |   |      |      |     |       |   |      |
|-----------------------------------------------------------------------------------------------|----------------|---|------|------|-----|-------|---|------|
| <b>EDP254</b><br>1 rare                                                                       | DPB1* 254:01e  | - | LFQG | EEFA | AVE | ILEEK | M | GGPM |
| <b>EDP1122</b><br>1 rare                                                                      | DPB1* 1122:01e | - | LFQG | EECA | AAE | ILEEK | M | GGPM |
| <i>Both sides of this epitype require RARE alleles, review results to confirm assignment.</i> |                |   |      |      |     |       |   |      |

OR

| EPITYPE                                                                                       | ALLELES       | P GROUP | HVR-A | HVR-B | HVR-C | HVR-D | HVR-E | HVR-F |
|-----------------------------------------------------------------------------------------------|---------------|---------|-------|-------|-------|-------|-------|-------|
| <b>EDP254</b><br>1 rare                                                                       | DPB1* 254:01e | -       | LFQG  | EEFA  | AVE   | ILEEK | M     | GGPM  |
| <b>EDP280</b><br>1 rare                                                                       | DPB1* 280:01e | -       | LFQG  | EEFA  | AAE   | ILEEK | M     | GAPM  |
| <i>Both sides of this epitype require RARE alleles, review results to confirm assignment.</i> |               |         |       |       |       |       |       |       |

OR

| EPITYPE                                                                                       | ALLELES       | P GROUP | HVR-A | HVR-B | HVR-C | HVR-D | HVR-E | HVR-F |
|-----------------------------------------------------------------------------------------------|---------------|---------|-------|-------|-------|-------|-------|-------|
| <b>EDP230</b><br>1 rare                                                                       | DPB1* 230:01e | -       | LFQG  | EEFA  | AAE   | ILEEK | M     | GWPM  |
| <b>EDP254</b><br>1 rare                                                                       | DPB1* 254:01e | -       | LFQG  | EEFA  | AVE   | ILEEK | M     | GGPM  |
| <i>Both sides of this epitype require RARE alleles, review results to confirm assignment.</i> |               |         |       |       |       |       |       |       |

OR

| EPITYPE                                                                                       | ALLELES        | P GROUP | HVR-A | HVR-B | HVR-C | HVR-D | HVR-E | HVR-F |
|-----------------------------------------------------------------------------------------------|----------------|---------|-------|-------|-------|-------|-------|-------|
| <b>EDP254</b><br>1 rare                                                                       | DPB1* 254:01e  | -       | LFQG  | EEFA  | AVE   | ILEEK | M     | GGPM  |
| <b>EDP570</b><br>1 rare                                                                       | DPB1* 911:01Ne | -       | -     | -     | -     | -     | -     | -     |
| <i>Both sides of this epitype require RARE alleles, review results to confirm assignment.</i> |                |         |       |       |       |       |       |       |

OR

| EPITYPE | ALLELES | P GROUP | HVR-A | HVR-B | HVR-C | HVR-D | HVR-E | HVR-F |
|---------|---------|---------|-------|-------|-------|-------|-------|-------|
|         |         |         |       |       |       |       |       |       |

|                                                                                               |               |   |      |      |     |       |   |      |
|-----------------------------------------------------------------------------------------------|---------------|---|------|------|-----|-------|---|------|
| <b>EDP254</b><br>1 rare                                                                       | DPB1* 254:01e | - | LFQG | EEFA | AVE | ILEEK | M | GGPM |
| <b>EDP840</b><br>1 rare                                                                       | DPB1* 840:01e | - | IFQG | EEFA | AAE | ILEEK | M | GGPM |
| <i>Both sides of this epitype require RARE alleles, review results to confirm assignment.</i> |               |   |      |      |     |       |   |      |

OR

| EPITYPE                                                                                       | ALLELES        | P GROUP | HVR-A | HVR-B | HVR-C | HVR-D | HVR-E | HVR-F |
|-----------------------------------------------------------------------------------------------|----------------|---------|-------|-------|-------|-------|-------|-------|
| <b>EDP454</b><br>1 rare                                                                       | DPB1* 454:01e  | -       | LFQG  | EEFA  | AAE   | ILEEK | M     | GEPM  |
| <b>EDP1046</b><br>1 rare                                                                      | DPB1* 1046:01e | -       | LFQG  | EEIA  | AAE   | ILEEK | M     | GGPM  |
| <i>Both sides of this epitype require RARE alleles, review results to confirm assignment.</i> |                |         |       |       |       |       |       |       |

OR

| EPITYPE                                                                                       | ALLELES       | P GROUP | HVR-A | HVR-B | HVR-C | HVR-D | HVR-E | HVR-F |
|-----------------------------------------------------------------------------------------------|---------------|---------|-------|-------|-------|-------|-------|-------|
| <b>EDP454</b><br>1 rare                                                                       | DPB1* 454:01e | -       | LFQG  | EEFA  | AAE   | ILEEK | M     | GEPM  |
| <b>EDP921</b><br>1 rare                                                                       | DPB1* 921:01e | -       | LFQG  | GEFA  | AAE   | ILEEK | M     | GGPM  |
| <i>Both sides of this epitype require RARE alleles, review results to confirm assignment.</i> |               |         |       |       |       |       |       |       |

OR

| EPITYPE                                                                                       | ALLELES        | P GROUP | HVR-A | HVR-B | HVR-C | HVR-D | HVR-E | HVR-F |
|-----------------------------------------------------------------------------------------------|----------------|---------|-------|-------|-------|-------|-------|-------|
| <b>EDP454</b><br>1 rare                                                                       | DPB1* 454:01e  | -       | LFQG  | EEFA  | AAE   | ILEEK | M     | GEPM  |
| <b>EDP871</b><br>1 rare                                                                       | DPB1* 871:01Ne | -       | LFQG  | EEFA  | AAE   | HPGGE | D     | GRAH  |
| <i>Both sides of this epitype require RARE alleles, review results to confirm assignment.</i> |                |         |       |       |       |       |       |       |

OR

| EPITYPE | ALLELES | P GROUP | HVR-A | HVR-B | HVR-C | HVR-D | HVR-E | HVR-F |
|---------|---------|---------|-------|-------|-------|-------|-------|-------|
|---------|---------|---------|-------|-------|-------|-------|-------|-------|

|                                                                                               |               |   |      |      |     |       |   |      |
|-----------------------------------------------------------------------------------------------|---------------|---|------|------|-----|-------|---|------|
| <b>EDP399</b><br>1 rare                                                                       | DPB1* 399:01e | - | LFQG | EEFA | AAE | IVEEK | M | GGPM |
| <b>EDP454</b><br>1 rare                                                                       | DPB1* 454:01e | - | LFQG | EEFA | AAE | ILEEK | M | GEPM |
| <i>Both sides of this epitype require RARE alleles, review results to confirm assignment.</i> |               |   |      |      |     |       |   |      |

OR

| EPITYPE                                                                                       | ALLELES       | P GROUP | HVR-A | HVR-B | HVR-C | HVR-D | HVR-E | HVR-F |
|-----------------------------------------------------------------------------------------------|---------------|---------|-------|-------|-------|-------|-------|-------|
| <b>EDP319</b><br>1 rare                                                                       | DPB1* 319:01e | -       | LFQG  | EEFA  | AAE   | IQEEK | M     | GGPM  |
| <b>EDP454</b><br>1 rare                                                                       | DPB1* 454:01e | -       | LFQG  | EEFA  | AAE   | ILEEK | M     | GEPM  |
| <i>Both sides of this epitype require RARE alleles, review results to confirm assignment.</i> |               |         |       |       |       |       |       |       |

OR

| EPITYPE                                                                                       | ALLELES       | P GROUP | HVR-A | HVR-B | HVR-C | HVR-D | HVR-E | HVR-F |
|-----------------------------------------------------------------------------------------------|---------------|---------|-------|-------|-------|-------|-------|-------|
| <b>EDP179</b><br>1 rare                                                                       | DPB1* 179:01e | -       | LFQG  | EEFA  | AAE   | LLEER | M     | GGPM  |
| <b>EDP454</b><br>1 rare                                                                       | DPB1* 454:01e | -       | LFQG  | EEFA  | AAE   | ILEEK | M     | GEPM  |
| <i>Both sides of this epitype require RARE alleles, review results to confirm assignment.</i> |               |         |       |       |       |       |       |       |

OR

| EPITYPE                                                                                       | ALLELES       | P GROUP | HVR-A | HVR-B | HVR-C | HVR-D | HVR-E | HVR-F |
|-----------------------------------------------------------------------------------------------|---------------|---------|-------|-------|-------|-------|-------|-------|
| <b>EDP454</b><br>1 rare                                                                       | DPB1* 454:01e | -       | LFQG  | EEFA  | AAE   | ILEEK | M     | GEPM  |
| <b>EDP679</b><br>1 rare                                                                       | DPB1* 679:01e | -       | PFQG  | EEFA  | AAE   | ILEEK | M     | GGPM  |
| <i>Both sides of this epitype require RARE alleles, review results to confirm assignment.</i> |               |         |       |       |       |       |       |       |

OR

| EPITYPE | ALLELES | P GROUP | HVR-A | HVR-B | HVR-C | HVR-D | HVR-E | HVR-F |
|---------|---------|---------|-------|-------|-------|-------|-------|-------|
|---------|---------|---------|-------|-------|-------|-------|-------|-------|

|                                                                                               |               |   |      |      |     |       |   |      |
|-----------------------------------------------------------------------------------------------|---------------|---|------|------|-----|-------|---|------|
| <b>EDP454</b><br>1 rare                                                                       | DPB1* 454:01e | - | LFQG | EEFA | AAE | ILEEK | M | GEPM |
| <b>EDP592</b><br>1 rare                                                                       | DPB1* 592:01e | - | LFQG | EEFA | AAE | ILEEK | M | GGPR |
| <i>Both sides of this epitype require RARE alleles, review results to confirm assignment.</i> |               |   |      |      |     |       |   |      |

OR

| EPITYPE                                                                                       | ALLELES       | P GROUP | HVR-A | HVR-B | HVR-C | HVR-D | HVR-E | HVR-F |
|-----------------------------------------------------------------------------------------------|---------------|---------|-------|-------|-------|-------|-------|-------|
| <b>EDP454</b><br>1 rare                                                                       | DPB1* 454:01e | -       | LFQG  | EEFA  | AAE   | ILEEK | M     | GEPM  |
| <b>EDP972</b><br>1 rare                                                                       | DPB1* 972:01e | -       | LFQG  | GEFV  | AAE   | ILEEK | M     | GGPM  |
| <i>Both sides of this epitype require RARE alleles, review results to confirm assignment.</i> |               |         |       |       |       |       |       |       |

OR

| EPITYPE                                                                                       | ALLELES       | P GROUP | HVR-A | HVR-B | HVR-C | HVR-D | HVR-E | HVR-F |
|-----------------------------------------------------------------------------------------------|---------------|---------|-------|-------|-------|-------|-------|-------|
| <b>EDP454</b><br>1 rare                                                                       | DPB1* 454:01e | -       | LFQG  | EEFA  | AAE   | ILEEK | M     | GEPM  |
| <b>EDP642</b><br>1 rare                                                                       | DPB1* 642:01e | -       | LFQG  | EEFA  | DAE   | ILEEK | M     | GGPM  |
| <i>Both sides of this epitype require RARE alleles, review results to confirm assignment.</i> |               |         |       |       |       |       |       |       |

OR

| EPITYPE                                                                                       | ALLELES        | P GROUP | HVR-A | HVR-B | HVR-C | HVR-D | HVR-E | HVR-F |
|-----------------------------------------------------------------------------------------------|----------------|---------|-------|-------|-------|-------|-------|-------|
| <b>EDP454</b><br>1 rare                                                                       | DPB1* 454:01e  | -       | LFQG  | EEFA  | AAE   | ILEEK | M     | GEPM  |
| <b>EDP1081</b><br>1 rare                                                                      | DPB1* 1081:01e | -       | LFQG  | EEFA  | AAE   | VLEEK | M     | GGPM  |
| <i>Both sides of this epitype require RARE alleles, review results to confirm assignment.</i> |                |         |       |       |       |       |       |       |

OR

| EPITYPE | ALLELES | P GROUP | HVR-A | HVR-B | HVR-C | HVR-D | HVR-E | HVR-F |
|---------|---------|---------|-------|-------|-------|-------|-------|-------|
|---------|---------|---------|-------|-------|-------|-------|-------|-------|

|                                                                                               |                 |   |      |      |     |              |          |             |
|-----------------------------------------------------------------------------------------------|-----------------|---|------|------|-----|--------------|----------|-------------|
| <b>EDP454</b><br>1 rare                                                                       | DPB1* 454:01e   | - | LFQG | EEFA | AAE | ILEEK        | M        | <b>GEPM</b> |
| <b>EDP1135</b><br>1 rare                                                                      | DPB1* 1135:01Ne | - | LFQG | EEFA | AAE | <b>ILGGE</b> | <b>D</b> | <b>GRAH</b> |
| <i>Both sides of this epitope require RARE alleles, review results to confirm assignment.</i> |                 |   |      |      |     |              |          |             |

OR

| EPITYPE                                                                                       | ALLELES       | P GROUP | HVR-A | HVR-B | HVR-C | HVR-D | HVR-E | HVR-F       |
|-----------------------------------------------------------------------------------------------|---------------|---------|-------|-------|-------|-------|-------|-------------|
| <b>EDP454</b><br>1 rare                                                                       | DPB1* 454:01e | -       | LFQG  | EEFA  | AAE   | ILEEK | M     | <b>GEPM</b> |
| <b>EDP687</b><br>1 rare                                                                       | DPB1* 687:01e | -       | LFQL  | EEFA  | AAE   | ILEEK | M     | <b>GGPM</b> |
| <i>Both sides of this epitope require RARE alleles, review results to confirm assignment.</i> |               |         |       |       |       |       |       |             |

OR

| EPITYPE                                                                                       | ALLELES       | P GROUP | HVR-A | HVR-B | HVR-C | HVR-D | HVR-E | HVR-F       |
|-----------------------------------------------------------------------------------------------|---------------|---------|-------|-------|-------|-------|-------|-------------|
| <b>EDP427</b><br>1 rare                                                                       | DPB1* 427:01e | -       | LFQG  | EEFA  | ATE   | ILEEK | M     | <b>GGPM</b> |
| <b>EDP454</b><br>1 rare                                                                       | DPB1* 454:01e | -       | LFQG  | EEFA  | AAE   | ILEEK | M     | <b>GEPM</b> |
| <i>Both sides of this epitope require RARE alleles, review results to confirm assignment.</i> |               |         |       |       |       |       |       |             |

OR

| EPITYPE                                                                                       | ALLELES        | P GROUP | HVR-A | HVR-B | HVR-C      | HVR-D        | HVR-E    | HVR-F       |
|-----------------------------------------------------------------------------------------------|----------------|---------|-------|-------|------------|--------------|----------|-------------|
| <b>EDP454</b><br>1 rare                                                                       | DPB1* 454:01e  | -       | LFQG  | EEFA  | AAE        | ILEEK        | M        | <b>GEPM</b> |
| <b>EDP867</b><br>1 rare                                                                       | DPB1* 867:01Ne | -       | LFQG  | EEFA  | <b>CCG</b> | <b>HPGGE</b> | <b>D</b> | <b>GRAH</b> |
| <i>Both sides of this epitope require RARE alleles, review results to confirm assignment.</i> |                |         |       |       |            |              |          |             |

OR

| EPITYPE | ALLELES | P GROUP | HVR-A | HVR-B | HVR-C | HVR-D | HVR-E | HVR-F |
|---------|---------|---------|-------|-------|-------|-------|-------|-------|
|---------|---------|---------|-------|-------|-------|-------|-------|-------|

|                                                                                               |               |   |      |      |     |       |   |             |
|-----------------------------------------------------------------------------------------------|---------------|---|------|------|-----|-------|---|-------------|
| <b>EDP177</b><br>1 rare                                                                       | DPB1* 177:01e | - | LFQG | EEFA | AAE | ILEEK | M | <b>SGPM</b> |
| <b>EDP454</b><br>1 rare                                                                       | DPB1* 454:01e | - | LFQG | EEFA | AAE | ILEEK | M | <b>GEPM</b> |
| <i>Both sides of this epitype require RARE alleles, review results to confirm assignment.</i> |               |   |      |      |     |       |   |             |

OR

| EPITYPE                                                                                       | ALLELES       | P GROUP | HVR-A | HVR-B | HVR-C | HVR-D | HVR-E | HVR-F       |
|-----------------------------------------------------------------------------------------------|---------------|---------|-------|-------|-------|-------|-------|-------------|
| <b>EDP454</b><br>1 rare                                                                       | DPB1* 454:01e | -       | LFQG  | EEFA  | AAE   | ILEEK | M     | <b>GEPM</b> |
| <b>EDP747</b><br>1 rare                                                                       | DPB1* 747:01e | -       | VFQG  | EEFA  | AAE   | ILEEK | M     | <b>GGPM</b> |
| <i>Both sides of this epitype require RARE alleles, review results to confirm assignment.</i> |               |         |       |       |       |       |       |             |

OR

| EPITYPE                                                                                       | ALLELES        | P GROUP | HVR-A | HVR-B | HVR-C | HVR-D | HVR-E | HVR-F       |
|-----------------------------------------------------------------------------------------------|----------------|---------|-------|-------|-------|-------|-------|-------------|
| <b>EDP454</b><br>1 rare                                                                       | DPB1* 454:01e  | -       | LFQG  | EEFA  | AAE   | ILEEK | M     | <b>GEPM</b> |
| <b>EDP1122</b><br>1 rare                                                                      | DPB1* 1122:01e | -       | LFQG  | EECA  | AAE   | ILEEK | M     | <b>GGPM</b> |
| <i>Both sides of this epitype require RARE alleles, review results to confirm assignment.</i> |                |         |       |       |       |       |       |             |

OR

| EPITYPE                                                                                       | ALLELES       | P GROUP | HVR-A | HVR-B | HVR-C | HVR-D | HVR-E | HVR-F       |
|-----------------------------------------------------------------------------------------------|---------------|---------|-------|-------|-------|-------|-------|-------------|
| <b>EDP280</b><br>1 rare                                                                       | DPB1* 280:01e | -       | LFQG  | EEFA  | AAE   | ILEEK | M     | <b>GAPM</b> |
| <b>EDP454</b><br>1 rare                                                                       | DPB1* 454:01e | -       | LFQG  | EEFA  | AAE   | ILEEK | M     | <b>GEPM</b> |
| <i>Both sides of this epitype require RARE alleles, review results to confirm assignment.</i> |               |         |       |       |       |       |       |             |

OR

| EPITYPE | ALLELES | P GROUP | HVR-A | HVR-B | HVR-C | HVR-D | HVR-E | HVR-F |
|---------|---------|---------|-------|-------|-------|-------|-------|-------|
|---------|---------|---------|-------|-------|-------|-------|-------|-------|

|                                                                                               |               |   |      |      |     |       |   |             |
|-----------------------------------------------------------------------------------------------|---------------|---|------|------|-----|-------|---|-------------|
| <b>EDP230</b><br>1 rare                                                                       | DPB1* 230:01e | - | LFQG | EEFA | AAE | ILEEK | M | <b>GWPM</b> |
| <b>EDP454</b><br>1 rare                                                                       | DPB1* 454:01e | - | LFQG | EEFA | AAE | ILEEK | M | <b>GEPM</b> |
| <i>Both sides of this epitype require RARE alleles, review results to confirm assignment.</i> |               |   |      |      |     |       |   |             |

OR

| EPITYPE                                                                                       | ALLELES        | P GROUP | HVR-A | HVR-B | HVR-C | HVR-D | HVR-E | HVR-F       |
|-----------------------------------------------------------------------------------------------|----------------|---------|-------|-------|-------|-------|-------|-------------|
| <b>EDP454</b><br>1 rare                                                                       | DPB1* 454:01e  | -       | LFQG  | EEFA  | AAE   | ILEEK | M     | <b>GEPM</b> |
| <b>EDP570</b><br>1 rare                                                                       | DPB1* 911:01Ne | -       | -     | -     | -     | -     | -     | -           |
| <i>Both sides of this epitype require RARE alleles, review results to confirm assignment.</i> |                |         |       |       |       |       |       |             |

OR

| EPITYPE                                                                                       | ALLELES       | P GROUP | HVR-A       | HVR-B | HVR-C | HVR-D | HVR-E | HVR-F       |
|-----------------------------------------------------------------------------------------------|---------------|---------|-------------|-------|-------|-------|-------|-------------|
| <b>EDP454</b><br>1 rare                                                                       | DPB1* 454:01e | -       | <b>LFQG</b> | EEFA  | AAE   | ILEEK | M     | <b>GEPM</b> |
| <b>EDP840</b><br>1 rare                                                                       | DPB1* 840:01e | -       | <b>IFQG</b> | EEFA  | AAE   | ILEEK | M     | <b>GGPM</b> |
| <i>Both sides of this epitype require RARE alleles, review results to confirm assignment.</i> |               |         |             |       |       |       |       |             |

OR

| EPITYPE                                                                                       | ALLELES        | P GROUP | HVR-A | HVR-B       | HVR-C | HVR-D | HVR-E | HVR-F |
|-----------------------------------------------------------------------------------------------|----------------|---------|-------|-------------|-------|-------|-------|-------|
| <b>EDP921</b><br>1 rare                                                                       | DPB1* 921:01e  | -       | LFQG  | <b>GEFA</b> | AAE   | ILEEK | M     | GGPM  |
| <b>EDP1046</b><br>1 rare                                                                      | DPB1* 1046:01e | -       | LFQG  | <b>EEIA</b> | AAE   | ILEEK | M     | GGPM  |
| <i>Both sides of this epitype require RARE alleles, review results to confirm assignment.</i> |                |         |       |             |       |       |       |       |

OR

| EPITYPE | ALLELES | P GROUP | HVR-A | HVR-B | HVR-C | HVR-D | HVR-E | HVR-F |
|---------|---------|---------|-------|-------|-------|-------|-------|-------|
|---------|---------|---------|-------|-------|-------|-------|-------|-------|

|                                                                                               |                |   |      |      |     |       |   |      |
|-----------------------------------------------------------------------------------------------|----------------|---|------|------|-----|-------|---|------|
| <b>EDP871</b><br>1 rare                                                                       | DPB1* 871:01Ne | - | LFQG | EEFA | AAE | HPGGE | D | GRAH |
| <b>EDP1046</b><br>1 rare                                                                      | DPB1* 1046:01e | - | LFQG | EEIA | AAE | ILEEK | M | GGPM |
| <i>Both sides of this epitype require RARE alleles, review results to confirm assignment.</i> |                |   |      |      |     |       |   |      |

OR

| EPITYPE                                                                                       | ALLELES        | P GROUP | HVR-A | HVR-B | HVR-C | HVR-D | HVR-E | HVR-F |
|-----------------------------------------------------------------------------------------------|----------------|---------|-------|-------|-------|-------|-------|-------|
| <b>EDP399</b><br>1 rare                                                                       | DPB1* 399:01e  | -       | LFQG  | EEFA  | AAE   | IVEEK | M     | GGPM  |
| <b>EDP1046</b><br>1 rare                                                                      | DPB1* 1046:01e | -       | LFQG  | EEIA  | AAE   | ILEEK | M     | GGPM  |
| <i>Both sides of this epitype require RARE alleles, review results to confirm assignment.</i> |                |         |       |       |       |       |       |       |

OR

| EPITYPE                                                                                       | ALLELES        | P GROUP | HVR-A | HVR-B | HVR-C | HVR-D | HVR-E | HVR-F |
|-----------------------------------------------------------------------------------------------|----------------|---------|-------|-------|-------|-------|-------|-------|
| <b>EDP319</b><br>1 rare                                                                       | DPB1* 319:01e  | -       | LFQG  | EEFA  | AAE   | IQEEK | M     | GGPM  |
| <b>EDP1046</b><br>1 rare                                                                      | DPB1* 1046:01e | -       | LFQG  | EEIA  | AAE   | ILEEK | M     | GGPM  |
| <i>Both sides of this epitype require RARE alleles, review results to confirm assignment.</i> |                |         |       |       |       |       |       |       |

OR

| EPITYPE                                                                                       | ALLELES        | P GROUP | HVR-A | HVR-B | HVR-C | HVR-D | HVR-E | HVR-F |
|-----------------------------------------------------------------------------------------------|----------------|---------|-------|-------|-------|-------|-------|-------|
| <b>EDP179</b><br>1 rare                                                                       | DPB1* 179:01e  | -       | LFQG  | EEFA  | AAE   | LLEER | M     | GGPM  |
| <b>EDP1046</b><br>1 rare                                                                      | DPB1* 1046:01e | -       | LFQG  | EEIA  | AAE   | ILEEK | M     | GGPM  |
| <i>Both sides of this epitype require RARE alleles, review results to confirm assignment.</i> |                |         |       |       |       |       |       |       |

OR

| EPITYPE | ALLELES | P GROUP | HVR-A | HVR-B | HVR-C | HVR-D | HVR-E | HVR-F |
|---------|---------|---------|-------|-------|-------|-------|-------|-------|
|---------|---------|---------|-------|-------|-------|-------|-------|-------|



|                                                                                               |                |   |      |      |     |       |   |      |
|-----------------------------------------------------------------------------------------------|----------------|---|------|------|-----|-------|---|------|
| <b>EDP679</b><br>1 rare                                                                       | DPB1* 679:01e  | - | PFQG | EEFA | AAE | ILEEK | M | GGPM |
| <b>EDP1046</b><br>1 rare                                                                      | DPB1* 1046:01e | - | LFQG | EEIA | AAE | ILEEK | M | GGPM |
| <i>Both sides of this epitype require RARE alleles, review results to confirm assignment.</i> |                |   |      |      |     |       |   |      |

OR

| EPITYPE                                                                                       | ALLELES        | P GROUP | HVR-A | HVR-B | HVR-C | HVR-D | HVR-E | HVR-F |
|-----------------------------------------------------------------------------------------------|----------------|---------|-------|-------|-------|-------|-------|-------|
| <b>EDP592</b><br>1 rare                                                                       | DPB1* 592:01e  | -       | LFQG  | EEFA  | AAE   | ILEEK | M     | GGPR  |
| <b>EDP1046</b><br>1 rare                                                                      | DPB1* 1046:01e | -       | LFQG  | EEIA  | AAE   | ILEEK | M     | GGPM  |
| <i>Both sides of this epitype require RARE alleles, review results to confirm assignment.</i> |                |         |       |       |       |       |       |       |

OR

| EPITYPE                                                                                       | ALLELES        | P GROUP | HVR-A | HVR-B | HVR-C | HVR-D | HVR-E | HVR-F |
|-----------------------------------------------------------------------------------------------|----------------|---------|-------|-------|-------|-------|-------|-------|
| <b>EDP972</b><br>1 rare                                                                       | DPB1* 972:01e  | -       | LFQG  | GEFV  | AAE   | ILEEK | M     | GGPM  |
| <b>EDP1046</b><br>1 rare                                                                      | DPB1* 1046:01e | -       | LFQG  | EEIA  | AAE   | ILEEK | M     | GGPM  |
| <i>Both sides of this epitype require RARE alleles, review results to confirm assignment.</i> |                |         |       |       |       |       |       |       |

OR

| EPITYPE                                                                                       | ALLELES        | P GROUP | HVR-A | HVR-B | HVR-C | HVR-D | HVR-E | HVR-F |
|-----------------------------------------------------------------------------------------------|----------------|---------|-------|-------|-------|-------|-------|-------|
| <b>EDP642</b><br>1 rare                                                                       | DPB1* 642:01e  | -       | LFQG  | EEFA  | DAE   | ILEEK | M     | GGPM  |
| <b>EDP1046</b><br>1 rare                                                                      | DPB1* 1046:01e | -       | LFQG  | EEIA  | AAE   | ILEEK | M     | GGPM  |
| <i>Both sides of this epitype require RARE alleles, review results to confirm assignment.</i> |                |         |       |       |       |       |       |       |

OR

| EPITYPE | ALLELES | P GROUP | HVR-A | HVR-B | HVR-C | HVR-D | HVR-E | HVR-F |
|---------|---------|---------|-------|-------|-------|-------|-------|-------|
|---------|---------|---------|-------|-------|-------|-------|-------|-------|

|                                                                                               |                |   |      |      |     |       |   |      |
|-----------------------------------------------------------------------------------------------|----------------|---|------|------|-----|-------|---|------|
| <b>EDP1046</b><br>1 rare                                                                      | DPB1* 1046:01e | - | LFQG | EEIA | AAE | ILEEK | M | GGPM |
| <b>EDP1081</b><br>1 rare                                                                      | DPB1* 1081:01e | - | LFQG | EEFA | AAE | VLEEK | M | GGPM |
| <i>Both sides of this epitype require RARE alleles, review results to confirm assignment.</i> |                |   |      |      |     |       |   |      |

OR

| EPITYPE                                                                                       | ALLELES         | P GROUP | HVR-A | HVR-B | HVR-C | HVR-D | HVR-E | HVR-F |
|-----------------------------------------------------------------------------------------------|-----------------|---------|-------|-------|-------|-------|-------|-------|
| <b>EDP1046</b><br>1 rare                                                                      | DPB1* 1046:01e  | -       | LFQG  | EEIA  | AAE   | ILEEK | M     | GGPM  |
| <b>EDP1135</b><br>1 rare                                                                      | DPB1* 1135:01Ne | -       | LFQG  | EEFA  | AAE   | ILGGE | D     | GRAH  |
| <i>Both sides of this epitype require RARE alleles, review results to confirm assignment.</i> |                 |         |       |       |       |       |       |       |

OR

| EPITYPE                                                                                       | ALLELES        | P GROUP | HVR-A | HVR-B | HVR-C | HVR-D | HVR-E | HVR-F |
|-----------------------------------------------------------------------------------------------|----------------|---------|-------|-------|-------|-------|-------|-------|
| <b>EDP687</b><br>1 rare                                                                       | DPB1* 687:01e  | -       | LFQL  | EEFA  | AAE   | ILEEK | M     | GGPM  |
| <b>EDP1046</b><br>1 rare                                                                      | DPB1* 1046:01e | -       | LFQG  | EEIA  | AAE   | ILEEK | M     | GGPM  |
| <i>Both sides of this epitype require RARE alleles, review results to confirm assignment.</i> |                |         |       |       |       |       |       |       |

OR

| EPITYPE                                                                                       | ALLELES        | P GROUP | HVR-A | HVR-B | HVR-C | HVR-D | HVR-E | HVR-F |
|-----------------------------------------------------------------------------------------------|----------------|---------|-------|-------|-------|-------|-------|-------|
| <b>EDP427</b><br>1 rare                                                                       | DPB1* 427:01e  | -       | LFQG  | EEFA  | ATE   | ILEEK | M     | GGPM  |
| <b>EDP1046</b><br>1 rare                                                                      | DPB1* 1046:01e | -       | LFQG  | EEIA  | AAE   | ILEEK | M     | GGPM  |
| <i>Both sides of this epitype require RARE alleles, review results to confirm assignment.</i> |                |         |       |       |       |       |       |       |

OR

| EPITYPE | ALLELES | P GROUP | HVR-A | HVR-B | HVR-C | HVR-D | HVR-E | HVR-F |
|---------|---------|---------|-------|-------|-------|-------|-------|-------|
|---------|---------|---------|-------|-------|-------|-------|-------|-------|

|                                                                                               |                |   |      |      |     |       |   |      |
|-----------------------------------------------------------------------------------------------|----------------|---|------|------|-----|-------|---|------|
| <b>EDP867</b><br>1 rare                                                                       | DPB1* 867:01Ne | - | LFQG | EEFA | CCG | HPGGE | D | GRAH |
| <b>EDP1046</b><br>1 rare                                                                      | DPB1* 1046:01e | - | LFQG | EEIA | AAE | ILEEK | M | GGPM |
| <i>Both sides of this epitype require RARE alleles, review results to confirm assignment.</i> |                |   |      |      |     |       |   |      |

OR

| EPITYPE                                                                                       | ALLELES        | P GROUP | HVR-A | HVR-B | HVR-C | HVR-D | HVR-E | HVR-F |
|-----------------------------------------------------------------------------------------------|----------------|---------|-------|-------|-------|-------|-------|-------|
| <b>EDP177</b><br>1 rare                                                                       | DPB1* 177:01e  | -       | LFQG  | EEFA  | AAE   | ILEEK | M     | SGPM  |
| <b>EDP1046</b><br>1 rare                                                                      | DPB1* 1046:01e | -       | LFQG  | EEIA  | AAE   | ILEEK | M     | GGPM  |
| <i>Both sides of this epitype require RARE alleles, review results to confirm assignment.</i> |                |         |       |       |       |       |       |       |

OR

| EPITYPE                                                                                       | ALLELES        | P GROUP | HVR-A | HVR-B | HVR-C | HVR-D | HVR-E | HVR-F |
|-----------------------------------------------------------------------------------------------|----------------|---------|-------|-------|-------|-------|-------|-------|
| <b>EDP747</b><br>1 rare                                                                       | DPB1* 747:01e  | -       | VFQG  | EEFA  | AAE   | ILEEK | M     | GGPM  |
| <b>EDP1046</b><br>1 rare                                                                      | DPB1* 1046:01e | -       | LFQG  | EEIA  | AAE   | ILEEK | M     | GGPM  |
| <i>Both sides of this epitype require RARE alleles, review results to confirm assignment.</i> |                |         |       |       |       |       |       |       |

OR

| EPITYPE                                                                                       | ALLELES        | P GROUP | HVR-A | HVR-B | HVR-C | HVR-D | HVR-E | HVR-F |
|-----------------------------------------------------------------------------------------------|----------------|---------|-------|-------|-------|-------|-------|-------|
| <b>EDP1046</b><br>1 rare                                                                      | DPB1* 1046:01e | -       | LFQG  | EEIA  | AAE   | ILEEK | M     | GGPM  |
| <b>EDP1122</b><br>1 rare                                                                      | DPB1* 1122:01e | -       | LFQG  | EECA  | AAE   | ILEEK | M     | GGPM  |
| <i>Both sides of this epitype require RARE alleles, review results to confirm assignment.</i> |                |         |       |       |       |       |       |       |

OR

| EPITYPE | ALLELES | P GROUP | HVR-A | HVR-B | HVR-C | HVR-D | HVR-E | HVR-F |
|---------|---------|---------|-------|-------|-------|-------|-------|-------|
|---------|---------|---------|-------|-------|-------|-------|-------|-------|

|                                                                                               |                |   |      |      |     |       |   |      |
|-----------------------------------------------------------------------------------------------|----------------|---|------|------|-----|-------|---|------|
| <b>EDP280</b><br>1 rare                                                                       | DPB1* 280:01e  | - | LFQG | EEFA | AAE | ILEEK | M | GAPM |
| <b>EDP1046</b><br>1 rare                                                                      | DPB1* 1046:01e | - | LFQG | EEIA | AAE | ILEEK | M | GGPM |
| <i>Both sides of this epitype require RARE alleles, review results to confirm assignment.</i> |                |   |      |      |     |       |   |      |

OR

| EPITYPE                                                                                       | ALLELES        | P GROUP | HVR-A | HVR-B | HVR-C | HVR-D | HVR-E | HVR-F |
|-----------------------------------------------------------------------------------------------|----------------|---------|-------|-------|-------|-------|-------|-------|
| <b>EDP230</b><br>1 rare                                                                       | DPB1* 230:01e  | -       | LFQG  | EEFA  | AAE   | ILEEK | M     | GWPM  |
| <b>EDP1046</b><br>1 rare                                                                      | DPB1* 1046:01e | -       | LFQG  | EEIA  | AAE   | ILEEK | M     | GGPM  |
| <i>Both sides of this epitype require RARE alleles, review results to confirm assignment.</i> |                |         |       |       |       |       |       |       |

OR

| EPITYPE                                                                                       | ALLELES        | P GROUP | HVR-A | HVR-B | HVR-C | HVR-D | HVR-E | HVR-F |
|-----------------------------------------------------------------------------------------------|----------------|---------|-------|-------|-------|-------|-------|-------|
| <b>EDP570</b><br>1 rare                                                                       | DPB1* 911:01Ne | -       | -     | -     | -     | -     | -     | -     |
| <b>EDP1046</b><br>1 rare                                                                      | DPB1* 1046:01e | -       | LFQG  | EEIA  | AAE   | ILEEK | M     | GGPM  |
| <i>Both sides of this epitype require RARE alleles, review results to confirm assignment.</i> |                |         |       |       |       |       |       |       |

OR

| EPITYPE                                                                                       | ALLELES        | P GROUP | HVR-A | HVR-B | HVR-C | HVR-D | HVR-E | HVR-F |
|-----------------------------------------------------------------------------------------------|----------------|---------|-------|-------|-------|-------|-------|-------|
| <b>EDP840</b><br>1 rare                                                                       | DPB1* 840:01e  | -       | IFQG  | EEFA  | AAE   | ILEEK | M     | GGPM  |
| <b>EDP1046</b><br>1 rare                                                                      | DPB1* 1046:01e | -       | LFQG  | EEIA  | AAE   | ILEEK | M     | GGPM  |
| <i>Both sides of this epitype require RARE alleles, review results to confirm assignment.</i> |                |         |       |       |       |       |       |       |

OR

| EPITYPE | ALLELES | P GROUP | HVR-A | HVR-B | HVR-C | HVR-D | HVR-E | HVR-F |
|---------|---------|---------|-------|-------|-------|-------|-------|-------|
|---------|---------|---------|-------|-------|-------|-------|-------|-------|

|                                                                                               |                |   |      |      |     |       |   |      |
|-----------------------------------------------------------------------------------------------|----------------|---|------|------|-----|-------|---|------|
| <b>EDP871</b><br>1 rare                                                                       | DPB1* 871:01Ne | - | LFQG | EEFA | AAE | HPGGE | D | GRAH |
| <b>EDP921</b><br>1 rare                                                                       | DPB1* 921:01e  | - | LFQG | GEFA | AAE | ILEEK | M | GGPM |
| <i>Both sides of this epitype require RARE alleles, review results to confirm assignment.</i> |                |   |      |      |     |       |   |      |

OR

| EPITYPE                                                                                       | ALLELES       | P GROUP | HVR-A | HVR-B | HVR-C | HVR-D | HVR-E | HVR-F |
|-----------------------------------------------------------------------------------------------|---------------|---------|-------|-------|-------|-------|-------|-------|
| <b>EDP399</b><br>1 rare                                                                       | DPB1* 399:01e | -       | LFQG  | EEFA  | AAE   | IVEEK | M     | GGPM  |
| <b>EDP921</b><br>1 rare                                                                       | DPB1* 921:01e | -       | LFQG  | GEFA  | AAE   | ILEEK | M     | GGPM  |
| <i>Both sides of this epitype require RARE alleles, review results to confirm assignment.</i> |               |         |       |       |       |       |       |       |

OR

| EPITYPE                                                                                       | ALLELES       | P GROUP | HVR-A | HVR-B | HVR-C | HVR-D | HVR-E | HVR-F |
|-----------------------------------------------------------------------------------------------|---------------|---------|-------|-------|-------|-------|-------|-------|
| <b>EDP319</b><br>1 rare                                                                       | DPB1* 319:01e | -       | LFQG  | EEFA  | AAE   | IQEEK | M     | GGPM  |
| <b>EDP921</b><br>1 rare                                                                       | DPB1* 921:01e | -       | LFQG  | GEFA  | AAE   | ILEEK | M     | GGPM  |
| <i>Both sides of this epitype require RARE alleles, review results to confirm assignment.</i> |               |         |       |       |       |       |       |       |

OR

| EPITYPE                                                                                       | ALLELES       | P GROUP | HVR-A | HVR-B | HVR-C | HVR-D | HVR-E | HVR-F |
|-----------------------------------------------------------------------------------------------|---------------|---------|-------|-------|-------|-------|-------|-------|
| <b>EDP179</b><br>1 rare                                                                       | DPB1* 179:01e | -       | LFQG  | EEFA  | AAE   | LLEER | M     | GGPM  |
| <b>EDP921</b><br>1 rare                                                                       | DPB1* 921:01e | -       | LFQG  | GEFA  | AAE   | ILEEK | M     | GGPM  |
| <i>Both sides of this epitype require RARE alleles, review results to confirm assignment.</i> |               |         |       |       |       |       |       |       |

OR

| EPITYPE | ALLELES | P GROUP | HVR-A | HVR-B | HVR-C | HVR-D | HVR-E | HVR-F |
|---------|---------|---------|-------|-------|-------|-------|-------|-------|
|---------|---------|---------|-------|-------|-------|-------|-------|-------|

|                                                                                               |               |   |      |      |     |       |   |      |
|-----------------------------------------------------------------------------------------------|---------------|---|------|------|-----|-------|---|------|
| <b>EDP679</b><br>1 rare                                                                       | DPB1* 679:01e | - | PFQG | EEFA | AAE | ILEEK | M | GGPM |
| <b>EDP921</b><br>1 rare                                                                       | DPB1* 921:01e | - | LFQG | GEFA | AAE | ILEEK | M | GGPM |
| <i>Both sides of this epitype require RARE alleles, review results to confirm assignment.</i> |               |   |      |      |     |       |   |      |

OR

| EPITYPE                                                                                       | ALLELES       | P GROUP | HVR-A | HVR-B | HVR-C | HVR-D | HVR-E | HVR-F |
|-----------------------------------------------------------------------------------------------|---------------|---------|-------|-------|-------|-------|-------|-------|
| <b>EDP592</b><br>1 rare                                                                       | DPB1* 592:01e | -       | LFQG  | EEFA  | AAE   | ILEEK | M     | GGPR  |
| <b>EDP921</b><br>1 rare                                                                       | DPB1* 921:01e | -       | LFQG  | GEFA  | AAE   | ILEEK | M     | GGPM  |
| <i>Both sides of this epitype require RARE alleles, review results to confirm assignment.</i> |               |         |       |       |       |       |       |       |

OR

| EPITYPE                                                                                       | ALLELES       | P GROUP | HVR-A | HVR-B | HVR-C | HVR-D | HVR-E | HVR-F |
|-----------------------------------------------------------------------------------------------|---------------|---------|-------|-------|-------|-------|-------|-------|
| <b>EDP921</b><br>1 rare                                                                       | DPB1* 921:01e | -       | LFQG  | GEFA  | AAE   | ILEEK | M     | GGPM  |
| <b>EDP972</b><br>1 rare                                                                       | DPB1* 972:01e | -       | LFQG  | GEFV  | AAE   | ILEEK | M     | GGPM  |
| <i>Both sides of this epitype require RARE alleles, review results to confirm assignment.</i> |               |         |       |       |       |       |       |       |

OR

| EPITYPE                                                                                       | ALLELES       | P GROUP | HVR-A | HVR-B | HVR-C | HVR-D | HVR-E | HVR-F |
|-----------------------------------------------------------------------------------------------|---------------|---------|-------|-------|-------|-------|-------|-------|
| <b>EDP642</b><br>1 rare                                                                       | DPB1* 642:01e | -       | LFQG  | EEFA  | DAE   | ILEEK | M     | GGPM  |
| <b>EDP921</b><br>1 rare                                                                       | DPB1* 921:01e | -       | LFQG  | GEFA  | AAE   | ILEEK | M     | GGPM  |
| <i>Both sides of this epitype require RARE alleles, review results to confirm assignment.</i> |               |         |       |       |       |       |       |       |

OR

| EPITYPE | ALLELES | P GROUP | HVR-A | HVR-B | HVR-C | HVR-D | HVR-E | HVR-F |
|---------|---------|---------|-------|-------|-------|-------|-------|-------|
|---------|---------|---------|-------|-------|-------|-------|-------|-------|

|                                                                                               |                |   |      |      |     |       |   |      |
|-----------------------------------------------------------------------------------------------|----------------|---|------|------|-----|-------|---|------|
| <b>EDP921</b><br>1 rare                                                                       | DPB1* 921:01e  | - | LFQG | GEFA | AAE | ILEEK | M | GGPM |
| <b>EDP1081</b><br>1 rare                                                                      | DPB1* 1081:01e | - | LFQG | EEFA | AAE | VLEEK | M | GGPM |
| <i>Both sides of this epitope require RARE alleles, review results to confirm assignment.</i> |                |   |      |      |     |       |   |      |

OR

| EPITYPE                                                                                       | ALLELES         | P GROUP | HVR-A | HVR-B | HVR-C | HVR-D | HVR-E | HVR-F |
|-----------------------------------------------------------------------------------------------|-----------------|---------|-------|-------|-------|-------|-------|-------|
| <b>EDP921</b><br>1 rare                                                                       | DPB1* 921:01e   | -       | LFQG  | GEFA  | AAE   | ILEEK | M     | GGPM  |
| <b>EDP1135</b><br>1 rare                                                                      | DPB1* 1135:01Ne | -       | LFQG  | EEFA  | AAE   | ILGGE | D     | GRAH  |
| <i>Both sides of this epitope require RARE alleles, review results to confirm assignment.</i> |                 |         |       |       |       |       |       |       |

OR

| EPITYPE                                                                                       | ALLELES       | P GROUP | HVR-A | HVR-B | HVR-C | HVR-D | HVR-E | HVR-F |
|-----------------------------------------------------------------------------------------------|---------------|---------|-------|-------|-------|-------|-------|-------|
| <b>EDP687</b><br>1 rare                                                                       | DPB1* 687:01e | -       | LFQL  | EEFA  | AAE   | ILEEK | M     | GGPM  |
| <b>EDP921</b><br>1 rare                                                                       | DPB1* 921:01e | -       | LFQG  | GEFA  | AAE   | ILEEK | M     | GGPM  |
| <i>Both sides of this epitope require RARE alleles, review results to confirm assignment.</i> |               |         |       |       |       |       |       |       |

OR

| EPITYPE                                                                                       | ALLELES       | P GROUP | HVR-A | HVR-B | HVR-C | HVR-D | HVR-E | HVR-F |
|-----------------------------------------------------------------------------------------------|---------------|---------|-------|-------|-------|-------|-------|-------|
| <b>EDP427</b><br>1 rare                                                                       | DPB1* 427:01e | -       | LFQG  | EEFA  | ATE   | ILEEK | M     | GGPM  |
| <b>EDP921</b><br>1 rare                                                                       | DPB1* 921:01e | -       | LFQG  | GEFA  | AAE   | ILEEK | M     | GGPM  |
| <i>Both sides of this epitope require RARE alleles, review results to confirm assignment.</i> |               |         |       |       |       |       |       |       |

OR

| EPITYPE | ALLELES | P GROUP | HVR-A | HVR-B | HVR-C | HVR-D | HVR-E | HVR-F |
|---------|---------|---------|-------|-------|-------|-------|-------|-------|
|---------|---------|---------|-------|-------|-------|-------|-------|-------|

|                                                                                               |                |   |      |      |     |       |   |      |
|-----------------------------------------------------------------------------------------------|----------------|---|------|------|-----|-------|---|------|
| <b>EDP867</b><br>1 rare                                                                       | DPB1* 867:01Ne | - | LFQG | EEFA | CCG | HPGGE | D | GRAH |
| <b>EDP921</b><br>1 rare                                                                       | DPB1* 921:01e  | - | LFQG | GEFA | AAE | ILEEK | M | GGPM |
| <i>Both sides of this epitype require RARE alleles, review results to confirm assignment.</i> |                |   |      |      |     |       |   |      |

OR

| EPITYPE                                                                                       | ALLELES       | P GROUP | HVR-A | HVR-B | HVR-C | HVR-D | HVR-E | HVR-F |
|-----------------------------------------------------------------------------------------------|---------------|---------|-------|-------|-------|-------|-------|-------|
| <b>EDP177</b><br>1 rare                                                                       | DPB1* 177:01e | -       | LFQG  | EEFA  | AAE   | ILEEK | M     | SGPM  |
| <b>EDP921</b><br>1 rare                                                                       | DPB1* 921:01e | -       | LFQG  | GEFA  | AAE   | ILEEK | M     | GGPM  |
| <i>Both sides of this epitype require RARE alleles, review results to confirm assignment.</i> |               |         |       |       |       |       |       |       |

OR

| EPITYPE                                                                                       | ALLELES       | P GROUP | HVR-A | HVR-B | HVR-C | HVR-D | HVR-E | HVR-F |
|-----------------------------------------------------------------------------------------------|---------------|---------|-------|-------|-------|-------|-------|-------|
| <b>EDP747</b><br>1 rare                                                                       | DPB1* 747:01e | -       | VFQG  | EEFA  | AAE   | ILEEK | M     | GGPM  |
| <b>EDP921</b><br>1 rare                                                                       | DPB1* 921:01e | -       | LFQG  | GEFA  | AAE   | ILEEK | M     | GGPM  |
| <i>Both sides of this epitype require RARE alleles, review results to confirm assignment.</i> |               |         |       |       |       |       |       |       |

OR

| EPITYPE                                                                                       | ALLELES        | P GROUP | HVR-A | HVR-B | HVR-C | HVR-D | HVR-E | HVR-F |
|-----------------------------------------------------------------------------------------------|----------------|---------|-------|-------|-------|-------|-------|-------|
| <b>EDP921</b><br>1 rare                                                                       | DPB1* 921:01e  | -       | LFQG  | GEFA  | AAE   | ILEEK | M     | GGPM  |
| <b>EDP1122</b><br>1 rare                                                                      | DPB1* 1122:01e | -       | LFQG  | EECA  | AAE   | ILEEK | M     | GGPM  |
| <i>Both sides of this epitype require RARE alleles, review results to confirm assignment.</i> |                |         |       |       |       |       |       |       |

OR

| EPITYPE | ALLELES | P GROUP | HVR-A | HVR-B | HVR-C | HVR-D | HVR-E | HVR-F |
|---------|---------|---------|-------|-------|-------|-------|-------|-------|
|---------|---------|---------|-------|-------|-------|-------|-------|-------|



|                                                                                               |               |   |      |      |     |       |   |      |
|-----------------------------------------------------------------------------------------------|---------------|---|------|------|-----|-------|---|------|
| <b>EDP280</b><br>1 rare                                                                       | DPB1* 280:01e | - | LFQG | EEFA | AAE | ILEEK | M | GAPM |
| <b>EDP921</b><br>1 rare                                                                       | DPB1* 921:01e | - | LFQG | GEFA | AAE | ILEEK | M | GGPM |
| <i>Both sides of this epitype require RARE alleles, review results to confirm assignment.</i> |               |   |      |      |     |       |   |      |

OR

| EPITYPE                                                                                       | ALLELES       | P GROUP | HVR-A | HVR-B | HVR-C | HVR-D | HVR-E | HVR-F |
|-----------------------------------------------------------------------------------------------|---------------|---------|-------|-------|-------|-------|-------|-------|
| <b>EDP230</b><br>1 rare                                                                       | DPB1* 230:01e | -       | LFQG  | EEFA  | AAE   | ILEEK | M     | GWPM  |
| <b>EDP921</b><br>1 rare                                                                       | DPB1* 921:01e | -       | LFQG  | GEFA  | AAE   | ILEEK | M     | GGPM  |
| <i>Both sides of this epitype require RARE alleles, review results to confirm assignment.</i> |               |         |       |       |       |       |       |       |

OR

| EPITYPE                                                                                       | ALLELES        | P GROUP | HVR-A | HVR-B | HVR-C | HVR-D | HVR-E | HVR-F |
|-----------------------------------------------------------------------------------------------|----------------|---------|-------|-------|-------|-------|-------|-------|
| <b>EDP570</b><br>1 rare                                                                       | DPB1* 911:01Ne | -       | -     | -     | -     | -     | -     | -     |
| <b>EDP921</b><br>1 rare                                                                       | DPB1* 921:01e  | -       | LFQG  | GEFA  | AAE   | ILEEK | M     | GGPM  |
| <i>Both sides of this epitype require RARE alleles, review results to confirm assignment.</i> |                |         |       |       |       |       |       |       |

OR

| EPITYPE                                                                                       | ALLELES       | P GROUP | HVR-A | HVR-B | HVR-C | HVR-D | HVR-E | HVR-F |
|-----------------------------------------------------------------------------------------------|---------------|---------|-------|-------|-------|-------|-------|-------|
| <b>EDP840</b><br>1 rare                                                                       | DPB1* 840:01e | -       | IFQG  | EEFA  | AAE   | ILEEK | M     | GGPM  |
| <b>EDP921</b><br>1 rare                                                                       | DPB1* 921:01e | -       | LFQG  | GEFA  | AAE   | ILEEK | M     | GGPM  |
| <i>Both sides of this epitype require RARE alleles, review results to confirm assignment.</i> |               |         |       |       |       |       |       |       |

OR

| EPITYPE | ALLELES | P GROUP | HVR-A | HVR-B | HVR-C | HVR-D | HVR-E | HVR-F |
|---------|---------|---------|-------|-------|-------|-------|-------|-------|
|---------|---------|---------|-------|-------|-------|-------|-------|-------|

|                                                                                               |                |   |      |      |     |              |          |             |
|-----------------------------------------------------------------------------------------------|----------------|---|------|------|-----|--------------|----------|-------------|
| <b>EDP399</b><br>1 rare                                                                       | DPB1* 399:01e  | - | LFQG | EEFA | AAE | <b>IVEEK</b> | M        | GGPM        |
| <b>EDP871</b><br>1 rare                                                                       | DPB1* 871:01Ne | - | LFQG | EEFA | AAE | <b>HPGGE</b> | <b>D</b> | <b>GRAH</b> |
| <i>Both sides of this epitope require RARE alleles, review results to confirm assignment.</i> |                |   |      |      |     |              |          |             |

OR

| EPITYPE                                                                                       | ALLELES        | P GROUP | HVR-A | HVR-B | HVR-C | HVR-D        | HVR-E    | HVR-F       |
|-----------------------------------------------------------------------------------------------|----------------|---------|-------|-------|-------|--------------|----------|-------------|
| <b>EDP319</b><br>1 rare                                                                       | DPB1* 319:01e  | -       | LFQG  | EEFA  | AAE   | <b>IQEEK</b> | M        | GGPM        |
| <b>EDP871</b><br>1 rare                                                                       | DPB1* 871:01Ne | -       | LFQG  | EEFA  | AAE   | <b>HPGGE</b> | <b>D</b> | <b>GRAH</b> |
| <i>Both sides of this epitope require RARE alleles, review results to confirm assignment.</i> |                |         |       |       |       |              |          |             |

OR

| EPITYPE                                                                                       | ALLELES        | P GROUP | HVR-A | HVR-B | HVR-C | HVR-D        | HVR-E    | HVR-F       |
|-----------------------------------------------------------------------------------------------|----------------|---------|-------|-------|-------|--------------|----------|-------------|
| <b>EDP179</b><br>1 rare                                                                       | DPB1* 179:01e  | -       | LFQG  | EEFA  | AAE   | <b>LLEER</b> | M        | GGPM        |
| <b>EDP871</b><br>1 rare                                                                       | DPB1* 871:01Ne | -       | LFQG  | EEFA  | AAE   | <b>HPGGE</b> | <b>D</b> | <b>GRAH</b> |
| <i>Both sides of this epitope require RARE alleles, review results to confirm assignment.</i> |                |         |       |       |       |              |          |             |

*Cannot exclude the following alleles from another locus:*

*DPB1\*04:01:01:01, DPB1\*04:01:01:02e, DPB1\*04:01:01:03e, DPB1\*04:01:01:04e, DPB1\*04:01:01:05e, DPB1\*04:01:01:06e, DPB1\*04:01:01:07e, DPB1\*04:01:01:08e, DPB1\*04:01:01:09e, DPB1\*04:01:01:10e, DPB1\*04:01:01:11e, DPB1\*04:01:01:12e, DPB1\*04:01:01:13e, DPB1\*04:01:01:14e, DPB1\*04:01:01:15e, DPB1\*04:01:01:16e, DPB1\*04:01:01:17e, DPB1\*04:01:01:18e, DPB1\*04:01:01:19e, DPB1\*04:01:01:20e, DPB1\*04:01:01:21e, DPB1\*04:01:01:22e, DPB1\*04:01:01:23e, DPB1\*04:01:01:24Ne, DPB1\*04:01:01:25e, DPB1\*04:01:01:26e, DPB1\*04:01:01:27e, DPB1\*04:01:01:28e, DPB1\*04:01:01:29e, DPB1\*04:01:01:30e, DPB1\*04:01:01:31e, DPB1\*04:01:01:32e, DPB1\*04:01:01:33e, DPB1\*04:01:01:34e, DPB1\*04:01:01:35e, DPB1\*04:01:01:36e, DPB1\*04:01:01:37e, DPB1\*04:01:01:38e, DPB1\*04:01:01:39e, DPB1\*04:01:01:40e, DPB1\*04:01:01:41e, DPB1\*04:01:01:42e, DPB1\*04:01:01:43e, DPB1\*04:01:01:44e, DPB1\*04:01:01:45e, DPB1\*04:01:01:46e, DPB1\*04:01:01:47e, DPB1\*04:01:01:48e, DPB1\*04:01:01:49e, DPB1\*04:01:01:50e, DPB1\*04:01:01:51e, DPB1\*04:01:01:52e, DPB1\*04:01:01:53e, DPB1\*04:01:02e, DPB1\*04:01:03e, DPB1\*04:01:04:01e, DPB1\*04:01:04:02e, DPB1\*04:01:05e, DPB1\*04:01:06e, DPB1\*04:01:07e, DPB1\*04:01:08e, DPB1\*04:01:09e, DPB1\*04:01:10e, DPB1\*04:01:11e, DPB1\*04:01:12e, DPB1\*04:01:13e, DPB1\*04:01:14e, DPB1\*04:01:15e, DPB1\*04:01:16e, DPB1\*04:01:17e, DPB1\*04:01:18e, DPB1\*04:01:19e, DPB1\*04:01:20e, DPB1\*04:01:21e, DPB1\*04:01:22e, DPB1\*04:01:23e, DPB1\*04:01:24e, DPB1\*04:01:25e, DPB1\*04:01:26e, DPB1\*04:01:27e, DPB1\*04:01:28e, DPB1\*04:01:29e, DPB1\*04:01:30e, DPB1\*04:01:31e, DPB1\*04:01:32e, DPB1\*04:01:33e, DPB1\*04:01:34e, DPB1\*04:01:35e, DPB1\*04:01:36e, DPB1\*04:01:37:01e, DPB1\*04:01:37:02e, DPB1\*04:01:38e, DPB1\*04:01:39:01e, DPB1\*04:01:39:02e, DPB1\*04:01:40e, DPB1\*04:01:41e, DPB1\*04:01:42e, DPB1\*04:01:43e, DPB1\*04:01:44e, DPB1\*04:01:45e, DPB1\*04:01:46e, DPB1\*04:01:47e, DPB1\*04:01:47e, DPB1\*04:01:48e, DPB1\*04:01:49e, DPB1\*04:01:50e, DPB1\*04:01:50e, DPB1\*99:01e, DPB1\*120:01Ne, DPB1\*121:01e, DPB1\*128:01e, DPB1\*134:01e, DPB1\*149:01e, DPB1\*169:01e, DPB1\*174:01e, DPB1\*175:01e, DPB1\*176:01e, DPB1\*177:01e, DPB1\*178:01e, DPB1\*179:01e, DPB1\*180:01e, DPB1\*181:01e, DPB1\*192:01e, DPB1\*193:01e, DPB1\*194:01e, DPB1\*195:01e, DPB1\*212:01e, DPB1\*213:01:01e, DPB1\*213:01:02e, DPB1\*216:01Ne, DPB1\*224:01e, DPB1\*225:01e, DPB1\*227:01:01e, DPB1\*227:01:02e, DPB1\*227:01:03e, DPB1\*228:01e, DPB1\*230:01e, DPB1\*231:01e, DPB1\*232:01e, DPB1\*240:01e, DPB1\*253:01e, DPB1\*254:01e, DPB1\*255:01e, DPB1\*262:01e, DPB1\*272:01e, DPB1\*275:01e, DPB1\*276:01e, DPB1\*278:01e, DPB1\*279:01:01e, DPB1\*279:01:02e, DPB1\*280:01e, DPB1\*281:01e, DPB1\*282:01e, DPB1\*283:01e, DPB1\*298:01e, DPB1\*303:01e, DPB1\*318:01e, DPB1\*319:01e, DPB1\*320:01e,*

DPB1\*323:01e, DPB1\*334:01:01e, DPB1\*334:01:02e, DPB1\*335:01e, DPB1\*336:01e, DPB1\*341:01e, DPB1\*350:01e, DPB1\*356:01e,  
DPB1\*357:01Ne, DPB1\*360:01e, DPB1\*372:01e, DPB1\*375:01e, DPB1\*376:01e, DPB1\*378:01e, DPB1\*396:01e, DPB1\*397:01e,  
DPB1\*399:01e, DPB1\*415:01e, DPB1\*418:01e, DPB1\*425:01e, DPB1\*426:01e, DPB1\*427:01e, DPB1\*428:01e, DPB1\*434:01e,  
DPB1\*453:01e, DPB1\*454:01e, DPB1\*455:01Ne, DPB1\*456:01e, DPB1\*459:01e, DPB1\*464:01e, DPB1\*465:01e, DPB1\*468:01e,  
DPB1\*475:01e, DPB1\*476:01e, DPB1\*479:01e, DPB1\*485:01e, DPB1\*486:01e, DPB1\*487:01e, DPB1\*497:01e, DPB1\*500:01e,  
DPB1\*520:01e, DPB1\*521:01e, DPB1\*522:01e, DPB1\*523:01:01e, DPB1\*523:01:02e, DPB1\*524:01e, DPB1\*529:01e, DPB1\*534:01e,  
DPB1\*553:01e, DPB1\*554:01e, DPB1\*556:01e, DPB1\*559:01e, DPB1\*569:01e, DPB1\*575:01e, DPB1\*578:01e, DPB1\*583:01e,  
DPB1\*591:01e, DPB1\*592:01e, DPB1\*593:01e, DPB1\*607:01e, DPB1\*614:01e, DPB1\*615:01e, DPB1\*618:01e, DPB1\*625:01e,  
DPB1\*642:01e, DPB1\*643:01e, DPB1\*658:01e, DPB1\*666:01e, DPB1\*670:01e, DPB1\*677:01e, DPB1\*679:01e, DPB1\*682:01e,  
DPB1\*683:01e, DPB1\*686:01e, DPB1\*687:01e, DPB1\*694:01e, DPB1\*696:01Ne, DPB1\*699:01e, DPB1\*722:01e, DPB1\*739:01e,  
DPB1\*742:01e, DPB1\*743:01Ne, DPB1\*747:01e, DPB1\*748:01Ne, DPB1\*750:01e, DPB1\*753:01e, DPB1\*754:01Ne, DPB1\*755:01e,  
DPB1\*756:01Ne, DPB1\*757:01e, DPB1\*758:01e, DPB1\*761:01e, DPB1\*765:01e, DPB1\*767:01e, DPB1\*769:01e, DPB1\*772:01e,  
DPB1\*773:01e, DPB1\*784:01e, DPB1\*788:01e, DPB1\*795:01e, DPB1\*803:01e, DPB1\*804:01e, DPB1\*806:01:01:01e,  
DPB1\*806:01:01:02e, DPB1\*808:01e, DPB1\*811:01e, DPB1\*812:01e, DPB1\*813:01e, DPB1\*814:01e, DPB1\*820:01e,  
DPB1\*824:01:01:01e, DPB1\*824:01:02e, DPB1\*826:01e, DPB1\*828:01e, DPB1\*837:01e, DPB1\*838:01Ne, DPB1\*840:01e,  
DPB1\*842:01e, DPB1\*844:01Ne, DPB1\*850:01e, DPB1\*852:01e, DPB1\*859:01e, DPB1\*867:01Ne, DPB1\*868:01Ne, DPB1\*871:01Ne,  
DPB1\*874:01Ne, DPB1\*875:01Ne, DPB1\*878:01Ne, DPB1\*880:01e, DPB1\*882:01e, DPB1\*895:01e, DPB1\*911:01Ne, DPB1\*915:01e,  
DPB1\*921:01e, DPB1\*926:01e, DPB1\*932:01e, DPB1\*934:01Qe, DPB1\*939:01e, DPB1\*957:01e, DPB1\*966:01e, DPB1\*972:01e,  
DPB1\*974:01Ne, DPB1\*978:01e, DPB1\*988:01e, DPB1\*989:01e, DPB1\*992:01e, DPB1\*993:01e, DPB1\*997:01e, DPB1\*1001:01e,  
DPB1\*1002:01e, DPB1\*1003:01e, DPB1\*1004:01e, DPB1\*1010:01e, DPB1\*1011:01e, DPB1\*1016:01e, DPB1\*1023:01e,  
DPB1\*1033:01e, DPB1\*1040:01e, DPB1\*1042:01e, DPB1\*1044:01Ne, DPB1\*1046:01e, DPB1\*1048:01e, DPB1\*1060:01e,  
DPB1\*1062:01e, DPB1\*1064:01e, DPB1\*1066:01e, DPB1\*1074:01e, DPB1\*1079:01Ne, DPB1\*1081:01e, DPB1\*1086:01e,  
DPB1\*1091:01e, DPB1\*1097:01e, DPB1\*1100:01e, DPB1\*1108:01e, DPB1\*1112:01Ne, DPB1\*1113:01e, DPB1\*1121:01Ne,  
DPB1\*1122:01e, DPB1\*1129:01e, DPB1\*1132:01e, DPB1\*1135:01Ne, DPB1\*1138:01e, DPB1\*1139:01e, DPB1\*1146:01e,  
DPB1\*1148:01Qe, DPB1\*1152:01e, DPB1\*1155:01e, DPB1\*1161:01e, DPB1\*1164:01e, DPB1\*1167:01e, DQB1\*03:336e,  
DQB1\*03:363e

## HAPLOTYPES

### B-C

| B*44    | C*05    | AFA          | API          | EUR           | HIS           |
|---------|---------|--------------|--------------|---------------|---------------|
| B*44:02 | C*05:01 | 1.786 % (15) | 0.711 % (35) | 7.715 % (3)   | 2.684 % (6)   |
| B*44:02 | C*05:05 | -            | -            | 0.019 % (116) | -             |
| B*44:02 | C*05:07 | -            | -            | 0.006 % (227) | -             |
| B*44:02 | C*05:09 | -            | -            | -             | 0.050 % (178) |
| B*44:03 | C*05:01 | -            | -            | 0.006 % (284) | 0.026 % (198) |

| B*44    | C*05    | AFA          | API          | EUR           | HIS           |
|---------|---------|--------------|--------------|---------------|---------------|
| B*44:02 | C*05:01 | 1.786 % (15) | 0.711 % (35) | 7.715 % (3)   | 2.684 % (6)   |
| B*44:02 | C*05:05 | -            | -            | 0.019 % (116) | -             |
| B*44:02 | C*05:07 | -            | -            | 0.006 % (227) | -             |
| B*44:02 | C*05:09 | -            | -            | -             | 0.050 % (178) |
| B*44:03 | C*05:01 | -            | -            | 0.006 % (284) | 0.026 % (198) |

### DQB1-DRB1

| DQB1*03    | DRB1*07    | AFA          | API          | EUR          | HIS          |
|------------|------------|--------------|--------------|--------------|--------------|
| DQB1*03:03 | DRB1*07:01 | 0.540 % (32) | 1.721 % (23) | 3.642 % (9)  | 1.484 % (22) |
| DQB1*03:01 | DRB1*07:01 | -            | 0.045 % (73) | 0.029 % (49) | -            |

| DQB1*03    | DRB1*11    | AFA          | API          | EUR          | HIS          |
|------------|------------|--------------|--------------|--------------|--------------|
| DQB1*03:01 | DRB1*11:01 | 3.728 % (7)  | 5.465 % (4)  | 5.571 % (6)  | 3.689 % (8)  |
| DQB1*03:01 | DRB1*11:04 | 0.434 % (33) | 0.574 % (31) | 3.062 % (12) | 2.412 % (12) |
| DQB1*03:01 | DRB1*11:06 | -            | 0.397 % (40) | -            | -            |
| DQB1*03:01 | DRB1*11:08 | -            | 0.044 % (88) | -            | -            |
| DQB1*03:01 | DRB1*11:39 | -            | -            | 0.006 % (87) | -            |
| DQB1*03:03 | DRB1*11:01 | -            | 0.047 % (70) | -            | -            |

## TRAY ASSAYS

This tray contains tests for A, B, C, DR, DQA, DQB, DPA, DPB.

|   | 1 | 2 | 3 | 4 | 5 | 6 | 7 | 8 | 9 | 10 | 11 | 12 | 13 | 14 | 15 | 16 | 17 | 18 | 19 | 20 | 21 | 22 | 23 | 24 |
|---|---|---|---|---|---|---|---|---|---|----|----|----|----|----|----|----|----|----|----|----|----|----|----|----|
| A | + | - | - | + | - | - | - | - | - | +  | -  | -  | -  | -  | -  | -  | -  | -  | -  | -  | -  | -  | -  | -  |
| B | - | - | - | - | - | - | - | - | - | -  | -  | -  | -  | -  | -  | -  | -  | -  | -  | -  | -  | -  | -  | -  |
| C | - | - | - | - | - | - | - | - | - | -  | -  | -  | -  | -  | -  | -  | -  | -  | -  | -  | -  | -  | -  | -  |
| D | - | - | - | - | - | - | - | - | - | -  | -  | -  | -  | -  | -  | -  | -  | -  | -  | -  | -  | -  | -  | -  |
| E | + | + | + | - | - | - | - | - | - | -  | -  | -  | -  | -  | -  | -  | -  | -  | -  | -  | -  | -  | -  | -  |
| F | - | - | - | - | - | - | - | - | - | -  | -  | +  | -  | -  | -  | -  | -  | -  | -  | -  | -  | -  | -  | -  |
| G | + | + | - | - | - | - | - | - | - | -  | -  | -  | +  | -  | -  | -  | -  | -  | -  | -  | -  | -  | -  | -  |
| H | - | - | - | - | - | - | - | + | - | -  | -  | -  | -  | +  | +  | -  | -  | -  | -  | -  | -  | -  | -  | -  |
| I | - | + | - | - | - | - | - | + | - | -  | -  | -  | -  | -  | -  | -  | -  | -  | -  | -  | -  | -  | -  | +  |
| J | - | - | + | + | - | - | + | - | - | -  | +  | -  | -  | +  | -  | -  | -  | +  | +  | +  | -  | +  | +  | -  |
| K | - | - | - | - | - | - | + | - | - | -  | -  | -  | -  | -  | -  | +  | -  | +  | -  | -  | -  | -  | -  | -  |
| L | - | - | + | - | - | - | + | - | - | -  | -  | +  | -  | -  | -  | -  | -  | +  | -  | -  | -  | +  | -  | -  |
| M | - | - | + | + | - | - | - | - | - | -  | -  | -  | -  | -  | -  | -  | -  | -  | -  | -  | -  | -  | -  | -  |
| N | - | - | - | - | - | - | - | - | - | -  | -  | +  | -  | -  | -  | -  | -  | -  | -  | -  | -  | -  | -  | -  |
| O | - | - | - | - | - | - | - | - | - | -  | -  | -  | -  | +  | -  | -  | -  | -  | -  | -  | -  | -  | -  | +  |
| P | + | + | + | - | - | - | - | - | - | +  | -  | -  | -  | -  | -  | -  | -  | -  | -  | -  | -  | +  | -  | +  |

**TRAY DATA**

The HLA-A test consists of wells A2-P19.

| Well | Neg Tm Range  | Pos Tm Range  | Negative Peak   | Positive Peak  | Peak Height Ratio | Call | Note |
|------|---------------|---------------|-----------------|----------------|-------------------|------|------|
| A2   | 68.5 - 74.0 C | 83.5 - 88.5 C | 71.74 C, 81270  | -              | -                 | Neg  |      |
| A3   | 68.5 - 74.0 C | 88.0 - 92.5 C | 70.78 C, 59216  | -              | -                 | Neg  |      |
| A4   | 68.5 - 74.0 C | 86.0 - 91.0 C | -               | 87.87 C, 61717 | -                 | Pos  |      |
| A5   | 68.5 - 74.0 C | 85.0 - 90.0 C | 71.74 C, 81055  | -              | -                 | Neg  |      |
| A6   | 68.5 - 74.0 C | 84.0 - 89.0 C | 71.74 C, 95087  | -              | -                 | Neg  |      |
| A7   | 68.5 - 74.0 C | 86.5 - 93.5 C | 71.74 C, 76978  | -              | -                 | Neg  |      |
| A8   | 68.5 - 74.0 C | 79.0 - 85.0 C | 71.74 C, 105070 | -              | -                 | Neg  |      |
| A9   | 68.5 - 74.0 C | 82.0 - 87.5 C | 71.74 C, 104611 | -              | -                 | Neg  |      |
| A10  | 68.5 - 74.0 C | 84.5 - 89.0 C | -               | 86.66 C, 82597 | -                 | Pos  |      |
| A11  | 68.5 - 74.0 C | 88.0 - 92.5 C | 71.74 C, 93610  | -              | -                 | Neg  |      |
| A12  | 68.5 - 74.0 C | 88.0 - 92.5 C | 71.74 C, 93959  | -              | -                 | Neg  |      |
| A13  | 68.5 - 74.0 C | 86.0 - 90.5 C | 71.74 C, 112913 | -              | -                 | Neg  |      |
| A14  | 68.5 - 74.0 C | 86.5 - 91.0 C | 71.74 C, 101822 | -              | -                 | Neg  |      |
| A15  | 68.5 - 74.0 C | 87.5 - 92.5 C | 71.74 C, 108843 | -              | -                 | Neg  |      |
| A16  | 68.5 - 74.0 C | 88.0 - 92.5 C | 71.74 C, 91015  | -              | -                 | Neg  |      |
| A17  | 68.5 - 74.0 C | 88.5 - 92.5 C | 71.26 C, 103348 | -              | -                 | Neg  |      |
| A18  | 68.5 - 74.0 C | 85.0 - 90.0 C | 71.02 C, 55393  | -              | -                 | Neg  |      |
| A19  | 68.5 - 74.0 C | 89.0 - 93.0 C | 71.74 C, 101624 | -              | -                 | Neg  |      |
| A20  | 68.5 - 74.0 C | 83.5 - 88.0 C | 71.50 C, 81977  | -              | -                 | Neg  |      |
| A21  | 68.5 - 74.0 C | 80.0 - 85.0 C | 71.26 C, 79730  | -              | -                 | Neg  |      |
| A22  | 68.5 - 74.0 C | 89.0 - 93.0 C | 71.74 C, 113854 | -              | -                 | Neg  |      |
| A23  | 68.5 - 74.0 C | 89.0 - 93.0 C | 71.74 C, 105052 | -              | -                 | Neg  |      |
| A24  | 68.5 - 74.0 C | 88.5 - 92.5 C | 71.98 C, 103215 | -              | -                 | Neg  |      |
| B1   | 68.5 - 74.0 C | 88.5 - 92.5 C | 71.50 C, 96299  | -              | -                 | Neg  |      |
| B2   | 68.5 - 74.0 C | 88.5 - 92.5 C | 71.26 C, 80329  | -              | -                 | Neg  |      |
| B3   | 68.5 - 74.0 C | 85.0 - 90.0 C | 71.74 C, 92199  | -              | -                 | Neg  |      |
| B4   | 68.5 - 74.0 C | 82.5 - 87.5 C | 71.50 C, 91878  | -              | -                 | Neg  |      |
| B5   | 68.5 - 74.0 C | 88.0 - 92.5 C | 71.50 C, 84518  | -              | -                 | Neg  |      |
| B6   | 68.5 - 74.0 C | 88.0 - 92.5 C | 71.74 C, 99923  | -              | -                 | Neg  |      |
| B7   | 68.5 - 74.0 C | 86.5 - 91.0 C | 71.74 C, 98993  | -              | -                 | Neg  |      |
| B8   | 71.0 - 76.0 C | 85.0 - 90.0 C | 73.42 C, 100520 | -              | -                 | Neg  |      |
| B9   | 68.5 - 74.0 C | 88.0 - 92.0 C | 71.50 C, 113398 | -              | -                 | Neg  |      |
| B10  | 68.5 - 74.0 C | 87.5 - 92.0 C | 71.50 C, 88902  | -              | -                 | Neg  |      |
| B11  | 68.5 - 74.0 C | 88.0 - 92.0 C | 71.74 C, 102673 | -              | -                 | Neg  |      |
| B12  | 68.5 - 74.0 C | 85.5 - 89.5 C | 71.74 C, 98912  | -              | -                 | Neg  |      |
| B13  | 68.5 - 74.0 C | 88.0 - 92.0 C | 71.50 C, 99707  | -              | -                 | Neg  |      |
| B14  | 68.5 - 74.0 C | 88.5 - 92.5 C | 71.74 C, 106715 | -              | -                 | Neg  |      |
| B15  | 68.5 - 74.0 C | 88.0 - 92.5 C | 71.74 C, 111558 | -              | -                 | Neg  |      |
| B16  | 68.5 - 74.0 C | 86.5 - 90.0 C | 71.74 C, 106400 | -              | -                 | Neg  |      |
| B17  | 68.5 - 74.0 C | 78.0 - 84.0 C | 71.74 C, 95697  | -              | -                 | Neg  |      |
| B18  | 68.5 - 74.0 C | 84.0 - 88.5 C | 71.74 C, 96018  | -              | -                 | Neg  |      |
| B19  | 68.5 - 74.0 C | 88.0 - 93.0 C | 71.74 C, 97829  | -              | -                 | Neg  |      |
| B20  | 71.0 - 76.0 C | 85.0 - 90.0 C | 73.42 C, 85515  | -              | -                 | Neg  |      |
| B21  | 68.5 - 74.0 C | 86.0 - 91.0 C | 71.98 C, 100221 | -              | -                 | Neg  |      |
| B22  | 68.5 - 74.0 C | 86.5 - 90.5 C | 71.74 C, 91654  | -              | -                 | Neg  |      |
| M13  | 68.5 - 74.0 C | 88.5 - 92.5 C | 71.74 C, 115419 | -              | -                 | Neg  |      |
| M14  | 68.5 - 74.0 C | 86.5 - 91.0 C | 71.50 C, 107351 | -              | -                 | Neg  |      |
| M15  | 68.5 - 74.0 C | 85.0 - 90.0 C | 71.98 C, 104345 | -              | -                 | Neg  |      |
| M16  | 68.5 - 74.0 C | 82.5 - 87.5 C | 71.50 C, 105599 | -              | -                 | Neg  |      |

|     |               |               |                 |                |   |     |
|-----|---------------|---------------|-----------------|----------------|---|-----|
| M17 | 68.5 - 74.0 C | 86.5 - 90.0 C | 71.74 C, 108290 | -              | - | Neg |
| M18 | 71.0 - 76.0 C | 85.0 - 90.0 C | 73.42 C, 112454 | -              | - | Neg |
| M19 | 68.5 - 74.0 C | 88.0 - 92.0 C | 71.74 C, 115184 | -              | - | Neg |
| M20 | 68.5 - 74.0 C | 85.5 - 89.5 C | 71.74 C, 97822  | -              | - | Neg |
| M21 | 68.5 - 74.0 C | 88.5 - 92.5 C | 71.98 C, 105693 | -              | - | Neg |
| M22 | 68.5 - 74.0 C | 88.0 - 93.0 C | 71.98 C, 109085 | -              | - | Neg |
| M23 | 71.0 - 76.0 C | 85.0 - 90.0 C | 73.42 C, 108680 | -              | - | Neg |
| M24 | 68.5 - 74.0 C | 86.5 - 90.5 C | 71.74 C, 102003 | -              | - | Neg |
| N10 | 68.5 - 74.0 C | 78.0 - 84.0 C | 71.74 C, 100236 | -              | - | Neg |
| N11 | 68.5 - 74.0 C | 88.0 - 92.5 C | 71.26 C, 79040  | -              | - | Neg |
| N12 | 68.5 - 74.0 C | 86.0 - 91.0 C | -               | 88.11 C, 79300 | - | Pos |
| N19 | 68.5 - 74.0 C | 88.0 - 92.5 C | 71.50 C, 85682  | -              | - | Neg |
| N20 | 68.5 - 74.0 C | 88.0 - 92.0 C | 71.74 C, 107482 | -              | - | Neg |
| N24 | 68.5 - 74.0 C | 88.5 - 92.5 C | 71.50 C, 137901 | -              | - | Neg |
| O1  | 68.5 - 74.0 C | 89.0 - 93.0 C | 71.74 C, 111949 | -              | - | Neg |
| P18 | 68.5 - 74.0 C | 88.0 - 92.0 C | 71.50 C, 90560  | -              | - | Neg |
| P19 | 68.5 - 74.0 C | 88.0 - 92.5 C | 71.50 C, 92946  | -              | - | Neg |

The HLA-B test consists of wells B23-O9.

| Well | Neg Tm Range  | Pos Tm Range  | Negative Peak   | Positive Peak | Peak Height Ratio | Call | Note |
|------|---------------|---------------|-----------------|---------------|-------------------|------|------|
| B23  | 68.5 - 74.0 C | 84.0 - 89.0 C | 71.50 C, 80589  | -             | -                 | Neg  |      |
| B24  | 68.5 - 74.0 C | 88.0 - 92.0 C | 71.74 C, 100705 | -             | -                 | Neg  |      |
| C1   | 68.5 - 74.0 C | 87.5 - 90.5 C | 71.50 C, 98850  | -             | -                 | Neg  |      |
| C2   | 68.5 - 74.0 C | 87.0 - 91.0 C | 71.50 C, 101665 | -             | -                 | Neg  |      |
| C3   | 68.5 - 74.0 C | 84.5 - 88.5 C | 71.50 C, 98485  | -             | -                 | Neg  |      |
| C4   | 68.5 - 74.0 C | 88.5 - 93.0 C | 71.74 C, 98032  | -             | -                 | Neg  |      |
| C5   | 68.5 - 74.0 C | 89.0 - 93.0 C | 71.74 C, 98882  | -             | -                 | Neg  |      |
| C6   | 68.5 - 74.0 C | 87.0 - 91.5 C | 71.26 C, 86294  | -             | -                 | Neg  |      |
| C7   | 68.5 - 74.0 C | 89.0 - 94.0 C | 71.50 C, 87908  | -             | -                 | Neg  |      |
| C8   | 68.5 - 74.0 C | 89.0 - 93.5 C | 71.74 C, 110088 | -             | -                 | Neg  |      |
| C9   | 68.5 - 74.0 C | 81.0 - 89.0 C | 71.74 C, 93643  | -             | -                 | Neg  |      |
| C10  | 68.5 - 74.0 C | 82.5 - 88.5 C | 71.98 C, 98693  | -             | -                 | Neg  |      |
| C11  | 68.5 - 74.0 C | 83.0 - 87.0 C | 71.50 C, 108000 | -             | -                 | Neg  |      |
| C12  | 68.5 - 74.0 C | 83.5 - 89.0 C | 71.50 C, 106955 | -             | -                 | Neg  |      |
| C13  | 68.5 - 74.0 C | 83.0 - 88.0 C | 71.74 C, 107383 | -             | -                 | Neg  |      |
| C14  | 68.5 - 74.0 C | 84.5 - 90.0 C | 71.50 C, 96479  | -             | -                 | Neg  |      |
| C15  | 68.5 - 74.0 C | 89.0 - 93.0 C | 71.74 C, 104007 | -             | -                 | Neg  |      |
| C16  | 68.5 - 74.0 C | 87.0 - 91.5 C | 71.26 C, 62614  | -             | -                 | Neg  |      |
| C17  | 68.5 - 74.0 C | 78.5 - 84.0 C | 71.74 C, 97940  | -             | -                 | Neg  |      |
| C18  | 68.5 - 74.0 C | 88.0 - 93.0 C | 71.74 C, 106831 | -             | -                 | Neg  |      |
| C19  | 68.5 - 74.0 C | 89.0 - 93.0 C | 71.26 C, 110074 | -             | -                 | Neg  |      |
| C20  | 68.5 - 74.0 C | 88.5 - 93.0 C | 71.74 C, 108301 | -             | -                 | Neg  |      |
| C21  | 68.5 - 74.0 C | 89.0 - 94.0 C | 71.26 C, 122330 | -             | -                 | Neg  |      |
| C22  | 68.5 - 74.0 C | 79.5 - 85.5 C | 71.74 C, 114025 | -             | -                 | Neg  |      |
| C23  | 68.5 - 74.0 C | 89.0 - 93.5 C | 71.74 C, 112032 | -             | -                 | Neg  |      |
| C24  | 68.5 - 74.0 C | 89.0 - 93.0 C | 71.50 C, 108249 | -             | -                 | Neg  |      |
| D1   | 68.5 - 74.0 C | 83.0 - 87.5 C | 71.74 C, 84586  | -             | -                 | Neg  |      |
| D2   | 68.5 - 74.0 C | 85.5 - 90.0 C | 71.50 C, 98857  | -             | -                 | Neg  |      |
| D3   | 68.5 - 74.0 C | 83.5 - 88.0 C | 71.26 C, 92148  | -             | -                 | Neg  |      |
| D4   | 68.5 - 74.0 C | 88.0 - 93.5 C | 71.50 C, 88732  | -             | -                 | Neg  |      |
| D5   | 68.5 - 74.0 C | 83.0 - 88.5 C | 71.02 C, 93373  | -             | -                 | Neg  |      |
| D6   | 68.5 - 74.0 C | 89.5 - 93.0 C | 71.74 C, 95392  | -             | -                 | Neg  |      |
| D7   | 68.5 - 74.0 C | 82.0 - 86.0 C | 71.26 C, 89235  | -             | -                 | Neg  |      |
| D8   | 68.5 - 74.0 C | 82.0 - 86.5 C | 70.54 C, 67056  | -             | -                 | Neg  |      |

|     |               |               |                 |                |   |     |
|-----|---------------|---------------|-----------------|----------------|---|-----|
| D9  | 68.5 - 74.0 C | 86.0 - 90.0 C | 71.26 C, 92462  | -              | - | Neg |
| D10 | 68.5 - 74.0 C | 87.0 - 92.0 C | 71.98 C, 102402 | -              | - | Neg |
| D11 | 68.5 - 74.0 C | 86.5 - 91.5 C | 71.50 C, 123816 | -              | - | Neg |
| D12 | 68.5 - 74.0 C | 89.5 - 93.0 C | 71.50 C, 79427  | -              | - | Neg |
| D13 | 68.5 - 74.0 C | 89.0 - 93.0 C | 71.50 C, 84965  | -              | - | Neg |
| D14 | 68.5 - 74.0 C | 85.0 - 90.5 C | 71.74 C, 117520 | -              | - | Neg |
| D15 | 68.5 - 74.0 C | 89.0 - 93.0 C | 71.74 C, 112792 | -              | - | Neg |
| D16 | 68.5 - 74.0 C | 89.0 - 93.0 C | 71.74 C, 103006 | -              | - | Neg |
| D17 | 68.5 - 74.0 C | 89.5 - 93.0 C | 71.50 C, 124092 | -              | - | Neg |
| D18 | 68.5 - 74.0 C | 89.5 - 93.0 C | 71.74 C, 97852  | -              | - | Neg |
| D19 | 68.5 - 74.0 C | 89.0 - 93.0 C | 71.50 C, 95046  | -              | - | Neg |
| D20 | 68.5 - 74.0 C | 83.0 - 89.0 C | 71.50 C, 120010 | -              | - | Neg |
| D21 | 68.5 - 74.0 C | 89.5 - 93.0 C | 71.74 C, 100801 | -              | - | Neg |
| D22 | 68.5 - 74.0 C | 89.5 - 93.0 C | 71.50 C, 123116 | -              | - | Neg |
| D23 | 68.5 - 74.0 C | 89.5 - 93.0 C | 71.50 C, 117948 | -              | - | Neg |
| D24 | 68.5 - 74.0 C | 89.0 - 94.5 C | 71.74 C, 91265  | -              | - | Neg |
| E1  | 68.5 - 74.0 C | 83.0 - 88.5 C | -               | 86.18 C, 77424 | - | Pos |
| E2  | 68.5 - 74.0 C | 88.5 - 93.0 C | -               | 91.72 C, 44426 | - | Pos |
| E3  | 68.5 - 74.0 C | 83.0 - 88.0 C | -               | 85.70 C, 80588 | - | Pos |
| E4  | 68.5 - 74.0 C | 90.0 - 93.0 C | 71.74 C, 89918  | -              | - | Neg |
| E5  | 68.5 - 74.0 C | 83.0 - 88.5 C | 71.74 C, 90779  | -              | - | Neg |
| E6  | 68.5 - 74.0 C | 89.5 - 93.0 C | 71.50 C, 107700 | -              | - | Neg |
| E7  | 68.5 - 74.0 C | 89.0 - 93.0 C | 71.26 C, 109558 | -              | - | Neg |
| E8  | 68.5 - 74.0 C | 87.5 - 92.0 C | 71.50 C, 103292 | -              | - | Neg |
| E9  | 68.5 - 74.0 C | 79.0 - 83.0 C | 71.02 C, 90201  | -              | - | Neg |
| E10 | 68.5 - 74.0 C | 84.5 - 90.0 C | 71.50 C, 111273 | -              | - | Neg |
| E11 | 68.5 - 74.0 C | 89.5 - 93.0 C | 71.02 C, 117862 | -              | - | Neg |
| E12 | 68.5 - 74.0 C | 83.0 - 88.5 C | 71.50 C, 117970 | -              | - | Neg |
| E13 | 68.5 - 74.0 C | 89.0 - 93.0 C | 71.50 C, 120914 | -              | - | Neg |
| E14 | 68.5 - 74.0 C | 89.5 - 93.0 C | 71.50 C, 108573 | -              | - | Neg |
| E15 | 68.5 - 74.0 C | 89.0 - 93.0 C | 71.50 C, 113143 | -              | - | Neg |
| E16 | 68.5 - 74.0 C | 86.5 - 92.0 C | 71.26 C, 122961 | -              | - | Neg |
| E17 | 68.5 - 74.0 C | 89.0 - 93.0 C | 71.74 C, 103255 | -              | - | Neg |
| E18 | 68.5 - 74.0 C | 89.5 - 93.0 C | 71.50 C, 112013 | -              | - | Neg |
| E19 | 68.5 - 74.0 C | 89.0 - 94.5 C | 71.50 C, 104217 | -              | - | Neg |
| E20 | 68.5 - 74.0 C | 89.5 - 93.0 C | 71.50 C, 89348  | -              | - | Neg |
| E21 | 68.5 - 74.0 C | 90.0 - 93.0 C | 71.74 C, 104062 | -              | - | Neg |
| E22 | 68.5 - 74.0 C | 86.0 - 90.0 C | 71.50 C, 86160  | -              | - | Neg |
| E23 | 68.5 - 74.0 C | 84.0 - 89.5 C | 71.50 C, 101051 | -              | - | Neg |
| E24 | 68.5 - 74.0 C | 87.5 - 92.5 C | 71.74 C, 94196  | -              | - | Neg |
| F1  | 68.5 - 74.0 C | 84.5 - 90.0 C | 71.50 C, 108869 | -              | - | Neg |
| F2  | 68.5 - 74.0 C | 83.0 - 87.5 C | -               | -              | - | Neg |
| F3  | 68.5 - 74.0 C | 86.0 - 92.0 C | 71.50 C, 80437  | -              | - | Neg |
| F4  | 68.5 - 74.0 C | 89.5 - 93.0 C | 71.50 C, 99113  | -              | - | Neg |
| F5  | 68.5 - 74.0 C | 89.0 - 93.0 C | 71.74 C, 94054  | -              | - | Neg |
| F6  | 68.5 - 74.0 C | 83.0 - 87.5 C | 71.50 C, 109064 | -              | - | Neg |
| F7  | 68.5 - 74.0 C | 82.5 - 87.5 C | 71.50 C, 93184  | -              | - | Neg |
| F8  | 68.5 - 74.0 C | 88.0 - 92.5 C | 71.74 C, 97621  | -              | - | Neg |
| F9  | 68.5 - 74.0 C | 89.5 - 93.0 C | 71.50 C, 103030 | -              | - | Neg |
| F10 | 68.5 - 74.0 C | 89.0 - 93.0 C | 71.50 C, 117201 | -              | - | Neg |
| F11 | 68.5 - 74.0 C | 86.5 - 92.0 C | 71.98 C, 74194  | -              | - | Neg |
| N1  | 68.5 - 74.0 C | 83.0 - 87.5 C | 71.50 C, 104804 | -              | - | Neg |
| N2  | 68.5 - 74.0 C | 86.0 - 92.0 C | 71.74 C, 92142  | -              | - | Neg |
| N3  | 68.5 - 74.0 C | 83.0 - 88.5 C | 71.98 C, 99611  | -              | - | Neg |



|     |               |               |                 |   |   |     |  |
|-----|---------------|---------------|-----------------|---|---|-----|--|
| N4  | 68.5 - 74.0 C | 89.5 - 93.0 C | 71.74 C, 109288 | - | - | Neg |  |
| N5  | 68.5 - 74.0 C | 89.5 - 93.0 C | 71.26 C, 111739 | - | - | Neg |  |
| N6  | 68.5 - 74.0 C | 87.0 - 91.0 C | 71.74 C, 118857 | - | - | Neg |  |
| N7  | 68.5 - 74.0 C | 89.5 - 93.0 C | 71.74 C, 87123  | - | - | Neg |  |
| N8  | 68.5 - 74.0 C | 89.0 - 93.0 C | 71.98 C, 98240  | - | - | Neg |  |
| N9  | 68.5 - 74.0 C | 82.0 - 86.0 C | 71.50 C, 103517 | - | - | Neg |  |
| N13 | 68.5 - 74.0 C | 89.0 - 94.5 C | 71.50 C, 114467 | - | - | Neg |  |
| N14 | 68.5 - 74.0 C | 83.0 - 87.5 C | 70.05 C, 15502  | - | - | Neg |  |
| N15 | 68.5 - 74.0 C | 82.5 - 87.5 C | 71.74 C, 92439  | - | - | Neg |  |
| N16 | 68.5 - 74.0 C | 88.0 - 92.5 C | 71.98 C, 110407 | - | - | Neg |  |
| N17 | 68.5 - 74.0 C | 87.0 - 91.5 C | 71.26 C, 97091  | - | - | Neg |  |
| N18 | 68.5 - 74.0 C | 87.5 - 90.5 C | 71.74 C, 118483 | - | - | Neg |  |
| O2  | 68.5 - 74.0 C | 83.0 - 88.5 C | 71.02 C, 82720  | - | - | Neg |  |
| O3  | 68.5 - 74.0 C | 90.0 - 93.0 C | 71.98 C, 98056  | - | - | Neg |  |
| O4  | 68.5 - 74.0 C | 81.0 - 89.0 C | 71.50 C, 75802  | - | - | Neg |  |
| O5  | 68.5 - 74.0 C | 87.0 - 91.5 C | 71.26 C, 51947  | - | - | Neg |  |
| O6  | 68.5 - 74.0 C | 78.5 - 84.0 C | 71.98 C, 101322 | - | - | Neg |  |
| O7  | 68.5 - 74.0 C | 88.5 - 93.0 C | 71.98 C, 101701 | - | - | Neg |  |
| O8  | 68.5 - 74.0 C | 85.5 - 90.0 C | 71.74 C, 109162 | - | - | Neg |  |
| O9  | 68.5 - 74.0 C | 83.5 - 88.0 C | 71.50 C, 91505  | - | - | Neg |  |

The Bw test consists of wells F12-F13.

| Well | Neg Tm Range  | Pos Tm Range  | Negative Peak  | Positive Peak  | Peak Height Ratio | Call | Note |
|------|---------------|---------------|----------------|----------------|-------------------|------|------|
| F12  | 68.5 - 74.0 C | 88.5 - 93.0 C | -              | 90.75 C, 63512 | -                 | Pos  |      |
| F13  | 68.5 - 74.0 C | 88.0 - 93.0 C | 71.74 C, 92338 | -              | -                 | Neg  |      |

The HLA-C test consists of wells F14-O18.

| Well | Neg Tm Range  | Pos Tm Range  | Negative Peak   | Positive Peak  | Peak Height Ratio | Call | Note |
|------|---------------|---------------|-----------------|----------------|-------------------|------|------|
| F14  | 68.5 - 74.0 C | 87.0 - 92.0 C | 71.98 C, 96144  | -              | -                 | Neg  |      |
| F15  | 68.5 - 74.0 C | 88.0 - 93.0 C | 71.98 C, 106499 | -              | -                 | Neg  |      |
| F16  | 68.5 - 74.0 C | 84.0 - 89.5 C | 71.50 C, 103766 | -              | -                 | Neg  |      |
| F17  | 68.5 - 74.0 C | 88.0 - 93.0 C | 71.74 C, 106567 | -              | -                 | Neg  |      |
| F18  | 68.5 - 74.0 C | 87.0 - 91.5 C | 71.74 C, 106681 | -              | -                 | Neg  |      |
| F19  | 68.5 - 74.0 C | 88.5 - 93.0 C | 71.26 C, 66799  | -              | -                 | Neg  |      |
| F20  | 68.5 - 74.0 C | 88.0 - 93.0 C | 71.50 C, 112841 | -              | -                 | Neg  |      |
| F21  | 68.5 - 74.0 C | 83.5 - 89.0 C | 71.50 C, 106510 | -              | -                 | Neg  |      |
| F22  | 68.5 - 74.0 C | 86.5 - 92.0 C | 71.74 C, 106005 | -              | -                 | Neg  |      |
| F23  | 68.5 - 74.0 C | 80.0 - 84.5 C | 71.50 C, 122659 | -              | -                 | Neg  |      |
| F24  | 68.5 - 74.0 C | 87.0 - 92.0 C | 71.50 C, 130716 | -              | -                 | Neg  |      |
| G1   | 68.5 - 74.0 C | 86.5 - 92.0 C | -               | 88.83 C, 58995 | -                 | Pos  |      |
| G2   | 68.5 - 74.0 C | 88.5 - 93.5 C | -               | 90.51 C, 47189 | -                 | Pos  |      |
| G3   | 68.5 - 74.0 C | 86.0 - 90.5 C | 71.74 C, 93489  | -              | -                 | Neg  |      |
| G4   | 68.5 - 74.0 C | 88.5 - 93.5 C | 71.50 C, 87909  | -              | -                 | Neg  |      |
| G5   | 68.5 - 74.0 C | 88.0 - 93.0 C | 71.26 C, 66442  | -              | -                 | Neg  |      |
| G6   | 68.5 - 74.0 C | 81.0 - 87.5 C | 71.74 C, 102442 | -              | -                 | Neg  |      |
| G7   | 68.5 - 74.0 C | 84.5 - 90.0 C | 71.02 C, 66197  | -              | -                 | Neg  |      |
| G8   | 68.5 - 74.0 C | 88.0 - 93.0 C | 71.02 C, 95479  | -              | -                 | Neg  |      |
| G9   | 68.5 - 74.0 C | 83.0 - 89.0 C | 71.26 C, 71547  | -              | -                 | Neg  |      |
| G10  | 68.5 - 74.0 C | 86.5 - 92.0 C | 71.02 C, 51792  | -              | -                 | Neg  |      |
| G11  | 68.5 - 74.0 C | 88.0 - 93.5 C | 71.74 C, 100345 | -              | -                 | Neg  |      |
| G12  | 68.5 - 74.0 C | 86.5 - 92.0 C | 71.74 C, 101540 | -              | -                 | Neg  |      |
| G13  | 68.5 - 74.0 C | 86.0 - 90.0 C | -               | 87.62 C, 88117 | -                 | Pos  |      |
| G14  | 68.5 - 74.0 C | 86.0 - 92.0 C | 71.50 C, 89888  | -              | -                 | Neg  |      |

|     |               |               |                 |                |   |     |
|-----|---------------|---------------|-----------------|----------------|---|-----|
| G15 | 68.5 - 74.0 C | 88.0 - 93.0 C | 71.74 C, 80143  | -              | - | Neg |
| G16 | 68.5 - 74.0 C | 89.0 - 93.0 C | 71.02 C, 148553 | -              | - | Neg |
| G17 | 68.5 - 74.0 C | 85.0 - 90.0 C | 71.26 C, 102013 | -              | - | Neg |
| G18 | 68.5 - 74.0 C | 88.5 - 93.0 C | 71.74 C, 107977 | -              | - | Neg |
| G19 | 68.5 - 74.0 C | 86.0 - 91.0 C | 71.50 C, 107063 | -              | - | Neg |
| G20 | 68.5 - 74.0 C | 88.5 - 92.5 C | 71.50 C, 98264  | -              | - | Neg |
| G21 | 68.5 - 74.0 C | 87.0 - 91.5 C | 70.78 C, 82282  | -              | - | Neg |
| G22 | 68.5 - 74.0 C | 88.5 - 93.0 C | 71.02 C, 80931  | -              | - | Neg |
| G23 | 68.5 - 74.0 C | 88.0 - 92.5 C | 71.74 C, 105641 | -              | - | Neg |
| G24 | 68.5 - 74.0 C | 88.5 - 92.5 C | 71.74 C, 113361 | -              | - | Neg |
| H1  | 68.5 - 74.0 C | 88.0 - 93.0 C | 71.26 C, 89839  | -              | - | Neg |
| H2  | 68.5 - 74.0 C | 83.0 - 89.0 C | 71.50 C, 77128  | -              | - | Neg |
| H3  | 68.5 - 74.0 C | 90.0 - 94.0 C | 71.26 C, 98208  | -              | - | Neg |
| O10 | 68.5 - 74.0 C | 87.0 - 92.0 C | 71.98 C, 99356  | -              | - | Neg |
| O11 | 68.5 - 74.0 C | 88.0 - 93.0 C | 71.98 C, 101209 | -              | - | Neg |
| O12 | 68.5 - 74.0 C | 88.5 - 92.5 C | 71.98 C, 104953 | -              | - | Neg |
| O13 | 68.5 - 74.0 C | 87.0 - 92.0 C | 71.50 C, 127840 | -              | - | Neg |
| O14 | 68.5 - 74.0 C | 88.5 - 93.5 C | -               | 90.75 C, 58033 | - | Pos |
| O15 | 68.5 - 74.0 C | 86.0 - 90.5 C | 71.98 C, 99699  | -              | - | Neg |
| O16 | 68.5 - 74.0 C | 84.5 - 90.0 C | 71.02 C, 66326  | -              | - | Neg |
| O17 | 68.5 - 74.0 C | 88.0 - 92.5 C | 71.98 C, 106113 | -              | - | Neg |
| O18 | 68.5 - 74.0 C | 89.0 - 93.0 C | 71.50 C, 130098 | -              | - | Neg |

The HLA-DRB1 test consists of wells H4-P17.

| Well | Neg Tm Range  | Pos Tm Range  | Negative Peak   | Positive Peak   | Peak Height Ratio     | Call | Note |
|------|---------------|---------------|-----------------|-----------------|-----------------------|------|------|
| H4   | 68.5 - 74.0 C | 84.5 - 91.0 C | 71.74 C, 93165  | -               | -                     | Neg  |      |
| H5   | 68.5 - 74.0 C | 84.0 - 90.0 C | 71.50 C, 102323 | -               | -                     | Neg  |      |
| H6   | 68.5 - 74.0 C | 81.5 - 86.5 C | 71.74 C, 100400 | -               | -                     | Neg  |      |
| H7   | 68.5 - 74.0 C | 78.5 - 83.0 C | 71.74 C, 101442 | -               | -                     | Neg  |      |
| H8   | 68.5 - 74.0 C | 75.5 - 82.5 C | -               | 79.20 C, 92237  | -                     | Pos  |      |
| H9   | 68.5 - 74.0 C | 85.5 - 90.0 C | 71.74 C, 103744 | -               | -                     | Neg  |      |
| H10  | 69.5 - 75.5 C | 77.0 - 83.0 C | 71.74 C, 96141  | -               | -                     | Neg  |      |
| H11  | 68.5 - 74.0 C | 85.5 - 90.0 C | 71.98 C, 107455 | -               | -                     | Neg  |      |
| H12  | 68.5 - 74.0 C | 84.5 - 90.0 C | 71.50 C, 83282  | -               | -                     | Neg  |      |
| H13  | 68.5 - 74.0 C | 86.0 - 90.0 C | 71.50 C, 119458 | -               | -                     | Neg  |      |
| H14  | 68.5 - 74.0 C | 84.0 - 90.5 C | -               | 86.18 C, 88746  | -                     | Pos  |      |
| H15  | 68.5 - 74.0 C | 83.5 - 88.5 C | -               | 85.94 C, 102113 | -                     | Pos  |      |
| H16  | 68.5 - 74.0 C | 85.0 - 91.0 C | 71.98 C, 102572 | -               | -                     | Neg  |      |
| H17  | 68.5 - 74.0 C | 79.5 - 84.0 C | 71.98 C, 106903 | -               | -                     | Neg  |      |
| H18  | 68.5 - 74.0 C | 86.0 - 91.5 C | 71.74 C, 106655 | -               | -                     | Neg  |      |
| H19  | 68.5 - 74.0 C | 86.0 - 90.5 C | 71.50 C, 113389 | -               | -                     | Neg  |      |
| H20  | 68.5 - 74.0 C | 85.0 - 89.5 C | 71.98 C, 107479 | -               | -                     | Neg  |      |
| H21  | 68.5 - 74.0 C | 86.0 - 90.0 C | 71.26 C, 93392  | -               | -                     | Neg  |      |
| H22  | 68.5 - 74.0 C | 83.5 - 88.5 C | 71.74 C, 111327 | -               | -                     | Neg  |      |
| H23  | 68.5 - 74.0 C | 86.0 - 90.5 C | 71.50 C, 103872 | -               | -                     | Neg  |      |
| H24  | 68.5 - 74.0 C | 85.0 - 89.5 C | 71.74 C, 107869 | -               | -                     | Neg  |      |
| I1   | 68.5 - 74.0 C | 82.5 - 87.0 C | 71.50 C, 99612  | -               | -                     | Neg  |      |
| I2   | 68.5 - 74.0 C | 78.5 - 82.5 C | 69.81 C, 12362  | 80.16 C, 110485 | 8.94 (> 1.00 pos min) | Pos  |      |
| I3   | 68.5 - 74.0 C | 85.5 - 89.5 C | 71.26 C, 77935  | -               | -                     | Neg  |      |
| I4   | 68.5 - 74.0 C | 86.0 - 90.0 C | 70.54 C, 40475  | 86.90 C, 40030  | 0.99 (< 1.50 neg max) | Neg  |      |
| I5   | 68.5 - 74.0 C | 86.5 - 90.5 C | 71.26 C, 100840 | -               | -                     | Neg  |      |
| I6   | 68.5 - 74.0 C | 84.5 - 89.5 C | 71.50 C, 113265 | -               | -                     | Neg  |      |
| I7   | 68.5 - 74.0 C | 86.0 - 89.5 C | 71.26 C, 105046 | -               | -                     | Neg  |      |
| I8   | 68.5 - 74.0 C | 86.0 - 89.5 C | -               | 87.14 C, 84883  | -                     | Pos  |      |

|     |               |               |                 |                |                       |     |
|-----|---------------|---------------|-----------------|----------------|-----------------------|-----|
| I9  | 68.5 - 74.0 C | 78.0 - 83.5 C | 71.74 C, 109165 | -              | -                     | Neg |
| I10 | 68.5 - 74.0 C | 81.5 - 85.5 C | 71.50 C, 116343 | -              | -                     | Neg |
| I11 | 68.5 - 74.0 C | 87.0 - 90.5 C | 70.78 C, 98327  | -              | -                     | Neg |
| I12 | 68.5 - 74.0 C | 82.0 - 87.0 C | 71.98 C, 105288 | -              | -                     | Neg |
| I13 | 68.5 - 74.0 C | 86.0 - 91.0 C | 71.50 C, 77680  | -              | -                     | Neg |
| I14 | 68.5 - 74.0 C | 85.0 - 90.0 C | 71.50 C, 106122 | 87.62 C, 15836 | 0.15 (< 1.00 neg max) | Neg |
| I15 | 68.5 - 74.0 C | 85.5 - 90.0 C | 71.74 C, 110525 | -              | -                     | Neg |
| I16 | 68.5 - 74.0 C | 85.0 - 90.0 C | 71.98 C, 109002 | -              | -                     | Neg |
| I17 | 69.5 - 75.5 C | 85.0 - 90.0 C | 71.50 C, 122899 | -              | -                     | Neg |
| I18 | 68.5 - 74.0 C | 78.0 - 82.5 C | 71.74 C, 108571 | -              | -                     | Neg |
| N22 | 68.5 - 74.0 C | 81.5 - 85.5 C | 71.74 C, 118143 | -              | -                     | Neg |
| N23 | 68.5 - 74.0 C | 87.0 - 90.5 C | 70.78 C, 112361 | -              | -                     | Neg |
| P8  | 68.5 - 74.0 C | 85.5 - 90.0 C | 71.98 C, 95043  | -              | -                     | Neg |
| P9  | 68.5 - 74.0 C | 78.5 - 83.0 C | 71.74 C, 107302 | -              | -                     | Neg |
| P10 | 68.5 - 74.0 C | 75.5 - 82.5 C | -               | 79.44 C, 94553 | -                     | Pos |
| P11 | 68.5 - 74.0 C | 85.5 - 90.0 C | 71.98 C, 99354  | -              | -                     | Neg |
| P12 | 68.5 - 74.0 C | 78.0 - 83.5 C | 71.74 C, 111228 | -              | -                     | Neg |
| P13 | 68.5 - 74.0 C | 86.0 - 89.5 C | 71.26 C, 116458 | -              | -                     | Neg |
| P14 | 68.5 - 74.0 C | 82.0 - 87.0 C | 71.98 C, 109780 | -              | -                     | Neg |
| P16 | 68.5 - 74.0 C | 83.5 - 88.5 C | 71.74 C, 99380  | -              | -                     | Neg |
| P17 | 68.5 - 74.0 C | 78.0 - 82.5 C | 71.98 C, 108184 | -              | -                     | Neg |

**The HLA-DRB345 test consists of wells I19-P23.**

| Well | Neg Tm Range  | Pos Tm Range  | Negative Peak    | Positive Peak    | Peak Height Ratio     | Call | Note |
|------|---------------|---------------|------------------|------------------|-----------------------|------|------|
| I19  | 68.5 - 74.0 C | 86.0 - 90.5 C | 71.98 C, 109407  | -                | -                     | Neg  |      |
| I20  | 68.5 - 74.0 C | 82.5 - 86.5 C | 71.74 C, 100869  | -                | -                     | Neg  |      |
| I21  | 68.5 - 74.0 C | 85.0 - 90.0 C | 71.74 C, 105748  | -                | -                     | Neg  |      |
| I22  | 68.5 - 74.0 C | 79.5 - 84.0 C | 71.02 C, 91381   | -                | -                     | Neg  |      |
| I23  | 68.5 - 74.0 C | 79.0 - 84.0 C | 71.50 C, 105287  | -                | -                     | Neg  |      |
| I24  | 68.5 - 74.0 C | 85.0 - 90.0 C | -                | 87.38 C, 66296   | -                     | Pos  |      |
| J1   | 68.5 - 74.0 C | 86.0 - 90.5 C | 71.74 C, 97266   | -                | -                     | Neg  |      |
| J2   | 68.5 - 74.0 C | 85.0 - 90.0 C | 70.78 C, 75055   | 87.87 C, 9162.90 | 0.12 (< 1.00 neg max) | Neg  |      |
| J3   | 68.5 - 74.0 C | 83.5 - 88.5 C | 69.81 C, 7681.85 | 86.18 C, 64370   | 8.38 (> 2.00 pos min) | Pos  |      |
| J4   | 68.5 - 74.0 C | 80.0 - 84.5 C | 69.81 C, 12336   | 82.33 C, 84932   | 6.88 (> 2.00 pos min) | Pos  |      |
| J5   | 68.5 - 74.0 C | 79.0 - 83.0 C | 71.50 C, 93698   | -                | -                     | Neg  |      |
| J6   | 68.5 - 74.0 C | 78.5 - 83.0 C | 71.74 C, 102205  | -                | -                     | Neg  |      |
| J7   | 68.5 - 74.0 C | 80.5 - 85.0 C | -                | 82.09 C, 125024  | -                     | Pos  |      |
| J8   | 68.5 - 74.0 C | 83.5 - 88.0 C | 71.74 C, 101294  | -                | -                     | Neg  |      |
| J9   | 68.5 - 74.0 C | 80.0 - 85.0 C | 71.74 C, 98741   | -                | -                     | Neg  |      |
| P20  | 68.5 - 74.0 C | 86.0 - 90.5 C | 71.98 C, 98589   | -                | -                     | Neg  |      |
| P21  | 68.5 - 74.0 C | 85.0 - 90.0 C | -                | 87.38 C, 73150   | -                     | Pos  |      |
| P22  | 68.5 - 74.0 C | 78.5 - 83.0 C | 71.74 C, 111078  | -                | -                     | Neg  |      |
| P23  | 68.5 - 74.0 C | 80.5 - 85.0 C | -                | 82.33 C, 128438  | -                     | Pos  |      |

**The HLA-DQA1 test consists of wells J10-P1.**

| Well | Neg Tm Range  | Pos Tm Range  | Negative Peak   | Positive Peak   | Peak Height Ratio | Call | Note |
|------|---------------|---------------|-----------------|-----------------|-------------------|------|------|
| J10  | 68.5 - 74.0 C | 79.5 - 84.0 C | 71.74 C, 84552  | -               | -                 | Neg  |      |
| J11  | 68.5 - 74.0 C | 79.0 - 84.0 C | -               | 81.13 C, 103170 | -                 | Pos  |      |
| J12  | 68.5 - 74.0 C | 79.5 - 83.5 C | 71.50 C, 89464  | -               | -                 | Neg  |      |
| J13  | 68.5 - 74.0 C | 79.5 - 84.0 C | 71.74 C, 118130 | -               | -                 | Neg  |      |
| J14  | 68.5 - 74.0 C | 78.0 - 83.0 C | -               | 81.37 C, 123957 | -                 | Pos  |      |
| J15  | 68.5 - 74.0 C | 78.5 - 83.5 C | 71.98 C, 76857  | -               | -                 | Neg  |      |
| J16  | 68.5 - 74.0 C | 80.5 - 84.5 C | 71.74 C, 115838 | -               | -                 | Neg  |      |

|     |               |               |                |                |   |     |  |
|-----|---------------|---------------|----------------|----------------|---|-----|--|
| O24 | 68.5 - 74.0 C | 79.5 - 84.0 C | 71.98 C, 96108 | -              | - | Neg |  |
| P1  | 68.5 - 74.0 C | 79.0 - 84.0 C | -              | 81.13 C, 96155 | - | Pos |  |

The HLA-DQB1 test consists of wells J17-P15.

| Well | Neg Tm Range  | Pos Tm Range  | Negative Peak   | Positive Peak   | Peak Height Ratio     | Call | Note |
|------|---------------|---------------|-----------------|-----------------|-----------------------|------|------|
| J17  | 68.5 - 74.0 C | 77.5 - 82.5 C | 71.74 C, 108448 | -               | -                     | Neg  |      |
| J18  | 68.5 - 74.0 C | 81.5 - 86.0 C | -               | 83.77 C, 123840 | -                     | Pos  |      |
| J19  | 68.5 - 74.0 C | 86.0 - 91.5 C | 69.81 C, 16927  | 88.35 C, 71625  | 4.23 (> 1.25 pos min) | Pos  |      |
| J20  | 68.5 - 74.0 C | 85.0 - 91.0 C | -               | 87.14 C, 89704  | -                     | Pos  |      |
| J21  | 68.5 - 74.0 C | 80.0 - 86.5 C | 71.26 C, 117458 | -               | -                     | Neg  |      |
| J22  | 68.5 - 74.0 C | 85.0 - 90.5 C | 69.81 C, 10860  | 87.14 C, 84307  | 7.76 (> 3.00 pos min) | Pos  |      |
| J23  | 68.5 - 74.0 C | 85.0 - 89.0 C | -               | 87.14 C, 129690 | -                     | Pos  |      |
| J24  | 68.5 - 74.0 C | 85.5 - 90.5 C | 71.50 C, 103065 | -               | -                     | Neg  |      |
| K1   | 68.5 - 74.0 C | 84.5 - 90.0 C | 71.74 C, 98316  | -               | -                     | Neg  |      |
| K2   | 68.5 - 74.0 C | 84.5 - 90.0 C | 71.74 C, 108021 | -               | -                     | Neg  |      |
| K3   | 68.5 - 74.0 C | 80.0 - 85.0 C | 71.74 C, 94914  | -               | -                     | Neg  |      |
| K4   | 68.5 - 74.0 C | 85.0 - 90.0 C | 71.50 C, 120200 | -               | -                     | Neg  |      |
| K5   | 68.5 - 74.0 C | 86.5 - 91.0 C | 71.02 C, 91911  | -               | -                     | Neg  |      |
| K6   | 68.5 - 74.0 C | 79.0 - 84.0 C | 71.50 C, 126754 | -               | -                     | Neg  |      |
| N21  | 68.5 - 74.0 C | 80.0 - 86.5 C | 71.50 C, 122735 | -               | -                     | Neg  |      |
| P2   | 68.5 - 74.0 C | 86.0 - 91.5 C | -               | 88.59 C, 59392  | -                     | Pos  |      |
| P3   | 68.5 - 74.0 C | 85.0 - 91.0 C | -               | 87.14 C, 74088  | -                     | Pos  |      |
| P4   | 68.5 - 74.0 C | 85.0 - 90.0 C | 71.98 C, 98038  | -               | -                     | Neg  |      |
| P5   | 68.5 - 74.0 C | 84.5 - 90.0 C | 71.98 C, 101225 | -               | -                     | Neg  |      |
| P6   | 68.5 - 74.0 C | 80.0 - 85.0 C | 71.74 C, 91770  | -               | -                     | Neg  |      |
| P7   | 68.5 - 74.0 C | 86.5 - 91.0 C | 71.50 C, 88088  | -               | -                     | Neg  |      |
| P15  | 68.5 - 74.0 C | 77.5 - 82.5 C | 71.98 C, 102175 | -               | -                     | Neg  |      |

The HLA-DPA1 test consists of wells K7-K11.

| Well | Neg Tm Range  | Pos Tm Range  | Negative Peak   | Positive Peak   | Peak Height Ratio | Call | Note |
|------|---------------|---------------|-----------------|-----------------|-------------------|------|------|
| K7   | 68.5 - 74.0 C | 78.0 - 82.5 C | -               | 80.16 C, 134274 | -                 | Pos  |      |
| K8   | 68.5 - 74.0 C | 80.0 - 84.5 C | 71.50 C, 102960 | -               | -                 | Neg  |      |
| K9   | 68.5 - 74.0 C | 77.5 - 83.0 C | 71.74 C, 93533  | -               | -                 | Neg  |      |
| K10  | 68.5 - 74.0 C | 77.5 - 82.5 C | 71.74 C, 117488 | -               | -                 | Neg  |      |
| K11  | 68.5 - 74.0 C | 77.5 - 83.5 C | 71.50 C, 125195 | -               | -                 | Neg  |      |

The HLA-DPB1 test consists of wells K12-O23.

| Well | Neg Tm Range  | Pos Tm Range  | Negative Peak   | Positive Peak   | Peak Height Ratio | Call | Note |
|------|---------------|---------------|-----------------|-----------------|-------------------|------|------|
| K12  | 68.5 - 74.0 C | 80.0 - 85.0 C | 71.74 C, 100586 | -               | -                 | Neg  |      |
| K13  | 68.5 - 74.0 C | 82.0 - 87.0 C | 71.98 C, 106277 | -               | -                 | Neg  |      |
| K14  | 68.5 - 74.0 C | 84.5 - 89.0 C | 71.98 C, 107940 | -               | -                 | Neg  |      |
| K15  | 68.5 - 74.0 C | 78.5 - 83.5 C | 71.74 C, 110994 | -               | -                 | Neg  |      |
| K16  | 68.5 - 74.0 C | 78.5 - 84.5 C | -               | 82.09 C, 85890  | -                 | Pos  |      |
| K17  | 68.5 - 74.0 C | 84.0 - 89.0 C | 71.74 C, 104288 | -               | -                 | Neg  |      |
| K18  | 68.5 - 74.0 C | 82.0 - 87.0 C | -               | 84.74 C, 124760 | -                 | Pos  |      |
| K19  | 68.5 - 74.0 C | 84.0 - 89.0 C | 71.74 C, 100206 | -               | -                 | Neg  |      |
| K20  | 68.5 - 74.0 C | 81.0 - 87.0 C | 71.26 C, 69509  | -               | -                 | Neg  |      |
| K21  | 68.5 - 74.0 C | 85.0 - 90.0 C | 71.98 C, 106031 | -               | -                 | Neg  |      |
| K22  | 68.5 - 74.0 C | 79.5 - 85.5 C | 71.50 C, 123040 | -               | -                 | Neg  |      |
| K23  | 68.5 - 74.0 C | 76.0 - 82.0 C | 71.74 C, 99946  | -               | -                 | Neg  |      |
| K24  | 68.5 - 74.0 C | 84.0 - 89.0 C | 71.98 C, 103171 | -               | -                 | Neg  |      |
| L1   | 68.5 - 74.0 C | 85.0 - 90.5 C | 71.74 C, 98383  | -               | -                 | Neg  |      |
| L2   | 68.5 - 74.0 C | 78.5 - 82.5 C | 71.74 C, 105033 | -               | -                 | Neg  |      |

|     |               |               |                  |                |                       |     |  |
|-----|---------------|---------------|------------------|----------------|-----------------------|-----|--|
| L3  | 68.5 - 74.0 C | 78.0 - 82.5 C | 70.05 C, 9968.57 | 79.68 C, 87648 | 8.79 (> 1.00 pos min) | Pos |  |
| L4  | 68.5 - 74.0 C | 78.0 - 82.0 C | 71.26 C, 132589  | -              | -                     | Neg |  |
| L5  | 68.5 - 74.0 C | 79.0 - 82.5 C | 71.98 C, 93949   | -              | -                     | Neg |  |
| L6  | 68.5 - 74.0 C | 83.5 - 90.0 C | 71.50 C, 115245  | -              | -                     | Neg |  |
| L7  | 68.5 - 74.0 C | 85.5 - 91.0 C | -                | 88.35 C, 79005 | -                     | Pos |  |
| L8  | 68.5 - 74.0 C | 78.0 - 83.5 C | 71.74 C, 115392  | -              | -                     | Neg |  |
| L9  | 68.5 - 74.0 C | 76.0 - 81.0 C | 71.50 C, 76872   | -              | -                     | Neg |  |
| L10 | 68.5 - 74.0 C | 77.5 - 82.5 C | 71.50 C, 91296   | -              | -                     | Neg |  |
| L11 | 68.5 - 74.0 C | 84.5 - 89.0 C | 71.74 C, 113812  | -              | -                     | Neg |  |
| L12 | 68.5 - 74.0 C | 85.0 - 90.0 C | -                | 88.11 C, 85003 | -                     | Pos |  |
| L13 | 68.5 - 74.0 C | 85.0 - 91.0 C | 71.74 C, 90433   | -              | -                     | Neg |  |
| L14 | 68.5 - 74.0 C | 84.0 - 89.0 C | 71.50 C, 85371   | -              | -                     | Neg |  |
| L15 | 68.5 - 74.0 C | 78.0 - 83.5 C | 71.50 C, 109233  | -              | -                     | Neg |  |
| L16 | 68.5 - 74.0 C | 82.5 - 88.0 C | 71.74 C, 113897  | -              | -                     | Neg |  |
| L17 | 68.5 - 74.0 C | 84.0 - 89.0 C | 71.50 C, 126276  | -              | -                     | Neg |  |
| L18 | 68.5 - 74.0 C | 85.5 - 90.0 C | -                | 88.11 C, 61626 | -                     | Pos |  |
| L19 | 68.5 - 74.0 C | 85.0 - 90.0 C | 71.26 C, 114640  | -              | -                     | Neg |  |
| L20 | 68.5 - 74.0 C | 84.0 - 89.0 C | 71.74 C, 116435  | -              | -                     | Neg |  |
| L21 | 68.5 - 74.0 C | 84.5 - 89.0 C | 71.74 C, 109178  | -              | -                     | Neg |  |
| L22 | 68.5 - 74.0 C | 85.0 - 91.0 C | -                | 88.11 C, 67327 | -                     | Pos |  |
| L23 | 68.5 - 74.0 C | 85.0 - 90.0 C | 71.74 C, 124767  | -              | -                     | Neg |  |
| L24 | 68.5 - 74.0 C | 86.0 - 90.0 C | 71.26 C, 123120  | -              | -                     | Neg |  |
| M1  | 68.5 - 74.0 C | 86.0 - 90.5 C | 71.74 C, 101355  | -              | -                     | Neg |  |
| M2  | 68.5 - 74.0 C | 84.5 - 90.5 C | 71.74 C, 88909   | -              | -                     | Neg |  |
| M3  | 68.5 - 74.0 C | 84.5 - 90.5 C | -                | 88.11 C, 76916 | -                     | Pos |  |
| M4  | 68.5 - 74.0 C | 85.5 - 90.0 C | -                | 87.87 C, 85292 | -                     | Pos |  |
| M5  | 68.5 - 74.0 C | 84.0 - 89.0 C | 71.74 C, 105054  | -              | -                     | Neg |  |
| M6  | 68.5 - 74.0 C | 83.0 - 88.0 C | 71.50 C, 104978  | -              | -                     | Neg |  |
| M7  | 68.5 - 74.0 C | 82.0 - 87.0 C | 71.26 C, 71601   | -              | -                     | Neg |  |
| M8  | 68.5 - 74.0 C | 79.5 - 84.0 C | 71.98 C, 97904   | -              | -                     | Neg |  |
| M9  | 68.5 - 74.0 C | 85.0 - 90.0 C | 71.74 C, 97378   | -              | -                     | Neg |  |
| M10 | 68.5 - 74.0 C | 84.0 - 89.0 C | 71.98 C, 100831  | -              | -                     | Neg |  |
| M11 | 68.5 - 74.0 C | 83.0 - 89.0 C | 71.74 C, 85553   | -              | -                     | Neg |  |
| M12 | 68.5 - 74.0 C | 77.0 - 83.0 C | 71.50 C, 47823   | -              | -                     | Neg |  |
| O19 | 68.5 - 74.0 C | 82.0 - 87.0 C | 71.26 C, 67017   | -              | -                     | Neg |  |
| O20 | 68.5 - 74.0 C | 77.5 - 82.5 C | 71.74 C, 93919   | -              | -                     | Neg |  |
| O21 | 68.5 - 74.0 C | 78.0 - 83.5 C | 71.74 C, 119308  | -              | -                     | Neg |  |
| O22 | 68.5 - 74.0 C | 84.5 - 89.0 C | 71.74 C, 114673  | -              | -                     | Neg |  |
| O23 | 68.5 - 74.0 C | 84.5 - 90.5 C | -                | 88.35 C, 87926 | -                     | Pos |  |

The DNA Quality Control test consists of well A1.

| Well | Neg Tm Range  | Pos Tm Range  | Negative Peak  | Positive Peak  | Peak Height Ratio     | Call | Note |
|------|---------------|---------------|----------------|----------------|-----------------------|------|------|
| A1   | 72.5 - 77.5 C | 77.5 - 83.0 C | 74.39 C, 29595 | 79.68 C, 74342 | 2.51 (> 1.00 pos min) | Pass |      |

The No Template Control test consists of well P24.

| Well | Neg Tm Range | Pos Tm Range  | Negative Peak | Positive Peak | Peak Height Ratio | Call | Note |
|------|--------------|---------------|---------------|---------------|-------------------|------|------|
| P24  | -            | 82.0 - 89.0 C | -             | -             | -                 | Pass |      |

## SESSION HISTORY

- 2/1/2023 2:56 PM admin modified the following kit information:
- Kit Exp Date: 2023-10-14
- 2/1/2023 2:56 PM admin created this session using SureTyper version 6.1.7 build .
- 2/1/2023 2:56 PM admin modified the following patient information:
- Sample ID:20230131
  - Patient ID:WB199
  - Patient Name:Cord, Blood
- 2/1/2023 2:56 PM admin loaded dissociation data for tray 1 (plate ID SX322107-QXD) from file '20230131 WB199 HLA SX322107-QXD melt curve.txt'.
- 2/1/2023 2:56 PM admin analyzed this session using SureTyper version 6.1.7 build with the following set of system preferences:
- For new sessions, use the KIT'S ORIGINAL allele database release.
  - DO display the phenotype as the genotype group for Cw12, Cw14, Cw15, Cw16, Cw17, Cw18.
  - For HLA-DQA1 typings, present the phenotype same as the genotype.
  - For HLA-DPA1 typings, present the phenotype same as the genotype.
  - DO present a warning if haplotypes are inconsistent.
  - DO present a warning if the DNA Quality Control test does not pass.
  - DO present a warning if the No Template Control test does not pass.
  - When a reaction pattern cannot be explained by any combination of alleles, DO NOT ask to attempt to perform what-if pattern analysis.
  - In case of an "incomplete" test result, DO automatically choose the only valid assignment.
  - When the genotype result requires a rare allele assignment, DO ask to attempt to perform what-if pattern analysis.
  - DO perform HaploCheck analysis when possible.
  - In case of an "ambiguous rare" test result, DO NOT automatically choose the only valid test call that does not require the assignment of a rare allele.
- The results for each test were:
- HLA-A: A\*02 A\*02 → A2 A2
  - HLA-B: B\*44 B\*44 → B44 B44
  - Bw: Bw4 Bw4
  - HLA-C: ambiguous rare
  - HLA-DRB1: DRB1\*07 DRB1\*11 → DR7 DR11
  - HLA-DRB345: DRB3\*02 DRB4\*01:03:01:02N → DR52 DR53-Null
  - HLA-DQA1: DQA1\*02 DQA1\*05
  - HLA-DQB1: DQB1\*03 DQB1\*03 → DQ7 DQ9
  - HLA-DPA1: DPA1\*01 DPA1\*01
  - HLA-DPB1: ambiguous rare
  - DQC: Pass
  - NTC: Pass
- Notice: Cannot exclude other combinations. Review all results.
- 2/1/2023 2:57 PM admin reviewed this session and manually chose the test call:  
C\*05 C\*05 → Cw5 Cw5
- Notice: Cannot exclude other combinations. Review all results.

2/1/2023  
2:57 PM

admin analyzed this session using SureTyper version 6.1.7 build with the following set of system preferences:

- For new sessions, use the KIT'S ORIGINAL allele database release.
- DO display the phenotype as the genotype group for Cw12, Cw14, Cw15, Cw16, Cw17, Cw18.
- For HLA-DQA1 typings, present the phenotype same as the genotype.
- For HLA-DPA1 typings, present the phenotype same as the genotype.
- DO present a warning if haplotypes are inconsistent.
- DO present a warning if the DNA Quality Control test does not pass.
- DO present a warning if the No Template Control test does not pass.
- When a reaction pattern cannot be explained by any combination of alleles, DO NOT ask to attempt to perform what-if pattern analysis.
- In case of an "incomplete" test result, DO automatically choose the only valid assignment.
- When the genotype result requires a rare allele assignment, DO ask to attempt to perform what-if pattern analysis.
- DO perform HaploCheck analysis when possible.
- In case of an "ambiguous rare" test result, DO NOT automatically choose the only valid test call that does not require the assignment of a rare allele.

The results for each test were:

- HLA-A: A\*02 A\*02 → A2 A2
- HLA-B: B\*44 B\*44 → B44 B44
- Bw: Bw4 Bw4
- HLA-C: C\*05 C\*05 → Cw5 Cw5 (manual)
- HLA-DRB1: DRB1\*07 DRB1\*11 → DR7 DR11
- HLA-DRB345: DRB3\*02 DRB4\*01:03:01:02N → DR52 DR53-Null
- HLA-DQA1: DQA1\*02 DQA1\*05
- HLA-DQB1: DQB1\*03 DQB1\*03 → DQ7 DQ9
- HLA-DPA1: DPA1\*01 DPA1\*01
- HLA-DPB1: ambiguous rare
- DQC: Pass
- NTC: Pass

Notice: Cannot exclude other combinations. Review all results.

2/1/2023  
2:57 PM

admin reviewed this session and manually chose the test call:  
EDP\*04 EDP\*04

Notice: Cannot exclude other combinations. Review all results.

2/1/2023  
2:57 PM

admin analyzed this session using SureTyper version 6.1.7 build with the following set of system preferences:

- For new sessions, use the KIT'S ORIGINAL allele database release.
- DO display the phenotype as the genotype group for Cw12, Cw14, Cw15, Cw16, Cw17, Cw18.
- For HLA-DQA1 typings, present the phenotype same as the genotype.
- For HLA-DPA1 typings, present the phenotype same as the genotype.
- DO present a warning if haplotypes are inconsistent.
- DO present a warning if the DNA Quality Control test does not pass.
- DO present a warning if the No Template Control test does not pass.
- When a reaction pattern cannot be explained by any combination of alleles, DO NOT ask to attempt to perform what-if pattern analysis.
- In case of an "incomplete" test result, DO automatically choose the only valid assignment.
- When the genotype result requires a rare allele assignment, DO ask to attempt to perform what-if pattern analysis.
- DO perform HaploCheck analysis when possible.
- In case of an "ambiguous rare" test result, DO NOT automatically choose the only valid test call that does not require the assignment of a rare allele.

The results for each test were:

- HLA-A: A\*02 A\*02 → A2 A2
- HLA-B: B\*44 B\*44 → B44 B44
- Bw: Bw4 Bw4
- HLA-C: C\*05 C\*05 → Cw5 Cw5 (manual)
- HLA-DRB1: DRB1\*07 DRB1\*11 → DR7 DR11
- HLA-DRB345: DRB3\*02 DRB4\*01:03:01:02N → DR52 DR53-Null
- HLA-DQA1: DQA1\*02 DQA1\*05
- HLA-DQB1: DQB1\*03 DQB1\*03 → DQ7 DQ9
- HLA-DPA1: DPA1\*01 DPA1\*01
- HLA-DPB1: EDP04 EDP04 (manual)
- DQC: Pass
- NTC: Pass

Notice: Cannot exclude other combinations. Review all results.



## REFERENCES

SureTyper™ makes use of information from the HLA/IMGT database. We acknowledge such use with the following citations:

Robinson J, Waller MJ, Fail SC, McWilliam H, Lopez R, Parham P, Marsh SGE  
**The IMGT/HLA database**

*Nucleic Acids Research* (2009), **37**:D1013-7

Robinson J, Malik A, Parham P, Bodmer JG, Marsh SGE  
**IMGT/HLA - a sequence database for the human major histocompatibility complex**

*Tissue Antigens* (2000), **55**:280-287

SureTyper also makes use of HLA information from:

R. Holdsworth, C. K. Hurley, S. G. E. Marsh, M. Lau, H. J. Noreen, J. H. Kempenich, M. Setterholm, & M. Maiers  
**The HLA dictionary 2008: a summary of HLA-A, -B, -C, -DRB1/3/4/5, and -DQB1 alleles and their association with serologically defined HLA-A, -B, -C, -DR, and -DQ antigens**

*Tissue Antigens* (2009), **73**:95-170

Cano, P. et al.

**Common and well-documented HLA alleles: report of the ad-hoc committee of the American Society for Histocompatibility and Immunogenetics.**

*Human Immunology* (2007), **168**:392-417

Mack, S. et al.

**Common and well-documented HLA alleles: 2012 update to the CWD catalogue.**

*Tissue Antigens* (2013), **81**:194-203

NMDP web page:

**High-Resolution HLA Alleles and Haplotypes in the US Population**

[http://bioinformatics.nmdp.org/HLA/Haplotype\\_Frequencies/High\\_Res\\_HLA\\_Alleles\\_US\\_Pop/High-Resolution\\_HLA\\_Alleles\\_and\\_Haplotypes\\_in\\_the\\_US\\_Population.aspx](http://bioinformatics.nmdp.org/HLA/Haplotype_Frequencies/High_Res_HLA_Alleles_US_Pop/High-Resolution_HLA_Alleles_and_Haplotypes_in_the_US_Population.aspx)

For additional detail:

Maiers, M., Gragert, L., Klitz, W.

**High resolution HLA alleles and haplotypes in the US population.**

*Human Immunology* (2007), **68**:779-788

Bodmer, J.G., et al.

**Nomenclature for factors of the HLA system, 1991.**

*Tissue Antigens* (1992) **39**:161-173

IMGT Repertoire (MH) web page:

**Correspondence between serological DR families and HLA-DRB gene and allele: main haplotypes**

[http://www.imgt.org/IMGTrepertoireMHC/LocusGenes/nomenclatures/human/MHC/hla\\_correspondance\\_dr\\_drb.html](http://www.imgt.org/IMGTrepertoireMHC/LocusGenes/nomenclatures/human/MHC/hla_correspondance_dr_drb.html)
